# Supplementary material for: Cyanide Complexes Based on {Mo6I8}4+ and {W6I8}4+ Cluster Cores
Source: MDPI journal article supplement (doi:10.3390/molecules25245796), 2020-12-08

# checkCIF/PLATON report

Structure factors have been supplied for datablock(s) pr771

THIS REPORT IS FOR GUIDANCE ONLY. IF USED AS PART OF A REVIEW PROCEDURE FOR PUBLICATION, IT SHOULD NOT REPLACE THE EXPERTISE OF AN EXPERIENCED CRYSTALLOGRAPHIC REFEREE.

No syntax errors found.      CIF dictionary      Interpreting this report

## Datablock: pr771

---

|                 |                                        |                                |
|-----------------|----------------------------------------|--------------------------------|
| Bond precision: | C-C = 0.0163 A                         | Wavelength=0.71073             |
| Cell:           | a=37.2726(6)                           | b=24.8482(5)      c=28.2845(5) |
|                 | alpha=90                               | beta=111.997(2)      gamma=90  |
| Temperature:    | 140 K                                  |                                |
|                 | Calculated                             | Reported                       |
| Volume          | 24288.9(8)                             | 24288.9(8)                     |
| Space group     | C 2/c                                  | C 2/c                          |
| Hall group      | -C 2yc                                 | -C 2yc                         |
|                 | 2(C6 I8 Mo6 N6), C16 H32               |                                |
| Moiety formula  | N, C16 H29 N, C16 H30 N, C16 H36 N, 1. | ?                              |
| Sum formula     | C76 H127 I16 Mo12 N16                  | C38 H73.40 I8 Mo6 N8 O0.70     |
| Mr              | 4469.02                                | 2244.48                        |
| Dx,g cm-3       | 2.444                                  | 2.455                          |
| Z               | 8                                      | 16                             |
| Mu (mm-1)       | 5.303                                  | 5.303                          |
| F000            | 16465.6                                | 16624.0                        |
| F000'           | 16243.62                               |                                |
| h,k,lmax        | 44,29,34                               | 44,29,34                       |
| Nref            | 22225                                  | 22210                          |
| Tmin,Tmax       | 0.535,0.620                            | 0.903,1.000                    |
| Tmin'           | 0.381                                  |                                |

Correction method= # Reported T Limits: Tmin=0.903 Tmax=1.000  
AbsCorr = MULTI-SCAN

Data completeness= 0.999      Theta(max)= 25.349

R(reflections)= 0.0393( 16412)      wR2(reflections)= 0.0979( 22210)

S = 1.053      Npar= 1188

The following ALERTS were generated. Each ALERT has the format

**test-name\_ALERT\_alert-type\_alert-level.**

Click on the hyperlinks for more details of the test.

---

**Alert level B**

|                   |                                                  |       |       |
|-------------------|--------------------------------------------------|-------|-------|
| PLAT315_ALERT_2_B | Singly Bonded Carbon Detected (H-atoms Missing). | C335  | Check |
| PLAT315_ALERT_2_B | Singly Bonded Carbon Detected (H-atoms Missing). | C435  | Check |
| PLAT360_ALERT_2_B | Short C(sp3)-C(sp3) Bond C233 - C234             | 1.28  | Ang.  |
| PLAT410_ALERT_2_B | Short Intra H...H Contact H42A ..H44D            | 1.85  | Ang.  |
|                   | x,y,z =                                          | 1_555 | Check |

---

**Alert level C**

|                   |                                                  |         |        |
|-------------------|--------------------------------------------------|---------|--------|
| PLAT041_ALERT_1_C | Calc. and Reported SumFormula Strings Differ     | Please  | Check  |
| PLAT043_ALERT_1_C | Calculated and Reported Mol. Weight Differ by .. | 19.94   | Check  |
| PLAT068_ALERT_1_C | Reported F000 Differs from Calcd (or Missing)... | Please  | Check  |
| PLAT077_ALERT_4_C | Unitcell Contains Non-integer Number of Atoms .. | Please  | Check  |
| PLAT223_ALERT_4_C | Solv./Anion Resd 6 H Ueq(max)/Ueq(min) Range     | 4.9     | Ratio  |
| PLAT234_ALERT_4_C | Large Hirshfeld Difference N2 --C211             | 0.16    | Ang.   |
| PLAT234_ALERT_4_C | Large Hirshfeld Difference N2 --C231             | 0.17    | Ang.   |
| PLAT234_ALERT_4_C | Large Hirshfeld Difference C212 --C213           | 0.20    | Ang.   |
| PLAT234_ALERT_4_C | Large Hirshfeld Difference C223 --C224           | 0.17    | Ang.   |
| PLAT234_ALERT_4_C | Large Hirshfeld Difference C233 --C234           | 0.20    | Ang.   |
| PLAT234_ALERT_4_C | Large Hirshfeld Difference C323 --C324           | 0.20    | Ang.   |
| PLAT234_ALERT_4_C | Large Hirshfeld Difference C333 --C335           | 0.19    | Ang.   |
| PLAT234_ALERT_4_C | Large Hirshfeld Difference C341 --C342           | 0.16    | Ang.   |
| PLAT234_ALERT_4_C | Large Hirshfeld Difference C342 --C345           | 0.17    | Ang.   |
| PLAT234_ALERT_4_C | Large Hirshfeld Difference C133 --C134           | 0.20    | Ang.   |
| PLAT241_ALERT_2_C | High MainMol Ueq as Compared to Neighbors of     | C231    | Check  |
| PLAT241_ALERT_2_C | High MainMol Ueq as Compared to Neighbors of     | C241    | Check  |
| PLAT242_ALERT_2_C | Low MainMol Ueq as Compared to Neighbors of      | N2      | Check  |
| PLAT242_ALERT_2_C | Low MainMol Ueq as Compared to Neighbors of      | C213    | Check  |
| PLAT242_ALERT_2_C | Low MainMol Ueq as Compared to Neighbors of      | N3      | Check  |
| PLAT242_ALERT_2_C | Low MainMol Ueq as Compared to Neighbors of      | C323    | Check  |
| PLAT250_ALERT_2_C | Large U3/U1 Ratio for Average U(i,j) Tensor .... | 2.5     | Note   |
| PLAT260_ALERT_2_C | Large Average Ueq of Residue Including N4        | 0.102   | Check  |
| PLAT342_ALERT_3_C | Low Bond Precision on C-C Bonds .....            | 0.01631 | Ang.   |
| PLAT360_ALERT_2_C | Short C(sp3)-C(sp3) Bond C231 - C232             | 1.41    | Ang.   |
| PLAT360_ALERT_2_C | Short C(sp3)-C(sp3) Bond C413 - C414             | 1.43    | Ang.   |
| PLAT362_ALERT_2_C | Short C(sp3)-C(sp2) Bond C442 - C443             | 1.40    | Ang.   |
| PLAT430_ALERT_2_C | Short Inter D...A Contact N12 ..O2W              | 2.88    | Ang.   |
|                   | x,y,z =                                          | 1_555   | Check  |
| PLAT906_ALERT_3_C | Large K Value in the Analysis of Variance .....  | 3.703   | Check  |
| PLAT910_ALERT_3_C | Missing # of FCF Reflection(s) Below Theta(Min). | 10      | Note   |
| PLAT911_ALERT_3_C | Missing FCF Refl Between Thmin & STh/L= 0.600    | 6       | Report |
| PLAT971_ALERT_2_C | Check Calcd Resid. Dens. 1.39A From C233         | 1.70    | eA-3   |
| PLAT977_ALERT_2_C | Check Negative Difference Density on H22E        | -0.33   | eA-3   |
| PLAT977_ALERT_2_C | Check Negative Difference Density on H31C        | -0.37   | eA-3   |
| PLAT977_ALERT_2_C | Check Negative Difference Density on H32G        | -0.37   | eA-3   |
| PLAT977_ALERT_2_C | Check Negative Difference Density on H44D        | -0.32   | eA-3   |
| PLAT978_ALERT_2_C | Number C-C Bonds with Positive Residual Density. | 0       | Info   |

---

**Alert level G**

FORMU01\_ALERT\_2\_G There is a discrepancy between the atom counts in the  
\_chemical\_formula\_sum and the formula from the \_atom\_site\* data.  
Atom count from \_chemical\_formula\_sum: C38 H73.4 I8 Mo6 N8 O0.7  
Atom count from the \_atom\_site data: C38 H63.5 I8 Mo6 N8 O0.7  
CELLZ01\_ALERT\_1\_G Difference between formula and atom\_site contents detected.

CELLZ01\_ALERT\_1\_G WARNING: H atoms missing from atom site list. Is this intentional?  
 From the CIF: \_cell\_formula\_units\_Z 16  
 From the CIF: \_chemical\_formula\_sum C38 H73.40 I8 Mo6 N8 O0.70  
 TEST: Compare cell contents of formula and atom\_site data

| atom | Z*formula | cif sites | diff   |
|------|-----------|-----------|--------|
| C    | 608.00    | 608.00    | 0.00   |
| H    | 1174.40   | 1016.00   | 158.40 |
| I    | 128.00    | 128.00    | 0.00   |
| Mo   | 96.00     | 96.00     | 0.00   |
| N    | 128.00    | 128.00    | 0.00   |
| O    | 11.20     | 11.20     | 0.00   |

|                   |                                                  |        |        |
|-------------------|--------------------------------------------------|--------|--------|
| PLAT002_ALERT_2_G | Number of Distance or Angle Restraints on AtSite | 27     | Note   |
| PLAT003_ALERT_2_G | Number of Uiso or Uij Restrained non-H Atoms ... | 54     | Report |
| PLAT045_ALERT_1_G | Calculated and Reported Z Differ by a Factor ... | 0.50   | Check  |
| PLAT083_ALERT_2_G | SHELXL Second Parameter in WGHT Unusually Large  | 122.30 | Why ?  |
| PLAT176_ALERT_4_G | The CIF-Embedded .res File Contains SADI Records | 2      | Report |
| PLAT178_ALERT_4_G | The CIF-Embedded .res File Contains SIMU Records | 5      | Report |
| PLAT186_ALERT_4_G | The CIF-Embedded .res File Contains ISOR Records | 1      | Report |
| PLAT232_ALERT_2_G | Hirshfeld Test Diff (M-X) I11 --Mo13 .           | 7.3    | s.u.   |
| PLAT232_ALERT_2_G | Hirshfeld Test Diff (M-X) I12 --Mo12 .           | 6.0    | s.u.   |
| PLAT232_ALERT_2_G | Hirshfeld Test Diff (M-X) I12 --Mo15 .           | 6.3    | s.u.   |
| PLAT232_ALERT_2_G | Hirshfeld Test Diff (M-X) I12 --Mo16 .           | 6.8    | s.u.   |
| PLAT232_ALERT_2_G | Hirshfeld Test Diff (M-X) I15 --Mo13 .           | 6.8    | s.u.   |
| PLAT232_ALERT_2_G | Hirshfeld Test Diff (M-X) I17 --Mo12 .           | 5.3    | s.u.   |
| PLAT232_ALERT_2_G | Hirshfeld Test Diff (M-X) I17 --Mo15 .           | 5.3    | s.u.   |
| PLAT232_ALERT_2_G | Hirshfeld Test Diff (M-X) I18 --Mo14 .           | 5.0    | s.u.   |
| PLAT232_ALERT_2_G | Hirshfeld Test Diff (M-X) I18 --Mo16 .           | 6.3    | s.u.   |
| PLAT232_ALERT_2_G | Hirshfeld Test Diff (M-X) I21 --Mo23 .           | 5.0    | s.u.   |
| PLAT232_ALERT_2_G | Hirshfeld Test Diff (M-X) I21 --Mo24 .           | 5.3    | s.u.   |
| PLAT232_ALERT_2_G | Hirshfeld Test Diff (M-X) I22 --Mo25 .           | 5.3    | s.u.   |
| PLAT232_ALERT_2_G | Hirshfeld Test Diff (M-X) I23 --Mo22 .           | 7.0    | s.u.   |
| PLAT232_ALERT_2_G | Hirshfeld Test Diff (M-X) I26 --Mo21 .           | 6.5    | s.u.   |
| PLAT232_ALERT_2_G | Hirshfeld Test Diff (M-X) I26 --Mo25 .           | 5.8    | s.u.   |
| PLAT232_ALERT_2_G | Hirshfeld Test Diff (M-X) I28 --Mo22 .           | 5.8    | s.u.   |
| PLAT232_ALERT_2_G | Hirshfeld Test Diff (M-X) I28 --Mo26 .           | 6.5    | s.u.   |
| PLAT300_ALERT_4_G | Atom Site Occupancy of C224 Constrained at       | 0.7    | Check  |
| PLAT300_ALERT_4_G | Atom Site Occupancy of C243 Constrained at       | 0.5    | Check  |
| PLAT300_ALERT_4_G | Atom Site Occupancy of C244 Constrained at       | 0.5    | Check  |
| PLAT300_ALERT_4_G | Atom Site Occupancy of C245 Constrained at       | 0.5    | Check  |
| PLAT300_ALERT_4_G | Atom Site Occupancy of C246 Constrained at       | 0.5    | Check  |
| PLAT300_ALERT_4_G | Atom Site Occupancy of C225 Constrained at       | 0.3    | Check  |
| PLAT300_ALERT_4_G | Atom Site Occupancy of H22E Constrained at       | 0.7    | Check  |
| PLAT300_ALERT_4_G | Atom Site Occupancy of H22F Constrained at       | 0.7    | Check  |
| PLAT300_ALERT_4_G | Atom Site Occupancy of H22G Constrained at       | 0.7    | Check  |
| PLAT300_ALERT_4_G | Atom Site Occupancy of H24C Constrained at       | 0.5    | Check  |
| PLAT300_ALERT_4_G | Atom Site Occupancy of H24D Constrained at       | 0.5    | Check  |
| PLAT300_ALERT_4_G | Atom Site Occupancy of H24E Constrained at       | 0.5    | Check  |
| PLAT300_ALERT_4_G | Atom Site Occupancy of H24F Constrained at       | 0.5    | Check  |
| PLAT300_ALERT_4_G | Atom Site Occupancy of H24G Constrained at       | 0.5    | Check  |
| PLAT300_ALERT_4_G | Atom Site Occupancy of H24H Constrained at       | 0.5    | Check  |
| PLAT300_ALERT_4_G | Atom Site Occupancy of H24I Constrained at       | 0.5    | Check  |
| PLAT300_ALERT_4_G | Atom Site Occupancy of H24J Constrained at       | 0.5    | Check  |
| PLAT300_ALERT_4_G | Atom Site Occupancy of H24K Constrained at       | 0.5    | Check  |
| PLAT300_ALERT_4_G | Atom Site Occupancy of H24L Constrained at       | 0.5    | Check  |
| PLAT300_ALERT_4_G | Atom Site Occupancy of H22H Constrained at       | 0.3    | Check  |
| PLAT300_ALERT_4_G | Atom Site Occupancy of H22I Constrained at       | 0.3    | Check  |
| PLAT300_ALERT_4_G | Atom Site Occupancy of H22J Constrained at       | 0.3    | Check  |
| PLAT300_ALERT_4_G | Atom Site Occupancy of C333 Constrained at       | 0.7    | Check  |
| PLAT300_ALERT_4_G | Atom Site Occupancy of C343 Constrained at       | 0.6    | Check  |
| PLAT300_ALERT_4_G | Atom Site Occupancy of C344 Constrained at       | 0.6    | Check  |
| PLAT300_ALERT_4_G | Atom Site Occupancy of C334 Constrained at       | 0.3    | Check  |

|                   |                                                  |                      |       |              |
|-------------------|--------------------------------------------------|----------------------|-------|--------------|
| PLAT300_ALERT_4_G | Atom Site Occupancy of C345                      | Constrained at       | 0.4   | Check        |
| PLAT300_ALERT_4_G | Atom Site Occupancy of C346                      | Constrained at       | 0.4   | Check        |
| PLAT300_ALERT_4_G | Atom Site Occupancy of H33C                      | Constrained at       | 0.7   | Check        |
| PLAT300_ALERT_4_G | Atom Site Occupancy of H33D                      | Constrained at       | 0.7   | Check        |
| PLAT300_ALERT_4_G | Atom Site Occupancy of H34C                      | Constrained at       | 0.6   | Check        |
| PLAT300_ALERT_4_G | Atom Site Occupancy of H34D                      | Constrained at       | 0.6   | Check        |
| PLAT300_ALERT_4_G | Atom Site Occupancy of H34E                      | Constrained at       | 0.6   | Check        |
| PLAT300_ALERT_4_G | Atom Site Occupancy of H34F                      | Constrained at       | 0.6   | Check        |
| PLAT300_ALERT_4_G | Atom Site Occupancy of H34G                      | Constrained at       | 0.6   | Check        |
| PLAT300_ALERT_4_G | Atom Site Occupancy of H33E                      | Constrained at       | 0.3   | Check        |
| PLAT300_ALERT_4_G | Atom Site Occupancy of H33F                      | Constrained at       | 0.3   | Check        |
| PLAT300_ALERT_4_G | Atom Site Occupancy of H34H                      | Constrained at       | 0.4   | Check        |
| PLAT300_ALERT_4_G | Atom Site Occupancy of H34I                      | Constrained at       | 0.4   | Check        |
| PLAT300_ALERT_4_G | Atom Site Occupancy of H34J                      | Constrained at       | 0.4   | Check        |
| PLAT300_ALERT_4_G | Atom Site Occupancy of H34K                      | Constrained at       | 0.4   | Check        |
| PLAT300_ALERT_4_G | Atom Site Occupancy of H34L                      | Constrained at       | 0.4   | Check        |
| PLAT300_ALERT_4_G | Atom Site Occupancy of C433                      | Constrained at       | 0.5   | Check        |
| PLAT300_ALERT_4_G | Atom Site Occupancy of C434                      | Constrained at       | 0.5   | Check        |
| PLAT300_ALERT_4_G | Atom Site Occupancy of H43C                      | Constrained at       | 0.5   | Check        |
| PLAT300_ALERT_4_G | Atom Site Occupancy of H43D                      | Constrained at       | 0.5   | Check        |
| PLAT300_ALERT_4_G | Atom Site Occupancy of H43E                      | Constrained at       | 0.5   | Check        |
| PLAT300_ALERT_4_G | Atom Site Occupancy of H43F                      | Constrained at       | 0.5   | Check        |
| PLAT300_ALERT_4_G | Atom Site Occupancy of O1W                       | Constrained at       | 0.6   | Check        |
| PLAT300_ALERT_4_G | Atom Site Occupancy of O2W                       | Constrained at       | 0.4   | Check        |
| PLAT300_ALERT_4_G | Atom Site Occupancy of O3W                       | Constrained at       | 0.4   | Check        |
| PLAT302_ALERT_4_G | Anion/Solvent/Minor-Residue Disorder (Resd 3 )   |                      | 18%   | Note         |
| PLAT302_ALERT_4_G | Anion/Solvent/Minor-Residue Disorder (Resd 4 )   |                      | 18%   | Note         |
| PLAT302_ALERT_4_G | Anion/Solvent/Minor-Residue Disorder (Resd 5 )   |                      | 6%    | Note         |
| PLAT302_ALERT_4_G | Anion/Solvent/Minor-Residue Disorder (Resd 7 )   |                      | 100%  | Note         |
| PLAT302_ALERT_4_G | Anion/Solvent/Minor-Residue Disorder (Resd 8 )   |                      | 100%  | Note         |
| PLAT302_ALERT_4_G | Anion/Solvent/Minor-Residue Disorder (Resd 9 )   |                      | 100%  | Note         |
| PLAT304_ALERT_4_G | Non-Integer Number of Atoms in ..... (Resd 7 )   |                      | 0.60  | Check        |
| PLAT304_ALERT_4_G | Non-Integer Number of Atoms in ..... (Resd 8 )   |                      | 0.40  | Check        |
| PLAT304_ALERT_4_G | Non-Integer Number of Atoms in ..... (Resd 9 )   |                      | 0.40  | Check        |
| PLAT311_ALERT_2_G | Isolated Disordered Oxygen Atom (No H's ?) ..... |                      | O1W   | Check        |
| PLAT311_ALERT_2_G | Isolated Disordered Oxygen Atom (No H's ?) ..... |                      | O2W   | Check        |
| PLAT311_ALERT_2_G | Isolated Disordered Oxygen Atom (No H's ?) ..... |                      | O3W   | Check        |
| PLAT410_ALERT_2_G | Short Intra H...H Contact H43A ..H43D .          |                      | 1.85  | Ang.         |
|                   |                                                  | x,y,z =              | 1_555 | Check        |
| PLAT411_ALERT_2_G | Short Inter H...H Contact H33C ..H443 .          |                      | 2.03  | Ang.         |
|                   |                                                  | 1/2-x,-1/2+y,1/2-z = | 4_545 | Check        |
| PLAT412_ALERT_2_G | Short Intra XH3 .. XHn H22D ..H22I .             |                      | 2.01  | Ang.         |
|                   |                                                  | x,y,z =              | 1_555 | Check        |
| PLAT413_ALERT_2_G | Short Inter XH3 .. XHn H22D ..H22G .             |                      | 2.12  | Ang.         |
|                   |                                                  | 1-x,y,1/2-z =        | 2_655 | Check        |
| PLAT413_ALERT_2_G | Short Inter XH3 .. XHn H41E ..H34J .             |                      | 1.87  | Ang.         |
|                   |                                                  | 1/2-x,1/2-y,1-z =    | 7_556 | Check        |
| PLAT431_ALERT_2_G | Short Inter HL..A Contact I23 ..N14 .            |                      | 3.29  | Ang.         |
|                   |                                                  | x,y,z =              | 1_555 | Check        |
| PLAT431_ALERT_2_G | Short Inter HL..A Contact I24 ..N25 .            |                      | 3.26  | Ang.         |
|                   |                                                  | -x,y,1/2-z =         | 2_555 | Check        |
| PLAT432_ALERT_2_G | Short Inter X...Y Contact N16 ..C345             |                      | 2.95  | Ang.         |
|                   |                                                  | 1/2-x,1/2+y,1/2-z =  | 4_555 | Check        |
| PLAT432_ALERT_2_G | Short Inter X...Y Contact O3W ..C422             |                      | 2.98  | Ang.         |
|                   |                                                  | x,y,z =              | 1_555 | Check        |
| PLAT860_ALERT_3_G | Number of Least-Squares Restraints .....         |                      | 619   | Note         |
| PLAT913_ALERT_3_G | Missing # of Very Strong Reflections in FCF .... |                      | 1     | Note         |
| PLAT961_ALERT_5_G | Dataset Contains no Negative Intensities .....   |                      |       | Please Check |

---

0 **ALERT level A** = Most likely a serious problem - resolve or explain

4 **ALERT level B** = A potentially serious problem, consider carefully

37 **ALERT level C** = Check. Ensure it is not caused by an omission or oversight  
102 **ALERT level G** = General information/check it is not something unexpected

6 ALERT type 1 CIF construction/syntax error, inconsistent or missing data  
55 ALERT type 2 Indicator that the structure model may be wrong or deficient  
6 ALERT type 3 Indicator that the structure quality may be low  
75 ALERT type 4 Improvement, methodology, query or suggestion  
1 ALERT type 5 Informative message, check

---

It is advisable to attempt to resolve as many as possible of the alerts in all categories. Often the minor alerts point to easily fixed oversights, errors and omissions in your CIF or refinement strategy, so attention to these fine details can be worthwhile. In order to resolve some of the more serious problems it may be necessary to carry out additional measurements or structure refinements. However, the purpose of your study may justify the reported deviations and the more serious of these should normally be commented upon in the discussion or experimental section of a paper or in the "special\_details" fields of the CIF. checkCIF was carefully designed to identify outliers and unusual parameters, but every test has its limitations and alerts that are not important in a particular case may appear. Conversely, the absence of alerts does not guarantee there are no aspects of the results needing attention. It is up to the individual to critically assess their own results and, if necessary, seek expert advice.

### **Publication of your CIF in IUCr journals**

A basic structural check has been run on your CIF. These basic checks will be run on all CIFs submitted for publication in IUCr journals (*Acta Crystallographica*, *Journal of Applied Crystallography*, *Journal of Synchrotron Radiation*); however, if you intend to submit to *Acta Crystallographica Section C* or *E* or *IUCrData*, you should make sure that full publication checks are run on the final version of your CIF prior to submission.

### **Publication of your CIF in other journals**

Please refer to the *Notes for Authors* of the relevant journal for any special instructions relating to CIF submission.

---

**PLATON version of 22/12/2019; check.def file version of 13/12/2019**

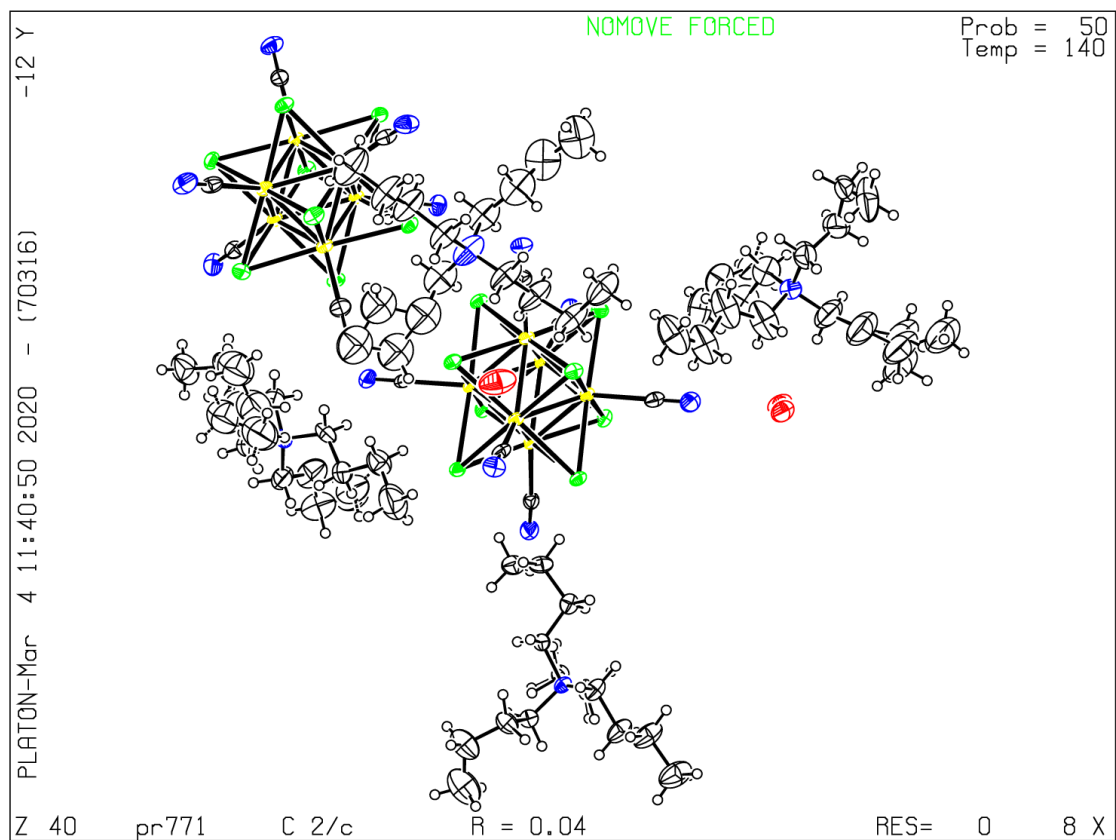

Supplement: s1 [file s1 › Compound 2 checkcif.pdf]
