# Supplementary material for: Cyanide Complexes Based on {Mo6I8}4+ and {W6I8}4+ Cluster Cores
Source: MDPI journal article supplement (doi:10.3390/molecules25245796), 2020-12-08

# checkCIF/PLATON report

Structure factors have been supplied for datablock(s) pr780

THIS REPORT IS FOR GUIDANCE ONLY. IF USED AS PART OF A REVIEW PROCEDURE FOR PUBLICATION, IT SHOULD NOT REPLACE THE EXPERTISE OF AN EXPERIENCED CRYSTALLOGRAPHIC REFEREE.

No syntax errors found.      CIF dictionary      Interpreting this report

## Datablock: pr780

---

Bond precision:    C-C = 0.0080 Å                      Wavelength=0.71073

Cell:                      a=14.6656(3)              b=14.6656(3)              c=14.5746(4)  
                            alpha=90                      beta=90                      gamma=90  
Temperature:              150 K

|                        | Calculated                       | Reported             |
|------------------------|----------------------------------|----------------------|
| Volume                 | 3134.70(15)                      | 3134.70(15)          |
| Space group            | I 4/m m m                        | I 4/m m m            |
| Hall group             | -I 4 2                           | -I 4 2               |
| Moiety formula         | C6 H6 I8 Mo6 N4 O2, 2(C16 H36 N) | ?                    |
| Sum formula            | C38 H78 I8 Mo6 N6 O2             | C38 H78 I8 Mo6 N6 O2 |
| Mr                     | 2241.90                          | 2241.90              |
| Dx, g cm <sup>-3</sup> | 2.375                            | 2.375                |
| Z                      | 2                                | 2                    |
| Mu (mm <sup>-1</sup> ) | 5.137                            | 5.137                |
| F000                   | 2080.0                           | 2080.0               |
| F000'                  | 2052.27                          |                      |
| h,k,lmax               | 20,20,20                         | 20,19,19             |
| Nref                   | 1294                             | 1223                 |
| Tmin,Tmax              | 0.457,0.663                      | 0.824,1.000          |
| Tmin'                  | 0.423                            |                      |

Correction method= # Reported T Limits: Tmin=0.824 Tmax=1.000  
AbsCorr = MULTI-SCAN

Data completeness= 0.945                      Theta(max)= 29.580

R(reflections)= 0.0199( 1101)              wR2(reflections)= 0.0565( 1223)

S = 1.091                      Npar= 72

---

```
test-name ALERT alert-type alert-level.
```

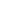 Alert level B

- Alert level C

Alert level G

|                   |                                                  |                |       |        |        |       |        |
|-------------------|--------------------------------------------------|----------------|-------|--------|--------|-------|--------|
| PLAT002_ALERT_2_G | Number of Distance or Angle Restraints on AtSite |                |       |        |        | 6     | Note   |
| PLAT003_ALERT_2_G | Number of Uiso or Uij Restrained non-H Atoms ... |                |       |        |        | 2     | Report |
| PLAT083_ALERT_2_G | SHELXL Second Parameter in WGHT Unusually Large  |                |       |        |        | 13.16 | Why ?  |
| PLAT164_ALERT_4_G | Nr. of Refined C-H H-Atoms in Heavy-Atom Struct. |                |       |        |        | 3     | Note   |
| PLAT172_ALERT_4_G | The CIF-Embedded .res File Contains DFIX Records |                |       |        |        | 4     | Report |
| PLAT178_ALERT_4_G | The CIF-Embedded .res File Contains SIMU Records |                |       |        |        | 1     | Report |
| PLAT232_ALERT_2_G | Hirshfeld Test Diff (M-X) I2                     | --Mol          | .     |        |        | 7.5   | s.u.   |
| PLAT232_ALERT_2_G | Hirshfeld Test Diff (M-X) I2                     | --Mo2          | .     |        |        | 9.0   | s.u.   |
| PLAT300_ALERT_4_G | Atom Site Occupancy of O2                        | Constrained at |       |        |        | 0.25  | Check  |
| PLAT300_ALERT_4_G | Atom Site Occupancy of C2                        | Constrained at |       |        |        | 0.25  | Check  |
| PLAT300_ALERT_4_G | Atom Site Occupancy of H2A                       | Constrained at |       |        |        | 0.125 | Check  |
| PLAT300_ALERT_4_G | Atom Site Occupancy of H2B                       | Constrained at |       |        |        | 0.125 | Check  |
| PLAT300_ALERT_4_G | Atom Site Occupancy of H2C                       | Constrained at |       |        |        | 0.125 | Check  |
| PLAT300_ALERT_4_G | Atom Site Occupancy of C4N                       | Constrained at |       |        |        | 0.5   | Check  |
| PLAT300_ALERT_4_G | Atom Site Occupancy of H1N1                      | Constrained at |       |        |        | 0.5   | Check  |
| PLAT300_ALERT_4_G | Atom Site Occupancy of H1N2                      | Constrained at |       |        |        | 0.5   | Check  |
| PLAT300_ALERT_4_G | Atom Site Occupancy of H4N1                      | Constrained at |       |        |        | 0.5   | Check  |
| PLAT300_ALERT_4_G | Atom Site Occupancy of H4N2                      | Constrained at |       |        |        | 0.5   | Check  |
| PLAT300_ALERT_4_G | Atom Site Occupancy of H4N3                      | Constrained at |       |        |        | 0.5   | Check  |
| PLAT300_ALERT_4_G | Atom Site Occupancy of H32N                      | Constrained at |       |        |        | 0.5   | Check  |
| PLAT301_ALERT_3_G | Main Residue Disorder .....(Resd 1 )             |                |       |        |        | 27%   | Note   |
| PLAT302_ALERT_4_G | Anion/Solvent/Minor-Residue Disorder (Resd 2 )   |                |       |        |        | 24%   | Note   |
| PLAT367_ALERT_2_G | Long? C(sp?)-C(sp?) Bond C1N                     | - C2N          | .     |        |        | 1.51  | Ang.   |
| PLAT367_ALERT_2_G | Long? C(sp?)-C(sp?) Bond C2N                     | - C3N          | .     |        |        | 1.54  | Ang.   |
| PLAT411_ALERT_2_G | Short Inter H...H Contact H31N                   | ..H2A          | .     |        |        | 1.76  | Ang.   |
|                   |                                                  | x,y,z =        |       |        | 1_555  | Check |        |
| PLAT411_ALERT_2_G | Short Inter H...H Contact H31N                   | ..H2C          | .     |        |        | 2.11  | Ang.   |
|                   |                                                  | 1-y,x,z =      |       |        | 3_655  | Check |        |
| PLAT411_ALERT_2_G | Short Inter H...H Contact H31N                   | ..H2C          | .     |        |        | 2.11  | Ang.   |
|                   |                                                  | y,x,z =        |       |        | 24_555 | Check |        |
| PLAT432_ALERT_2_G | Short Inter X...Y Contact C4N                    | ..C4N          |       |        |        | 2.99  | Ang.   |
|                   |                                                  | y,x,z =        |       |        | 24_555 | Check |        |
| PLAT720_ALERT_4_G | Number of Unusual/Non-Standard Labels .....      |                |       |        |        | 5     | Note   |
| PLAT779_ALERT_4_G | Suspect or Irrelevant (Bond) Angle(s) in CIF . # |                |       |        |        | 132   | Check  |
|                   | H2A -C2 -H2C                                     | 1.555          | 1.555 | 3.655  |        | 19.30 | Deg.   |
| PLAT779_ALERT_4_G | Suspect or Irrelevant (Bond) Angle(s) in CIF . # |                |       |        |        | 133   | Check  |
|                   | H2A -C2 -H2C                                     | 22.655         | 1.555 | 24.555 |        | 19.30 | Deg.   |
| PLAT779_ALERT_4_G | Suspect or Irrelevant (Bond) Angle(s) in CIF . # |                |       |        |        | 140   | Check  |
|                   | H2B -C2 -H2B                                     | 2.665          | 1.555 | 23.665 |        | 19.20 | Deg.   |
| PLAT779_ALERT_4_G | Suspect or Irrelevant (Bond) Angle(s) in CIF . # |                |       |        |        | 141   | Check  |
|                   | H2B -C2 -H2B                                     | 4.565          | 1.555 | 21.565 |        | 19.20 | Deg.   |
| PLAT779_ALERT_4_G | Suspect or Irrelevant (Bond) Angle(s) in CIF . # |                |       |        |        | 142   | Check  |
|                   | H2B -C2 -H2B                                     | 1.555          | 1.555 | 21.565 |        | 25.60 | Deg.   |
| PLAT779_ALERT_4_G | Suspect or Irrelevant (Bond) Angle(s) in CIF . # |                |       |        |        | 143   | Check  |
|                   | H2B -C2 -H2B                                     | 2.665          | 1.555 | 22.655 |        | 25.60 | Deg.   |
| PLAT779_ALERT_4_G | Suspect or Irrelevant (Bond) Angle(s) in CIF . # |                |       |        |        | 144   | Check  |

|                   |                                                  |        |                     |       |              |
|-------------------|--------------------------------------------------|--------|---------------------|-------|--------------|
| H2B -C2 -H2B      | 4.565                                            | 1.555  | 23.665              | 36.30 | Deg.         |
| PLAT779_ALERT_4_G | Suspect or Irrelevant                            | (Bond) | Angle(s) in CIF . # | 145   | Check        |
| H2B -C2 -H2B      | 1.555                                            | 1.555  | 4.565               | 41.40 | Deg.         |
| PLAT779_ALERT_4_G | Suspect or Irrelevant                            | (Bond) | Angle(s) in CIF . # | 146   | Check        |
| H2B -C2 -H2B      | 22.655                                           | 1.555  | 23.665              | 41.40 | Deg.         |
| PLAT779_ALERT_4_G | Suspect or Irrelevant                            | (Bond) | Angle(s) in CIF . # | 180   | Check        |
| H2C -C2 -H2C      | 1.555                                            | 1.555  | 24.555              | 40.50 | Deg.         |
| PLAT779_ALERT_4_G | Suspect or Irrelevant                            | (Bond) | Angle(s) in CIF . # | 181   | Check        |
| H2C -C2 -H2C      | 3.655                                            | 1.555  | 22.655              | 40.50 | Deg.         |
| PLAT779_ALERT_4_G | Suspect or Irrelevant                            | (Bond) | Angle(s) in CIF . # | 207   | Check        |
| C3N -C2N -C3N     | 22.655                                           | 1.555  | 1.555               | 0.00  | Deg.         |
| PLAT779_ALERT_4_G | Suspect or Irrelevant                            | (Bond) | Angle(s) in CIF . # | 213   | Check        |
| C3N -C3N -C2N     | 22.655                                           | 1.555  | 1.555               | 0.00  | Deg.         |
| PLAT779_ALERT_4_G | Suspect or Irrelevant                            | (Bond) | Angle(s) in CIF . # | 214   | Check        |
| C3N -C3N -H31N    | 22.655                                           | 1.555  | 1.555               | 0.00  | Deg.         |
| PLAT779_ALERT_4_G | Suspect or Irrelevant                            | (Bond) | Angle(s) in CIF . # | 215   | Check        |
| C3N -C3N -H32N    | 22.655                                           | 1.555  | 1.555               | 0.00  | Deg.         |
| PLAT779_ALERT_4_G | Suspect or Irrelevant                            | (Bond) | Angle(s) in CIF . # | 216   | Check        |
| C3N -C3N -H32N    | 22.655                                           | 1.555  | 22.655              | 0.00  | Deg.         |
| PLAT779_ALERT_4_G | Suspect or Irrelevant                            | (Bond) | Angle(s) in CIF . # | 217   | Check        |
| C3N -C3N -C4N     | 22.655                                           | 1.555  | 1.555               | 0.00  | Deg.         |
| PLAT779_ALERT_4_G | Suspect or Irrelevant                            | (Bond) | Angle(s) in CIF . # | 218   | Check        |
| C3N -C3N -C4N     | 22.655                                           | 1.555  | 22.655              | 0.00  | Deg.         |
| PLAT779_ALERT_4_G | Suspect or Irrelevant                            | (Bond) | Angle(s) in CIF . # | 224   | Check        |
| C4N -C3N -H32N    | 1.555                                            | 1.555  | 22.655              | 23.00 | Deg.         |
| PLAT779_ALERT_4_G | Suspect or Irrelevant                            | (Bond) | Angle(s) in CIF . # | 225   | Check        |
| C4N -C3N -H32N    | 22.655                                           | 1.555  | 1.555               | 23.00 | Deg.         |
| PLAT779_ALERT_4_G | Suspect or Irrelevant                            | (Bond) | Angle(s) in CIF . # | 229   | Check        |
| C3N -C4N -C3N     | 22.655                                           | 1.555  | 1.555               | 0.00  | Deg.         |
| PLAT779_ALERT_4_G | Suspect or Irrelevant                            | (Bond) | Angle(s) in CIF . # | 230   | Check        |
| C3N -C4N -H32N    | 1.555                                            | 1.555  | 22.655              | 27.00 | Deg.         |
| PLAT779_ALERT_4_G | Suspect or Irrelevant                            | (Bond) | Angle(s) in CIF . # | 231   | Check        |
| C3N -C4N -H32N    | 22.655                                           | 1.555  | 22.655              | 27.00 | Deg.         |
| PLAT860_ALERT_3_G | Number of Least-Squares Restraints               | .....  |                     | 13    | Note         |
| PLAT912_ALERT_4_G | Missing # of FCF Reflections Above STh/L=        | 0.600  |                     | 64    | Note         |
| PLAT933_ALERT_2_G | Number of OMIT Records in Embedded .res File     | ...    |                     | 2     | Note         |
| PLAT961_ALERT_5_G | Dataset Contains no Negative Intensities         | .....  |                     |       | Please Check |
| PLAT978_ALERT_2_G | Number C-C Bonds with Positive Residual Density. |        |                     | 0     | Info         |

---

0 **ALERT level A** = Most likely a serious problem - resolve or explain  
 1 **ALERT level B** = A potentially serious problem, consider carefully  
 2 **ALERT level C** = Check. Ensure it is not caused by an omission or oversight  
 57 **ALERT level G** = General information/check it is not something unexpected

0 ALERT type 1 CIF construction/syntax error, inconsistent or missing data  
 15 ALERT type 2 Indicator that the structure model may be wrong or deficient  
 3 ALERT type 3 Indicator that the structure quality may be low  
 41 ALERT type 4 Improvement, methodology, query or suggestion  
 1 ALERT type 5 Informative message, check

---

It is advisable to attempt to resolve as many as possible of the alerts in all categories. Often the minor alerts point to easily fixed oversights, errors and omissions in your CIF or refinement strategy, so attention to these fine details can be worthwhile. In order to resolve some of the more serious problems it may be necessary to carry out additional measurements or structure refinements. However, the purpose of your study may justify the reported deviations and the more serious of these should normally be commented upon in the discussion or experimental section of a paper or in the "special\_details" fields of the CIF. checkCIF was carefully designed to identify outliers and unusual parameters, but every test has its limitations and alerts that are not important in a particular case may appear. Conversely, the absence of alerts does not guarantee there are no aspects of the results needing attention. It is up to the individual to critically assess their own results and, if necessary, seek expert advice.

### **Publication of your CIF in IUCr journals**

A basic structural check has been run on your CIF. These basic checks will be run on all CIFs submitted for publication in IUCr journals (*Acta Crystallographica*, *Journal of Applied Crystallography*, *Journal of Synchrotron Radiation*); however, if you intend to submit to *Acta Crystallographica Section C* or *E* or *IUCrData*, you should make sure that full publication checks are run on the final version of your CIF prior to submission.

### **Publication of your CIF in other journals**

Please refer to the *Notes for Authors* of the relevant journal for any special instructions relating to CIF submission.

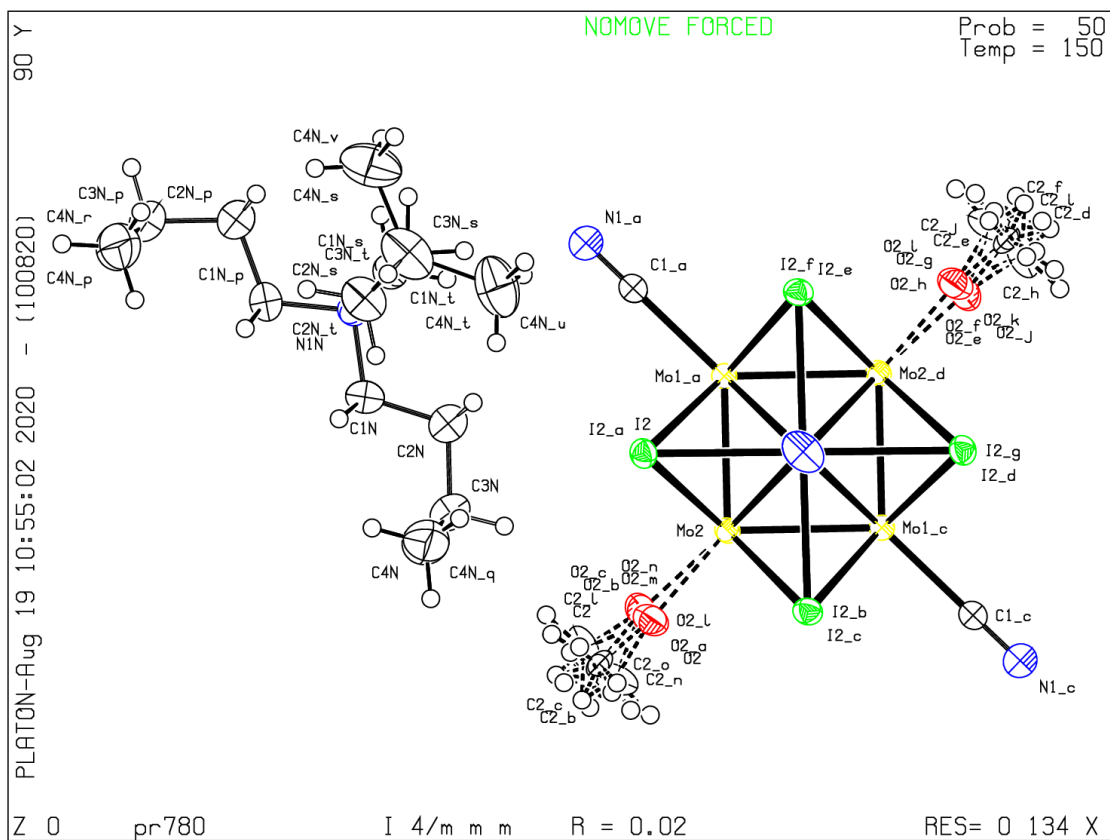

Supplement: s1 [file s1 › Compound 4 checkcif.pdf]
