# Supplementary material for: Cyanide Complexes Based on {Mo6I8}4+ and {W6I8}4+ Cluster Cores
Source: MDPI journal article supplement (doi:10.3390/molecules25245796), 2020-12-08

# checkCIF/PLATON report

Structure factors have been supplied for datablock(s) pr892

THIS REPORT IS FOR GUIDANCE ONLY. IF USED AS PART OF A REVIEW PROCEDURE FOR PUBLICATION, IT SHOULD NOT REPLACE THE EXPERTISE OF AN EXPERIENCED CRYSTALLOGRAPHIC REFEREE.

No syntax errors found.      CIF dictionary      Interpreting this report

## Datablock: pr892

---

Bond precision:    C-C = 0.0101 Å                      Wavelength=0.71073

Cell:                      a=9.8189(3)              b=15.4901(5)              c=21.8314(8)  
                            alpha=90              beta=97.512(1)              gamma=90

Temperature:            150 K

|                        | Calculated                      | Reported            |
|------------------------|---------------------------------|---------------------|
| Volume                 | 3291.97(19)                     | 3291.97(19)         |
| Space group            | P 21/n                          | P 21/n              |
| Hall group             | -P 2yn                          | -P 2yn              |
|                        | 2(C6 H12 I8 N2 O4 W6),          |                     |
| Moiety formula         | 4(C16 H36 N), 4(O0.75),<br>7(O) | ?                   |
| Sum formula            | C76 H168 I16 N8 O18 W12         | C38 H94 I8 N4 O9 W6 |
| Mr                     | 5718.67                         | 2869.47             |
| Dx, g cm <sup>-3</sup> | 2.885                           | 2.895               |
| Z                      | 1                               | 2                   |
| Mu (mm <sup>-1</sup> ) | 14.235                          | 14.235              |
| F000                   | 2560.0                          | 2580.0              |
| F000'                  | 2544.48                         |                     |
| h,k,lmax               | 12,20,28                        | 12,20,28            |
| Nref                   | 7555                            | 7549                |
| Tmin,Tmax              | 0.430,0.491                     | 0.590,0.746         |
| Tmin'                  | 0.179                           |                     |

Correction method= # Reported T Limits: Tmin=0.590 Tmax=0.746  
AbsCorr = MULTI-SCAN

Data completeness= 0.999                      Theta(max)= 27.482

R(reflections)= 0.0308( 6533)              wR2(reflections)= 0.0604( 7549)

S = 1.046                      Npar= 313

---

**test-name\_ALERT\_alert-type\_alert-level.**  
Click on the hyperlinks for more details of the test.

|                   |                                          |       |       |     |             |
|-------------------|------------------------------------------|-------|-------|-----|-------------|
| PLAT306_ALERT_2_B | Isolated Oxygen Atom (H-atoms Missing ?) | ..... |       | 01W | Check       |
| PLAT430_ALERT_2_B | Short Inter D...A Contact                | 01W   | ..02W | .   | 2.80 Ang.   |
|                   |                                          |       | x,y,z | =   | 1_555 Check |
| PLAT430_ALERT_2_B | Short Inter D...A Contact                | 01W   | ..03  | .   | 2.82 Ang.   |
|                   |                                          |       | x,y,z | =   | 1_555 Check |

|                   |                                                  |                |              |
|-------------------|--------------------------------------------------|----------------|--------------|
| PLAT041_ALERT_1_C | Calc. and Reported SumFormula                    | Strings Differ | Please Check |
| PLAT043_ALERT_1_C | Calculated and Reported Mol. Weight Differ by .. | 20.27          | Check        |
| PLAT068_ALERT_1_C | Reported F000 Differs from Calcd (or Missing)... |                | Please Check |
| PLAT241_ALERT_2_C | High 'MainMol' Ueq as Compared to Neighbors of   | 02             | Check        |
| PLAT342_ALERT_3_C | Low Bond Precision on C-C Bonds .....            | 0.01008        | Ang.         |
| PLAT430_ALERT_2_C | Short Inter D...A Contact O1W ..O2 .             | 2.87           | Ang.         |
|                   |                                                  | -1+x,y,z =     | 1_455 Check  |
| PLAT911_ALERT_3_C | Missing FCF Refl Between Thmin & STh/L=          | 0.600          | 4 Report     |
| PLAT971_ALERT_2_C | Check Calcd Resid. Dens. 0.75A                   | From I2        | 2.37 eA-3    |
| PLAT971_ALERT_2_C | Check Calcd Resid. Dens. 0.73A                   | From W2        | 1.93 eA-3    |
| PLAT971_ALERT_2_C | Check Calcd Resid. Dens. 0.69A                   | From I4        | 1.81 eA-3    |
| PLAT972_ALERT_2_C | Check Calcd Resid. Dens. 0.70A                   | From I2        | -2.00 eA-3   |
| PLAT972_ALERT_2_C | Check Calcd Resid. Dens. 0.73A                   | From I4        | -1.84 eA-3   |
| PLAT972_ALERT_2_C | Check Calcd Resid. Dens. 0.65A                   | From W2        | -1.77 eA-3   |
| PLAT975_ALERT_2_C | Check Calcd Resid. Dens. 0.73A                   | From O2W       | 1.13 eA-3    |
| PLAT975_ALERT_2_C | Check Calcd Resid. Dens. 0.63A                   | From O2W       | 1.08 eA-3    |
| PLAT975_ALERT_2_C | Check Calcd Resid. Dens. 0.54A                   | From O2W       | 0.99 eA-3    |
| PLAT975_ALERT_2_C | Check Calcd Resid. Dens. 0.65A                   | From O2W       | 0.90 eA-3    |
| PLAT975_ALERT_2_C | Check Calcd Resid. Dens. 0.69A                   | From O2W       | 0.78 eA-3    |
| PLAT975_ALERT_2_C | Check Calcd Resid. Dens. 0.83A                   | From O1W       | 0.72 eA-3    |
| PLAT976_ALERT_2_C | Check Calcd Resid. Dens. 0.81A                   | From O2        | -0.69 eA-3   |
| PLAT977_ALERT_2_C | Check Negative Difference Density on H2B         |                | -0.32 eA-3   |
| PLAT977_ALERT_2_C | Check Negative Difference Density on H23A        |                | -0.32 eA-3   |

```

FORMU01_ALERT_2_G There is a discrepancy between the atom counts in the
    _chemical_formula_sum and the formula from the _atom_site* data.
    Atom count from _chemical_formula_sum: C38 H94 I8 N4 O9 W6
    Atom count from the _atom_site data:  C38 H84 I8 N4 O9 W6
CELLZ01_ALERT_1_G Difference between formula and atom_site contents detected.
CELLZ01_ALERT_1_G WARNING: H atoms missing from atom site list. Is this intentional?
    From the CIF: _cell_formula_units_Z      2
    From the CIF: _chemical_formula_sum  C38 H94 I8 N4 O9 W6
    TEST: Compare cell contents of formula and atom_site data

    atom      Z*formula    cif sites diff
    C          76.00        76.00    0.00
    H          188.00       168.00   20.00
    I           16.00        16.00    0.00
    N           8.00         8.00     0.00
    O          18.00        18.00     0.00
    W          12.00        12.00     0.00

PLAT003_ALERT_2_G Number of Uiso or Uij Restrained non-H Atoms ...          2 Report
PLAT045_ALERT_1_G Calculated and Reported Z Differ by a Factor ...          0.50 Check
PLAT083_ALERT_2_G SHELXL Second Parameter in WGHT Unusually Large      23.96 Why ?
PLAT178_ALERT_4_G The CIF-Embedded .res File Contains SIMU Records          1 Report

```

|                   |                                                  |    |                |   |              |
|-------------------|--------------------------------------------------|----|----------------|---|--------------|
| PLAT232_ALERT_2_G | Hirshfeld Test Diff (M-X)                        | W1 | --I1           | . | 5.5 s.u.     |
| PLAT232_ALERT_2_G | Hirshfeld Test Diff (M-X)                        | W1 | --I4_a         | . | 5.3 s.u.     |
| PLAT232_ALERT_2_G | Hirshfeld Test Diff (M-X)                        | W2 | --I1           | . | 20.5 s.u.    |
| PLAT232_ALERT_2_G | Hirshfeld Test Diff (M-X)                        | W2 | --I2           | . | 15.0 s.u.    |
| PLAT232_ALERT_2_G | Hirshfeld Test Diff (M-X)                        | W3 | --I3           | . | 5.5 s.u.     |
| PLAT232_ALERT_2_G | Hirshfeld Test Diff (M-X)                        | W3 | --I2_a         | . | 7.3 s.u.     |
| PLAT232_ALERT_2_G | Hirshfeld Test Diff (M-X)                        | W3 | --I4_a         | . | 7.3 s.u.     |
| PLAT300_ALERT_4_G | Atom Site Occupancy of O3W                       |    | Constrained at |   | 0.5 Check    |
| PLAT300_ALERT_4_G | Atom Site Occupancy of O4W                       |    | Constrained at |   | 0.25 Check   |
| PLAT300_ALERT_4_G | Atom Site Occupancy of O2W                       |    | Constrained at |   | 0.75 Check   |
| PLAT302_ALERT_4_G | Anion/Solvent/Minor-Residue Disorder (Resd 3 )   |    |                |   | 100% Note    |
| PLAT302_ALERT_4_G | Anion/Solvent/Minor-Residue Disorder (Resd 5 )   |    |                |   | 100% Note    |
| PLAT304_ALERT_4_G | Non-Integer Number of Atoms in ..... (Resd 3 )   |    |                |   | 0.75 Check   |
| PLAT304_ALERT_4_G | Non-Integer Number of Atoms in ..... (Resd 5 )   |    |                |   | 0.75 Check   |
| PLAT311_ALERT_2_G | Isolated Disordered Oxygen Atom (No H's ?) ..... |    |                |   | O2W Check    |
| PLAT790_ALERT_4_G | Centre of Gravity not Within Unit Cell: Resd. #  |    |                |   | 5 Note       |
|                   | O                                                |    |                |   |              |
| PLAT860_ALERT_3_G | Number of Least-Squares Restraints .....         |    |                |   | 6 Note       |
| PLAT910_ALERT_3_G | Missing # of FCF Reflection(s) Below Theta(Min). |    |                |   | 1 Note       |
| PLAT912_ALERT_4_G | Missing # of FCF Reflections Above STh/L= 0.600  |    |                |   | 1 Note       |
| PLAT913_ALERT_3_G | Missing # of Very Strong Reflections in FCF .... |    |                |   | 1 Note       |
| PLAT933_ALERT_2_G | Number of OMIT Records in Embedded .res File ... |    |                |   | 4 Note       |
| PLAT961_ALERT_5_G | Dataset Contains no Negative Intensities .....   |    |                |   | Please Check |
| PLAT978_ALERT_2_G | Number C-C Bonds with Positive Residual Density. |    |                |   | 0 Info       |

---

0 **ALERT level A** = Most likely a serious problem - resolve or explain  
 3 **ALERT level B** = A potentially serious problem, consider carefully  
 22 **ALERT level C** = Check. Ensure it is not caused by an omission or oversight  
 30 **ALERT level G** = General information/check it is not something unexpected

6 ALERT type 1 CIF construction/syntax error, inconsistent or missing data  
 33 ALERT type 2 Indicator that the structure model may be wrong or deficient  
 5 ALERT type 3 Indicator that the structure quality may be low  
 10 ALERT type 4 Improvement, methodology, query or suggestion  
 1 ALERT type 5 Informative message, check

---

It is advisable to attempt to resolve as many as possible of the alerts in all categories. Often the minor alerts point to easily fixed oversights, errors and omissions in your CIF or refinement strategy, so attention to these fine details can be worthwhile. In order to resolve some of the more serious problems it may be necessary to carry out additional measurements or structure refinements. However, the purpose of your study may justify the reported deviations and the more serious of these should normally be commented upon in the discussion or experimental section of a paper or in the "special\_details" fields of the CIF. checkCIF was carefully designed to identify outliers and unusual parameters, but every test has its limitations and alerts that are not important in a particular case may appear. Conversely, the absence of alerts does not guarantee there are no aspects of the results needing attention. It is up to the individual to critically assess their own results and, if necessary, seek expert advice.

### **Publication of your CIF in IUCr journals**

A basic structural check has been run on your CIF. These basic checks will be run on all CIFs submitted for publication in IUCr journals (*Acta Crystallographica*, *Journal of Applied Crystallography*, *Journal of Synchrotron Radiation*); however, if you intend to submit to *Acta Crystallographica Section C* or *E* or *IUCrData*, you should make sure that full publication checks are run on the final version of your CIF prior to submission.

### **Publication of your CIF in other journals**

Please refer to the *Notes for Authors* of the relevant journal for any special instructions relating to CIF submission.

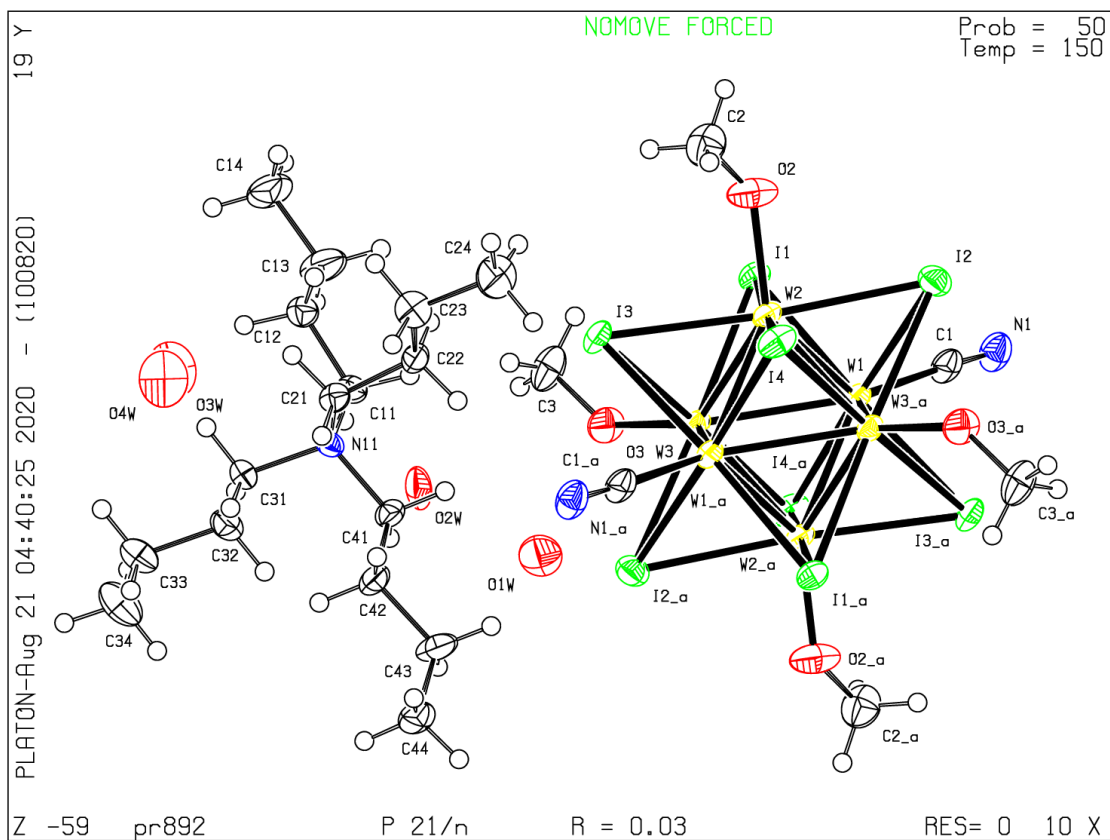

Supplement: s1 [file s1 › Compound 5 checkcif.pdf]
