# Supplementary material for: Cyanide Complexes Based on {Mo6I8}4+ and {W6I8}4+ Cluster Cores
Source: MDPI journal article supplement (doi:10.3390/molecules25245796), 2020-12-08
Supplement: s1 [file s1]

Archive with 9 entries (9 files):
- Compound 2 checkcif.pdf
- Compound 2.cif
- Compound 3 checkcif.pdf
- Compound 3.cif
- Compound 4 checkcif.pdf
- Compound 4.cif
- Compound 5 checkcif.pdf
- Compound 5.cif
- ESI.pdf
