# Supplementary material for: Cyanide Complexes Based on {Mo6I8}4+ and {W6I8}4+ Cluster Cores
Source: MDPI journal article supplement (doi:10.3390/molecules25245796), 2020-12-08
Supplement: s1 [file s1 › Compound 2.cif]

 
data_pr771

_audit_creation_method           SHELXL-2018/3
_shelx_SHELXL_version_number     2018/3
_chemical_name_systematic        ?
_chemical_name_common            ?
_chemical_melting_point          ?
_chemical_formula_moiety         ?
_chemical_formula_sum            'C38 H73.40 I8 Mo6 N8 O0.70'
_chemical_formula_weight         2244.48

loop_
_atom_type_symbol
_atom_type_description
_atom_type_scat_dispersion_real
_atom_type_scat_dispersion_imag
_atom_type_scat_source
C C 0.0033 0.0016 'International Tables Vol C Tables 4.2.6.8 and 6.1.1.4'
H H 0.0000 0.0000 'International Tables Vol C Tables 4.2.6.8 and 6.1.1.4'
N N 0.0061 0.0033 'International Tables Vol C Tables 4.2.6.8 and 6.1.1.4'
O O 0.0106 0.0060 'International Tables Vol C Tables 4.2.6.8 and 6.1.1.4'
I I -0.4742 1.8119 'International Tables Vol C Tables 4.2.6.8 and 6.1.1.4'
Mo Mo -1.6832 0.6857 'International Tables Vol C Tables 4.2.6.8 and 6.1.1.4'

_space_group_crystal_system      monoclinic
_space_group_IT_number           15
_space_group_name_H-M_alt        'C 2/c'
_space_group_name_Hall           '-C 2yc'

_shelx_space_group_comment       
;
The symmetry employed for this shelxl refinement is uniquely defined
by the following loop, which should always be used as a source of
symmetry information in preference to the above space-group names.
They are only intended as comments.
;

loop_
_space_group_symop_operation_xyz
'x, y, z'
'-x, y, -z+1/2'
'x+1/2, y+1/2, z'
'-x+1/2, y+1/2, -z+1/2'
'-x, -y, -z'
'x, -y, z-1/2'
'-x+1/2, -y+1/2, -z'
'x+1/2, -y+1/2, z-1/2'

_cell_length_a                   37.2726(6)
_cell_length_b                   24.8482(5)
_cell_length_c                   28.2845(5)
_cell_angle_alpha                90
_cell_angle_beta                 111.997(2)
_cell_angle_gamma                90
_cell_volume                     24288.9(8)
_cell_formula_units_Z            16
_cell_measurement_temperature    140(2)
_cell_measurement_reflns_used    23387
_cell_measurement_theta_min      2.57
_cell_measurement_theta_max      28.74

_exptl_crystal_description       block
_exptl_crystal_colour            orange
_exptl_crystal_density_meas      ?
_exptl_crystal_density_method    ?
_exptl_crystal_density_diffrn    2.455
_exptl_crystal_F_000             16624
_exptl_transmission_factor_min   ?
_exptl_transmission_factor_max   ?
_exptl_crystal_size_max          0.18
_exptl_crystal_size_mid          0.10
_exptl_crystal_size_min          0.09
_exptl_absorpt_coefficient_mu    5.303
_shelx_estimated_absorpt_T_min   0.449
_shelx_estimated_absorpt_T_max   0.647
_exptl_absorpt_correction_type   multi-scan
_exptl_absorpt_correction_T_min  0.90292
_exptl_absorpt_correction_T_max  1.00000
_exptl_absorpt_process_details   
;
CrysAlisPro 1.171.39.46 (Rigaku Oxford Diffraction, 2015)
Empirical absorption correction using spherical harmonics,
implemented in SCALE3 ABSPACK scaling algorithm.
;
_exptl_absorpt_special_details   ?

_diffrn_radiation_probe          x-ray
_diffrn_radiation_source         'fine-focus sealed tube'
_diffrn_radiation_monochromator  graphite
_diffrn_measurement_device       'four-circle diffractometer'
_diffrn_detector                 'CCD plate'
_diffrn_detector_type            AtlasS2
_diffrn_ambient_temperature      140(2)
_diffrn_radiation_wavelength     0.71073
_diffrn_radiation_type           MoK\a
_diffrn_source                   'sealed X-ray tube'
_diffrn_measurement_device_type  'New Xcalibur, AtlasS2'
_diffrn_measurement_method       '\w scans'
_diffrn_detector_area_resol_mean 10.6
_diffrn_reflns_number            57969
_diffrn_reflns_av_unetI/netI     0.0417
_diffrn_reflns_av_R_equivalents  0.0314
_diffrn_reflns_limit_h_min       -43
_diffrn_reflns_limit_h_max       44
_diffrn_reflns_limit_k_min       -29
_diffrn_reflns_limit_k_max       24
_diffrn_reflns_limit_l_min       -34
_diffrn_reflns_limit_l_max       22
_diffrn_reflns_theta_min         1.949
_diffrn_reflns_theta_max         25.349
_diffrn_reflns_theta_full        25.242
_diffrn_measured_fraction_theta_max 0.999
_diffrn_measured_fraction_theta_full 0.999
_diffrn_reflns_Laue_measured_fraction_max 0.999
_diffrn_reflns_Laue_measured_fraction_full 0.999
_diffrn_reflns_point_group_measured_fraction_max 0.999
_diffrn_reflns_point_group_measured_fraction_full 0.999
_reflns_number_total             22210
_reflns_number_gt                16412
_reflns_threshold_expression     'I > 2\s(I)'
_reflns_Friedel_coverage         0.000
_reflns_Friedel_fraction_max     .
_reflns_Friedel_fraction_full    .

_reflns_special_details          
;
 Reflections were merged by SHELXL according to the crystal
 class for the calculation of statistics and refinement.
 
 _reflns_Friedel_fraction is defined as the number of unique
 Friedel pairs measured divided by the number that would be
 possible theoretically, ignoring centric projections and
 systematic absences.
;
_computing_data_collection       'CrysAlisPro 1.171.39.46 (Rigaku OD, 2015)'
_computing_cell_refinement       'CrysAlisPro 1.171.39.46 (Rigaku OD, 2015)'
_computing_data_reduction        'CrysAlisPro 1.171.39.46 (Rigaku OD, 2015)'
_computing_structure_solution    'SHELXT-2018 (Sheldrick, 2015)'
_computing_structure_refinement  'SHELXL-2018 (Sheldrick, 2015)'
_computing_molecular_graphics    'ShelXle (H\"ubschle, 2011)'
_computing_publication_material  'CIFTAB (Sheldrick, 2015)'

_refine_special_details          ?
_refine_ls_structure_factor_coef Fsqd
_refine_ls_matrix_type           full
_refine_ls_weighting_scheme      calc
_refine_ls_weighting_details     
'w=1/[\s^2^(Fo^2^)+(0.0413P)^2^+122.3000P] where P=(Fo^2^+2Fc^2^)/3'
_atom_sites_solution_primary     dual
_atom_sites_solution_secondary   difmap
_atom_sites_solution_hydrogens   geom
_refine_ls_hydrogen_treatment    constr
_refine_ls_extinction_method     none
_refine_ls_extinction_coef       .
_refine_ls_number_reflns         22210
_refine_ls_number_parameters     1188
_refine_ls_number_restraints     619
_refine_ls_R_factor_all          0.0647
_refine_ls_R_factor_gt           0.0393
_refine_ls_wR_factor_ref         0.0979
_refine_ls_wR_factor_gt          0.0890
_refine_ls_goodness_of_fit_ref   1.053
_refine_ls_restrained_S_all      1.066
_refine_ls_shift/su_max          0.002
_refine_ls_shift/su_mean         0.000

loop_
_atom_site_label
_atom_site_type_symbol
_atom_site_fract_x
_atom_site_fract_y
_atom_site_fract_z
_atom_site_U_iso_or_equiv
_atom_site_adp_type
_atom_site_occupancy
_atom_site_site_symmetry_order
_atom_site_calc_flag
_atom_site_refinement_flags_posn
_atom_site_refinement_flags_adp
_atom_site_refinement_flags_occupancy
_atom_site_disorder_assembly
_atom_site_disorder_group
Mo11 Mo 0.39837(2) 0.39531(3) 0.32843(2) 0.02009(14) Uani 1 1 d . . . . .
Mo12 Mo 0.42956(2) 0.48246(3) 0.30336(2) 0.02050(14) Uani 1 1 d . . . . .
Mo13 Mo 0.40826(2) 0.39835(3) 0.23905(2) 0.02010(14) Uani 1 1 d . . . . .
Mo14 Mo 0.33686(2) 0.40310(3) 0.24081(2) 0.01982(14) Uani 1 1 d . . . . .
Mo15 Mo 0.35783(2) 0.48702(3) 0.30473(2) 0.02135(14) Uani 1 1 d . . . . .
Mo16 Mo 0.36809(2) 0.49048(3) 0.21605(2) 0.02115(14) Uani 1 1 d . . . . .
I11 I 0.37708(2) 0.30658(2) 0.26430(2) 0.02465(11) Uani 1 1 d . . . . .
I12 I 0.38925(2) 0.57896(2) 0.28079(2) 0.02899(12) Uani 1 1 d . . . . .
I13 I 0.47265(2) 0.38874(2) 0.32794(2) 0.02550(11) Uani 1 1 d . . . . .
I14 I 0.29321(2) 0.49662(2) 0.21469(2) 0.02689(12) Uani 1 1 d . . . . .
I15 I 0.44146(2) 0.48703(2) 0.21249(2) 0.02641(12) Uani 1 1 d . . . . .
I16 I 0.32464(2) 0.39823(2) 0.33137(2) 0.02629(12) Uani 1 1 d . . . . .
I17 I 0.42074(2) 0.48046(2) 0.39619(2) 0.02712(12) Uani 1 1 d . . . . .
I18 I 0.34510(2) 0.40517(2) 0.14751(2) 0.02709(12) Uani 1 1 d . . . . .
C11 C 0.41519(19) 0.3414(3) 0.3947(3) 0.0301(18) Uani 1 1 d . . . . .
C12 C 0.4827(2) 0.5285(3) 0.3382(3) 0.0321(19) Uani 1 1 d . . . . .
C13 C 0.4348(2) 0.3472(3) 0.1986(3) 0.0284(17) Uani 1 1 d . . . . .
C14 C 0.2838(2) 0.3565(3) 0.2049(3) 0.0271(17) Uani 1 1 d . . . . .
C15 C 0.3281(2) 0.5383(3) 0.3413(3) 0.0274(17) Uani 1 1 d . . . . .
C16 C 0.3528(2) 0.5469(4) 0.1518(3) 0.034(2) Uani 1 1 d . . . . .
N11 N 0.42367(19) 0.3151(3) 0.4301(3) 0.0403(17) Uani 1 1 d . . . . .
N12 N 0.51067(19) 0.5534(3) 0.3559(3) 0.0411(18) Uani 1 1 d . . . . .
N13 N 0.44604(18) 0.3206(3) 0.1741(3) 0.0409(18) Uani 1 1 d . . . . .
N14 N 0.25598(17) 0.3322(3) 0.1855(3) 0.0371(17) Uani 1 1 d . . . . .
N15 N 0.31221(18) 0.5653(3) 0.3601(3) 0.0359(16) Uani 1 1 d . . . . .
N16 N 0.34742(19) 0.5785(3) 0.1205(3) 0.0463(19) Uani 1 1 d . . . . .
Mo21 Mo 0.16734(2) 0.41318(3) 0.27459(2) 0.02361(15) Uani 1 1 d . . . . .
Mo22 Mo 0.15330(2) 0.49698(3) 0.21080(2) 0.02060(14) Uani 1 1 d . . . . .
Mo23 Mo 0.10683(2) 0.41099(3) 0.18520(2) 0.02296(15) Uani 1 1 d . . . . .
Mo24 Mo 0.08098(2) 0.50361(3) 0.20901(2) 0.02098(14) Uani 1 1 d . . . . .
Mo25 Mo 0.09514(2) 0.41955(3) 0.27294(2) 0.02380(15) Uani 1 1 d . . . . .
Mo26 Mo 0.14148(2) 0.50567(3) 0.29845(2) 0.02217(14) Uani 1 1 d . . . . .
I21 I 0.09181(2) 0.49617(2) 0.11743(2) 0.02789(12) Uani 1 1 d . . . . .
I22 I 0.06670(2) 0.51421(2) 0.29795(2) 0.02918(12) Uani 1 1 d . . . . .
I23 I 0.18113(2) 0.40245(2) 0.18564(2) 0.02913(12) Uani 1 1 d . . . . .
I24 I 0.03167(2) 0.41636(2) 0.18247(2) 0.02949(12) Uani 1 1 d . . . . .
I25 I 0.15642(2) 0.42035(2) 0.36630(2) 0.03257(13) Uani 1 1 d . . . . .
I26 I 0.12125(2) 0.32247(2) 0.24952(2) 0.03387(13) Uani 1 1 d . . . . .
I27 I 0.21719(2) 0.50080(2) 0.30195(2) 0.02787(12) Uani 1 1 d . . . . .
I28 I 0.12750(2) 0.59403(2) 0.23372(2) 0.02614(11) Uani 1 1 d . . . . .
C21 C 0.2167(2) 0.3603(4) 0.3128(3) 0.039(2) Uani 1 1 d . . . . .
C22 C 0.18737(19) 0.5410(3) 0.1755(3) 0.0267(17) Uani 1 1 d . . . . .
C23 C 0.0864(2) 0.3570(3) 0.1188(3) 0.0316(18) Uani 1 1 d . . . . .
C24 C 0.0310(2) 0.5558(3) 0.1713(3) 0.0321(19) Uani 1 1 d . . . . .
C25 C 0.0627(2) 0.3740(3) 0.3098(3) 0.037(2) Uani 1 1 d . . . . .
C26 C 0.1624(2) 0.5576(3) 0.3664(3) 0.0328(19) Uani 1 1 d . . . . .
N21 N 0.2421(2) 0.3325(3) 0.3336(3) 0.055(2) Uani 1 1 d . . . . .
N22 N 0.20529(18) 0.5647(3) 0.1573(3) 0.0366(17) Uani 1 1 d . . . . .
N23 N 0.07527(19) 0.3304(3) 0.0835(3) 0.0435(19) Uani 1 1 d . . . . .
N24 N 0.00557(18) 0.5840(3) 0.1520(3) 0.0443(19) Uani 1 1 d . . . . .
N25 N 0.0468(2) 0.3500(3) 0.3304(3) 0.057(2) Uani 1 1 d . . . . .
N26 N 0.17429(19) 0.5817(3) 0.4031(3) 0.050(2) Uani 1 1 d . . . . .
N1 N 0.59053(15) 0.1568(3) 0.4439(2) 0.0261(14) Uani 1 1 d . . . . .
C111 C 0.55262(19) 0.1813(3) 0.4411(3) 0.0277(17) Uani 1 1 d . . . . .
H11A H 0.547760 0.169956 0.471691 0.033 Uiso 1 1 calc R U . . .
H11B H 0.531660 0.165949 0.411004 0.033 Uiso 1 1 calc R U . . .
C112 C 0.5498(2) 0.2423(3) 0.4374(3) 0.036(2) Uani 1 1 d . . . . .
H11C H 0.559228 0.255136 0.410955 0.043 Uiso 1 1 calc R U . . .
H11D H 0.566188 0.258487 0.470392 0.043 Uiso 1 1 calc R U . . .
C113 C 0.5075(2) 0.2595(4) 0.4235(3) 0.040(2) Uani 1 1 d . . . . .
H11E H 0.497690 0.243336 0.448381 0.048 Uiso 1 1 calc R U . . .
H11F H 0.506493 0.299091 0.426649 0.048 Uiso 1 1 calc R U . . .
C114 C 0.4816(2) 0.2435(4) 0.3712(3) 0.046(2) Uani 1 1 d . . . . .
H11G H 0.456091 0.260033 0.363062 0.069 Uiso 1 1 calc R U . . .
H11H H 0.478840 0.204203 0.369493 0.069 Uiso 1 1 calc R U . . .
H11I H 0.492689 0.255567 0.346685 0.069 Uiso 1 1 calc R U . . .
C121 C 0.60209(19) 0.1773(3) 0.4010(3) 0.0291(18) Uani 1 1 d . . . . .
H12A H 0.610867 0.215089 0.408464 0.035 Uiso 1 1 calc R U . . .
H12B H 0.624360 0.155890 0.400592 0.035 Uiso 1 1 calc R U . . .
C122 C 0.5704(2) 0.1751(3) 0.3483(3) 0.0270(17) Uani 1 1 d . . . . .
H12C H 0.549195 0.200016 0.346598 0.032 Uiso 1 1 calc R U . . .
H12D H 0.559651 0.138262 0.341223 0.032 Uiso 1 1 calc R U . . .
C123 C 0.5871(2) 0.1912(3) 0.3085(3) 0.0290(18) Uani 1 1 d . . . . .
H12E H 0.598935 0.227404 0.316803 0.035 Uiso 1 1 calc R U . . .
H12F H 0.607666 0.165475 0.309636 0.035 Uiso 1 1 calc R U . . .
C124 C 0.5562(2) 0.1920(3) 0.2552(3) 0.037(2) Uani 1 1 d . . . . .
H12G H 0.568223 0.199855 0.230476 0.055 Uiso 1 1 calc R U . . .
H12H H 0.537049 0.219747 0.253101 0.055 Uiso 1 1 calc R U . . .
H12I H 0.543514 0.156756 0.247542 0.055 Uiso 1 1 calc R U . . .
C131 C 0.5850(2) 0.0962(3) 0.4382(3) 0.0316(17) Uani 1 1 d . U . . .
H13A H 0.562636 0.088910 0.406304 0.038 Uiso 1 1 calc R U . . .
H13B H 0.608192 0.080563 0.434291 0.038 Uiso 1 1 calc R U . . .
C132 C 0.5786(3) 0.0674(4) 0.4813(3) 0.045(2) Uani 1 1 d . U . . .
H13C H 0.562147 0.089902 0.494039 0.054 Uiso 1 1 calc R U . . .
H13D H 0.603715 0.061843 0.509765 0.054 Uiso 1 1 calc R U . . .
C133 C 0.5592(4) 0.0136(4) 0.4637(4) 0.076(3) Uani 1 1 d . U . . .
H13E H 0.554266 -0.002757 0.492638 0.091 Uiso 1 1 calc R U . . .
H13F H 0.533652 0.020519 0.436426 0.091 Uiso 1 1 calc R U . . .
C134 C 0.5790(4) -0.0256(5) 0.4449(5) 0.106(4) Uani 1 1 d . U . . .
H13G H 0.561430 -0.055415 0.429007 0.158 Uiso 1 1 calc R U . . .
H13H H 0.601520 -0.039358 0.473348 0.158 Uiso 1 1 calc R U . . .
H13I H 0.587645 -0.008759 0.419688 0.158 Uiso 1 1 calc R U . . .
C141 C 0.62204(19) 0.1715(4) 0.4948(3) 0.038(2) Uani 1 1 d . U . . .
H14A H 0.623431 0.211222 0.497965 0.045 Uiso 1 1 calc R U . . .
H14B H 0.614687 0.157384 0.522651 0.045 Uiso 1 1 calc R U . . .
C142 C 0.6619(2) 0.1502(4) 0.5018(3) 0.053(2) Uani 1 1 d . U . . .
H14C H 0.660337 0.110832 0.495864 0.063 Uiso 1 1 calc R U . . .
H14D H 0.670680 0.167076 0.476348 0.063 Uiso 1 1 calc R U . . .
C143 C 0.6909(2) 0.1618(5) 0.5549(4) 0.067(3) Uani 1 1 d . U . . .
H14E H 0.683426 0.142011 0.580165 0.081 Uiso 1 1 calc R U . . .
H14F H 0.690534 0.200785 0.562079 0.081 Uiso 1 1 calc R U . . .
C144 C 0.7315(3) 0.1453(5) 0.5602(4) 0.089(3) Uani 1 1 d . U . . .
H14G H 0.750233 0.159674 0.592188 0.134 Uiso 1 1 calc R U . . .
H14H H 0.737079 0.159718 0.531447 0.134 Uiso 1 1 calc R U . . .
H14I H 0.733276 0.105987 0.560418 0.134 Uiso 1 1 calc R U . . .
N2 N 0.52645(18) 0.7381(3) 0.4216(3) 0.0383(17) Uani 1 1 d . . . . .
C211 C 0.5229(3) 0.7775(5) 0.4596(5) 0.073(3) Uani 1 1 d . . . . .
H21A H 0.497340 0.772206 0.462096 0.088 Uiso 1 1 calc R U . . .
H21B H 0.542843 0.768620 0.493360 0.088 Uiso 1 1 calc R U . . .
C212 C 0.5268(4) 0.8341(5) 0.4495(6) 0.089(4) Uani 1 1 d . . . . .
H21C H 0.509352 0.842197 0.414083 0.107 Uiso 1 1 calc R U . . .
H21D H 0.553624 0.840802 0.452144 0.107 Uiso 1 1 calc R U . . .
C213 C 0.5175(3) 0.8727(5) 0.4854(5) 0.076(4) Uani 1 1 d . . . . .
H21E H 0.515497 0.909672 0.471488 0.092 Uiso 1 1 calc R U . . .
H21F H 0.491910 0.863121 0.486093 0.092 Uiso 1 1 calc R U . . .
C214 C 0.5459(4) 0.8727(7) 0.5374(6) 0.129(6) Uani 1 1 d . . . . .
H21G H 0.539571 0.901097 0.557051 0.193 Uiso 1 1 calc R U . . .
H21H H 0.571708 0.879174 0.537017 0.193 Uiso 1 1 calc R U . . .
H21I H 0.545525 0.837690 0.553244 0.193 Uiso 1 1 calc R U . . .
C221 C 0.4931(3) 0.7431(4) 0.3706(4) 0.070(3) Uani 1 1 d D U . . .
H22A H 0.468854 0.744540 0.377182 0.084 Uiso 1 1 calc R U . . .
H22B H 0.495770 0.778038 0.355485 0.084 Uiso 1 1 calc R U . . .
C222 C 0.4885(3) 0.7009(5) 0.3319(3) 0.081(3) Uani 1 1 d D U . . .
H22C H 0.486486 0.665462 0.346742 0.097 Uiso 1 1 calc R U . . .
H22D H 0.512046 0.700215 0.323512 0.097 Uiso 1 1 calc R U . . .
C223 C 0.4541(3) 0.7083(5) 0.2839(4) 0.082(3) Uani 1 1 d D U . . .
C224 C 0.4503(5) 0.6700(7) 0.2425(5) 0.093(4) Uani 0.7 1 d D U P A 1
H22E H 0.429972 0.682285 0.210936 0.140 Uiso 0.7 1 calc R U P A 1
H22F H 0.443548 0.634367 0.251607 0.140 Uiso 0.7 1 calc R U P A 1
H22G H 0.474933 0.667714 0.237559 0.140 Uiso 0.7 1 calc R U P A 1
C225 C 0.4645(9) 0.7531(10) 0.2574(12) 0.073(6) Uani 0.3 1 d D U P A 2
H22H H 0.450336 0.749552 0.220595 0.109 Uiso 0.3 1 calc R U P A 2
H22I H 0.492346 0.752433 0.264998 0.109 Uiso 0.3 1 calc R U P A 2
H22J H 0.457545 0.787313 0.269134 0.109 Uiso 0.3 1 calc R U P A 2
C231 C 0.5283(4) 0.6820(5) 0.4438(4) 0.096(4) Uani 1 1 d . U . . .
H23A H 0.533568 0.656866 0.419987 0.116 Uiso 1 1 calc R U . . .
H23B H 0.551392 0.681152 0.475938 0.116 Uiso 1 1 calc R U . . .
C232 C 0.4975(4) 0.6601(5) 0.4547(5) 0.099(3) Uani 1 1 d . U . . .
H23C H 0.474402 0.658046 0.422635 0.119 Uiso 1 1 calc R U . . .
H23D H 0.491286 0.684782 0.478048 0.119 Uiso 1 1 calc R U . . .
C233 C 0.5059(4) 0.6031(5) 0.4793(5) 0.099(3) Uani 1 1 d . U . . .
H23E H 0.506370 0.577389 0.452796 0.119 Uiso 1 1 calc R U . . .
H23F H 0.532279 0.603634 0.506058 0.119 Uiso 1 1 calc R U . . .
C234 C 0.4829(4) 0.5844(6) 0.4993(5) 0.113(4) Uani 1 1 d . U . . .
H23G H 0.486621 0.545415 0.503993 0.170 Uiso 1 1 calc R U . . .
H23H H 0.456101 0.591854 0.476834 0.170 Uiso 1 1 calc R U . . .
H23J H 0.488302 0.601547 0.532487 0.170 Uiso 1 1 calc R U . . .
C241 C 0.5644(3) 0.7463(6) 0.4146(5) 0.100(4) Uani 1 1 d D U . . .
H24A H 0.567839 0.715074 0.394964 0.120 Uiso 1 1 calc R U . . .
H24B H 0.561161 0.778319 0.392572 0.120 Uiso 1 1 calc R U . . .
C242 C 0.6012(3) 0.7533(7) 0.4585(5) 0.124(4) Uani 1 1 d D U . . .
C243 C 0.6297(9) 0.7812(14) 0.4415(12) 0.133(5) Uani 0.5 1 d D U P B 1
H24C H 0.620082 0.818286 0.431434 0.160 Uiso 0.5 1 calc R U P B 1
H24D H 0.654212 0.784304 0.471453 0.160 Uiso 0.5 1 calc R U P B 1
C244 C 0.6389(7) 0.7578(14) 0.3992(11) 0.135(6) Uani 0.5 1 d D U P B 1
H24E H 0.666115 0.764672 0.405029 0.202 Uiso 0.5 1 calc R U P B 1
H24F H 0.622373 0.774238 0.366878 0.202 Uiso 0.5 1 calc R U P B 1
H24G H 0.634303 0.718848 0.397687 0.202 Uiso 0.5 1 calc R U P B 1
C245 C 0.6361(7) 0.7681(14) 0.4485(14) 0.134(5) Uani 0.5 1 d D U P B 2
H24H H 0.651953 0.735091 0.453144 0.161 Uiso 0.5 1 calc R U P B 2
H24I H 0.627465 0.778057 0.412081 0.161 Uiso 0.5 1 calc R U P B 2
C246 C 0.6620(8) 0.8112(13) 0.4780(13) 0.144(6) Uani 0.5 1 d D U P B 2
H24J H 0.684678 0.813269 0.468581 0.216 Uiso 0.5 1 calc R U P B 2
H24K H 0.670266 0.803354 0.514526 0.216 Uiso 0.5 1 calc R U P B 2
H24L H 0.648141 0.845619 0.470563 0.216 Uiso 0.5 1 calc R U P B 2
N3 N 0.24007(18) 0.1939(3) 0.2466(3) 0.0440(19) Uani 1 1 d . . . . .
C311 C 0.2077(2) 0.2299(4) 0.2133(4) 0.058(3) Uani 1 1 d . . . . .
H31A H 0.218582 0.255731 0.195458 0.069 Uiso 1 1 calc R U . . .
H31B H 0.197773 0.251024 0.235446 0.069 Uiso 1 1 calc R U . . .
C312 C 0.1738(3) 0.2002(5) 0.1733(5) 0.079(4) Uani 1 1 d . . . . .
H31C H 0.184329 0.172624 0.156826 0.095 Uiso 1 1 calc R U . . .
H31D H 0.159171 0.181061 0.191156 0.095 Uiso 1 1 calc R U . . .
C313 C 0.1468(4) 0.2338(5) 0.1337(5) 0.083(4) Uani 1 1 d . . . . .
H31E H 0.161313 0.253829 0.116312 0.099 Uiso 1 1 calc R U . . .
H31F H 0.135306 0.260569 0.149844 0.099 Uiso 1 1 calc R U . . .
C314 C 0.1147(3) 0.2028(5) 0.0945(5) 0.093(4) Uani 1 1 d . . . . .
H31G H 0.096059 0.227911 0.071404 0.139 Uiso 1 1 calc R U . . .
H31H H 0.101667 0.180245 0.111600 0.139 Uiso 1 1 calc R U . . .
H31I H 0.125529 0.179854 0.074889 0.139 Uiso 1 1 calc R U . . .
C321 C 0.2709(3) 0.2296(4) 0.2826(4) 0.052(3) Uani 1 1 d . . . . .
H32A H 0.260196 0.247717 0.305659 0.063 Uiso 1 1 calc R U . . .
H32B H 0.277439 0.257895 0.262513 0.063 Uiso 1 1 calc R U . . .
C322 C 0.3079(2) 0.2001(4) 0.3148(4) 0.063(3) Uani 1 1 d . . . . .
H32C H 0.300994 0.166155 0.327724 0.076 Uiso 1 1 calc R U . . .
H32D H 0.322528 0.190666 0.293120 0.076 Uiso 1 1 calc R U . . .
C323 C 0.3336(3) 0.2337(4) 0.3598(4) 0.064(3) Uani 1 1 d . . . . .
H32E H 0.341359 0.267182 0.347221 0.077 Uiso 1 1 calc R U . . .
H32F H 0.319025 0.243822 0.381456 0.077 Uiso 1 1 calc R U . . .
C324 C 0.3687(4) 0.2025(6) 0.3906(6) 0.122(6) Uani 1 1 d . . . . .
H32G H 0.382261 0.221029 0.422988 0.183 Uiso 1 1 calc R U . . .
H32H H 0.385911 0.199399 0.371683 0.183 Uiso 1 1 calc R U . . .
H32I H 0.361039 0.166450 0.397352 0.183 Uiso 1 1 calc R U . . .
C331 C 0.2564(3) 0.1594(4) 0.2144(4) 0.060(3) Uani 1 1 d D U . . .
H33A H 0.278721 0.138244 0.237141 0.072 Uiso 1 1 calc R U . . .
H33B H 0.236383 0.133847 0.193481 0.072 Uiso 1 1 calc R U . . .
C332 C 0.2691(3) 0.1936(5) 0.1804(5) 0.091(3) Uani 1 1 d D U . . .
C333 C 0.2866(5) 0.1718(6) 0.1462(6) 0.099(4) Uani 0.7 1 d D U P C 1
H33C H 0.267274 0.149222 0.120021 0.119 Uiso 0.7 1 calc R U P C 1
H33D H 0.308605 0.148430 0.165890 0.119 Uiso 0.7 1 calc R U P C 1
C334 C 0.3044(6) 0.2129(18) 0.1744(6) 0.096(5) Uani 0.3 1 d D U P C 2
H33E H 0.326239 0.188983 0.193638 0.116 Uiso 0.3 1 calc R U P C 2
H33F H 0.310581 0.249482 0.189039 0.116 Uiso 0.3 1 calc R U P C 2
C335 C 0.3005(4) 0.2144(6) 0.1203(5) 0.094(3) Uani 1 1 d D U . . .
C341 C 0.2248(3) 0.1550(4) 0.2761(5) 0.074(3) Uani 1 1 d D U . . .
H34A H 0.207819 0.128389 0.252020 0.089 Uiso 1 1 calc R U . . .
H34B H 0.246886 0.135233 0.300901 0.089 Uiso 1 1 calc R U . . .
C342 C 0.2026(4) 0.1811(6) 0.3042(6) 0.110(4) Uani 1 1 d D U . . .
C343 C 0.2190(6) 0.1834(11) 0.3603(6) 0.131(5) Uani 0.6 1 d D U P D 1
H34C H 0.241624 0.207838 0.372264 0.157 Uiso 0.6 1 calc R U P D 1
H34D H 0.227352 0.147203 0.374783 0.157 Uiso 0.6 1 calc R U P D 1
C344 C 0.1878(7) 0.2040(11) 0.3761(10) 0.135(6) Uani 0.6 1 d D U P D 1
H34E H 0.198519 0.230835 0.403099 0.202 Uiso 0.6 1 calc R U P D 1
H34F H 0.176771 0.174124 0.388764 0.202 Uiso 0.6 1 calc R U P D 1
H34G H 0.167534 0.220629 0.346725 0.202 Uiso 0.6 1 calc R U P D 1
C345 C 0.2026(9) 0.1511(14) 0.3491(9) 0.127(5) Uani 0.4 1 d D U P D 2
H34H H 0.197569 0.112470 0.340907 0.152 Uiso 0.4 1 calc R U P D 2
H34I H 0.182321 0.165277 0.360465 0.152 Uiso 0.4 1 calc R U P D 2
C346 C 0.2414(10) 0.1587(16) 0.3894(9) 0.133(6) Uani 0.4 1 d D U P D 2
H34J H 0.252508 0.123570 0.402796 0.199 Uiso 0.4 1 calc R U P D 2
H34K H 0.239102 0.180427 0.417109 0.199 Uiso 0.4 1 calc R U P D 2
H34L H 0.258249 0.177217 0.375120 0.199 Uiso 0.4 1 calc R U P D 2
N4 N 0.2968(2) 0.4975(4) 0.4881(3) 0.0741(17) Uani 1 1 d . U . . .
C411 C 0.2775(3) 0.4880(5) 0.5268(4) 0.074(2) Uani 1 1 d . U . . .
H41A H 0.286096 0.452623 0.543195 0.089 Uiso 1 1 calc R U . . .
H41B H 0.286932 0.515794 0.553710 0.089 Uiso 1 1 calc R U . . .
C412 C 0.2341(3) 0.4890(6) 0.5057(4) 0.081(2) Uani 1 1 d . U . . .
H41C H 0.223972 0.462097 0.478083 0.097 Uiso 1 1 calc R U . . .
H41D H 0.224819 0.524993 0.491132 0.097 Uiso 1 1 calc R U . . .
C413 C 0.2190(3) 0.4766(6) 0.5478(4) 0.090(3) Uani 1 1 d . U . . .
H41E H 0.229348 0.441217 0.562954 0.109 Uiso 1 1 calc R U . . .
H41F H 0.229025 0.504063 0.574884 0.109 Uiso 1 1 calc R U . . .
C414 C 0.1776(3) 0.4754(7) 0.5305(5) 0.114(4) Uani 1 1 d . U . . .
H41G H 0.169948 0.467234 0.559308 0.172 Uiso 1 1 calc R U . . .
H41H H 0.167472 0.447536 0.504302 0.172 Uiso 1 1 calc R U . . .
H41I H 0.167142 0.510475 0.516133 0.172 Uiso 1 1 calc R U . . .
C421 C 0.3403(3) 0.4990(6) 0.5199(4) 0.077(2) Uani 1 1 d . U . . .
H42A H 0.345253 0.527857 0.545664 0.092 Uiso 1 1 calc R U . . .
H42B H 0.347680 0.464435 0.538502 0.092 Uiso 1 1 calc R U . . .
C422 C 0.3664(3) 0.5081(6) 0.4905(4) 0.084(2) Uani 1 1 d . U . . .
H42C H 0.359589 0.542374 0.471315 0.100 Uiso 1 1 calc R U . . .
H42D H 0.363267 0.478491 0.465847 0.100 Uiso 1 1 calc R U . . .
C423 C 0.4091(3) 0.5103(6) 0.5293(4) 0.090(3) Uani 1 1 d . U . . .
H42E H 0.414036 0.478714 0.552208 0.108 Uiso 1 1 calc R U . . .
H42F H 0.426659 0.507691 0.510360 0.108 Uiso 1 1 calc R U . . .
C424 C 0.4184(3) 0.5608(6) 0.5610(5) 0.100(3) Uani 1 1 d . U . . .
H42G H 0.446049 0.561621 0.582095 0.150 Uiso 1 1 calc R U . . .
H42H H 0.403376 0.561453 0.583000 0.150 Uiso 1 1 calc R U . . .
H42I H 0.411676 0.592329 0.538490 0.150 Uiso 1 1 calc R U . . .
C431 C 0.2872(4) 0.4529(6) 0.4500(5) 0.094(2) Uani 1 1 d D U . . .
H43A H 0.258858 0.452830 0.431033 0.113 Uiso 1 1 calc R U . . .
H43B H 0.299431 0.461055 0.425177 0.113 Uiso 1 1 calc R U . . .
C432 C 0.2991(4) 0.3981(6) 0.4703(6) 0.119(3) Uani 1 1 d D U . . .
C433 C 0.2625(6) 0.3719(8) 0.4661(12) 0.124(3) Uani 0.5 1 d D U P E 1
H43C H 0.255807 0.381558 0.495777 0.148 Uiso 0.5 1 calc R U P E 1
H43D H 0.241205 0.383911 0.434697 0.148 Uiso 0.5 1 calc R U P E 1
C434 C 0.2974(7) 0.3424(7) 0.4515(11) 0.124(3) Uani 0.5 1 d D U P E 2
H43E H 0.322893 0.324719 0.467650 0.149 Uiso 0.5 1 calc R U P E 2
H43F H 0.290369 0.342309 0.414074 0.149 Uiso 0.5 1 calc R U P E 2
C435 C 0.2678(5) 0.3132(7) 0.4646(6) 0.130(4) Uani 1 1 d D U . . .
C441 C 0.2838(3) 0.5492(5) 0.4598(4) 0.084(2) Uani 1 1 d . U . . .
H44A H 0.255247 0.548920 0.443150 0.100 Uiso 1 1 calc R U . . .
H44B H 0.294460 0.551554 0.432601 0.100 Uiso 1 1 calc R U . . .
C442 C 0.2963(4) 0.5993(6) 0.4938(5) 0.104(3) Uani 1 1 d . U . . .
H44C H 0.279832 0.601091 0.514260 0.125 Uiso 1 1 calc R U . . .
H44D H 0.323107 0.592902 0.518028 0.125 Uiso 1 1 calc R U . . .
C443 C 0.2957(5) 0.6506(7) 0.4727(6) 0.127(3) Uani 1 1 d . U . . .
H443 H 0.285619 0.655799 0.436811 0.152 Uiso 1 1 calc R U . . .
C444 C 0.3109(5) 0.6956(7) 0.5076(6) 0.140(4) Uani 1 1 d . U . . .
H44E H 0.301471 0.729551 0.489553 0.210 Uiso 1 1 calc R U . . .
H44F H 0.339255 0.695076 0.520561 0.210 Uiso 1 1 calc R U . . .
H44G H 0.302251 0.692553 0.536240 0.210 Uiso 1 1 calc R U . . .
O1W O 0.5845(3) 0.6146(6) 0.4011(6) 0.073(4) Uani 0.6 1 d . U P F 1
O2W O 0.5733(5) 0.6248(9) 0.3632(9) 0.075(5) Uani 0.4 1 d . U P G 2
O3W O 0.3872(6) 0.3932(9) 0.4835(8) 0.096(7) Uani 0.4 1 d . . P . .

loop_
_atom_site_aniso_label
_atom_site_aniso_U_11
_atom_site_aniso_U_22
_atom_site_aniso_U_33
_atom_site_aniso_U_23
_atom_site_aniso_U_13
_atom_site_aniso_U_12
Mo11 0.0172(3) 0.0251(4) 0.0167(3) -0.0009(3) 0.0049(2) 0.0044(3)
Mo12 0.0155(3) 0.0261(4) 0.0174(3) -0.0026(3) 0.0033(2) 0.0026(2)
Mo13 0.0157(3) 0.0260(4) 0.0185(3) -0.0033(3) 0.0064(2) 0.0009(2)
Mo14 0.0142(3) 0.0261(4) 0.0180(3) -0.0022(3) 0.0048(2) 0.0017(2)
Mo15 0.0177(3) 0.0264(4) 0.0189(3) -0.0024(3) 0.0055(2) 0.0047(3)
Mo16 0.0168(3) 0.0268(4) 0.0175(3) -0.0004(3) 0.0037(2) 0.0011(3)
I11 0.0229(2) 0.0258(3) 0.0258(3) -0.0030(2) 0.00990(18) 0.00231(19)
I12 0.0264(2) 0.0261(3) 0.0308(3) -0.0023(2) 0.0066(2) 0.0030(2)
I13 0.0169(2) 0.0318(3) 0.0247(3) -0.0014(2) 0.00412(18) 0.00576(19)
I14 0.0176(2) 0.0322(3) 0.0272(3) 0.0010(2) 0.00415(18) 0.0059(2)
I15 0.0209(2) 0.0353(3) 0.0235(2) -0.0010(2) 0.00878(18) -0.0024(2)
I16 0.0237(2) 0.0328(3) 0.0257(3) 0.0000(2) 0.01320(19) 0.0040(2)
I17 0.0267(2) 0.0335(3) 0.0182(2) -0.0049(2) 0.00503(18) 0.0043(2)
I18 0.0234(2) 0.0376(3) 0.0178(2) -0.0043(2) 0.00488(18) -0.0023(2)
C11 0.020(4) 0.043(5) 0.025(4) -0.005(4) 0.005(3) 0.007(3)
C12 0.028(4) 0.038(5) 0.029(4) -0.003(4) 0.010(3) 0.009(4)
C13 0.027(4) 0.030(5) 0.030(4) -0.001(4) 0.013(3) -0.003(3)
C14 0.025(4) 0.027(5) 0.033(4) 0.003(4) 0.015(3) 0.007(3)
C15 0.030(4) 0.024(5) 0.026(4) 0.004(4) 0.008(3) 0.002(3)
C16 0.028(4) 0.047(6) 0.025(4) -0.003(4) 0.006(3) -0.006(4)
N11 0.047(4) 0.044(5) 0.025(4) 0.002(4) 0.008(3) 0.006(3)
N12 0.037(4) 0.048(5) 0.036(4) -0.012(4) 0.012(3) -0.001(4)
N13 0.037(4) 0.041(5) 0.051(5) -0.007(4) 0.023(3) -0.004(3)
N14 0.025(3) 0.041(5) 0.041(4) -0.005(4) 0.008(3) -0.001(3)
N15 0.037(4) 0.040(5) 0.033(4) 0.002(3) 0.016(3) 0.012(3)
N16 0.044(4) 0.045(5) 0.039(5) 0.013(4) 0.003(3) -0.002(4)
Mo21 0.0195(3) 0.0272(4) 0.0237(3) 0.0017(3) 0.0076(2) 0.0052(3)
Mo22 0.0173(3) 0.0252(4) 0.0194(3) -0.0021(3) 0.0070(2) 0.0021(3)
Mo23 0.0199(3) 0.0262(4) 0.0227(3) -0.0035(3) 0.0078(2) 0.0013(3)
Mo24 0.0162(3) 0.0263(4) 0.0196(3) -0.0010(3) 0.0058(2) 0.0032(3)
Mo25 0.0203(3) 0.0283(4) 0.0244(3) 0.0022(3) 0.0102(2) 0.0031(3)
Mo26 0.0189(3) 0.0282(4) 0.0185(3) -0.0018(3) 0.0060(2) 0.0033(3)
I21 0.0257(2) 0.0367(3) 0.0192(2) -0.0007(2) 0.00606(19) 0.0021(2)
I22 0.0245(2) 0.0388(3) 0.0275(3) -0.0022(2) 0.0134(2) 0.0060(2)
I23 0.0248(2) 0.0342(3) 0.0315(3) -0.0056(2) 0.0141(2) 0.0047(2)
I24 0.0195(2) 0.0351(3) 0.0320(3) -0.0039(2) 0.00754(19) -0.0025(2)
I25 0.0303(2) 0.0433(3) 0.0228(3) 0.0073(2) 0.0085(2) 0.0073(2)
I26 0.0344(3) 0.0263(3) 0.0418(3) 0.0020(3) 0.0152(2) 0.0032(2)
I27 0.0182(2) 0.0362(3) 0.0260(3) -0.0025(2) 0.00464(18) 0.0017(2)
I28 0.0235(2) 0.0258(3) 0.0284(3) -0.0023(2) 0.00882(19) 0.0022(2)
C21 0.040(5) 0.044(6) 0.037(5) -0.001(4) 0.019(4) 0.004(4)
C22 0.019(3) 0.036(5) 0.023(4) -0.004(4) 0.005(3) 0.003(3)
C23 0.031(4) 0.039(5) 0.027(4) -0.004(4) 0.012(3) 0.001(4)
C24 0.033(4) 0.032(5) 0.037(5) -0.004(4) 0.020(4) 0.000(4)
C25 0.036(4) 0.040(6) 0.036(5) 0.013(4) 0.016(4) 0.014(4)
C26 0.028(4) 0.045(6) 0.024(4) -0.003(4) 0.007(3) 0.012(4)
N21 0.043(4) 0.055(6) 0.062(5) 0.018(5) 0.015(4) 0.025(4)
N22 0.036(4) 0.044(5) 0.034(4) -0.002(4) 0.017(3) -0.006(3)
N23 0.043(4) 0.054(5) 0.042(5) -0.019(4) 0.026(3) -0.011(4)
N24 0.030(4) 0.053(5) 0.044(5) 0.002(4) 0.007(3) 0.012(4)
N25 0.048(4) 0.059(6) 0.074(6) 0.033(5) 0.034(4) 0.015(4)
N26 0.045(4) 0.055(5) 0.039(5) -0.010(4) 0.005(3) 0.015(4)
N1 0.021(3) 0.035(4) 0.021(3) 0.000(3) 0.007(2) 0.003(3)
C111 0.030(4) 0.028(5) 0.028(4) 0.005(4) 0.015(3) 0.000(3)
C112 0.035(4) 0.044(6) 0.027(4) -0.003(4) 0.010(3) -0.003(4)
C113 0.045(5) 0.046(6) 0.030(5) -0.005(4) 0.016(4) 0.014(4)
C114 0.044(5) 0.050(6) 0.038(5) -0.011(5) 0.008(4) 0.008(4)
C121 0.025(4) 0.036(5) 0.026(4) -0.004(4) 0.009(3) -0.011(3)
C122 0.038(4) 0.020(4) 0.029(4) -0.002(4) 0.019(3) -0.008(3)
C123 0.030(4) 0.035(5) 0.019(4) 0.003(4) 0.006(3) 0.005(3)
C124 0.036(4) 0.040(5) 0.032(5) -0.002(4) 0.009(3) 0.001(4)
C131 0.034(4) 0.035(5) 0.028(4) 0.004(4) 0.013(3) 0.003(3)
C132 0.063(5) 0.036(5) 0.037(4) 0.001(4) 0.019(4) -0.002(4)
C133 0.122(7) 0.056(6) 0.054(5) 0.004(5) 0.037(5) -0.010(5)
C134 0.165(9) 0.079(8) 0.077(7) 0.007(7) 0.050(7) -0.018(7)
C141 0.028(4) 0.062(6) 0.020(4) -0.003(4) 0.006(3) 0.000(4)
C142 0.031(4) 0.090(6) 0.031(4) -0.012(4) 0.003(3) 0.006(4)
C143 0.038(4) 0.119(7) 0.037(5) -0.018(5) 0.003(3) 0.014(4)
C144 0.057(5) 0.131(7) 0.063(6) -0.023(5) 0.004(4) 0.022(5)
N2 0.046(4) 0.042(5) 0.030(4) 0.011(4) 0.018(3) 0.005(3)
C211 0.075(7) 0.066(8) 0.089(9) -0.011(7) 0.043(7) -0.017(6)
C212 0.093(9) 0.056(8) 0.147(13) 0.016(8) 0.079(9) 0.003(7)
C213 0.079(8) 0.056(8) 0.110(11) -0.033(7) 0.053(8) -0.022(6)
C214 0.135(13) 0.144(15) 0.121(14) -0.058(12) 0.063(11) -0.089(12)
C221 0.077(6) 0.087(8) 0.044(6) 0.016(5) 0.021(5) 0.000(6)
C222 0.085(6) 0.109(7) 0.049(5) 0.005(5) 0.024(5) -0.001(6)
C223 0.069(5) 0.117(8) 0.048(5) -0.006(5) 0.009(4) -0.007(6)
C224 0.076(8) 0.142(11) 0.049(8) 0.002(8) 0.009(6) -0.043(8)
C225 0.059(10) 0.113(12) 0.047(10) -0.015(10) 0.020(9) 0.005(10)
C231 0.160(10) 0.083(8) 0.041(6) 0.009(6) 0.031(6) -0.036(7)
C232 0.156(8) 0.087(7) 0.050(6) 0.003(5) 0.034(6) -0.045(6)
C233 0.150(9) 0.090(7) 0.052(6) -0.005(6) 0.030(6) -0.041(7)
C234 0.166(10) 0.092(9) 0.063(7) -0.007(7) 0.020(7) -0.034(8)
C241 0.048(5) 0.129(10) 0.123(9) -0.035(8) 0.033(6) 0.000(6)
C242 0.057(5) 0.168(10) 0.135(9) -0.037(8) 0.023(6) -0.003(6)
C243 0.062(7) 0.186(11) 0.143(10) -0.042(9) 0.027(7) 0.008(8)
C244 0.063(8) 0.190(13) 0.147(12) -0.035(11) 0.034(9) 0.009(9)
C245 0.060(7) 0.188(11) 0.144(10) -0.046(9) 0.026(7) 0.011(8)
C246 0.076(9) 0.190(13) 0.151(12) -0.035(11) 0.026(9) 0.004(9)
N3 0.037(4) 0.027(4) 0.065(5) 0.001(4) 0.016(4) -0.001(3)
C311 0.045(5) 0.047(7) 0.074(8) 0.015(6) 0.016(5) 0.002(5)
C312 0.034(5) 0.064(8) 0.123(11) 0.018(8) 0.010(6) -0.011(5)
C313 0.104(9) 0.052(8) 0.074(9) 0.006(7) 0.015(7) -0.006(7)
C314 0.094(9) 0.074(9) 0.079(9) -0.008(8) -0.003(7) -0.010(7)
C321 0.061(6) 0.025(5) 0.068(7) -0.006(5) 0.021(5) -0.003(4)
C322 0.042(5) 0.049(7) 0.086(8) -0.021(6) 0.008(5) -0.005(5)
C323 0.073(7) 0.055(7) 0.053(7) -0.001(6) 0.011(5) -0.004(6)
C324 0.110(11) 0.085(11) 0.130(14) 0.003(10) -0.002(10) -0.020(9)
C331 0.042(5) 0.070(7) 0.071(6) -0.019(5) 0.023(4) -0.004(4)
C332 0.075(5) 0.113(7) 0.094(7) 0.014(6) 0.039(5) 0.010(5)
C333 0.091(7) 0.115(8) 0.094(8) 0.011(7) 0.036(6) 0.025(7)
C334 0.085(7) 0.113(9) 0.095(8) 0.015(8) 0.037(7) 0.020(7)
C335 0.088(6) 0.117(8) 0.093(7) 0.028(7) 0.054(6) 0.018(6)
C341 0.073(6) 0.058(7) 0.113(8) 0.020(6) 0.060(6) 0.006(5)
C342 0.129(8) 0.098(8) 0.131(9) 0.007(7) 0.080(7) -0.002(6)
C343 0.153(10) 0.109(10) 0.151(10) -0.003(9) 0.080(9) -0.005(8)
C344 0.163(11) 0.110(11) 0.152(12) -0.007(10) 0.084(10) -0.002(9)
C345 0.152(10) 0.105(10) 0.147(10) -0.005(9) 0.082(9) -0.003(8)
C346 0.159(12) 0.104(11) 0.152(12) -0.005(11) 0.078(10) 0.001(10)
N4 0.057(3) 0.138(4) 0.035(3) 0.008(3) 0.026(2) 0.011(3)
C411 0.050(3) 0.139(5) 0.037(4) 0.018(4) 0.020(3) 0.010(4)
C412 0.048(4) 0.148(6) 0.046(4) 0.024(4) 0.018(3) 0.010(4)
C413 0.053(4) 0.162(7) 0.057(5) 0.036(5) 0.021(4) 0.008(5)
C414 0.075(6) 0.183(9) 0.077(6) 0.037(7) 0.019(5) 0.007(6)
C421 0.048(3) 0.146(5) 0.039(4) 0.003(4) 0.019(3) 0.014(4)
C422 0.046(4) 0.158(6) 0.046(4) -0.006(4) 0.017(3) 0.016(4)
C423 0.045(4) 0.165(6) 0.058(4) -0.009(5) 0.018(4) 0.015(4)
C424 0.061(5) 0.162(7) 0.071(5) -0.015(5) 0.019(4) 0.002(5)
C431 0.084(4) 0.146(6) 0.053(4) -0.003(4) 0.027(4) 0.004(4)
C432 0.114(5) 0.155(7) 0.081(5) -0.008(5) 0.028(4) -0.002(6)
C433 0.117(6) 0.157(7) 0.088(6) -0.012(6) 0.027(5) -0.002(6)
C434 0.118(6) 0.158(7) 0.087(6) -0.012(6) 0.028(5) -0.003(6)
C435 0.122(6) 0.161(8) 0.095(6) -0.013(6) 0.025(5) -0.006(7)
C441 0.076(4) 0.139(6) 0.043(4) 0.022(4) 0.030(3) 0.006(4)
C442 0.113(5) 0.145(7) 0.059(5) 0.024(5) 0.037(4) 0.004(5)
C443 0.141(6) 0.153(8) 0.077(6) 0.021(5) 0.030(5) -0.015(6)
C444 0.152(8) 0.157(9) 0.090(8) 0.012(7) 0.022(7) -0.024(8)
O1W 0.035(6) 0.076(9) 0.091(10) -0.057(10) 0.004(7) -0.002(6)
O2W 0.037(8) 0.077(10) 0.109(13) -0.046(13) 0.023(9) 0.005(7)
O3W 0.093(14) 0.12(2) 0.070(14) -0.009(13) 0.028(11) 0.039(13)

_geom_special_details            
;
 All esds (except the esd in the dihedral angle between two l.s. planes)
 are estimated using the full covariance matrix.  The cell esds are taken
 into account individually in the estimation of esds in distances, angles
 and torsion angles; correlations between esds in cell parameters are only
 used when they are defined by crystal symmetry.  An approximate (isotropic)
 treatment of cell esds is used for estimating esds involving l.s. planes.
;

loop_
_geom_bond_atom_site_label_1
_geom_bond_atom_site_label_2
_geom_bond_distance
_geom_bond_site_symmetry_2
_geom_bond_publ_flag
Mo11 Mo12 2.6759(9) . ?
Mo11 Mo13 2.6890(8) . ?
Mo11 Mo14 2.6793(8) . ?
Mo11 Mo15 2.6768(9) . ?
Mo11 I11 2.7754(8) . ?
Mo11 I13 2.7787(7) . ?
Mo11 I16 2.7812(7) . ?
Mo11 I17 2.7654(8) . ?
Mo11 C11 2.197(9) . ?
Mo12 Mo13 2.6879(9) . ?
Mo12 Mo15 2.6904(8) . ?
Mo12 Mo16 2.6738(8) . ?
Mo12 I12 2.7741(8) . ?
Mo12 I13 2.7656(8) . ?
Mo12 I15 2.7696(7) . ?
Mo12 I17 2.7658(7) . ?
Mo12 C12 2.177(8) . ?
Mo13 Mo14 2.6830(7) . ?
Mo13 Mo16 2.6788(9) . ?
Mo13 I11 2.7717(8) . ?
Mo13 I13 2.7599(7) . ?
Mo13 I15 2.7654(8) . ?
Mo13 I18 2.7764(7) . ?
Mo13 C13 2.181(8) . ?
Mo14 Mo15 2.6775(9) . ?
Mo14 Mo16 2.6777(9) . ?
Mo14 I11 2.7741(8) . ?
Mo14 I14 2.7732(8) . ?
Mo14 I16 2.7671(7) . ?
Mo14 I18 2.7691(7) . ?
Mo14 C14 2.186(8) . ?
Mo15 Mo16 2.6766(8) . ?
Mo15 I12 2.7646(8) . ?
Mo15 I14 2.7837(7) . ?
Mo15 I16 2.7685(8) . ?
Mo15 I17 2.7698(7) . ?
Mo15 C15 2.185(8) . ?
Mo16 I12 2.7798(8) . ?
Mo16 I14 2.7809(7) . ?
Mo16 I15 2.7753(7) . ?
Mo16 I18 2.7823(8) . ?
Mo16 C16 2.194(9) . ?
C11 N11 1.136(10) . ?
C12 N12 1.153(9) . ?
C13 N13 1.144(9) . ?
C14 N14 1.147(9) . ?
C15 N15 1.150(9) . ?
C16 N16 1.145(10) . ?
Mo21 Mo22 2.6753(9) . ?
Mo21 Mo23 2.6852(8) . ?
Mo21 Mo25 2.6789(8) . ?
Mo21 Mo26 2.6748(9) . ?
Mo21 I23 2.7629(8) . ?
Mo21 I25 2.7779(8) . ?
Mo21 I26 2.7607(8) . ?
Mo21 I27 2.7773(8) . ?
Mo21 C21 2.188(9) . ?
Mo22 Mo23 2.6739(9) . ?
Mo22 Mo24 2.6823(7) . ?
Mo22 Mo26 2.6841(8) . ?
Mo22 I21 2.7739(7) . ?
Mo22 I23 2.7663(8) . ?
Mo22 I27 2.7796(7) . ?
Mo22 I28 2.7619(8) . ?
Mo22 C22 2.181(8) . ?
Mo23 Mo24 2.6768(9) . ?
Mo23 Mo25 2.6842(8) . ?
Mo23 I21 2.7683(8) . ?
Mo23 I23 2.7728(7) . ?
Mo23 I24 2.7767(7) . ?
Mo23 I26 2.7756(8) . ?
Mo23 C23 2.199(8) . ?
Mo24 Mo25 2.6825(9) . ?
Mo24 Mo26 2.6858(8) . ?
Mo24 I21 2.7733(7) . ?
Mo24 I22 2.7720(7) . ?
Mo24 I24 2.7581(8) . ?
Mo24 I28 2.7633(8) . ?
Mo24 C24 2.192(8) . ?
Mo25 Mo26 2.6740(9) . ?
Mo25 I22 2.7782(8) . ?
Mo25 I24 2.7596(7) . ?
Mo25 I25 2.7698(8) . ?
Mo25 I26 2.7727(8) . ?
Mo25 C25 2.186(8) . ?
Mo26 I22 2.7903(7) . ?
Mo26 I25 2.7726(8) . ?
Mo26 I27 2.7887(7) . ?
Mo26 I28 2.7801(8) . ?
Mo26 C26 2.200(8) . ?
C21 N21 1.142(10) . ?
C22 N22 1.146(9) . ?
C23 N23 1.139(9) . ?
C24 N24 1.140(9) . ?
C25 N25 1.140(10) . ?
C26 N26 1.135(10) . ?
N1 C111 1.512(8) . ?
N1 C121 1.521(9) . ?
N1 C131 1.518(10) . ?
N1 C141 1.523(9) . ?
C111 H11A 0.9900 . ?
C111 H11B 0.9900 . ?
C111 C112 1.521(11) . ?
C112 H11C 0.9900 . ?
C112 H11D 0.9900 . ?
C112 C113 1.537(10) . ?
C113 H11E 0.9900 . ?
C113 H11F 0.9900 . ?
C113 C114 1.486(11) . ?
C114 H11G 0.9800 . ?
C114 H11H 0.9800 . ?
C114 H11I 0.9800 . ?
C121 H12A 0.9900 . ?
C121 H12B 0.9900 . ?
C121 C122 1.517(10) . ?
C122 H12C 0.9900 . ?
C122 H12D 0.9900 . ?
C122 C123 1.530(9) . ?
C123 H12E 0.9900 . ?
C123 H12F 0.9900 . ?
C123 C124 1.515(10) . ?
C124 H12G 0.9800 . ?
C124 H12H 0.9800 . ?
C124 H12I 0.9800 . ?
C131 H13A 0.9900 . ?
C131 H13B 0.9900 . ?
C131 C132 1.510(11) . ?
C132 H13C 0.9900 . ?
C132 H13D 0.9900 . ?
C132 C133 1.512(13) . ?
C133 H13E 0.9900 . ?
C133 H13F 0.9900 . ?
C133 C134 1.441(16) . ?
C134 H13G 0.9800 . ?
C134 H13H 0.9800 . ?
C134 H13I 0.9800 . ?
C141 H14A 0.9900 . ?
C141 H14B 0.9900 . ?
C141 C142 1.518(10) . ?
C142 H14C 0.9900 . ?
C142 H14D 0.9900 . ?
C142 C143 1.513(11) . ?
C143 H14E 0.9900 . ?
C143 H14F 0.9900 . ?
C143 C144 1.520(12) . ?
C144 H14G 0.9800 . ?
C144 H14H 0.9800 . ?
C144 H14I 0.9800 . ?
N2 C211 1.495(12) . ?
N2 C221 1.516(12) . ?
N2 C231 1.517(13) . ?
N2 C241 1.515(12) . ?
C211 H21A 0.9900 . ?
C211 H21B 0.9900 . ?
C211 C212 1.454(14) . ?
C212 H21C 0.9900 . ?
C212 H21D 0.9900 . ?
C212 C213 1.527(15) . ?
C213 H21E 0.9900 . ?
C213 H21F 0.9900 . ?
C213 C214 1.456(18) . ?
C214 H21G 0.9800 . ?
C214 H21H 0.9800 . ?
C214 H21I 0.9800 . ?
C221 H22A 0.9900 . ?
C221 H22B 0.9900 . ?
C221 C222 1.480(8) . ?
C222 H22C 0.9900 . ?
C222 H22D 0.9900 . ?
C222 C223 1.488(7) . ?
C223 C224 1.473(8) . ?
C223 C225 1.471(8) . ?
C224 H22E 0.9800 . ?
C224 H22F 0.9800 . ?
C224 H22G 0.9800 . ?
C225 H22H 0.9800 . ?
C225 H22I 0.9800 . ?
C225 H22J 0.9800 . ?
C231 H23A 0.9900 . ?
C231 H23B 0.9900 . ?
C231 C232 1.407(16) . ?
C232 H23C 0.9900 . ?
C232 H23D 0.9900 . ?
C232 C233 1.559(17) . ?
C233 H23E 0.9900 . ?
C233 H23F 0.9900 . ?
C233 C234 1.280(16) . ?
C234 H23G 0.9800 . ?
C234 H23H 0.9800 . ?
C234 H23J 0.9800 . ?
C241 H24A 0.9900 . ?
C241 H24B 0.9900 . ?
C241 C242 1.474(8) . ?
C242 C243 1.490(8) . ?
C242 C245 1.477(8) . ?
C243 H24C 0.9900 . ?
C243 H24D 0.9900 . ?
C243 C244 1.483(9) . ?
C244 H24E 0.9800 . ?
C244 H24F 0.9800 . ?
C244 H24G 0.9800 . ?
C245 H24H 0.9900 . ?
C245 H24I 0.9900 . ?
C245 C246 1.474(9) . ?
C246 H24J 0.9800 . ?
C246 H24K 0.9800 . ?
C246 H24L 0.9800 . ?
N3 C311 1.515(11) . ?
N3 C321 1.506(11) . ?
N3 C331 1.534(11) . ?
N3 C341 1.520(11) . ?
C311 H31A 0.9900 . ?
C311 H31B 0.9900 . ?
C311 C312 1.535(14) . ?
C312 H31C 0.9900 . ?
C312 H31D 0.9900 . ?
C312 C313 1.457(15) . ?
C313 H31E 0.9900 . ?
C313 H31F 0.9900 . ?
C313 C314 1.504(15) . ?
C314 H31G 0.9800 . ?
C314 H31H 0.9800 . ?
C314 H31I 0.9800 . ?
C321 H32A 0.9900 . ?
C321 H32B 0.9900 . ?
C321 C322 1.527(12) . ?
C322 H32C 0.9900 . ?
C322 H32D 0.9900 . ?
C322 C323 1.524(13) . ?
C323 H32E 0.9900 . ?
C323 H32F 0.9900 . ?
C323 C324 1.490(15) . ?
C324 H32G 0.9800 . ?
C324 H32H 0.9800 . ?
C324 H32I 0.9800 . ?
C331 H33A 0.9900 . ?
C331 H33B 0.9900 . ?
C331 C332 1.485(8) . ?
C332 C333 1.461(8) . ?
C332 C334 1.471(8) . ?
C333 H33C 0.9900 . ?
C333 H33D 0.9900 . ?
C333 C335 1.488(8) . ?
C334 H33E 0.9900 . ?
C334 H33F 0.9900 . ?
C334 C335 1.482(8) . ?
C341 H34A 0.9900 . ?
C341 H34B 0.9900 . ?
C341 C342 1.488(8) . ?
C342 C343 1.473(8) . ?
C342 C345 1.473(8) . ?
C343 H34C 0.9900 . ?
C343 H34D 0.9900 . ?
C343 C344 1.483(8) . ?
C344 H34E 0.9800 . ?
C344 H34F 0.9800 . ?
C344 H34G 0.9800 . ?
C345 H34H 0.9900 . ?
C345 H34I 0.9900 . ?
C345 C346 1.480(9) . ?
C346 H34J 0.9800 . ?
C346 H34K 0.9800 . ?
C346 H34L 0.9800 . ?
N4 C411 1.537(11) . ?
N4 C421 1.532(12) . ?
N4 C431 1.492(15) . ?
N4 C441 1.495(15) . ?
C411 H41A 0.9900 . ?
C411 H41B 0.9900 . ?
C411 C412 1.501(13) . ?
C412 H41C 0.9900 . ?
C412 H41D 0.9900 . ?
C412 C413 1.525(13) . ?
C413 H41E 0.9900 . ?
C413 H41F 0.9900 . ?
C413 C414 1.434(14) . ?
C414 H41G 0.9800 . ?
C414 H41H 0.9800 . ?
C414 H41I 0.9800 . ?
C421 H42A 0.9900 . ?
C421 H42B 0.9900 . ?
C421 C422 1.517(13) . ?
C422 H42C 0.9900 . ?
C422 H42D 0.9900 . ?
C422 C423 1.558(13) . ?
C423 H42E 0.9900 . ?
C423 H42F 0.9900 . ?
C423 C424 1.508(17) . ?
C424 H42G 0.9800 . ?
C424 H42H 0.9800 . ?
C424 H42I 0.9800 . ?
C431 H43A 0.9900 . ?
C431 H43B 0.9900 . ?
C431 C432 1.480(8) . ?
C432 C433 1.477(8) . ?
C432 C434 1.476(8) . ?
C433 H43C 0.9900 . ?
C433 H43D 0.9900 . ?
C433 C435 1.474(8) . ?
C434 H43E 0.9900 . ?
C434 H43F 0.9900 . ?
C434 C435 1.479(8) . ?
C441 H44A 0.9900 . ?
C441 H44B 0.9900 . ?
C441 C442 1.536(18) . ?
C442 H44C 0.9900 . ?
C442 H44D 0.9900 . ?
C442 C443 1.403(19) . ?
C443 H443 0.9500 . ?
C443 C444 1.46(2) . ?
C444 H44E 0.9800 . ?
C444 H44F 0.9800 . ?
C444 H44G 0.9800 . ?

loop_
_geom_angle_atom_site_label_1
_geom_angle_atom_site_label_2
_geom_angle_atom_site_label_3
_geom_angle
_geom_angle_site_symmetry_1
_geom_angle_site_symmetry_3
_geom_angle_publ_flag
Mo12 Mo11 Mo13 60.13(2) . . ?
Mo12 Mo11 Mo14 90.15(3) . . ?
Mo12 Mo11 Mo15 60.35(2) . . ?
Mo12 Mo11 I11 121.06(3) . . ?
Mo12 Mo11 I13 60.90(2) . . ?
Mo12 Mo11 I16 121.27(3) . . ?
Mo12 Mo11 I17 61.08(2) . . ?
Mo13 Mo11 I11 60.93(2) . . ?
Mo13 Mo11 I13 60.606(18) . . ?
Mo13 Mo11 I16 120.82(2) . . ?
Mo13 Mo11 I17 121.21(3) . . ?
Mo14 Mo11 Mo13 59.97(2) . . ?
Mo14 Mo11 I11 61.11(2) . . ?
Mo14 Mo11 I13 120.57(3) . . ?
Mo14 Mo11 I16 60.860(19) . . ?
Mo14 Mo11 I17 121.14(3) . . ?
Mo15 Mo11 Mo13 90.23(3) . . ?
Mo15 Mo11 Mo14 59.99(2) . . ?
Mo15 Mo11 I11 121.08(3) . . ?
Mo15 Mo11 I13 121.25(3) . . ?
Mo15 Mo11 I16 60.92(2) . . ?
Mo15 Mo11 I17 61.16(2) . . ?
I11 Mo11 I13 89.51(2) . . ?
I11 Mo11 I16 89.80(2) . . ?
I13 Mo11 I16 177.70(3) . . ?
I17 Mo11 I11 177.31(3) . . ?
I17 Mo11 I13 90.34(2) . . ?
I17 Mo11 I16 90.24(2) . . ?
C11 Mo11 Mo12 134.95(19) . . ?
C11 Mo11 Mo13 136.38(19) . . ?
C11 Mo11 Mo14 134.87(19) . . ?
C11 Mo11 Mo15 133.39(19) . . ?
C11 Mo11 I11 89.6(2) . . ?
C11 Mo11 I13 90.12(17) . . ?
C11 Mo11 I16 87.69(17) . . ?
C11 Mo11 I17 87.7(2) . . ?
Mo11 Mo12 Mo13 60.17(2) . . ?
Mo11 Mo12 Mo15 59.84(2) . . ?
Mo11 Mo12 I12 120.59(2) . . ?
Mo11 Mo12 I13 61.39(2) . . ?
Mo11 Mo12 I15 121.04(3) . . ?
Mo11 Mo12 I17 61.06(2) . . ?
Mo13 Mo12 Mo15 89.96(2) . . ?
Mo13 Mo12 I12 121.27(3) . . ?
Mo13 Mo12 I13 60.79(2) . . ?
Mo13 Mo12 I15 60.87(2) . . ?
Mo13 Mo12 I17 121.23(3) . . ?
Mo15 Mo12 I12 60.76(2) . . ?
Mo15 Mo12 I13 121.23(3) . . ?
Mo15 Mo12 I15 121.13(3) . . ?
Mo15 Mo12 I17 60.994(19) . . ?
Mo16 Mo12 Mo11 89.89(2) . . ?
Mo16 Mo12 Mo13 59.95(2) . . ?
Mo16 Mo12 Mo15 59.86(2) . . ?
Mo16 Mo12 I12 61.33(2) . . ?
Mo16 Mo12 I13 120.73(3) . . ?
Mo16 Mo12 I15 61.276(19) . . ?
Mo16 Mo12 I17 120.85(2) . . ?
I13 Mo12 I12 177.52(3) . . ?
I13 Mo12 I15 89.31(2) . . ?
I13 Mo12 I17 90.61(2) . . ?
I15 Mo12 I12 90.70(2) . . ?
I17 Mo12 I12 89.27(2) . . ?
I17 Mo12 I15 177.42(3) . . ?
C12 Mo12 Mo11 135.8(2) . . ?
C12 Mo12 Mo13 134.62(19) . . ?
C12 Mo12 Mo15 135.40(19) . . ?
C12 Mo12 Mo16 134.3(2) . . ?
C12 Mo12 I12 88.4(2) . . ?
C12 Mo12 I13 89.1(2) . . ?
C12 Mo12 I15 87.9(2) . . ?
C12 Mo12 I17 89.5(2) . . ?
Mo11 Mo13 I11 61.07(2) . . ?
Mo11 Mo13 I13 61.306(19) . . ?
Mo11 Mo13 I15 120.71(3) . . ?
Mo11 Mo13 I18 120.76(2) . . ?
Mo12 Mo13 Mo11 59.69(2) . . ?
Mo12 Mo13 I11 120.76(3) . . ?
Mo12 Mo13 I13 61.00(2) . . ?
Mo12 Mo13 I15 61.03(2) . . ?
Mo12 Mo13 I18 121.06(3) . . ?
Mo14 Mo13 Mo11 59.84(2) . . ?
Mo14 Mo13 Mo12 89.82(2) . . ?
Mo14 Mo13 I11 61.11(2) . . ?
Mo14 Mo13 I13 121.14(3) . . ?
Mo14 Mo13 I15 121.19(3) . . ?
Mo14 Mo13 I18 60.928(19) . . ?
Mo16 Mo13 Mo11 89.50(2) . . ?
Mo16 Mo13 Mo12 59.77(2) . . ?
Mo16 Mo13 Mo14 59.92(2) . . ?
Mo16 Mo13 I11 121.03(2) . . ?
Mo16 Mo13 I13 120.76(3) . . ?
Mo16 Mo13 I15 61.27(2) . . ?
Mo16 Mo13 I18 61.30(2) . . ?
I11 Mo13 I18 89.97(2) . . ?
I13 Mo13 I11 89.98(2) . . ?
I13 Mo13 I15 89.51(2) . . ?
I13 Mo13 I18 177.48(3) . . ?
I15 Mo13 I11 177.46(3) . . ?
I15 Mo13 I18 90.42(2) . . ?
C13 Mo13 Mo11 136.6(2) . . ?
C13 Mo13 Mo12 137.01(19) . . ?
C13 Mo13 Mo14 133.15(19) . . ?
C13 Mo13 Mo16 133.9(2) . . ?
C13 Mo13 I11 88.42(19) . . ?
C13 Mo13 I13 90.99(19) . . ?
C13 Mo13 I15 89.10(19) . . ?
C13 Mo13 I18 86.49(19) . . ?
Mo11 Mo14 Mo13 60.19(2) . . ?
Mo11 Mo14 I11 61.16(2) . . ?
Mo11 Mo14 I14 121.35(3) . . ?
Mo11 Mo14 I16 61.389(19) . . ?
Mo11 Mo14 I18 121.39(2) . . ?
Mo13 Mo14 I11 61.02(2) . . ?
Mo13 Mo14 I14 121.26(3) . . ?
Mo13 Mo14 I16 121.57(3) . . ?
Mo13 Mo14 I18 61.201(19) . . ?
Mo15 Mo14 Mo11 59.96(2) . . ?
Mo15 Mo14 Mo13 90.34(2) . . ?
Mo15 Mo14 Mo16 59.97(2) . . ?
Mo15 Mo14 I11 121.11(3) . . ?
Mo15 Mo14 I14 61.39(2) . . ?
Mo15 Mo14 I16 61.10(2) . . ?
Mo15 Mo14 I18 121.37(3) . . ?
Mo16 Mo14 Mo11 89.73(2) . . ?
Mo16 Mo14 Mo13 59.96(2) . . ?
Mo16 Mo14 I11 120.98(2) . . ?
Mo16 Mo14 I14 61.32(2) . . ?
Mo16 Mo14 I16 121.07(3) . . ?
Mo16 Mo14 I18 61.41(2) . . ?
I14 Mo14 I11 177.06(3) . . ?
I16 Mo14 I11 90.11(2) . . ?
I16 Mo14 I14 89.99(2) . . ?
I16 Mo14 I18 176.78(3) . . ?
I18 Mo14 I11 90.08(2) . . ?
I18 Mo14 I14 89.66(2) . . ?
C14 Mo14 Mo11 134.6(2) . . ?
C14 Mo14 Mo13 134.34(18) . . ?
C14 Mo14 Mo15 135.31(18) . . ?
C14 Mo14 Mo16 135.6(2) . . ?
C14 Mo14 I11 88.07(19) . . ?
C14 Mo14 I14 88.99(19) . . ?
C14 Mo14 I16 88.43(19) . . ?
C14 Mo14 I18 88.36(19) . . ?
Mo11 Mo15 Mo12 59.81(2) . . ?
Mo11 Mo15 Mo14 60.05(2) . . ?
Mo11 Mo15 I12 120.91(2) . . ?
Mo11 Mo15 I14 121.05(3) . . ?
Mo11 Mo15 I16 61.40(2) . . ?
Mo11 Mo15 I17 61.00(2) . . ?
Mo12 Mo15 I12 61.11(2) . . ?
Mo12 Mo15 I14 120.95(3) . . ?
Mo12 Mo15 I16 121.21(3) . . ?
Mo12 Mo15 I17 60.847(19) . . ?
Mo14 Mo15 Mo12 89.88(2) . . ?
Mo14 Mo15 I12 121.43(3) . . ?
Mo14 Mo15 I14 61.00(2) . . ?
Mo14 Mo15 I16 61.05(2) . . ?
Mo14 Mo15 I17 121.05(3) . . ?
Mo16 Mo15 Mo11 89.81(2) . . ?
Mo16 Mo15 Mo12 59.76(2) . . ?
Mo16 Mo15 Mo14 60.02(2) . . ?
Mo16 Mo15 I12 61.42(2) . . ?
Mo16 Mo15 I14 61.196(19) . . ?
Mo16 Mo15 I16 121.06(3) . . ?
Mo16 Mo15 I17 120.60(2) . . ?
I12 Mo15 I14 90.33(2) . . ?
I12 Mo15 I16 177.07(3) . . ?
I12 Mo15 I17 89.39(2) . . ?
I16 Mo15 I14 89.74(2) . . ?
I16 Mo15 I17 90.42(2) . . ?
I17 Mo15 I14 177.64(3) . . ?
C15 Mo15 Mo11 135.75(19) . . ?
C15 Mo15 Mo12 135.55(19) . . ?
C15 Mo15 Mo14 134.56(19) . . ?
C15 Mo15 Mo16 134.44(19) . . ?
C15 Mo15 I12 88.3(2) . . ?
C15 Mo15 I14 87.97(19) . . ?
C15 Mo15 I16 88.76(19) . . ?
C15 Mo15 I17 89.68(19) . . ?
Mo12 Mo16 Mo13 60.29(2) . . ?
Mo12 Mo16 Mo14 90.23(3) . . ?
Mo12 Mo16 Mo15 60.38(2) . . ?
Mo12 Mo16 I12 61.11(2) . . ?
Mo12 Mo16 I14 121.67(3) . . ?
Mo12 Mo16 I15 61.063(19) . . ?
Mo12 Mo16 I18 121.36(3) . . ?
Mo13 Mo16 I12 121.40(3) . . ?
Mo13 Mo16 I14 121.13(3) . . ?
Mo13 Mo16 I15 60.90(2) . . ?
Mo13 Mo16 I18 61.08(2) . . ?
Mo14 Mo16 Mo13 60.12(2) . . ?
Mo14 Mo16 I12 120.85(3) . . ?
Mo14 Mo16 I14 61.03(2) . . ?
Mo14 Mo16 I15 121.02(3) . . ?
Mo14 Mo16 I18 60.91(2) . . ?
Mo15 Mo16 Mo13 90.46(3) . . ?
Mo15 Mo16 Mo14 60.01(2) . . ?
Mo15 Mo16 I12 60.85(2) . . ?
Mo15 Mo16 I14 61.302(19) . . ?
Mo15 Mo16 I15 121.44(3) . . ?
Mo15 Mo16 I18 120.91(3) . . ?
I12 Mo16 I14 90.08(2) . . ?
I12 Mo16 I18 177.33(3) . . ?
I14 Mo16 I18 89.23(2) . . ?
I15 Mo16 I12 90.46(2) . . ?
I15 Mo16 I14 177.01(3) . . ?
I15 Mo16 I18 90.10(2) . . ?
C16 Mo16 Mo12 132.80(19) . . ?
C16 Mo16 Mo13 134.0(2) . . ?
C16 Mo16 Mo14 136.96(19) . . ?
C16 Mo16 Mo15 135.4(2) . . ?
C16 Mo16 I12 87.8(2) . . ?
C16 Mo16 I14 90.31(18) . . ?
C16 Mo16 I15 86.77(18) . . ?
C16 Mo16 I18 89.6(2) . . ?
Mo13 I11 Mo11 57.992(19) . . ?
Mo13 I11 Mo14 57.867(19) . . ?
Mo14 I11 Mo11 57.738(19) . . ?
Mo12 I12 Mo16 57.56(2) . . ?
Mo15 I12 Mo12 58.124(19) . . ?
Mo15 I12 Mo16 57.73(2) . . ?
Mo12 I13 Mo11 57.713(19) . . ?
Mo13 I13 Mo11 58.088(18) . . ?
Mo13 I13 Mo12 58.21(2) . . ?
Mo14 I14 Mo15 57.610(19) . . ?
Mo14 I14 Mo16 57.646(19) . . ?
Mo16 I14 Mo15 57.502(18) . . ?
Mo12 I15 Mo16 57.661(18) . . ?
Mo13 I15 Mo12 58.11(2) . . ?
Mo13 I15 Mo16 57.826(19) . . ?
Mo14 I16 Mo11 57.751(18) . . ?
Mo14 I16 Mo15 57.85(2) . . ?
Mo15 I16 Mo11 57.675(19) . . ?
Mo11 I17 Mo12 57.86(2) . . ?
Mo11 I17 Mo15 57.84(2) . . ?
Mo12 I17 Mo15 58.159(18) . . ?
Mo13 I18 Mo16 57.62(2) . . ?
Mo14 I18 Mo13 57.871(18) . . ?
Mo14 I18 Mo16 57.68(2) . . ?
N11 C11 Mo11 177.4(7) . . ?
N12 C12 Mo12 178.8(8) . . ?
N13 C13 Mo13 174.6(7) . . ?
N14 C14 Mo14 179.0(7) . . ?
N15 C15 Mo15 179.4(7) . . ?
N16 C16 Mo16 174.6(7) . . ?
Mo22 Mo21 Mo23 59.84(2) . . ?
Mo22 Mo21 Mo25 90.05(2) . . ?
Mo22 Mo21 I23 61.13(2) . . ?
Mo22 Mo21 I25 121.31(3) . . ?
Mo22 Mo21 I26 121.10(3) . . ?
Mo22 Mo21 I27 61.26(2) . . ?
Mo23 Mo21 I23 61.17(2) . . ?
Mo23 Mo21 I25 121.02(2) . . ?
Mo23 Mo21 I26 61.26(2) . . ?
Mo23 Mo21 I27 121.10(3) . . ?
Mo25 Mo21 Mo23 60.05(2) . . ?
Mo25 Mo21 I23 121.21(3) . . ?
Mo25 Mo21 I25 60.98(2) . . ?
Mo25 Mo21 I26 61.27(2) . . ?
Mo25 Mo21 I27 121.42(3) . . ?
Mo26 Mo21 Mo22 60.22(2) . . ?
Mo26 Mo21 Mo23 90.00(2) . . ?
Mo26 Mo21 Mo25 59.93(2) . . ?
Mo26 Mo21 I23 121.34(3) . . ?
Mo26 Mo21 I25 61.09(2) . . ?
Mo26 Mo21 I26 121.19(3) . . ?
Mo26 Mo21 I27 61.49(2) . . ?
I23 Mo21 I25 177.16(3) . . ?
I23 Mo21 I27 89.78(2) . . ?
I26 Mo21 I23 89.85(2) . . ?
I26 Mo21 I25 89.86(2) . . ?
I26 Mo21 I27 176.89(3) . . ?
I27 Mo21 I25 90.35(2) . . ?
C21 Mo21 Mo22 135.7(2) . . ?
C21 Mo21 Mo23 135.0(2) . . ?
C21 Mo21 Mo25 134.3(2) . . ?
C21 Mo21 Mo26 135.0(2) . . ?
C21 Mo21 I23 89.0(2) . . ?
C21 Mo21 I25 88.2(2) . . ?
C21 Mo21 I26 88.0(2) . . ?
C21 Mo21 I27 88.9(2) . . ?
Mo21 Mo22 Mo24 90.11(2) . . ?
Mo21 Mo22 Mo26 59.88(2) . . ?
Mo21 Mo22 I21 121.31(3) . . ?
Mo21 Mo22 I23 61.00(2) . . ?
Mo21 Mo22 I27 61.18(2) . . ?
Mo21 Mo22 I28 121.24(3) . . ?
Mo23 Mo22 Mo21 60.26(2) . . ?
Mo23 Mo22 Mo24 59.97(2) . . ?
Mo23 Mo22 Mo26 90.04(3) . . ?
Mo23 Mo22 I21 61.05(2) . . ?
Mo23 Mo22 I23 61.26(2) . . ?
Mo23 Mo22 I27 121.43(3) . . ?
Mo23 Mo22 I28 120.94(2) . . ?
Mo24 Mo22 Mo26 60.06(2) . . ?
Mo24 Mo22 I21 61.071(19) . . ?
Mo24 Mo22 I23 121.22(3) . . ?
Mo24 Mo22 I27 121.41(3) . . ?
Mo24 Mo22 I28 60.98(2) . . ?
Mo26 Mo22 I21 121.13(2) . . ?
Mo26 Mo22 I23 120.87(3) . . ?
Mo26 Mo22 I27 61.353(19) . . ?
Mo26 Mo22 I28 61.37(2) . . ?
I21 Mo22 I27 176.96(3) . . ?
I23 Mo22 I21 90.26(2) . . ?
I23 Mo22 I27 89.67(2) . . ?
I28 Mo22 I21 89.63(2) . . ?
I28 Mo22 I23 177.28(3) . . ?
I28 Mo22 I27 90.29(2) . . ?
C22 Mo22 Mo21 134.32(18) . . ?
C22 Mo22 Mo23 134.89(19) . . ?
C22 Mo22 Mo24 135.57(18) . . ?
C22 Mo22 Mo26 135.07(19) . . ?
C22 Mo22 I21 89.01(18) . . ?
C22 Mo22 I23 88.2(2) . . ?
C22 Mo22 I27 87.95(18) . . ?
C22 Mo22 I28 89.1(2) . . ?
Mo21 Mo23 I21 121.15(3) . . ?
Mo21 Mo23 I23 60.80(2) . . ?
Mo21 Mo23 I24 120.53(3) . . ?
Mo21 Mo23 I26 60.71(2) . . ?
Mo22 Mo23 Mo21 59.89(2) . . ?
Mo22 Mo23 Mo24 60.17(2) . . ?
Mo22 Mo23 Mo25 89.96(3) . . ?
Mo22 Mo23 I21 61.26(2) . . ?
Mo22 Mo23 I23 61.01(2) . . ?
Mo22 Mo23 I24 120.90(3) . . ?
Mo22 Mo23 I26 120.59(3) . . ?
Mo24 Mo23 Mo21 90.01(3) . . ?
Mo24 Mo23 Mo25 60.05(2) . . ?
Mo24 Mo23 I21 61.21(2) . . ?
Mo24 Mo23 I23 121.18(3) . . ?
Mo24 Mo23 I24 60.73(2) . . ?
Mo24 Mo23 I26 121.06(3) . . ?
Mo25 Mo23 Mo21 59.86(2) . . ?
Mo25 Mo23 I21 121.25(3) . . ?
Mo25 Mo23 I23 120.65(3) . . ?
Mo25 Mo23 I24 60.68(2) . . ?
Mo25 Mo23 I26 61.01(2) . . ?
I21 Mo23 I23 90.25(2) . . ?
I21 Mo23 I24 90.21(2) . . ?
I21 Mo23 I26 177.45(3) . . ?
I23 Mo23 I24 177.95(3) . . ?
I23 Mo23 I26 89.34(2) . . ?
I26 Mo23 I24 90.11(2) . . ?
C23 Mo23 Mo21 135.8(2) . . ?
C23 Mo23 Mo22 134.5(2) . . ?
C23 Mo23 Mo24 134.2(2) . . ?
C23 Mo23 Mo25 135.5(2) . . ?
C23 Mo23 I21 87.7(2) . . ?
C23 Mo23 I23 89.04(18) . . ?
C23 Mo23 I24 88.98(18) . . ?
C23 Mo23 I26 89.8(2) . . ?
Mo22 Mo24 Mo25 89.82(2) . . ?
Mo22 Mo24 Mo26 60.00(2) . . ?
Mo22 Mo24 I21 61.095(19) . . ?
Mo22 Mo24 I22 121.46(3) . . ?
Mo22 Mo24 I24 121.29(3) . . ?
Mo22 Mo24 I28 60.93(2) . . ?
Mo23 Mo24 Mo22 59.86(2) . . ?
Mo23 Mo24 Mo25 60.11(2) . . ?
Mo23 Mo24 Mo26 89.94(2) . . ?
Mo23 Mo24 I21 61.02(2) . . ?
Mo23 Mo24 I22 121.31(3) . . ?
Mo23 Mo24 I24 61.43(2) . . ?
Mo23 Mo24 I28 120.78(2) . . ?
Mo25 Mo24 Mo26 59.75(2) . . ?
Mo25 Mo24 I21 121.13(3) . . ?
Mo25 Mo24 I22 61.21(2) . . ?
Mo25 Mo24 I24 60.94(2) . . ?
Mo25 Mo24 I28 121.08(3) . . ?
Mo26 Mo24 I21 121.09(2) . . ?
Mo26 Mo24 I22 61.468(19) . . ?
Mo26 Mo24 I24 120.67(3) . . ?
Mo26 Mo24 I28 61.33(2) . . ?
I22 Mo24 I21 177.00(3) . . ?
I24 Mo24 I21 90.49(2) . . ?
I24 Mo24 I22 89.25(2) . . ?
I24 Mo24 I28 177.41(3) . . ?
I28 Mo24 I21 89.62(2) . . ?
I28 Mo24 I22 90.51(2) . . ?
C24 Mo24 Mo22 135.3(2) . . ?
C24 Mo24 Mo23 135.0(2) . . ?
C24 Mo24 Mo25 134.90(19) . . ?
C24 Mo24 Mo26 135.1(2) . . ?
C24 Mo24 I21 88.8(2) . . ?
C24 Mo24 I22 88.2(2) . . ?
C24 Mo24 I24 88.5(2) . . ?
C24 Mo24 I28 88.9(2) . . ?
Mo21 Mo25 Mo23 60.09(2) . . ?
Mo21 Mo25 Mo24 90.03(2) . . ?
Mo21 Mo25 I22 121.49(3) . . ?
Mo21 Mo25 I24 121.41(3) . . ?
Mo21 Mo25 I25 61.28(2) . . ?
Mo21 Mo25 I26 60.82(2) . . ?
Mo23 Mo25 I22 120.81(3) . . ?
Mo23 Mo25 I24 61.32(2) . . ?
Mo23 Mo25 I25 121.36(2) . . ?
Mo23 Mo25 I26 61.12(2) . . ?
Mo24 Mo25 Mo23 59.84(2) . . ?
Mo24 Mo25 I22 60.98(2) . . ?
Mo24 Mo25 I24 60.88(2) . . ?
Mo24 Mo25 I25 121.39(3) . . ?
Mo24 Mo25 I26 120.96(3) . . ?
Mo26 Mo25 Mo21 59.96(2) . . ?
Mo26 Mo25 Mo23 90.04(3) . . ?
Mo26 Mo25 Mo24 60.19(2) . . ?
Mo26 Mo25 I22 61.53(2) . . ?
Mo26 Mo25 I24 121.06(3) . . ?
Mo26 Mo25 I25 61.21(2) . . ?
Mo26 Mo25 I26 120.77(3) . . ?
I24 Mo25 I22 89.09(2) . . ?
I24 Mo25 I25 176.95(3) . . ?
I24 Mo25 I26 90.52(2) . . ?
I25 Mo25 I22 90.47(2) . . ?
I25 Mo25 I26 89.77(2) . . ?
I26 Mo25 I22 177.38(3) . . ?
C25 Mo25 Mo21 133.8(2) . . ?
C25 Mo25 Mo23 135.3(2) . . ?
C25 Mo25 Mo24 136.1(2) . . ?
C25 Mo25 Mo26 134.7(2) . . ?
C25 Mo25 I22 89.2(2) . . ?
C25 Mo25 I24 89.6(2) . . ?
C25 Mo25 I25 87.4(2) . . ?
C25 Mo25 I26 88.3(2) . . ?
Mo21 Mo26 Mo22 59.90(2) . . ?
Mo21 Mo26 Mo24 90.04(3) . . ?
Mo21 Mo26 I22 121.18(3) . . ?
Mo21 Mo26 I25 61.29(2) . . ?
Mo21 Mo26 I27 61.06(2) . . ?
Mo21 Mo26 I28 120.59(3) . . ?
Mo22 Mo26 Mo24 59.93(2) . . ?
Mo22 Mo26 I22 120.72(3) . . ?
Mo22 Mo26 I25 121.18(3) . . ?
Mo22 Mo26 I27 61.011(19) . . ?
Mo22 Mo26 I28 60.69(2) . . ?
Mo24 Mo26 I22 60.787(19) . . ?
Mo24 Mo26 I25 121.16(3) . . ?
Mo24 Mo26 I27 120.94(3) . . ?
Mo24 Mo26 I28 60.71(2) . . ?
Mo25 Mo26 Mo21 60.11(2) . . ?
Mo25 Mo26 Mo22 89.96(3) . . ?
Mo25 Mo26 Mo24 60.06(2) . . ?
Mo25 Mo26 I22 61.07(2) . . ?
Mo25 Mo26 I25 61.10(2) . . ?
Mo25 Mo26 I27 121.17(3) . . ?
Mo25 Mo26 I28 120.77(3) . . ?
I25 Mo26 I22 90.17(2) . . ?
I25 Mo26 I27 90.23(2) . . ?
I25 Mo26 I28 177.71(3) . . ?
I27 Mo26 I22 177.53(3) . . ?
I28 Mo26 I22 89.78(2) . . ?
I28 Mo26 I27 89.73(2) . . ?
C26 Mo26 Mo21 132.86(19) . . ?
C26 Mo26 Mo22 136.6(2) . . ?
C26 Mo26 Mo24 137.06(19) . . ?
C26 Mo26 Mo25 133.4(2) . . ?
C26 Mo26 I22 89.26(18) . . ?
C26 Mo26 I25 86.0(2) . . ?
C26 Mo26 I27 88.33(18) . . ?
C26 Mo26 I28 91.7(2) . . ?
Mo23 I21 Mo22 57.69(2) . . ?
Mo23 I21 Mo24 57.77(2) . . ?
Mo24 I21 Mo22 57.834(18) . . ?
Mo24 I22 Mo25 57.80(2) . . ?
Mo24 I22 Mo26 57.744(18) . . ?
Mo25 I22 Mo26 57.40(2) . . ?
Mo21 I23 Mo22 57.87(2) . . ?
Mo21 I23 Mo23 58.035(19) . . ?
Mo22 I23 Mo23 57.73(2) . . ?
Mo24 I24 Mo23 57.84(2) . . ?
Mo24 I24 Mo25 58.18(2) . . ?
Mo25 I24 Mo23 58.002(19) . . ?
Mo25 I25 Mo21 57.747(19) . . ?
Mo25 I25 Mo26 57.69(2) . . ?
Mo26 I25 Mo21 57.62(2) . . ?
Mo21 I26 Mo23 58.03(2) . . ?
Mo21 I26 Mo25 57.91(2) . . ?
Mo25 I26 Mo23 57.87(2) . . ?
Mo21 I27 Mo22 57.56(2) . . ?
Mo21 I27 Mo26 57.44(2) . . ?
Mo22 I27 Mo26 57.637(18) . . ?
Mo22 I28 Mo24 58.086(19) . . ?
Mo22 I28 Mo26 57.94(2) . . ?
Mo24 I28 Mo26 57.96(2) . . ?
N21 C21 Mo21 178.3(8) . . ?
N22 C22 Mo22 179.0(7) . . ?
N23 C23 Mo23 177.8(8) . . ?
N24 C24 Mo24 178.4(8) . . ?
N25 C25 Mo25 177.9(8) . . ?
N26 C26 Mo26 175.9(8) . . ?
C111 N1 C121 111.1(5) . . ?
C111 N1 C131 107.9(5) . . ?
C111 N1 C141 109.2(5) . . ?
C121 N1 C141 109.0(5) . . ?
C131 N1 C121 108.3(5) . . ?
C131 N1 C141 111.4(6) . . ?
N1 C111 H11A 108.2 . . ?
N1 C111 H11B 108.2 . . ?
N1 C111 C112 116.4(6) . . ?
H11A C111 H11B 107.4 . . ?
C112 C111 H11A 108.2 . . ?
C112 C111 H11B 108.2 . . ?
C111 C112 H11C 109.8 . . ?
C111 C112 H11D 109.8 . . ?
C111 C112 C113 109.4(6) . . ?
H11C C112 H11D 108.2 . . ?
C113 C112 H11C 109.8 . . ?
C113 C112 H11D 109.8 . . ?
C112 C113 H11E 108.8 . . ?
C112 C113 H11F 108.8 . . ?
H11E C113 H11F 107.7 . . ?
C114 C113 C112 113.7(6) . . ?
C114 C113 H11E 108.8 . . ?
C114 C113 H11F 108.8 . . ?
C113 C114 H11G 109.5 . . ?
C113 C114 H11H 109.5 . . ?
C113 C114 H11I 109.5 . . ?
H11G C114 H11H 109.5 . . ?
H11G C114 H11I 109.5 . . ?
H11H C114 H11I 109.5 . . ?
N1 C121 H12A 108.5 . . ?
N1 C121 H12B 108.5 . . ?
H12A C121 H12B 107.5 . . ?
C122 C121 N1 115.0(5) . . ?
C122 C121 H12A 108.5 . . ?
C122 C121 H12B 108.5 . . ?
C121 C122 H12C 109.8 . . ?
C121 C122 H12D 109.8 . . ?
C121 C122 C123 109.4(6) . . ?
H12C C122 H12D 108.2 . . ?
C123 C122 H12C 109.8 . . ?
C123 C122 H12D 109.8 . . ?
C122 C123 H12E 109.3 . . ?
C122 C123 H12F 109.3 . . ?
H12E C123 H12F 108.0 . . ?
C124 C123 C122 111.6(6) . . ?
C124 C123 H12E 109.3 . . ?
C124 C123 H12F 109.3 . . ?
C123 C124 H12G 109.5 . . ?
C123 C124 H12H 109.5 . . ?
C123 C124 H12I 109.5 . . ?
H12G C124 H12H 109.5 . . ?
H12G C124 H12I 109.5 . . ?
H12H C124 H12I 109.5 . . ?
N1 C131 H13A 108.3 . . ?
N1 C131 H13B 108.3 . . ?
H13A C131 H13B 107.4 . . ?
C132 C131 N1 116.1(6) . . ?
C132 C131 H13A 108.3 . . ?
C132 C131 H13B 108.3 . . ?
C131 C132 H13C 109.5 . . ?
C131 C132 H13D 109.5 . . ?
C131 C132 C133 110.8(8) . . ?
H13C C132 H13D 108.1 . . ?
C133 C132 H13C 109.5 . . ?
C133 C132 H13D 109.5 . . ?
C132 C133 H13E 107.8 . . ?
C132 C133 H13F 107.8 . . ?
H13E C133 H13F 107.1 . . ?
C134 C133 C132 118.1(11) . . ?
C134 C133 H13E 107.8 . . ?
C134 C133 H13F 107.8 . . ?
C133 C134 H13G 109.5 . . ?
C133 C134 H13H 109.5 . . ?
C133 C134 H13I 109.5 . . ?
H13G C134 H13H 109.5 . . ?
H13G C134 H13I 109.5 . . ?
H13H C134 H13I 109.5 . . ?
N1 C141 H14A 108.7 . . ?
N1 C141 H14B 108.7 . . ?
H14A C141 H14B 107.6 . . ?
C142 C141 N1 114.2(6) . . ?
C142 C141 H14A 108.7 . . ?
C142 C141 H14B 108.7 . . ?
C141 C142 H14C 109.4 . . ?
C141 C142 H14D 109.4 . . ?
H14C C142 H14D 108.0 . . ?
C143 C142 C141 111.3(7) . . ?
C143 C142 H14C 109.4 . . ?
C143 C142 H14D 109.4 . . ?
C142 C143 H14E 109.4 . . ?
C142 C143 H14F 109.4 . . ?
C142 C143 C144 111.2(8) . . ?
H14E C143 H14F 108.0 . . ?
C144 C143 H14E 109.4 . . ?
C144 C143 H14F 109.4 . . ?
C143 C144 H14G 109.5 . . ?
C143 C144 H14H 109.5 . . ?
C143 C144 H14I 109.5 . . ?
H14G C144 H14H 109.5 . . ?
H14G C144 H14I 109.5 . . ?
H14H C144 H14I 109.5 . . ?
C211 N2 C221 111.6(8) . . ?
C211 N2 C231 107.9(8) . . ?
C211 N2 C241 110.1(8) . . ?
C221 N2 C231 111.3(8) . . ?
C241 N2 C221 109.7(7) . . ?
C241 N2 C231 106.1(9) . . ?
N2 C211 H21A 108.1 . . ?
N2 C211 H21B 108.1 . . ?
H21A C211 H21B 107.3 . . ?
C212 C211 N2 116.8(10) . . ?
C212 C211 H21A 108.1 . . ?
C212 C211 H21B 108.1 . . ?
C211 C212 H21C 108.6 . . ?
C211 C212 H21D 108.6 . . ?
C211 C212 C213 114.5(10) . . ?
H21C C212 H21D 107.6 . . ?
C213 C212 H21C 108.6 . . ?
C213 C212 H21D 108.6 . . ?
C212 C213 H21E 108.7 . . ?
C212 C213 H21F 108.7 . . ?
H21E C213 H21F 107.6 . . ?
C214 C213 C212 114.2(12) . . ?
C214 C213 H21E 108.7 . . ?
C214 C213 H21F 108.7 . . ?
C213 C214 H21G 109.5 . . ?
C213 C214 H21H 109.5 . . ?
C213 C214 H21I 109.5 . . ?
H21G C214 H21H 109.5 . . ?
H21G C214 H21I 109.5 . . ?
H21H C214 H21I 109.5 . . ?
N2 C221 H22A 107.7 . . ?
N2 C221 H22B 107.7 . . ?
H22A C221 H22B 107.1 . . ?
C222 C221 N2 118.3(8) . . ?
C222 C221 H22A 107.7 . . ?
C222 C221 H22B 107.7 . . ?
C221 C222 H22C 108.7 . . ?
C221 C222 H22D 108.7 . . ?
C221 C222 C223 114.1(10) . . ?
H22C C222 H22D 107.6 . . ?
C223 C222 H22C 108.7 . . ?
C223 C222 H22D 108.7 . . ?
C224 C223 C222 116.0(11) . . ?
C225 C223 C222 105.0(16) . . ?
C223 C224 H22E 109.5 . . ?
C223 C224 H22F 109.5 . . ?
C223 C224 H22G 109.5 . . ?
H22E C224 H22F 109.5 . . ?
H22E C224 H22G 109.5 . . ?
H22F C224 H22G 109.5 . . ?
C223 C225 H22H 109.5 . . ?
C223 C225 H22I 109.5 . . ?
C223 C225 H22J 109.5 . . ?
H22H C225 H22I 109.5 . . ?
H22H C225 H22J 109.5 . . ?
H22I C225 H22J 109.5 . . ?
N2 C231 H23A 106.8 . . ?
N2 C231 H23B 106.8 . . ?
H23A C231 H23B 106.7 . . ?
C232 C231 N2 122.0(12) . . ?
C232 C231 H23A 106.8 . . ?
C232 C231 H23B 106.8 . . ?
C231 C232 H23C 108.8 . . ?
C231 C232 H23D 108.8 . . ?
C231 C232 C233 113.9(13) . . ?
H23C C232 H23D 107.7 . . ?
C233 C232 H23C 108.8 . . ?
C233 C232 H23D 108.8 . . ?
C232 C233 H23E 107.8 . . ?
C232 C233 H23F 107.8 . . ?
H23E C233 H23F 107.1 . . ?
C234 C233 C232 118.1(15) . . ?
C234 C233 H23E 107.8 . . ?
C234 C233 H23F 107.8 . . ?
C233 C234 H23G 109.5 . . ?
C233 C234 H23H 109.5 . . ?
C233 C234 H23J 109.5 . . ?
H23G C234 H23H 109.5 . . ?
H23G C234 H23J 109.5 . . ?
H23H C234 H23J 109.5 . . ?
N2 C241 H24A 106.9 . . ?
N2 C241 H24B 106.9 . . ?
H24A C241 H24B 106.7 . . ?
C242 C241 N2 121.7(10) . . ?
C242 C241 H24A 106.9 . . ?
C242 C241 H24B 106.9 . . ?
C241 C242 C243 109.5(17) . . ?
C241 C242 C245 118.5(18) . . ?
C242 C243 H24C 107.6 . . ?
C242 C243 H24D 107.6 . . ?
H24C C243 H24D 107.0 . . ?
C244 C243 C242 119(2) . . ?
C244 C243 H24C 107.6 . . ?
C244 C243 H24D 107.6 . . ?
C243 C244 H24E 109.5 . . ?
C243 C244 H24F 109.5 . . ?
C243 C244 H24G 109.5 . . ?
H24E C244 H24F 109.5 . . ?
H24E C244 H24G 109.5 . . ?
H24F C244 H24G 109.5 . . ?
C242 C245 H24H 107.2 . . ?
C242 C245 H24I 107.2 . . ?
H24H C245 H24I 106.8 . . ?
C246 C245 C242 121(2) . . ?
C246 C245 H24H 107.2 . . ?
C246 C245 H24I 107.2 . . ?
C245 C246 H24J 109.5 . . ?
C245 C246 H24K 109.5 . . ?
C245 C246 H24L 109.5 . . ?
H24J C246 H24K 109.5 . . ?
H24J C246 H24L 109.5 . . ?
H24K C246 H24L 109.5 . . ?
C311 N3 C331 111.2(8) . . ?
C311 N3 C341 110.1(7) . . ?
C321 N3 C311 107.4(7) . . ?
C321 N3 C331 111.0(6) . . ?
C321 N3 C341 110.6(8) . . ?
C341 N3 C331 106.7(7) . . ?
N3 C311 H31A 108.6 . . ?
N3 C311 H31B 108.6 . . ?
N3 C311 C312 114.7(8) . . ?
H31A C311 H31B 107.6 . . ?
C312 C311 H31A 108.6 . . ?
C312 C311 H31B 108.6 . . ?
C311 C312 H31C 108.4 . . ?
C311 C312 H31D 108.4 . . ?
H31C C312 H31D 107.5 . . ?
C313 C312 C311 115.5(9) . . ?
C313 C312 H31C 108.4 . . ?
C313 C312 H31D 108.4 . . ?
C312 C313 H31E 108.8 . . ?
C312 C313 H31F 108.8 . . ?
C312 C313 C314 113.6(10) . . ?
H31E C313 H31F 107.7 . . ?
C314 C313 H31E 108.8 . . ?
C314 C313 H31F 108.8 . . ?
C313 C314 H31G 109.5 . . ?
C313 C314 H31H 109.5 . . ?
C313 C314 H31I 109.5 . . ?
H31G C314 H31H 109.5 . . ?
H31G C314 H31I 109.5 . . ?
H31H C314 H31I 109.5 . . ?
N3 C321 H32A 108.7 . . ?
N3 C321 H32B 108.7 . . ?
N3 C321 C322 114.2(7) . . ?
H32A C321 H32B 107.6 . . ?
C322 C321 H32A 108.7 . . ?
C322 C321 H32B 108.7 . . ?
C321 C322 H32C 109.1 . . ?
C321 C322 H32D 109.1 . . ?
H32C C322 H32D 107.9 . . ?
C323 C322 C321 112.3(8) . . ?
C323 C322 H32C 109.1 . . ?
C323 C322 H32D 109.1 . . ?
C322 C323 H32E 109.7 . . ?
C322 C323 H32F 109.7 . . ?
H32E C323 H32F 108.2 . . ?
C324 C323 C322 110.0(10) . . ?
C324 C323 H32E 109.7 . . ?
C324 C323 H32F 109.7 . . ?
C323 C324 H32G 109.5 . . ?
C323 C324 H32H 109.5 . . ?
C323 C324 H32I 109.5 . . ?
H32G C324 H32H 109.5 . . ?
H32G C324 H32I 109.5 . . ?
H32H C324 H32I 109.5 . . ?
N3 C331 H33A 109.5 . . ?
N3 C331 H33B 109.5 . . ?
H33A C331 H33B 108.0 . . ?
C332 C331 N3 110.9(8) . . ?
C332 C331 H33A 109.5 . . ?
C332 C331 H33B 109.5 . . ?
C333 C332 C331 123.0(11) . . ?
C334 C332 C331 141.0(16) . . ?
C332 C333 H33C 109.0 . . ?
C332 C333 H33D 109.0 . . ?
C332 C333 C335 112.8(11) . . ?
H33C C333 H33D 107.8 . . ?
C335 C333 H33C 109.0 . . ?
C335 C333 H33D 109.0 . . ?
C332 C334 H33E 109.1 . . ?
C332 C334 H33F 109.1 . . ?
C332 C334 C335 112.5(12) . . ?
H33E C334 H33F 107.8 . . ?
C335 C334 H33E 109.1 . . ?
C335 C334 H33F 109.1 . . ?
N3 C341 H34A 108.6 . . ?
N3 C341 H34B 108.6 . . ?
H34A C341 H34B 107.6 . . ?
C342 C341 N3 114.4(9) . . ?
C342 C341 H34A 108.6 . . ?
C342 C341 H34B 108.6 . . ?
C343 C342 C341 120.2(13) . . ?
C345 C342 C341 114.9(19) . . ?
C342 C343 H34C 110.4 . . ?
C342 C343 H34D 110.4 . . ?
C342 C343 C344 106.5(15) . . ?
H34C C343 H34D 108.6 . . ?
C344 C343 H34C 110.4 . . ?
C344 C343 H34D 110.4 . . ?
C343 C344 H34E 109.5 . . ?
C343 C344 H34F 109.5 . . ?
C343 C344 H34G 109.5 . . ?
H34E C344 H34F 109.5 . . ?
H34E C344 H34G 109.5 . . ?
H34F C344 H34G 109.5 . . ?
C342 C345 H34H 110.4 . . ?
C342 C345 H34I 110.4 . . ?
C342 C345 C346 106.5(16) . . ?
H34H C345 H34I 108.6 . . ?
C346 C345 H34H 110.4 . . ?
C346 C345 H34I 110.4 . . ?
C345 C346 H34J 109.5 . . ?
C345 C346 H34K 109.5 . . ?
C345 C346 H34L 109.5 . . ?
H34J C346 H34K 109.5 . . ?
H34J C346 H34L 109.5 . . ?
H34K C346 H34L 109.5 . . ?
C421 N4 C411 105.1(7) . . ?
C431 N4 C411 110.5(9) . . ?
C431 N4 C421 110.9(9) . . ?
C431 N4 C441 108.0(9) . . ?
C441 N4 C411 111.7(8) . . ?
C441 N4 C421 110.7(9) . . ?
N4 C411 H41A 108.3 . . ?
N4 C411 H41B 108.3 . . ?
H41A C411 H41B 107.4 . . ?
C412 C411 N4 116.0(8) . . ?
C412 C411 H41A 108.3 . . ?
C412 C411 H41B 108.3 . . ?
C411 C412 H41C 109.6 . . ?
C411 C412 H41D 109.6 . . ?
C411 C412 C413 110.1(8) . . ?
H41C C412 H41D 108.2 . . ?
C413 C412 H41C 109.6 . . ?
C413 C412 H41D 109.6 . . ?
C412 C413 H41E 108.8 . . ?
C412 C413 H41F 108.8 . . ?
H41E C413 H41F 107.7 . . ?
C414 C413 C412 113.7(10) . . ?
C414 C413 H41E 108.8 . . ?
C414 C413 H41F 108.8 . . ?
C413 C414 H41G 109.5 . . ?
C413 C414 H41H 109.5 . . ?
C413 C414 H41I 109.5 . . ?
H41G C414 H41H 109.5 . . ?
H41G C414 H41I 109.5 . . ?
H41H C414 H41I 109.5 . . ?
N4 C421 H42A 108.3 . . ?
N4 C421 H42B 108.3 . . ?
H42A C421 H42B 107.4 . . ?
C422 C421 N4 115.9(8) . . ?
C422 C421 H42A 108.3 . . ?
C422 C421 H42B 108.3 . . ?
C421 C422 H42C 110.0 . . ?
C421 C422 H42D 110.0 . . ?
C421 C422 C423 108.4(9) . . ?
H42C C422 H42D 108.4 . . ?
C423 C422 H42C 110.0 . . ?
C423 C422 H42D 110.0 . . ?
C422 C423 H42E 108.9 . . ?
C422 C423 H42F 108.9 . . ?
H42E C423 H42F 107.8 . . ?
C424 C423 C422 113.2(10) . . ?
C424 C423 H42E 108.9 . . ?
C424 C423 H42F 108.9 . . ?
C423 C424 H42G 109.5 . . ?
C423 C424 H42H 109.5 . . ?
C423 C424 H42I 109.5 . . ?
H42G C424 H42H 109.5 . . ?
H42G C424 H42I 109.5 . . ?
H42H C424 H42I 109.5 . . ?
N4 C431 H43A 108.1 . . ?
N4 C431 H43B 108.1 . . ?
H43A C431 H43B 107.3 . . ?
C432 C431 N4 116.6(11) . . ?
C432 C431 H43A 108.1 . . ?
C432 C431 H43B 108.1 . . ?
C433 C432 C431 104.0(14) . . ?
C434 C432 C431 139.3(18) . . ?
C432 C433 H43C 110.1 . . ?
C432 C433 H43D 110.1 . . ?
H43C C433 H43D 108.4 . . ?
C435 C433 C432 108.0(15) . . ?
C435 C433 H43C 110.1 . . ?
C435 C433 H43D 110.1 . . ?
C432 C434 H43E 110.1 . . ?
C432 C434 H43F 110.1 . . ?
C432 C434 C435 107.8(15) . . ?
H43E C434 H43F 108.5 . . ?
C435 C434 H43E 110.1 . . ?
C435 C434 H43F 110.1 . . ?
N4 C441 H44A 108.8 . . ?
N4 C441 H44B 108.8 . . ?
N4 C441 C442 113.6(10) . . ?
H44A C441 H44B 107.7 . . ?
C442 C441 H44A 108.8 . . ?
C442 C441 H44B 108.8 . . ?
C441 C442 H44C 107.0 . . ?
C441 C442 H44D 107.0 . . ?
H44C C442 H44D 106.8 . . ?
C443 C442 C441 121.1(12) . . ?
C443 C442 H44C 107.0 . . ?
C443 C442 H44D 107.0 . . ?
C442 C443 H443 121.1 . . ?
C442 C443 C444 117.9(15) . . ?
C444 C443 H443 121.1 . . ?
C443 C444 H44E 109.5 . . ?
C443 C444 H44F 109.5 . . ?
C443 C444 H44G 109.5 . . ?
H44E C444 H44F 109.5 . . ?
H44E C444 H44G 109.5 . . ?
H44F C444 H44G 109.5 . . ?

_refine_diff_density_max         1.711
_refine_diff_density_min         -1.121
_refine_diff_density_rms         0.188

_shelx_res_file                  
;
TITL pr771 in C2/c; 140K; Xcalibur
    pr771.res
    created by SHELXL-2018/3 at 18:37:02 on 04-Mar-2020
CELL  0.71073  37.2726  24.8482  28.2845   90.000  111.997   90.000
ZERR   16.000   0.0006   0.0005   0.0005    0.000    0.002    0.000
LATT  7
SYMM -X, Y, 1/2-Z
SFAC C   H      N   O    I   MO
UNIT 608 1174.4 128 11.2 128 96
 
LIST 4 ! automatically inserted. Change 6 to 4 for CHECKCIF!!
TEMP -133
 
L.S. 6
BOND $H
FMAP 2
PLAN 5
 
SADI 0.01 C241 C242  C242 C243  C243 C244  C242 C245  C245 C246 =
          C221 C222  C222 C223  C223 C224  C223 C225 =
          C431 C432  C432 C433  C432 C434  C433 C435  C434 C435 =
          C341 C342  C342 C343  C343 C344  C342 C345  C345 C346 =
          C331 C332  C332 C333  C333 C335  C332 C334  C334 C335
 
SADI 0.01 C342 C344  C342 C346
 
SIMU 0.01 0.01 C131 > C144
SIMU 0.01 0.01 C221 > C246
SIMU 0.01 0.01 C331 > C346
SIMU 0.005 0.007 N4 > C444
 
ISOR 0.01 0.01 C424 C144
 
SIMU 0.01 0.01 O1W O2W
 
OMIT 0
 
SHEL 99999 0.83
 
ACTA
 
SIZE 0.18 0.10 0.09
 
WGHT    0.041300  122.300003
FVAR       0.07558
MO11  6    0.398365    0.395314    0.328427    11.00000    0.01724    0.02513 =
         0.01668   -0.00092    0.00493    0.00435
MO12  6    0.429558    0.482455    0.303364    11.00000    0.01550    0.02609 =
         0.01744   -0.00256    0.00334    0.00257
MO13  6    0.408262    0.398350    0.239053    11.00000    0.01575    0.02601 =
         0.01850   -0.00331    0.00639    0.00089
MO14  6    0.336857    0.403105    0.240808    11.00000    0.01422    0.02612 =
         0.01801   -0.00218    0.00476    0.00174
MO15  6    0.357834    0.487018    0.304733    11.00000    0.01765    0.02636 =
         0.01886   -0.00245    0.00547    0.00473
MO16  6    0.368090    0.490478    0.216047    11.00000    0.01682    0.02676 =
         0.01746   -0.00042    0.00366    0.00115
I11   5    0.377080    0.306579    0.264299    11.00000    0.02295    0.02585 =
         0.02583   -0.00304    0.00990    0.00231
I12   5    0.389254    0.578956    0.280792    11.00000    0.02642    0.02611 =
         0.03084   -0.00226    0.00659    0.00304
I13   5    0.472649    0.388743    0.327940    11.00000    0.01688    0.03175 =
         0.02467   -0.00139    0.00412    0.00576
I14   5    0.293215    0.496618    0.214692    11.00000    0.01756    0.03224 =
         0.02718    0.00101    0.00415    0.00587
I15   5    0.441460    0.487026    0.212489    11.00000    0.02086    0.03531 =
         0.02348   -0.00095    0.00878   -0.00238
I16   5    0.324636    0.398226    0.331365    11.00000    0.02371    0.03283 =
         0.02575    0.00005    0.01320    0.00400
I17   5    0.420740    0.480460    0.396187    11.00000    0.02673    0.03347 =
         0.01820   -0.00486    0.00503    0.00429
I18   5    0.345102    0.405168    0.147513    11.00000    0.02339    0.03764 =
         0.01778   -0.00432    0.00488   -0.00225
C11   1    0.415190    0.341376    0.394743    11.00000    0.01990    0.04311 =
         0.02451   -0.00544    0.00506    0.00653
C12   1    0.482715    0.528471    0.338190    11.00000    0.02841    0.03779 =
         0.02929   -0.00291    0.01002    0.00938
C13   1    0.434815    0.347205    0.198560    11.00000    0.02739    0.02968 =
         0.03024   -0.00077    0.01319   -0.00331
C14   1    0.283824    0.356458    0.204938    11.00000    0.02496    0.02676 =
         0.03345    0.00341    0.01529    0.00655
C15   1    0.328115    0.538260    0.341265    11.00000    0.02992    0.02427 =
         0.02572    0.00374    0.00771    0.00245
C16   1    0.352795    0.546877    0.151814    11.00000    0.02769    0.04681 =
         0.02511   -0.00287    0.00579   -0.00650
N11   3    0.423671    0.315084    0.430111    11.00000    0.04698    0.04409 =
         0.02513    0.00195    0.00802    0.00590
N12   3    0.510669    0.553397    0.355855    11.00000    0.03713    0.04786 =
         0.03646   -0.01179    0.01170   -0.00092
N13   3    0.446036    0.320581    0.174075    11.00000    0.03664    0.04147 =
         0.05075   -0.00712    0.02341   -0.00426
N14   3    0.255978    0.332235    0.185471    11.00000    0.02501    0.04145 =
         0.04126   -0.00520    0.00844   -0.00054
N15   3    0.312213    0.565338    0.360064    11.00000    0.03662    0.04047 =
         0.03314    0.00210    0.01601    0.01182
N16   3    0.347424    0.578486    0.120453    11.00000    0.04416    0.04536 =
         0.03887    0.01332    0.00332   -0.00177
MO21  6    0.167343    0.413177    0.274589    11.00000    0.01954    0.02721 =
         0.02367    0.00165    0.00764    0.00516
MO22  6    0.153304    0.496976    0.210803    11.00000    0.01732    0.02517 =
         0.01944   -0.00205    0.00702    0.00212
MO23  6    0.106833    0.410990    0.185199    11.00000    0.01988    0.02617 =
         0.02266   -0.00349    0.00776    0.00129
MO24  6    0.080978    0.503611    0.209013    11.00000    0.01619    0.02632 =
         0.01963   -0.00099    0.00580    0.00317
MO25  6    0.095138    0.419552    0.272942    11.00000    0.02030    0.02830 =
         0.02439    0.00218    0.01020    0.00310
MO26  6    0.141482    0.505674    0.298447    11.00000    0.01891    0.02816 =
         0.01853   -0.00181    0.00595    0.00329
I21   5    0.091809    0.496168    0.117426    11.00000    0.02572    0.03671 =
         0.01918   -0.00073    0.00606    0.00213
I22   5    0.066698    0.514211    0.297954    11.00000    0.02448    0.03875 =
         0.02750   -0.00220    0.01340    0.00598
I23   5    0.181131    0.402445    0.185639    11.00000    0.02479    0.03421 =
         0.03151   -0.00565    0.01412    0.00465
I24   5    0.031672    0.416365    0.182471    11.00000    0.01953    0.03513 =
         0.03197   -0.00394    0.00754   -0.00251
I25   5    0.156423    0.420349    0.366296    11.00000    0.03033    0.04332 =
         0.02278    0.00725    0.00849    0.00730
I26   5    0.121248    0.322473    0.249518    11.00000    0.03436    0.02626 =
         0.04184    0.00197    0.01524    0.00325
I27   5    0.217185    0.500798    0.301948    11.00000    0.01824    0.03623 =
         0.02596   -0.00249    0.00464    0.00174
I28   5    0.127504    0.594031    0.233721    11.00000    0.02348    0.02579 =
         0.02838   -0.00226    0.00882    0.00225
C21   1    0.216728    0.360333    0.312755    11.00000    0.04040    0.04373 =
         0.03655   -0.00072    0.01877    0.00402
C22   1    0.187371    0.540966    0.175480    11.00000    0.01895    0.03573 =
         0.02312   -0.00370    0.00513    0.00307
C23   1    0.086383    0.356959    0.118825    11.00000    0.03052    0.03872 =
         0.02681   -0.00410    0.01230    0.00084
C24   1    0.030993    0.555827    0.171277    11.00000    0.03305    0.03215 =
         0.03741   -0.00421    0.02036    0.00034
C25   1    0.062701    0.373964    0.309834    11.00000    0.03609    0.04019 =
         0.03576    0.01338    0.01611    0.01371
C26   1    0.162442    0.557555    0.366391    11.00000    0.02809    0.04461 =
         0.02367   -0.00288    0.00725    0.01165
N21   3    0.242142    0.332485    0.333584    11.00000    0.04328    0.05452 =
         0.06190    0.01814    0.01517    0.02514
N22   3    0.205289    0.564715    0.157349    11.00000    0.03590    0.04357 =
         0.03376   -0.00218    0.01689   -0.00578
N23   3    0.075272    0.330354    0.083493    11.00000    0.04342    0.05353 =
         0.04191   -0.01855    0.02559   -0.01074
N24   3    0.005569    0.584021    0.151954    11.00000    0.02958    0.05318 =
         0.04392    0.00220    0.00675    0.01228
N25   3    0.046840    0.349973    0.330360    11.00000    0.04760    0.05921 =
         0.07432    0.03272    0.03439    0.01514
N26   3    0.174294    0.581696    0.403097    11.00000    0.04531    0.05495 =
         0.03871   -0.00952    0.00463    0.01513
N1    3    0.590529    0.156763    0.443928    11.00000    0.02112    0.03515 =
         0.02100   -0.00041    0.00666    0.00258
C111  1    0.552620    0.181260    0.441056    11.00000    0.03012    0.02766 =
         0.02845    0.00540    0.01454   -0.00029
AFIX  23
H11A  2    0.547760    0.169956    0.471691    11.00000   -1.20000
H11B  2    0.531660    0.165949    0.411004    11.00000   -1.20000
AFIX   0
C112  1    0.549807    0.242282    0.437371    11.00000    0.03501    0.04448 =
         0.02671   -0.00287    0.00965   -0.00257
AFIX  23
H11C  2    0.559228    0.255136    0.410955    11.00000   -1.20000
H11D  2    0.566188    0.258487    0.470392    11.00000   -1.20000
AFIX   0
C113  1    0.507484    0.259484    0.423539    11.00000    0.04474    0.04644 =
         0.02957   -0.00505    0.01582    0.01405
AFIX  23
H11E  2    0.497690    0.243336    0.448381    11.00000   -1.20000
H11F  2    0.506493    0.299091    0.426649    11.00000   -1.20000
AFIX   0
C114  1    0.481569    0.243457    0.371240    11.00000    0.04408    0.05026 =
         0.03800   -0.01100    0.00811    0.00828
AFIX 137
H11G  2    0.456091    0.260033    0.363062    11.00000   -1.50000
H11H  2    0.478840    0.204203    0.369493    11.00000   -1.50000
H11I  2    0.492689    0.255567    0.346685    11.00000   -1.50000
AFIX   0
C121  1    0.602087    0.177334    0.400981    11.00000    0.02498    0.03646 =
         0.02570   -0.00429    0.00916   -0.01111
AFIX  23
H12A  2    0.610867    0.215089    0.408464    11.00000   -1.20000
H12B  2    0.624360    0.155890    0.400592    11.00000   -1.20000
AFIX   0
C122  1    0.570391    0.175144    0.348285    11.00000    0.03801    0.01953 =
         0.02917   -0.00180    0.01905   -0.00833
AFIX  23
H12C  2    0.549195    0.200016    0.346598    11.00000   -1.20000
H12D  2    0.559651    0.138262    0.341223    11.00000   -1.20000
AFIX   0
C123  1    0.587092    0.191236    0.308479    11.00000    0.02964    0.03520 =
         0.01947    0.00280    0.00610    0.00529
AFIX  23
H12E  2    0.598935    0.227404    0.316803    11.00000   -1.20000
H12F  2    0.607666    0.165475    0.309636    11.00000   -1.20000
AFIX   0
C124  1    0.556246    0.191963    0.255195    11.00000    0.03575    0.04002 =
         0.03152   -0.00209    0.00923    0.00101
AFIX 137
H12G  2    0.568223    0.199855    0.230476    11.00000   -1.50000
H12H  2    0.537049    0.219747    0.253101    11.00000   -1.50000
H12I  2    0.543514    0.156756    0.247542    11.00000   -1.50000
AFIX   0
C131  1    0.585041    0.096242    0.438200    11.00000    0.03362    0.03460 =
         0.02769    0.00399    0.01264    0.00330
AFIX  23
H13A  2    0.562636    0.088910    0.406304    11.00000   -1.20000
H13B  2    0.608192    0.080563    0.434291    11.00000   -1.20000
AFIX   0
C132  1    0.578565    0.067436    0.481330    11.00000    0.06300    0.03618 =
         0.03673    0.00111    0.01877   -0.00188
AFIX  23
H13C  2    0.562147    0.089902    0.494039    11.00000   -1.20000
H13D  2    0.603715    0.061843    0.509765    11.00000   -1.20000
AFIX   0
C133  1    0.559173    0.013642    0.463730    11.00000    0.12224    0.05605 =
         0.05366    0.00381    0.03718   -0.01038
AFIX  23
H13E  2    0.554266   -0.002757    0.492638    11.00000   -1.20000
H13F  2    0.533652    0.020519    0.436426    11.00000   -1.20000
AFIX   0
C134  1    0.579030   -0.025612    0.444941    11.00000    0.16494    0.07889 =
         0.07748    0.00653    0.05037   -0.01796
AFIX 137
H13G  2    0.561430   -0.055415    0.429007    11.00000   -1.50000
H13H  2    0.601520   -0.039358    0.473348    11.00000   -1.50000
H13I  2    0.587645   -0.008759    0.419688    11.00000   -1.50000
AFIX   0
C141  1    0.622041    0.171526    0.494816    11.00000    0.02765    0.06205 =
         0.02002   -0.00334    0.00562    0.00014
AFIX  23
H14A  2    0.623431    0.211222    0.497965    11.00000   -1.20000
H14B  2    0.614687    0.157384    0.522651    11.00000   -1.20000
AFIX   0
C142  1    0.661864    0.150176    0.501807    11.00000    0.03130    0.08956 =
         0.03055   -0.01198    0.00338    0.00603
AFIX  23
H14C  2    0.660337    0.110832    0.495864    11.00000   -1.20000
H14D  2    0.670680    0.167076    0.476348    11.00000   -1.20000
AFIX   0
C143  1    0.690867    0.161839    0.554872    11.00000    0.03752    0.11883 =
         0.03668   -0.01825    0.00324    0.01418
AFIX  23
H14E  2    0.683426    0.142011    0.580165    11.00000   -1.20000
H14F  2    0.690534    0.200785    0.562079    11.00000   -1.20000
AFIX   0
C144  1    0.731469    0.145339    0.560205    11.00000    0.05736    0.13095 =
         0.06326   -0.02283    0.00402    0.02227
AFIX 137
H14G  2    0.750233    0.159674    0.592188    11.00000   -1.50000
H14H  2    0.737079    0.159718    0.531447    11.00000   -1.50000
H14I  2    0.733276    0.105987    0.560418    11.00000   -1.50000
AFIX   0
N2    3    0.526448    0.738060    0.421649    11.00000    0.04639    0.04187 =
         0.02989    0.01072    0.01808    0.00460
C211  1    0.522906    0.777475    0.459619    11.00000    0.07462    0.06622 =
         0.08901   -0.01130    0.04286   -0.01673
AFIX  23
H21A  2    0.497340    0.772206    0.462096    11.00000   -1.20000
H21B  2    0.542843    0.768620    0.493360    11.00000   -1.20000
AFIX   0
C212  1    0.526766    0.834114    0.449547    11.00000    0.09346    0.05578 =
         0.14706    0.01646    0.07886    0.00318
AFIX  23
H21C  2    0.509352    0.842197    0.414083    11.00000   -1.20000
H21D  2    0.553624    0.840802    0.452144    11.00000   -1.20000
AFIX   0
C213  1    0.517480    0.872749    0.485393    11.00000    0.07902    0.05599 =
         0.10970   -0.03343    0.05283   -0.02158
AFIX  23
H21E  2    0.515497    0.909672    0.471488    11.00000   -1.20000
H21F  2    0.491910    0.863121    0.486093    11.00000   -1.20000
AFIX   0
C214  1    0.545894    0.872671    0.537430    11.00000    0.13478    0.14391 =
         0.12124   -0.05808    0.06312   -0.08948
AFIX 137
H21G  2    0.539571    0.901097    0.557051    11.00000   -1.50000
H21H  2    0.571708    0.879174    0.537017    11.00000   -1.50000
H21I  2    0.545525    0.837690    0.553244    11.00000   -1.50000
AFIX   0
C221  1    0.493126    0.743055    0.370616    11.00000    0.07741    0.08713 =
         0.04429    0.01575    0.02128    0.00045
AFIX  23
H22A  2    0.468854    0.744540    0.377182    11.00000   -1.20000
H22B  2    0.495770    0.778038    0.355485    11.00000   -1.20000
AFIX   0
C222  1    0.488524    0.700857    0.331872    11.00000    0.08505    0.10887 =
         0.04880    0.00548    0.02394   -0.00131
AFIX  23
H22C  2    0.486486    0.665462    0.346742    11.00000   -1.20000
H22D  2    0.512046    0.700215    0.323512    11.00000   -1.20000
AFIX   0
C223  1    0.454149    0.708296    0.283879    11.00000    0.06870    0.11657 =
         0.04820   -0.00630    0.00890   -0.00745
PART 1  10.7
C224  1    0.450331    0.669956    0.242534    10.70000    0.07613    0.14230 =
         0.04860    0.00220    0.00891   -0.04302
AFIX 137
H22E  2    0.429972    0.682285    0.210936    10.70000   -1.50000
H22F  2    0.443548    0.634367    0.251607    10.70000   -1.50000
H22G  2    0.474933    0.667714    0.237559    10.70000   -1.50000
AFIX   0
PART 2  10.3
C225  1    0.464454    0.753139    0.257447    10.30000    0.05876    0.11318 =
         0.04658   -0.01528    0.01978    0.00485
AFIX 137
H22H  2    0.450336    0.749552    0.220595    10.30000   -1.50000
H22I  2    0.492346    0.752433    0.264998    10.30000   -1.50000
H22J  2    0.457545    0.787313    0.269134    10.30000   -1.50000
AFIX   0
PART 0
C231  1    0.528348    0.682031    0.443786    11.00000    0.15994    0.08263 =
         0.04142    0.00913    0.03145   -0.03570
AFIX  23
H23A  2    0.533568    0.656866    0.419987    11.00000   -1.20000
H23B  2    0.551392    0.681152    0.475938    11.00000   -1.20000
AFIX   0
C232  1    0.497492    0.660148    0.454667    11.00000    0.15636    0.08671 =
         0.05017    0.00268    0.03435   -0.04495
AFIX  23
H23C  2    0.474402    0.658046    0.422635    11.00000   -1.20000
H23D  2    0.491286    0.684782    0.478048    11.00000   -1.20000
AFIX   0
C233  1    0.505931    0.603083    0.479324    11.00000    0.14987    0.08962 =
         0.05156   -0.00509    0.03035   -0.04132
AFIX  23
H23E  2    0.506370    0.577389    0.452796    11.00000   -1.20000
H23F  2    0.532279    0.603634    0.506058    11.00000   -1.20000
AFIX   0
C234  1    0.482889    0.584379    0.499331    11.00000    0.16574    0.09176 =
         0.06250   -0.00650    0.02033   -0.03446
AFIX 137
H23G  2    0.486621    0.545415    0.503993    11.00000   -1.50000
H23H  2    0.456101    0.591854    0.476834    11.00000   -1.50000
H23J  2    0.488302    0.601547    0.532487    11.00000   -1.50000
AFIX   0
C241  1    0.564420    0.746294    0.414618    11.00000    0.04819    0.12909 =
         0.12327   -0.03491    0.03281    0.00037
AFIX  23
H24A  2    0.567839    0.715074    0.394964    11.00000   -1.20000
H24B  2    0.561161    0.778319    0.392572    11.00000   -1.20000
AFIX   0
C242  1    0.601180    0.753325    0.458486    11.00000    0.05706    0.16815 =
         0.13485   -0.03661    0.02273   -0.00298
PART 1  10.5
C243  1    0.629665    0.781234    0.441498    10.50000    0.06210    0.18563 =
         0.14261   -0.04197    0.02743    0.00807
AFIX  23
H24C  2    0.620082    0.818286    0.431434    10.50000   -1.20000
H24D  2    0.654212    0.784304    0.471453    10.50000   -1.20000
AFIX   0
C244  1    0.638897    0.757757    0.399185    10.50000    0.06310    0.18978 =
         0.14696   -0.03497    0.03428    0.00945
AFIX 137
H24E  2    0.666115    0.764672    0.405029    10.50000   -1.50000
H24F  2    0.622373    0.774238    0.366878    10.50000   -1.50000
H24G  2    0.634303    0.718848    0.397687    10.50000   -1.50000
AFIX   0
PART 2  10.5
C245  1    0.636087    0.768060    0.448539    10.50000    0.05980    0.18792 =
         0.14351   -0.04556    0.02635    0.01055
AFIX  23
H24H  2    0.651953    0.735091    0.453144    10.50000   -1.20000
H24I  2    0.627465    0.778057    0.412081    10.50000   -1.20000
AFIX   0
C246  1    0.661959    0.811187    0.478021    10.50000    0.07558    0.19050 =
         0.15107   -0.03528    0.02649    0.00373
AFIX 137
H24J  2    0.684678    0.813269    0.468581    10.50000   -1.50000
H24K  2    0.670266    0.803354    0.514526    10.50000   -1.50000
H24L  2    0.648141    0.845619    0.470563    10.50000   -1.50000
AFIX   0
PART 0
N3    3    0.240070    0.193855    0.246606    11.00000    0.03668    0.02749 =
         0.06521    0.00086    0.01619   -0.00109
C311  1    0.207744    0.229950    0.213277    11.00000    0.04540    0.04731 =
         0.07439    0.01473    0.01589    0.00226
AFIX  23
H31A  2    0.218582    0.255731    0.195458    11.00000   -1.20000
H31B  2    0.197773    0.251024    0.235446    11.00000   -1.20000
AFIX   0
C312  1    0.173751    0.200174    0.173335    11.00000    0.03394    0.06383 =
         0.12327    0.01826    0.01025   -0.01116
AFIX  23
H31C  2    0.184329    0.172624    0.156826    11.00000   -1.20000
H31D  2    0.159171    0.181061    0.191156    11.00000   -1.20000
AFIX   0
C313  1    0.146800    0.233839    0.133691    11.00000    0.10448    0.05250 =
         0.07443    0.00648    0.01463   -0.00636
AFIX  23
H31E  2    0.161313    0.253829    0.116312    11.00000   -1.20000
H31F  2    0.135306    0.260569    0.149844    11.00000   -1.20000
AFIX   0
C314  1    0.114718    0.202753    0.094479    11.00000    0.09435    0.07383 =
         0.07867   -0.00757   -0.00349   -0.01035
AFIX 137
H31G  2    0.096059    0.227911    0.071404    11.00000   -1.50000
H31H  2    0.101667    0.180245    0.111600    11.00000   -1.50000
H31I  2    0.125529    0.179854    0.074889    11.00000   -1.50000
AFIX   0
C321  1    0.270861    0.229630    0.282589    11.00000    0.06097    0.02497 =
         0.06836   -0.00608    0.02109   -0.00319
AFIX  23
H32A  2    0.260196    0.247717    0.305659    11.00000   -1.20000
H32B  2    0.277439    0.257895    0.262513    11.00000   -1.20000
AFIX   0
C322  1    0.307895    0.200081    0.314830    11.00000    0.04192    0.04856 =
         0.08579   -0.02070    0.00791   -0.00516
AFIX  23
H32C  2    0.300994    0.166155    0.327724    11.00000   -1.20000
H32D  2    0.322528    0.190666    0.293120    11.00000   -1.20000
AFIX   0
C323  1    0.333589    0.233719    0.359841    11.00000    0.07308    0.05507 =
         0.05261   -0.00123    0.01099   -0.00372
AFIX  23
H32E  2    0.341359    0.267182    0.347221    11.00000   -1.20000
H32F  2    0.319025    0.243822    0.381456    11.00000   -1.20000
AFIX   0
C324  1    0.368704    0.202476    0.390597    11.00000    0.10986    0.08471 =
         0.12981    0.00260   -0.00175   -0.01973
AFIX 137
H32G  2    0.382261    0.221029    0.422988    11.00000   -1.50000
H32H  2    0.385911    0.199399    0.371683    11.00000   -1.50000
H32I  2    0.361039    0.166450    0.397352    11.00000   -1.50000
AFIX   0
C331  1    0.256441    0.159396    0.214368    11.00000    0.04151    0.07041 =
         0.07055   -0.01880    0.02300   -0.00382
AFIX  23
H33A  2    0.278721    0.138244    0.237141    11.00000   -1.20000
H33B  2    0.236383    0.133847    0.193481    11.00000   -1.20000
AFIX   0
C332  1    0.269065    0.193627    0.180440    11.00000    0.07474    0.11256 =
         0.09389    0.01445    0.03933    0.00972
PART 1  10.7
C333  1    0.286566    0.171802    0.146156    10.70000    0.09096    0.11500 =
         0.09352    0.01098    0.03595    0.02530
AFIX  23
H33C  2    0.267274    0.149222    0.120021    10.70000   -1.20000
H33D  2    0.308605    0.148430    0.165890    10.70000   -1.20000
AFIX   0
PART 2  10.3
C334  1    0.304415    0.212902    0.174350    10.30000    0.08494    0.11277 =
         0.09485    0.01479    0.03735    0.02043
AFIX  23
H33E  2    0.326239    0.188983    0.193638    10.30000   -1.20000
H33F  2    0.310581    0.249482    0.189039    10.30000   -1.20000
AFIX   0
PART 0
C335  1    0.300518    0.214446    0.120267    11.00000    0.08799    0.11748 =
         0.09312    0.02757    0.05415    0.01761
C341  1    0.224765    0.155042    0.276136    11.00000    0.07332    0.05766 =
         0.11257    0.01956    0.06022    0.00569
AFIX  23
H34A  2    0.207819    0.128389    0.252020    11.00000   -1.20000
H34B  2    0.246886    0.135233    0.300901    11.00000   -1.20000
AFIX   0
C342  1    0.202648    0.181054    0.304160    11.00000    0.12922    0.09771 =
         0.13087    0.00652    0.07979   -0.00230
PART 1  10.6
C343  1    0.218991    0.183432    0.360275    10.60000    0.15333    0.10862 =
         0.15070   -0.00262    0.07985   -0.00470
AFIX  23
H34C  2    0.241624    0.207838    0.372264    10.60000   -1.20000
H34D  2    0.227352    0.147203    0.374783    10.60000   -1.20000
AFIX   0
C344  1    0.187809    0.203999    0.376054    10.60000    0.16315    0.11039 =
         0.15234   -0.00740    0.08440   -0.00158
AFIX 137
H34E  2    0.198519    0.230835    0.403099    10.60000   -1.50000
H34F  2    0.176771    0.174124    0.388764    10.60000   -1.50000
H34G  2    0.167534    0.220629    0.346725    10.60000   -1.50000
AFIX   0
PART 2  10.4
C345  1    0.202607    0.151148    0.349108    10.40000    0.15233    0.10469 =
         0.14703   -0.00477    0.08245   -0.00310
AFIX  23
H34H  2    0.197569    0.112470    0.340907    10.40000   -1.20000
H34I  2    0.182321    0.165277    0.360465    10.40000   -1.20000
AFIX   0
C346  1    0.241394    0.158732    0.389441    10.40000    0.15872    0.10436 =
         0.15198   -0.00508    0.07799    0.00052
AFIX 137
H34J  2    0.252508    0.123570    0.402796    10.40000   -1.50000
H34K  2    0.239102    0.180427    0.417109    10.40000   -1.50000
H34L  2    0.258249    0.177217    0.375120    10.40000   -1.50000
AFIX   0
PART 0
N4    3    0.296798    0.497506    0.488080    11.00000    0.05674    0.13780 =
         0.03517    0.00799    0.02581    0.01108
C411  1    0.277473    0.488006    0.526780    11.00000    0.04962    0.13931 =
         0.03703    0.01776    0.02036    0.01032
AFIX  23
H41A  2    0.286096    0.452623    0.543195    11.00000   -1.20000
H41B  2    0.286932    0.515794    0.553710    11.00000   -1.20000
AFIX   0
C412  1    0.234061    0.489045    0.505705    11.00000    0.04823    0.14774 =
         0.04648    0.02374    0.01819    0.01017
AFIX  23
H41C  2    0.223972    0.462097    0.478083    11.00000   -1.20000
H41D  2    0.224819    0.524993    0.491132    11.00000   -1.20000
AFIX   0
C413  1    0.219032    0.476563    0.547763    11.00000    0.05341    0.16190 =
         0.05653    0.03552    0.02119    0.00823
AFIX  23
H41E  2    0.229348    0.441217    0.562954    11.00000   -1.20000
H41F  2    0.229025    0.504063    0.574884    11.00000   -1.20000
AFIX   0
C414  1    0.177619    0.475356    0.530510    11.00000    0.07505    0.18303 =
         0.07708    0.03677    0.01939    0.00697
AFIX 137
H41G  2    0.169948    0.467234    0.559308    11.00000   -1.50000
H41H  2    0.167472    0.447536    0.504302    11.00000   -1.50000
H41I  2    0.167142    0.510475    0.516133    11.00000   -1.50000
AFIX   0
C421  1    0.340302    0.498959    0.519896    11.00000    0.04812    0.14599 =
         0.03855    0.00259    0.01919    0.01354
AFIX  23
H42A  2    0.345253    0.527857    0.545664    11.00000   -1.20000
H42B  2    0.347680    0.464435    0.538502    11.00000   -1.20000
AFIX   0
C422  1    0.366448    0.508120    0.490492    11.00000    0.04585    0.15785 =
         0.04640   -0.00589    0.01662    0.01578
AFIX  23
H42C  2    0.359589    0.542374    0.471315    11.00000   -1.20000
H42D  2    0.363267    0.478491    0.465847    11.00000   -1.20000
AFIX   0
C423  1    0.409097    0.510253    0.529253    11.00000    0.04526    0.16493 =
         0.05779   -0.00914    0.01794    0.01463
AFIX  23
H42E  2    0.414036    0.478714    0.552208    11.00000   -1.20000
H42F  2    0.426659    0.507691    0.510360    11.00000   -1.20000
AFIX   0
C424  1    0.418360    0.560839    0.560986    11.00000    0.06097    0.16228 =
         0.07114   -0.01514    0.01891    0.00194
AFIX 137
H42G  2    0.446049    0.561621    0.582095    11.00000   -1.50000
H42H  2    0.403376    0.561453    0.583000    11.00000   -1.50000
H42I  2    0.411676    0.592329    0.538490    11.00000   -1.50000
AFIX   0
C431  1    0.287215    0.452940    0.449993    11.00000    0.08441    0.14626 =
         0.05307   -0.00274    0.02687    0.00384
AFIX  23
H43A  2    0.258858    0.452830    0.431033    11.00000   -1.20000
H43B  2    0.299431    0.461055    0.425177    11.00000   -1.20000
AFIX   0
C432  1    0.299110    0.398122    0.470258    11.00000    0.11444    0.15520 =
         0.08118   -0.00817    0.02813   -0.00213
PART 1  10.5
C433  1    0.262484    0.371880    0.466115    10.50000    0.11697    0.15695 =
         0.08774   -0.01165    0.02739   -0.00173
AFIX  23
H43C  2    0.255807    0.381558    0.495777    10.50000   -1.20000
H43D  2    0.241205    0.383911    0.434697    10.50000   -1.20000
AFIX   0
PART 2  10.5
C434  1    0.297380    0.342372    0.451472    10.50000    0.11809    0.15768 =
         0.08729   -0.01198    0.02776   -0.00339
AFIX  23
H43E  2    0.322893    0.324719    0.467650    10.50000   -1.20000
H43F  2    0.290369    0.342309    0.414074    10.50000   -1.20000
AFIX   0
PART 0
C435  1    0.267786    0.313210    0.464610    11.00000    0.12223    0.16055 =
         0.09520   -0.01315    0.02544   -0.00576
C441  1    0.283818    0.549202    0.459779    11.00000    0.07627    0.13926 =
         0.04281    0.02219    0.03046    0.00592
AFIX  23
H44A  2    0.255247    0.548920    0.443150    11.00000   -1.20000
H44B  2    0.294460    0.551554    0.432601    11.00000   -1.20000
AFIX   0
C442  1    0.296308    0.599334    0.493801    11.00000    0.11297    0.14450 =
         0.05908    0.02425    0.03681    0.00437
AFIX  23
H44C  2    0.279832    0.601091    0.514260    11.00000   -1.20000
H44D  2    0.323107    0.592902    0.518028    11.00000   -1.20000
AFIX   0
C443  1    0.295660    0.650574    0.472695    11.00000    0.14142    0.15302 =
         0.07665    0.02068    0.02990   -0.01535
AFIX  43
H443  2    0.285619    0.655799    0.436811    11.00000   -1.20000
AFIX   0
C444  1    0.310914    0.695646    0.507637    11.00000    0.15216    0.15701 =
         0.08991    0.01179    0.02165   -0.02405
AFIX 137
H44E  2    0.301471    0.729551    0.489553    11.00000   -1.50000
H44F  2    0.339255    0.695076    0.520561    11.00000   -1.50000
H44G  2    0.302251    0.692553    0.536240    11.00000   -1.50000
AFIX   0
PART 1
O1W   4    0.584520    0.614644    0.401089    10.60000    0.03518    0.07557 =
         0.09129   -0.05692    0.00447   -0.00223
PART 2
O2W   4    0.573342    0.624764    0.363168    10.40000    0.03677    0.07722 =
         0.10861   -0.04589    0.02312    0.00465
PART 0
O3W   4    0.387156    0.393221    0.483524    10.40000    0.09258    0.12289 =
         0.06990   -0.00949    0.02776    0.03871
HKLF 4
 
 
 
 
REM  pr771 in C2/c; 140K; Xcalibur
REM wR2 = 0.0979, GooF = S = 1.053, Restrained GooF = 1.066 for all data
REM R1 = 0.0393 for 16412 Fo > 4sig(Fo) and 0.0647 for all 22210 data
REM 1188 parameters refined using 619 restraints
 
END
 
WGHT      0.0413    122.3730
 
REM Highest difference peak  1.711,  deepest hole -1.121,  1-sigma level  0.188
Q1    1   0.4692  0.6173  0.4485  11.00000  0.05    1.71
Q2    1   0.3657  0.3079  0.3511  11.00000  0.05    1.36
Q3    1   0.0905  0.4612  0.1295  11.00000  0.05    1.31
Q4    1   0.3868  0.3122  0.1730  11.00000  0.05    1.22
Q5    1   0.1787  0.1997  0.3092  11.00000  0.05    1.21
;
_shelx_res_checksum              72712

_shelx_hkl_file                  
;
   0   0  -3 7.70819 8.16996   3
   0   0  -4 26757.9 161.773   3
   0   0  -5 9.86108 12.7507   3
   0   0  -6 2448.44 61.6017   3
   0   0  -7 9.43218 16.0134   3
   0   0  -8 5772.67 105.841   3
   0   0  -9-1.41560 16.6736   3
   0   0 -10 9098.92 148.874   3
   0   0 -11 17.4462 19.5650   3
   0   0 -12 5120.59 122.827   3
   0   0 -13-6.04118 20.5418   3
   0   0 -14-33.8874 21.3155   3
   0   0 -15-1.71745 17.2344   3
   0   0 -16 203.368 32.6427   3
   0   0 -17 7.11564 17.4876   3
   0   0 -18 246.620 39.2340   3
   0   0 -19 14.0976 19.1451   3
   0   0 -20-17.7532 29.0393   3
   0   0 -21-41.6300 33.9245   3
   0   0 -22-4.37769 25.7668   3
   0   0 -23-64.5272 39.0538   3
   0   0 -24-4.20995 27.3213   3
   0   0 -25-44.5622 28.9743   3
   0   0 -26 511.115 63.9199   3
   0   0 -27 18.4034 25.5490   3
   0   0 -28 258.855 48.4338   3
   0   0 -29 16.9488 29.8340   3
   0   0 -30 129.066 39.4235   3
   0   0 -31 110.772 44.0005   3
   0   2   2 53168.3 193.592   3
   0  -2  -2 54119.5 194.785   3
   0   2   3 7866.39 83.0433   3
   0  -2  -3 8020.03 83.5725   3
   0  -2  -4 3698.43 64.1276   3
   0   2   4 3540.79 62.5509   3
   0   2   5 3133.15 65.0921   3
   0  -2  -5 3123.46 65.6046   3
   0   2   6 6890.41 102.317   3
   0  -2  -6 6833.86 103.004   3
   0  -2  -7 5281.06 96.3432   3
   0   2   7 5231.76 96.7690   3
   0  -2  -8 9701.06 139.102   3
   0   2   8 9716.72 139.001   3
   0   2   9 4.08541 13.5331   3
   0  -2  -9 56.3351 24.4157   3
   0   2  10 41622.3 319.748   3
   0  -2 -10 40409.4 312.122   3
   0   2  11 5850.10 125.525   3
   0  -2 -11 5918.05 128.033   3
   0  -2 -12 31787.4 303.416   3
   0  -2 -13 9560.42 173.452   3
   0   2 -14 5958.03 146.982   3
   0  -2 -14 5895.61 143.820   3
   0  -2 -15 6452.32 154.566   3
   0   2 -15 6397.27 157.553   3
   0   2 -16 1848.59 91.2122   3
   0  -2 -16 1922.57 90.7893   3
   0   2 -17 1503.10 82.3985   3
   0  -2 -17 1505.20 81.6940   3
   0  -2 -18 227.402 34.6298   3
   0   2 -18 236.165 37.4541   3
   0   2 -19 128.320 31.0531   3
   0  -2 -19 111.817 27.6722   3
   0   2 -20 721.456 62.6087   3
   0  -2 -20 722.161 63.0933   3
   0  -2 -21 1341.23 87.9038   3
   0   2 -21 1406.83 89.8361   3
   0  -2 -22 1624.90 98.9601   3
   0   2 -22 1785.71 103.368   3
   0  -2 -23 589.280 63.4281   3
   0   2 -23 603.622 63.7962   3
   0   2 -24 218.370 38.8004   3
   0  -2 -24 209.053 43.7017   3
   0   2 -25 12.3710 24.0569   3
   0  -2 -25-8.40876 30.1793   3
   0   2 -26 162.769 34.8835   3
   0  -2 -26 123.345 37.7155   3
   0  -2 -27 438.401 62.3478   3
   0   2 -27 386.358 61.1192   3
   0   2 -28 140.578 42.9759   3
   0  -2 -28 174.030 43.3023   3
   0  -2 -29 83.3940 34.5883   3
   0   2 -29 84.4310 34.0100   3
   0  -2 -30-4.05558 31.0528   3
   0   2 -30 44.7771 36.1942   3
   0   2 -31 226.037 55.6067   3
   0  -2 -31 201.329 52.0100   3
   0  -4   0 3444.46 64.4174   3
   0   4   0 3403.72 63.8566   3
   0  -4  -1 15412.5 136.843   3
   0   4   1 14662.2 131.717   3
   0   4  -1 15363.3 135.852   3
   0  -4   1 15429.2 135.232   3
   0   4   2 261.058 19.6927   3
   0   4  -2 244.569 20.1117   3
   0  -4  -2 254.724 22.1351   3
   0  -4   2 255.347 20.7331   3
   0   4   3 145.648 18.0235   3
   0   4  -3 146.581 17.2738   3
   0  -4  -3 163.638 20.2358   3
   0  -4   3 160.544 14.2293   1
   0  -4   4 726.608 21.8394   1
   0   4   4 725.550 34.1301   3
   0  -4  -4 716.770 35.1682   3
   0  -4   5 11722.4 80.6511   1
   0   4   5 11847.2 137.663   3
   0   4  -5 11891.2 83.8552   1
   0   4   6 3982.49 84.6360   3
   0   4  -6 3776.93 47.8414   1
   0  -4  -6 3835.46 85.5186   3
   0   4   7 4802.99 98.7048   3
   0   4  -7 4825.44 54.7956   1
   0  -4  -7 4859.73 98.6640   3
   0   4   8 3115.85 83.3745   3
   0  -4  -8 3133.43 84.7413   3
   0   4  -8 3154.65 46.1491   1
   0  -4  -9 2896.96 84.7152   3
   0   4   9 2872.79 84.1042   3
   0  -4  -9 2810.07 37.2468   2
   0  -4 -10 50488.9 174.900   2
   0  -4 -10 51030.6 366.296   3
   0   4  10 51598.7 370.269   3
   0   4  11 375.121 35.3785   3
   0  -4 -11 380.509 37.0716   3
   0  -4 -12 54585.3 413.678   3
   0   4  12 56155.0 421.104   3
   0  -4 -13 57.4501 25.2418   3
   0   4  13 74.4039 20.9886   3
   0   4  14 15122.0 235.001   3
   0  -4 -14 14625.5 230.702   3
   0  -4 -15 865.392 60.2555   3
   0   4  15 893.046 60.7183   3
   0   4  16 695.308 46.2089   3
   0  -4 -16 1970.09 93.1900   3
   0  -4 -17 92.8830 26.7713   3
   0  -4 -18 555.592 54.8531   3
   0   4 -19 277.199 44.7844   3
   0  -4 -19 192.172 37.7117   3
   0   4 -20 7962.44 209.732   3
   0  -4 -20 8099.21 208.241   3
   0   4 -21 1368.57 94.6932   3
   0  -4 -21 1330.47 94.3658   3
   0  -4 -22 11884.2 265.949   3
   0   4 -22 11606.6 260.981   3
   0  -4 -23 2126.88 117.592   3
   0   4 -23 2140.09 121.046   3
   0  -4 -24 2755.57 138.067   3
   0   4 -24 2956.92 140.583   3
   0  -4 -25 33.6443 30.0840   3
   0   4 -25 89.7895 39.3526   3
   0   4 -26 27.4959 25.7376   3
   0  -4 -26 52.4780 15.7114   2
   0  -4 -26 13.3973 26.1182   3
   0   4 -27 282.006 51.8633   3
   0  -4 -27 336.138 54.5767   3
   0  -4 -28 2.02944 28.7864   3
   0   4 -28-50.7728 31.3929   3
   0   4 -29 81.2171 40.4904   3
   0  -4 -29 94.2265 30.3422   3
   0  -4 -30-15.9630 31.8394   3
   0   4 -30 1.18230 28.4703   3
   0  -4 -31 78.8046 39.2743   3
   0   4 -31 14.1160 25.0564   3
   0  -6   0 1893.13 60.4166   3
   0   6   0 1761.49 59.3385   3
   0  -6  -1 5751.76 102.928   3
   0   6   1 5532.40 99.9518   3
   0  -6   1 5821.79 102.197   3
   0   6  -1 5604.18 101.498   3
   0  -6  -2 34.4760 18.7131   3
   0  -6   2 20.1724 16.9541   3
   0   6   2 32.5720 13.6012   3
   0   6  -2 51.5519 16.5768   3
   0  -6  -3 6.08179 18.0469   3
   0  -6   3 6.60424 16.7513   3
   0   6  -3-3.25522 13.6007   3
   0   6   3 16.4825 14.2043   3
   0  -6   4 6448.19 83.0952   1
   0   6   4 6683.45 112.237   3
   0   6  -4 6986.36 117.288   3
   0  -6  -4 7037.08 117.173   3
   0  -6   5 11090.5 105.281   1
   0  -6  -5 11704.9 154.393   3
   0   6  -5 11731.3 156.689   3
   0  -6  -6 4175.17 97.9260   3
   0  -6   6 4218.87 61.7921   1
   0   6   6 4323.87 96.7851   3
   0   6   7 10956.4 161.276   3
   0  -6  -7 11398.5 164.089   3
   0  -6   7 10972.1 95.6631   1
   0   6   8 3897.03 99.7037   3
   0  -6  -8 3911.83 100.214   3
   0   6  -8 3986.11 58.7542   1
   0   6  -9 69.6782 10.4415   1
   0  -6  -9 50.4650 19.5572   3
   0   6   9 81.5617 20.9946   3
   0  -6 -10 35901.5 323.979   3
   0   6 -10 36341.6 178.447   1
   0   6  10 36713.6 328.489   3
   0  -6 -11 2392.26 87.3967   3
   0   6  11 2345.01 87.2026   3
   0   6 -11 2360.00 46.5298   1
   0  -6 -12 25715.6 293.080   3
   0   6 -12 25551.2 156.346   1
   0   6  12 27210.3 302.416   3
   0  -6 -13 1787.75 80.9775   3
   0   6  13 2001.48 86.0741   3
   0   6 -13 1882.75 44.2096   1
   0   6  14 3169.07 111.555   3
   0   6 -14 3201.63 58.7262   1
   0  -6 -14 3036.97 109.764   3
   0   6  15 174.625 30.0910   3
   0  -6 -15 132.988 26.2701   3
   0   6 -15 183.687 15.8477   1
   0  -6 -15 197.351 12.1025   2
   0   6 -16 236.554 17.5984   1
   0  -6 -16 244.115 14.2991   2
   0   6  16 236.295 33.3765   3
   0  -6 -16 250.307 34.9083   3
   0  -6 -17 14.1137 5.82610   2
   0   6 -17 21.8685 8.78182   1
   0  -6 -17 9.07292 19.3690   3
   0   6  17 3.30365 16.8071   3
   0  -6 -18 516.209 22.8256   2
   0   6 -18 489.377 26.9917   1
   0  -6 -18 464.616 50.8880   3
   0  -6 -19 278.927 44.8542   3
   0   6 -19 226.833 20.4980   1
   0  -6 -19 218.158 16.6520   2
   0   6 -20 14497.9 151.448   1
   0  -6 -20 15145.8 285.776   3
   0  -6 -20 14313.1 127.252   2
   0  -6 -21 516.802 71.7387   3
   0   6 -21 244.467 23.8821   1
   0  -6 -21 212.334 18.5231   2
   0   6 -22 18736.6 336.774   3
   0  -6 -22 19381.0 155.757   2
   0  -6 -22 21042.8 356.828   3
   0   6 -22 19897.3 183.597   1
   0  -6 -23 475.813 72.5085   3
   0   6 -23 511.287 72.8240   3
   0   6 -24 6031.61 201.456   3
   0   6 -24 5555.80 100.853   1
   0  -6 -24 5456.37 84.7226   2
   0  -6 -24 6055.16 201.761   3
   0   6 -25 492.117 31.3088   1
   0  -6 -25 476.583 25.4792   2
   0  -6 -25 649.534 73.7061   3
   0   6 -25 621.966 75.0025   3
   0  -6 -26 327.095 55.4381   3
   0   6 -26 322.736 51.9559   3
   0  -6 -27 73.3768 30.2283   3
   0   6 -27 52.4776 30.2068   3
   0  -6 -28 37.8489 29.0582   3
   0   6 -28 6.34922 28.9412   3
   0   6 -29-2.06198 26.9731   3
   0  -6 -29-26.0160 36.3130   3
   0   6 -30-3.00695 28.8308   3
   0  -6 -30-24.2034 33.3262   3
   0  -6 -31-6.60537 34.3018   3
   0   6 -31-61.0060 37.1903   3
   0   8   0 20180.9 220.888   3
   0  -8   0 20577.8 224.614   3
   0  -8   1 8168.48 140.917   3
   0   8   1 7788.41 137.662   3
   0  -8  -1 8224.06 142.533   3
   0   8  -1 8020.47 140.693   3
   0  -8  -2 5359.01 116.913   3
   0   8   2 5113.44 109.505   3
   0  -8   2 5281.01 112.800   3
   0   8  -2 5185.15 116.218   3
   0  -8  -3 1214.51 58.1675   3
   0  -8   3 1209.97 57.0143   3
   0   8  -3 1211.84 58.3681   3
   0   8   3 1236.63 55.0255   3
   0   8  -4 38.0419 18.4347   3
   0  -8  -4 71.6931 23.0482   3
   0   8   4 50.3143 16.6594   3
   0  -8   4 41.2284 18.5836   3
   0  -8   5 6999.77 99.5170   1
   0   8  -5 7476.30 140.025   3
   0  -8  -5 7218.37 136.957   3
   0   8   5 7053.25 133.541   3
   0   8  -6 3891.46 103.188   3
   0   8   6 3807.65 100.069   3
   0  -8   6 3701.83 71.8442   1
   0  -8  -6 3754.17 104.502   3
   0   8   7 11426.3 177.737   3
   0  -8  -7 11880.6 182.863   3
   0   8  -7 11954.5 186.592   3
   0  -8   7 11614.5 120.974   1
   0   8   8 13356.3 196.648   3
   0  -8   8 12977.6 122.291   1
   0  -8  -8 13592.2 201.435   3
   0  -8   9 1022.59 34.0546   1
   0   8   9 1022.66 58.9762   3
   0  -8  -9 1122.19 62.8502   3
   0   8   9 1052.69 24.0765   2
   0   8  10 30656.6 318.687   3
   0  -8 -10 30540.6 316.672   3
   0   8  11 7979.92 168.413   3
   0  -8 -11 7653.73 163.552   3
   0   8  12 15211.1 238.266   3
   0  -8 -12 14816.7 234.162   3
   0  -8 -13 3139.08 112.518   3
   0   8 -13 3105.99 57.0707   1
   0   8  13 3246.86 113.948   3
   0   8  14 1956.55 91.1444   3
   0  -8 -14 1820.45 88.1339   3
   0   8 -14 1863.59 45.1236   1
   0   8  15 1449.13 80.3778   3
   0  -8 -15 1319.74 78.3529   3
   0   8 -15 1406.02 39.2263   1
   0   8  16 842.166 65.1078   3
   0  -8 -16 793.149 63.6353   3
   0   8 -16 885.341 31.6249   1
   0   8 -17 1096.85 35.3579   1
   0  -8 -17 990.836 72.1344   3
   0  -8 -18 128.837 29.1224   3
   0   8 -18 175.243 15.0222   1
   0  -8 -19 61.6064 26.1779   3
   0   8 -19 63.7469 9.48396   1
   0   8 -20 1644.96 44.1994   1
   0  -8 -20 1527.39 95.3173   3
   0   8 -21 2460.26 54.5698   1
   0  -8 -21 2595.54 129.741   3
   0   8 -22 6936.50 90.7471   1
   0  -8 -22 6898.62 211.302   3
   0   8 -23 734.422 29.3197   1
   0  -8 -23 862.311 81.4498   3
   0  -8 -24 3260.39 151.285   3
   0   8 -24 3131.46 58.3972   1
   0  -8 -25-2.05119 29.4780   3
   0   8 -25 50.3841 33.4187   3
   0   8 -26 343.305 53.3987   3
   0  -8 -26 350.370 58.3788   3
   0   8 -27-9.03927 26.8639   3
   0  -8 -27-22.6689 23.6452   3
   0  -8 -28 20.3183 28.1017   3
   0   8 -28 56.6633 35.6371   3
   0  -8 -29-8.94233 27.7356   3
   0   8 -29 10.1910 27.2707   3
   0   8 -30 96.9495 33.9256   3
   0  -8 -30 31.1064 29.2636   3
   0  10   0 153229. 677.856   3
   0 -10   0 155599. 680.578   3
   0  10   1 272.638 35.5930   3
   0 -10   1 288.951 42.9360   3
   0 -10  -1 342.789 42.0365   3
   0  10  -1 218.404 33.0224   3
   0  10  -2 81056.7 496.418   3
   0 -10  -2 81244.7 499.686   3
   0 -10   2 76306.2 483.008   3
   0  10   2 76515.3 476.921   3
   0  10  -3 700.737 47.6679   3
   0 -10  -3 688.225 46.6390   3
   0  10   3 679.985 47.1676   3
   0 -10   3 704.644 47.3016   3
   0 -10   4 10858.4 182.384   3
   0  10  -4 11851.3 193.089   3
   0 -10  -4 11305.0 191.373   3
   0  10   4 11063.9 179.819   3
   0 -10  -5 15.7307 18.4407   3
   0  10   5-8.42630 19.2840   3
   0 -10   5 73.9104 20.0459   1
   0  10  -5 20.0571 16.3228   3
   0 -10   6 634.207 35.8326   1
   0 -10  -6 557.525 45.7624   3
   0  10   6 564.604 42.8746   3
   0  10  -6 652.510 48.9087   3
   0 -10  -7 51.2709 20.8477   3
   0 -10   7 86.3190 15.2379   1
   0  10  -7 117.067 26.7288   3
   0  10   7 77.8092 20.0368   3
   0 -10   8 1753.94 54.0716   1
   0 -10  -8 1863.54 83.1997   3
   0  10  -8 1955.96 84.0725   3
   0  10   8 1830.37 79.2529   3
   0 -10   9 2662.50 63.8460   1
   0 -10  -9 2896.05 103.868   3
   0  10  -9 3039.59 107.644   3
   0  10   9 2842.43 101.609   3
   0  10  10 6002.67 66.0927   2
   0 -10 -10 6449.82 156.101   3
   0 -10  10 6172.79 93.0659   1
   0  10 -10 6889.87 164.547   3
   0  10  10 6449.70 156.383   3
   0  10  11 2404.22 36.1866   2
   0 -10 -11 2650.52 103.692   3
   0  10  11 2645.71 103.068   3
   0 -10 -12 1258.32 74.5241   3
   0  10  12 1287.36 75.3887   3
   0  10  13 81.1604 25.3242   3
   0 -10 -13 36.6455 18.0115   3
   0  10  14 68.8014 24.1267   3
   0 -10 -14 46.4857 22.4271   3
   0 -10 -15 842.248 66.5811   3
   0  10  15 958.917 68.4099   3
   0 -10 -16-6.32008 22.6366   3
   0 -10 -17 4103.97 149.391   3
   0 -10 -18 70.3433 24.2412   3
   0 -10 -19 597.262 59.1188   3
   0 -10 -20-22.2722 28.9923   3
   0 -10 -21 666.175 63.8170   3
   0 -10 -22 165.084 32.9004   3
   0 -10 -23 208.353 41.5081   3
   0 -10 -24 21.9242 27.7553   3
   0 -10 -25 52.0863 31.8093   3
   0 -10 -26 26.7944 26.9933   3
   0 -10 -27 120.450 36.8586   3
   0 -10 -28 48.7058 32.3438   3
   0  10 -28 88.4887 42.8964   3
   0 -10 -29-41.7686 35.9997   3
   0  10 -29-25.5101 31.0147   3
   0 -10 -30-53.3723 39.0085   3
   0  10 -30-23.7197 39.8355   3
   0 -12   0 99566.7 599.673   3
   0  12   0 98021.8 600.188   3
   0 -12  -1 32889.2 347.050   3
   0  12   1 32328.8 342.617   3
   0 -12   1 33049.0 345.419   3
   0  12  -1 31991.4 348.439   3
   0  12   2 37372.8 368.155   3
   0 -12   2 37912.1 370.665   3
   0  12  -2 39421.4 382.617   3
   0 -12  -2 39293.9 382.859   3
   0 -12  -3 3659.42 118.946   3
   0 -12   3 3558.71 114.182   3
   0  12  -3 3660.58 119.475   3
   0  12   3 3490.79 112.874   3
   0  12   4 5320.09 140.627   3
   0 -12  -4 5284.98 144.058   3
   0  12  -4 5687.54 149.181   3
   0 -12   4 5268.08 138.663   3
   0 -12  -5 211.241 30.8202   3
   0  12   5 215.126 30.5692   3
   0  12  -5 225.752 31.3918   3
   0 -12   5 201.522 28.2052   3
   0  12  -6 315.531 38.0921   3
   0 -12  -6 253.972 36.5655   3
   0  12   6 232.644 32.3971   3
   0 -12   6 272.093 28.7693   1
   0 -12   7 106.526 19.9162   1
   0 -12  -7 77.2691 24.1971   3
   0  12  -7 115.305 26.0032   3
   0  12   7 90.1990 20.5365   3
   0  12   8 431.137 42.2824   3
   0 -12   8 455.114 33.1639   1
   0  12  -8 502.942 46.8477   3
   0 -12  -8 454.154 45.0195   3
   0 -12   9 12.3543 10.6402   1
   0  12  -9 7.07006 15.8772   3
   0 -12  -9-11.5543 19.3056   3
   0  12   9-2.09325 16.8322   3
   0 -12 -10 7104.29 175.228   3
   0  12  10 7355.35 176.274   3
   0  12 -10 7702.58 184.860   3
   0 -12  10 6887.79 114.208   1
   0  12 -11 1110.47 73.1953   3
   0  12  11 922.993 30.1842   2
   0  12  11 970.253 66.6475   3
   0 -12 -11 942.178 68.6818   3
   0 -12  11 950.256 41.6735   1
   0  12 -12 12020.2 239.027   3
   0  12  12 11247.0 225.984   3
   0 -12 -12 11063.3 228.426   3
   0  12 -13 3851.12 138.509   3
   0 -12 -13 3598.50 132.493   3
   0  12  13 3784.70 134.845   3
   0  12  14 3985.06 141.114   3
   0 -12 -14 3858.24 139.510   3
   0 -12 -15 746.833 63.5696   3
   0 -12 -16-46.1370 30.1248   3
   0 -12 -17 115.130 27.1566   3
   0 -12 -18-22.3979 29.6063   3
   0 -12 -19 126.375 36.3865   3
   0 -12 -20-81.4624 41.9543   3
   0 -12 -21-60.4183 37.7778   3
   0 -12 -22-65.6313 37.8687   3
   0 -12 -23-24.6515 29.3807   3
   0 -12 -24 11.0458 22.9710   3
   0 -12 -25-7.87243 26.7713   3
   0 -12 -26 76.6195 37.1677   3
   0 -12 -27 704.714 80.2424   3
   0 -12 -28 314.197 60.9988   3
   0 -12 -29 446.596 69.5901   3
   0 -14   0 1556.52 85.8426   3
   0  14   0 1565.94 83.2678   3
   0  14   1 12941.9 236.798   3
   0  14  -1 12862.6 234.585   3
   0 -14  -1 12509.2 233.250   3
   0 -14   1 12834.5 234.287   3
   0  14  -2 1296.44 75.6507   3
   0 -14  -2 1296.04 77.3394   3
   0 -14   2 1143.09 72.2375   3
   0  14   2 1220.47 74.4625   3
   0 -14  -3 11.3907 21.5478   3
   0  14   3 15.6573 18.3121   3
   0  14  -3 23.5422 23.0570   3
   0 -14   3-5.01196 22.5192   3
   0  14  -4 391.684 43.6697   3
   0  14   4 362.651 41.1649   3
   0 -14  -4 410.481 47.0008   3
   0 -14   4 364.122 42.7333   3
   0  14  -5 3462.20 127.149   3
   0  14   5 3104.16 115.910   3
   0 -14  -5 3253.25 124.509   3
   0 -14   5 3055.90 115.373   3
   0 -14   6 92.5300 22.5851   1
   0  14   6 52.2464 20.9822   3
   0 -14  -6 43.1720 22.8887   3
   0  14  -6 89.0367 28.9261   3
   0 -14  -7 875.420 66.1356   3
   0  14   7 885.196 63.4679   3
   0 -14   7 790.016 47.8018   1
   0  14  -7 980.083 69.8946   3
   0 -14  -8 518.978 50.8131   3
   0  14   8 518.829 48.7864   3
   0  14  -8 614.751 57.2872   3
   0 -14   8 514.602 38.8162   1
   0 -14  -9 905.941 69.6363   3
   0  14  -9 974.928 70.8151   3
   0  14   9 873.251 65.6842   3
   0 -14   9 862.381 47.4527   1
   0  14 -10 19401.8 314.357   3
   0  14  10 17663.4 287.891   3
   0 -14  10 17012.5 200.651   1
   0 -14 -10 18509.6 302.814   3
   0 -14 -11 700.364 64.5672   3
   0  14 -11 722.402 67.6759   3
   0  14  11 651.195 60.5389   3
   0 -14  11 619.165 39.1850   1
   0 -14  12 30307.9 250.155   1
   0 -14 -12 31819.6 404.999   3
   0  14  12 30240.5 186.202   2
   0 -14 -13 221.435 46.7185   3
   0  14  13 149.228 11.1322   2
   0 -14 -14 13628.9 277.290   3
   0 -14 -15 589.117 61.3722   3
   0 -14 -16 1492.59 96.6475   3
   0 -14 -17 33.1435 22.4493   3
   0 -14 -18-5.98759 21.3600   3
   0 -14 -19 127.881 38.1723   3
   0 -14 -20 106.198 38.5298   3
   0 -14 -21 140.687 43.7630   3
   0 -14 -22 393.810 61.6038   3
   0 -14 -23 892.918 86.8307   3
   0 -14 -24 183.778 42.1615   3
   0 -14 -25 211.398 45.6001   3
   0 -14 -26-86.6727 44.3968   3
   0 -14 -27 378.595 60.9206   3
   0 -14 -28 11.7373 29.5719   3
   0 -16   0-29.4984 26.9387   3
   0  16   0-16.9308 21.2185   3
   0  16   1 354.836 43.9421   3
   0  16  -1 365.678 44.9643   3
   0 -16  -1 269.077 40.2589   3
   0 -16   1 268.669 42.4236   3
   0  16   2 21.6514 20.0545   3
   0 -16   2 19.8681 21.0607   3
   0  16  -2 35.7448 19.6204   3
   0 -16  -2 1.01773 24.3612   3
   0  16  -3 369.906 48.9102   3
   0 -16   3 318.461 43.3580   3
   0 -16  -3 305.624 43.1005   3
   0  16   3 335.946 43.2543   3
   0 -16   4 610.459 56.5327   3
   0  16   4 623.733 57.9107   3
   0  16  -4 697.622 62.6430   3
   0 -16  -4 655.148 61.1646   3
   0 -16   5 9.34386 21.7535   3
   0  16   5 16.7623 19.3863   3
   0  16  -5-11.3307 18.8858   3
   0 -16  -5 2.98233 21.6249   3
   0  16  -6 841.974 71.1497   3
   0 -16   6 685.725 49.8639   1
   0 -16  -6 736.196 66.2623   3
   0  16   6 727.039 60.6662   3
   0 -16  -7 1006.56 76.7932   3
   0  16   7 910.694 70.6822   3
   0  16  -7 1018.93 75.7591   3
   0 -16   7 912.000 56.5993   1
   0  16   8-7.85103 26.9592   3
   0 -16   8 16.1827 15.8460   1
   0 -16  -8 21.8088 21.0975   3
   0  16  -8 13.3051 23.5349   3
   0 -16   9 214.447 27.3656   1
   0 -16  -9 259.686 44.4196   3
   0 -16 -10 4405.32 160.040   3
   0 -16  10 4014.36 107.570   1
   0 -16 -11 4759.66 167.797   3
   0 -16  11 4362.90 108.889   1
   0 -16  12 6743.33 130.162   1
   0 -16 -12 7396.08 209.922   3
   0 -16  13 3393.64 90.2731   1
   0 -16 -13 3553.79 149.765   3
   0  16  13 3379.68 65.5869   2
   0  16  14 2633.51 47.0804   2
   0 -16 -14 2873.16 135.176   3
   0 -16 -15 377.942 53.1054   3
   0 -16 -16 128.250 33.6190   3
   0 -16 -17-51.8505 30.7619   3
   0 -16 -18 15.4432 31.3765   3
   0 -16 -19 80.2483 38.0975   3
   0 -16 -20 560.131 73.2431   3
   0 -16 -21 469.956 76.0767   3
   0 -16 -22 4301.75 191.509   3
   0 -16 -23 2048.78 136.815   3
   0 -16 -24 3410.44 177.146   3
   0 -16 -25 1365.40 114.464   3
   0 -16 -26 349.949 62.6354   3
   0 -16 -27 103.056 44.0900   3
   0 -18   0 116.437 33.6868   3
   0 -18   1 13.7866 21.2823   3
   0 -18  -1 35.5864 26.7960   3
   0 -18  -2 11.1773 22.9331   3
   0 -18   2 21.6726 24.2657   3
   0 -18   3 15.6668 24.7422   3
   0 -18  -3 12.4178 25.8839   3
   0 -18   4 10.5887 23.2898   3
   0 -18  -4 18.3578 21.9958   3
   0 -18  -5 1713.99 104.240   3
   0 -18   5 1639.00 99.6731   3
   0 -18  -6 1347.13 93.3937   3
   0 -18   6 1208.51 70.8264   1
   0 -18  -7 3093.66 138.779   3
   0 -18   7 2775.92 103.863   1
   0 -18  -8 1876.59 110.313   3
   0 -18   8 1511.57 76.2448   1
   0 -18   9 33.1621 17.2387   1
   0 -18  -9 58.7002 31.7930   3
   0 -18  10 853.378 55.1137   1
   0 -18 -10 1098.01 90.0634   3
   0 -18 -11 1301.74 96.4166   3
   0 -18  11 1120.19 61.9220   1
   0 -18  12 410.299 37.6322   1
   0 -18 -12 661.418 73.3335   3
   0 -18 -13 482.934 62.0941   3
   0 -18  13 362.611 33.8866   1
   0 -18  14 38.6647 13.7117   1
   0 -18 -14 47.8716 29.5888   3
   0  18  14 51.3849 11.1169   2
   0  18  15 19.1304 6.54341   2
   0 -18 -15-0.69976 23.7968   3
   0 -18 -16 51.1979 24.8925   3
   0 -18 -17 100.057 32.2969   3
   0 -18 -18 65.8128 29.6411   3
   0 -18 -19 9.70984 26.6192   3
   0 -18 -20 445.055 67.5504   3
   0 -18 -21 168.808 53.8289   3
   0 -18 -22 4380.60 197.374   3
   0 -18 -23 168.494 51.8096   3
   0 -18 -24 4682.34 210.418   3
   0 -18 -25 65.8569 42.4530   3
   0 -20   0 7149.77 217.019   3
   0 -20  -1 99.3331 36.4280   3
   0 -20   1 120.996 38.7216   3
   0 -20   2 4255.74 166.034   3
   0 -20  -2 4441.26 170.574   3
   0 -20   3 55.1452 28.7689   3
   0 -20  -3 56.7206 25.3106   3
   0 -20  -4 382.118 51.1900   3
   0 -20   4 307.763 40.3998   3
   0 -20  -5-57.3162 38.0725   3
   0 -20   5-154.749 46.4962   3
   0 -20   6 414.973 47.2796   1
   0 -20  -6 376.004 52.4317   3
   0 -20  -7 2.96544 25.8135   3
   0 -20   7 7.58273 16.6074   1
   0 -20   8 505.021 49.1692   1
   0 -20  -8 584.907 68.8693   3
   0 -20  -9 569.351 69.6792   3
   0 -20   9 359.391 40.9852   1
   0 -20  10 57.2771 20.5513   1
   0 -20 -10 67.5841 38.4986   3
   0 -20 -11 328.872 55.8767   3
   0 -20  11 261.545 33.4064   1
   0 -20  12 4.35161 15.1158   1
   0 -20 -12-37.2551 30.2130   3
   0 -20 -13-37.1288 33.0156   3
   0 -20  13 14.0826 15.4445   1
   0 -20  14-18.1915 17.8393   1
   0 -20 -14-43.5450 36.8983   3
   0 -20 -15-9.97861 36.8025   3
   0 -20 -16-27.1959 31.7191   3
   0 -20 -17 1422.93 112.342   3
   0 -20 -18-28.5929 39.1622   3
   0 -20 -19 698.189 80.1241   3
   0 -20 -20-18.8498 39.4340   3
   0 -20 -21-36.0052 34.5150   3
   0 -20 -22 476.083 72.7994   3
   0 -20 -23 759.185 91.5259   3
   0 -22   0 6684.83 220.244   3
   0 -22  -1 3054.07 150.832   3
   0 -22   1 2981.25 146.035   3
   0 -22   2 5003.90 186.861   3
   0 -22  -2 5373.60 198.567   3
   0 -22  -3 685.024 73.7705   3
   0 -22   3 504.322 61.5661   3
   0 -22  -4 2048.64 125.866   3
   0 -22   4 1515.99 101.913   3
   0 -22   5 56.1206 27.4000   1
   0 -22  -5-73.0929 43.2358   3
   0 -22   6 237.701 40.5828   1
   0 -22  -6 136.598 34.4343   3
   0 -22   7-16.4980 21.9040   1
   0 -22  -7-18.8878 29.1619   3
   0 -22   8 74.6640 22.1225   1
   0 -22  -8 61.6336 29.3692   3
   0 -22  -9 171.714 46.9953   3
   0 -22   9 121.994 26.1201   1
   0 -22  10-54.6829 24.9673   1
   0 -22 -10 35.5942 35.1793   3
   0 -22 -11-20.3924 26.2709   3
   0 -22  11-29.6718 24.1852   1
   0 -22  12 324.086 37.8666   1
   0 -22 -12 459.967 65.9318   3
   0 -22 -13 189.939 47.9337   3
   0 -22 -14 413.485 64.2811   3
   0 -22 -15 26.5600 34.3233   3
   0 -22 -16 116.052 42.5182   3
   0 -22 -17 969.759 97.4170   3
   0 -22 -18 148.953 48.0160   3
   0 -22 -19 270.297 55.2903   3
   0 -22 -20-18.4753 36.3703   3
   0 -22 -21 86.1308 34.7788   3
   0 -24   0 218.265 53.6611   3
   0 -24   1 2002.74 126.631   3
   0 -24  -1 2281.61 138.238   3
   0 -24   2 216.442 48.0591   3
   0 -24  -2 221.678 51.6151   3
   0 -24   3 329.540 54.9762   3
   0 -24  -3 418.884 61.1164   3
   0 -24   4 58.8872 29.4456   3
   0 -24  -4 125.707 40.0527   3
   0 -24   5 11.6489 34.0367   3
   0 -24  -5 69.7777 35.7004   3
   0 -24  -6 16.2007 27.3956   3
   0 -24  -7-24.3862 35.0303   3
   0 -24  -8-19.6451 34.1715   3
   0 -24  -9 3.14387 28.6190   3
   0 -24 -10 815.874 89.4464   3
   0 -24 -11 185.985 51.7577   3
   0 -24 -12 3219.89 175.006   3
   0 -24 -13 134.255 51.8833   3
   0 -24 -14 2423.65 156.718   3
   0 -24 -15-10.6445 30.5668   3
   0 -24 -16 77.2468 37.1693   3
   0 -24 -17 7.41777 30.5433   3
   0 -24 -18-15.2222 39.5355   3
   0 -24 -19 50.0274 32.1321   3
   0 -26   0 7.88128 29.2828   3
   0 -26  -1 96.6967 38.4264   3
   0 -26   1-25.7286 28.4589   3
   0 -26   2 28.4217 28.0322   3
   0 -26  -2 36.5013 36.1212   3
   0 -26  -3-20.7642 34.2185   3
   0 -26   3 69.8519 39.2550   3
   0 -26   4 40.9402 33.6582   3
   0 -26  -4 40.1171 34.2793   3
   0 -26  -5 13.1053 27.7632   3
   0 -26   5 30.3888 36.4711   3
   0 -26  -6-53.6937 41.4721   3
   0 -26  -7-65.4249 44.5481   3
   0 -26  -8-66.9466 50.0796   3
   0 -26  -9 37.6863 31.4927   3
   0 -26 -10 321.139 61.4940   3
   0 -26 -11 976.206 101.298   3
   0 -26 -12 1604.14 131.327   3
   0 -26 -13 1216.17 115.587   3
   0 -26 -14 1284.58 120.240   3
   0 -26 -15 302.537 63.6958   3
   0 -26 -16 354.089 63.5466   3
   0 -28   0-15.0766 36.7488   3
   0 -28  -1 63.9068 35.0507   3
   0 -28   1 22.2616 27.7364   3
   0 -28   2 13.9854 30.4580   3
   0 -28  -2 60.5673 40.8870   3
   0 -28   3-21.7199 30.9062   3
   0 -28  -3-57.7293 31.8770   3
   0 -28  -4 1.63471 32.6913   3
   0 -28   4 3.47661 27.4905   3
   0 -28  -5-4.92911 31.2052   3
   0 -28  -6 89.1672 47.2013   3
   0 -28  -7 53.7104 39.2367   3
   0 -28  -8 24.5586 33.2448   3
   0 -28  -9 15.6939 32.1157   3
   0 -28 -10 84.3198 45.0785   3
   0 -28 -11 258.813 60.9363   3
   0 -28 -12 47.7291 42.8439   3
   0 -30   0 22.9623 32.8702   3
   0 -30  -1 101.585 45.4296   3
   0 -30   1 115.582 48.0541   3
   0 -30   2-31.2056 38.1472   3
   0 -30  -2-17.3739 30.6168   3
   0 -30  -3-12.3905 37.2951   3
   0 -30   3-16.0549 36.5846   3
   0 -30  -4 27.1052 30.4317   3
   0 -30   4-31.6430 35.0167   3
   1  -1 -32 5343.93 225.418   3
   1   1 -32 5182.97 224.724   3
   1   1 -31 327.658 65.4368   3
   1  -1 -31 353.244 65.3997   3
   1   1 -30 275.128 55.3077   3
   1  -1 -30 271.070 52.5603   3
   1  -1 -29 820.995 85.1486   3
   1   1 -29 783.604 82.5074   3
   1   1 -28 20.2699 28.5930   3
   1  -1 -28 54.3448 33.6784   3
   1   1 -27 418.317 60.3582   3
   1  -1 -27 336.063 54.0653   3
   1  -1 -26-32.5237 28.9417   3
   1   1 -26-1.55722 27.8079   3
   1   1 -25 28.4861 25.7864   3
   1  -1 -25 20.7131 23.5859   3
   1   1 -24-11.6293 24.7039   3
   1  -1 -24 13.4648 20.3276   3
   1   1 -23 549.653 59.2922   3
   1  -1 -23 492.616 56.7856   3
   1   1 -22 1.24229 19.7230   3
   1  -1 -22 30.1244 25.0159   3
   1   1 -21 971.450 73.8427   3
   1  -1 -21 937.256 71.8487   3
   1  -1 -20-14.9184 25.1876   3
   1   1 -20-7.12821 19.5129   3
   1  -1 -19 293.133 41.0254   3
   1   1 -19 340.738 43.7024   3
   1   1 -18 1348.36 79.2712   3
   1  -1 -18 1302.01 78.3492   3
   1   1 -17 1944.15 93.8905   3
   1  -1 -17 1806.38 88.7618   3
   1  -1 -16 2853.28 108.465   3
   1   1 -16 2991.52 109.859   3
   1   1 -15 1797.70 81.6955   3
   1  -1 -15 1745.58 82.6621   3
   1   1 -14 390.123 39.1352   3
   1  -1 -14 384.808 39.0000   3
   1  -1 -13 25.9878 17.8868   3
   1   1 -13 7.73090 15.7902   3
   1  -1 -12 9251.14 162.946   3
   1   1 -12 8885.87 164.202   3
   1  -1 -11 154.960 26.4984   3
   1   1 -11 174.794 28.4975   3
   1  -1 -10 4010.54 99.1717   3
   1  -1  -9 59.7002 21.1770   3
   1  -1  -8 1393.66 53.7299   3
   1  -1  -7 8.72613 15.2457   3
  -1   1   7-9.98020 13.7362   3
  -1   1   6-16.9248 13.2220   3
   1  -1  -6 9.76881 13.6820   3
  -1   1   5 25.3205 10.8709   3
   1  -1  -5 19.5200 12.5920   3
   1  -1  -4 113.018 12.8222   3
  -1   1   4 110.465 12.3306   3
  -1   1   3 8.33862 5.45408   3
   1  -1  -3 5.67063 6.92125   3
  -1  -1  -2 489.987 17.9781   3
  -1  -1  -3 338.898 17.9535   3
   1   1   3 324.801 17.6992   3
  -1  -1  -4-5.40428 10.5301   3
   1   1   4 1.06082 8.51474   3
   1   1   5 532.736 27.9099   3
  -1  -1  -5 527.918 28.2036   3
   1   1   6 45.0060 14.0306   3
  -1  -1  -6 33.3282 14.5977   3
   1   1   7-2.11815 12.0664   3
  -1  -1  -7 4.77790 15.9212   3
  -1  -1  -8 108.012 22.2584   3
  -1  -1  -9 374.042 32.2496   3
  -1   1 -10 159.609 24.8747   3
  -1  -1 -10 148.629 24.8088   3
  -1   1 -11 4166.63 109.030   3
  -1  -1 -11 4152.07 109.291   3
  -1   1 -12 71.3142 22.0348   3
  -1  -1 -12 84.3866 20.7990   3
  -1  -1 -13 2064.43 82.9587   3
  -1   1 -13 1994.07 82.1660   3
  -1  -1 -14 555.182 46.7859   3
  -1   1 -14 495.557 43.5146   3
  -1  -1 -15 1136.47 67.0648   3
  -1   1 -15 1153.41 67.8986   3
  -1   1 -16 5845.03 156.603   3
  -1  -1 -16 5868.25 154.677   3
  -1   1 -17 49.5460 26.7473   3
  -1  -1 -17 62.9110 26.4219   3
  -1   1 -18 1795.64 94.1665   3
  -1  -1 -18 1765.80 93.2290   3
  -1  -1 -19-13.5571 20.5450   3
  -1   1 -19-0.64246 20.7651   3
  -1  -1 -20 380.064 46.4915   3
  -1   1 -20 429.141 49.0371   3
  -1  -1 -21-0.39095 25.3502   3
  -1   1 -21-35.3762 30.1790   3
  -1  -1 -22 446.798 52.0373   3
  -1   1 -22 464.188 54.7218   3
  -1   1 -23-32.7636 28.1361   3
  -1  -1 -23 1.31504 21.7436   3
  -1  -1 -24 62.4351 25.8342   3
  -1   1 -24 73.1105 26.4666   3
  -1  -1 -25 21.4813 24.2187   3
  -1   1 -25-1.69720 27.1090   3
  -1   1 -26 3040.83 151.780   3
  -1  -1 -26 2817.39 146.293   3
  -1   1 -27 307.129 53.7751   3
  -1  -1 -27 274.764 53.4123   3
  -1   1 -28 2215.54 133.779   3
  -1  -1 -28 2113.35 133.205   3
  -1  -1 -29 175.528 45.8175   3
  -1   1 -29 187.567 47.1324   3
  -1   1 -30 1064.76 100.433   3
  -1  -1 -30 1103.53 102.470   3
  -1   1 -31 2001.04 140.743   3
  -1  -1 -31 2048.40 143.571   3
   1  -3 -32 4995.77 219.092   3
   1   3 -32 4867.76 215.239   3
   1   3 -31 66.4816 35.2401   3
   1  -3 -31 87.7086 44.0810   3
   1  -3 -30 1134.06 101.663   3
   1   3 -30 1045.44 97.4610   3
   1   3 -29 602.184 73.7333   3
   1  -3 -29 564.830 73.9469   3
   1  -3 -28 278.111 50.4774   3
   1   3 -28 252.652 49.0558   3
   1   3 -27 245.563 47.2103   3
   1  -3 -27 297.073 52.4812   3
   1  -3 -26 176.008 40.4862   3
   1   3 -26 186.836 41.2269   3
   1  -3 -25 803.973 76.5902   3
   1   3 -25 867.698 82.0169   3
   1   3 -24 6168.27 198.137   3
   1  -3 -24 6183.35 200.076   3
   1   3 -23 6535.67 201.110   3
   1  -3 -23 6568.86 202.320   3
   1   3 -22 9513.71 233.505   3
   1  -3 -22 9341.03 235.321   3
   1   3 -21 7170.46 196.892   3
   1  -3 -21 6973.54 198.506   3
   1  -3 -20 1209.41 82.0252   3
   1   3 -20 1236.95 84.6576   3
   1   3 -19 504.076 53.9452   3
   1  -3 -19 442.974 49.2120   3
   1  -3 -18-16.1650 22.7775   3
   1   3 -18 79.3017 29.4813   3
   1  -3 -17 2108.38 96.5265   3
   1   3 -17 2252.99 102.826   3
   1  -3 -16 524.102 47.3774   3
   1  -3 -15 881.893 58.7168   3
   1  -3 -14 3175.82 107.397   3
  -1   3  14 2894.88 95.9272   3
   1  -3 -13 1247.79 65.2703   3
  -1   3  13 1183.08 64.2465   3
   1  -3 -12 5317.19 127.502   3
  -1   3  12 5437.78 129.788   3
   1  -3 -11 1980.60 75.4278   3
  -1   3  11 1955.53 74.2352   3
   1  -3 -10 2121.61 74.6290   3
  -1   3  10 2237.86 76.4765   3
  -1   3   9 925.222 47.5467   3
   1  -3  -9 884.279 48.0179   3
   1  -3  -8 458.111 34.9506   3
  -1   3   8 406.879 31.6106   3
   1  -3  -7 926.944 43.6095   3
  -1   3   7 906.861 41.5297   3
  -1   3   6 1685.63 52.6048   3
   1   3  -6 1641.23 33.9557   1
   1  -3  -6 1686.80 53.2890   3
   1  -3  -5 955.827 38.6114   3
   1   3  -5 961.323 24.9440   1
  -1   3   5 959.530 37.3685   3
  -1   3   4 124.860 15.2757   3
   1   3  -4 127.541 10.3274   1
   1  -3  -4 146.957 18.2296   3
  -1  -3   4 137.765 11.0592   1
   1   3  -3 288.504 14.6531   1
   1  -3  -3 281.665 19.5422   3
  -1   3   3 267.509 18.6214   3
  -1  -3   3 269.122 13.9682   1
  -1  -3   2 594.852 25.1164   3
  -1  -3   2 593.342 20.6660   1
  -1   3   2 567.148 24.0805   3
   1  -3  -2 581.648 24.7617   3
   1   3  -2 603.091 25.0762   3
   1   3  -1 477.882 21.9510   3
   1  -3  -1 460.429 22.2590   3
  -1  -3   1 469.207 21.9778   3
  -1   3   1 441.899 21.2459   3
  -1  -3   0 38.5327 11.1216   3
  -1   3   0 31.9565 8.93951   3
   1   3   0 34.2288 9.19454   3
   1  -3   0 29.4898 9.86995   3
  -1  -3  -1 571.936 24.3916   3
   1   3   1 563.126 23.5556   3
   1  -3   1 608.904 24.7678   3
  -1   3  -1 594.873 24.3159   3
   1   3   2 772.945 28.4640   3
  -1  -3  -2 784.420 29.1764   3
  -1   3  -2 789.388 29.6483   3
   1   3   3 4.95735 9.18865   3
  -1  -3  -3 3.50995 11.8892   3
   1   3   4 995.646 37.0760   3
  -1  -3  -4 965.165 37.8088   3
   1   3   5 246.472 21.8442   3
  -1  -3  -5 235.900 22.2866   3
   1   3   6 315.757 26.0360   3
  -1  -3  -6 331.909 14.2497   2
  -1  -3  -6 338.361 26.8534   3
  -1  -3  -7 824.812 23.1518   2
  -1  -3  -7 812.661 42.4802   3
   1   3   7 830.568 41.6191   3
  -1  -3  -8-24.1242 19.7272   3
   1   3   8-0.26780 14.1899   3
   1   3   9 570.628 38.6787   3
  -1  -3  -9 566.254 40.1215   3
  -1  -3 -10 4129.52 104.633   3
   1   3  10 4137.80 105.922   3
  -1  -3 -11 3970.58 107.083   3
   1   3  11 4189.44 108.739   3
  -1  -3 -12 2623.99 91.2988   3
   1   3  12 2736.62 92.6405   3
  -1  -3 -13 3660.29 112.955   3
   1   3  13 3764.28 117.537   3
  -1  -3 -14 3291.62 109.432   3
  -1  -3 -15 761.514 56.8798   3
  -1   3 -16 2027.82 84.1377   3
  -1  -3 -16 2213.23 96.4790   3
  -1  -3 -17-3.00071 20.6263   3
  -1   3 -17 4.25954 18.8998   3
  -1  -3 -18 73.7827 23.9381   3
  -1   3 -18 78.2902 29.3533   3
  -1   3 -19 131.400 34.2968   3
  -1  -3 -19 95.7610 30.8773   3
  -1  -3 -20 6350.59 185.977   3
  -1   3 -20 6619.88 186.000   3
  -1  -3 -21 271.078 48.5625   3
  -1   3 -21 266.539 52.3167   3
  -1  -3 -22 3873.72 152.613   3
  -1   3 -22 3944.50 154.354   3
  -1   3 -23 199.871 47.0788   3
  -1  -3 -23 158.061 36.5069   3
  -1   3 -24 246.185 46.9602   3
  -1  -3 -24 178.163 35.7909   3
  -1   3 -25 722.103 74.5108   3
  -1  -3 -25 675.033 70.9983   3
  -1  -3 -26 712.327 74.1299   3
  -1   3 -26 664.532 71.6618   3
  -1  -3 -27 1229.43 99.9257   3
  -1   3 -27 1211.74 101.371   3
  -1   3 -28 429.643 62.9832   3
  -1  -3 -28 465.418 64.9300   3
  -1   3 -29 47.7528 27.2053   3
  -1  -3 -29 94.1103 41.1010   3
  -1  -3 -30 23.5905 30.4263   3
  -1   3 -30 54.9913 34.6484   3
  -1   3 -31 3915.51 190.992   3
  -1  -3 -31 3911.45 194.695   3
   1   5 -31 7.97348 33.9339   3
   1  -5 -31 55.0703 33.3656   3
   1   5 -30-20.7491 34.0622   3
   1  -5 -30 1.01191 28.6432   3
   1  -5 -29-87.7476 41.3484   3
   1   5 -29-13.8686 32.0049   3
   1  -5 -28-24.8976 32.7660   3
   1   5 -28 12.4641 25.5991   3
   1   5 -27-42.0657 32.0833   3
   1  -5 -27 11.4890 26.8704   3
   1  -5 -26 2851.35 68.9089   2
   1  -5 -26 3019.65 147.935   3
   1   5 -26 3044.04 148.667   3
   1  -5 -25 190.437 61.9039   3
   1   5 -25 297.079 65.2754   3
   1  -5 -25 66.9845 16.6920   2
   1   5 -24 28506.3 429.958   3
   1  -5 -24 27129.5 207.288   2
   1  -5 -24 28112.6 426.338   3
   1   5 -23 790.359 82.9433   3
   1  -5 -23 805.768 94.0749   3
   1  -5 -22 42799.5 251.074   2
   1   5 -22 46353.6 520.816   3
   1  -5 -22 44489.1 508.453   3
   1  -5 -21 1381.58 101.012   3
   1  -5 -21 948.183 38.0915   2
   1   5 -21 1378.84 101.801   3
   1  -5 -20 16914.9 298.201   3
   1  -5 -20 16059.1 145.220   2
   1  -5 -19 942.524 71.9828   3
   1  -5 -19 830.224 32.7519   2
   1  -5 -18 708.375 60.9555   3
   1  -5 -18 705.806 28.6096   2
  -1   5  18 775.643 59.4018   3
  -1   5  17-5.70256 15.3680   3
   1  -5 -17 5.22685 17.3788   3
   1  -5 -17 13.9049 6.49456   2
  -1   5  16 21.1482 17.1699   3
   1  -5 -16 31.3515 21.2889   3
   1  -5 -16 45.5868 8.60631   2
   1  -5 -15 3.99125 5.33494   2
   1  -5 -15-14.7007 22.5980   3
  -1   5  15-24.1106 19.8841   3
   1  -5 -14 557.442 19.6733   2
  -1   5  14 562.791 47.9340   3
   1  -5 -14 502.117 44.9940   3
  -1   5  13-25.4481 20.9959   3
   1  -5 -13 5.51134 4.36614   2
   1  -5 -13-48.2559 24.9605   3
   1  -5 -12 1028.11 57.7374   3
  -1   5  12 1128.16 61.3147   3
   1   5 -12 1081.13 35.3302   1
   1  -5 -11 806.867 48.9168   3
   1   5 -11 866.948 30.8162   1
  -1   5  11 892.251 52.4009   3
  -1   5  10 289.669 30.5689   3
   1  -5 -10 287.028 31.5005   3
   1   5 -10 275.113 17.7546   1
  -1   5   9 476.325 35.8985   3
   1   5  -9 487.210 22.6688   1
   1  -5  -9 460.033 36.5714   3
  -1   5   8 106.376 19.2980   3
   1   5  -8 125.462 12.3041   1
   1  -5  -8 112.785 23.4170   3
  -1   5   7 748.945 41.2014   3
   1   5  -7 742.584 26.7468   1
   1  -5  -7 765.901 44.1338   3
   1  -5  -6 74.0158 20.2746   3
  -1  -5   6 82.2985 11.7856   1
  -1   5   6 84.4805 18.4898   3
   1   5  -6 79.6220 12.0630   1
   1   5  -5 2637.09 49.2429   1
  -1   5   5 2543.96 68.6476   3
  -1  -5   5 2547.59 49.0334   1
   1  -5  -5 2542.20 68.8116   3
  -1  -5   4 18.1888 10.4177   1
   1  -5  -4 13.2015 16.3557   3
  -1   5   4 27.4974 13.4207   3
   1   5  -4 12.6456 14.0124   3
   1  -5  -3 364.807 27.8117   3
  -1  -5   3 344.571 22.7436   1
  -1   5   3 340.753 25.6587   3
   1   5  -3 376.451 27.4068   3
  -1  -5   3 375.047 27.6487   3
   1   5  -2 5.99994 13.0442   3
  -1   5   2 1.07835 12.0946   3
  -1  -5   2-5.51023 15.6569   3
   1  -5  -2-23.2023 17.1775   3
   1   5  -1 448.039 29.3054   3
   1  -5  -1 459.205 29.8604   3
  -1   5   1 417.165 27.5096   3
  -1  -5   1 440.146 28.7638   3
   1  -5   0 22.0859 14.2227   3
  -1  -5   0 28.4364 16.2181   3
   1   5   0 6.99818 12.7992   3
  -1   5   0 13.5710 12.5409   3
   1  -5   1 326.801 26.0050   3
   1   5   1 307.409 25.0912   3
  -1  -5  -1 320.340 26.9864   3
  -1   5  -1 303.830 24.4236   3
   1  -5   2 307.514 26.1524   3
  -1   5  -2 348.711 26.0350   3
   1   5   2 343.494 25.3611   3
  -1  -5  -2 375.563 28.2029   3
  -1   5  -3 182.876 21.5898   3
  -1  -5  -3 179.934 22.0524   3
   1   5   3 175.699 20.0462   3
  -1  -5  -4 1950.91 59.6481   3
   1  -5   4 1939.82 37.7021   1
   1   5   4 1937.85 58.3555   3
  -1  -5  -5 47.4675 18.7262   3
   1   5   5 60.0449 16.7461   3
   1  -5   5 28.5545 7.20554   1
  -1  -5  -6 1672.81 60.0782   3
   1  -5   6 1600.99 29.8043   1
   1   5   6 1583.84 58.1375   3
   1   5   6 1596.57 29.8129   2
   1   5   7 24.7473 15.0345   3
  -1  -5  -7 38.1577 20.9871   3
  -1   5  -7 38.3590 8.23754   1
  -1   5  -8 871.108 22.4916   1
  -1  -5  -8 864.231 49.2147   3
   1   5   8 818.721 46.5307   3
  -1  -5  -9 138.046 23.7157   3
  -1   5  -9 136.582 10.0537   1
   1   5   9 128.061 21.0131   3
  -1  -5 -10 10686.7 83.4482   2
   1   5  10 10722.7 177.062   3
  -1  -5 -10 10677.4 174.145   3
  -1   5 -10 10938.1 84.2204   1
   1   5  11 303.363 31.6010   3
  -1  -5 -11 309.483 15.7714   2
  -1   5 -11 321.856 15.9167   1
  -1  -5 -11 283.460 30.5758   3
  -1   5 -12 5496.60 66.4031   1
   1   5  12 5726.86 139.633   3
  -1  -5 -12 5420.14 133.709   3
  -1  -5 -12 5464.83 67.5086   2
  -1  -5 -13-2.32973 20.7676   3
   1   5  13-12.9771 19.6398   3
  -1  -5 -13 16.7958 7.28169   2
  -1   5 -13 18.4452 6.43169   1
  -1  -5 -14 1514.29 39.2898   2
  -1  -5 -14 1373.96 73.7902   3
   1   5  14 1557.72 77.3355   3
  -1  -5 -15-18.5135 23.5162   3
  -1  -5 -15 46.2132 9.72667   2
   1   5  15-8.46327 17.6980   3
  -1  -5 -16 104.114 27.4263   3
  -1  -5 -16 121.782 13.8763   2
   1   5  16 107.593 23.9099   3
   1   5  17 302.532 42.3126   3
  -1  -5 -17 290.830 40.7145   3
  -1  -5 -17 286.097 20.7657   2
  -1  -5 -18 1434.09 45.6857   2
  -1  -5 -18 1410.22 84.6945   3
  -1  -5 -19 1944.90 54.7992   2
  -1  -5 -19 2053.38 105.348   3
  -1   5 -20 4810.52 156.337   3
  -1  -5 -20 7004.85 197.000   3
  -1  -5 -20 6715.44 104.032   2
  -1  -5 -21 3965.46 156.237   3
  -1   5 -21 4111.37 156.837   3
  -1  -5 -21 4143.75 85.2121   2
  -1   5 -22 5551.43 188.835   3
  -1  -5 -22 5570.32 184.133   3
  -1  -5 -22 5174.92 96.1456   2
  -1  -5 -23 744.417 38.2436   2
  -1   5 -23 1037.65 91.9819   3
  -1  -5 -23 959.234 86.2628   3
  -1  -5 -24 328.763 52.9350   3
  -1   5 -24 411.849 60.7066   3
  -1  -5 -24 270.065 24.5421   2
  -1   5 -25 74.1497 35.4933   3
  -1  -5 -25 46.1349 13.9089   2
  -1  -5 -25 40.7891 28.8791   3
  -1  -5 -26 4.74515 24.8645   3
  -1   5 -26-12.8626 27.3023   3
  -1  -5 -27 3.79634 24.1088   3
  -1   5 -27-34.0186 37.4249   3
  -1   5 -28-4.76763 29.1234   3
  -1  -5 -28 71.4416 30.9901   3
  -1   5 -29 40.0897 27.4666   3
  -1  -5 -29 32.5446 29.1087   3
  -1   5 -30-2.14698 32.9360   3
  -1  -5 -30 19.1781 29.3207   3
  -1   5 -31 329.665 57.5338   3
  -1  -5 -31 348.135 59.9809   3
   1   7 -31-6.24625 30.5578   3
   1  -7 -31-41.4223 36.5539   3
   1  -7 -30 20.4323 30.1660   3
   1   7 -30-86.1534 37.5498   3
   1  -7 -29 32.6195 34.2088   3
   1   7 -29-19.8957 34.6285   3
   1   7 -28 77.6241 30.5403   3
   1  -7 -28 99.7953 37.5789   3
   1   7 -27 115.267 38.6171   3
   1  -7 -27 121.250 37.7040   3
   1   7 -26 275.527 52.1148   3
   1  -7 -26 288.625 50.6656   3
   1   7 -25 1073.61 89.6339   3
   1   7 -25 1075.18 44.9118   1
   1  -7 -25 1135.49 95.8429   3
   1   7 -24 10382.7 135.643   1
   1  -7 -24 10367.5 263.728   3
   1   7 -24 11361.6 278.547   3
   1   7 -23 6625.87 107.973   1
   1  -7 -23 6885.31 209.436   3
   1   7 -22 19661.1 183.396   1
   1  -7 -22 19531.3 342.308   3
   1   7 -21 3093.79 72.2930   1
   1  -7 -21 3217.03 139.548   3
   1   7 -20 6567.55 103.056   1
   1  -7 -20 6792.46 192.936   3
   1   7 -19 25.7411 9.64866   1
   1  -7 -19-10.0682 21.3534   3
   1  -7 -18 66.6352 24.3586   3
   1   7 -18 76.9188 12.2362   1
  -1   7  17 110.178 27.4622   3
   1  -7 -17 84.9921 24.8015   3
   1   7 -17 106.173 13.7045   1
   1  -7 -16 301.524 39.1775   3
  -1   7  16 320.651 41.7818   3
   1   7 -16 332.624 21.8213   1
  -1   7  15 16.5523 15.5234   3
   1   7 -15 13.4640 7.63181   1
   1  -7 -15 17.2455 20.1923   3
  -1   7  14 4717.36 138.506   3
   1  -7 -14 4360.95 133.276   3
   1   7 -14 4636.51 76.6603   1
  -1   7  13 1879.59 85.6062   3
   1  -7 -13 1788.71 83.4696   3
   1   7 -13 1759.06 46.4378   1
   1   7 -12 12189.2 120.444   1
  -1   7  12 12468.4 206.602   3
   1  -7 -12 12010.0 205.537   3
   1   7 -11 13151.3 125.005   1
  -1   7  11 13159.2 205.834   3
   1  -7 -11 12768.1 204.929   3
   1  -7 -10 9778.58 171.963   3
  -1   7  10 9894.16 176.218   3
   1   7 -10 9699.39 106.692   1
  -1   7   9 9771.57 168.197   3
   1  -7  -9 9508.09 166.109   3
   1   7  -9 10006.9 107.392   1
  -1   7   8 1311.42 60.8028   3
  -1  -7   8 1254.55 38.4065   1
   1  -7  -8 1367.58 63.5185   3
  -1   7   7 314.387 30.7694   3
   1  -7  -7 342.732 34.1577   3
  -1  -7   7 357.558 22.1908   1
   1  -7  -6 155.563 26.7055   3
  -1  -7   6 135.344 15.4621   1
  -1   7   6 162.273 23.4753   3
   1   7  -6 176.885 23.5579   3
  -1   7   5 444.217 33.7252   3
   1   7  -5 473.457 35.1492   3
  -1  -7   5 447.677 26.3175   1
   1  -7  -5 468.436 37.1068   3
  -1  -7   4 284.410 23.4449   1
   1  -7  -4 263.443 29.3153   3
   1   7  -4 234.119 26.7564   3
  -1   7   4 248.150 26.3738   3
   1  -7  -3 114.393 24.3677   3
  -1   7   3 89.8762 18.5059   3
   1   7  -3 99.0063 21.2571   3
  -1  -7   3 65.1748 20.5175   3
   1  -7  -2 1296.79 56.3558   3
  -1   7   2 1258.21 53.3078   3
   1   7  -2 1388.40 56.7520   3
  -1  -7   2 1256.29 54.4042   3
  -1   7   1 483.769 35.0699   3
  -1  -7   1 526.592 37.4824   3
   1   7  -1 471.114 34.4588   3
   1  -7  -1 544.903 38.0686   3
   1   7   0 334.966 30.8363   3
  -1   7   0 346.138 30.5872   3
   1  -7   0 362.843 32.5372   3
  -1  -7   0 311.465 30.5608   3
  -1  -7  -1 410.560 35.3849   3
  -1   7  -1 438.438 33.8065   3
   1   7   1 419.755 32.6554   3
   1  -7   1 458.578 35.1479   3
  -1   7  -2 54.4081 19.8398   3
   1  -7   2 51.5778 19.6105   3
   1   7   2 34.1405 14.6804   3
  -1  -7  -2 55.7519 20.8965   3
   1   7   3 14.9948 14.8406   3
  -1   7  -3-2.07102 15.3834   3
   1  -7   3-1.82560 18.1217   3
  -1  -7  -3-18.0621 20.5163   3
  -1   7  -4 101.286 21.5128   3
  -1  -7  -4 111.887 23.7582   3
   1   7   4 89.7265 17.7083   3
   1  -7   5 22.2048 10.8861   1
   1   7   5 25.0026 15.5803   3
  -1   7  -5 2.02901 14.5856   3
  -1  -7  -5-1.54297 19.3851   3
   1  -7   6 832.981 29.4018   1
  -1  -7  -6 863.979 49.8271   3
  -1   7  -6 894.515 48.4765   3
   1   7   6 913.153 49.0496   3
   1   7   7 199.790 25.7018   3
  -1  -7  -7 184.693 29.0270   3
   1  -7   7 189.450 14.4416   1
   1   7   8 6928.38 140.216   3
   1  -7   8 6793.41 73.0469   1
  -1  -7  -8 6987.54 139.985   3
  -1  -7  -9 9504.87 167.318   3
   1   7   9 9759.24 173.246   3
   1   7  10 14877.8 216.568   3
  -1  -7 -10 14448.4 214.285   3
   1   7  11 19861.8 260.672   3
  -1  -7 -11 18735.6 251.368   3
   1   7  12 4813.25 132.414   3
  -1  -7 -12 4813.67 132.323   3
  -1   7 -12 4869.71 60.9276   1
   1   7  13 6885.40 165.027   3
  -1  -7 -13 6622.41 159.267   3
  -1   7 -13 6753.28 72.8171   1
   1   7  14 112.969 24.5440   3
  -1  -7 -14 100.165 25.3876   3
  -1   7 -14 102.661 10.1149   1
  -1  -7 -15 816.584 62.8605   3
  -1   7 -15 945.925 28.4101   1
   1   7  15 950.825 65.6596   3
   1   7  16 69.2708 21.9923   3
  -1   7 -16 76.4250 8.91104   1
  -1  -7 -16 55.6640 23.2513   3
  -1  -7 -17 71.0193 25.9881   3
  -1   7 -17 37.3381 7.08245   1
   1   7  17 58.0393 23.1681   3
  -1  -7 -18 0.64193 20.2499   3
  -1   7 -18 41.3652 7.48440   1
  -1   7 -19 2580.34 51.9090   1
  -1  -7 -19 2372.78 113.833   3
  -1   7 -20 1126.48 35.3575   1
  -1  -7 -20 1129.29 82.6443   3
  -1  -7 -21 4379.87 162.659   3
  -1   7 -21 4172.53 68.0555   1
  -1  -7 -22 1367.00 95.7763   3
  -1   7 -22 1371.64 39.7722   1
  -1  -7 -23 687.026 71.9643   3
  -1   7 -23 533.637 25.0544   1
  -1  -7 -24 443.128 61.6935   3
  -1   7 -24 470.216 63.7960   3
  -1   7 -24 462.475 22.7017   1
  -1   7 -25 652.791 73.5811   3
  -1  -7 -25 551.858 66.9810   3
  -1  -7 -26 675.404 74.0715   3
  -1   7 -26 690.792 74.2941   3
  -1   7 -27 694.876 77.8022   3
  -1  -7 -27 686.320 75.6964   3
  -1  -7 -28 134.998 41.6109   3
  -1   7 -28 152.434 42.7520   3
  -1  -7 -29-4.31028 29.1288   3
  -1   7 -29 24.7903 28.7196   3
  -1  -7 -30 4.51631 29.1163   3
  -1   7 -30 13.9730 28.4452   3
   1   9 -30 48.8229 29.2584   3
   1  -9 -30 64.0182 34.2199   3
   1  -9 -29 424.089 65.0254   3
   1   9 -29 354.986 58.2115   3
   1  -9 -28 43.2536 32.6603   3
   1   9 -28 35.9519 33.9557   3
   1   9 -27 2422.10 141.848   3
   1  -9 -27 2327.05 139.112   3
   1  -9 -26 84.9595 34.4202   3
   1  -9 -25 201.522 45.1202   3
   1  -9 -24 107.130 33.8035   3
   1   9 -24 132.972 13.1577   1
   1   9 -23 1977.46 49.6451   1
   1  -9 -23 1897.11 114.778   3
   1   9 -22 725.354 30.3525   1
   1  -9 -22 685.774 69.4189   3
   1  -9 -21 1698.79 104.145   3
   1   9 -21 1626.20 46.6307   1
   1  -9 -20 252.815 42.9608   3
   1   9 -20 266.009 18.7928   1
   1  -9 -19 34.6468 20.0556   3
   1   9 -19 63.4172 10.1868   1
   1   9 -18 330.389 22.5235   1
   1  -9 -18 297.717 42.9227   3
   1  -9 -17 310.037 46.9332   3
   1   9 -17 342.286 23.1434   1
   1  -9 -16 78.1034 26.7690   3
   1   9 -16 133.372 15.9885   1
  -1   9  16 142.647 32.1708   3
   1   9 -15 157.964 16.6412   1
   1  -9 -15 144.549 31.0911   3
  -1   9  15 123.842 28.2545   3
   1  -9 -14 2919.32 112.219   3
  -1   9  14 3008.30 115.081   3
   1   9 -14 2738.32 60.5757   1
   1  -9 -13 61.4964 30.1567   3
  -1   9  13 31.1973 19.7954   3
   1  -9 -12 23171.9 298.050   3
  -1   9  12 24346.1 308.035   3
  -1   9  11 945.313 61.5917   3
   1  -9 -11 878.760 61.1655   3
  -1   9  10 20098.6 266.918   3
   1  -9 -10 20623.1 266.850   3
   1   9  -9 2830.72 99.3550   3
  -1  -9   9 2563.58 61.7052   1
   1  -9  -9 2670.72 95.9361   3
  -1   9   9 2680.55 94.4659   3
  -1   9   8 3739.02 108.450   3
   1  -9  -8 3956.51 112.613   3
  -1  -9   8 3659.76 75.5217   1
   1   9  -8 3897.34 113.985   3
   1   9  -7 653.340 46.6409   3
  -1  -9   7 610.976 32.6346   1
  -1   9   7 646.986 44.7812   3
   1  -9  -7 597.709 46.3609   3
   1   9  -6 56.8093 19.3039   3
  -1   9   6 21.3424 14.9552   3
  -1  -9   6 34.0484 12.0354   1
   1  -9  -6 21.8533 19.1499   3
  -1   9   5-18.6777 17.9228   3
  -1  -9   5 14.3813 13.8384   1
   1  -9  -5-1.15239 19.0389   3
   1   9  -5-1.23762 16.9125   3
  -1   9   4-9.32034 17.5950   3
   1  -9  -4-40.5100 26.2919   3
  -1  -9   4-38.1265 23.8934   3
   1   9  -4-5.87418 15.2890   3
   1  -9  -3 1766.37 72.4914   3
   1   9  -3 1724.44 69.8828   3
  -1   9   3 1661.39 67.2962   3
  -1  -9   3 1754.48 70.0587   3
   1   9  -2 1322.19 62.6061   3
   1  -9  -2 1284.17 64.3481   3
  -1  -9   2 1305.24 62.5655   3
  -1   9   2 1207.67 59.8228   3
  -1   9   1 6098.59 129.600   3
  -1  -9   1 6411.36 131.898   3
   1  -9  -1 6521.77 135.744   3
   1   9  -1 6232.84 131.144   3
   1  -9   0 3074.26 94.5439   3
  -1  -9   0 3102.33 92.7759   3
  -1   9   0 3002.87 92.2638   3
   1   9   0 2940.10 90.3000   3
   1   9   1 9974.50 164.568   3
   1  -9   1 10505.8 170.833   3
  -1   9  -1 10447.3 169.970   3
  -1  -9  -1 10573.2 170.859   3
  -1  -9  -2 286.721 32.2814   3
   1  -9   2 291.867 32.6862   3
   1   9   2 287.783 31.2108   3
  -1   9  -2 271.450 31.1266   3
  -1  -9  -3 1842.79 74.2146   3
  -1   9  -3 1886.97 75.3388   3
   1  -9   3 1703.03 69.5790   3
   1   9   3 1725.56 70.0814   3
   1   9   4 118.544 20.5980   3
   1  -9   4 88.8659 22.6514   3
  -1  -9  -4 90.2826 22.4396   3
  -1   9  -4 129.051 26.2266   3
   1   9   5 77.0604 18.2858   3
  -1   9  -5 96.6029 22.6388   3
  -1  -9  -5 80.8300 22.4272   3
  -1  -9  -6 618.792 46.3338   3
   1   9   6 596.414 42.9364   3
   1  -9   6 591.519 30.3839   1
  -1   9  -6 603.485 44.5278   3
   1   9   7 3445.74 104.363   3
   1  -9   7 3268.25 67.3059   1
  -1  -9  -7 3614.65 107.427   3
  -1   9  -7 3673.86 110.158   3
   1   9   8 1539.27 71.5885   3
  -1   9  -8 1650.08 75.0793   3
  -1  -9  -8 1537.15 72.9672   3
   1  -9   8 1457.78 43.1955   1
  -1  -9  -9 19813.8 259.454   3
   1   9   9 18539.1 124.217   2
   1  -9   9 19068.5 146.328   1
   1   9   9 19812.1 259.651   3
   1   9  10 1800.41 36.4029   2
   1   9  10 1923.38 86.3871   3
  -1  -9 -10 1947.33 87.1476   3
  -1  -9 -11 27959.7 327.065   3
   1   9  11 29005.2 333.808   3
  -1  -9 -12 259.133 38.1510   3
   1   9  12 224.836 36.7933   3
   1   9  13 7161.89 173.364   3
  -1  -9 -13 6845.77 168.596   3
   1   9  14 98.0626 25.8914   3
  -1  -9 -14 68.4770 23.8177   3
  -1  -9 -15 131.057 29.5706   3
   1   9  15 163.284 32.7229   3
  -1  -9 -16 258.985 40.0137   3
   1   9  16 335.413 42.7363   3
  -1  -9 -17 121.146 31.8133   3
  -1  -9 -18 206.498 36.0125   3
  -1  -9 -19 12.3914 25.6611   3
  -1  -9 -20 31.2436 24.9600   3
  -1  -9 -21 611.331 62.1390   3
  -1  -9 -22 28.1643 23.0742   3
  -1  -9 -23 135.506 37.7902   3
  -1  -9 -24 800.677 78.3464   3
  -1  -9 -25 121.841 44.9300   3
  -1  -9 -26 3668.72 171.752   3
  -1   9 -26 3970.17 179.206   3
  -1  -9 -27 32.2375 33.8560   3
  -1   9 -27 35.1941 33.0990   3
  -1   9 -28 1258.18 105.884   3
  -1  -9 -28 1175.61 105.390   3
  -1  -9 -29 7.33634 27.7360   3
  -1   9 -29-8.80541 34.5278   3
  -1   9 -30 201.885 46.8339   3
  -1  -9 -30 267.710 54.6921   3
   1 -11 -30 185.785 46.5674   3
   1  11 -30 195.293 48.6479   3
   1  11 -29 243.257 53.8848   3
   1 -11 -29 147.366 42.0802   3
   1 -11 -28 97.1893 39.3261   3
   1 -11 -27 140.114 40.9616   3
   1 -11 -26 70.5040 34.2604   3
   1 -11 -25 204.600 43.1757   3
   1 -11 -24-42.1227 32.6090   3
   1 -11 -23-53.7555 33.5349   3
   1 -11 -22-68.2026 42.1733   3
   1 -11 -21-87.9799 42.0587   3
   1 -11 -20-24.2452 32.2197   3
   1 -11 -19 10.6122 25.7086   3
   1 -11 -18 599.303 59.6027   3
   1 -11 -17 1373.60 87.9859   3
   1 -11 -16 1081.48 76.5515   3
   1 -11 -15 646.299 57.4623   3
  -1  11  15 838.472 67.7649   3
   1 -11 -14 35.0254 19.5913   3
  -1  11  14 114.164 26.3909   3
  -1  11  13 157.211 28.0083   3
   1 -11 -13 134.617 27.9702   3
   1 -11 -12 1816.98 91.1130   3
  -1  11  12 1879.11 91.3382   3
   1  11 -12 2010.54 95.2751   3
  -1  11  11 277.291 13.8106   2
  -1  11  11 312.037 38.9902   3
   1 -11 -11 315.048 41.6006   3
   1  11 -11 368.553 43.0956   3
  -1 -11  11 271.767 22.6725   1
  -1 -11  10 3352.39 77.7468   1
  -1  11  10 3548.41 118.938   3
   1  11 -10 3704.08 124.541   3
   1 -11 -10 3469.33 118.648   3
  -1  11   9 32.4011 17.9199   3
   1  11  -9 19.7273 17.2452   3
   1 -11  -9 21.5907 17.0846   3
  -1 -11   9 8.37471 10.6741   1
  -1  11   8 747.070 51.5224   3
   1  11  -8 789.372 56.4831   3
   1 -11  -8 779.410 56.2378   3
  -1 -11   8 714.163 39.2399   1
  -1  11   7 128.516 22.7576   3
   1 -11  -7 93.2645 22.7018   3
   1  11  -7 115.984 26.3047   3
  -1 -11   7 109.898 17.9298   1
  -1  11   6 5.26649 21.3239   3
   1 -11  -6-11.4877 21.2154   3
   1  11  -6 3.43355 16.7532   3
  -1 -11   6 10.0893 14.0729   1
  -1  11   5 98.9913 22.6307   3
   1  11  -5 122.582 25.6845   3
  -1 -11   5 87.9420 21.7678   3
  -1 -11   5 140.004 23.1139   1
   1 -11  -5 91.0547 22.0607   3
   1 -11  -4 122.428 26.9534   3
  -1  11   4 178.215 28.8699   3
   1  11  -4 130.145 21.9134   3
  -1 -11   4 113.313 22.9868   3
  -1 -11   3 7142.74 153.115   3
   1 -11  -3 7416.98 161.518   3
   1  11  -3 7400.20 159.466   3
  -1  11   3 7141.86 152.213   3
  -1 -11   2 631.368 52.1592   3
   1 -11  -2 665.232 54.7604   3
   1  11  -2 654.719 49.2434   3
  -1  11   2 645.731 50.1426   3
  -1 -11   1 24239.7 283.872   3
  -1  11   1 24099.9 280.541   3
   1  11  -1 24436.7 284.548   3
   1 -11  -1 24473.6 288.230   3
  -1 -11   0 2389.78 93.1127   3
   1  11   0 2267.36 88.9830   3
  -1  11   0 2356.35 89.7316   3
   1 -11   0 2406.62 92.3480   3
   1 -11   1 33133.3 331.876   3
  -1  11  -1 33189.4 334.879   3
   1  11   1 32364.4 330.511   3
  -1 -11  -1 33297.1 333.910   3
   1  11   2 1636.80 77.6695   3
  -1  11  -2 1714.75 77.9033   3
   1 -11   2 1633.08 75.8864   3
  -1 -11  -2 1781.17 81.3485   3
  -1 -11  -3 5721.36 143.487   3
   1 -11   3 5395.09 133.073   3
   1  11   3 5532.26 133.123   3
  -1  11  -3 5832.55 142.522   3
  -1  11  -4-18.2334 28.3050   3
   1  11   4-10.9162 18.7190   3
   1 -11   4-57.6377 25.4404   3
  -1 -11  -4-40.7367 27.8524   3
  -1  11  -5 288.161 36.0327   3
   1  11   5 233.725 31.1813   3
  -1 -11  -5 249.139 34.3151   3
   1 -11   6 126.931 19.2987   1
   1  11   6 97.4816 19.1030   3
  -1 -11  -6 106.898 26.5721   3
  -1  11  -6 139.337 26.0461   3
   1  11   7 270.234 30.1489   3
   1 -11   7 281.762 25.1457   1
  -1 -11  -7 275.271 36.0701   3
  -1  11  -7 299.161 36.2896   3
  -1 -11  -8 4.17148 20.4803   3
   1  11   8-23.1080 20.1861   3
  -1  11  -8 23.1620 18.0819   3
   1 -11   8-1.75815 10.0275   1
   1 -11   9 3609.01 75.9145   1
  -1  11  -9 3950.78 126.269   3
  -1 -11  -9 3846.88 123.873   3
   1  11   9 3827.67 121.778   3
   1  11  10 86.1786 11.6736   2
  -1  11 -10 122.341 30.6702   3
   1  11  10 97.9834 25.8540   3
   1 -11  10 88.8065 14.1188   1
  -1 -11 -10 86.4543 28.0290   3
  -1  11 -11 4189.61 135.127   3
   1 -11  11 3700.63 70.1169   1
  -1 -11 -11 3946.35 131.037   3
   1  11  11 4084.42 132.456   3
   1  11  11 3694.34 57.3077   2
  -1 -11 -12 127.365 28.5514   3
   1  11  12 148.721 30.0732   3
   1  11  13-38.4281 25.3451   3
  -1 -11 -13-42.4014 29.2445   3
  -1 -11 -14 391.185 43.9529   3
   1  11  14 582.537 56.1729   3
  -1 -11 -15 894.855 68.6793   3
  -1 -11 -16 2505.29 116.749   3
  -1 -11 -17-21.1513 25.1044   3
  -1 -11 -18 633.294 61.5538   3
  -1 -11 -19 33.1442 22.2626   3
  -1 -11 -20-109.536 45.0089   3
  -1 -11 -21-97.9436 42.6755   3
  -1 -11 -22-8.54776 34.6022   3
  -1 -11 -23 21.7988 28.6610   3
  -1 -11 -24 75.7572 28.9260   3
  -1 -11 -25 86.3454 32.8627   3
  -1 -11 -26 1270.49 107.563   3
  -1 -11 -27 365.650 60.2577   3
  -1  11 -28 675.694 79.0104   3
  -1 -11 -28 637.553 79.9288   3
  -1 -11 -29-54.6896 37.5434   3
  -1  11 -29-54.7010 37.8772   3
   1 -13 -29 551.079 78.4742   3
   1 -13 -28 198.877 51.0549   3
   1 -13 -27 53.6696 28.8684   3
   1 -13 -26 32.5106 27.6068   3
   1 -13 -25-61.0443 43.2667   3
   1 -13 -24 175.368 40.8714   3
   1 -13 -23 690.925 75.1661   3
   1 -13 -22 565.386 67.8069   3
   1 -13 -21 2797.80 143.324   3
   1 -13 -20 205.673 43.6235   3
   1 -13 -19 279.079 47.3182   3
   1 -13 -18 65.3945 24.8833   3
   1 -13 -17 1967.07 108.693   3
   1 -13 -16-16.4019 30.8838   3
   1 -13 -15 3448.10 138.862   3
   1 -13 -14 129.788 31.0885   3
   1 -13 -13 447.416 50.9188   3
   1  13 -13 529.171 55.4744   3
  -1  13  13 536.884 55.4376   3
  -1  13  12 128.792 30.3573   3
  -1  13  12 88.1716 9.29622   2
   1 -13 -12 130.290 32.5967   3
   1  13 -12 126.820 30.2645   3
  -1 -13  12 81.3299 15.5949   1
  -1 -13  11 189.557 21.9522   1
  -1  13  11 202.630 35.6165   3
   1 -13 -11 234.109 40.2579   3
   1  13 -11 193.896 34.4326   3
   1  13 -10 49.7748 22.7691   3
  -1 -13  10 23.4799 11.1896   1
  -1  13  10 34.4423 22.1608   3
   1 -13 -10 60.7281 24.1763   3
  -1 -13   9 241.249 26.1698   1
   1  13  -9 315.219 41.2956   3
   1 -13  -9 295.623 38.8259   3
  -1  13   9 231.876 31.6046   3
  -1 -13   8 184.472 23.6572   1
  -1  13   8 184.749 30.3219   3
   1  13  -8 238.356 34.8580   3
   1 -13  -8 209.907 34.0528   3
  -1  13   7 63.1986 17.9161   3
  -1 -13   7 80.9230 17.7665   1
   1  13  -7 58.7550 21.2946   3
   1 -13  -7 51.0167 21.8313   3
  -1 -13   6 1430.75 62.5810   1
   1  13  -6 1630.50 84.6717   3
  -1  13   6 1515.99 79.0679   3
   1 -13  -6 1512.27 81.7563   3
   1  13  -5 674.199 56.3563   3
  -1 -13   5 636.643 45.9707   1
  -1 -13   5 577.878 50.4235   3
  -1  13   5 596.991 49.6184   3
   1 -13  -5 667.659 55.3678   3
   1  13  -4 549.487 47.7308   3
   1 -13  -4 522.688 47.8355   3
  -1 -13   4 499.934 46.2672   3
  -1  13   4 564.678 48.2662   3
  -1 -13   3 1706.52 82.7582   3
   1 -13  -3 1892.50 89.9962   3
  -1  13   3 1715.58 82.5690   3
   1  13  -3 1831.29 88.3234   3
   1 -13  -2 1978.87 93.6601   3
  -1 -13   2 2018.00 92.0511   3
   1  13  -2 2019.74 91.4339   3
  -1  13   2 1978.08 90.6110   3
   1  13  -1 7614.50 175.155   3
   1 -13  -1 7689.12 175.176   3
  -1 -13   1 7378.05 172.534   3
  -1  13   1 7657.54 175.096   3
   1 -13   0 12544.7 222.588   3
  -1  13   0 12812.7 224.053   3
   1  13   0 12506.7 222.790   3
  -1 -13   0 12446.1 225.201   3
   1  13   1 6575.28 161.258   3
  -1 -13  -1 6740.36 165.696   3
   1 -13   1 6410.29 164.315   3
  -1  13  -1 6636.27 164.891   3
  -1 -13  -2 3698.79 122.981   3
  -1  13  -2 3738.05 124.617   3
   1  13   2 3421.68 118.929   3
   1 -13   2 3391.07 116.470   3
   1  13   3 16.8736 18.1359   3
   1 -13   3 18.7222 19.9654   3
  -1  13  -3 9.30297 17.3397   3
  -1 -13  -3 26.6077 21.9247   3
   1 -13   4 200.274 32.6807   3
   1  13   4 181.318 28.5935   3
  -1  13  -4 209.351 31.3251   3
  -1 -13  -4 220.884 35.5516   3
   1 -13   5 666.127 54.0507   3
  -1 -13  -5 757.575 59.9788   3
  -1  13  -5 706.182 56.2348   3
   1  13   5 668.738 52.0289   3
   1  13   6 721.779 56.6718   3
  -1 -13  -6 786.169 60.9488   3
  -1  13  -6 842.043 63.0757   3
   1 -13   6 741.516 44.7224   1
   1  13   7 379.189 40.5210   3
  -1  13  -7 480.658 48.5019   3
   1 -13   7 421.807 33.5061   1
  -1 -13  -7 441.010 46.3027   3
   1 -13   8 178.030 22.1336   1
  -1 -13  -8 208.078 34.2478   3
  -1  13  -8 198.606 33.3120   3
   1  13   8 176.845 29.7245   3
   1  13   9 773.283 59.0882   3
  -1  13  -9 845.717 65.6412   3
   1 -13   9 769.139 41.2182   1
  -1 -13  -9 732.164 59.8756   3
  -1  13 -10 21.8279 17.1780   3
  -1 -13 -10-14.6661 19.5654   3
   1  13  10 20.8070 21.9222   3
   1 -13  10 20.2632 10.0669   1
   1  13  11 1166.55 76.3565   3
  -1  13 -11 1275.46 80.3977   3
  -1 -13 -11 1165.27 77.0691   3
   1 -13  11 1048.19 43.4110   1
   1  13  11 1108.38 37.9028   2
   1  13  12 466.185 51.1616   3
   1  13  12 411.477 21.1151   2
   1 -13  12 414.859 26.2317   1
  -1 -13 -12 452.429 54.0559   3
  -1  13 -12 492.948 53.6431   3
  -1 -13 -13 184.303 37.4290   3
  -1 -13 -14 4056.12 148.079   3
  -1 -13 -15-9.06642 26.2296   3
  -1 -13 -16 3116.19 136.221   3
  -1 -13 -17-14.2976 26.0487   3
  -1 -13 -18 140.763 33.7764   3
  -1 -13 -19 206.326 43.8585   3
  -1 -13 -20 3186.05 149.983   3
  -1 -13 -21 728.640 77.1829   3
  -1 -13 -22 1455.50 104.807   3
  -1 -13 -23 12.8151 33.2308   3
  -1 -13 -24-48.5243 40.2807   3
  -1 -13 -25-9.97087 25.5013   3
  -1 -13 -26 13.7724 31.3919   3
  -1 -13 -27 390.174 64.1299   3
  -1 -13 -28 78.9954 34.8921   3
   1 -15 -28 10.6630 27.7963   3
   1 -15 -27-11.8930 28.3427   3
   1 -15 -26 380.285 61.2697   3
   1 -15 -25 28.5889 31.0180   3
   1 -15 -24 4372.56 191.852   3
   1 -15 -23 418.178 66.7084   3
   1 -15 -22 10319.1 283.253   3
   1 -15 -21 2632.49 146.207   3
   1 -15 -20 7698.91 235.596   3
   1 -15 -19 2253.33 128.427   3
   1 -15 -18 1093.23 90.6145   3
   1 -15 -17-20.9811 30.0278   3
   1 -15 -16 33.5435 22.8908   3
   1 -15 -15 559.338 61.1001   3
   1 -15 -14 38.2352 28.1859   3
  -1 -15  13 1026.68 49.4911   1
   1 -15 -13 1150.37 84.0169   3
  -1  15  13 981.630 30.7618   2
   1 -15 -12 30.2183 23.4570   3
  -1 -15  12 18.9949 11.7846   1
   1 -15 -11 3632.47 141.718   3
  -1 -15  11 3212.58 92.2411   1
  -1 -15  10 35.3964 15.7556   1
  -1  15  10 15.7181 19.0077   3
   1 -15 -10 31.3867 21.7541   3
   1  15 -10 26.1503 18.8769   3
   1  15  -9 1124.68 78.3663   3
  -1  15   9 1011.16 70.1368   3
  -1 -15   9 991.730 54.5033   1
   1 -15  -9 1038.05 75.0479   3
   1  15  -8-14.4347 25.7148   3
   1 -15  -8-1.39783 21.3615   3
  -1 -15   8 20.7710 13.5190   1
  -1  15   8-8.31662 26.2032   3
   1 -15  -7 2088.16 104.904   3
  -1  15   7 2085.44 98.9268   3
  -1 -15   7 1910.64 77.6796   1
   1  15  -7 2249.78 108.015   3
  -1 -15   6 257.321 32.7184   1
   1 -15  -6 243.241 39.9020   3
   1  15  -6 313.274 42.3563   3
  -1  15   6 235.260 34.2398   3
   1  15  -5 5289.82 162.597   3
   1 -15  -5 5065.91 157.738   3
  -1  15   5 4860.21 149.187   3
  -1 -15   5 4567.94 146.970   3
   1 -15  -4 546.875 55.3230   3
   1  15  -4 519.621 51.6421   3
  -1  15   4 453.198 47.1020   3
  -1 -15   4 468.575 50.1990   3
   1  15  -3 1113.09 76.3024   3
   1 -15  -3 1059.32 73.0349   3
  -1 -15   3 1007.09 69.1261   3
  -1  15   3 1041.30 70.6745   3
   1  15  -2 140.276 29.3159   3
  -1 -15   2 106.421 26.5504   3
   1 -15  -2 91.2015 25.6176   3
  -1  15   2 138.452 29.5874   3
  -1  15   1 43.7936 19.6929   3
  -1 -15   1 20.4666 20.5141   3
   1  15  -1 39.5400 21.2456   3
   1 -15  -1 18.1706 21.2576   3
  -1 -15   0 1834.94 93.4461   3
   1  15   0 1962.70 96.2692   3
   1 -15   0 1906.58 94.6135   3
  -1  15   0 1945.60 95.7907   3
  -1 -15  -1 27.9771 21.5304   3
  -1  15  -1 37.0992 18.3946   3
   1  15   1 45.5570 21.4468   3
   1 -15   1 2.91060 20.8586   3
   1 -15   2-12.1804 21.8271   3
  -1 -15  -2-34.6387 24.2778   3
  -1  15  -2 6.42482 17.9176   3
   1  15   2 0.55342 18.1648   3
  -1  15  -3 187.371 35.3567   3
  -1 -15  -3 159.864 34.2379   3
   1 -15   3 179.903 34.1985   3
   1  15   3 189.910 32.7396   3
  -1 -15  -4 4028.86 140.307   3
   1 -15   4 3707.35 131.757   3
   1  15   4 3824.00 132.631   3
  -1  15  -4 4276.28 145.358   3
  -1 -15  -5 68.9507 28.5576   3
   1  15   5 47.9510 19.6781   3
  -1  15  -5 63.4699 27.5923   3
   1 -15   5 74.6930 28.4756   3
   1  15   6 2394.83 105.180   3
  -1 -15  -6 2443.15 112.864   3
   1 -15   6 2174.12 82.1257   1
  -1  15  -6 2622.36 117.162   3
   1 -15   7 55.7994 17.5208   1
   1  15   7 54.1521 23.4044   3
  -1  15  -7 32.3371 18.1124   3
  -1 -15  -7 66.2167 28.3248   3
  -1  15  -8 23.5373 24.4666   3
   1 -15   8 13.6232 11.9145   1
   1  15   8 19.7102 17.2588   3
  -1 -15  -8 39.2638 22.3681   3
   1 -15   9 134.403 22.0832   1
   1  15   9 117.703 28.4056   3
  -1 -15  -9 45.3864 26.8509   3
  -1  15  -9 127.825 26.3493   3
  -1  15 -10 156.817 35.5504   3
   1  15  10 123.099 30.4703   3
   1 -15  10 137.662 22.7462   1
  -1 -15 -10 139.253 33.4636   3
  -1 -15 -11 1462.39 92.0983   3
   1 -15  11 1297.30 54.7197   1
   1  15  12 23.0305 10.7166   2
  -1 -15 -12 31.3429 24.0972   3
   1 -15  12 25.0205 12.9596   1
   1 -15  13 996.022 44.0677   1
   1  15  13 958.791 33.3265   2
  -1 -15 -13 979.625 76.3492   3
  -1 -15 -14 389.634 51.1880   3
  -1 -15 -15 467.439 56.5252   3
  -1 -15 -16 85.3840 29.5907   3
  -1 -15 -17 214.444 44.5794   3
  -1 -15 -18 1762.37 111.981   3
  -1 -15 -19 7044.74 224.603   3
  -1 -15 -20 5473.23 200.518   3
  -1 -15 -21 9079.42 265.978   3
  -1 -15 -22 2017.04 130.649   3
  -1 -15 -23 2017.87 132.720   3
  -1 -15 -24 167.617 43.8918   3
  -1 -15 -25 10.1196 26.4521   3
  -1 -15 -26-36.9309 35.9959   3
  -1 -15 -27 14.5530 32.1028   3
   1 -17 -26 199.523 50.4122   3
   1 -17 -25 492.551 75.9046   3
   1 -17 -24 2616.43 155.268   3
   1 -17 -23 1233.72 110.382   3
   1 -17 -22 8808.69 274.097   3
   1 -17 -21 493.607 76.7577   3
   1 -17 -20 7947.28 250.034   3
   1 -17 -19 131.845 41.5591   3
   1 -17 -18 1103.14 92.5008   3
   1 -17 -17-23.6236 31.8585   3
   1 -17 -16 38.3703 23.4368   3
   1 -17 -15 70.3701 30.6769   3
  -1  17  14 651.973 26.3357   2
  -1 -17  14 606.160 41.0233   1
   1 -17 -14 750.700 73.2924   3
  -1 -17  13 1078.41 56.0467   1
   1 -17 -13 1165.04 89.9699   3
   1 -17 -12 3222.22 144.800   3
  -1 -17  12 2785.74 91.9308   1
  -1 -17  11 5117.52 127.043   1
   1 -17 -11 5631.34 189.664   3
   1 -17 -10 3992.09 158.364   3
  -1 -17  10 3336.93 105.125   1
  -1 -17   9 3432.28 109.709   1
   1 -17  -9 3910.45 153.532   3
  -1 -17   8 22.5254 15.5382   1
   1 -17  -8 65.7971 29.4877   3
  -1 -17   7 40.2340 20.7237   1
   1 -17  -7 34.3075 28.3129   3
   1  17  -6 1043.83 78.6862   3
   1 -17  -6 1047.43 81.7465   3
  -1 -17   6 939.667 72.4585   3
  -1  17   6 943.114 72.6107   3
  -1 -17   6 895.109 59.0262   1
   1 -17  -5 1963.01 106.747   3
  -1 -17   5 1750.40 97.1519   3
  -1 -17   5 1820.99 85.5331   1
   1  17  -5 2098.55 110.088   3
  -1  17   5 1895.56 100.310   3
   1  17  -4 171.151 33.1156   3
  -1 -17   4 184.953 36.1197   3
   1 -17  -4 236.189 42.6081   3
  -1  17   4 211.083 35.5669   3
  -1  17   3 153.318 30.7498   3
   1  17  -3 148.014 28.6643   3
   1 -17  -3 142.125 31.0596   3
  -1 -17   3 170.374 35.8748   3
  -1  17   2 27.5193 18.0527   3
   1 -17  -2 43.8518 25.7869   3
  -1 -17   2 31.9445 25.5533   3
   1  17  -2 18.3879 16.5668   3
   1 -17  -1-11.6648 24.5567   3
  -1  17   1 9.96474 18.8113   3
  -1 -17   1 41.2503 24.4630   3
   1  17  -1 4.13724 21.6240   3
  -1 -17   0-16.6706 22.0710   3
  -1  17   0 7.32926 17.0552   3
   1 -17   0 20.3809 21.4482   3
   1  17   0 9.76993 21.0248   3
  -1  17  -1 61.8067 26.0726   3
   1 -17   1 52.6172 24.8307   3
   1  17   1 14.0188 17.4838   3
  -1 -17  -1 10.0607 27.9876   3
  -1 -17  -2 15.0732 22.0261   3
   1  17   2 18.5140 19.2482   3
   1 -17   2 16.3220 24.0870   3
  -1  17  -2 9.73057 19.7949   3
   1  17   3-1.11344 16.1558   3
  -1 -17  -3-41.0695 26.4346   3
  -1  17  -3 10.6784 24.1302   3
   1 -17   3-0.55660 20.8313   3
   1 -17   4 121.461 32.1630   3
   1  17   4 52.6322 27.0454   3
  -1 -17  -4 79.0512 33.3659   3
  -1  17  -4 69.4810 26.5664   3
  -1 -17  -5 14.9631 24.0266   3
   1  17   5 26.9696 19.9492   3
   1 -17   5 17.4074 25.0589   3
  -1  17  -5 48.8386 23.9837   3
   1 -17   6 1227.33 68.0946   1
  -1 -17  -6 1264.33 86.6394   3
   1 -17   7 557.218 45.2044   1
  -1 -17  -7 628.769 66.4476   3
  -1 -17  -8 6178.24 190.825   3
   1 -17   8 5461.97 134.923   1
   1 -17   9 2395.46 88.3543   1
  -1 -17  -9 2902.23 134.144   3
   1 -17  10 1560.94 68.5839   1
  -1 -17 -10 1808.41 107.635   3
  -1 -17 -11 3804.77 157.459   3
   1 -17  11 3407.85 98.7863   1
  -1 -17 -12 85.7320 34.7493   3
   1 -17  12 57.6344 16.5796   1
   1 -17  13 1790.85 66.7734   1
  -1 -17 -13 1965.56 116.471   3
   1  17  13 1821.77 53.8049   2
   1 -17  14 15.9922 10.7516   1
  -1 -17 -14 32.5694 31.4772   3
   1  17  14 12.2884 8.16118   2
  -1 -17 -15 492.930 63.2758   3
  -1 -17 -16-43.6213 31.8903   3
  -1 -17 -17 488.812 62.2015   3
  -1 -17 -18 104.764 37.7299   3
  -1 -17 -19 7525.74 241.199   3
  -1 -17 -20 241.859 61.5733   3
  -1 -17 -21 10301.9 292.088   3
  -1 -17 -22 229.591 65.0173   3
  -1 -17 -23 2687.59 160.096   3
  -1 -17 -24 213.493 59.9292   3
  -1 -17 -25 52.1793 39.2502   3
  -1 -17 -26 117.612 43.0002   3
   1 -19 -25 124.156 50.8474   3
   1 -19 -24 138.045 54.5949   3
   1 -19 -23 338.853 66.0932   3
   1 -19 -22 646.425 81.2720   3
   1 -19 -21 430.331 65.4703   3
   1 -19 -20 479.090 67.7954   3
   1 -19 -19-27.4227 34.7686   3
   1 -19 -18-27.0478 34.0264   3
   1 -19 -17-78.4939 40.4679   3
   1 -19 -16 49.9487 28.5255   3
  -1  19  15 12.5746 7.58166   2
  -1 -19  15 12.6050 14.0536   1
   1 -19 -15-17.3054 29.5137   3
   1 -19 -14 1661.67 113.630   3
  -1 -19  14 1469.85 69.0626   1
  -1 -19  13 48.6798 18.5480   1
   1 -19 -13 83.9435 34.8629   3
   1 -19 -12 9163.67 255.572   3
  -1 -19  12 8305.64 170.401   1
   1 -19 -11 848.473 83.7943   3
  -1 -19  11 663.988 52.5854   1
  -1 -19  10 12946.8 222.639   1
   1 -19 -10 14841.9 319.022   3
   1 -19  -9 2014.39 120.234   3
  -1 -19   9 1581.05 80.6941   1
  -1 -19   8 3110.25 113.092   1
   1 -19  -8 3599.63 154.566   3
  -1 -19   7 808.274 60.9313   1
   1 -19  -7 879.961 78.8220   3
   1 -19  -6 33.9973 23.0957   3
  -1 -19   6 25.8257 22.7866   3
  -1 -19   6 105.924 27.6781   1
  -1 -19   5 162.010 33.2444   3
   1 -19  -5 102.172 28.8928   3
  -1 -19   5 199.895 36.6236   1
   1 -19  -4 279.993 44.3411   3
  -1 -19   4 297.220 44.5338   3
   1 -19  -3 41.5968 23.2836   3
  -1 -19   3 38.6416 22.7549   3
   1 -19  -2 1951.21 110.552   3
  -1 -19   2 1918.82 107.105   3
   1 -19  -1 1122.14 85.7953   3
  -1 -19   1 1167.62 87.4325   3
  -1 -19   0 443.075 57.8679   3
   1 -19   0 379.208 51.5620   3
   1 -19   1 2133.47 112.943   3
  -1 -19  -1 2160.44 116.755   3
   1 -19   2-25.5671 27.0394   3
  -1 -19  -2 4.47368 25.7724   3
   1 -19   3 142.127 32.0973   3
  -1 -19  -3 169.949 34.1624   3
  -1 -19  -4-9.69084 28.9620   3
   1 -19   4 29.1836 24.9398   3
  -1 -19  -5 1817.08 109.261   3
   1 -19   5 1725.72 104.127   3
  -1 -19  -6 1820.31 112.275   3
   1 -19   6 1623.74 83.1479   1
  -1 -19  -7 8902.71 240.338   3
   1 -19   7 7566.50 174.250   1
   1 -19   8 2793.67 104.779   1
  -1 -19  -8 3299.20 151.160   3
   1 -19   9 13129.5 221.251   1
  -1 -19  -9 15307.6 324.787   3
   1 -19  10 573.382 47.1610   1
  -1 -19 -10 710.501 80.8592   3
  -1 -19 -11 11334.6 281.482   3
   1 -19  11 9944.86 182.985   1
  -1 -19 -12 125.769 39.1924   3
   1 -19  12 83.6184 21.7121   1
  -1 -19 -13 2348.70 134.010   3
   1 -19  13 2058.86 77.8848   1
   1 -19  14 194.564 26.1331   1
   1  19  14 176.315 18.9351   2
  -1 -19 -14 183.974 40.6452   3
   1  19  15 372.589 21.8539   2
  -1 -19 -15 309.883 47.6671   3
  -1 -19 -16 80.2138 29.2442   3
  -1 -19 -17-44.0564 38.8306   3
  -1 -19 -18-75.6213 43.0983   3
  -1 -19 -19 239.007 48.3714   3
  -1 -19 -20 474.059 67.8307   3
  -1 -19 -21 1204.06 105.709   3
  -1 -19 -22 517.223 73.7027   3
  -1 -19 -23 564.461 76.8665   3
  -1 -19 -24 93.7293 39.2243   3
   1 -21 -23-45.2439 36.3854   3
   1 -21 -22-34.0918 37.0714   3
   1 -21 -21-33.7943 45.7606   3
   1 -21 -20-66.6128 50.1718   3
   1 -21 -19-24.1985 45.0441   3
   1 -21 -18 10.0137 35.9893   3
   1 -21 -17 187.000 44.2307   3
   1 -21 -16 7.89812 27.5743   3
   1 -21 -15 191.666 48.6612   3
  -1 -21  14 48.4542 18.3578   1
   1 -21 -14 39.3313 29.5861   3
  -1 -21  13 110.945 26.2172   1
   1 -21 -13 110.850 39.6063   3
   1 -21 -12 1992.35 127.552   3
  -1 -21  12 1630.82 82.1593   1
   1 -21 -11 660.669 79.1151   3
  -1 -21  11 490.380 48.0771   1
   1 -21 -10 7051.14 231.146   3
  -1 -21  10 5795.57 160.137   1
  -1 -21   9 100.186 27.3199   1
   1 -21  -9 122.482 40.1889   3
  -1 -21   8 2285.45 104.459   1
   1 -21  -8 2484.45 136.914   3
   1 -21  -7-58.0133 38.6217   3
  -1 -21   7 42.3691 21.9197   1
  -1 -21   6 287.425 43.3288   1
   1 -21  -6 272.983 44.2019   3
  -1 -21   6 180.048 28.6530   3
  -1 -21   5 256.117 42.7518   1
  -1 -21   5-9.66447 41.4935   3
   1 -21  -5 147.554 36.9410   3
  -1 -21   4 974.791 80.2312   3
   1 -21  -4 1196.57 96.2741   3
   1 -21  -3 4231.10 176.022   3
  -1 -21   3 4049.93 165.075   3
   1 -21  -2 474.728 66.2766   3
  -1 -21   2 393.221 56.8251   3
   1 -21  -1 14125.3 314.296   3
  -1 -21   1 13848.6 304.316   3
  -1 -21   0 1120.65 92.4114   3
   1 -21   0 1114.76 95.8310   3
  -1 -21  -1 14317.3 316.263   3
   1 -21   1 13863.4 301.748   3
   1 -21   2 2413.20 128.203   3
  -1 -21  -2 2394.79 134.156   3
  -1 -21  -3 4517.22 179.660   3
   1 -21   3 4161.85 167.124   3
   1 -21   4 2.31433 39.0999   3
  -1 -21  -4 177.801 42.3205   3
  -1 -21  -5 6.85468 31.6284   3
   1 -21   5-166.976 51.9137   3
   1 -21   6 60.8724 26.2678   1
  -1 -21  -6-111.308 42.9993   3
  -1 -21  -7 1991.93 122.531   3
   1 -21   7 1821.21 92.1224   1
  -1 -21  -8-26.6547 31.1373   3
   1 -21   8 12.2339 19.1952   1
  -1 -21  -9 4786.13 190.170   3
   1 -21   9 4153.28 133.921   1
   1 -21  10 356.227 40.6788   1
  -1 -21 -10 506.779 69.2991   3
   1 -21  11 2957.71 107.838   1
  -1 -21 -11 3380.58 166.042   3
   1 -21  12 202.427 28.9913   1
  -1 -21 -12 269.537 51.8900   3
   1 -21  13 43.1611 17.0176   1
  -1 -21 -13 18.0920 28.1457   3
  -1 -21 -14 182.945 47.0410   3
  -1 -21 -15 542.798 72.9263   3
  -1 -21 -16-24.7954 37.4098   3
  -1 -21 -17-9.32767 39.4857   3
  -1 -21 -18 30.9907 32.3737   3
  -1 -21 -19-47.4770 41.2672   3
  -1 -21 -20-70.6375 50.3335   3
  -1 -21 -21-112.080 50.4895   3
  -1 -21 -22 43.6380 30.8492   3
   1 -23 -21 130.229 46.7171   3
   1 -23 -20-62.1213 47.9995   3
   1 -23 -19-119.523 51.1851   3
   1 -23 -18 8.48025 32.2943   3
   1 -23 -17 469.123 72.1635   3
   1 -23 -16 13.3732 32.9019   3
   1 -23 -15 1773.71 129.834   3
   1 -23 -14 793.764 90.9402   3
   1 -23 -13 941.543 96.9155   3
   1 -23 -12 430.510 70.2487   3
   1 -23 -11 70.6332 35.5207   3
  -1 -23  11-21.2716 22.7923   1
   1 -23 -10 191.427 49.5956   3
  -1 -23  10 221.371 36.3908   1
   1 -23  -9 72.9695 35.4064   3
  -1 -23   9 46.6435 22.0873   1
  -1 -23   8 95.0971 28.0404   1
   1 -23  -8 116.866 42.3536   3
   1 -23  -7 3.43779 31.5398   3
   1 -23  -6-26.6283 33.3697   3
   1 -23  -5 754.817 82.3834   3
  -1 -23   5 599.807 67.1932   3
  -1 -23   4 35.1848 36.0166   3
   1 -23  -4 146.426 47.4773   3
   1 -23  -3 4623.42 188.675   3
  -1 -23   3 4441.91 183.133   3
   1 -23  -2 1241.32 104.991   3
  -1 -23   2 1230.60 97.9905   3
   1 -23  -1 7948.68 247.834   3
  -1 -23   1 7570.33 237.264   3
   1 -23   0 9978.00 272.911   3
  -1 -23   0 9936.53 276.301   3
   1 -23   1 4490.86 183.882   3
  -1 -23  -1 4606.19 192.106   3
   1 -23   2 6916.52 227.953   3
  -1 -23  -2 7372.56 238.678   3
  -1 -23  -3 779.455 81.6728   3
   1 -23   3 698.859 74.3430   3
   1 -23   4 588.252 66.5986   3
  -1 -23  -4 679.920 78.0165   3
  -1 -23  -5 106.283 36.3865   3
   1 -23   5 19.4335 38.4343   3
  -1 -23  -6-56.7104 34.7658   3
   1 -23   7 28.2678 21.0222   1
  -1 -23  -7 101.497 38.0725   3
   1 -23   8-5.38888 18.3927   1
  -1 -23  -8 48.1078 36.7883   3
   1 -23   9 615.672 56.7532   1
  -1 -23  -9 833.264 90.2984   3
  -1 -23 -10 362.710 58.4557   3
   1 -23  10 279.326 38.6171   1
  -1 -23 -11 1254.98 106.614   3
  -1 -23 -12 85.1236 38.0924   3
  -1 -23 -13 469.770 70.8941   3
  -1 -23 -14 1694.29 127.491   3
  -1 -23 -15 69.8349 36.3601   3
  -1 -23 -16 994.730 101.437   3
  -1 -23 -17-80.7824 43.8255   3
  -1 -23 -18-119.632 49.8573   3
  -1 -23 -19-71.2834 43.9806   3
  -1 -23 -20 184.353 50.6707   3
   1 -25 -18 238.016 53.0829   3
   1 -25 -17-20.9328 39.1222   3
   1 -25 -16 31.8985 31.4123   3
   1 -25 -15 1096.55 107.437   3
   1 -25 -14 401.077 70.5605   3
   1 -25 -13 2227.91 152.076   3
   1 -25 -12 395.418 71.1374   3
   1 -25 -11 1047.40 105.374   3
   1 -25 -10-4.97236 29.8645   3
   1 -25  -9 105.827 37.7006   3
   1 -25  -8-93.0359 48.8725   3
   1 -25  -7 81.3298 31.6229   3
   1 -25  -6 44.2647 31.3563   3
   1 -25  -5 917.245 95.2078   3
  -1 -25   5 743.278 82.4104   3
  -1 -25   4 72.8716 30.3967   3
   1 -25  -4 109.706 40.5434   3
  -1 -25   3 1204.35 102.047   3
   1 -25  -3 1333.59 110.380   3
  -1 -25   2 181.134 45.2266   3
   1 -25  -2 145.481 41.3464   3
   1 -25  -1 247.247 53.4659   3
  -1 -25   1 261.350 51.4709   3
  -1 -25   0 1784.44 123.314   3
   1 -25   0 1693.04 119.898   3
  -1 -25  -1 168.722 44.6772   3
   1 -25   1 147.577 42.7048   3
  -1 -25  -2 282.530 58.6129   3
   1 -25   2 217.592 46.5188   3
  -1 -25  -3 277.654 54.5387   3
   1 -25   3 234.087 50.7325   3
  -1 -25  -4 696.968 83.0613   3
   1 -25   4 650.877 77.1644   3
   1 -25   5 12.7532 25.7340   3
  -1 -25  -5-2.46583 29.8046   3
  -1 -25  -6 502.543 72.6833   3
  -1 -25  -7-75.8014 39.2913   3
  -1 -25  -8 269.872 55.6908   3
  -1 -25  -9 67.1601 35.9371   3
  -1 -25 -10 1502.00 121.295   3
  -1 -25 -11 719.919 89.3192   3
  -1 -25 -12 1482.58 123.752   3
  -1 -25 -13 1566.01 126.832   3
  -1 -25 -14-11.6637 32.0425   3
  -1 -25 -15 802.128 93.7213   3
  -1 -25 -16-53.6544 42.9079   3
  -1 -25 -17-101.838 51.5954   3
   1 -27 -14 49.7568 43.0946   3
   1 -27 -13 908.920 101.340   3
   1 -27 -12 251.605 59.9814   3
   1 -27 -11 913.082 102.091   3
   1 -27 -10 367.176 67.2348   3
   1 -27  -9 204.386 50.6785   3
   1 -27  -8-112.660 46.9996   3
   1 -27  -7 121.714 32.0453   3
   1 -27  -6 221.029 52.9498   3
  -1 -27   5 774.111 89.2224   3
   1 -27  -5 790.135 93.8142   3
   1 -27  -4 81.0376 37.1839   3
  -1 -27   4 65.8912 35.2773   3
  -1 -27   3 472.805 70.8845   3
   1 -27  -3 473.563 72.3799   3
   1 -27  -2-20.7831 35.1673   3
  -1 -27   2 25.6678 31.8297   3
   1 -27  -1-35.7283 34.5968   3
  -1 -27   1-23.0177 38.6170   3
  -1 -27   0 10.8501 31.2499   3
   1 -27   0 119.383 43.8893   3
   1 -27   1 73.3368 35.4561   3
  -1 -27  -1 65.6889 34.5827   3
  -1 -27  -2 128.459 41.5474   3
   1 -27   2 103.851 38.1853   3
   1 -27   3-23.8177 30.5282   3
  -1 -27  -3-24.6603 33.5789   3
   1 -27   4 533.361 74.9679   3
  -1 -27  -4 604.864 80.8238   3
  -1 -27  -5 82.9198 43.0864   3
  -1 -27  -6-64.6873 45.1080   3
  -1 -27  -7-66.1250 47.7283   3
  -1 -27  -8 710.693 87.1604   3
  -1 -27  -9-17.0941 38.9438   3
  -1 -27 -10-9.24640 29.1520   3
  -1 -27 -11 100.368 36.7673   3
  -1 -27 -12 1064.22 111.629   3
  -1 -27 -13 44.5654 34.3494   3
  -1 -27 -14 250.106 54.6938   3
   1 -29  -9 275.931 70.4728   3
   1 -29  -8 541.513 86.0167   3
   1 -29  -7 206.824 57.8748   3
   1 -29  -6 24.7357 30.8515   3
   1 -29  -5-1.05869 32.6754   3
  -1 -29   4-19.9491 33.0602   3
   1 -29  -4-24.5645 38.2495   3
  -1 -29   3 28.4596 32.5717   3
   1 -29  -3-35.8162 33.3675   3
  -1 -29   2 31.8516 35.0524   3
   1 -29  -2 86.6109 40.9060   3
   1 -29  -1 76.4944 40.9290   3
  -1 -29   1 14.2655 29.8737   3
  -1 -29   0-4.97753 33.5688   3
   1 -29   0 78.9446 42.0101   3
  -1 -29  -1 62.9742 38.4855   3
   1 -29   1 90.7149 39.2184   3
   1 -29   2-35.3143 31.3428   3
  -1 -29  -2 4.34501 28.0870   3
  -1 -29  -3 24.2165 37.0220   3
   1 -29   3 18.6795 31.6335   3
  -1 -29  -4-22.3080 35.1826   3
   1 -29   4 19.5384 27.4471   3
  -1 -29  -5 693.148 92.4733   3
  -1 -29  -6 921.130 106.746   3
  -1 -29  -7 4245.47 214.721   3
  -1 -29  -8 1846.43 145.602   3
   2   0 -32 164.694 54.2486   3
   2   0 -31 61.3442 35.1849   3
   2   0 -30 66.3832 40.0218   3
   2   0 -29 21.9060 27.0831   3
   2   0 -28 411.886 59.1715   3
   2   0 -27 13.0977 23.1445   3
   2   0 -26 190.986 39.8779   3
   2   0 -25-3.39927 23.5451   3
   2   0 -24-41.6466 34.0744   3
   2   0 -23-37.5248 29.8009   3
   2   0 -22 440.508 52.5344   3
   2   0 -21-31.5075 30.7337   3
   2   0 -20-10.7590 22.9345   3
   2   0 -19 46.2364 26.7362   3
   2   0 -18 7460.81 180.827   3
   2   0 -17 34.3567 25.7219   3
   2   0 -16 9277.39 188.438   3
   2   0 -15-5.55747 15.9610   3
   2   0 -14 1213.61 65.7577   3
   2   0 -13 19.9700 18.9905   3
   2   0 -12 20558.0 243.229   3
   2   0 -11-4.23767 17.0603   3
   2   0 -10 5312.17 113.166   3
   2   0  -9 3.84085 16.7668   3
   2   0  -8 646.406 38.2240   3
   2   0  -7 9.46805 14.9451   3
   2   0  -6 419.711 26.3609   3
   2   0  -5 8.12808 11.2170   3
   2   0  -4 10456.4 93.0295   3
   2   0  -3 7.41777 6.28190   3
  -2   0  -2 3075.60 43.6920   3
  -2   0  -3 20.3885 10.2727   3
  -2   0  -4 844.765 33.2369   3
  -2   0  -5-7.44192 13.4324   3
  -2   0  -6 747.053 37.5056   3
  -2   0  -7 9.21285 16.9410   3
  -2   0  -8 887.159 46.6632   3
  -2   0  -9-10.2898 17.2145   3
  -2   0 -10 11850.9 173.270   3
  -2   0 -11 17.3872 20.1377   3
  -2   0 -12 9115.85 166.998   3
  -2   0 -13 27.7028 18.4534   3
  -2   0 -14 2213.63 90.2732   3
  -2   0 -15 34.1557 22.6121   3
  -2   0 -16 11588.1 219.351   3
  -2   0 -17 81.3841 29.4759   3
  -2   0 -18 943.175 69.3355   3
  -2   0 -19 12.9154 18.0971   3
  -2   0 -20 404.452 48.0218   3
  -2   0 -21-33.5141 31.5913   3
  -2   0 -22-58.6228 32.7553   3
  -2   0 -23-30.7147 27.9964   3
  -2   0 -24 56.2323 29.4724   3
  -2   0 -25 5.90099 20.9055   3
  -2   0 -26 10.5511 26.0949   3
  -2   0 -27 39.5333 30.8248   3
  -2   0 -28 0.37345 24.2386   3
  -2   0 -29 4.37251 26.4255   3
  -2   0 -30 47.1480 36.1051   3
  -2   0 -31 108.813 46.9457   3
   2   2 -32 139.854 53.4068   3
   2  -2 -32 144.843 53.2859   3
   2   2 -31 59.6067 39.3483   3
   2  -2 -31 57.6957 36.3261   3
   2   2 -30 27.6061 33.1472   3
   2  -2 -30 23.9133 33.1176   3
   2   2 -29-6.90436 24.4003   3
   2  -2 -29 13.3879 30.6603   3
   2  -2 -28 833.539 81.6157   3
   2   2 -28 864.275 87.0219   3
   2   2 -27 14.5596 27.0493   3
   2  -2 -27-12.1867 29.0669   3
   2   2 -26 208.907 41.8547   3
   2  -2 -26 152.618 37.6290   3
   2  -2 -25 49.5099 30.1347   3
   2   2 -25-0.41260 25.5909   3
   2  -2 -24 50.8027 26.6379   3
   2   2 -24 70.5515 31.1559   3
   2  -2 -23 172.776 40.5370   3
   2   2 -23 180.830 40.8578   3
   2   2 -22 22.4420 24.6109   3
   2  -2 -22-24.3302 27.6268   3
   2   2 -21 127.100 32.5530   3
   2  -2 -21 57.1439 25.7764   3
   2   2 -20 545.327 55.2563   3
   2  -2 -20 418.178 48.5708   3
   2   2 -19 81.8399 28.5196   3
   2  -2 -19 85.4348 26.5251   3
   2   2 -18 857.320 64.0167   3
   2  -2 -18 775.134 59.7289   3
   2   2 -17 1058.23 69.1767   3
   2  -2 -17 1043.42 66.5194   3
   2   2 -16 1704.74 85.0727   3
   2  -2 -16 1755.50 83.9787   3
   2  -2 -15 867.682 58.3672   3
   2   2 -15 828.387 59.1272   3
   2   2 -14 1664.96 62.7394   3
   2  -2 -14 3276.04 107.251   3
   2  -2 -13 20616.7 251.519   3
   2  -2 -12 9071.83 160.725   3
   2  -2 -11 28841.3 268.513   3
  -2   2  11 28160.6 274.212   3
   2  -2 -10 991.042 51.6659   3
  -2   2  10 939.927 48.3633   3
   2  -2  -9 7284.05 123.117   3
  -2   2   9 7271.41 124.752   3
  -2   2   8 1071.91 46.2181   3
   2  -2  -8 994.337 46.0431   3
  -2   2   7 358.284 26.8366   3
   2  -2  -7 329.471 26.4137   3
  -2   2   6 776.160 34.5577   3
   2  -2  -6 738.020 35.0196   3
  -2   2   5 767.678 31.1794   3
   2  -2  -5 775.740 32.8401   3
  -2   2   4 8.99768 8.77861   3
   2  -2  -4 7.30834 10.1088   3
  -2  -2   3 35.2395 7.52848   1
   2   2  -3 36.3771 7.60313   1
   2  -2  -3 30.8916 9.42019   3
  -2   2   3 37.3858 8.26721   3
   2   2  -2 68.6013 7.80610   1
  -2   2   2 73.3960 8.01032   3
  -2  -2   2 82.0684 8.68224   1
   2  -2  -2 79.7145 9.19518   3
   2   2  -2 77.5557 8.37071   3
  -2  -2   1 316.118 14.7757   3
   2   2  -1 52.1658 9.22716   1
  -2   2   0 6.94241 4.92722   3
  -2  -2   0 15.0679 6.91513   3
  -2  -2  -1 2534.55 40.9218   3
   2   2   1 2330.01 40.0388   3
   2   2   2 4382.76 46.6650   2
  -2  -2  -2 4593.82 60.5261   3
   2   2   2 4397.07 59.1985   3
  -2  -2  -3 1702.43 29.7616   2
   2   2   3 1676.22 30.0962   2
   2   2   3 1632.55 40.9597   3
  -2  -2  -3 1641.92 41.6561   3
  -2  -2  -4 1405.83 29.5492   2
  -2  -2  -4 1514.81 43.9822   3
   2   2   4 1509.01 43.1072   3
   2   2   5 223.813 20.8471   3
  -2  -2  -5 249.254 23.0349   3
  -2  -2  -6 1909.26 57.8208   3
   2   2   6 1920.03 57.8477   3
  -2  -2  -7 1310.75 51.3352   3
   2   2   7 1320.11 51.9705   3
  -2  -2  -8 550.483 38.4475   3
   2   2   8 531.518 36.6338   3
  -2  -2  -9 21505.8 225.512   3
   2   2   9 21781.2 229.146   3
  -2  -2 -10 10508.7 164.471   3
   2   2  10 10402.8 170.773   3
  -2  -2 -11 29860.0 291.238   3
  -2  -2 -12 10962.8 183.995   3
  -2   2 -13 2756.26 87.0679   3
  -2  -2 -13 3534.99 110.915   3
  -2  -2 -14 23.5437 19.8753   3
  -2   2 -14 9.73361 16.9601   3
  -2  -2 -15 279.152 35.2378   3
  -2   2 -15 338.818 42.8417   3
  -2  -2 -16 1478.92 78.9043   3
  -2   2 -16 1484.72 81.0940   3
  -2  -2 -17 617.814 54.4942   3
  -2   2 -17 686.321 59.3881   3
  -2   2 -18 34.8958 22.7280   3
  -2  -2 -18-10.6982 21.9663   3
  -2   2 -19 703.522 62.0519   3
  -2  -2 -19 678.878 61.2212   3
  -2   2 -20 309.928 43.7581   3
  -2  -2 -20 241.471 40.5548   3
  -2   2 -21 1243.34 85.1582   3
  -2  -2 -21 1119.53 82.8703   3
  -2  -2 -22 149.703 36.2214   3
  -2   2 -22 157.611 34.6318   3
  -2  -2 -23 87.8514 31.4895   3
  -2   2 -23 74.9911 29.2884   3
  -2  -2 -24-40.2315 30.3164   3
  -2   2 -24 2.30284 24.4307   3
  -2  -2 -25 14.3911 25.1278   3
  -2   2 -25-40.5721 30.9920   3
  -2   2 -26 114.785 37.2292   3
  -2  -2 -26 93.4386 32.3162   3
  -2   2 -27 224.580 51.2270   3
  -2  -2 -27 174.394 42.4003   3
  -2  -2 -28 86.1189 35.3621   3
  -2   2 -28 98.4754 37.5180   3
  -2  -2 -29 140.986 43.3771   3
  -2   2 -29 107.592 38.2968   3
  -2   2 -30 37.8538 36.8861   3
  -2  -2 -30 55.1434 43.1791   3
  -2   2 -31 94.9062 46.9015   3
  -2  -2 -31 136.505 51.1460   3
   2   4 -32 44.7578 30.8242   3
   2  -4 -32 4.63125 30.7417   3
   2   4 -31 15.8683 27.9695   3
   2  -4 -31 22.2309 34.7134   3
   2  -4 -30 40.6421 33.4068   3
   2   4 -30 16.8500 34.4185   3
   2  -4 -29 12.9418 24.7771   3
   2   4 -29 26.5829 27.5545   3
   2  -4 -28 53.7151 29.8482   3
   2   4 -28 90.1061 30.5203   3
   2   4 -27 37.8304 25.6396   3
   2  -4 -27 42.1594 27.4935   3
   2   4 -26 179.484 37.6583   3
   2  -4 -26 186.484 41.1751   3
   2  -4 -25 15.3448 27.9021   3
   2   4 -25 90.2381 37.2201   3
   2  -4 -24 1894.93 114.260   3
   2   4 -24 2016.25 116.727   3
   2  -4 -23 142.197 44.9592   3
   2   4 -23 204.948 52.8181   3
   2   4 -22 2120.04 114.804   3
   2  -4 -22 2103.65 113.342   3
   2   4 -21 696.883 66.5443   3
   2  -4 -21 575.475 62.5694   3
   2  -4 -20 33.4718 25.6733   3
   2   4 -20 84.9669 34.2161   3
   2  -4 -19 335.559 44.1087   3
   2   4 -19 348.401 40.5314   3
   2  -4 -18 48.9400 19.6051   3
   2  -4 -17 119.175 27.2922   3
  -2   4  16-7.50327 16.5215   3
   2  -4 -16 42.4950 22.3062   3
  -2   4  15 4243.69 127.960   3
   2  -4 -15 3928.14 123.104   3
  -2   4  14 0.56644 15.7855   3
   2  -4 -14-4.93234 16.8734   3
   2  -4 -13 25583.7 291.149   3
  -2   4  13 25786.6 290.057   3
   2  -4 -12 2445.26 87.3838   3
  -2   4  12 2310.87 86.5881   3
  -2   4  11 32658.1 303.205   3
   2  -4 -11 32364.0 297.145   3
   2  -4 -10 5597.17 119.730   3
  -2   4  10 5649.81 119.678   3
   2  -4  -9 7980.40 137.686   3
   2   4  -9 7951.49 90.8588   1
  -2   4   9 7878.11 137.175   3
   2  -4  -8 40.3826 18.3223   3
  -2   4   8 49.3971 15.5700   3
   2   4  -8 52.9222 11.2622   1
   2   4  -7 648.807 26.2597   1
  -2   4   7 668.757 37.8746   3
   2  -4  -7 678.769 39.6475   3
  -2   4   6 25613.0 206.987   3
   2  -4  -6 26216.0 209.882   3
   2   4  -6 25557.8 152.416   1
  -2  -4   5 478.361 21.7102   1
   2  -4  -5 487.250 31.6515   3
  -2   4   5 494.576 29.4648   3
   2   4  -5 481.349 22.0591   1
   2   4  -4 812.887 28.5455   1
   2  -4  -4 784.500 34.8113   3
  -2   4   4 780.795 33.5598   3
  -2  -4   4 780.538 28.1319   1
   2   4  -3 245.772 20.5040   3
  -2   4   3 249.269 20.0756   3
   2   4  -3 301.581 21.1940   1
  -2  -4   3 232.522 18.0066   1
   2  -4  -3 228.866 21.0091   3
  -2  -4   2 374.634 23.0086   1
   2   4  -2 355.062 23.8374   3
  -2  -4   2 344.735 23.2832   3
  -2   4   2 342.003 21.5432   3
   2  -4  -2 345.025 23.8566   3
  -2   4   1 2.06595 10.1499   3
  -2  -4   1 5.02151 11.8070   3
   2   4  -1 11.6354 10.2323   3
   2  -4  -1 9.08699 11.9674   3
   2   4   0 167.875 16.9198   3
  -2   4   0 166.937 17.1369   3
  -2  -4   0 181.141 19.1634   3
   2  -4   0 164.965 18.2450   3
  -2   4  -1 266.313 20.8956   3
   2  -4   1 242.892 21.3169   3
   2   4   1 242.336 18.3801   3
  -2  -4  -1 247.432 20.9124   3
  -2   4  -2 12.9652 11.9591   3
   2   4   2 9.51012 10.6801   3
  -2  -4  -2 1.48361 13.6159   3
  -2  -4  -3 85.5967 16.6471   3
   2   4   3 86.1957 15.9941   3
   2   4   4 11141.2 84.1366   2
   2   4   4 11532.5 132.570   3
  -2  -4  -4 11296.1 132.046   3
  -2  -4  -5 11.7811 15.7959   3
   2   4   5 15.7843 7.87098   2
   2   4   5 9.96800 11.8310   3
  -2  -4  -6 6475.07 111.961   3
   2   4   6 6666.26 112.175   3
  -2  -4  -7 4079.77 53.8772   2
  -2  -4  -7 4315.14 96.6318   3
   2   4   7 4444.49 97.8646   3
  -2  -4  -8 2652.55 79.1116   3
   2   4   8 2559.39 79.7967   3
  -2  -4  -8 2572.41 45.1397   2
  -2  -4  -9 17337.6 212.000   3
   2   4   9 17936.4 213.037   3
  -2  -4  -9 17119.0 121.460   2
  -2  -4 -10 4744.79 67.8488   2
  -2  -4 -10 4737.49 115.134   3
   2   4  10 4984.99 120.431   3
   2   4  11 31274.2 313.724   3
  -2  -4 -11 29917.8 177.601   2
  -2  -4 -11 30417.2 302.541   3
  -2  -4 -12 62.8139 12.3027   2
   2   4  12 50.6572 16.7412   3
  -2  -4 -12 54.8033 23.2798   3
   2   4  13 11843.9 206.012   3
  -2  -4 -13 11438.6 120.187   2
  -2  -4 -13 11554.5 202.442   3
  -2  -4 -14 281.390 36.7017   3
   2   4  14 256.314 32.5744   3
   2   4  15 109.393 24.4915   3
  -2  -4 -15 92.0140 24.9649   3
  -2  -4 -16 15.7222 17.1671   3
  -2  -4 -17 397.930 47.0341   3
  -2  -4 -18 41.1344 23.0233   3
  -2   4 -18 5.26642 21.8413   3
  -2   4 -19 923.649 74.2045   3
  -2  -4 -19 993.848 74.7701   3
  -2   4 -20 1467.99 91.7128   3
  -2  -4 -20 1429.40 91.9958   3
  -2  -4 -21 686.913 68.9890   3
  -2   4 -21 738.622 69.6218   3
  -2   4 -22 4990.57 175.546   3
  -2  -4 -22 4751.65 104.566   2
  -2  -4 -22 4942.12 174.260   3
  -2  -4 -23 248.868 52.3111   3
  -2   4 -23 313.895 53.5208   3
  -2  -4 -23 171.548 24.4109   2
  -2  -4 -24 1245.09 56.2981   2
  -2  -4 -24 1289.95 94.7747   3
  -2   4 -24 1337.87 96.9461   3
  -2   4 -25 19.8342 22.4046   3
  -2  -4 -25 29.9858 24.2399   3
  -2  -4 -25 33.0251 14.7043   2
  -2  -4 -26-0.58841 25.2221   3
  -2   4 -26-6.28560 24.3267   3
  -2  -4 -26 10.8488 10.0541   2
  -2  -4 -27-14.8266 26.8278   3
  -2   4 -27 5.55005 26.2360   3
  -2  -4 -28 43.1911 24.9522   3
  -2   4 -28 40.1161 27.8794   3
  -2   4 -29-41.9761 27.3443   3
  -2  -4 -29-9.48875 28.5053   3
  -2  -4 -30 29.5180 33.5988   3
  -2   4 -30-26.1261 32.6832   3
  -2   4 -31 23.7357 33.4305   3
  -2  -4 -31-24.4926 26.7068   3
   2   6 -31-42.3180 39.2674   3
   2  -6 -31 7.25242 31.5871   3
   2  -6 -30 84.9552 34.2845   3
   2   6 -30 141.622 42.4707   3
   2  -6 -29-9.63680 26.6170   3
   2   6 -29-28.5546 29.3319   3
   2   6 -28 13.0785 28.9987   3
   2  -6 -28-19.6023 33.9482   3
   2  -6 -27 178.535 43.7955   3
   2   6 -27 142.309 39.8519   3
   2   6 -26 258.877 49.9929   3
   2   6 -26 233.813 26.7335   1
   2  -6 -26 230.765 47.2761   3
   2   6 -25 2524.33 77.3717   1
   2   6 -25 2804.45 140.603   3
   2  -6 -25 2586.41 135.505   3
   2  -6 -25 2273.39 45.0612   2
   2  -6 -24 1932.07 115.329   3
   2   6 -24 1676.73 63.9740   1
   2  -6 -24 1513.63 37.2291   2
   2   6 -24 1978.37 120.880   3
   2   6 -23 6026.40 115.409   1
   2  -6 -23 5655.10 70.4739   2
   2   6 -23 6389.32 203.774   3
   2  -6 -23 6307.84 197.993   3
   2  -6 -22 1121.51 30.9359   2
   2   6 -22 1265.49 54.3350   1
   2  -6 -22 1489.15 99.7530   3
   2   6 -21 2801.69 76.0326   1
   2  -6 -21 2585.57 45.1952   2
   2  -6 -21 2991.60 130.770   3
   2   6 -20 55.5423 14.8017   1
   2  -6 -20 45.9694 7.52497   2
   2  -6 -20 81.4137 29.0104   3
   2   6 -19 27.0094 9.69329   1
   2  -6 -19 22.0724 5.24198   2
   2  -6 -19 16.2139 18.8251   3
   2   6 -18 117.908 16.2067   1
  -2   6  18 107.136 26.7201   3
   2  -6 -18 117.090 8.55621   2
   2  -6 -18 155.818 30.6381   3
   2   6 -17 3.07653 8.00464   1
   2  -6 -17 6.57878 16.9037   3
  -2   6  17 21.3342 15.9971   3
  -2   6  16 152.713 30.5494   3
   2   6 -16 128.090 16.2651   1
   2  -6 -16 112.781 25.2805   3
   2  -6 -15-16.5707 21.8069   3
   2   6 -15-3.11336 8.68324   1
  -2   6  15 2.35726 15.0383   3
   2  -6 -14 83.3636 22.9502   3
  -2   6  14 100.245 21.6083   3
   2   6 -14 114.531 14.7077   1
   2  -6 -13 212.656 30.1817   3
   2   6 -13 226.077 18.5933   1
  -2   6  13 256.864 31.5987   3
  -2   6  12 5205.66 131.977   3
   2   6 -12 4964.66 81.5166   1
   2  -6 -12 5000.01 128.263   3
  -2   6  11 2986.85 97.0615   3
   2  -6 -11 2973.35 95.9604   3
   2   6 -11 2902.86 61.3225   1
  -2   6  10 5488.98 124.631   3
   2   6 -10 5456.23 82.3148   1
   2  -6 -10 5505.99 125.718   3
   2  -6  -9 4784.41 112.177   3
  -2   6   9 4837.76 114.544   3
   2   6  -9 4766.02 76.7010   1
  -2   6   8 711.483 43.6722   3
   2   6  -8 710.343 30.3877   1
   2  -6  -8 669.022 43.7449   3
  -2   6   7 498.430 35.1903   3
   2  -6  -7 519.645 38.3630   3
  -2  -6   7 522.857 25.9091   1
   2   6  -7 528.358 26.6739   1
   2   6  -6 26976.7 179.869   1
  -2   6   6 26741.8 234.915   3
  -2  -6   6 26263.4 177.583   1
   2  -6  -6 27152.3 238.815   3
  -2  -6   5 398.431 24.4512   1
   2  -6  -5 421.766 32.7040   3
  -2   6   5 411.201 30.7579   3
   2   6  -5 419.964 31.4529   3
  -2  -6   4 5329.80 84.6241   1
   2  -6  -4 5506.52 103.253   3
  -2   6   4 5294.05 98.7365   3
   2   6  -4 5602.46 103.332   3
   2  -6  -3 80.4536 20.7616   3
  -2  -6   3 133.374 18.7786   1
  -2   6   3 101.539 17.7739   3
   2   6  -3 76.5354 18.4862   3
  -2  -6   3 102.354 22.5175   3
   2   6  -2 576.898 35.0107   3
  -2  -6   2 572.001 36.6627   3
  -2   6   2 545.638 33.5638   3
   2  -6  -2 562.502 34.9267   3
  -2  -6   1 550.540 35.0845   3
   2   6  -1 521.604 33.1590   3
  -2   6   1 507.126 32.4783   3
   2  -6  -1 614.837 36.5138   3
   2  -6   0 125.791 21.6103   3
  -2  -6   0 126.235 22.4385   3
  -2   6   0 122.431 19.3223   3
   2   6   0 122.730 19.5271   3
   2  -6   1 32.9024 17.3968   3
  -2   6  -1 37.6317 14.8432   3
   2   6   1 30.1934 15.5360   3
  -2  -6  -1 75.8116 20.5327   3
  -2   6  -2 27.0651 14.9710   3
   2  -6   2 47.1199 20.0481   3
   2   6   2-1.36881 12.7255   3
  -2  -6  -2 39.3694 19.1421   3
  -2  -6  -3 570.905 36.1675   3
   2   6   3 569.433 34.5114   3
  -2   6  -3 591.404 36.2427   3
   2   6   4 25061.6 219.368   3
  -2  -6  -4 25702.6 226.789   3
  -2   6  -4 25796.1 227.802   3
  -2  -6  -5 28.5576 18.8826   3
   2  -6   5 18.7826 8.87825   1
   2   6   5 16.5877 13.4037   3
   2  -6   6 8675.76 72.3521   1
   2   6   6 8929.36 142.872   3
  -2  -6  -6 8581.38 141.808   3
   2   6   6 8723.58 83.4167   2
  -2  -6  -7 1998.46 70.8440   3
   2   6   7 1940.58 38.8799   2
   2   6   7 1991.57 72.1406   3
   2   6   8 4230.82 107.796   3
  -2  -6  -8 4268.62 106.908   3
   2   6   9 3651.45 102.499   3
  -2  -6  -9 3688.03 103.748   3
   2   6  10 10804.6 183.080   3
  -2  -6 -10 10424.1 181.396   3
  -2  -6 -11 576.915 47.1534   3
   2   6  11 629.921 47.5347   3
  -2  -6 -12 1108.85 64.7579   3
  -2   6 -12 1128.12 24.5068   1
   2   6  12 1188.40 66.2646   3
  -2  -6 -13-7.25665 20.6976   3
   2   6  13 5.27544 17.9159   3
  -2  -6 -13 9.13395 5.72972   2
  -2   6 -13 6.28892 4.88763   1
   2   6  14-6.53043 18.0191   3
  -2   6 -14 1.36797 5.32056   1
  -2  -6 -14 1.99273 18.2701   3
  -2  -6 -14 7.01828 6.24220   2
  -2  -6 -15 18.6828 7.49093   2
   2   6  15-2.41349 14.3151   3
  -2  -6 -15-9.05687 19.8037   3
  -2   6 -15 6.03902 4.69305   1
  -2  -6 -16 3.26850 17.8300   3
   2   6  16 13.7193 15.2624   3
  -2  -6 -16 24.8719 8.16287   2
  -2   6 -16 32.1898 7.07294   1
  -2  -6 -17 13.1264 6.44382   2
  -2   6 -17 15.5427 6.16629   1
  -2  -6 -17 15.3873 19.8384   3
   2   6  17 18.6718 15.9538   3
  -2   6 -18 126.598 12.4346   1
  -2  -6 -18 129.469 14.7833   2
  -2  -6 -18 133.333 32.1490   3
  -2   6 -19 1017.70 33.4861   1
  -2  -6 -19 1006.45 39.0585   2
  -2  -6 -19 1036.07 76.7022   3
  -2  -6 -20 2188.54 113.883   3
  -2  -6 -20 1911.71 54.4860   2
  -2   6 -20 1949.68 46.9401   1
  -2  -6 -21 4422.42 84.4541   2
  -2  -6 -21 5065.77 174.628   3
  -2   6 -21 4602.86 73.0047   1
  -2  -6 -22 4454.15 168.569   3
  -2  -6 -22 3845.92 80.4503   2
  -2   6 -22 4055.54 69.2722   1
  -2   6 -22 4320.98 167.107   3
  -2   6 -23 3961.74 162.870   3
  -2   6 -23 3622.17 65.5866   1
  -2  -6 -23 3827.71 158.889   3
  -2  -6 -23 3503.98 77.0581   2
  -2   6 -24 1691.09 44.7340   1
  -2  -6 -24 1678.24 53.5453   2
  -2  -6 -24 1907.27 116.493   3
  -2   6 -24 1876.28 116.059   3
  -2  -6 -25 362.489 54.7883   3
  -2   6 -25 396.423 58.8584   3
  -2   6 -26 39.6562 25.3523   3
  -2  -6 -26 178.883 42.7915   3
  -2  -6 -27 46.6679 30.9584   3
  -2   6 -27 3.04546 32.5862   3
  -2   6 -28 39.6358 31.1659   3
  -2  -6 -28-8.62480 26.0336   3
  -2  -6 -29 90.3441 38.0224   3
  -2   6 -29 70.2569 32.1390   3
  -2  -6 -30-28.8647 33.3902   3
  -2   6 -30 12.6053 27.1119   3
   2   8 -31 101.818 40.0334   3
   2  -8 -31 82.4603 38.2830   3
   2  -8 -30 7.53502 31.1362   3
   2   8 -30-4.78230 32.6887   3
   2   8 -29-3.70311 32.8171   3
   2  -8 -29 40.0715 34.0938   3
   2  -8 -28 25.3846 30.1349   3
   2   8 -28 43.3841 30.4089   3
   2  -8 -27 10.9988 24.6381   3
   2   8 -27 14.8562 27.7531   3
   2   8 -26 81.4530 34.2731   3
   2  -8 -26 101.676 37.4780   3
   2   8 -25 1024.50 44.1892   1
   2  -8 -25 1022.82 88.5643   3
   2  -8 -24 500.135 64.6673   3
   2   8 -24 559.824 34.0856   1
   2   8 -23 3863.02 84.1790   1
   2  -8 -23 3632.85 156.423   3
   2   8 -22 386.845 29.6789   1
   2  -8 -22 343.515 52.3184   3
   2   8 -21 2275.23 63.7934   1
   2  -8 -21 2135.11 112.853   3
   2  -8 -20 25.4036 20.6114   3
   2   8 -20 72.2522 12.9587   1
   2   8 -19 0.37823 10.4888   1
   2  -8 -19 13.9900 22.9003   3
   2   8 -18 693.698 34.3824   1
   2  -8 -18 700.429 62.1286   3
  -2   8  17 166.295 33.5741   3
   2   8 -17 163.825 16.7122   1
   2  -8 -17 190.223 34.7179   3
  -2   8  16 238.294 34.8603   3
   2  -8 -16 255.610 37.3691   3
   2   8 -16 240.346 20.4707   1
  -2   8  15 409.063 44.5305   3
   2   8 -15 409.562 25.7088   1
   2  -8 -15 433.380 45.2542   3
  -2   8  14 1937.39 90.2293   3
   2  -8 -14 1883.42 90.6125   3
   2   8 -14 1885.24 53.4344   1
   2  -8 -13 5149.40 140.929   3
   2   8 -13 5169.60 88.2049   1
  -2   8  13 5328.93 142.574   3
   2  -8 -12 1902.28 85.7559   3
  -2   8  12 1912.90 85.2616   3
   2   8 -12 1772.45 52.4321   1
   2   8 -11 18006.4 163.759   1
   2  -8 -11 18253.7 250.109   3
  -2   8  11 18575.3 252.835   3
   2  -8 -10 734.181 52.7378   3
  -2   8  10 630.539 47.9126   3
   2   8 -10 677.997 34.1448   1
  -2  -8   9 11606.9 128.391   1
   2  -8  -9 12434.4 193.476   3
  -2   8   9 12102.0 192.222   3
   2   8  -8 5628.24 129.726   3
   2  -8  -8 5489.16 127.217   3
  -2  -8   8 5207.58 88.0595   1
  -2   8   8 5450.59 124.481   3
  -2  -8   7 46.5746 12.3976   1
   2  -8  -7 66.2535 21.1697   3
   2   8  -7 35.0939 15.9608   3
  -2   8   7 60.6403 18.5515   3
  -2  -8   6 8310.54 115.699   1
   2  -8  -6 8444.27 150.285   3
  -2   8   6 8339.91 145.601   3
   2   8  -6 8667.81 151.817   3
  -2   8   5 467.263 35.6973   3
   2  -8  -5 504.005 40.7340   3
   2   8  -5 505.920 39.1907   3
  -2  -8   5 469.501 30.7323   1
  -2  -8   4 696.714 44.5264   3
   2   8  -4 756.259 45.2909   3
  -2   8   4 706.194 43.3161   3
   2  -8  -4 759.447 47.7187   3
  -2  -8   4 762.439 38.9124   1
   2   8  -3 920.498 49.8912   3
  -2   8   3 887.342 46.9721   3
   2  -8  -3 956.297 52.5010   3
  -2  -8   3 872.796 48.1038   3
  -2   8   2 3811.07 97.0193   3
  -2  -8   2 3945.34 99.0952   3
   2  -8  -2 3928.30 100.432   3
   2   8  -2 3849.81 97.6703   3
   2   8  -1 195.909 25.0808   3
   2  -8  -1 179.849 28.4107   3
  -2   8   1 228.169 26.9088   3
  -2  -8   1 219.224 29.5841   3
   2   8   0 220.897 27.0961   3
   2  -8   0 214.038 30.4427   3
  -2   8   0 192.528 25.6831   3
  -2  -8   0 215.800 28.1451   3
  -2   8  -1 2280.52 77.2764   3
  -2  -8  -1 2322.85 77.8330   3
   2  -8   1 2303.32 76.9909   3
   2   8   1 2216.74 75.5417   3
   2  -8   2 510.622 39.2218   3
  -2  -8  -2 587.810 43.0447   3
  -2   8  -2 583.714 40.4075   3
   2   8   2 517.711 37.9678   3
   2   8   3 5.36752 14.2391   3
  -2   8  -3 9.78570 15.4920   3
  -2  -8  -3 1.68214 19.3597   3
   2  -8   3-4.32741 20.6090   3
   2   8   4 4565.41 104.806   3
  -2   8  -4 4680.19 110.609   3
  -2  -8  -4 4522.12 108.745   3
  -2  -8  -5 567.104 43.1126   3
  -2   8  -5 596.937 42.3208   3
   2   8   5 587.497 40.9372   3
  -2   8  -6 7074.35 140.816   3
   2   8   6 6791.08 136.503   3
   2  -8   6 6482.24 84.8376   1
  -2  -8  -6 6815.81 140.154   3
   2   8   7 4463.70 113.793   3
   2  -8   7 4188.33 64.6178   1
  -2   8  -7 4476.61 115.270   3
  -2  -8  -7 4434.30 114.931   3
   2   8   8 487.341 22.4270   2
   2   8   8 536.829 42.5718   3
  -2  -8  -8 577.933 46.8775   3
   2  -8   8 488.150 21.2548   1
   2   8   9 21655.6 264.171   3
   2   8   9 20689.4 133.846   2
  -2  -8  -9 22152.8 266.094   3
  -2  -8 -10 46.6309 23.4259   3
   2   8  10 38.1228 20.7749   3
  -2  -8 -11 11862.6 206.576   3
   2   8  11 12151.9 210.060   3
  -2  -8 -12 1795.00 84.2127   3
   2   8  12 1823.58 84.7215   3
  -2  -8 -13 1969.91 89.3613   3
   2   8  13 1956.92 90.4656   3
   2   8  14 74.0304 23.6232   3
  -2  -8 -14 52.3883 21.6066   3
   2   8  15 513.611 50.5342   3
  -2  -8 -15 565.497 53.8006   3
   2   8  16 221.967 35.3833   3
  -2  -8 -16 244.538 38.6759   3
  -2  -8 -17 757.946 64.1747   3
  -2  -8 -18-0.07363 24.6266   3
  -2  -8 -19 106.005 30.8938   3
  -2  -8 -20 444.468 55.2792   3
  -2  -8 -21 4587.88 172.754   3
  -2  -8 -22 38.0631 32.2461   3
  -2  -8 -23 2657.66 137.251   3
  -2  -8 -24 49.0114 28.8719   3
  -2   8 -25 250.696 46.8101   3
  -2  -8 -25 217.318 46.7048   3
  -2   8 -26 73.4509 39.2754   3
  -2  -8 -26 110.798 40.4035   3
  -2  -8 -27-1.43948 26.9857   3
  -2   8 -27 43.9363 32.0003   3
  -2   8 -28-2.02721 24.5750   3
  -2  -8 -28-9.06296 25.3832   3
  -2   8 -29-13.0610 25.4482   3
  -2  -8 -29-54.0612 43.6456   3
  -2  -8 -30 137.128 43.1007   3
  -2   8 -30 98.7378 34.1174   3
   2  10 -30-15.6605 32.2604   3
   2 -10 -30-38.1908 34.0641   3
   2 -10 -29-5.81693 28.0035   3
   2  10 -29 15.8133 32.2140   3
   2 -10 -28 80.6960 40.1033   3
   2  10 -28 110.730 43.8252   3
   2 -10 -27 67.7166 37.8749   3
   2 -10 -26 54.1636 34.4739   3
   2 -10 -25-47.0521 30.3157   3
   2 -10 -24 5.74751 32.3112   3
   2 -10 -23 5.70794 28.2683   3
   2  10 -23 104.032 12.3900   1
   2  10 -22 376.610 23.4275   1
   2 -10 -22 321.750 43.5801   3
   2  10 -21-5.53007 9.69522   1
   2 -10 -21-48.8975 38.2320   3
   2  10 -20 56.0391 11.6829   1
   2 -10 -20 9.90636 29.0140   3
   2 -10 -19-37.1769 29.4230   3
   2  10 -19 19.8249 10.8147   1
   2 -10 -18 5509.93 172.698   3
   2  10 -18 5758.04 96.3653   1
   2 -10 -17 101.186 31.3558   3
   2  10 -17 118.851 17.9338   1
  -2  10  16 4288.14 145.702   3
   2 -10 -16 4194.80 146.197   3
   2 -10 -15 28.9875 18.4300   3
  -2  10  15 23.6867 15.4978   3
  -2  10  14 626.652 54.7331   3
   2 -10 -14 616.256 54.1253   3
   2 -10 -13 2.59653 17.9715   3
  -2  10  13 23.7612 18.9400   3
   2 -10 -12 5173.06 143.833   3
  -2  10  12 5192.98 145.341   3
   2 -10 -11 1497.60 78.4059   3
  -2  10  11 1513.28 78.4282   3
   2  10 -10 3408.93 115.144   3
  -2  10  10 3199.48 109.142   3
  -2 -10  10 3085.92 74.0310   1
   2 -10 -10 3222.57 110.613   3
   2 -10  -9 1186.42 67.2889   3
   2  10  -9 1183.87 67.7626   3
  -2 -10   9 1129.31 46.4275   1
  -2  10   9 1169.01 64.6872   3
   2  10  -8 139.535 25.3691   3
  -2  10   8 124.149 24.9021   3
   2 -10  -8 155.411 28.5646   3
  -2 -10   8 93.1104 16.1337   1
   2 -10  -7 8.83326 17.6021   3
  -2 -10   7 27.0344 11.7507   1
  -2  10   7-0.53583 19.1541   3
   2  10  -7 11.3293 15.9959   3
   2  10  -6 47.0884 20.5945   3
  -2  10   6 21.6240 14.5494   3
  -2 -10   6 52.3373 14.6797   1
   2 -10  -6 46.0610 21.0116   3
   2  10  -5 420.266 39.3894   3
  -2  10   5 366.064 35.3087   3
  -2 -10   5 316.315 33.0024   3
  -2 -10   5 383.780 32.2280   1
   2 -10  -5 395.662 37.9546   3
   2 -10  -4 2483.88 89.2532   3
  -2 -10   4 2426.14 86.7335   3
   2  10  -4 2558.55 90.4082   3
  -2 -10   4 2324.22 74.2497   1
  -2  10   4 2393.83 85.8596   3
  -2  10   3 6146.02 134.808   3
   2 -10  -3 6293.67 141.983   3
   2  10  -3 6504.90 142.021   3
  -2 -10   3 6233.80 136.745   3
  -2 -10   2 3232.86 100.260   3
   2  10  -2 3146.66 99.1851   3
   2 -10  -2 3344.70 103.180   3
  -2  10   2 3221.73 99.7146   3
   2  10  -1 94.1417 23.4910   3
   2 -10  -1 111.630 28.1026   3
  -2 -10   1 107.875 25.3789   3
  -2  10   1 91.2367 21.7395   3
   2  10   0 203.357 29.7645   3
  -2 -10   0 229.335 34.7707   3
   2 -10   0 159.919 28.5272   3
  -2  10   0 179.506 28.3605   3
  -2  10  -1 2372.63 85.8384   3
  -2 -10  -1 2385.19 88.4765   3
   2  10   1 2281.06 85.2987   3
   2 -10   1 2300.78 85.6591   3
  -2 -10  -2 1521.88 70.8015   3
  -2  10  -2 1509.41 70.3878   3
   2 -10   2 1515.91 68.1618   3
   2  10   2 1516.76 67.7737   3
   2  10   3 2826.86 91.4776   3
   2 -10   3 2728.93 92.1176   3
  -2 -10  -3 2808.21 95.4783   3
  -2  10  -3 2846.23 95.1285   3
  -2  10  -4 672.649 49.5321   3
   2 -10   4 533.859 42.1802   3
  -2 -10  -4 628.847 48.6870   3
   2  10   4 582.645 43.1853   3
  -2 -10  -5 81.1204 23.1916   3
   2  10   5 78.5107 18.2165   3
  -2  10  -5 75.6641 21.4904   3
   2 -10   6 126.961 18.3992   1
   2  10   6 143.758 23.8141   3
  -2 -10  -6 140.147 25.9640   3
  -2  10  -6 135.284 26.2921   3
  -2  10  -7 646.136 49.3036   3
   2  10   7 669.271 48.5810   3
   2 -10   7 610.095 31.3115   1
  -2 -10  -7 671.744 50.6999   3
  -2 -10  -8 110.489 29.1155   3
   2 -10   8 103.648 13.9049   1
  -2  10  -8 127.433 27.1894   3
   2  10   8 142.069 25.9222   3
   2  10   9 4375.02 126.977   3
  -2  10  -9 4634.77 132.383   3
   2  10   9 4073.70 68.7663   2
   2 -10   9 4181.00 70.3665   1
  -2 -10  -9 4472.95 129.655   3
   2  10  10 2700.48 53.7376   2
  -2 -10 -10 2952.96 107.418   3
   2  10  10 2981.68 109.164   3
   2 -10  10 2722.26 53.1261   1
   2  10  11 712.575 56.1833   3
  -2 -10 -11 618.633 53.4914   3
   2  10  12 3922.63 130.275   3
  -2 -10 -12 3744.56 126.134   3
   2  10  13 4.76328 14.4690   3
  -2 -10 -13 13.8196 21.1423   3
  -2 -10 -14 524.238 53.3841   3
   2  10  14 515.266 50.3758   3
  -2 -10 -15 38.1022 24.2118   3
   2  10  15 90.0128 27.7733   3
  -2 -10 -16 4674.03 156.392   3
  -2 -10 -17 506.568 54.7648   3
  -2 -10 -18 1121.02 81.0661   3
  -2 -10 -19 26.6066 22.9545   3
  -2 -10 -20 134.952 28.4401   3
  -2 -10 -21 67.5754 26.5495   3
  -2 -10 -22 78.9201 24.6241   3
  -2 -10 -23 43.1870 25.3280   3
  -2 -10 -24 62.8476 37.5611   3
  -2 -10 -25 67.6130 33.0802   3
  -2 -10 -26 142.778 44.1336   3
  -2  10 -27 215.103 52.3459   3
  -2 -10 -27 202.719 47.7044   3
  -2  10 -28 38.2572 27.6548   3
  -2 -10 -28-13.8476 29.7229   3
  -2 -10 -29-6.18925 29.5370   3
  -2  10 -29-47.4651 36.9002   3
   2 -12 -29 68.9628 32.6228   3
   2 -12 -28 700.881 82.5152   3
   2 -12 -27-6.22434 34.8834   3
   2 -12 -26 9.96881 25.7512   3
   2 -12 -25 5.70814 24.3303   3
   2 -12 -24 118.248 35.2227   3
   2 -12 -23-19.4718 27.7419   3
   2 -12 -22 24.7967 23.1237   3
   2 -12 -21-63.1511 35.3633   3
   2 -12 -20 5.42919 29.2272   3
   2 -12 -19 154.439 37.7220   3
   2 -12 -18 412.818 51.4546   3
   2 -12 -17 380.774 47.0230   3
   2 -12 -16-25.7623 32.2999   3
   2 -12 -15 359.173 43.6627   3
   2  12 -14 2097.34 104.377   3
   2 -12 -14 1938.99 98.0201   3
  -2  12  14 2107.73 103.318   3
   2 -12 -13 7591.16 190.899   3
   2  12 -13 8083.10 197.601   3
  -2  12  13 7797.20 192.301   3
   2 -12 -12 4356.92 142.277   3
  -2  12  12 4473.61 142.117   3
  -2 -12  12 4160.98 91.0090   1
   2  12 -12 4715.00 148.619   3
  -2 -12  11 5767.99 110.346   1
  -2  12  11 6103.79 162.649   3
   2 -12 -11 6307.65 166.228   3
   2  12 -11 6623.75 173.631   3
  -2  12  10 1124.82 69.2484   3
  -2 -12  10 1063.40 49.3019   1
   2 -12 -10 1074.07 68.4628   3
   2  12 -10 1109.04 70.6797   3
   2  12  -9 514.398 49.4455   3
  -2  12   9 493.488 46.9480   3
   2 -12  -9 493.907 47.2051   3
  -2 -12   9 496.011 34.5813   1
   2 -12  -8 2.57105 22.0485   3
  -2  12   8 26.5873 16.3334   3
   2  12  -8 1.46548 17.6230   3
  -2 -12   8 11.0175 11.6272   1
   2  12  -7-1.46473 18.1435   3
  -2  12   7-6.93068 17.5527   3
  -2 -12   7-11.8526 13.5157   1
   2 -12  -7-32.5582 23.4926   3
  -2 -12   6 433.152 36.5424   1
  -2  12   6 459.359 43.2852   3
   2 -12  -6 420.654 42.9774   3
   2  12  -6 483.855 46.9057   3
   2  12  -5 1448.94 77.1402   3
  -2 -12   5 1303.05 60.2279   1
  -2 -12   5 1377.97 71.1694   3
  -2  12   5 1389.92 72.6663   3
   2 -12  -5 1477.89 77.1701   3
   2  12  -4 39.2141 16.8077   3
  -2  12   4 58.8777 19.9994   3
   2 -12  -4 32.7090 19.8115   3
  -2 -12   4 33.6731 19.3243   3
  -2  12   3 7896.36 167.247   3
   2 -12  -3 8302.39 176.736   3
   2  12  -3 8395.88 178.186   3
  -2 -12   3 7859.47 169.038   3
  -2 -12   2 330.122 40.2563   3
   2  12  -2 303.412 36.7412   3
  -2  12   2 334.890 39.3434   3
   2 -12  -2 312.297 40.2867   3
   2  12  -1 2177.71 89.4765   3
   2 -12  -1 2199.89 92.8295   3
  -2  12   1 2167.87 90.3180   3
  -2 -12   1 2133.10 91.5022   3
  -2  12   0 179.079 32.0577   3
   2  12   0 183.205 31.2085   3
   2 -12   0 175.543 34.8087   3
  -2 -12   0 239.817 38.1259   3
  -2  12  -1 2410.58 94.4742   3
  -2 -12  -1 2287.66 95.0512   3
   2 -12   1 2247.03 95.1364   3
   2  12   1 2321.23 92.6519   3
  -2 -12  -2 1034.36 64.5958   3
   2 -12   2 998.223 61.3548   3
  -2  12  -2 1108.52 65.0821   3
   2  12   2 1020.52 61.4932   3
  -2  12  -3 4615.44 133.110   3
   2  12   3 4433.60 125.609   3
   2 -12   3 4412.15 127.614   3
  -2 -12  -3 4648.69 134.243   3
   2  12   4 48.1691 15.5483   3
   2 -12   4 16.0132 21.5527   3
  -2  12  -4 44.1171 19.1727   3
  -2 -12  -4 38.8675 21.5439   3
   2  12   5 1325.20 70.6108   3
  -2 -12  -5 1353.41 75.6195   3
  -2  12  -5 1322.27 74.8153   3
  -2  12  -6 119.714 25.4303   3
  -2 -12  -6 93.9234 24.1094   3
   2  12   6 63.2912 18.5004   3
  -2 -12  -7 663.660 54.4203   3
   2  12   7 721.122 52.6888   3
   2 -12   7 681.290 38.7398   1
  -2  12  -7 770.730 59.5329   3
   2 -12   8-4.15299 10.6333   1
  -2  12  -8 0.63575 18.1299   3
  -2 -12  -8-12.9594 22.2961   3
   2  12   8 8.63228 14.2926   3
  -2 -12  -9 1429.61 79.3534   3
  -2  12  -9 1571.85 84.8705   3
   2 -12   9 1324.27 47.9067   1
   2  12   9 1448.63 78.1293   3
  -2  12 -10 1503.89 83.9258   3
   2  12  10 1451.01 80.1323   3
   2  12  10 1373.69 43.2684   2
  -2 -12 -10 1405.50 81.4004   3
   2 -12  10 1308.93 45.3482   1
   2  12  11 7001.06 92.3304   2
  -2 -12 -11 7494.01 187.242   3
  -2  12 -11 7895.09 191.132   3
   2 -12  11 7096.18 98.7874   1
   2  12  11 7648.73 185.505   3
  -2 -12 -12 2882.77 118.214   3
   2  12  12 2764.23 52.8360   2
   2  12  12 2985.32 120.358   3
  -2  12 -12 3134.97 124.895   3
  -2  12 -13 3222.60 128.302   3
   2  12  13 3262.55 127.101   3
  -2 -12 -13 3085.86 125.279   3
  -2 -12 -14 18.0730 26.8066   3
  -2 -12 -15-31.7754 29.0448   3
  -2 -12 -16 1072.71 79.4613   3
  -2 -12 -17-13.1865 25.8956   3
  -2 -12 -18 73.5426 26.1995   3
  -2 -12 -19 15.8686 24.2034   3
  -2 -12 -20 259.057 41.7779   3
  -2 -12 -21-14.5671 27.7360   3
  -2 -12 -22 32.1002 26.9619   3
  -2 -12 -23-27.5210 33.9465   3
  -2 -12 -24-18.6754 29.7591   3
  -2 -12 -25 134.833 40.4357   3
  -2 -12 -26 250.092 50.7946   3
  -2 -12 -27 494.841 71.1264   3
  -2 -12 -28 230.689 54.3750   3
   2 -14 -28 474.800 69.5461   3
   2 -14 -27-35.1164 38.1158   3
   2 -14 -26 33.3764 36.3025   3
   2 -14 -25 156.153 37.9205   3
   2 -14 -24 796.813 80.6106   3
   2 -14 -23 480.549 64.6110   3
   2 -14 -22 466.675 65.5129   3
   2 -14 -21 77.9439 35.2589   3
   2 -14 -20 87.6456 37.4853   3
   2 -14 -19 446.627 57.1901   3
   2 -14 -18 57.2804 27.4382   3
   2 -14 -17 140.290 35.4855   3
   2 -14 -16 120.806 30.0890   3
   2 -14 -15 3815.42 149.688   3
   2 -14 -14 616.200 62.0554   3
   2 -14 -13 19336.4 321.024   3
  -2 -14  13 18108.8 203.483   1
   2 -14 -12 102.272 37.1197   3
  -2 -14  12 21.8258 14.2142   1
  -2  14  12 72.0945 29.3114   3
   2  14 -12 75.9946 33.5451   3
  -2  14  11 14998.8 268.655   3
  -2 -14  11 14096.1 188.942   1
   2  14 -11 16084.5 285.165   3
   2 -14 -11 15283.8 278.324   3
  -2  14  10 474.053 50.0158   3
  -2 -14  10 448.204 36.4905   1
   2 -14 -10 477.541 50.1438   3
   2  14 -10 524.588 52.6960   3
   2  14  -9 3131.28 124.642   3
  -2 -14   9 2588.24 85.5061   1
  -2  14   9 2810.01 113.090   3
   2 -14  -9 2873.58 120.520   3
   2 -14  -8 16.4157 21.5851   3
  -2 -14   8 17.2904 13.2311   1
  -2  14   8 12.7378 16.6642   3
   2  14  -8 56.4754 19.1704   3
   2 -14  -7 602.631 56.9049   3
  -2 -14   7 537.358 41.2845   1
   2  14  -7 654.950 57.1780   3
  -2  14   7 622.915 54.0517   3
  -2  14   6 524.971 48.8044   3
   2 -14  -6 545.040 54.2494   3
  -2 -14   6 526.874 50.4534   3
   2  14  -6 595.548 54.6365   3
  -2 -14   6 478.211 40.5404   1
  -2 -14   5 264.079 37.3572   3
  -2  14   5 252.728 37.8090   3
   2 -14  -5 277.207 37.4365   3
   2  14  -5 305.432 40.8418   3
  -2 -14   5 256.756 32.5705   1
  -2 -14   4 1372.79 78.9800   3
  -2  14   4 1462.30 78.7322   3
   2 -14  -4 1537.41 84.8187   3
   2  14  -4 1548.71 83.8809   3
  -2 -14   3 367.213 40.7479   3
  -2  14   3 403.104 43.1857   3
   2 -14  -3 381.029 43.8600   3
   2  14  -3 468.155 48.5991   3
   2 -14  -2 254.831 39.5803   3
  -2 -14   2 270.133 39.4621   3
  -2  14   2 254.402 36.2966   3
   2  14  -2 233.845 35.5141   3
   2 -14  -1 804.187 61.3166   3
  -2 -14   1 713.721 58.2980   3
   2  14  -1 798.046 60.0451   3
  -2  14   1 735.076 58.8163   3
   2  14   0 552.698 52.5210   3
  -2  14   0 583.202 52.8988   3
   2 -14   0 563.210 52.9546   3
  -2 -14   0 518.028 51.3222   3
   2 -14   1 92.5226 24.7931   3
  -2 -14  -1 117.008 30.4091   3
  -2  14  -1 144.681 28.6504   3
   2  14   1 90.3922 24.2094   3
  -2 -14  -2 1208.97 75.1062   3
   2 -14   2 1150.89 71.6071   3
  -2  14  -2 1296.46 77.8033   3
   2  14   2 1044.81 67.5334   3
  -2 -14  -3 27.9452 23.1479   3
  -2  14  -3-1.30114 18.2512   3
   2  14   3 12.8318 18.0377   3
   2 -14   3 15.7083 21.3185   3
   2 -14   4 2410.60 102.480   3
   2  14   4 2398.49 102.496   3
  -2 -14  -4 2523.02 109.326   3
  -2  14  -4 2731.27 111.804   3
  -2 -14  -5-12.2036 20.2917   3
   2  14   5 17.7741 20.6562   3
  -2  14  -5-3.58180 18.3477   3
  -2  14  -6 1043.30 72.0098   3
   2  14   6 981.837 67.8432   3
  -2 -14  -6 931.081 68.4636   3
  -2 -14  -7 22.3552 21.4532   3
  -2  14  -7 31.1318 19.0691   3
   2  14   7 18.6109 16.4880   3
   2 -14   7 43.1152 15.9756   1
  -2 -14  -8 548.717 53.8689   3
  -2  14  -8 614.373 58.9910   3
   2  14   8 614.372 54.0812   3
   2 -14   8 485.923 34.6570   1
  -2 -14  -9 7298.70 191.111   3
   2  14   9 7255.27 187.267   3
  -2  14  -9 7953.62 201.339   3
   2 -14   9 6578.69 122.075   1
   2 -14  10 1202.54 51.9081   1
  -2 -14 -10 1398.90 86.9638   3
   2  14  10 1342.20 83.1893   3
  -2  14 -10 1402.10 89.5136   3
  -2  14 -11 29076.7 393.867   3
   2 -14  11 26167.8 220.312   1
   2  14  11 27123.0 370.438   3
   2  14  11 25793.3 198.481   2
  -2 -14 -11 27460.3 373.557   3
   2 -14  12 251.912 23.2062   1
   2  14  12 244.369 20.7770   2
  -2 -14 -12 379.572 51.9919   3
  -2 -14 -13 13348.6 271.613   3
   2  14  13 12589.9 117.736   2
  -2 -14 -14 32.9932 24.9008   3
  -2 -14 -15 1229.30 86.4050   3
  -2 -14 -16 24.3240 20.6724   3
  -2 -14 -17 266.856 45.4304   3
  -2 -14 -18 289.944 47.2458   3
  -2 -14 -19 377.589 56.5145   3
  -2 -14 -20 159.205 42.8421   3
  -2 -14 -21-21.2305 25.2005   3
  -2 -14 -22 165.125 42.7622   3
  -2 -14 -23 63.6445 25.9044   3
  -2 -14 -24 172.011 43.6261   3
  -2 -14 -25-42.3498 38.3709   3
  -2 -14 -26 212.242 47.6764   3
  -2 -14 -27-32.7907 28.5240   3
   2 -16 -27 167.077 47.7317   3
   2 -16 -26 155.574 47.8653   3
   2 -16 -25 3816.45 185.244   3
   2 -16 -24 695.809 84.6107   3
   2 -16 -23 7355.44 246.586   3
   2 -16 -22 310.609 61.3392   3
   2 -16 -21 2239.03 135.245   3
   2 -16 -20 231.735 48.6133   3
   2 -16 -19 58.0123 29.1009   3
   2 -16 -18 52.2994 26.8068   3
   2 -16 -17 17.9772 22.1613   3
   2 -16 -16 1.49564 22.0760   3
   2 -16 -15 1306.17 92.5735   3
  -2  16  14 78.8450 8.15812   2
  -2 -16  14 91.6827 17.1925   1
   2 -16 -14 103.181 32.2680   3
   2 -16 -13 4875.68 173.424   3
  -2 -16  13 4357.34 110.070   1
  -2 -16  12 1576.95 68.0736   1
   2 -16 -12 1796.83 105.357   3
   2 -16 -11 1052.86 80.3333   3
  -2 -16  11 959.296 54.5376   1
  -2 -16  10 619.618 45.3182   1
   2 -16 -10 699.476 65.2943   3
   2 -16  -9 313.395 48.5030   3
   2  16  -9 291.526 43.3823   3
  -2  16   9 228.717 31.8723   3
  -2 -16   9 263.222 31.5659   1
   2 -16  -8 120.489 30.3119   3
  -2 -16   8 133.283 23.5345   1
   2  16  -8 162.177 36.3495   3
  -2  16   8 111.515 26.2900   3
   2 -16  -7-6.52832 22.7131   3
  -2 -16   7-4.67022 14.2976   1
   2  16  -7-2.59373 19.2517   3
  -2  16   7 6.87517 16.2090   3
  -2 -16   6 1111.96 64.6909   1
  -2  16   6 1047.14 73.5708   3
   2  16  -6 1236.84 81.9899   3
   2 -16  -6 1238.92 84.1249   3
  -2 -16   6 1111.09 76.2106   3
   2  16  -5 340.524 45.9634   3
  -2 -16   5 309.356 44.0602   3
  -2  16   5 355.773 45.0473   3
  -2 -16   5 256.837 35.6234   1
   2 -16  -5 288.236 44.4474   3
   2 -16  -4 256.060 41.3874   3
  -2  16   4 225.569 35.9366   3
  -2 -16   4 219.638 39.0791   3
   2  16  -4 292.719 42.3116   3
   2  16  -3-4.78832 17.4973   3
  -2 -16   3 15.9095 21.3003   3
  -2  16   3 15.3114 17.0595   3
   2 -16  -3-25.8526 26.6476   3
  -2 -16   2-0.55714 21.4729   3
   2  16  -2 8.80395 20.1731   3
  -2  16   2 20.7979 21.3951   3
   2 -16  -2-41.4403 26.3304   3
  -2 -16   1 97.2034 27.4012   3
  -2  16   1 82.2596 23.7575   3
   2 -16  -1 49.9208 20.8797   3
   2  16  -1 87.3218 27.3547   3
   2 -16   0-21.9052 23.5981   3
   2  16   0-42.6089 27.9437   3
  -2 -16   0-1.36749 20.1330   3
  -2  16   0-8.08194 24.1823   3
  -2  16  -1 13.5963 17.6876   3
   2  16   1-13.0881 17.8631   3
  -2 -16  -1-34.9569 26.6714   3
   2 -16   1-24.4188 24.4145   3
  -2  16  -2 366.288 45.4958   3
   2 -16   2 310.895 42.3186   3
  -2 -16  -2 330.530 45.5348   3
   2  16   2 360.211 43.6348   3
  -2  16  -3 699.698 62.9673   3
   2 -16   3 665.628 60.4459   3
   2  16   3 612.097 54.9292   3
  -2 -16  -3 623.485 59.1580   3
  -2 -16  -4 2410.68 114.581   3
   2 -16   4 2237.59 105.784   3
   2  16   4 2292.24 106.845   3
  -2  16  -4 2520.09 115.616   3
   2 -16   5 469.544 51.0932   3
  -2  16  -5 524.923 56.8021   3
  -2 -16  -5 569.299 59.5013   3
   2  16   5 464.870 49.8126   3
   2  16   6 1318.50 81.4501   3
  -2 -16  -6 1454.11 91.8596   3
  -2  16  -6 1586.16 93.5705   3
   2  16   7 2.44262 23.9164   3
  -2 -16  -7 70.0236 28.6895   3
  -2  16  -7 22.7324 20.4122   3
   2 -16   7 38.1449 16.8513   1
  -2 -16  -8 575.918 62.1485   3
   2  16   8 421.145 46.1525   3
   2 -16   8 439.443 37.2319   1
  -2 -16  -9 80.6015 27.9172   3
   2 -16   9 136.298 22.2197   1
   2 -16  10 5790.20 122.425   1
  -2 -16 -10 6356.35 195.235   3
   2 -16  11 2601.55 78.8758   1
  -2 -16 -11 2889.18 132.122   3
   2 -16  12 5207.17 106.712   1
  -2 -16 -12 5705.43 186.816   3
   2  16  12 5305.11 95.9090   2
   2  16  13 1739.37 50.8430   2
  -2 -16 -13 1885.59 109.507   3
   2 -16  13 1753.99 58.7702   1
   2  16  14 506.337 24.5351   2
  -2 -16 -14 489.872 58.0034   3
  -2 -16 -15-1.03596 22.4698   3
  -2 -16 -16-74.4378 33.8677   3
  -2 -16 -17-58.0711 33.9684   3
  -2 -16 -18 90.6513 35.8673   3
  -2 -16 -19 429.180 64.2575   3
  -2 -16 -20 286.457 62.9378   3
  -2 -16 -21 3372.60 165.863   3
  -2 -16 -22 212.767 52.6267   3
  -2 -16 -23 3445.98 173.447   3
  -2 -16 -24 623.616 79.9876   3
  -2 -16 -25 742.679 85.8088   3
  -2 -16 -26 157.523 50.0331   3
   2 -18 -26 16.8477 30.1154   3
   2 -18 -25 2697.86 164.080   3
   2 -18 -24 685.831 89.9247   3
   2 -18 -23 5963.97 232.467   3
   2 -18 -22 1208.65 105.844   3
   2 -18 -21 2226.84 139.280   3
   2 -18 -20 31.9270 27.9491   3
   2 -18 -19 126.804 36.0323   3
   2 -18 -18-16.3149 34.4180   3
   2 -18 -17-24.2844 28.9969   3
   2 -18 -16-61.2491 34.4494   3
  -2  18  15 4.02176 4.14500   2
   2 -18 -15-0.66032 23.8462   3
  -2 -18  15-23.4215 15.5301   1
  -2 -18  14 216.995 26.7952   1
   2 -18 -14 282.453 51.6117   3
  -2 -18  13 102.538 21.1634   1
   2 -18 -13 175.322 43.4773   3
  -2 -18  12 60.6501 20.6776   1
   2 -18 -12 32.8215 24.9432   3
  -2 -18  11 105.220 17.0749   1
   2 -18 -11 229.805 46.5595   3
   2 -18 -10 1164.48 88.6203   3
  -2 -18  10 1002.48 61.1519   1
  -2 -18   9 1026.43 64.3627   1
   2 -18  -9 1373.08 96.2381   3
   2 -18  -8 3741.74 152.646   3
  -2 -18   8 3294.87 114.908   1
   2 -18  -7 159.518 39.6916   3
  -2 -18   7 193.583 33.1266   1
   2 -18  -6 1960.48 111.585   3
  -2 -18   6 1678.17 84.7641   1
  -2 -18   6 1768.97 102.815   3
  -2 -18   5-15.3489 26.4738   3
   2 -18  -5 46.4031 28.7931   3
  -2 -18   5 57.5769 27.8083   1
   2 -18  -4 53.5220 24.3933   3
  -2 -18   4 46.8761 26.7749   3
  -2 -18   3-8.52978 24.0707   3
   2 -18  -3 11.7795 21.1782   3
  -2 -18   2 1377.73 90.1130   3
   2 -18  -2 1369.24 91.2534   3
   2 -18  -1 102.029 30.2458   3
  -2 -18   1 97.0670 30.6577   3
  -2 -18   0 636.127 63.9764   3
   2 -18   0 668.342 65.5324   3
  -2 -18  -1 868.259 74.2816   3
   2 -18   1 826.272 70.9020   3
   2 -18   2 107.508 30.5000   3
  -2 -18  -2 54.0802 25.1572   3
  -2 -18  -3-8.76292 32.8852   3
   2 -18   3-45.5719 27.6074   3
   2 -18   4 551.456 58.4582   3
  -2 -18  -4 572.333 60.1831   3
   2 -18   5 468.883 55.0339   3
  -2 -18  -5 460.392 56.5166   3
  -2 -18  -6 1216.63 88.2018   3
  -2 -18  -7 106.712 37.3951   3
   2 -18   7 82.0145 22.4070   1
   2 -18   8 15.3712 13.8852   1
  -2 -18  -8 29.9870 31.8748   3
  -2 -18  -9 1036.67 86.3544   3
   2 -18   9 845.689 54.1426   1
   2 -18  10 1021.54 57.3789   1
  -2 -18 -10 1247.49 93.5012   3
  -2 -18 -11 436.036 59.6436   3
   2 -18  11 348.370 34.3319   1
  -2 -18 -12 672.002 73.8033   3
   2 -18  12 615.963 42.2053   1
  -2 -18 -13 235.037 45.9864   3
   2 -18  13 179.244 23.6582   1
   2  18  13 214.367 21.7459   2
  -2 -18 -14-4.37310 28.0391   3
   2  18  14-0.49309 8.35064   2
   2 -18  14-6.29202 10.0483   1
  -2 -18 -15-7.82747 31.9648   3
  -2 -18 -16-22.1799 31.7688   3
  -2 -18 -17 46.0348 26.3757   3
  -2 -18 -18 23.3907 24.5887   3
  -2 -18 -19 112.178 38.0557   3
  -2 -18 -20 1365.08 110.746   3
  -2 -18 -21 2931.48 160.692   3
  -2 -18 -22 1323.33 113.456   3
  -2 -18 -23 4300.79 201.866   3
  -2 -18 -24 162.668 50.9736   3
  -2 -18 -25 1286.52 115.776   3
   2 -20 -24 407.655 68.0122   3
   2 -20 -23 233.411 54.2842   3
   2 -20 -22 657.514 81.6390   3
   2 -20 -21-18.4223 42.8417   3
   2 -20 -20-11.0978 34.4125   3
   2 -20 -19-20.6322 36.2979   3
   2 -20 -18 1174.36 101.449   3
   2 -20 -17-54.7596 36.4318   3
   2 -20 -16 346.628 58.7117   3
  -2 -20  15 1.46105 14.4815   1
   2 -20 -15-53.2851 39.6479   3
   2 -20 -14-31.1401 31.1252   3
  -2 -20  14-11.0037 17.3819   1
  -2 -20  13 6.01757 14.3808   1
   2 -20 -13-33.8674 28.7193   3
   2 -20 -12 116.279 38.9564   3
  -2 -20  12 104.041 24.7016   1
   2 -20 -11 118.400 41.9942   3
  -2 -20  11 14.4547 18.2918   1
   2 -20 -10 687.314 75.3694   3
  -2 -20  10 624.242 52.7373   1
  -2 -20   9 38.3660 19.8330   1
   2 -20  -9 108.436 35.7728   3
  -2 -20   8 1513.50 83.6867   1
   2 -20  -8 1691.31 109.158   3
  -2 -20   7 93.6217 27.1259   1
   2 -20  -7-11.8115 32.9097   3
  -2 -20   6 349.575 44.3109   1
  -2 -20   6 275.296 39.0296   3
   2 -20  -6 284.363 42.8066   3
  -2 -20   5 205.064 37.9001   3
  -2 -20   5 332.961 44.4013   1
   2 -20  -5 226.935 41.3854   3
   2 -20  -4 1050.97 85.9688   3
  -2 -20   4 1100.98 77.8074   1
  -2 -20   4 917.373 78.5706   3
   2 -20  -3 1810.90 111.291   3
  -2 -20   3 1752.33 106.440   3
   2 -20  -2 2925.84 139.362   3
  -2 -20   2 2951.67 137.610   3
   2 -20  -1 165.959 41.8400   3
  -2 -20   1 162.955 39.5799   3
   2 -20   0 2544.51 130.254   3
  -2 -20   0 2459.95 128.738   3
  -2 -20  -1 1579.19 103.280   3
   2 -20   1 1668.29 104.035   3
   2 -20   2 195.574 38.9630   3
  -2 -20  -2 206.417 40.6316   3
   2 -20   3 597.972 62.7836   3
  -2 -20  -3 617.677 66.6405   3
   2 -20   4-41.5263 33.0331   3
  -2 -20  -4-98.3283 39.4633   3
   2 -20   5-62.5298 39.7227   3
  -2 -20  -5-51.4708 37.6950   3
   2 -20   6 74.5067 25.9918   1
  -2 -20  -6-36.5174 35.6424   3
   2 -20   7 51.2488 22.1954   1
  -2 -20  -7 52.0586 30.3468   3
   2 -20   8 183.946 29.9142   1
  -2 -20  -8 254.663 50.2221   3
   2 -20   9 589.630 49.7105   1
  -2 -20  -9 763.072 80.9527   3
  -2 -20 -10 538.462 69.5040   3
   2 -20  10 392.524 40.0927   1
  -2 -20 -11 304.267 53.7286   3
   2 -20  11 198.447 27.4400   1
  -2 -20 -12-61.0796 33.8359   3
   2 -20  12 1.92479 15.5395   1
  -2 -20 -13-22.8876 35.0163   3
   2 -20  13-0.87988 14.1272   1
  -2 -20 -14-59.9468 39.6708   3
  -2 -20 -15-25.9610 34.1035   3
  -2 -20 -16 788.741 83.0223   3
  -2 -20 -17 129.159 30.0524   3
  -2 -20 -18 726.432 82.0184   3
  -2 -20 -19 56.9837 28.4711   3
  -2 -20 -20 287.351 55.0487   3
  -2 -20 -21 73.0251 36.6120   3
  -2 -20 -22 869.854 94.0852   3
  -2 -20 -23 267.593 56.3554   3
   2 -22 -22 74.8304 39.9005   3
   2 -22 -21-86.4188 47.3535   3
   2 -22 -20-82.5248 46.6617   3
   2 -22 -19 56.8256 40.3787   3
   2 -22 -18 295.477 57.8518   3
   2 -22 -17 356.059 63.2927   3
   2 -22 -16 11.0178 31.1767   3
   2 -22 -15 10.2238 30.0198   3
   2 -22 -14 359.470 59.3400   3
  -2 -22  13 112.345 27.3937   1
   2 -22 -13 92.6108 37.0608   3
  -2 -22  12 152.747 28.7221   1
   2 -22 -12 212.000 49.3998   3
   2 -22 -11 24.5733 32.9981   3
  -2 -22  11-22.3508 21.6986   1
  -2 -22  10 162.930 31.2957   1
   2 -22 -10 228.440 49.0522   3
  -2 -22   9 54.4878 21.5168   1
   2 -22  -9 91.1140 36.4552   3
   2 -22  -8 149.174 35.6737   3
  -2 -22   8 167.071 34.1397   1
  -2 -22   7 58.4857 24.9978   1
   2 -22  -7-14.8611 35.5344   3
  -2 -22   6-77.6267 47.8394   3
   2 -22  -6-49.8813 37.4115   3
   2 -22  -5 576.858 69.7401   3
  -2 -22   5 348.630 45.8884   3
   2 -22  -4 83.9108 39.3414   3
  -2 -22   4-26.9032 37.5453   3
   2 -22  -3 2714.16 143.132   3
  -2 -22   3 2630.72 136.492   3
   2 -22  -2 568.006 68.9517   3
  -2 -22   2 573.127 69.0356   3
   2 -22  -1 1361.62 102.815   3
  -2 -22   1 1435.30 103.472   3
   2 -22   0 2106.32 125.218   3
  -2 -22   0 2240.69 129.809   3
  -2 -22  -1 325.877 60.3443   3
   2 -22   1 361.031 55.6989   3
   2 -22   2 1457.22 101.383   3
  -2 -22  -2 1645.59 112.253   3
  -2 -22  -3 1326.99 100.814   3
   2 -22   3 1136.47 90.5444   3
  -2 -22  -4 46.0347 32.2382   3
   2 -22   4-48.4100 38.9585   3
  -2 -22  -5 919.214 84.2994   3
   2 -22   5 715.647 70.2985   3
   2 -22   6 172.771 36.0146   1
  -2 -22  -6 69.4842 29.3639   3
   2 -22   7 1065.56 72.4388   1
  -2 -22  -7 1224.62 99.7986   3
  -2 -22  -8 382.680 58.7136   3
   2 -22   8 331.569 41.3915   1
  -2 -22  -9 355.521 61.9702   3
   2 -22   9 252.759 37.4070   1
   2 -22  10 284.018 37.6538   1
  -2 -22 -10 369.546 60.8500   3
  -2 -22 -11 167.041 49.2455   3
   2 -22  11 86.0291 20.2535   1
  -2 -22 -12 34.6241 35.5261   3
  -2 -22 -13 735.154 84.3791   3
  -2 -22 -14 21.5821 28.9267   3
  -2 -22 -15 108.393 37.9974   3
  -2 -22 -16 229.890 48.2511   3
  -2 -22 -17-51.0954 47.3499   3
  -2 -22 -18 395.860 64.7448   3
  -2 -22 -19-82.5915 44.0324   3
  -2 -22 -20 53.0770 34.1543   3
  -2 -22 -21 3.01492 31.0973   3
   2 -24 -19-2.10484 41.6675   3
   2 -24 -18-18.6477 44.1068   3
   2 -24 -17 198.145 50.8683   3
   2 -24 -16 436.466 73.5407   3
   2 -24 -15 1435.99 124.423   3
   2 -24 -14 570.143 83.7767   3
   2 -24 -13 2270.65 147.671   3
   2 -24 -12 186.448 52.1728   3
   2 -24 -11 893.143 92.9650   3
   2 -24 -10 25.4779 33.1639   3
   2 -24  -9 391.607 62.4051   3
   2 -24  -8 9.80398 29.3131   3
   2 -24  -7 391.743 62.6215   3
   2 -24  -6 128.813 42.0872   3
  -2 -24   6 105.099 36.0391   3
  -2 -24   5 7.82662 24.9919   3
   2 -24  -5 22.8733 31.7772   3
   2 -24  -4-23.3030 32.9126   3
  -2 -24   4 3.63921 29.1959   3
  -2 -24   3 582.578 70.6229   3
   2 -24  -3 712.829 82.3572   3
   2 -24  -2 116.415 39.9562   3
  -2 -24   2 135.002 42.7841   3
  -2 -24   1 998.402 93.0411   3
   2 -24  -1 1071.08 95.5449   3
   2 -24   0 265.822 51.3161   3
  -2 -24   0 410.938 62.3648   3
   2 -24   1 130.945 45.5519   3
  -2 -24  -1 207.545 52.4902   3
  -2 -24  -2 1138.55 99.0077   3
   2 -24   2 1035.52 93.9366   3
  -2 -24  -3-6.82344 27.5072   3
   2 -24   3-16.3160 28.0015   3
   2 -24   4 353.153 56.1155   3
  -2 -24  -4 498.531 69.7056   3
  -2 -24  -5 74.1504 35.3522   3
  -2 -24  -6 7.63694 28.2815   3
  -2 -24  -7 91.9098 38.9104   3
  -2 -24  -8 149.727 48.8088   3
  -2 -24  -9 102.499 38.6385   3
  -2 -24 -10 638.540 82.3379   3
  -2 -24 -11 2623.09 158.886   3
  -2 -24 -12 403.339 73.6623   3
  -2 -24 -13 4063.72 197.861   3
  -2 -24 -14 62.0849 37.7699   3
  -2 -24 -15 1294.38 116.090   3
  -2 -24 -16-35.8698 46.0110   3
  -2 -24 -17-2.22667 39.4885   3
  -2 -24 -18-23.6094 44.1459   3
   2 -26 -16-10.3848 34.0611   3
   2 -26 -15 1044.99 109.325   3
   2 -26 -14 30.2924 36.7735   3
   2 -26 -13 1630.50 134.664   3
   2 -26 -12 41.5709 41.3023   3
   2 -26 -11 306.267 66.7832   3
   2 -26 -10-82.0564 46.1670   3
   2 -26  -9-70.2072 43.4167   3
   2 -26  -8-63.2793 48.8123   3
   2 -26  -7-73.1531 42.2492   3
   2 -26  -6 182.402 47.9562   3
   2 -26  -5-11.0078 33.2633   3
  -2 -26   5 19.5615 28.4254   3
   2 -26  -4 38.9588 33.9654   3
  -2 -26   4 63.0504 39.3673   3
   2 -26  -3 23.3241 27.2354   3
  -2 -26   3 16.5070 31.4447   3
  -2 -26   2-1.19159 27.8960   3
   2 -26  -2-47.3908 33.0819   3
  -2 -26   1-14.9983 30.2038   3
   2 -26  -1 8.52268 26.8264   3
  -2 -26   0 0.76589 28.9911   3
   2 -26   0-45.0088 38.2055   3
  -2 -26  -1 32.5721 33.2120   3
   2 -26   1 16.7867 27.2339   3
   2 -26   2 114.048 43.2344   3
  -2 -26  -2 50.0450 40.7412   3
  -2 -26  -3 190.669 50.4288   3
   2 -26   3 164.158 47.9455   3
  -2 -26  -4 47.1669 31.5511   3
   2 -26   4 91.9379 41.2050   3
  -2 -26  -5 128.493 45.5606   3
  -2 -26  -6 70.8917 29.8737   3
  -2 -26  -7 4.61132 31.7340   3
  -2 -26  -8-13.2738 38.3443   3
  -2 -26  -9 136.747 46.0485   3
  -2 -26 -10 1824.07 137.149   3
  -2 -26 -11 672.005 90.7037   3
  -2 -26 -12 3082.32 181.781   3
  -2 -26 -13 790.828 97.6232   3
  -2 -26 -14 1006.36 106.031   3
  -2 -26 -15 130.745 47.0126   3
   2 -28 -12 24.3452 37.2335   3
   2 -28 -11 108.923 44.5562   3
   2 -28 -10 422.860 75.5224   3
   2 -28  -9-9.91080 32.4203   3
   2 -28  -8 754.725 91.3282   3
   2 -28  -7 148.916 50.9172   3
   2 -28  -6 148.833 49.1620   3
   2 -28  -5 13.0336 27.8407   3
  -2 -28   5 24.6886 27.5186   3
   2 -28  -4 11.9242 38.4144   3
  -2 -28   4 62.3407 39.1960   3
   2 -28  -3 28.0003 36.9230   3
  -2 -28   3 46.8554 31.3175   3
   2 -28  -2 136.631 48.6623   3
  -2 -28   2 124.128 42.7239   3
  -2 -28   1 273.417 55.3352   3
   2 -28  -1 228.324 55.5517   3
  -2 -28   0 207.815 50.4280   3
   2 -28   0 252.066 59.0570   3
  -2 -28  -1 154.694 45.9624   3
   2 -28   1 130.081 49.2254   3
   2 -28   2 3.10960 37.7701   3
  -2 -28  -2 32.5449 33.3332   3
  -2 -28  -3-19.1771 33.1458   3
   2 -28   3-5.91556 39.9888   3
   2 -28   4 36.8057 34.1576   3
  -2 -28  -4 15.5019 34.9870   3
  -2 -28  -5 423.462 70.7531   3
  -2 -28  -6 83.3961 39.6336   3
  -2 -28  -7 415.469 70.8765   3
  -2 -28  -8-74.2545 50.2838   3
  -2 -28  -9 82.8713 45.0101   3
  -2 -28 -10 743.228 94.6128   3
  -2 -28 -11 50.0946 41.7674   3
  -2 -30   4-3.65254 35.9000   3
   2 -30  -4 20.6430 32.5848   3
  -2 -30   3-90.5914 44.6413   3
   2 -30  -3-23.3193 40.5434   3
  -2 -30   2 1145.08 111.898   3
   2 -30  -2 1102.63 109.806   3
  -2 -30   1-10.9207 32.2125   3
   2 -30  -1 28.2138 31.1150   3
   2 -30   0 1457.58 128.786   3
  -2 -30   0 1337.71 121.244   3
  -2 -30  -1 45.8257 39.5664   3
   2 -30   1 25.4870 29.3656   3
  -2 -30  -2 348.663 66.4977   3
   2 -30   2 340.140 64.4038   3
   2 -30   3-35.7098 42.7457   3
  -2 -30  -3-12.8985 39.7231   3
   3   1 -32 1987.73 138.864   3
   3  -1 -32 2226.62 146.294   3
   3   1 -31 295.151 55.1565   3
   3  -1 -31 368.264 63.9221   3
   3   1 -30 112.639 39.9973   3
   3  -1 -30 136.174 40.8128   3
   3  -1 -29 37.4155 34.3666   3
   3   1 -29 11.9661 28.5095   3
   3   1 -28 992.667 89.0346   3
   3  -1 -28 949.182 89.4981   3
   3  -1 -27 4.41874 22.9325   3
   3   1 -27 13.1824 24.5843   3
   3  -1 -26 169.625 39.8317   3
   3   1 -26 152.551 35.3537   3
   3   1 -25 25.5755 24.2178   3
   3  -1 -25-0.38728 21.0945   3
   3  -1 -24 272.218 44.5498   3
   3   1 -24 220.605 38.8124   3
   3   1 -23 1.53365 22.8146   3
   3  -1 -23-40.6117 28.8118   3
   3  -1 -22 840.664 69.4363   3
   3   1 -22 930.087 73.5748   3
   3  -1 -21 94.5426 23.4064   3
   3   1 -21 113.099 29.4889   3
   3   1 -20 15.7918 19.7660   3
   3  -1 -20-31.7716 21.1531   3
   3   1 -19 296.578 43.1832   3
   3  -1 -19 282.115 38.9602   3
   3   1 -18 1755.96 90.5697   3
   3  -1 -18 1782.90 90.0415   3
   3  -1 -17 3.75352 17.3045   3
   3   1 -17 45.2731 24.6280   3
   3   1 -16 1215.75 70.6626   3
   3  -1 -16 1203.93 70.8727   3
   3   1 -15 271.700 34.4948   3
   3  -1 -15 272.162 35.1877   3
   3  -1 -14 218.375 30.8105   3
   3   1 -14 214.138 31.0875   3
   3  -1 -13 1421.19 67.2576   3
   3   1 -13 1432.97 67.2227   3
   3  -1 -12 371.390 35.7769   3
   3   1 -12 420.563 38.4548   3
   3   1 -11 1470.82 62.9653   3
   3  -1 -11 1343.73 59.6839   3
   3  -1 -10 175.860 25.7155   3
   3  -1  -9 954.158 46.3963   3
  -3   1   8 272.845 24.9613   3
   3  -1  -8 239.841 25.2276   3
   3  -1  -7 0.94948 14.0628   3
  -3   1   7-1.56935 11.2328   3
  -3   1   6-10.5414 11.2298   3
   3  -1  -6 16.7409 12.6713   3
   3  -1  -5-6.04610 10.7808   3
  -3   1   5 15.5787 10.1237   3
  -3   1   4 126.604 12.5911   3
   3  -1  -4 112.411 11.9591   3
   3  -1  -3 17.0764 6.77498   3
  -3   1   3 19.3674 6.64201   3
   3   1  -2 17.1636 6.07628   1
  -3  -1   0 219.927 12.6038   1
  -3  -1  -1 43.7505 7.59384   2
  -3  -1  -1 49.4616 9.65143   1
   3   1   1 42.8289 7.36351   2
  -3  -1  -1 38.3889 6.55615   3
  -3  -1  -2 1873.10 37.0473   3
   3   1   2 1837.92 37.1046   3
  -3  -1  -2 1828.70 35.5064   2
  -3  -1  -3 16.4903 11.0209   3
   3   1   3 23.3857 9.41914   3
  -3  -1  -4 23.4692 12.6099   3
   3   1   4 26.2881 10.9489   3
  -3  -1  -5 163.390 20.0024   3
   3   1   5 158.621 18.2398   3
   3   1   6 2062.49 62.2719   3
  -3  -1  -6 2039.11 60.2834   3
  -3  -1  -7 1.07090 18.2318   3
  -3  -1  -8 28.9464 17.5738   3
  -3  -1  -9 235.717 28.6947   3
  -3   1  -9-66.7402 55.8782   3
  -3   1 -10 4582.68 114.905   3
  -3  -1 -10 4622.32 110.943   3
  -3   1 -11 212.597 30.2330   3
  -3  -1 -11 211.977 30.4120   3
  -3   1 -12 2914.75 97.5938   3
  -3  -1 -12 2875.04 95.9524   3
  -3  -1 -13 47.6670 21.2956   3
  -3   1 -13 33.6229 18.8053   3
  -3   1 -14 229.627 32.7745   3
  -3  -1 -14 233.350 32.9975   3
  -3  -1 -15 1259.40 72.1176   3
  -3   1 -15 1246.85 71.5477   3
  -3   1 -16 1191.90 72.7260   3
  -3  -1 -16 1240.53 73.9532   3
  -3   1 -17 1022.76 70.3917   3
  -3  -1 -17 1098.78 72.2060   3
  -3  -1 -18 91.1363 26.6194   3
  -3   1 -18 77.6159 25.9721   3
  -3   1 -19 9.10046 22.5522   3
  -3  -1 -19 22.6841 18.4704   3
  -3   1 -20 121.925 29.9185   3
  -3  -1 -20 136.747 31.0166   3
  -3   1 -21 84.6579 27.1101   3
  -3  -1 -21 57.7064 20.3660   3
  -3   1 -22 2.24071 21.0667   3
  -3  -1 -22-1.51556 23.8987   3
  -3  -1 -23-13.9749 22.8985   3
  -3   1 -23 17.8054 22.9191   3
  -3  -1 -24 99.2823 30.7381   3
  -3   1 -24 62.3074 25.0031   3
  -3  -1 -25 249.823 46.6663   3
  -3   1 -25 283.353 49.2562   3
  -3  -1 -26 32.9673 30.0308   3
  -3   1 -26 71.2897 31.1679   3
  -3  -1 -27 471.149 63.5284   3
  -3   1 -27 446.199 61.4309   3
  -3  -1 -28-30.8447 31.4028   3
  -3   1 -28-14.4549 32.4678   3
  -3   1 -29 206.796 51.8005   3
  -3  -1 -29 233.189 52.3765   3
  -3  -1 -30 1268.57 111.649   3
  -3   1 -30 1132.21 104.987   3
  -3   1 -31 192.005 53.5282   3
  -3  -1 -31 144.319 52.5139   3
   3  -3 -32 201.364 57.1682   3
   3   3 -32 195.095 54.1417   3
   3   3 -31 588.549 75.7070   3
   3  -3 -31 451.443 67.6001   3
   3  -3 -30 151.128 40.8144   3
   3   3 -30 181.168 45.6800   3
   3  -3 -29 151.059 42.3353   3
   3   3 -29 80.7677 29.9452   3
   3  -3 -28 498.536 67.2775   3
   3   3 -28 466.108 63.9227   3
   3  -3 -27 55.0521 29.6583   3
   3   3 -27 93.3634 34.7793   3
   3   3 -26 6.18065 23.8831   3
   3  -3 -26 5.24323 21.9097   3
   3  -3 -25-26.4507 29.5173   3
   3   3 -25 38.9670 27.6080   3
   3   3 -24 88.6235 33.3571   3
   3  -3 -24 96.6138 35.0659   3
   3  -3 -23 196.814 39.4208   3
   3   3 -23 217.357 43.3027   3
   3   3 -22 743.860 68.7946   3
   3  -3 -22 721.179 66.5562   3
   3  -3 -21 1345.63 87.0995   3
   3   3 -21 1384.37 87.5337   3
   3   3 -20 321.572 44.4916   3
   3  -3 -20 301.049 43.3523   3
   3  -3 -19 349.883 46.1254   3
   3   3 -19 449.531 50.9612   3
   3   3 -18 807.407 63.0828   3
   3  -3 -18 727.049 57.8311   3
   3   3 -17 42.6762 30.3378   3
   3  -3 -17 20.2418 17.7541   3
   3  -3 -16 27.3387 16.6027   3
   3  -3 -15 821.131 56.6388   3
   3  -3 -14 149.527 27.0823   3
  -3   3  14 157.345 28.3537   3
  -3   3  13 2744.95 95.4723   3
   3  -3 -13 2781.88 93.7376   3
  -3   3  12 296.514 32.3430   3
   3  -3 -12 286.709 32.8855   3
   3  -3 -11 2614.47 83.4476   3
  -3   3  11 2620.97 82.9498   3
  -3   3  10 214.301 25.3650   3
   3  -3 -10 221.354 27.6389   3
  -3   3   9 542.603 37.3985   3
   3  -3  -9 557.485 39.1907   3
   3  -3  -8 129.687 22.1851   3
  -3   3   8 157.099 20.8767   3
  -3   3   7 935.598 40.5688   3
   3  -3  -7 926.841 41.5462   3
  -3   3   6 0.36696 10.9987   3
   3  -3  -6-2.88934 13.9591   3
   3   3  -6 0.27530 9.09185   1
  -3   3   5 273.453 21.7528   3
   3   3  -5 274.110 18.5146   1
   3  -3  -5 279.705 22.9329   3
  -3  -3   4 3.82980 9.02210   1
   3  -3  -4 26.8514 12.5993   3
  -3   3   4 21.1203 10.3658   3
   3   3  -4 5.37389 9.93801   1
   3   3  -3 91.2211 12.6456   3
   3  -3  -3 109.248 13.8065   3
   3   3  -3 91.9889 12.0893   1
  -3  -3   3 106.679 13.1692   1
  -3   3   3 85.3429 11.6556   3
   3   3  -2 1005.59 31.5266   1
   3   3  -2 994.446 31.4965   3
  -3  -3   2 948.744 31.0055   1
  -3   3   2 943.622 29.7177   3
  -3  -3   2 930.307 30.5591   3
   3  -3  -2 969.861 31.9340   3
  -3   3   1 41.1281 10.5657   3
   3   3  -1 39.0894 9.69000   3
  -3  -3   1 45.4529 12.0273   1
  -3  -3   1 44.1069 11.3975   3
   3  -3  -1 29.3487 10.1861   3
   3   3  -1 77.3738 14.1074   1
  -3  -3   0 18.6008 9.63783   3
   3  -3   0 17.3651 8.98157   3
   3   3   0 21.1748 8.82340   3
  -3   3   0 14.8439 8.26075   3
  -3  -3  -1 40.6961 10.8744   3
   3   3   1 31.1543 8.80226   3
  -3   3  -1 41.3645 10.2643   3
   3   3   2 59.3946 11.9946   3
  -3  -3  -2 34.7657 12.0596   3
   3   3   3 54.0239 12.2242   3
   3   3   3 53.6426 9.88115   2
  -3  -3  -3 57.2564 14.6688   3
  -3  -3  -4 1099.80 42.1785   3
   3   3   4 1120.32 41.0569   3
   3   3   4 1141.16 30.5078   2
  -3  -3  -4 1103.32 30.3686   2
   3   3   5 1345.56 48.6078   3
  -3  -3  -5 1362.52 33.7572   2
  -3  -3  -5 1376.30 48.8729   3
   3   3   6 82.2394 16.8955   3
  -3  -3  -6 102.994 19.5509   3
  -3  -3  -6 98.7006 12.0630   2
  -3  -3  -7 519.541 36.2771   3
  -3  -3  -7 510.437 23.2318   2
   3   3   7 518.563 35.2359   3
  -3  -3  -8 17.8711 17.6709   3
  -3  -3  -8 10.7011 9.33556   2
   3   3   8-0.75829 12.8380   3
  -3  -3  -9 1266.82 59.4268   3
   3   3   9 1274.46 58.1434   3
   3   3  10 681.833 45.0347   3
  -3  -3 -10 622.114 43.3532   3
   3   3  11 5530.64 130.043   3
  -3  -3 -11 5298.31 125.545   3
   3   3  12 2620.87 95.6489   3
  -3  -3 -12 2647.31 93.7735   3
  -3  -3 -13 1753.68 81.5460   3
  -3  -3 -14 93.8494 25.4923   3
  -3  -3 -15 216.582 32.9802   3
  -3   3 -16 358.347 41.8910   3
  -3  -3 -16 263.624 35.1862   3
  -3   3 -17 155.642 33.7164   3
  -3  -3 -17 82.1432 21.2614   3
  -3  -3 -18 74.3624 26.4126   3
  -3   3 -18 111.085 31.6893   3
  -3   3 -19 880.461 69.6750   3
  -3  -3 -19 781.250 66.2880   3
  -3   3 -20 1907.14 105.254   3
  -3  -3 -20 1827.51 102.049   3
  -3  -3 -21 2063.54 110.833   3
  -3   3 -21 2271.25 116.333   3
  -3   3 -22 3210.79 140.937   3
  -3  -3 -22 3166.25 143.742   3
  -3  -3 -23 543.088 63.3083   3
  -3   3 -23 584.638 67.4865   3
  -3  -3 -24 285.760 46.9333   3
  -3   3 -24 342.555 54.5626   3
  -3  -3 -25 23.4595 25.9245   3
  -3   3 -25-1.75003 25.0959   3
  -3  -3 -26 119.347 38.8109   3
  -3  -3 -26 86.8354 21.2564   2
  -3   3 -26 87.3527 33.2133   3
  -3  -3 -27 158.255 40.4521   3
  -3   3 -27 123.125 38.8285   3
  -3   3 -28 7.45813 26.7583   3
  -3  -3 -28 61.6628 30.8502   3
  -3   3 -29-58.1786 39.0645   3
  -3  -3 -29 29.0118 30.5481   3
  -3   3 -30 607.372 79.1365   3
  -3  -3 -30 600.641 78.6245   3
   3   5 -32-14.3797 28.7053   3
   3  -5 -32 101.130 41.4839   3
   3  -5 -31 92.1286 40.0148   3
   3   5 -31 87.6232 38.4909   3
   3   5 -30 89.5534 36.0339   3
   3  -5 -30 51.6491 32.6518   3
   3  -5 -29 19.9103 25.2438   3
   3   5 -29 37.2097 30.4831   3
   3   5 -28 2.23056 24.1008   3
   3  -5 -28-31.4915 33.0881   3
   3  -5 -27 11.8293 23.9279   3
   3   5 -27 11.0171 25.0139   3
   3  -5 -26 5.07615 8.97043   2
   3   5 -26 23.9035 27.0960   3
   3  -5 -26 67.1720 33.0002   3
   3  -5 -25-15.0598 12.8944   2
   3   5 -25 136.026 43.1583   3
   3  -5 -25 109.185 42.8032   3
   3   5 -24 168.657 50.6979   3
   3  -5 -24 168.966 43.4597   3
   3  -5 -23 783.367 76.4087   3
   3   5 -23 796.332 79.0104   3
   3  -5 -22 1481.49 95.3566   3
   3   5 -22 1416.66 95.0698   3
   3   5 -21 1202.69 73.1901   3
   3  -5 -21 1499.86 93.2096   3
   3  -5 -20 425.779 51.5944   3
   3  -5 -19 280.700 41.2530   3
   3  -5 -18 7.06697 17.1274   3
  -3   5  18 0.70208 16.1536   3
  -3   5  17 124.194 27.8756   3
   3  -5 -17 142.560 30.8583   3
  -3   5  16 440.120 44.9048   3
   3  -5 -16 400.152 41.6563   3
  -3   5  15 983.529 62.3799   3
   3  -5 -15 945.199 62.0368   3
  -3   5  14 8.18554 16.2597   3
   3  -5 -14-3.97737 21.0671   3
   3   5 -13 1046.11 40.6051   1
   3  -5 -13 915.078 56.8630   3
  -3   5  13 1039.67 59.0999   3
  -3   5  12 1798.52 75.0203   3
   3   5 -12 1762.02 50.8646   1
   3  -5 -12 1743.26 73.7748   3
  -3   5  11 325.040 32.6695   3
   3  -5 -11 314.797 32.2609   3
   3   5 -11 322.409 22.1949   1
   3   5 -10 1836.47 49.3144   1
   3  -5 -10 1783.77 70.7377   3
  -3   5  10 1862.35 70.2192   3
  -3   5   9-8.20827 13.6148   3
   3   5  -9 9.49851 9.97854   1
   3  -5  -9-14.5628 18.1658   3
  -3   5   8 480.448 35.1473   3
   3   5  -8 481.876 25.7731   1
   3  -5  -8 496.062 36.3537   3
  -3   5   7 831.522 41.2711   3
   3   5  -7 810.856 32.3924   1
   3  -5  -7 809.798 43.3087   3
   3  -5  -6 1839.34 60.2714   3
  -3  -5   6 1838.98 47.6149   1
   3   5  -6 1860.57 48.5535   1
  -3   5   6 1876.06 59.3757   3
  -3   5   5 2645.48 67.6988   3
   3  -5  -5 2677.94 68.9049   3
   3   5  -5 2734.78 59.0010   1
   3   5  -5 2698.01 69.7004   3
  -3  -5   5 2654.08 57.8450   1
  -3  -5   4 292.885 21.9362   1
   3  -5  -4 299.945 25.0967   3
  -3   5   4 250.352 22.4568   3
   3   5  -4 300.073 25.3701   3
   3   5  -4 327.297 24.5142   1
  -3  -5   3 4.36944 14.4276   3
  -3  -5   3 15.1192 13.2511   1
   3   5  -3 13.1528 13.6446   3
  -3   5   3 22.5725 13.2721   3
   3  -5  -3 6.98090 15.3970   3
  -3  -5   2 51.9107 16.0877   3
   3   5  -2 38.9742 14.9130   3
  -3  -5   2 74.2611 17.1505   1
  -3   5   2 25.3785 12.4016   3
   3  -5  -2 34.1417 15.8761   3
  -3   5   1 21.4643 14.3054   3
   3  -5  -1 0.49374 14.9110   3
   3   5  -1 16.9243 12.2316   3
  -3  -5   1 6.61746 15.0015   3
   3  -5   0 99.1447 18.6401   3
   3   5   0 80.2868 15.2935   3
  -3  -5   0 101.716 18.8573   3
  -3   5   0 96.3378 16.3603   3
  -3  -5  -1 2.06323 14.8719   3
   3  -5   1-6.55498 14.6053   3
  -3   5  -1-26.4097 14.8389   3
   3   5   1-11.0691 12.3940   3
  -3  -5  -2 54.7611 16.5120   3
   3   5   2 28.4337 12.9755   3
  -3   5  -2 59.7298 15.7616   3
   3   5   3 718.729 36.7945   3
  -3  -5  -3 716.063 36.5013   3
  -3   5  -3 717.923 36.8316   3
   3   5   4 2781.60 70.1886   3
  -3  -5  -4 2879.13 72.8351   3
  -3  -5  -5 2268.39 69.1971   3
   3   5   5 2320.71 67.4115   3
   3   5   5 2239.59 45.0432   2
   3   5   6 138.567 20.9480   3
  -3  -5  -6 143.470 24.8039   3
   3   5   6 128.220 12.9506   2
  -3  -5  -7 0.14164 19.9079   3
   3   5   7 5.88179 13.6712   3
   3   5   8 19.0504 13.3840   3
  -3  -5  -8 6.21775 17.5332   3
   3   5   9 400.021 35.1067   3
  -3  -5  -9 385.326 35.1564   3
  -3  -5  -9 386.326 20.2211   2
   3   5  10 7.72917 14.1639   3
  -3  -5 -10-9.56935 21.0119   3
  -3  -5 -10-10.2759 8.10371   2
  -3  -5 -11 517.004 42.0777   3
   3   5  11 554.062 43.5898   3
  -3  -5 -11 542.547 25.2538   2
  -3  -5 -12 45.6721 20.8227   3
   3   5  12 49.6563 19.9773   3
  -3  -5 -12 38.8810 9.88735   2
   3   5  13 1232.40 68.8517   3
  -3   5 -13 1126.47 24.6789   1
  -3  -5 -13 1089.38 66.0942   3
  -3  -5 -13 1148.05 38.6960   2
  -3  -5 -14 283.818 20.4176   2
  -3  -5 -14 278.056 37.4020   3
   3   5  14 244.090 32.4377   3
  -3  -5 -15 108.205 26.0068   3
   3   5  15 97.9048 20.8199   3
  -3  -5 -15 112.915 14.0946   2
  -3  -5 -16 62.3189 12.2762   2
   3   5  16 57.6256 20.4247   3
  -3  -5 -16 53.5271 21.8135   3
  -3  -5 -17 107.824 29.5713   3
  -3  -5 -17 101.541 15.0912   2
  -3  -5 -18 962.973 41.8975   2
  -3  -5 -18 983.326 73.4704   3
  -3  -5 -19 146.753 19.6762   2
  -3  -5 -19 155.404 40.6263   3
  -3  -5 -20 15092.4 171.219   2
  -3   5 -20 14255.2 285.273   3
  -3  -5 -20 15212.8 292.145   3
  -3  -5 -21 459.153 65.9566   3
  -3   5 -21 438.870 68.8420   3
  -3  -5 -21 214.429 27.2975   2
  -3   5 -22 21908.0 373.005   3
  -3  -5 -22 21878.1 370.306   3
  -3  -5 -22 21363.9 213.563   2
  -3  -5 -23 242.506 30.9493   2
  -3   5 -23 337.572 61.9336   3
  -3  -5 -23 412.065 61.8571   3
  -3  -5 -24 5384.66 195.061   3
  -3   5 -24 5310.47 191.363   3
  -3  -5 -24 4984.03 107.039   2
  -3   5 -25 73.5052 34.0291   3
  -3  -5 -25 59.4569 34.7765   3
  -3  -5 -25 65.1260 19.1794   2
  -3  -5 -26 342.072 57.8275   3
  -3   5 -26 407.688 61.0512   3
  -3  -5 -27-48.3842 34.8132   3
  -3   5 -27 5.09178 26.2197   3
  -3  -5 -28 846.635 86.7238   3
  -3   5 -28 853.400 88.2072   3
  -3   5 -29 112.631 41.2739   3
  -3  -5 -29 73.1857 35.9768   3
  -3   5 -30 88.9769 36.5072   3
  -3  -5 -30 78.7149 39.5009   3
   3   7 -31 5.83226 25.7112   3
   3  -7 -31-27.2696 32.5013   3
   3  -7 -30 25.2463 28.0359   3
   3   7 -30-17.0609 26.3868   3
   3   7 -29 54.0718 33.1196   3
   3  -7 -29 14.2033 28.5024   3
   3  -7 -28 58.3543 28.4627   3
   3   7 -28 77.5163 35.4117   3
   3   7 -27 318.755 53.7992   3
   3  -7 -27 365.722 57.9468   3
   3   7 -26 46.6677 29.7905   3
   3  -7 -26 14.8103 25.5708   3
   3   7 -26-12.2934 12.5203   1
   3  -7 -25 98.5004 39.6609   3
   3   7 -25 92.6293 38.8086   3
   3   7 -25 86.1440 17.5654   1
   3  -7 -24 58.2659 37.9726   3
   3   7 -24 14.3493 13.4299   1
   3  -7 -23 360.278 57.0339   3
   3   7 -23 235.447 25.6473   1
   3   7 -22 314.675 28.1469   1
   3  -7 -22 375.692 55.4216   3
   3  -7 -21 124.035 35.6468   3
   3   7 -21 80.1290 16.3638   1
   3   7 -20 44.0270 11.8534   1
   3  -7 -20-32.3347 25.5509   3
   3  -7 -19 91.6294 28.4689   3
   3   7 -19 66.5087 12.9458   1
  -3   7  18-19.5463 21.7417   3
   3  -7 -18-12.8046 19.5097   3
   3   7 -18 3.43776 8.59751   1
   3   7 -17 86.0678 14.9526   1
  -3   7  17 79.9794 25.4305   3
   3  -7 -17 65.2704 25.7664   3
  -3   7  16 9.81254 16.1911   3
   3   7 -16-2.52713 8.47339   1
   3  -7 -16 38.2702 21.9547   3
   3  -7 -15 76.1124 24.4000   3
  -3   7  15 25.6730 14.3040   3
   3   7 -15 54.8105 13.2353   1
   3   7 -14 1043.16 42.3365   1
  -3   7  14 1005.68 62.7242   3
   3  -7 -14 978.592 62.5303   3
   3   7 -13 1774.74 53.1844   1
   3  -7 -13 1880.15 84.8964   3
  -3   7  13 1876.13 83.3857   3
   3  -7 -12 4875.36 128.476   3
  -3   7  12 5024.22 130.345   3
   3   7 -12 4989.64 88.6155   1
  -3   7  11 2991.54 98.1318   3
   3  -7 -11 2880.15 96.2633   3
   3   7 -11 2833.94 66.5599   1
   3   7 -10 7156.46 103.930   1
  -3   7  10 6949.75 144.558   3
   3  -7 -10 7068.97 143.867   3
   3  -7  -9 1602.40 68.9959   3
   3   7  -9 1705.37 51.7567   1
  -3   7   9 1647.35 68.9473   3
   3  -7  -8 518.815 39.9019   3
  -3  -7   8 501.930 29.0398   1
   3   7  -8 562.431 31.5987   1
  -3   7   8 520.652 39.0878   3
  -3  -7   7 435.544 27.5909   1
   3   7  -7 471.210 37.0858   3
   3  -7  -7 448.806 37.9825   3
   3   7  -7 452.458 28.8163   1
  -3   7   7 479.226 36.0823   3
   3   7  -6 34.3723 17.4133   3
  -3   7   6 20.7602 15.6548   3
   3  -7  -6 34.8617 20.7746   3
  -3  -7   6 31.7444 12.9368   1
   3   7  -5 1305.27 55.1630   3
  -3  -7   5 1229.90 46.3625   1
   3  -7  -5 1302.20 57.5616   3
  -3   7   5 1254.06 54.1865   3
  -3  -7   4 157.058 23.7331   3
   3   7  -4 146.568 21.7535   3
   3  -7  -4 133.863 24.8208   3
  -3  -7   4 166.628 20.6871   1
  -3   7   4 128.490 21.0014   3
  -3  -7   3 461.564 35.1801   3
   3  -7  -3 474.156 37.1936   3
  -3  -7   3 472.632 31.6963   1
   3   7  -3 486.091 34.7135   3
  -3   7   3 467.618 34.0004   3
  -3   7   2 579.955 37.4791   3
  -3  -7   2 610.809 40.2157   3
   3  -7  -2 553.844 38.9593   3
   3   7  -2 561.080 37.5021   3
   3  -7  -1 882.497 45.8962   3
  -3  -7   1 872.063 45.4728   3
   3   7  -1 803.498 43.2085   3
  -3   7   1 821.155 45.3630   3
   3   7   0 101.884 19.6159   3
  -3  -7   0 93.3604 22.4735   3
   3  -7   0 80.7614 20.4446   3
  -3   7   0 78.4987 17.7350   3
  -3   7  -1 42.3749 17.3118   3
   3  -7   1 35.3681 18.7529   3
   3   7   1 13.4737 14.0202   3
  -3  -7  -1 25.5285 19.8505   3
   3  -7   2 332.206 32.2652   3
  -3  -7  -2 363.418 33.7823   3
  -3   7  -2 384.557 31.8752   3
   3   7   2 327.884 29.4319   3
  -3  -7  -3 21.0630 19.7757   3
   3   7   3 26.5916 15.4151   3
  -3   7  -3 22.6696 16.0736   3
   3   7   4 124.708 21.5831   3
  -3   7  -4 151.452 23.4637   3
  -3  -7  -4 135.706 24.2471   3
  -3  -7  -5 212.570 28.9920   3
   3   7   5 226.542 26.3391   3
  -3   7  -5 244.419 29.0718   3
   3  -7   6 693.182 23.4852   1
   3   7   6 710.108 44.2575   3
  -3  -7  -6 739.666 45.8211   3
  -3  -7  -7 2177.47 77.4030   3
   3   7   7 2084.91 46.8680   2
   3   7   7 2103.53 76.3019   3
   3  -7   7 2156.13 35.1547   1
   3   7   8 5112.44 71.6237   2
  -3  -7  -8 5132.56 123.660   3
   3   7   8 5250.65 124.373   3
  -3  -7  -9 5044.67 125.307   3
   3   7   9 5122.35 126.039   3
   3   7  10 6706.73 148.498   3
  -3  -7 -10 6097.93 143.883   3
  -3  -7 -11 2988.75 103.999   3
   3   7  11 2993.67 104.129   3
  -3  -7 -12 1362.93 74.0815   3
   3   7  12 1501.75 76.9496   3
  -3  -7 -13 437.312 45.3187   3
   3   7  13 489.049 46.1093   3
  -3  -7 -14 42.3040 19.8216   3
   3   7  14 48.2021 17.7878   3
   3   7  15-2.98617 15.6464   3
  -3  -7 -15 17.1453 19.6684   3
  -3  -7 -16 10.6845 16.7454   3
   3   7  16 45.0642 22.0093   3
  -3  -7 -17 32.6215 22.0646   3
  -3  -7 -18 62.0136 24.4202   3
  -3  -7 -19 1040.33 78.4718   3
  -3  -7 -20 4928.10 170.636   3
  -3  -7 -21 5502.33 183.194   3
  -3  -7 -22 6460.45 203.490   3
  -3  -7 -23 3909.76 164.398   3
  -3   7 -23 3971.15 167.350   3
  -3  -7 -24 651.570 72.8984   3
  -3   7 -24 628.459 72.5257   3
  -3  -7 -25 45.3101 30.1177   3
  -3   7 -25 67.3497 32.1191   3
  -3   7 -26-5.70730 28.3035   3
  -3  -7 -26-1.70364 31.0054   3
  -3  -7 -27 12.9133 24.0440   3
  -3   7 -27 10.1593 24.4522   3
  -3   7 -28 389.171 63.0020   3
  -3  -7 -28 360.936 61.5276   3
  -3   7 -29 12.5145 30.1355   3
  -3  -7 -29 22.4273 26.1587   3
  -3  -7 -30 56.4154 27.4320   3
  -3   7 -30 29.4381 29.7215   3
   3   9 -31 12.4919 37.2518   3
   3  -9 -31 38.8370 29.3657   3
   3   9 -30-8.03228 37.6412   3
   3  -9 -30 69.9228 32.8288   3
   3  -9 -29-34.4072 31.4474   3
   3   9 -29 29.0571 33.1668   3
   3  -9 -28 515.565 68.2653   3
   3   9 -28 586.070 73.1080   3
   3  -9 -27 153.852 42.1284   3
   3   9 -27 199.896 47.2947   3
   3  -9 -26 63.5560 33.1241   3
   3   9 -25 142.396 18.4254   1
   3  -9 -25 174.133 43.6950   3
   3  -9 -24 4.93289 25.5439   3
   3   9 -24 28.2864 9.97254   1
   3   9 -23 1.06429 8.81905   1
   3  -9 -23-33.2208 28.1664   3
   3   9 -22 20.9186 11.0207   1
   3  -9 -22-30.0682 30.2318   3
   3   9 -21-6.79501 11.1232   1
   3  -9 -21-18.0006 29.6521   3
   3   9 -20 182.012 20.1525   1
   3  -9 -20 178.567 36.1162   3
   3   9 -19 265.290 23.5047   1
   3  -9 -19 210.879 36.9702   3
   3   9 -18 63.8682 13.9568   1
   3  -9 -18 70.1789 25.6277   3
   3   9 -17 3.18832 8.33213   1
  -3   9  17 4.27986 18.1534   3
   3  -9 -17 0.92935 18.0766   3
  -3   9  16 93.1804 25.4406   3
   3   9 -16 96.1483 15.4476   1
   3  -9 -16 93.2523 27.7266   3
   3  -9 -15 120.988 27.9277   3
   3   9 -15 108.397 17.0349   1
  -3   9  15 140.867 30.0712   3
   3  -9 -14 41.4740 21.5001   3
  -3   9  14 48.7965 22.0094   3
   3   9 -14 29.4247 11.8657   1
   3  -9 -13 7883.65 176.551   3
   3   9 -13 8108.20 121.068   1
  -3   9  13 8235.30 180.773   3
  -3   9  12 36.4842 20.4522   3
   3   9 -12 31.3706 13.9702   1
   3  -9 -12 32.2830 22.0292   3
  -3   9  11 11593.6 206.517   3
   3   9 -11 11925.6 145.824   1
   3  -9 -11 11901.7 206.493   3
   3  -9 -10 301.170 37.3095   3
  -3  -9  10 254.585 22.9030   1
  -3   9  10 261.625 32.6825   3
   3  -9  -9 2509.36 91.0336   3
   3   9  -9 2598.45 94.6879   3
  -3  -9   9 2375.75 65.4220   1
  -3   9   9 2442.81 88.8701   3
  -3  -9   8 69.5355 15.0129   1
   3  -9  -8 39.7415 17.8189   3
   3   9  -8 94.5138 25.1108   3
  -3   9   8 69.4612 18.6050   3
   3   9  -7 12.8337 14.5520   3
   3  -9  -7 35.7209 18.0661   3
  -3   9   7 18.8481 15.8080   3
  -3  -9   7 25.6965 11.5624   1
  -3   9   6 8.62889 14.4850   3
   3   9  -6 12.7685 16.2603   3
   3  -9  -6 11.9586 17.8094   3
  -3  -9   6 21.2223 11.7818   1
   3   9  -5 310.682 34.1543   3
  -3  -9   5 282.748 31.7327   3
  -3   9   5 302.357 31.3593   3
  -3  -9   5 260.829 25.8865   1
   3  -9  -5 312.356 35.7754   3
   3  -9  -4 119.636 26.8692   3
   3   9  -4 106.489 23.4982   3
  -3   9   4 78.1979 19.0054   3
  -3  -9   4 93.7301 21.5079   3
  -3  -9   4 103.201 20.2999   1
   3  -9  -3 332.944 35.2045   3
  -3   9   3 338.373 33.8654   3
  -3  -9   3 306.641 33.8953   3
   3   9  -3 356.018 34.2555   3
   3   9  -2 386.535 36.1540   3
  -3  -9   2 381.170 37.7056   3
  -3   9   2 393.133 35.3537   3
   3  -9  -2 413.078 39.2015   3
  -3  -9   1 540.978 43.5680   3
   3  -9  -1 495.646 41.0547   3
  -3   9   1 512.489 40.2868   3
   3   9  -1 514.272 40.3247   3
   3   9   0 75.4336 20.7363   3
  -3   9   0 63.2110 20.4935   3
  -3  -9   0 103.397 26.8895   3
   3  -9   0 50.7395 22.5544   3
  -3  -9  -1 603.691 44.8849   3
   3   9   1 577.538 42.3258   3
  -3   9  -1 567.086 43.7770   3
   3  -9   1 628.615 45.9149   3
  -3  -9  -2-7.25613 19.5957   3
  -3   9  -2 21.6211 16.3776   3
   3   9   2-11.1870 15.6206   3
   3  -9   2-5.64579 18.9348   3
   3   9   3 431.752 36.3590   3
  -3   9  -3 476.440 40.3120   3
  -3  -9  -3 466.131 41.3433   3
   3  -9   3 434.800 38.1041   3
  -3  -9  -4 37.1369 18.5365   3
  -3   9  -4 67.2256 20.5587   3
   3   9   4 91.3714 19.2134   3
   3   9   5-8.55264 15.5854   3
  -3  -9  -5-1.01684 19.0973   3
  -3   9  -5 13.0041 16.5775   3
  -3   9  -6 113.966 23.2656   3
   3   9   6 66.0777 18.7406   3
  -3  -9  -6 85.0083 22.4383   3
   3  -9   7 61.9476 11.0462   1
  -3   9  -7 66.0206 22.6691   3
  -3  -9  -7 82.3252 24.0951   3
   3   9   7 56.7238 19.0413   3
   3  -9   8 10236.8 97.5994   1
  -3   9  -8 10793.3 193.337   3
   3   9   8 10169.1 111.196   2
   3   9   8 10664.9 187.108   3
  -3  -9  -8 10432.7 185.547   3
  -3  -9  -9 107.330 28.1804   3
   3   9   9 88.5065 24.5215   3
   3   9   9 82.5855 12.8582   2
   3  -9   9 70.6267 9.49271   1
  -3  -9 -10 15206.0 238.762   3
   3   9  10 14633.8 126.763   2
   3   9  10 15705.9 244.011   3
   3   9  11 274.194 37.8873   3
  -3  -9 -11 273.658 37.3867   3
   3   9  12 4466.20 135.775   3
  -3  -9 -12 4061.94 131.325   3
  -3  -9 -13 21.3862 21.3365   3
   3   9  13 23.2451 15.6439   3
   3   9  14 7.77156 17.7061   3
  -3  -9 -14 29.2449 21.7460   3
  -3  -9 -15 3.07176 20.1428   3
   3   9  15 1.78707 15.6997   3
  -3  -9 -16 114.514 29.5593   3
  -3  -9 -17 454.229 50.8890   3
  -3  -9 -18 27.5240 23.6149   3
  -3  -9 -19 23.8558 25.5200   3
  -3  -9 -20-10.1314 26.7098   3
  -3  -9 -21 1365.38 95.1714   3
  -3  -9 -22 61.4151 31.5885   3
  -3  -9 -23 232.401 43.9092   3
  -3  -9 -24 439.410 62.0269   3
  -3  -9 -25 846.204 86.1320   3
  -3   9 -25 253.094 33.8681   3
  -3  -9 -26 305.141 57.4327   3
  -3   9 -26 247.237 49.7655   3
  -3   9 -27 499.514 71.2548   3
  -3  -9 -27 491.585 68.4540   3
  -3  -9 -28-14.2856 28.5955   3
  -3   9 -28-5.99159 30.1002   3
  -3   9 -29 31.1348 28.5120   3
  -3  -9 -29 30.7903 26.6417   3
   3 -11 -30-43.3484 40.1993   3
   3  11 -30-43.7274 37.9357   3
   3  11 -29 65.7495 27.6658   3
   3 -11 -29 75.4988 33.8199   3
   3 -11 -28 335.892 59.4785   3
   3 -11 -27 148.376 42.8404   3
   3 -11 -26 45.1618 30.0015   3
   3 -11 -25 288.307 54.0400   3
   3 -11 -24 165.349 40.7670   3
   3 -11 -23-10.9589 34.7440   3
   3 -11 -22-74.0890 39.2597   3
   3 -11 -21-14.1076 32.8939   3
   3 -11 -20-49.9011 35.8497   3
   3 -11 -19-35.1932 27.9888   3
   3 -11 -18 789.457 68.6204   3
   3 -11 -17 539.267 56.2150   3
   3 -11 -16 967.958 71.1608   3
  -3  11  15 161.044 31.7207   3
   3 -11 -15 63.2060 19.7078   3
  -3  11  14 111.133 25.1095   3
   3 -11 -14 69.2245 20.9356   3
  -3  11  13 981.920 66.6231   3
   3 -11 -13 927.812 65.7137   3
   3 -11 -12 2838.23 109.902   3
  -3  11  12 2667.42 106.363   3
   3  11 -12 2885.74 113.968   3
   3  11 -11 1574.59 81.3830   3
  -3 -11  11 1387.51 53.8504   1
  -3  11  11 1483.76 78.2729   3
   3 -11 -11 1437.73 79.0177   3
   3  11 -10 723.498 55.5508   3
  -3 -11  10 669.621 38.8378   1
   3 -11 -10 728.971 56.8808   3
  -3  11  10 650.572 50.7767   3
   3 -11  -9 597.099 48.9428   3
  -3 -11   9 552.808 36.4530   1
  -3  11   9 581.742 47.7116   3
   3  11  -9 611.546 50.5125   3
  -3  11   8-0.16090 16.6275   3
  -3 -11   8 3.57636 13.1729   1
   3 -11  -8 2.92351 18.2872   3
   3  11  -8 10.9357 16.4975   3
  -3 -11   7 868.383 46.2173   1
   3 -11  -7 931.630 60.9948   3
   3  11  -7 996.236 61.9287   3
  -3  11   7 887.638 56.9119   3
   3 -11  -6 271.430 33.0490   3
  -3 -11   6 299.871 29.5624   1
   3  11  -6 310.193 36.3155   3
  -3  11   6 234.872 30.5092   3
  -3 -11   5 426.567 35.8581   1
   3  11  -5 447.783 41.7363   3
  -3 -11   5 433.735 39.8794   3
  -3  11   5 486.947 42.0402   3
   3 -11  -5 433.609 41.8401   3
  -3 -11   4 1822.68 78.6203   3
  -3 -11   4 1760.82 69.0851   1
   3  11  -4 1874.60 82.7039   3
   3 -11  -4 1935.20 83.0016   3
  -3  11   4 1781.63 78.2275   3
  -3 -11   3 3275.45 104.832   3
   3 -11  -3 3461.63 109.386   3
  -3  11   3 3292.55 104.587   3
   3  11  -3 3426.02 109.833   3
   3  11  -2 1019.83 60.6286   3
   3 -11  -2 996.287 63.1282   3
  -3  11   2 1017.83 60.8054   3
  -3 -11   2 965.452 61.6618   3
   3 -11  -1 5798.03 141.192   3
   3  11  -1 5860.17 139.553   3
  -3 -11   1 5788.47 141.850   3
  -3  11   1 5731.48 138.005   3
  -3  11   0 179.770 30.1753   3
  -3 -11   0 188.208 32.8533   3
   3  11   0 181.242 29.6852   3
   3 -11   0 167.640 30.1442   3
  -3  11  -1 587.201 47.1515   3
   3 -11   1 549.470 47.5469   3
   3  11   1 571.589 46.8095   3
  -3 -11  -1 569.125 46.8820   3
   3 -11   2-9.28858 20.8133   3
  -3  11  -2 2.84070 18.4116   3
  -3 -11  -2-20.7706 22.4444   3
   3  11   2 9.03685 15.6022   3
   3  11   3-22.9237 17.7341   3
  -3  11  -3-3.44725 19.7470   3
   3 -11   3 1.13853 21.9124   3
  -3 -11  -3-25.9455 24.1146   3
  -3 -11  -4-46.2344 24.3841   3
   3  11   4-13.0681 19.0181   3
  -3  11  -4-9.94496 18.7210   3
   3 -11   4-9.41707 19.8612   3
  -3 -11  -5 350.676 38.5953   3
   3  11   5 346.374 36.9721   3
  -3  11  -5 364.903 40.1425   3
  -3  11  -6 666.459 52.8083   3
   3  11   6 623.051 46.4303   3
  -3 -11  -6 610.313 49.8893   3
  -3 -11  -7 1222.04 69.7245   3
  -3  11  -7 1243.06 70.8037   3
   3 -11   7 1136.38 43.7916   1
   3  11   7 1201.72 68.7333   3
  -3 -11  -8 129.577 28.4460   3
   3  11   8 112.909 22.4072   3
  -3  11  -8 120.884 27.5345   3
   3 -11   8 94.4164 14.1445   1
   3 -11   9 3700.17 68.8615   1
   3  11   9 3724.42 72.9136   2
  -3  11  -9 4115.58 132.063   3
   3  11   9 3930.76 124.081   3
  -3 -11  -9 3850.88 125.386   3
   3 -11  10 1521.62 41.1997   1
   3  11  10 1604.31 83.1462   3
   3  11  10 1560.15 45.7902   2
  -3  11 -10 1765.72 88.2345   3
  -3 -11 -10 1629.25 84.1767   3
   3  11  11 3008.25 117.394   3
   3  11  11 2736.04 57.3114   2
  -3  11 -11 3046.79 116.678   3
  -3 -11 -11 2818.13 112.606   3
   3  11  12 393.038 43.3263   3
  -3 -11 -12 352.652 42.9016   3
   3  11  13 23.6267 18.4946   3
  -3 -11 -13-6.98769 22.1737   3
  -3 -11 -14 347.880 41.6300   3
   3  11  14 444.665 49.5523   3
  -3 -11 -15 1717.47 96.0440   3
  -3 -11 -16 439.694 52.6073   3
  -3 -11 -17 480.760 53.9165   3
  -3 -11 -18-62.9608 34.5131   3
  -3 -11 -19-15.6378 25.4139   3
  -3 -11 -20-56.8440 38.7845   3
  -3 -11 -21 146.811 33.5504   3
  -3 -11 -22-8.95508 26.3014   3
  -3 -11 -23 13.0984 28.5834   3
  -3 -11 -24 151.747 39.4001   3
  -3 -11 -25 176.019 45.5235   3
  -3 -11 -26 101.108 37.9771   3
  -3 -11 -27 13.0234 24.8336   3
  -3  11 -28 70.3233 38.6714   3
  -3 -11 -28 28.2829 29.9844   3
   3 -13 -29 6.41809 28.7950   3
   3 -13 -28 281.223 52.2922   3
   3 -13 -27 28.8464 26.1597   3
   3 -13 -26 0.40612 27.1702   3
   3 -13 -25-12.4246 32.0976   3
   3 -13 -24 178.113 43.1471   3
   3 -13 -23 175.059 40.7365   3
   3 -13 -22 5.33766 25.9302   3
   3 -13 -21 583.170 68.7479   3
   3 -13 -20 64.7574 30.8023   3
   3 -13 -19 32.3833 24.5840   3
   3 -13 -18 1122.92 84.3568   3
   3 -13 -17-9.85766 27.2512   3
   3 -13 -16 408.940 49.9732   3
   3 -13 -15-0.07383 24.0376   3
   3 -13 -14 1396.62 86.9185   3
  -3  13  13 27.3626 20.4262   3
   3  13 -13 42.2960 25.0722   3
  -3 -13  13-10.5436 14.7053   1
   3 -13 -13-8.08825 21.4993   3
   3  13 -12 3554.75 133.077   3
   3 -13 -12 3209.71 124.578   3
  -3 -13  12 3038.51 85.5695   1
  -3  13  12 3274.30 123.905   3
   3  13 -11 29.7413 19.6425   3
  -3  13  11 17.5919 19.8414   3
  -3 -13  11 18.7307 12.2903   1
   3 -13 -11 18.4646 21.4934   3
   3 -13 -10 469.644 49.0356   3
  -3 -13  10 443.165 35.5258   1
   3  13 -10 469.009 49.7537   3
  -3  13  10 442.112 46.7110   3
   3 -13  -9 464.458 46.7925   3
   3  13  -9 453.479 47.4563   3
  -3  13   9 379.923 40.0308   3
  -3 -13   9 398.530 33.3230   1
  -3 -13   8 460.227 37.7726   1
  -3  13   8 447.567 45.9738   3
   3  13  -8 515.009 51.2614   3
   3 -13  -8 469.430 47.0554   3
  -3 -13   7 123.850 20.6987   1
   3 -13  -7 144.066 31.0085   3
   3  13  -7 154.529 30.2527   3
  -3  13   7 100.883 24.2745   3
   3  13  -6 364.016 41.3362   3
   3 -13  -6 322.007 40.2299   3
  -3 -13   6 304.233 38.5185   3
  -3 -13   6 338.767 33.2691   1
  -3  13   6 311.543 38.4561   3
  -3 -13   5 1234.09 62.4399   1
  -3 -13   5 1295.97 72.7775   3
   3  13  -5 1386.83 76.7661   3
  -3  13   5 1288.19 73.0444   3
   3 -13  -5 1384.54 77.6233   3
   3 -13  -4 972.915 64.8211   3
   3  13  -4 1006.69 66.8159   3
  -3 -13   4 975.862 57.7491   1
  -3  13   4 961.280 61.8552   3
  -3 -13   4 913.225 61.6524   3
   3 -13  -3 32.7507 23.6538   3
   3  13  -3 6.57953 17.2353   3
  -3  13   3 49.9532 21.0431   3
  -3 -13   3 54.2458 20.9846   3
   3 -13  -2 2409.12 101.584   3
  -3 -13   2 2464.65 101.034   3
  -3  13   2 2493.44 101.946   3
   3  13  -2 2417.79 99.6684   3
   3  13  -1 463.258 45.8735   3
   3 -13  -1 483.155 47.7644   3
  -3  13   1 449.598 44.7374   3
  -3 -13   1 445.845 46.5111   3
   3 -13   0 845.927 60.7316   3
  -3 -13   0 800.264 60.2427   3
  -3  13   0 766.561 58.7841   3
   3  13   0 845.709 59.2635   3
  -3  13  -1 397.063 43.1328   3
   3 -13   1 412.846 45.8232   3
   3  13   1 392.507 42.2679   3
  -3 -13  -1 400.972 44.7880   3
   3  13   2 788.482 57.2556   3
   3 -13   2 746.486 56.0615   3
  -3 -13  -2 831.922 60.8928   3
  -3  13  -2 878.692 60.8552   3
   3 -13   3 80.3054 22.2171   3
  -3 -13  -3 35.7256 18.9270   3
  -3  13  -3 58.4158 24.1043   3
   3  13   3 60.1529 20.2086   3
  -3 -13  -4 759.242 59.8368   3
   3 -13   4 695.613 54.8005   3
   3  13   4 754.028 55.5007   3
  -3  13  -4 750.150 57.9077   3
   3  13   5 333.989 38.3688   3
  -3 -13  -5 331.830 41.0064   3
  -3  13  -5 378.956 43.2575   3
  -3 -13  -6 657.034 56.5587   3
   3  13   6 617.759 51.8714   3
  -3  13  -6 690.954 56.5543   3
   3 -13   7 47.9633 16.0488   1
  -3 -13  -7 17.3790 20.1625   3
   3  13   7 9.34622 15.4338   3
  -3  13  -7 30.4936 19.6844   3
   3  13   8 1331.90 77.8652   3
  -3  13  -8 1578.76 87.2355   3
   3 -13   8 1262.14 51.0871   1
  -3 -13  -8 1326.08 79.6422   3
   3 -13   9 580.768 33.7452   1
   3  13   9 575.569 51.9691   3
  -3  13  -9 664.403 58.1849   3
  -3 -13  -9 582.914 54.6130   3
  -3  13 -10 1146.74 76.2453   3
   3 -13  10 958.579 40.0134   1
   3  13  10 1016.89 41.8158   2
   3  13  10 1083.26 72.6854   3
  -3 -13 -10 1017.67 74.0059   3
  -3 -13 -11 2692.52 117.292   3
   3  13  11 2618.64 63.0076   2
   3 -13  11 2600.50 61.0888   1
   3  13  11 2792.34 117.155   3
  -3  13 -11 2989.68 123.227   3
  -3 -13 -12 587.866 58.2209   3
   3  13  12 589.146 56.7964   3
   3  13  12 515.260 26.3063   2
  -3  13 -12 570.586 56.9852   3
  -3 -13 -13 304.898 42.4334   3
  -3 -13 -14-3.18866 20.7909   3
  -3 -13 -15 1166.12 84.4302   3
  -3 -13 -16-4.23303 23.2684   3
  -3 -13 -17 424.950 54.1903   3
  -3 -13 -18 7.76525 27.2300   3
  -3 -13 -19 14.4333 24.5071   3
  -3 -13 -20 197.326 43.1017   3
  -3 -13 -21-30.1830 31.2923   3
  -3 -13 -22 53.2506 24.7929   3
  -3 -13 -23-40.5129 36.3271   3
  -3 -13 -24-39.2009 32.6501   3
  -3 -13 -25 13.9043 28.0436   3
  -3 -13 -26 369.270 63.9683   3
  -3 -13 -27 69.1738 31.0180   3
   3 -15 -28 23.8103 28.3109   3
   3 -15 -27 46.8970 32.4282   3
   3 -15 -26 32.3634 32.2698   3
   3 -15 -25 15.4446 26.5009   3
   3 -15 -24 188.693 47.1617   3
   3 -15 -23 1930.31 125.157   3
   3 -15 -22 133.605 43.8208   3
   3 -15 -21 2699.16 143.847   3
   3 -15 -20 173.177 43.9403   3
   3 -15 -19 379.941 56.6533   3
   3 -15 -18 93.9952 30.9090   3
   3 -15 -17 79.6268 29.8690   3
   3 -15 -16 237.579 44.1474   3
   3 -15 -15 1311.07 91.4000   3
   3 -15 -14 3317.66 139.576   3
  -3 -15  14 3088.16 89.7894   1
  -3 -15  13 1275.30 59.7561   1
   3 -15 -13 1428.87 91.7981   3
   3 -15 -12 3274.57 135.192   3
  -3 -15  12 3081.13 93.5584   1
  -3  15  11 564.093 55.0927   3
  -3 -15  11 574.249 43.0644   1
   3  15 -11 714.372 64.7901   3
   3 -15 -11 563.122 57.8237   3
  -3 -15  10 87.8177 18.8589   1
   3 -15 -10 6.55703 27.7549   3
   3  15 -10 79.8536 26.1922   3
  -3  15  10 41.7238 18.6137   3
   3  15  -9-20.3656 24.0441   3
  -3  15   9-24.3694 25.0293   3
  -3 -15   9-3.10794 13.5421   1
   3 -15  -9 0.92680 22.3986   3
   3  15  -8 220.360 37.0820   3
   3 -15  -8 249.469 40.4439   3
  -3  15   8 195.121 32.3156   3
  -3 -15   8 179.955 27.9226   1
  -3  15   7 1402.18 81.5747   3
   3  15  -7 1597.47 91.1481   3
  -3 -15   7 1300.23 67.1419   1
   3 -15  -7 1434.40 86.0684   3
  -3 -15   6 2241.88 90.1351   1
   3  15  -6 2695.04 115.340   3
   3 -15  -6 2675.47 115.521   3
  -3  15   6 2392.15 106.912   3
  -3 -15   6 2344.80 104.949   3
   3  15  -5 3053.37 123.551   3
  -3 -15   5 2630.34 96.4228   1
   3 -15  -5 2908.34 119.856   3
  -3 -15   5 2694.81 111.687   3
  -3  15   5 2748.30 113.339   3
  -3 -15   4 1857.72 94.8224   3
   3 -15  -4 1979.32 100.091   3
  -3  15   4 1913.59 93.4855   3
   3  15  -4 2100.22 101.037   3
  -3 -15   4 1820.91 82.8225   1
  -3  15   3 536.478 51.8938   3
  -3 -15   3 455.110 49.0714   3
   3 -15  -3 478.439 49.7561   3
   3  15  -3 506.489 51.5283   3
  -3 -15   2 314.094 41.1292   3
   3 -15  -2 310.709 40.7789   3
   3  15  -2 328.212 43.3750   3
  -3  15   2 367.934 44.9809   3
  -3 -15   1-8.87086 24.3690   3
  -3  15   1-12.7735 19.4072   3
   3 -15  -1 0.65559 22.5386   3
   3  15  -1-25.6102 22.4182   3
  -3 -15   0-26.2279 24.0251   3
  -3  15   0-16.5606 22.4739   3
   3  15   0-22.1351 20.1440   3
   3 -15   0-3.85608 23.6681   3
  -3 -15  -1 303.891 44.6813   3
   3 -15   1 241.406 36.8425   3
  -3  15  -1 334.402 42.7456   3
   3  15   1 281.234 39.5902   3
   3  15   2 1269.29 75.4430   3
   3 -15   2 1228.57 77.1319   3
  -3  15  -2 1410.34 82.8785   3
  -3 -15  -2 1354.70 83.3351   3
   3  15   3 1430.84 81.2115   3
   3 -15   3 1432.08 84.2726   3
  -3  15  -3 1605.07 91.2482   3
  -3 -15  -3 1553.51 88.5510   3
  -3 -15  -4 1546.26 89.4248   3
   3 -15   4 1472.41 84.8913   3
  -3  15  -4 1702.10 92.2294   3
   3  15   4 1403.36 81.9912   3
   3  15   5 2026.28 96.9398   3
  -3  15  -5 2149.20 104.334   3
  -3 -15  -5 2054.82 103.954   3
  -3  15  -6 53.8382 24.0115   3
  -3 -15  -6 51.7268 24.1636   3
   3  15   6 48.7927 18.2153   3
  -3 -15  -7 98.5401 28.1457   3
  -3  15  -7 89.1661 21.9926   3
   3 -15   7 77.3561 18.9253   1
   3  15   7 96.9168 26.1090   3
   3  15   8 122.790 27.9124   3
   3 -15   8 153.662 22.8123   1
  -3  15  -8 184.040 34.6411   3
  -3 -15  -8 124.198 28.1614   3
   3  15   9 627.373 58.8907   3
   3 -15   9 490.121 35.7381   1
  -3  15  -9 596.790 59.5478   3
  -3 -15  -9 591.033 56.9521   3
  -3 -15 -10 1324.09 87.1869   3
   3 -15  10 1201.08 52.2194   1
   3 -15  11 413.829 29.0661   1
  -3 -15 -11 507.033 56.6484   3
   3  15  11 468.132 30.9640   2
   3 -15  12 1758.68 55.6776   1
  -3 -15 -12 1912.04 108.222   3
   3  15  12 1746.83 54.2602   2
   3  15  13 983.703 37.4170   2
  -3 -15 -13 1015.62 80.9015   3
  -3 -15 -14 837.745 74.5705   3
  -3 -15 -15 137.388 33.8656   3
  -3 -15 -16-3.59726 25.2919   3
  -3 -15 -17 72.9148 27.5639   3
  -3 -15 -18 969.465 86.6186   3
  -3 -15 -19 346.125 58.9340   3
  -3 -15 -20 4254.37 180.320   3
  -3 -15 -21 227.742 54.6154   3
  -3 -15 -22 2711.15 149.506   3
  -3 -15 -23 409.978 65.1583   3
  -3 -15 -24 852.221 91.8609   3
  -3 -15 -25 56.0494 33.6228   3
  -3 -15 -26 181.943 47.8397   3
   3 -17 -27 50.9955 34.6026   3
   3 -17 -26 208.034 52.6726   3
   3 -17 -25 114.789 46.3215   3
   3 -17 -24 920.185 94.8822   3
   3 -17 -23 1095.49 100.677   3
   3 -17 -22 769.216 86.1058   3
   3 -17 -21 2120.74 132.653   3
   3 -17 -20 19.6497 28.6824   3
   3 -17 -19 593.558 69.3840   3
   3 -17 -18-31.2079 31.0547   3
   3 -17 -17 590.212 67.9843   3
   3 -17 -16-4.79127 27.6320   3
   3 -17 -15 1026.74 86.0604   3
   3 -17 -14 3.35943 25.2285   3
  -3 -17  14-21.1308 17.8564   1
   3 -17 -13 506.687 66.0919   3
  -3 -17  13 409.963 37.8674   1
  -3 -17  12 340.848 34.7929   1
   3 -17 -12 419.673 55.2217   3
  -3 -17  11 180.355 27.5448   1
   3 -17 -11 273.855 46.0263   3
  -3 -17  10 2027.30 85.3564   1
   3 -17 -10 2388.67 121.219   3
   3 -17  -9 1426.81 94.0423   3
  -3 -17   9 1236.90 68.2505   1
   3 -17  -8 988.587 79.2955   3
  -3 -17   8 923.518 60.5650   1
   3 -17  -7 976.423 78.5482   3
  -3 -17   7 900.308 61.5055   1
  -3 -17   6 222.405 37.8469   1
  -3 -17   6 211.784 37.7518   3
  -3  17   6 219.795 38.5604   3
   3 -17  -6 227.001 39.9609   3
   3  17  -6 261.036 42.6346   3
  -3 -17   5 949.661 64.4701   1
  -3  17   5 890.743 70.0353   3
   3 -17  -5 1007.06 77.2164   3
   3  17  -5 1021.51 76.8258   3
  -3 -17   5 950.550 72.1895   3
  -3 -17   4 181.063 32.5683   3
  -3  17   4 202.635 36.3286   3
   3  17  -4 216.962 36.1625   3
  -3 -17   4 221.817 35.6334   1
   3 -17  -4 248.618 42.3910   3
   3  17  -3 70.6280 26.4525   3
   3 -17  -3 77.5946 27.9029   3
  -3 -17   3 84.2202 26.0657   3
  -3  17   3 81.2728 27.3439   3
   3  17  -2 1256.61 82.5553   3
  -3  17   2 1223.46 82.8596   3
   3 -17  -2 1161.05 80.9430   3
  -3 -17   2 1142.92 80.6808   3
  -3 -17   1 506.181 54.9693   3
  -3  17   1 466.799 52.6862   3
   3  17  -1 454.058 53.0288   3
   3 -17  -1 421.600 49.8381   3
   3  17   0 661.853 62.0565   3
  -3  17   0 670.938 61.8040   3
   3 -17   0 621.047 60.8172   3
  -3 -17   0 599.803 60.7216   3
   3 -17   1 236.172 38.6577   3
  -3 -17  -1 261.936 44.1742   3
   3  17   1 248.299 38.8050   3
  -3  17  -1 259.339 41.4231   3
   3  17   2-15.8609 19.9994   3
  -3 -17  -2-11.1903 21.4661   3
  -3  17  -2-2.62297 18.1574   3
   3 -17   2-39.2301 24.3147   3
  -3  17  -3 797.218 69.2472   3
  -3 -17  -3 725.453 66.8390   3
   3 -17   3 780.775 66.8125   3
   3  17   3 695.489 62.7204   3
   3 -17   4 8.72990 21.2234   3
  -3  17  -4 0.88805 18.9599   3
  -3 -17  -4 19.6366 24.6854   3
   3  17   4-0.53148 19.8925   3
   3  17   5 1240.60 80.9438   3
  -3 -17  -5 1388.31 90.4354   3
  -3  17  -5 1417.48 92.1166   3
  -3 -17  -6 140.817 33.0257   3
  -3 -17  -7 477.963 57.5259   3
   3 -17   7 385.065 37.0980   1
   3 -17   8 2101.55 80.4590   1
  -3 -17  -8 2463.88 123.674   3
  -3 -17  -9 3440.54 146.456   3
   3 -17   9 2894.22 91.9470   1
  -3 -17 -10 835.235 76.3593   3
   3 -17  10 688.463 43.8162   1
  -3 -17 -11 818.535 76.3136   3
   3 -17  11 740.036 44.9489   1
   3  17  12 232.754 23.7150   2
   3 -17  12 206.026 23.0014   1
  -3 -17 -12 276.022 48.8374   3
  -3 -17 -13 45.4903 28.9915   3
   3 -17  13 3.45770 10.0466   1
   3  17  13-3.63567 9.16767   2
   3  17  14 654.906 31.9794   2
  -3 -17 -14 721.634 72.6673   3
  -3 -17 -15 21.6427 25.5333   3
  -3 -17 -16 382.184 57.6020   3
  -3 -17 -17 1.59235 25.5230   3
  -3 -17 -18 1684.47 114.690   3
  -3 -17 -19 195.222 48.7943   3
  -3 -17 -20 2643.23 151.631   3
  -3 -17 -21 1758.34 126.697   3
  -3 -17 -22 1391.64 114.963   3
  -3 -17 -23 2211.63 144.898   3
  -3 -17 -24 145.751 48.3628   3
  -3 -17 -25 783.665 92.6110   3
   3 -19 -25 432.720 72.4204   3
   3 -19 -24 295.460 61.5938   3
   3 -19 -23 5.25559 28.8545   3
   3 -19 -22 511.117 71.9077   3
   3 -19 -21 26.2903 31.1161   3
   3 -19 -20-59.1087 42.0127   3
   3 -19 -19-60.5569 35.9564   3
   3 -19 -18-52.0206 37.6143   3
   3 -19 -17 3.31562 31.1763   3
   3 -19 -16 95.2251 34.2857   3
  -3 -19  15 80.8555 20.7894   1
   3 -19 -15 92.7745 33.3590   3
  -3  19  15 87.1783 10.4336   2
  -3 -19  14 50.9283 19.1088   1
   3 -19 -14 65.9841 32.8953   3
   3 -19 -13 2997.94 147.300   3
  -3 -19  13 2589.58 98.6080   1
  -3 -19  12 31.2709 20.7454   1
   3 -19 -12 23.9260 31.5991   3
  -3 -19  11 5941.71 154.924   1
   3 -19 -11 6816.06 216.430   3
  -3 -19  10 373.260 40.9126   1
   3 -19 -10 522.337 66.4967   3
  -3 -19   9 4766.90 142.959   1
   3 -19  -9 5481.64 190.864   3
   3 -19  -8 432.125 56.8278   3
  -3 -19   8 416.317 44.0354   1
   3 -19  -7 1818.73 110.438   3
  -3 -19   7 1629.40 85.7327   1
   3 -19  -6-20.9184 27.7079   3
  -3 -19   6 18.7274 21.7103   1
  -3 -19   6-39.3942 27.5425   3
   3 -19  -5 288.311 45.3301   3
  -3 -19   5 250.824 41.3321   3
  -3 -19   5 305.110 41.4921   1
  -3 -19   4 350.681 44.9640   1
   3 -19  -4 318.719 47.6218   3
  -3 -19   4 314.008 45.5393   3
  -3 -19   3 4.27097 23.4161   3
   3 -19  -3 46.3979 24.6832   3
  -3 -19   2 989.407 79.1524   3
   3 -19  -2 978.328 79.6449   3
  -3 -19   1 590.353 63.9168   3
   3 -19  -1 627.349 66.0262   3
   3 -19   0 30.9143 24.9738   3
  -3 -19   0-21.3583 29.9637   3
   3 -19   1 1071.62 81.0582   3
  -3 -19  -1 1172.99 87.2117   3
   3 -19   2 398.638 52.5396   3
  -3 -19  -2 368.173 50.4550   3
   3 -19   3 473.177 56.9076   3
  -3 -19  -3 470.612 57.0624   3
  -3 -19  -4-39.8043 29.4160   3
   3 -19   4-26.1394 24.6805   3
  -3 -19  -5 22.9202 22.1966   3
   3 -19   5-26.6731 27.7509   3
  -3 -19  -6 961.262 82.1189   3
   3 -19   7 84.3363 22.5143   1
  -3 -19  -7 182.283 45.0870   3
   3 -19   8 8103.70 171.044   1
  -3 -19  -8 9477.37 253.296   3
   3 -19   9 100.580 22.7899   1
  -3 -19  -9 226.130 57.7404   3
  -3 -19 -10 10183.6 266.468   3
   3 -19  10 8945.79 170.648   1
   3 -19  11 17.4386 15.3295   1
  -3 -19 -11 49.1753 35.0538   3
  -3 -19 -12 1494.48 105.993   3
   3 -19  12 1327.31 61.5418   1
   3 -19  13 9.97334 11.5046   1
  -3 -19 -13 8.10533 27.9722   3
   3  19  13-3.31438 10.3339   2
   3 -19  14 20.3596 11.2814   1
  -3 -19 -14-25.4707 29.2213   3
   3  19  14 45.5102 13.2639   2
  -3 -19 -15-27.3470 36.8981   3
  -3 -19 -16 227.709 47.2032   3
  -3 -19 -17-77.0318 36.9200   3
  -3 -19 -18 210.622 46.2129   3
  -3 -19 -19-42.3685 34.9517   3
  -3 -19 -20 146.289 46.9774   3
  -3 -19 -21 434.435 68.3752   3
  -3 -19 -22 298.172 60.2071   3
  -3 -19 -23 291.670 60.6897   3
   3 -21 -23 9.96672 29.3955   3
   3 -21 -22 22.6017 36.0108   3
   3 -21 -21 2.25594 32.2678   3
   3 -21 -20-83.7734 46.5565   3
   3 -21 -19 15.1228 35.2610   3
   3 -21 -18-82.9606 46.4689   3
   3 -21 -17 57.8409 31.1855   3
   3 -21 -16 191.839 46.7116   3
   3 -21 -15 6.99675 29.7388   3
  -3 -21  14 164.508 29.3578   1
   3 -21 -14 165.260 42.1235   3
  -3 -21  13 703.705 57.6497   1
   3 -21 -13 775.510 81.4739   3
   3 -21 -12 2196.56 132.683   3
  -3 -21  12 1790.00 89.6694   1
  -3 -21  11 1029.90 69.2010   1
   3 -21 -11 1243.08 100.881   3
   3 -21 -10 701.597 76.7030   3
  -3 -21  10 506.703 49.2830   1
   3 -21  -9 14.6738 28.7567   3
  -3 -21   9 34.3961 23.6921   1
  -3 -21   8 5.50902 17.2819   1
   3 -21  -8-55.0051 39.3237   3
  -3 -21   7 183.121 33.6107   1
   3 -21  -7 89.2618 25.1905   3
   3 -21  -6 109.824 26.6482   3
  -3 -21   6 223.677 39.2989   1
  -3 -21   6 104.021 25.9448   3
   3 -21  -5 665.507 71.0932   3
  -3 -21   5 501.441 57.0305   3
  -3 -21   5 712.938 63.7721   1
   3 -21  -4 1498.85 106.507   3
  -3 -21   4 1324.64 95.6140   3
  -3 -21   3 2245.59 122.638   3
   3 -21  -3 2442.85 132.272   3
   3 -21  -2 2057.46 122.141   3
  -3 -21   2 2044.86 120.335   3
   3 -21  -1 2439.83 131.844   3
  -3 -21   1 2393.23 129.777   3
  -3 -21   0 100.593 35.8784   3
   3 -21   0 106.418 39.2845   3
  -3 -21  -1 991.304 83.8868   3
   3 -21   1 844.135 77.0730   3
  -3 -21  -2 1634.72 109.079   3
   3 -21   2 1574.98 102.982   3
  -3 -21  -3 6.46833 32.0801   3
   3 -21   3-56.6696 37.6583   3
  -3 -21  -4 88.5880 26.9938   3
   3 -21   4 23.5507 28.3491   3
  -3 -21  -5-42.8916 36.4561   3
  -3 -21  -6 94.0324 33.1009   3
  -3 -21  -7 655.466 74.1058   3
   3 -21   7 621.656 54.6245   1
   3 -21   8 3002.86 112.657   1
  -3 -21  -8 3558.14 163.838   3
   3 -21   9 1904.19 88.7471   1
  -3 -21  -9 2398.25 136.535   3
  -3 -21 -10 4291.49 186.092   3
   3 -21  10 3523.08 116.444   1
   3 -21  11 1549.56 74.6015   1
  -3 -21 -11 1910.24 126.694   3
   3 -21  12 67.3977 19.6959   1
  -3 -21 -12 108.437 38.1904   3
  -3 -21 -13-39.0837 34.6410   3
  -3 -21 -14 93.2302 39.9361   3
  -3 -21 -15 410.290 62.7056   3
  -3 -21 -16 10.1398 34.8043   3
  -3 -21 -17 150.450 39.6780   3
  -3 -21 -18 128.263 38.9401   3
  -3 -21 -19-36.3381 43.3422   3
  -3 -21 -20-34.2199 38.5223   3
  -3 -21 -21 11.9443 31.7535   3
  -3 -21 -22 289.525 62.2757   3
   3 -23 -21-7.26066 34.8753   3
   3 -23 -20-11.1326 41.7701   3
   3 -23 -19-23.3109 47.9221   3
   3 -23 -18 142.854 42.8378   3
   3 -23 -17 9.29332 32.6817   3
   3 -23 -16 531.214 75.2549   3
   3 -23 -15 232.149 54.8532   3
   3 -23 -14 180.254 51.5863   3
   3 -23 -13 138.417 45.0518   3
  -3 -23  12 1122.89 70.3673   1
   3 -23 -12 1570.91 119.519   3
  -3 -23  11-43.0753 25.0328   1
   3 -23 -11-18.4315 29.7485   3
   3 -23 -10 150.745 44.0413   3
  -3 -23  10 140.007 32.2567   1
   3 -23  -9 291.081 53.9384   3
   3 -23  -8 410.802 62.6530   3
   3 -23  -7 171.589 42.1316   3
  -3 -23   6 853.153 81.7139   3
   3 -23  -6 949.806 88.6135   3
  -3 -23   5-86.1410 41.3776   3
   3 -23  -5 12.4873 25.9250   3
   3 -23  -4 2977.01 153.714   3
  -3 -23   4 2785.64 144.071   3
   3 -23  -3 249.772 52.1753   3
  -3 -23   3 179.697 45.7599   3
   3 -23  -2 6066.42 218.801   3
  -3 -23   2 5926.81 212.568   3
  -3 -23   1 1544.71 112.348   3
   3 -23  -1 1627.86 114.597   3
  -3 -23   0 999.681 91.9898   3
   3 -23   0 1022.27 89.6919   3
  -3 -23  -1 2013.28 128.577   3
   3 -23   1 1880.49 119.598   3
  -3 -23  -2 213.556 46.6044   3
   3 -23   2 264.695 52.2394   3
  -3 -23  -3 380.007 60.9402   3
   3 -23   3 338.745 52.3689   3
  -3 -23  -4-3.10698 33.0173   3
   3 -23   4-0.72999 35.2160   3
  -3 -23  -5-33.6571 31.2282   3
   3 -23   6 98.3613 33.2153   1
  -3 -23  -6 53.7113 30.2829   3
  -3 -23  -7 92.8742 40.4312   3
   3 -23   7 144.452 32.9969   1
  -3 -23  -8 44.6181 39.0542   3
   3 -23   8 29.6891 22.2020   1
   3 -23   9 1015.23 70.6733   1
  -3 -23  -9 1193.07 102.879   3
  -3 -23 -10 268.657 53.0827   3
  -3 -23 -11 501.717 73.4934   3
  -3 -23 -12 1134.49 105.073   3
  -3 -23 -13 126.591 42.6249   3
  -3 -23 -14 292.813 57.9972   3
  -3 -23 -15 438.162 67.8265   3
  -3 -23 -16-40.9484 37.7453   3
  -3 -23 -17 22.7415 34.0276   3
  -3 -23 -18-75.0504 46.1703   3
  -3 -23 -19-7.86005 38.7379   3
   3 -25 -18 63.3722 34.3980   3
   3 -25 -17-36.6946 39.3011   3
   3 -25 -16 448.687 72.6681   3
   3 -25 -15 122.449 44.3831   3
   3 -25 -14 2430.51 158.305   3
   3 -25 -13 95.7393 50.6928   3
   3 -25 -12 3533.15 186.245   3
   3 -25 -11 37.8084 36.8982   3
   3 -25 -10 560.391 74.0753   3
   3 -25  -9-54.5133 37.4287   3
   3 -25  -8 23.3140 30.7766   3
   3 -25  -7 47.9779 31.8658   3
  -3 -25   6 628.186 77.0770   3
   3 -25  -6 666.700 78.9264   3
  -3 -25   5 336.009 57.7334   3
   3 -25  -5 424.421 65.8660   3
   3 -25  -4 257.519 52.1985   3
  -3 -25   4 189.090 44.9722   3
   3 -25  -3 319.780 58.2756   3
  -3 -25   3 339.280 57.5340   3
   3 -25  -2 581.092 73.7777   3
  -3 -25   2 424.790 60.1826   3
  -3 -25   1-24.8503 33.2196   3
   3 -25  -1 0.72583 28.8342   3
  -3 -25   0 164.923 45.9622   3
   3 -25   0 180.375 44.2520   3
  -3 -25  -1 522.507 71.9186   3
   3 -25   1 566.967 73.3313   3
  -3 -25  -2 589.652 76.1691   3
   3 -25   2 507.396 68.9218   3
  -3 -25  -3 454.085 69.7640   3
   3 -25   3 415.399 62.1376   3
   3 -25   4 454.621 64.3109   3
  -3 -25  -4 447.841 68.8748   3
  -3 -25  -5 21.9437 29.9619   3
  -3 -25  -6-15.4792 28.6078   3
  -3 -25  -7-15.4127 35.3470   3
  -3 -25  -8-0.89414 30.2590   3
  -3 -25  -9 65.7162 33.7958   3
  -3 -25 -10 1204.86 110.242   3
  -3 -25 -11 321.144 67.9204   3
  -3 -25 -12 2387.13 157.582   3
  -3 -25 -13 175.565 53.7444   3
  -3 -25 -14 773.734 94.6522   3
  -3 -25 -15-15.3208 33.9004   3
  -3 -25 -16 117.011 45.7711   3
  -3 -25 -17 93.2958 39.2783   3
   3 -27 -15 696.511 92.4079   3
   3 -27 -14 1089.37 111.561   3
   3 -27 -13 619.961 85.5908   3
   3 -27 -12 1052.86 108.809   3
   3 -27 -11 14.8687 32.1382   3
   3 -27 -10-35.2710 39.9013   3
   3 -27  -9 12.6243 35.6665   3
   3 -27  -8 4.74531 35.2210   3
   3 -27  -7 7.99552 32.6585   3
   3 -27  -6 565.493 81.4198   3
  -3 -27   5 7.36376 26.7560   3
   3 -27  -5 17.6951 33.1831   3
  -3 -27   4 421.223 67.2812   3
   3 -27  -4 529.308 78.6547   3
  -3 -27   3-7.80521 31.2519   3
   3 -27  -3-26.6117 36.5195   3
   3 -27  -2 54.0067 28.2097   3
  -3 -27   2 15.5551 30.9712   3
  -3 -27   1 23.8955 32.3641   3
   3 -27  -1 9.57039 31.1849   3
  -3 -27   0 85.0064 40.9623   3
   3 -27   0 75.0961 28.3452   3
  -3 -27  -1 55.8759 35.4131   3
   3 -27   1 36.7312 28.2399   3
  -3 -27  -2 41.1345 34.1791   3
   3 -27   2 28.0080 30.4244   3
  -3 -27  -3 502.909 73.8948   3
   3 -27   3 442.089 69.0515   3
   3 -27   4-38.7877 35.8406   3
  -3 -27  -4 18.1911 29.7896   3
  -3 -27  -5 451.398 70.7040   3
  -3 -27  -6 18.1479 34.5688   3
  -3 -27  -7-124.806 47.2995   3
  -3 -27  -8 83.6428 40.8861   3
  -3 -27  -9 519.424 77.8825   3
  -3 -27 -10 86.0246 41.2145   3
  -3 -27 -11 814.238 97.6407   3
  -3 -27 -12 866.651 100.985   3
  -3 -27 -13 155.769 48.8508   3
   3 -29  -9 3169.69 191.251   3
   3 -29  -8 292.651 66.2697   3
   3 -29  -7 1242.38 119.562   3
   3 -29  -6 23.7331 38.4937   3
   3 -29  -5 72.5165 36.0115   3
  -3 -29   5 37.6526 29.5911   3
   3 -29  -4-3.53936 30.0295   3
  -3 -29   4 21.8201 31.3071   3
  -3 -29   3 82.3958 38.2666   3
   3 -29  -3 87.9828 43.6210   3
  -3 -29   2 384.212 66.5012   3
   3 -29  -2 345.997 65.3932   3
   3 -29  -1 731.002 88.3019   3
  -3 -29   1 767.661 92.3048   3
   3 -29   0 8.06669 28.9669   3
  -3 -29   0 96.0251 41.7977   3
  -3 -29  -1 232.076 57.1962   3
   3 -29   1 306.114 64.6318   3
   3 -29   2 9.69430 32.0532   3
  -3 -29  -2 2.48997 33.9495   3
   3 -29   3-43.2715 32.8648   3
  -3 -29  -3-37.0558 39.8652   3
  -3 -29  -4-41.4764 38.9424   3
  -3 -29  -5 33.0038 37.6309   3
  -3 -29  -6 87.5344 47.6294   3
  -3 -29  -7 154.799 59.1703   3
  -3 -29  -8 1191.70 123.273   3
   4   0 -33 83.0550 42.1986   3
   4   0 -32 178.119 48.6338   3
   4   0 -31-8.68228 29.8597   3
   4   0 -30-41.8653 31.7652   3
   4   0 -29 12.3054 29.1450   3
   4   0 -28 162.222 42.2119   3
   4   0 -27 31.3374 29.5968   3
   4   0 -26 1257.25 93.6769   3
   4   0 -25-12.7812 23.7386   3
   4   0 -24 390.139 52.0052   3
   4   0 -23-30.2989 30.9782   3
   4   0 -22-28.8864 27.0114   3
   4   0 -21-27.8478 25.0074   3
   4   0 -20 120.323 28.7098   3
   4   0 -19-21.6200 22.1200   3
   4   0 -18-2.47868 17.7617   3
   4   0 -17 28.1194 20.8903   3
   4   0 -16-12.9726 20.0579   3
   4   0 -15-14.1259 18.2151   3
   4   0 -14 1005.87 58.3703   3
   4   0 -13-5.69641 16.2249   3
   4   0 -12 2029.43 75.8150   3
   4   0 -11 8.33656 16.7934   3
   4   0 -10 3391.12 86.5335   3
   4   0  -9 11.6835 21.0488   3
   4   0  -8 35323.1 239.014   3
   4   0  -7 11.7149 14.5127   3
   4   0  -6 1393.53 41.4811   3
   4   0  -5 43.8349 13.4159   3
   4   0  -4 23016.3 124.030   3
   4   0  -3 8.28107 6.01033   3
   4   0  -2 86176.0 235.061   2
   4   0  -1 4.78927 5.59582   2
  -4   0   0 76837.9 211.587   1
   4   0   0 77039.7 234.491   2
   4   0   0 77536.6 213.331   1
  -4   0  -1 5.71003 7.54856   2
  -4   0  -1 2.55906 6.38863   1
  -4   0  -1 26.0034 8.30259   3
   4   0   1 5.44428 6.05718   1
  -4   0  -2 21941.8 126.153   3
  -4   0  -2 22035.2 116.613   1
   4   0   2 21869.1 115.865   1
  -4   0  -3 31.6364 12.3545   3
  -4   0  -3 65.2101 11.3845   1
  -4   0  -4 1023.37 37.3711   3
  -4   0  -5 8.87214 13.5670   3
  -4   0  -6 38539.5 261.572   3
  -4   0  -7 23.2437 19.3543   3
  -4   0  -8 4778.88 103.456   3
  -4   0  -9 12.5430 16.5280   3
  -4   0 -10 1690.69 69.8466   3
  -4   0 -11-9.16366 16.4936   3
  -4   0 -12 14.5819 17.6355   3
  -4   0 -13-22.7252 19.4515   3
  -4   0 -14 10.2277 17.1717   3
  -4   0 -15 12.9422 17.1220   3
  -4   0 -16 38.9371 20.6192   3
  -4   0 -17-17.3100 21.9224   3
  -4   0 -18 11.2313 18.3249   3
  -4   0 -19-0.54574 22.2739   3
  -4   0 -20 1.09660 23.4318   3
  -4   0 -21-17.2293 29.4222   3
  -4   0 -22 3.23530 25.6143   3
  -4   0 -23-18.1797 25.7542   3
  -4   0 -24 164.034 39.7613   3
  -4   0 -25 33.5332 29.3907   3
  -4   0 -26 139.205 37.0547   3
  -4   0 -27-4.25816 24.6057   3
  -4   0 -28-22.8066 34.5712   3
  -4   0 -29-12.4195 28.1013   3
  -4   0 -30 261.420 55.7066   3
   4   2 -32 81.0915 39.0875   3
   4  -2 -32 102.709 35.6493   3
   4   2 -31 19.6703 28.9792   3
   4  -2 -31 34.3071 26.8333   3
   4   2 -30-9.10594 28.6315   3
   4  -2 -30-18.1637 31.7980   3
   4   2 -29 147.028 41.3231   3
   4  -2 -29 129.634 41.4232   3
   4   2 -28-12.6350 23.9267   3
   4  -2 -28 4.86683 24.1418   3
   4  -2 -27-6.57739 26.2629   3
   4   2 -27 0.67611 23.5536   3
   4   2 -26 165.770 38.0346   3
   4  -2 -26 152.270 35.5389   3
   4  -2 -25 205.934 39.4751   3
   4   2 -25 242.556 43.7013   3
   4   2 -24 43.2600 20.9722   3
   4  -2 -24-10.7149 25.0617   3
   4  -2 -23 1.20611 24.3092   3
   4   2 -23 24.7024 23.3184   3
   4   2 -22 655.100 64.0041   3
   4  -2 -22 602.637 59.8651   3
   4  -2 -21 760.257 67.9505   3
   4   2 -21 836.237 68.7545   3
   4  -2 -20 114.925 29.6767   3
   4   2 -20 168.579 34.0596   3
   4  -2 -19 1877.41 94.7784   3
   4   2 -19 2068.25 98.6111   3
   4  -2 -18 385.648 43.8307   3
   4   2 -18 411.224 45.9608   3
   4   2 -17 708.012 56.5571   3
   4  -2 -17 710.658 54.9971   3
   4   2 -16 117.073 28.2054   3
   4  -2 -16 122.190 26.2268   3
   4   2 -15 50.4457 22.6748   3
   4  -2 -15 45.5744 21.3822   3
   4  -2 -14 4296.08 117.786   3
   4  -2 -13 631.282 47.6478   3
   4  -2 -12 12006.7 177.849   3
  -4   2  12 9540.44 157.711   3
  -4   2  11 3526.72 95.7090   3
   4  -2 -11 3492.43 94.2144   3
   4  -2 -10 1513.58 59.1493   3
  -4   2  10 1544.82 60.6793   3
  -4   2   9 6277.89 111.593   3
   4  -2  -9 6297.24 111.206   3
   4  -2  -8 575.850 34.9173   3
  -4   2   8 559.162 33.0467   3
   4  -2  -7 70.6203 16.5274   3
  -4   2   7 83.0635 16.0590   3
   4  -2  -6 1000.75 37.4377   3
  -4   2   6 983.187 36.6528   3
   4  -2  -5 133.486 9.48392   2
   4  -2  -5 128.933 16.0196   3
  -4   2   5 139.180 15.0940   3
   4  -2  -4 142.343 10.2527   2
   4  -2  -4 144.894 14.0146   3
  -4   2   4 163.416 14.2644   3
  -4   2   4 141.871 10.0184   2
   4   2  -4 157.843 15.0932   1
   4   2  -3 6673.04 77.2962   1
  -4  -2   3 6520.29 76.1882   1
   4  -2  -3 6665.44 67.8886   3
  -4   2   3 6365.60 68.0240   3
  -4   2   3 6373.32 60.9620   2
  -4  -2   2 27547.1 127.917   3
  -4  -2   2 27650.7 155.893   1
   4   2  -2 26809.1 130.149   3
   4   2  -2 28421.6 157.631   1
  -4   2   2 27048.4 125.999   3
   4  -2  -2 27387.3 128.623   3
   4   2  -1 17144.1 100.648   3
  -4  -2   1 18161.7 128.604   1
   4  -2  -1 16763.7 99.0302   3
   4   2  -1 18240.9 129.370   1
   4   2   0 23203.3 116.367   3
  -4   2   0 22251.5 121.073   3
  -4  -2   0 22259.6 145.256   1
   4   2   0 21990.0 144.232   1
  -4  -2   0 23476.1 119.749   3
   4  -2   0 23869.1 120.132   3
   4   2   1 3670.25 51.6133   3
   4   2   1 3649.55 54.6716   2
  -4  -2  -1 3497.73 60.0659   1
  -4  -2  -1 3576.16 51.8043   3
  -4  -2  -2 16.2792 8.54373   2
   4   2   2 20.9801 9.76223   3
   4   2   2 22.9685 9.21453   2
  -4  -2  -2 14.4743 10.6695   3
  -4  -2  -3-3.39854 9.25590   2
   4   2   3 6.74660 9.38044   3
   4   2   3 8.97949 10.0511   2
  -4  -2  -3-7.02656 11.4219   3
  -4  -2  -4 1312.15 37.0789   2
   4   2   4 1292.62 43.9324   3
  -4  -2  -4 1306.08 43.8593   3
  -4  -2  -5 714.164 28.6760   2
  -4  -2  -5 708.766 35.5181   3
   4   2   5 710.938 34.6785   3
  -4  -2  -6 624.853 35.4785   3
  -4  -2  -6 641.994 29.5919   2
   4   2   6 640.471 36.3617   3
  -4  -2  -7 5811.98 109.270   3
   4   2   7 5870.30 111.104   3
  -4  -2  -8 2295.59 72.6572   3
   4   2   8 2341.31 73.5993   3
  -4  -2  -9 5693.38 118.503   3
   4   2   9 5287.27 116.031   3
  -4  -2 -10 6041.60 128.482   3
  -4  -2 -11 1435.56 66.6189   3
  -4  -2 -12 2391.82 87.9785   3
  -4  -2 -13 85.5559 25.5930   3
  -4   2 -13 110.090 27.2984   3
  -4   2 -14 307.473 38.6437   3
  -4  -2 -14 283.610 36.0038   3
  -4   2 -15 481.220 49.7408   3
  -4  -2 -15 474.380 45.2668   3
  -4   2 -16 905.064 65.8091   3
  -4  -2 -16 855.582 63.0855   3
  -4  -2 -17 1004.27 71.4350   3
  -4   2 -17 1136.61 74.5841   3
  -4  -2 -18 221.182 36.3706   3
  -4   2 -18 247.888 40.2422   3
  -4  -2 -19 326.783 45.0023   3
  -4   2 -19 314.885 43.9943   3
  -4   2 -20 29.1741 22.0335   3
  -4  -2 -20 7.94475 22.5098   3
  -4  -2 -21 11.3703 22.9660   3
  -4   2 -21-7.97448 21.1465   3
  -4  -2 -22-14.1795 24.2051   3
  -4   2 -22 14.4183 20.3390   3
  -4  -2 -23 2.92057 26.0123   3
  -4   2 -23 21.7095 22.9523   3
  -4   2 -24 25.5991 24.4383   3
  -4  -2 -24 21.7533 22.6479   3
  -4   2 -25 31.4551 22.3976   3
  -4  -2 -25 40.9024 24.8401   3
  -4  -2 -26 112.262 35.9396   3
  -4   2 -26 109.081 34.0626   3
  -4  -2 -27 17.8179 27.7430   3
  -4   2 -27-28.5415 24.5077   3
  -4   2 -28-25.0096 28.2181   3
  -4  -2 -28 12.9390 24.7853   3
  -4  -2 -29 95.5292 37.2311   3
  -4   2 -29 109.428 40.1888   3
  -4  -2 -30 27.1999 32.6993   3
  -4   2 -30 1.34856 27.0034   3
   4  -4 -32 283.128 60.4479   3
   4   4 -32 186.303 51.0622   3
   4   4 -31 33.5097 30.2337   3
   4  -4 -31 17.3196 31.8491   3
   4   4 -30 32.4131 31.0719   3
   4  -4 -30 41.9514 30.4816   3
   4  -4 -29 25.6822 25.9306   3
   4   4 -29-2.97812 31.4218   3
   4   4 -28-38.0897 31.7191   3
   4  -4 -28-28.8213 28.8910   3
   4  -4 -27-19.0543 25.5758   3
   4   4 -27 2.12153 22.9155   3
   4   4 -26 212.716 44.3136   3
   4  -4 -26 246.453 45.4666   3
   4   4 -25 339.564 55.2158   3
   4  -4 -25 250.007 44.8615   3
   4   4 -24 2575.74 127.843   3
   4  -4 -24 2554.75 127.958   3
   4   4 -23 253.063 49.8265   3
   4  -4 -23 170.761 41.2571   3
   4  -4 -22 3238.90 135.412   3
   4   4 -22 3311.32 139.524   3
   4   4 -21 296.507 46.6459   3
   4  -4 -21 255.999 42.9186   3
   4  -4 -20-7.26511 21.6621   3
   4   4 -20 9.27772 18.4817   3
   4  -4 -19 392.818 46.9966   3
   4  -4 -18 49.5520 19.9921   3
   4  -4 -17 17.1346 19.2666   3
   4  -4 -16 326.643 39.0601   3
  -4   4  16 387.250 41.0642   3
  -4   4  15 619.184 49.7242   3
   4  -4 -15 599.325 48.4761   3
   4  -4 -14 412.343 40.5196   3
  -4   4  14 400.304 38.9375   3
  -4   4  13 1496.54 69.9313   3
   4  -4 -13 1441.85 68.1998   3
   4  -4 -12 13696.9 197.593   3
  -4   4  12 13596.7 200.206   3
  -4   4  11 412.350 35.3386   3
   4  -4 -11 396.873 37.1663   3
  -4   4  10 6513.66 125.907   3
   4  -4 -10 6580.70 125.907   3
  -4   4   9 278.681 28.3198   3
   4   4  -9 272.971 21.9120   1
   4  -4  -9 301.857 31.0945   3
   4   4  -8 314.587 22.3234   1
   4  -4  -8 310.497 29.5685   3
  -4   4   8 331.352 28.5039   3
  -4   4   7 9965.18 132.382   3
   4   4  -7 9937.45 110.546   1
   4  -4  -6 2305.58 61.1705   3
  -4   4   6 2300.47 60.9883   3
   4   4  -6 2372.43 54.0448   1
  -4  -4   5 9221.17 105.540   1
   4   4  -5 9558.10 106.749   1
   4  -4  -5 9292.32 116.738   3
  -4  -4   4 935.538 35.4470   1
   4  -4  -4 999.793 37.8943   3
  -4   4   4 953.144 35.9283   3
   4   4  -4 973.400 35.5853   1
   4   4  -4 982.182 37.0166   3
  -4  -4   3 1660.77 46.1822   3
  -4   4   3 1610.44 45.3315   3
   4   4  -3 1693.43 47.1383   3
   4   4  -3 1674.27 47.7229   1
   4  -4  -3 1653.30 46.5453   3
  -4  -4   3 1599.22 45.4835   1
   4   4  -2 259.576 20.6654   3
  -4  -4   2 279.883 22.0846   1
   4   4  -2 344.791 24.4274   1
   4  -4  -2 266.193 21.2090   3
  -4   4   2 252.327 20.2904   3
  -4  -4   2 278.974 22.5358   3
   4   4  -1 63.0821 13.6234   3
   4  -4  -1 79.8454 14.8989   3
  -4  -4   1 82.8738 15.9087   3
  -4  -4   1 103.431 18.5383   1
  -4   4   1 80.3739 13.6025   3
  -4   4   0 38.1212 13.2194   3
   4   4   0 25.5132 10.8596   3
  -4  -4   0 12.4588 12.0185   3
   4  -4   0 21.8966 12.9530   3
   4   4   1 2168.17 52.6937   3
  -4  -4  -1 2207.10 54.2165   3
   4  -4   1 2211.65 53.0471   3
  -4   4  -1 2211.37 53.9942   3
   4   4   2 3411.58 68.7287   3
  -4  -4  -2 3489.28 69.7505   3
  -4   4  -2 3389.63 68.8625   3
  -4  -4  -3 15632.0 154.663   3
   4   4   3 15567.8 149.464   3
   4   4   3 15675.0 123.784   2
   4   4   4 779.642 37.6244   3
  -4  -4  -4 802.061 39.0253   3
   4   4   4 747.596 28.6797   2
  -4  -4  -5 7322.72 117.140   3
   4   4   5 7257.42 113.807   3
   4   4   5 7057.21 84.9488   2
   4   4   6 531.669 35.1161   3
  -4  -4  -6 526.402 35.7906   3
  -4  -4  -6 540.473 24.7086   2
  -4  -4  -7 190.487 27.0528   3
   4   4   7 214.432 25.4507   3
  -4  -4  -7 183.631 16.2572   2
  -4  -4  -8 8245.91 144.828   3
  -4  -4  -8 8165.69 98.4430   2
   4   4   8 8407.98 147.538   3
   4   4   9 164.130 25.8798   3
  -4  -4  -9 165.805 27.7220   3
  -4  -4  -9 142.046 15.4555   2
  -4  -4 -10 8004.71 101.420   2
  -4  -4 -10 8166.48 154.486   3
   4   4  10 8176.80 155.268   3
  -4  -4 -11 575.962 46.1622   3
   4   4  11 555.322 44.9112   3
  -4  -4 -11 585.924 29.9494   2
  -4  -4 -12 107.744 26.3457   3
   4   4  12 98.3279 22.9894   3
  -4  -4 -12 86.1743 14.8019   2
   4   4  13 32.1887 15.5388   3
  -4  -4 -13 21.7791 19.4251   3
  -4  -4 -13 32.6272 10.8854   2
  -4  -4 -14 610.590 33.2519   2
   4   4  14 602.788 52.4273   3
  -4  -4 -14 628.597 53.1329   3
  -4  -4 -15 14.2700 17.6180   3
  -4  -4 -15-0.73207 9.05417   2
  -4  -4 -16 545.625 33.2758   2
  -4  -4 -16 551.852 52.6834   3
  -4  -4 -17 41.4681 20.4236   3
  -4  -4 -17 57.0168 14.2395   2
  -4  -4 -18 72.3812 26.8286   3
  -4  -4 -18 96.4697 18.7008   2
  -4   4 -18 135.554 37.2723   3
  -4  -4 -19 23.2004 23.1217   3
  -4   4 -19 42.4798 31.6452   3
  -4  -4 -19 1.66959 9.64467   2
  -4  -4 -20 799.089 71.5686   3
  -4   4 -20 853.785 73.5802   3
  -4  -4 -20 791.937 45.0398   2
  -4  -4 -21 532.514 39.0593   2
  -4   4 -21 628.586 68.0704   3
  -4  -4 -21 554.996 61.4174   3
  -4   4 -22 295.624 50.7517   3
  -4  -4 -22 242.339 48.1163   3
  -4  -4 -22 296.459 31.5888   2
  -4  -4 -23 388.729 33.9886   2
  -4  -4 -23 371.262 55.0844   3
  -4   4 -23 361.756 50.9798   3
  -4  -4 -24 56.7433 28.6304   3
  -4  -4 -24 30.9432 16.2116   2
  -4   4 -24-36.8192 28.5394   3
  -4  -4 -25-0.08549 11.6876   2
  -4   4 -25 26.8686 25.8401   3
  -4  -4 -25-29.7299 30.9168   3
  -4  -4 -26 16.6203 11.3116   2
  -4  -4 -26-15.9998 26.9492   3
  -4   4 -26-13.7120 31.9438   3
  -4  -4 -27-18.8644 27.5503   3
  -4   4 -27 23.4484 29.2257   3
  -4  -4 -28 92.9119 39.7069   3
  -4   4 -28 100.578 36.0632   3
  -4   4 -29 172.689 47.6161   3
  -4  -4 -29 147.548 46.7820   3
  -4  -4 -30 287.992 60.6303   3
  -4   4 -30 330.776 61.4115   3
   4   6 -32 106.070 40.2892   3
   4  -6 -32 100.045 46.9700   3
   4   6 -31 452.930 70.0426   3
   4  -6 -31 365.485 64.0072   3
   4   6 -30 52.3919 34.9427   3
   4  -6 -30 23.2182 30.7365   3
   4  -6 -29 88.7501 36.1353   3
   4   6 -29 100.682 36.5906   3
   4  -6 -28 67.2195 31.3112   3
   4   6 -28 58.1886 35.1823   3
   4   6 -27 10.4128 25.1061   3
   4   6 -27-4.09694 12.2747   1
   4  -6 -27-21.1926 30.4043   3
   4   6 -26 456.612 36.3390   1
   4  -6 -26 435.307 59.2196   3
   4   6 -26 502.963 62.1802   3
   4   6 -25 71.2418 36.5466   3
   4  -6 -25 51.8102 36.0934   3
   4   6 -25 62.0770 22.1164   1
   4   6 -24 5749.73 123.590   1
   4   6 -24 5952.97 198.294   3
   4  -6 -24 5719.14 191.230   3
   4  -6 -23 383.415 55.8284   3
   4   6 -23 354.440 33.7565   1
   4   6 -23 365.456 54.0286   3
   4  -6 -22 4856.14 166.846   3
   4   6 -22 4839.92 109.511   1
   4   6 -21 264.289 27.0290   1
   4  -6 -21 295.742 45.1095   3
   4  -6 -20 278.946 40.9476   3
   4   6 -20 271.464 25.7084   1
   4   6 -19 10.6558 9.87079   1
   4  -6 -19 14.3714 19.0814   3
  -4   6  18 146.580 29.9490   3
   4  -6 -18 166.568 34.3601   3
   4   6 -18 162.441 19.3669   1
  -4   6  17-4.44095 16.3583   3
   4   6 -17-6.68911 9.82477   1
   4  -6 -17 15.2162 21.0163   3
   4  -6 -16 2283.72 98.9056   3
   4   6 -16 2392.51 67.4844   1
  -4   6  16 2498.34 103.853   3
   4   6 -15 183.616 19.7141   1
   4  -6 -15 195.013 32.5938   3
  -4   6  15 199.775 31.4502   3
  -4   6  14 633.960 50.4927   3
   4  -6 -14 593.221 49.3170   3
   4   6 -14 610.428 34.1743   1
  -4   6  13 406.102 39.9433   3
   4   6 -13 345.928 25.6613   1
   4  -6 -13 333.329 36.0966   3
  -4   6  12 3879.71 110.459   3
   4  -6 -12 3747.43 111.216   3
   4   6 -12 3770.49 79.1076   1
  -4   6  11 337.803 34.2721   3
   4  -6 -11 339.778 34.7420   3
   4   6 -11 327.620 24.9279   1
  -4   6  10 5439.10 122.812   3
   4  -6 -10 5373.40 121.429   3
   4   6 -10 5320.90 90.6336   1
  -4   6   9 144.550 22.8812   3
   4  -6  -9 163.936 26.7089   3
   4   6  -9 140.718 17.5933   1
  -4   6   8 1019.17 50.6527   3
   4  -6  -8 1006.32 51.4015   3
   4   6  -8 1007.04 40.6086   1
  -4  -6   7 999.373 40.2273   1
   4  -6  -7 1072.80 51.7937   3
   4   6  -7 1127.55 42.2300   1
  -4   6   7 1091.13 49.7044   3
   4   6  -6 41.3650 14.1607   1
   4   6  -6 0.44679 14.5245   3
  -4  -6   6 14.3742 12.3373   1
  -4   6   6 20.3783 13.8879   3
   4  -6  -6 7.94098 17.1322   3
  -4   6   5 1675.86 57.6660   3
   4  -6  -5 1647.62 59.3993   3
   4   6  -5 1765.48 53.2670   1
  -4  -6   5 1714.62 52.2087   1
   4   6  -5 1819.55 60.5239   3
   4   6  -4 949.494 44.6375   3
   4  -6  -4 908.366 44.9554   3
   4   6  -4 1028.21 43.7302   1
  -4   6   4 844.128 41.0790   3
  -4  -6   4 873.641 39.1410   1
  -4  -6   4 876.058 42.6510   3
  -4  -6   3 1213.05 46.7643   1
   4  -6  -3 1221.86 50.3201   3
  -4   6   3 1174.37 46.4640   3
   4   6  -3 1216.31 48.5841   3
  -4  -6   3 1219.40 49.0314   3
  -4   6   2 540.950 34.0447   3
   4  -6  -2 576.370 35.6057   3
   4   6  -2 614.497 35.5213   3
  -4  -6   2 593.929 35.0572   1
  -4  -6   2 607.606 35.8555   3
   4   6  -1 4297.29 88.5518   3
  -4   6   1 4460.42 89.8857   3
   4  -6  -1 4535.46 90.0264   3
  -4  -6   1 4455.11 90.4772   3
  -4   6   0 1118.85 47.4210   3
   4  -6   0 1193.88 48.0094   3
  -4  -6   0 1130.88 47.3829   3
   4   6   0 1178.31 46.9002   3
   4  -6   1 261.470 26.4667   3
   4   6   1 297.094 25.8763   3
  -4   6  -1 277.406 26.8886   3
  -4  -6  -1 279.199 27.7950   3
   4   6   2 2351.90 64.9109   3
   4  -6   2 2420.36 69.0233   3
  -4  -6  -2 2598.40 72.0184   3
  -4   6  -2 2575.66 70.9789   3
  -4  -6  -3 251.110 27.3323   3
  -4   6  -3 286.138 26.4123   3
   4   6   3 257.316 26.3743   3
  -4   6  -4 88.1944 18.2371   3
   4   6   4 85.5853 17.1442   3
  -4  -6  -4 93.7934 21.6284   3
   4   6   5 764.481 43.6148   3
  -4  -6  -5 783.535 43.4609   3
   4   6   5 786.201 31.2965   2
  -4  -6  -6 77.3207 22.3882   3
   4   6   6 75.7298 12.5482   2
   4   6   6 51.0521 15.7319   3
   4   6   7 192.348 25.9937   3
   4   6   7 192.941 16.9537   2
  -4  -6  -7 191.904 25.7501   3
  -4  -6  -8 4520.70 112.381   3
   4   6   8 4554.22 112.483   3
   4   6   9 11.3589 14.3546   3
  -4  -6  -9-13.2302 18.5663   3
   4   6  10 4076.63 114.907   3
  -4  -6 -10 4050.54 115.490   3
  -4  -6 -11 675.031 51.6400   3
   4   6  11 674.229 49.8101   3
  -4  -6 -12 1104.98 64.7808   3
   4   6  12 1152.56 66.5932   3
  -4  -6 -12 1073.52 37.9678   2
  -4  -6 -13 1205.09 40.7641   2
  -4  -6 -13 1182.21 69.9896   3
   4   6  13 1238.57 71.8382   3
  -4  -6 -14 1402.56 77.6708   3
  -4  -6 -14 1410.56 44.6488   2
   4   6  14 1552.37 81.6450   3
   4   6  15 302.115 38.0759   3
  -4  -6 -15 312.908 40.9393   3
  -4  -6 -15 332.908 23.0955   2
   4   6  16 117.548 27.9150   3
  -4  -6 -16 105.416 14.5237   2
  -4  -6 -16 70.8312 23.9192   3
  -4  -6 -17-4.57311 9.19387   2
  -4  -6 -17 3.67660 19.2176   3
  -4  -6 -18 284.053 23.0667   2
  -4  -6 -18 257.821 41.4681   3
  -4  -6 -19 47.1205 26.4948   3
  -4  -6 -19 51.7580 11.1270   2
  -4  -6 -20 3187.80 136.456   3
  -4  -6 -20 3067.14 76.9536   2
  -4  -6 -21 363.597 27.5646   2
  -4   6 -21 569.076 67.1634   3
  -4  -6 -21 499.544 60.4444   3
  -4   6 -22 2439.22 127.078   3
  -4  -6 -22 2370.05 124.574   3
  -4  -6 -22 2041.90 63.8039   2
  -4  -6 -23 589.830 69.1719   3
  -4   6 -23 507.112 64.2129   3
  -4  -6 -23 541.834 34.1012   2
  -4   6 -24 48.9502 31.5558   3
  -4  -6 -24 31.1343 12.4754   2
  -4  -6 -24 9.63886 26.2267   3
  -4   6 -25 158.906 41.1473   3
  -4  -6 -25 110.836 30.8726   3
  -4   6 -26-17.9662 25.3033   3
  -4  -6 -26-29.0136 24.1766   3
  -4   6 -27 44.5976 30.3486   3
  -4  -6 -27 13.2962 28.1952   3
  -4   6 -28 226.912 54.5531   3
  -4  -6 -28 295.998 56.1486   3
  -4   6 -29 140.187 50.6123   3
  -4  -6 -29 117.181 45.8298   3
  -4  -6 -30 282.252 58.0752   3
  -4   6 -30 293.179 59.1001   3
   4  -8 -31 102.389 37.2283   3
   4   8 -31 87.8332 36.7954   3
   4  -8 -30 112.824 44.5017   3
   4   8 -30 119.045 40.1716   3
   4   8 -29 15.0867 30.9651   3
   4  -8 -29 36.1225 30.1515   3
   4  -8 -28-7.72488 26.2737   3
   4   8 -28 24.9810 35.5047   3
   4   8 -27 29.2712 26.8781   3
   4  -8 -27 23.3900 30.6513   3
   4   8 -26 11.4942 26.3083   3
   4   8 -26 10.6852 10.4837   1
   4  -8 -26-35.5991 26.1807   3
   4   8 -25 295.354 27.2408   1
   4  -8 -25 356.478 54.5473   3
   4   8 -24 961.377 48.1187   1
   4  -8 -24 1007.43 83.5358   3
   4   8 -23 976.349 48.0403   1
   4  -8 -23 981.891 80.3333   3
   4   8 -22 1324.72 55.6042   1
   4  -8 -22 1371.22 95.2432   3
   4   8 -21 7.57429 11.2275   1
   4  -8 -21 11.5189 20.1001   3
   4   8 -20 7.01025 10.1901   1
   4  -8 -20 13.4999 21.0703   3
   4  -8 -19 652.234 60.8719   3
   4   8 -19 730.468 40.5003   1
  -4   8  18 393.211 46.6802   3
   4   8 -18 417.345 30.3810   1
   4  -8 -18 429.889 50.5620   3
   4  -8 -17 111.779 29.0246   3
  -4   8  17 161.113 33.1799   3
   4   8 -17 130.142 17.5720   1
  -4   8  16 230.692 34.7890   3
   4  -8 -16 226.600 36.0221   3
   4   8 -16 222.551 21.9628   1
  -4   8  15 869.696 47.7166   3
   4  -8 -15 797.175 58.6126   3
   4   8 -15 822.038 40.0896   1
   4   8 -14 87.4170 14.4034   1
  -4   8  14 126.399 26.5621   3
   4  -8 -14 125.379 27.7255   3
   4   8 -13 1256.99 49.1575   1
  -4   8  13 1344.04 71.7534   3
   4  -8 -13 1263.22 70.0516   3
  -4   8  12 4592.74 127.277   3
   4  -8 -12 4508.05 126.019   3
   4   8 -12 4517.34 91.4263   1
   4  -8 -11 5894.07 141.004   3
   4   8 -11 5856.44 104.586   1
  -4   8  11 5919.18 140.791   3
  -4   8  10 2256.86 85.3499   3
   4   8 -10 2258.93 65.3398   1
   4  -8 -10 2309.61 87.6252   3
  -4  -8   9 126.279 18.5830   1
   4   8  -9 138.511 20.8644   1
   4  -8  -9 145.299 26.7581   3
  -4   8   9 110.358 21.4634   3
  -4   8   8 1647.79 68.8728   3
   4   8  -8 1709.23 71.2369   3
   4  -8  -8 1642.93 69.2551   3
   4   8  -8 1696.62 57.5411   1
  -4  -8   8 1625.57 55.2069   1
   4   8  -7 2845.38 74.2168   1
  -4   8   7 2727.66 85.5184   3
  -4  -8   7 2693.46 71.3657   1
   4   8  -7 2866.05 89.1630   3
   4  -8  -7 2764.67 88.1429   3
   4   8  -6 3270.44 92.8248   3
  -4   8   6 3022.56 87.4883   3
   4  -8  -6 3318.81 94.5044   3
  -4  -8   6 3060.40 77.3630   1
   4  -8  -5 668.847 45.1837   3
  -4   8   5 614.556 39.7325   3
   4   8  -5 663.020 42.8866   3
  -4  -8   5 617.354 37.5328   1
  -4  -8   5 607.930 40.8414   3
  -4   8   4 1631.18 63.8003   3
  -4  -8   4 1623.75 58.5169   1
   4  -8  -4 1655.73 68.0067   3
  -4  -8   4 1653.42 65.7217   3
   4   8  -4 1692.75 67.0385   3
  -4   8   3 20.2564 16.4493   3
   4   8  -3-2.40624 17.4820   3
  -4  -8   3 9.18571 18.7896   3
   4  -8  -3 16.3516 20.2622   3
  -4  -8   3 12.3535 16.7740   1
   4  -8  -2 7.15515 19.6040   3
  -4   8   2 29.9607 16.3339   3
   4   8  -2 32.7870 16.2070   3
  -4  -8   2 7.80539 19.5366   3
   4   8  -1 88.9180 21.1933   3
  -4  -8   1 70.4330 22.9851   3
  -4   8   1 55.4645 20.1098   3
   4  -8  -1 85.1747 25.3812   3
   4   8   0 507.477 37.4974   3
   4  -8   0 649.422 43.2198   3
  -4  -8  -1 281.111 31.7184   3
   4   8   1 279.754 29.4659   3
  -4   8  -1 314.211 33.4529   3
   4  -8   1 286.384 31.1583   3
   4   8   2 1642.63 63.2311   3
   4  -8   2 1704.53 65.9844   3
  -4   8  -2 1691.75 68.0787   3
  -4  -8  -2 1707.37 68.3507   3
  -4   8  -3 92.0899 22.3181   3
  -4  -8  -3 96.0676 24.5322   3
   4   8   3 45.7367 15.3422   3
  -4  -8  -4 2876.91 88.4310   3
   4   8   4 2740.83 82.9844   3
  -4   8  -4 2908.70 88.2204   3
  -4   8  -5 2883.96 90.7620   3
   4   8   5 2806.64 87.5531   3
  -4  -8  -5 2803.87 91.3396   3
   4   8   6 1712.07 70.5963   3
  -4   8  -6 1797.77 73.1060   3
  -4  -8  -6 1795.40 72.0421   3
   4   8   7 13.2587 8.36547   2
   4  -8   7 16.8726 6.70070   1
  -4  -8  -7 35.6734 18.6659   3
   4   8   7 49.2175 18.3470   3
  -4  -8  -8 3636.30 108.058   3
   4   8   8 3666.94 107.753   3
   4  -8   8 3359.99 40.6869   1
   4   8   8 3457.41 66.4154   2
   4   8   9 2453.10 91.6306   3
  -4  -8  -9 2345.09 90.9420   3
   4   8   9 2196.97 52.8872   2
   4   8  10 3794.11 116.983   3
  -4  -8 -10 3742.80 115.787   3
  -4  -8 -11 22.4062 17.1273   3
   4   8  11-3.40732 15.5829   3
   4   8  12 312.148 37.8714   3
  -4  -8 -12 304.545 38.0425   3
  -4  -8 -13 1776.23 88.9281   3
   4   8  13 1859.32 89.4270   3
   4   8  14 64.9816 24.1644   3
  -4  -8 -14 41.3742 20.9060   3
  -4  -8 -15 53.8448 21.6547   3
   4   8  15 29.1284 18.7719   3
  -4  -8 -16 447.215 50.9441   3
  -4  -8 -17 354.934 46.3961   3
  -4  -8 -18-11.9443 24.6092   3
  -4  -8 -19 55.1059 26.1987   3
  -4  -8 -20 1541.18 98.0365   3
  -4  -8 -21-3.26926 22.9096   3
  -4  -8 -22 443.053 57.7986   3
  -4  -8 -23 82.8486 30.3040   3
  -4  -8 -24 5.15227 23.3841   3
  -4   8 -24 49.7770 32.1439   3
  -4  -8 -25 229.098 48.6200   3
  -4   8 -25 195.742 44.7318   3
  -4  -8 -26 8.14663 26.6496   3
  -4   8 -26 75.8313 40.1554   3
  -4  -8 -27-11.3102 31.2773   3
  -4   8 -27-23.8561 28.3209   3
  -4  -8 -28 34.6390 27.9167   3
  -4   8 -28 52.9607 30.2919   3
  -4   8 -29 34.7348 28.9203   3
  -4  -8 -29-46.4474 34.7813   3
   4  10 -31-28.1110 39.0585   3
   4 -10 -31-29.4250 38.4284   3
   4 -10 -30 29.3194 31.0276   3
   4  10 -30-37.5991 33.4277   3
   4  10 -29 126.106 40.1695   3
   4 -10 -29 53.7900 32.9012   3
   4  10 -28 112.150 30.6719   3
   4 -10 -28 246.712 50.7648   3
   4 -10 -27-8.61448 26.2987   3
   4 -10 -26 670.837 76.7479   3
   4 -10 -25-27.8129 24.9504   3
   4  10 -25-4.24488 9.54762   1
   4 -10 -24 7.42454 26.0986   3
   4  10 -24 27.2109 9.25157   1
   4 -10 -23 74.7648 25.0808   3
   4  10 -23 94.7645 16.7129   1
   4  10 -22 13.5965 10.2830   1
   4 -10 -22-55.6656 40.4151   3
   4 -10 -21 4.95867 24.8513   3
   4  10 -21-12.2180 12.3192   1
   4  10 -20 133.293 19.5750   1
   4 -10 -20 109.798 27.1458   3
   4 -10 -19 1961.09 107.125   3
   4  10 -19 2036.56 67.5535   1
   4  10 -18 235.223 24.3136   1
   4 -10 -18 252.058 42.1187   3
   4 -10 -17 760.826 63.6781   3
   4  10 -17 784.038 41.5643   1
   4  10 -16 81.9716 15.8702   1
  -4  10  16 53.2907 21.4565   3
   4 -10 -16 101.421 29.1668   3
   4  10 -15 130.537 19.1357   1
   4 -10 -15 71.6497 22.4593   3
  -4  10  15 86.7239 23.3011   3
  -4  10  14 241.031 34.8888   3
   4  10 -14 255.877 25.5882   1
   4 -10 -14 198.621 32.4654   3
   4  10 -13 1248.53 51.9314   1
  -4  10  13 1330.80 75.9176   3
   4 -10 -13 1289.02 74.6957   3
   4  10 -12 42.9742 17.8140   1
  -4  10  12-12.0582 18.1295   3
   4 -10 -12-1.24490 17.7908   3
   4  10 -11 6774.54 160.177   3
   4 -10 -11 6313.01 156.301   3
  -4  10  11 6299.62 154.698   3
  -4 -10  11 6047.00 110.316   1
   4  10 -10 2356.58 93.3356   3
  -4  10  10 2230.76 89.5351   3
  -4 -10  10 2144.17 67.3041   1
   4 -10 -10 2234.75 92.6634   3
   4  10  -9 1576.02 76.4476   3
   4 -10  -9 1494.92 74.0847   3
  -4  10   9 1504.28 73.0422   3
  -4 -10   9 1494.33 57.3898   1
  -4  10   8 2882.19 97.9169   3
   4  10  -8 3092.39 102.413   3
  -4 -10   8 2834.81 79.7384   1
   4 -10  -8 2961.68 101.110   3
  -4  10   7-2.78483 18.2068   3
   4  10  -7 32.8049 17.3178   3
   4 -10  -7 15.8622 17.9185   3
  -4 -10   7-6.75784 14.5859   1
   4  10  -6 2083.32 84.5643   3
  -4 -10   6 2014.32 69.0914   1
   4 -10  -6 2081.37 84.7788   3
  -4  10   6 1938.74 78.1126   3
   4  10  -5 163.637 26.0011   3
   4 -10  -5 170.915 26.4697   3
  -4  10   5 197.911 26.6835   3
  -4 -10   5 178.825 28.1777   3
  -4 -10   5 215.746 25.8114   1
  -4 -10   4 3278.11 99.4288   3
   4  10  -4 3426.36 105.707   3
  -4  10   4 3293.26 99.2056   3
   4 -10  -4 3376.92 104.884   3
  -4 -10   4 3122.83 89.0040   1
   4  10  -3 73.8067 21.2605   3
  -4 -10   3 61.6330 22.8124   3
   4 -10  -3 39.4618 21.0455   3
  -4  10   3 114.733 24.7057   3
  -4 -10   3 74.8697 23.4330   1
  -4 -10   2 31471.2 309.373   3
  -4  10   2 31112.9 303.804   3
   4 -10  -2 31884.5 311.445   3
   4  10  -2 31326.6 305.311   3
   4 -10  -1 176.549 29.8738   3
  -4  10   1 171.035 28.8534   3
  -4 -10   1 222.617 35.2405   3
   4  10  -1 170.473 29.0144   3
   4 -10   0 30793.5 304.430   3
   4  10   0 30972.1 305.004   3
  -4  10   0 31865.1 311.056   3
  -4 -10   0 31861.3 311.389   3
  -4 -10  -1 349.317 37.2940   3
   4 -10   1 342.197 35.8740   3
  -4  10  -1 264.854 30.4641   3
   4  10   1 318.858 34.5864   3
   4 -10   2 4720.80 121.476   3
  -4  10  -2 5058.75 127.070   3
   4  10   2 4711.99 117.255   3
  -4 -10  -2 4947.03 127.272   3
   4  10   3 483.399 39.3570   3
  -4 -10  -3 500.844 43.2419   3
  -4  10  -3 527.109 43.1231   3
   4 -10   3 461.678 39.0379   3
  -4 -10  -4 1293.16 67.1421   3
  -4  10  -4 1311.60 68.5973   3
   4  10   4 1174.59 60.2508   3
  -4 -10  -5-4.04334 19.3178   3
   4  10   5-18.8673 19.3721   3
  -4  10  -5-2.92596 16.8581   3
   4  10   6 2799.08 95.5714   3
  -4 -10  -6 2825.70 98.9371   3
  -4  10  -6 3006.58 104.107   3
  -4 -10  -7 1831.58 82.1349   3
   4 -10   7 1698.05 46.1028   1
  -4  10  -7 1838.09 83.4288   3
   4  10   7 1838.39 79.3032   3
   4  10   8 453.422 26.9452   2
  -4  10  -8 508.505 45.6748   3
   4  10   8 496.749 46.0994   3
   4 -10   8 409.244 21.5034   1
  -4 -10  -8 514.239 46.1288   3
   4  10   9 4992.25 84.8707   2
   4  10   9 5131.00 141.892   3
   4 -10   9 5000.80 65.0636   1
  -4  10  -9 5458.00 145.940   3
  -4 -10  -9 5331.27 142.042   3
   4  10  10 159.529 15.8927   2
   4  10  10 188.202 30.6258   3
  -4 -10 -10 207.106 33.9420   3
  -4 -10 -11 470.914 47.0222   3
   4  10  11 443.024 45.2622   3
   4  10  12 362.368 42.4997   3
  -4 -10 -12 264.240 36.3947   3
   4  10  13 122.344 26.0952   3
  -4 -10 -13 126.592 28.6200   3
   4  10  14 1.67032 15.2720   3
  -4 -10 -14 3.67946 18.0635   3
  -4 -10 -15 792.142 65.5541   3
  -4 -10 -16-21.4605 24.6911   3
  -4 -10 -17 809.462 68.7048   3
  -4 -10 -18-21.6685 27.3602   3
  -4 -10 -19 9.27001 25.1277   3
  -4 -10 -20-18.4955 33.0641   3
  -4 -10 -21 14.1539 24.7240   3
  -4 -10 -22 9.57500 23.2520   3
  -4 -10 -23 294.638 52.3528   3
  -4 -10 -24 215.107 49.5518   3
  -4 -10 -25 293.945 57.9544   3
  -4 -10 -26 23.4542 31.5612   3
  -4  10 -26 79.9808 32.0575   3
  -4  10 -27 30.2072 29.2657   3
  -4 -10 -27 56.0735 31.5298   3
  -4  10 -28-57.6058 43.3242   3
  -4 -10 -28-23.8223 28.9097   3
   4  12 -30-84.2594 52.4406   3
   4 -12 -30 43.8174 34.3315   3
   4 -12 -29 270.227 57.5617   3
   4 -12 -28-20.7419 29.6331   3
   4 -12 -27-31.0588 29.1383   3
   4 -12 -26-22.2020 26.7928   3
   4 -12 -25 45.5600 36.6731   3
   4 -12 -24 70.2231 31.6719   3
   4 -12 -23 551.088 65.9959   3
   4 -12 -22-11.3145 28.8653   3
   4 -12 -21 1252.56 91.7200   3
   4 -12 -20 8.76185 21.3723   3
   4 -12 -19-85.5037 31.8570   3
   4 -12 -18 84.0415 25.5542   3
   4 -12 -17 53.1349 23.2989   3
   4 -12 -16 561.830 55.3143   3
  -4  12  15 885.447 68.4363   3
   4  12 -15 917.841 70.6297   3
   4 -12 -15 859.935 65.9590   3
  -4  12  14 2329.63 107.217   3
   4 -12 -14 2122.48 103.777   3
   4  12 -14 2354.61 108.796   3
   4  12 -13 592.121 54.7849   3
  -4  12  13 577.625 53.4121   3
   4 -12 -13 516.136 52.0489   3
  -4  12  12 1095.58 70.4200   3
  -4 -12  12 1021.25 49.9173   1
   4  12 -12 1130.77 73.4760   3
   4 -12 -12 993.534 69.2120   3
  -4 -12  11 253.726 27.5433   1
   4 -12 -11 298.844 41.3134   3
  -4  12  11 293.158 39.2328   3
   4  12 -11 310.567 41.4669   3
   4 -12 -10 1582.79 82.8733   3
   4  12 -10 1672.56 86.2826   3
  -4 -12  10 1495.62 61.9784   1
  -4  12  10 1521.23 80.0816   3
   4  12  -9 1856.72 88.5761   3
  -4  12   9 1603.16 81.4270   3
   4 -12  -9 1687.59 85.9327   3
  -4 -12   9 1575.58 64.6136   1
   4 -12  -8 4295.33 134.609   3
  -4 -12   8 4068.52 104.798   1
   4  12  -8 4548.85 137.257   3
  -4  12   8 4126.09 125.730   3
  -4  12   7 481.934 44.0446   3
   4  12  -7 524.829 49.0904   3
  -4 -12   7 458.934 37.6921   1
   4 -12  -7 513.732 48.2040   3
  -4  12   6 525.422 44.6364   3
   4  12  -6 571.634 49.9122   3
  -4 -12   6 524.586 39.7902   1
  -4 -12   6 515.340 45.1098   3
   4 -12  -6 558.149 48.5980   3
  -4 -12   5 37.2234 17.9052   1
   4 -12  -5 6.95073 21.1923   3
   4  12  -5 15.5763 18.5027   3
  -4 -12   5-10.7044 22.5422   3
  -4  12   5 25.1406 15.7809   3
  -4  12   4 5071.60 135.071   3
  -4 -12   4 4943.04 122.043   1
  -4 -12   4 5227.05 137.153   3
   4  12  -4 5565.30 145.372   3
   4 -12  -4 5475.70 144.593   3
  -4 -12   3 2306.76 92.8748   3
   4 -12  -3 2456.33 97.3289   3
  -4  12   3 2217.89 93.7682   3
   4  12  -3 2373.91 94.5037   3
   4  12  -2 18676.9 264.848   3
  -4 -12   2 18903.5 261.741   3
   4 -12  -2 19088.6 263.317   3
  -4  12   2 18791.1 262.703   3
   4 -12  -1 10341.1 194.733   3
  -4  12   1 10419.3 198.157   3
   4  12  -1 10676.3 197.002   3
  -4 -12   1 10504.2 196.263   3
  -4  12   0 15983.4 244.479   3
  -4 -12   0 15920.6 242.465   3
   4  12   0 15790.2 239.145   3
   4 -12   0 16002.3 241.718   3
  -4 -12  -1 3152.43 110.173   3
  -4  12  -1 3227.96 110.985   3
   4  12   1 3023.38 103.773   3
   4 -12   1 3218.71 108.094   3
   4  12   2 1131.11 63.4742   3
  -4  12  -2 1240.05 69.6832   3
  -4 -12  -2 1169.09 68.7124   3
   4 -12   2 1118.18 64.4443   3
  -4  12  -3 782.258 56.6627   3
   4  12   3 753.273 52.9823   3
  -4 -12  -3 766.723 56.8234   3
   4 -12   3 744.097 54.3741   3
  -4 -12  -4 6.61838 22.0019   3
  -4  12  -4 29.5220 17.8542   3
   4  12   4-7.48819 15.7448   3
   4  12   5 1483.38 76.0534   3
  -4  12  -5 1611.54 81.8777   3
  -4 -12  -5 1603.90 82.3081   3
  -4 -12  -6 1043.91 66.8603   3
   4  12   6 944.077 61.1124   3
  -4  12  -6 1096.87 70.2859   3
  -4  12  -7 104.676 25.1372   3
   4  12   7 118.860 24.2976   3
  -4 -12  -7 97.7614 23.3494   3
   4 -12   7 131.758 18.2503   1
   4  12   8 156.744 29.6535   3
  -4 -12  -8 114.377 29.3846   3
   4 -12   8 111.258 15.0884   1
  -4  12  -8 142.212 30.0866   3
   4  12   9 16.3692 10.0060   2
   4  12   9 9.11795 15.1841   3
   4 -12   9 12.5856 8.53301   1
  -4  12  -9 1.87665 51.6299   3
  -4 -12  -9 23.7268 17.7678   3
   4  12  10 1271.11 75.3523   3
   4  12  10 1160.21 43.9880   2
  -4 -12 -10 1257.54 77.7913   3
  -4  12 -10 1286.03 79.0714   3
   4 -12  10 1171.37 37.4453   1
  -4 -12 -11 567.494 55.2717   3
   4  12  11 642.979 58.2985   3
  -4  12 -11 607.260 56.9800   3
   4  12  11 565.416 29.8808   2
  -4 -12 -12 852.450 66.9056   3
  -4  12 -12 1044.86 72.8892   3
   4  12  12 994.015 71.3971   3
   4  12  12 861.693 34.5531   2
  -4 -12 -13 850.531 67.8659   3
  -4 -12 -14-25.0434 25.6091   3
  -4 -12 -15 113.917 25.9434   3
  -4 -12 -16-27.9832 26.9915   3
  -4 -12 -17 107.744 30.4892   3
  -4 -12 -18 122.667 34.5443   3
  -4 -12 -19 776.276 73.7249   3
  -4 -12 -20 137.438 35.2852   3
  -4 -12 -21-25.8553 27.8740   3
  -4 -12 -22-4.88544 22.6865   3
  -4 -12 -23 501.454 68.1044   3
  -4 -12 -24 33.6084 30.6291   3
  -4 -12 -25 67.8000 34.8290   3
  -4 -12 -26 191.995 48.3901   3
  -4 -12 -27 64.4909 34.7461   3
  -4 -12 -28 278.246 56.7688   3
  -4  12 -28 284.738 54.6985   3
   4 -14 -29 140.547 43.0664   3
   4 -14 -28-18.2894 34.1668   3
   4 -14 -27-32.0220 35.3127   3
   4 -14 -26 17.5838 26.2790   3
   4 -14 -25 23.7796 25.0788   3
   4 -14 -24 136.792 38.6589   3
   4 -14 -23 501.416 66.3988   3
   4 -14 -22 116.539 36.9298   3
   4 -14 -21 1341.94 99.6655   3
   4 -14 -20 999.747 83.8866   3
   4 -14 -19 285.112 50.0841   3
   4 -14 -18 354.730 51.9496   3
   4 -14 -17-39.1585 28.8982   3
   4 -14 -16 710.338 67.8861   3
   4 -14 -15 102.839 28.6204   3
   4 -14 -14 6568.25 190.205   3
   4 -14 -13 451.768 55.2512   3
  -4 -14  13 343.129 31.7838   1
   4 -14 -12 8467.14 207.311   3
   4  14 -12 8492.70 210.945   3
  -4 -14  12 7836.10 147.387   1
  -4  14  12 8269.39 200.672   3
   4 -14 -11 208.632 38.3965   3
  -4 -14  11 179.973 26.3261   1
  -4  14  11 199.211 36.0886   3
   4  14 -11 227.639 37.3456   3
   4 -14 -10 1452.32 85.6839   3
  -4 -14  10 1338.98 63.2224   1
  -4  14  10 1332.07 80.8723   3
   4  14 -10 1504.18 88.7892   3
  -4  14   9 153.937 30.4566   3
   4 -14  -9 148.332 31.6733   3
   4  14  -9 162.751 31.8567   3
  -4 -14   9 140.813 23.5433   1
   4  14  -8 37.1140 20.1706   3
   4 -14  -8 15.4663 19.6126   3
  -4  14   8 18.7896 22.9640   3
  -4 -14   8 35.4693 16.0456   1
   4 -14  -7 425.571 49.3183   3
   4  14  -7 437.623 47.4635   3
  -4 -14   7 358.707 36.1371   1
  -4  14   7 399.253 44.9196   3
  -4 -14   6 47.4901 18.8531   1
   4 -14  -6 65.4980 28.0915   3
  -4 -14   6 42.7955 23.2901   3
  -4  14   6 31.3507 19.3065   3
   4  14  -6 48.3679 23.6908   3
  -4 -14   5 4002.01 131.717   3
  -4 -14   5 3907.49 115.835   1
  -4  14   5 4066.41 131.385   3
   4 -14  -5 4304.86 140.414   3
   4  14  -5 4379.03 140.136   3
   4  14  -4-0.86530 16.3748   3
  -4  14   4 25.3811 17.3665   3
  -4 -14   4-8.57771 18.9582   3
   4 -14  -4 2.62278 20.1617   3
  -4 -14   4 45.1325 22.2956   1
  -4 -14   3 44.2239 22.9849   3
  -4  14   3 37.6323 17.8826   3
   4  14  -3 6.82035 16.7654   3
   4 -14  -3-3.22078 20.3863   3
   4  14  -2 785.289 58.7318   3
  -4 -14   2 842.131 62.8600   3
   4 -14  -2 836.626 62.5328   3
  -4  14   2 842.466 62.9692   3
  -4 -14   1 3001.30 115.155   3
  -4  14   1 3010.88 115.099   3
   4  14  -1 2991.20 114.093   3
   4 -14  -1 2905.76 113.319   3
   4 -14   0 10.8802 19.4512   3
  -4  14   0 23.0438 19.5152   3
  -4 -14   0 9.70568 19.1234   3
   4  14   0-1.62600 17.2378   3
   4 -14   1-14.3472 19.5839   3
   4  14   1-3.26559 18.6695   3
  -4  14  -1-1.32632 18.7849   3
  -4 -14  -1-27.7276 23.5235   3
   4  14   2 3268.13 116.925   3
   4 -14   2 3161.17 118.251   3
  -4  14  -2 3434.01 126.012   3
  -4 -14  -2 3485.41 125.536   3
  -4 -14  -3 2437.28 106.124   3
   4  14   3 2366.64 100.545   3
   4 -14   3 2276.59 99.5351   3
  -4  14  -3 2549.27 108.498   3
   4  14   4 3236.39 117.999   3
  -4  14  -4 3649.73 130.099   3
   4 -14   4 3301.27 119.546   3
  -4 -14  -4 3482.42 128.863   3
   4  14   5 368.833 41.4349   3
  -4  14  -5 418.393 48.1528   3
  -4 -14  -5 402.177 46.7682   3
  -4 -14  -6 889.236 67.2433   3
   4  14   6 901.956 64.3634   3
  -4  14  -6 918.044 54.0551   3
   4  14   7 69.5736 21.2561   3
  -4  14  -7 110.499 29.6415   3
  -4 -14  -7 65.9484 23.5545   3
  -4 -14  -8 1636.82 91.3209   3
  -4  14  -8 1768.94 96.7098   3
   4 -14   8 1385.03 54.2632   1
   4  14   8 1584.00 88.1427   3
  -4  14  -9 672.331 61.9786   3
  -4 -14  -9 605.085 59.2660   3
   4  14   9 595.960 55.0153   3
   4 -14   9 471.175 31.7034   1
   4 -14  10 3903.19 83.1851   1
  -4  14 -10 4562.44 155.540   3
   4  14  10 4265.51 145.541   3
  -4 -14 -10 4229.52 146.968   3
   4  14  10 3980.08 88.1661   2
  -4 -14 -11 304.283 45.7818   3
   4  14  11 199.952 20.4136   2
   4 -14  11 228.977 19.9090   1
   4 -14  12 3090.38 60.8207   1
   4  14  12 3079.84 71.1881   2
  -4 -14 -12 3219.84 135.104   3
   4  14  13 161.247 15.9427   2
  -4 -14 -13 180.089 37.1741   3
  -4 -14 -14 257.729 42.3929   3
  -4 -14 -15 60.7402 27.4917   3
  -4 -14 -16 379.631 51.6700   3
  -4 -14 -17 92.9883 31.4990   3
  -4 -14 -18 1215.37 93.9240   3
  -4 -14 -19 46.9632 29.3582   3
  -4 -14 -20 414.378 60.9431   3
  -4 -14 -21 419.780 61.0722   3
  -4 -14 -22 31.9299 28.6350   3
  -4 -14 -23 696.369 78.7127   3
  -4 -14 -24 99.4217 34.2867   3
  -4 -14 -25-76.7111 43.5322   3
  -4 -14 -26 21.4447 30.2062   3
  -4 -14 -27 241.714 53.6940   3
   4 -16 -28 59.2406 35.8730   3
   4 -16 -27 214.077 52.0455   3
   4 -16 -26 755.158 85.8015   3
   4 -16 -25 180.812 47.4746   3
   4 -16 -24 1388.46 109.764   3
   4 -16 -23 47.9568 32.7784   3
   4 -16 -22 72.0705 38.8754   3
   4 -16 -21 99.7489 33.6415   3
   4 -16 -20 176.582 42.7680   3
   4 -16 -19 43.5063 24.7622   3
   4 -16 -18 5.74241 26.4598   3
   4 -16 -17 0.83461 21.1051   3
   4 -16 -16 49.7404 25.4403   3
   4 -16 -15 156.356 36.6478   3
  -4 -16  14 688.293 46.2063   1
   4 -16 -14 719.457 70.4288   3
   4 -16 -13 3195.15 139.177   3
  -4 -16  13 2914.92 96.6831   1
  -4 -16  12 2325.31 86.8624   1
   4 -16 -12 2604.90 124.818   3
  -4 -16  11 1459.26 71.0991   1
   4 -16 -11 1584.22 97.5009   3
  -4 -16  10 733.547 51.6017   1
   4 -16 -10 821.427 71.7001   3
  -4 -16   9 3.96016 13.6078   1
  -4  16   9-1.49347 21.6301   3
   4  16  -9 4.78803 17.9632   3
   4 -16  -9-4.40685 20.5505   3
   4  16  -8 210.621 37.0841   3
  -4  16   8 183.546 32.5903   3
  -4 -16   8 171.670 28.9605   1
   4 -16  -8 205.785 38.8684   3
  -4  16   7 101.988 25.3520   3
   4 -16  -7 135.785 34.6619   3
   4  16  -7 84.1855 24.9778   3
  -4 -16   7 95.7255 25.8700   1
  -4 -16   6 1455.01 86.9851   3
  -4 -16   6 1342.10 73.9778   1
  -4  16   6 1439.13 86.5352   3
   4  16  -6 1617.84 93.7751   3
   4 -16  -6 1519.20 91.7512   3
   4 -16  -5 652.081 61.7238   3
   4  16  -5 625.072 60.0490   3
  -4  16   5 533.648 53.1511   3
  -4 -16   5 590.639 49.3028   1
  -4 -16   5 568.579 55.1858   3
   4  16  -4 727.619 61.6420   3
  -4  16   4 663.200 60.2371   3
  -4 -16   4 627.586 58.5755   3
  -4 -16   4 627.075 52.8831   1
   4 -16  -4 710.905 62.6773   3
   4 -16  -3 52.0638 23.3745   3
   4  16  -3 43.7486 22.4760   3
  -4  16   3 36.8756 18.1276   3
  -4 -16   3 45.4368 22.9592   3
   4 -16  -2-16.4068 27.8826   3
  -4  16   2-8.62232 19.8841   3
  -4 -16   2-29.0121 28.1080   3
   4  16  -2 3.91888 16.3314   3
  -4 -16   1 758.034 64.6395   3
  -4  16   1 666.241 58.5156   3
   4 -16  -1 753.846 63.1305   3
   4  16  -1 720.319 59.9018   3
  -4 -16   0 527.021 54.7729   3
   4  16   0 586.224 55.4049   3
   4 -16   0 464.760 50.4150   3
  -4  16   0 572.643 56.5125   3
   4  16   1 244.721 38.8582   3
  -4 -16  -1 279.733 41.2978   3
  -4  16  -1 325.720 46.3558   3
   4 -16   1 284.678 41.8480   3
   4  16   2 494.032 50.0416   3
  -4 -16  -2 501.303 54.2743   3
   4 -16   2 523.209 54.2206   3
  -4  16  -2 529.945 55.9857   3
   4  16   3 2077.68 102.462   3
   4 -16   3 2063.72 102.518   3
  -4 -16  -3 2247.55 109.386   3
  -4  16  -3 2329.00 113.108   3
   4 -16   4 180.116 33.5001   3
  -4 -16  -4 197.280 37.3961   3
   4  16   4 173.016 32.6895   3
  -4  16  -4 230.958 40.5026   3
  -4  16  -5 209.834 38.3438   3
   4  16   5 218.449 35.5696   3
  -4 -16  -5 193.325 38.3903   3
   4  16   6 86.3354 24.3793   3
  -4  16  -6 115.022 33.0081   3
  -4 -16  -6 82.5505 26.8422   3
  -4 -16  -7 166.931 37.2144   3
   4  16   7 110.022 26.0293   3
  -4  16  -7 120.595 31.2209   3
  -4 -16  -8 97.0720 28.3969   3
   4 -16   8 49.4683 12.0287   1
   4 -16   9 5.59293 14.5028   1
  -4 -16  -9 51.1790 25.1366   3
   4 -16  10 484.412 34.4615   1
  -4 -16 -10 625.498 64.1149   3
  -4 -16 -11 48.1142 26.6559   3
   4 -16  11 9.29720 10.7624   1
   4  16  11 5.28397 9.92787   2
  -4 -16 -12 90.6774 29.2116   3
   4 -16  12 105.016 16.1718   1
   4  16  12 120.928 17.0683   2
  -4 -16 -13 380.234 52.2282   3
   4  16  13 399.633 28.0934   2
   4  16  14 288.902 22.2876   2
  -4 -16 -14 368.774 52.1838   3
  -4 -16 -15-5.31931 27.0931   3
  -4 -16 -16-9.81028 24.1185   3
  -4 -16 -17 142.332 38.0783   3
  -4 -16 -18 46.6710 27.9846   3
  -4 -16 -19 529.088 70.3776   3
  -4 -16 -20 572.893 71.3556   3
  -4 -16 -21 1455.20 113.332   3
  -4 -16 -22 2062.34 135.121   3
  -4 -16 -23 1557.95 120.067   3
  -4 -16 -24 417.208 63.8771   3
  -4 -16 -25 463.914 71.7091   3
   4 -18 -26 738.964 88.4353   3
   4 -18 -25 126.765 49.4565   3
   4 -18 -24 1787.89 131.914   3
   4 -18 -23 219.721 52.0342   3
   4 -18 -22 328.646 56.6513   3
   4 -18 -21 73.9743 31.4435   3
   4 -18 -20 14.5007 29.2631   3
   4 -18 -19 53.2634 26.7416   3
   4 -18 -18-28.9778 29.5364   3
   4 -18 -17 476.248 63.3619   3
   4 -18 -16 155.747 41.7082   3
  -4 -18  15 127.430 19.7861   1
  -4  18  15 151.789 10.9287   2
   4 -18 -15 177.997 44.1982   3
  -4 -18  14-29.2443 20.0528   1
   4 -18 -14 13.3292 24.2147   3
   4 -18 -13 1320.65 97.3656   3
  -4 -18  13 1082.51 63.6792   1
  -4 -18  12 29.5753 18.0583   1
   4 -18 -12 27.0527 25.8884   3
   4 -18 -11 1631.82 106.269   3
  -4 -18  11 1344.65 71.3093   1
  -4 -18  10 139.452 25.3266   1
   4 -18 -10 311.332 51.3152   3
  -4 -18   9 1.17246 15.2269   1
   4 -18  -9 18.0602 24.5030   3
  -4 -18   8 21.1644 16.8919   1
   4 -18  -8 8.16174 23.4628   3
  -4 -18   7 808.012 60.9183   1
   4 -18  -7 872.160 75.5176   3
  -4 -18   6 4.10650 17.4965   1
  -4 -18   6-16.1684 26.3310   3
   4 -18  -6-21.4624 26.2439   3
  -4 -18   5 461.141 48.8614   1
   4 -18  -5 468.374 56.7044   3
  -4 -18   5 478.588 56.3933   3
   4 -18  -4 126.482 34.0211   3
  -4 -18   4 146.366 34.5665   3
  -4 -18   4 156.820 32.1186   1
   4 -18  -3 684.550 67.0402   3
  -4 -18   3 628.829 62.5226   3
   4 -18  -2 1228.19 88.1211   3
  -4 -18   2 1242.87 86.1169   3
  -4 -18   1 720.362 67.4084   3
   4 -18  -1 754.585 70.8831   3
  -4 -18   0 1171.94 83.7884   3
   4 -18   0 1055.05 79.0143   3
  -4 -18  -1 175.815 37.6057   3
   4 -18   1 135.114 32.9313   3
  -4 -18  -2 527.310 60.4462   3
   4 -18   2 422.094 50.4027   3
   4 -18   3 59.4755 26.5356   3
  -4 -18  -3 28.9222 22.9912   3
   4 -18   4 476.454 54.6928   3
  -4 -18  -4 498.529 57.1393   3
  -4 -18  -5 1344.19 92.2069   3
  -4 -18  -6 808.678 72.5039   3
   4 -18   7 1280.98 66.2666   1
  -4 -18  -7 1489.13 98.5258   3
  -4 -18  -8 536.180 62.9941   3
   4 -18   8 354.762 35.1668   1
   4 -18   9 135.081 22.9214   1
  -4 -18  -9 213.817 45.6402   3
  -4 -18 -10 257.841 47.6319   3
   4 -18  10 169.519 27.4830   1
   4 -18  11 441.531 35.0535   1
  -4 -18 -11 514.032 65.3158   3
   4 -18  12 18.7845 13.1430   1
  -4 -18 -12 46.7730 30.0356   3
   4  18  12 25.1096 12.1847   2
   4 -18  13 655.341 37.4416   1
   4  18  13 655.340 38.0060   2
  -4 -18 -13 623.161 69.3169   3
   4  18  14 300.992 24.3625   2
  -4 -18 -14 264.391 51.5741   3
  -4 -18 -15 108.764 35.8081   3
  -4 -18 -16 351.050 57.2815   3
  -4 -18 -17-4.21976 27.2064   3
  -4 -18 -18 192.197 46.4135   3
  -4 -18 -19-17.5437 32.2328   3
  -4 -18 -20 1628.12 119.195   3
  -4 -18 -21 104.633 50.2830   3
  -4 -18 -22 2696.80 158.814   3
  -4 -18 -23 79.3001 43.8110   3
  -4 -18 -24 286.024 59.3858   3
   4 -20 -25 3.55534 29.9846   3
   4 -20 -24 150.272 46.5797   3
   4 -20 -23 88.5056 36.9967   3
   4 -20 -22-36.3765 34.6444   3
   4 -20 -21-35.3494 41.8045   3
   4 -20 -20 418.576 66.1392   3
   4 -20 -19 303.248 53.3381   3
   4 -20 -18 696.868 78.2590   3
   4 -20 -17-12.3641 32.9517   3
  -4 -20  16 294.214 35.4917   1
   4 -20 -16 304.401 56.9792   3
   4 -20 -15-1.36412 29.6046   3
  -4 -20  15 40.2978 15.7318   1
  -4 -20  14-13.6694 20.6549   1
   4 -20 -14-39.8580 33.9032   3
  -4 -20  13 477.259 46.1609   1
   4 -20 -13 576.348 67.4800   3
   4 -20 -12 1099.81 93.0949   3
  -4 -20  12 990.244 67.5444   1
   4 -20 -11 2132.01 127.240   3
  -4 -20  11 1821.01 91.5461   1
  -4 -20  10 1360.31 79.3598   1
   4 -20 -10 1664.26 111.368   3
  -4 -20   9 310.752 40.0401   1
   4 -20  -9 372.038 55.0080   3
   4 -20  -8 68.9284 27.3357   3
  -4 -20   8 92.4651 27.7295   1
   4 -20  -7 27.0642 30.0559   3
  -4 -20   7 62.0536 22.7605   1
  -4 -20   6-0.76353 20.3876   1
   4 -20  -6-38.1722 27.9293   3
  -4 -20   6-62.8510 32.4379   3
   4 -20  -5 149.814 37.4700   3
  -4 -20   5 166.846 34.8734   1
  -4 -20   5 134.050 35.2065   3
  -4 -20   4 48.2249 25.1389   1
   4 -20  -4 14.7099 22.0954   3
  -4 -20   4 18.3706 21.6088   3
  -4 -20   3 119.847 36.5070   1
  -4 -20   3 79.6020 33.5571   3
   4 -20  -3 107.370 35.4597   3
  -4 -20   2 180.602 42.9035   3
   4 -20  -2 174.626 43.3843   3
   4 -20  -1 29.5403 29.2965   3
  -4 -20   1 39.3949 29.1401   3
   4 -20   0 675.119 69.2350   3
  -4 -20   0 665.135 69.2683   3
  -4 -20  -1 91.2390 30.9397   3
   4 -20   1 73.8212 28.4334   3
  -4 -20  -2 561.057 65.6910   3
   4 -20   2 509.621 58.7101   3
  -4 -20  -3-63.2049 37.6775   3
   4 -20   3-40.0053 29.5765   3
  -4 -20  -4-8.95495 27.0585   3
   4 -20   4-14.0974 28.8669   3
  -4 -20  -5 243.431 42.6899   3
  -4 -20  -6 423.611 57.0559   3
   4 -20   7 4.65927 15.9616   1
  -4 -20  -7 2.44181 25.4042   3
   4 -20   8 310.627 36.2465   1
  -4 -20  -8 440.957 63.4157   3
   4 -20   9 315.191 36.0243   1
  -4 -20  -9 500.988 67.2408   3
   4 -20  10 233.541 29.6423   1
  -4 -20 -10 360.373 57.5296   3
  -4 -20 -11-2.90067 32.9713   3
   4 -20  11-6.19155 15.0144   1
   4 -20  12 57.0132 17.1736   1
  -4 -20 -12 9.09815 30.4293   3
   4  20  13 111.563 19.3105   2
  -4 -20 -13 92.7980 26.4844   3
   4 -20  13 119.253 20.4385   1
  -4 -20 -14 224.367 45.9516   3
  -4 -20 -15 91.8274 32.4479   3
  -4 -20 -16 275.993 52.4794   3
  -4 -20 -17 187.922 46.1310   3
  -4 -20 -18 34.5946 31.4284   3
  -4 -20 -19 0.99725 27.4308   3
  -4 -20 -20 109.709 37.5172   3
  -4 -20 -21 200.954 53.1708   3
  -4 -20 -22 139.966 40.0778   3
   4 -22 -22-13.9802 34.7054   3
   4 -22 -21-7.45586 35.4697   3
   4 -22 -20-45.5172 43.3519   3
   4 -22 -19 517.901 72.7894   3
   4 -22 -18 40.3331 34.1126   3
   4 -22 -17 117.446 40.6646   3
   4 -22 -16 372.512 61.1460   3
   4 -22 -15 47.5712 31.5511   3
  -4 -22  14 33.5864 19.6678   1
   4 -22 -14 13.6293 26.3811   3
   4 -22 -13 194.749 44.8667   3
  -4 -22  13 231.191 37.2351   1
   4 -22 -12 859.195 86.8079   3
  -4 -22  12 771.111 63.3397   1
   4 -22 -11 92.9085 39.3215   3
  -4 -22  11 60.5567 24.3264   1
   4 -22 -10 2787.66 150.483   3
  -4 -22  10 2275.80 109.290   1
   4 -22  -9 87.0646 33.2997   3
  -4 -22   9 44.9403 24.1309   1
   4 -22  -8 1481.00 109.166   3
   4 -22  -7 25.3908 27.7057   3
   4 -22  -6 1084.96 92.8640   3
  -4 -22   6 878.968 80.6308   3
   4 -22  -5 187.719 42.7179   3
  -4 -22   5 127.891 33.2431   3
  -4 -22   4 1236.37 94.9353   3
   4 -22  -4 1447.10 105.873   3
  -4 -22   3-11.1751 26.7625   3
   4 -22  -3 19.0346 29.9356   3
  -4 -22   2 2663.50 138.129   3
   4 -22  -2 2706.17 142.064   3
   4 -22  -1 1415.37 103.827   3
  -4 -22   1 1467.85 106.171   3
  -4 -22   0 2565.18 137.941   3
   4 -22   0 2517.27 133.712   3
   4 -22   1 1535.67 105.834   3
  -4 -22  -1 1500.24 107.003   3
   4 -22   2 936.245 82.8131   3
  -4 -22  -2 951.659 87.9377   3
   4 -22   3 857.866 78.2284   3
  -4 -22  -3 961.969 86.7265   3
   4 -22   4-72.0950 43.5333   3
  -4 -22  -4-0.03469 33.3610   3
  -4 -22  -5 339.788 55.3335   3
  -4 -22  -6 69.0422 33.6999   3
  -4 -22  -7 72.7899 33.4497   3
   4 -22   7 94.7347 27.7544   1
   4 -22   8 14.3000 19.2948   1
  -4 -22  -8 64.4000 35.1420   3
  -4 -22  -9 439.277 63.1204   3
   4 -22   9 400.434 44.3031   1
  -4 -22 -10-25.4935 29.0432   3
   4 -22  10-27.9456 21.2828   1
  -4 -22 -11 149.114 44.3978   3
  -4 -22 -12 18.3163 29.6643   3
  -4 -22 -13 43.3721 30.2179   3
  -4 -22 -14 248.805 52.8805   3
  -4 -22 -15-42.9667 33.1030   3
  -4 -22 -16 503.084 72.1773   3
  -4 -22 -17 58.8724 36.3367   3
  -4 -22 -18-23.9218 34.2496   3
  -4 -22 -19-53.5121 39.5873   3
  -4 -22 -20 25.1070 36.1811   3
   4 -24 -20 125.405 45.7629   3
   4 -24 -19-104.883 49.8593   3
   4 -24 -18 26.8274 28.9080   3
   4 -24 -17-16.4647 41.7965   3
   4 -24 -16 846.393 98.0529   3
   4 -24 -15 123.686 48.7739   3
   4 -24 -14 1856.10 134.428   3
   4 -24 -13 228.304 54.7148   3
   4 -24 -12 656.003 81.5192   3
   4 -24 -11 429.154 68.5753   3
   4 -24 -10 1.80177 27.0482   3
   4 -24  -9 121.011 38.0631   3
   4 -24  -8 339.943 58.7571   3
   4 -24  -7 163.675 46.9773   3
  -4 -24   6 1086.62 97.5008   3
   4 -24  -6 1274.70 105.595   3
   4 -24  -5 455.844 65.3574   3
  -4 -24   5 382.445 60.0271   3
   4 -24  -4 1385.59 110.454   3
  -4 -24   4 1399.79 105.280   3
   4 -24  -3-12.9774 31.5636   3
  -4 -24   3-14.7676 31.7538   3
   4 -24  -2 512.667 68.5059   3
  -4 -24   2 610.016 71.9084   3
  -4 -24   1 623.605 74.2429   3
   4 -24  -1 587.565 71.8671   3
   4 -24   0 16.6645 24.7706   3
  -4 -24   0-2.51937 25.5742   3
   4 -24   1 578.062 71.8175   3
  -4 -24  -1 642.332 78.4233   3
   4 -24   2 711.588 77.3658   3
  -4 -24  -2 697.137 80.4269   3
   4 -24   3 107.727 35.6242   3
  -4 -24  -3 191.489 46.9804   3
  -4 -24  -4 1740.24 121.975   3
   4 -24   4 1450.90 110.372   3
  -4 -24  -5 23.6406 29.2731   3
  -4 -24  -6 537.539 72.2510   3
   4 -24   7 259.008 45.4209   1
  -4 -24  -7 206.210 49.3105   3
  -4 -24  -8 8.26285 28.6143   3
  -4 -24  -9 469.052 69.8108   3
  -4 -24 -10 414.429 69.5293   3
  -4 -24 -11 254.842 55.5036   3
  -4 -24 -12 1036.51 103.846   3
  -4 -24 -13 18.7697 35.3797   3
  -4 -24 -14 179.127 51.6759   3
  -4 -24 -15 26.5382 33.4233   3
  -4 -24 -16-34.6099 38.4749   3
  -4 -24 -17-0.94775 35.4342   3
  -4 -24 -18 208.261 51.6610   3
   4 -26 -17 71.8431 32.6243   3
   4 -26 -16 415.512 72.1625   3
   4 -26 -15 85.2929 48.2960   3
   4 -26 -14 2073.61 148.929   3
   4 -26 -13 504.534 79.2867   3
   4 -26 -12 1473.73 126.395   3
   4 -26 -11 321.444 59.0686   3
   4 -26 -10 110.580 41.9887   3
   4 -26  -9 46.6399 32.7921   3
   4 -26  -8 91.5677 37.3053   3
   4 -26  -7 57.9677 32.9831   3
  -4 -26   6 828.983 88.3837   3
   4 -26  -6 1008.79 98.6065   3
   4 -26  -5 69.5496 34.2322   3
  -4 -26   5 32.8571 30.8871   3
  -4 -26   4 660.735 80.2452   3
   4 -26  -4 845.616 91.4615   3
   4 -26  -3 42.2195 33.0544   3
  -4 -26   3 14.3800 29.7471   3
  -4 -26   2-2.97374 30.7456   3
   4 -26  -2 3.15805 34.1223   3
   4 -26  -1-22.9709 33.1531   3
  -4 -26   1-37.1674 33.7534   3
  -4 -26   0 268.988 54.6025   3
   4 -26   0 344.219 60.7396   3
   4 -26   1 1.81034 33.6256   3
  -4 -26  -1 46.1124 33.5614   3
   4 -26   2 1037.68 101.025   3
  -4 -26  -2 1030.60 102.548   3
  -4 -26  -3 381.822 64.7914   3
   4 -26   3 304.931 57.7231   3
  -4 -26  -4 1063.83 102.087   3
  -4 -26  -5 102.185 37.3373   3
  -4 -26  -6 177.662 48.8685   3
  -4 -26  -7-30.1439 44.9985   3
  -4 -26  -8-16.1036 36.3656   3
  -4 -26  -9-43.0765 34.9018   3
  -4 -26 -10 100.109 44.4232   3
  -4 -26 -11 357.995 68.6067   3
  -4 -26 -12 594.974 84.7085   3
  -4 -26 -13 173.208 52.6375   3
  -4 -26 -14 100.826 43.8344   3
  -4 -26 -15 49.0745 32.5493   3
   4 -28 -13 602.833 83.4616   3
   4 -28 -12-5.00128 35.2005   3
   4 -28 -11 550.608 82.2338   3
   4 -28 -10 102.998 48.3882   3
   4 -28  -9 54.8803 35.9706   3
   4 -28  -8 255.066 57.2493   3
   4 -28  -7 67.9668 49.7775   3
   4 -28  -6 240.035 56.8018   3
  -4 -28   5 126.097 45.9264   3
   4 -28  -5 157.766 49.3894   3
  -4 -28   4 110.373 42.2321   3
   4 -28  -4 57.3154 37.7898   3
  -4 -28   3 132.843 42.8024   3
   4 -28  -3 143.281 48.4478   3
   4 -28  -2 29.4600 32.1464   3
  -4 -28   2 28.9803 35.3700   3
  -4 -28   1 21.9788 34.5365   3
   4 -28  -1-44.3325 37.5930   3
   4 -28   0-4.84412 39.4666   3
  -4 -28   0 44.2129 33.0729   3
  -4 -28  -1 104.245 44.5767   3
   4 -28   1 113.411 38.8647   3
  -4 -28  -2 54.3710 36.8737   3
   4 -28   2 53.7870 33.7283   3
   4 -28   3 43.0574 33.0418   3
  -4 -28  -3 105.706 36.5923   3
  -4 -28  -4 36.6981 31.2986   3
  -4 -28  -5 98.7261 40.7200   3
  -4 -28  -6 199.887 55.5633   3
  -4 -28  -7 795.076 95.6042   3
  -4 -28  -8-18.8362 29.7497   3
  -4 -28  -9 511.666 80.2003   3
  -4 -28 -10 14.7132 35.3141   3
  -4 -30   5-51.2545 38.9115   3
   4 -30  -4 48.1711 35.8035   3
  -4 -30   4 19.0839 32.3135   3
   4 -30  -3 35.8085 36.3952   3
  -4 -30   3 7.44967 33.9933   3
   4 -30  -2 72.7335 35.9983   3
  -4 -30   2 72.8618 40.3190   3
   4 -30  -1 152.444 52.4272   3
  -4 -30   1 13.8302 28.5175   3
  -4 -30   0 5.59639 33.4745   3
   4 -30   0 24.2577 36.2745   3
  -4 -30  -1 16.5789 30.7336   3
   4 -30   1-18.9253 32.0531   3
  -4 -30  -2-0.82142 30.9365   3
   4 -30   2 9.95257 32.6191   3
   5   1 -33-9.73051 26.3877   3
   5  -1 -33-11.3862 32.2104   3
   5  -1 -32 270.991 53.7435   3
   5   1 -32 284.814 54.2206   3
   5  -1 -31 46.0845 29.2378   3
   5   1 -31-6.78384 26.9588   3
   5  -1 -30-3.47353 24.4938   3
   5   1 -30 1.90970 29.4004   3
   5  -1 -29 232.371 50.2946   3
   5   1 -29 271.656 50.0388   3
   5  -1 -28 11.2121 23.5641   3
   5   1 -28 17.7895 23.1033   3
   5   1 -27 789.597 76.7575   3
   5  -1 -27 657.297 71.0673   3
   5  -1 -26 104.218 36.2361   3
   5   1 -26 85.7064 33.7639   3
   5  -1 -25 504.400 60.8100   3
   5   1 -25 510.591 59.8949   3
   5  -1 -24 24.3037 22.0791   3
   5   1 -24 4.65114 23.4965   3
   5   1 -23 438.993 53.0779   3
   5  -1 -23 404.210 50.1247   3
   5  -1 -22 426.492 51.3800   3
   5   1 -22 444.680 50.5238   3
   5  -1 -21-0.23009 24.2358   3
   5   1 -21 31.3810 21.0870   3
   5   1 -20 668.011 59.2995   3
   5  -1 -20 711.462 60.1963   3
   5  -1 -19 463.853 47.9729   3
   5   1 -19 477.998 50.2727   3
   5  -1 -18-15.8597 18.3140   3
   5   1 -18-10.3038 18.3651   3
   5  -1 -17 181.277 29.3066   3
   5   1 -17 204.454 35.1442   3
   5   1 -16 153.620 30.3063   3
   5  -1 -16 125.959 26.0094   3
   5   1 -15 15.7789 19.9820   3
   5  -1 -15-4.62497 17.2816   3
   5  -1 -14 1316.98 65.1980   3
   5   1 -14 1293.67 64.4533   3
   5   1 -13 107.894 23.8888   3
   5  -1 -13 97.7194 22.9592   3
   5  -1 -12 45.0655 20.3282   3
   5   1 -12 2.68546 16.0187   3
   5   1 -11 1137.86 53.5264   3
   5  -1 -11 1072.23 52.3212   3
   5  -1 -10 3101.96 82.3437   3
   5  -1  -9 634.451 36.5760   3
  -5   1   8 2496.56 66.8285   3
   5  -1  -8 2414.89 63.0210   3
  -5   1   7 1450.66 45.6686   3
   5  -1  -7 1487.24 46.8045   3
   5  -1  -6 210.571 17.9335   3
  -5   1   6 220.369 18.2872   3
  -5   1   5 81.1224 11.2098   3
   5  -1  -5 92.9089 12.4597   3
   5  -1  -4 358.596 17.9809   2
   5  -1  -4 369.284 17.0222   3
  -5   1   4 357.530 16.8144   3
   5  -1  -3 170.366 14.1981   2
   5  -1  -3 203.374 10.9235   3
  -5   1   3 175.533 10.2303   3
  -5   1   3 185.021 13.3033   2
   5  -1  -2 523.283 20.8776   2
   5   1  -2 520.139 22.7021   1
  -5   1   2 527.073 21.5925   2
  -5  -1   1 615.396 24.3152   1
   5   1  -1 585.867 24.3660   2
   5   1  -1 608.160 23.7484   1
  -5   1   1 589.413 24.1213   2
   5   1   0 371.884 20.6322   2
  -5  -1   0 343.909 19.9271   1
   5   1   0 351.713 19.2166   1
  -5  -1   0 349.269 19.7324   2
  -5  -1  -1 127.581 13.6294   1
  -5  -1  -1 158.923 15.1579   2
   5   1   1 145.225 14.2942   2
  -5  -1  -1 153.627 12.2230   3
   5   1   1 139.138 11.0288   3
   5   1   1 126.702 11.5762   1
   5  -1   1 151.695 11.6528   1
   5   1   2 88.1628 14.5543   2
  -5  -1  -2 78.2054 10.7907   3
  -5  -1  -2 102.678 14.2782   2
   5  -1   2 74.6997 9.08830   1
   5   1   2 94.0071 11.2252   3
  -5  -1  -2 104.829 14.3856   1
  -5   1  -2 89.3264 9.69159   1
  -5   1  -3 354.938 15.9575   1
   5  -1   3 372.094 17.1559   1
  -5  -1  -3 403.158 23.6239   1
  -5  -1  -3 372.065 22.9636   2
  -5  -1  -3 359.948 21.8085   3
   5   1   3 343.816 21.2481   3
  -5   1  -4 61.6569 8.91463   1
   5   1   4 65.2584 13.6934   3
  -5  -1  -4 67.2024 14.2030   3
  -5  -1  -5 965.188 41.6277   3
  -5   1  -5 1030.70 27.7407   1
   5   1   5 1040.07 42.8664   3
  -5  -1  -6 174.233 22.9118   3
  -5  -1  -7 518.983 35.9027   3
  -5  -1  -8 1438.35 60.4299   3
  -5   1  -8 340.404 41.7177   3
  -5  -1  -9 393.420 34.7720   3
  -5   1  -9 381.843 37.0546   3
  -5   1 -10 477.929 40.1920   3
  -5  -1 -10 460.839 38.6187   3
  -5   1 -11 513.553 43.0286   3
  -5  -1 -11 520.825 42.9449   3
  -5   1 -12 177.530 28.7919   3
  -5  -1 -12 167.017 28.0737   3
  -5   1 -13 26.5251 21.4848   3
  -5  -1 -13 43.9458 18.3990   3
  -5  -1 -14-7.41467 20.3198   3
  -5   1 -14 22.3692 21.6774   3
  -5   1 -15 341.218 42.1233   3
  -5  -1 -15 312.201 38.4536   3
  -5   1 -16 91.3474 27.2931   3
  -5  -1 -16 49.5961 23.8024   3
  -5  -1 -17 830.835 65.5478   3
  -5   1 -17 865.848 66.3701   3
  -5  -1 -18 1451.40 85.7419   3
  -5   1 -18 1559.72 89.5099   3
  -5   1 -19 243.757 39.1749   3
  -5  -1 -19 241.397 37.8125   3
  -5  -1 -20 104.379 26.5676   3
  -5   1 -20 120.579 32.2799   3
  -5   1 -21 36.7877 23.8270   3
  -5  -1 -21 5.58256 21.4562   3
  -5   1 -22 4110.44 161.458   3
  -5  -1 -22 4074.06 160.281   3
  -5  -1 -23 380.908 55.1549   3
  -5   1 -23 431.675 60.7826   3
  -5  -1 -24 3280.68 151.016   3
  -5   1 -24 3343.70 154.787   3
  -5   1 -25 160.260 40.6990   3
  -5  -1 -25 162.837 44.9666   3
  -5   1 -26 13.6191 25.3837   3
  -5  -1 -26 9.94261 24.2912   3
  -5   1 -27-27.2131 27.6924   3
  -5  -1 -27 9.64053 30.2641   3
  -5  -1 -28-4.20812 23.7091   3
  -5   1 -28 6.96654 25.3400   3
  -5  -1 -29 141.976 43.0395   3
  -5   1 -29 150.295 41.5981   3
  -5   1 -30 682.522 83.2385   3
  -5  -1 -30 563.824 75.4593   3
   5   3 -33 239.561 56.5054   3
   5  -3 -33 234.175 54.1281   3
   5   3 -32 22.4447 30.3752   3
   5  -3 -32 88.1120 39.5708   3
   5   3 -31 137.612 40.9532   3
   5  -3 -31 113.792 41.5540   3
   5   3 -30 226.789 48.1980   3
   5  -3 -30 236.061 49.4141   3
   5   3 -29 3.38691 26.6187   3
   5  -3 -29 48.8568 24.4046   3
   5  -3 -28 99.6163 31.8505   3
   5   3 -28 68.9735 25.3249   3
   5  -3 -27 202.675 41.6272   3
   5   3 -27 216.067 45.3040   3
   5  -3 -26 108.554 34.6577   3
   5   3 -26 69.6666 28.6502   3
   5  -3 -25 82.0138 30.8250   3
   5   3 -25 45.3831 25.1674   3
   5  -3 -24 81.9548 30.2078   3
   5   3 -24 37.3329 25.6100   3
   5   3 -23 417.222 52.3425   3
   5  -3 -23 424.090 52.7190   3
   5  -3 -22 100.055 31.3808   3
   5   3 -22 129.765 35.5877   3
   5  -3 -21 867.911 70.1047   3
   5   3 -21 852.053 68.4036   3
   5   3 -20 1781.75 93.4891   3
   5  -3 -20 1667.48 91.3016   3
   5  -3 -19-12.9796 21.7468   3
   5   3 -19 62.3882 26.4469   3
   5  -3 -18 374.738 44.2377   3
   5   3 -18 377.935 45.1034   3
   5  -3 -17 556.516 49.9751   3
   5  -3 -16 285.167 36.1061   3
   5  -3 -15 1826.02 80.6588   3
   5  -3 -14 1651.39 74.1860   3
  -5   3  14 1661.41 74.2326   3
   5  -3 -13 522.549 41.5544   3
  -5   3  13 520.249 42.2973   3
  -5   3  12 796.768 48.3436   3
   5  -3 -12 838.158 50.0123   3
   5  -3 -11 602.905 42.0329   3
  -5   3  11 621.587 41.3676   3
  -5   3  10 76.3031 16.9151   3
   5  -3 -10 83.3049 22.2299   3
  -5   3   9 600.263 36.7922   3
   5  -3  -9 669.381 39.4270   3
   5  -3  -8 200.896 23.4229   3
  -5   3   8 173.758 20.6023   3
   5  -3  -8 176.831 11.3801   2
   5  -3  -7 22.0794 14.3804   3
  -5   3   7 15.1787 11.9032   3
   5  -3  -7 21.3864 7.09415   2
   5  -3  -6-2.32731 12.7315   3
   5  -3  -6 2.11907 6.64411   2
  -5   3   6-0.32558 10.9109   3
   5   3  -6-3.30520 10.7608   1
   5  -3  -5 122.988 17.1926   3
  -5   3   5 113.258 14.6729   3
   5   3  -5 116.144 16.5787   1
  -5   3   5 132.728 11.5744   2
  -5  -3   4 91.3661 15.8834   1
  -5   3   4 66.9916 11.8671   3
  -5   3   4 73.0842 10.8354   2
   5   3  -4 76.6965 14.8612   1
   5  -3  -4 57.5466 12.1175   3
   5   3  -3 175.244 15.0377   3
  -5  -3   3 188.935 16.1557   3
  -5   3   3 169.228 14.6069   3
  -5  -3   3 185.879 18.7491   1
   5  -3  -3 184.305 16.2649   3
   5   3  -3 158.995 17.0022   1
   5   3  -2 67.0770 11.4047   3
  -5  -3   2 86.3451 14.5149   1
   5  -3  -2 94.4912 13.1663   3
   5   3  -2 98.4709 15.7520   1
  -5   3   2 90.5580 11.9143   3
  -5  -3   2 82.1147 12.2738   3
  -5  -3   1 0.59309 12.5126   1
  -5  -3   1 4.25507 10.1182   3
   5  -3  -1 18.2525 10.2567   3
  -5   3   1 9.14973 8.73110   3
   5   3  -1 16.7239 8.85216   3
   5   3  -1 37.1298 14.2338   1
   5   3   0 329.759 18.7684   3
   5   3   0 356.484 28.4418   1
  -5   3   0 313.270 19.5440   3
  -5  -3   0 302.369 23.1070   1
   5  -3   0 334.034 19.5079   3
  -5  -3   0 344.909 20.0640   3
  -5   3  -1 13.9576 10.0398   3
   5   3   1 24.6815 10.3037   3
  -5  -3  -1 14.6103 10.4656   3
  -5  -3  -1 44.3550 16.7770   1
  -5  -3  -2 12.3141 11.7771   3
   5   3   2 11.1501 10.5034   2
   5   3   2 13.1091 9.58727   3
  -5  -3  -3 246.570 21.7008   3
   5   3   3 254.847 19.9880   2
   5   3   3 263.508 20.5811   3
  -5  -3  -3 273.151 19.5740   2
  -5  -3  -4 327.939 20.9464   2
   5   3   4 347.005 22.3676   2
  -5  -3  -4 369.019 27.5378   3
   5   3   4 374.482 26.9165   3
  -5  -3  -5 255.126 20.1984   2
   5   3   5 248.025 23.4579   3
  -5  -3  -5 254.386 25.8564   3
  -5  -3  -6 338.141 22.6754   2
   5   3   6 330.474 27.6937   3
  -5  -3  -6 324.772 29.3260   3
  -5  -3  -7 151.784 17.2688   2
   5   3   7 141.918 22.1705   3
  -5  -3  -7 133.624 23.1275   3
  -5  -3  -8 2945.63 65.0309   2
   5   3   8 3107.43 87.9730   3
  -5  -3  -8 2961.55 87.5689   3
  -5  -3  -9 447.491 27.9951   2
  -5  -3  -9 443.403 37.9965   3
   5   3   9 427.507 35.8579   3
   5   3  10 142.965 26.3184   3
  -5  -3 -10 108.895 23.1594   3
  -5  -3 -10 109.042 16.1044   2
   5   3  11 73.9076 18.8279   3
  -5  -3 -11 59.9218 21.3335   3
  -5  -3 -11 64.5219 14.2074   2
  -5  -3 -12 2046.03 85.9030   3
  -5  -3 -13 42.3773 19.9696   3
  -5  -3 -14 405.263 41.3254   3
  -5  -3 -15 296.587 39.1256   3
  -5   3 -15 323.569 43.8455   3
  -5  -3 -16 25.8890 18.8434   3
  -5   3 -16 36.5571 26.3883   3
  -5  -3 -17 2721.43 114.650   3
  -5   3 -17 2762.83 116.472   3
  -5  -3 -18 939.857 73.0653   3
  -5   3 -18 1032.88 77.4971   3
  -5   3 -19 2025.06 104.562   3
  -5  -3 -19 1846.98 101.539   3
  -5   3 -20 863.084 73.3260   3
  -5  -3 -20 832.664 70.4046   3
  -5   3 -21 50.1674 26.7243   3
  -5  -3 -21 21.1341 22.0266   3
  -5  -3 -22 213.013 44.8788   3
  -5  -3 -22 261.113 31.5071   2
  -5   3 -22 222.422 43.0295   3
  -5   3 -23 1176.40 90.0185   3
  -5  -3 -23 1127.96 89.7529   3
  -5  -3 -23 1120.45 59.7411   2
  -5  -3 -24 330.106 54.5450   3
  -5   3 -24 287.263 48.5333   3
  -5  -3 -24 278.165 32.4556   2
  -5  -3 -25-26.4088 29.9680   3
  -5  -3 -25 45.9373 17.9119   2
  -5   3 -25 62.4479 33.6138   3
  -5   3 -26 35.1247 30.4700   3
  -5  -3 -26 36.5465 16.8960   2
  -5  -3 -26-37.6775 32.3851   3
  -5   3 -27 223.461 47.5288   3
  -5  -3 -27 194.524 45.5677   3
  -5   3 -28 24.8264 27.7938   3
  -5  -3 -28 57.1142 39.1848   3
  -5  -3 -29 56.5085 31.4889   3
  -5   3 -29 91.2046 34.7735   3
  -5   3 -30 218.107 52.1222   3
  -5  -3 -30 217.253 52.7133   3
   5   5 -32 2906.17 167.410   3
   5  -5 -32 2843.42 164.401   3
   5  -5 -31 143.580 50.0887   3
   5   5 -31 176.379 51.3619   3
   5  -5 -30 3236.71 166.899   3
   5   5 -30 3165.52 165.030   3
   5   5 -29 61.2806 35.5025   3
   5  -5 -29 74.5364 39.0396   3
   5  -5 -28 245.441 46.9959   3
   5   5 -28 299.327 51.4095   3
   5  -5 -27 5.11160 22.6810   3
   5   5 -27 24.5360 25.1870   3
   5  -5 -26 1161.41 92.2901   3
   5   5 -26 1305.70 95.5693   3
   5  -5 -25 75.7330 35.3670   3
   5   5 -25 80.8575 38.0583   3
   5   5 -24 5205.12 181.360   3
   5  -5 -24 5180.34 179.319   3
   5   5 -23 826.204 74.1082   3
   5  -5 -23 729.086 71.2412   3
   5  -5 -22 3088.58 134.221   3
   5   5 -22 2957.92 130.514   3
   5  -5 -21 527.290 56.0032   3
   5  -5 -20 170.392 33.1370   3
  -5   5  19 39.4189 32.6446   3
   5  -5 -19 86.1076 26.0676   3
  -5   5  18 358.632 43.8479   3
   5  -5 -18 313.407 40.7693   3
   5  -5 -17 73.7753 22.0178   3
  -5   5  17 55.4454 20.3838   3
  -5   5  16 598.438 50.4648   3
   5  -5 -16 606.276 50.9423   3
   5  -5 -15 648.978 50.5730   3
  -5   5  15 700.602 52.6117   3
  -5   5  14 132.527 25.5051   3
   5  -5 -14 137.110 26.5059   3
  -5   5  13 733.006 49.3914   3
   5  -5 -13 689.428 49.1760   3
   5   5 -13 703.532 37.1250   1
   5   5 -12 52.6380 13.3658   1
  -5   5  12 43.8563 16.2556   3
   5  -5 -12 43.7877 17.3428   3
   5  -5 -11 112.717 22.8927   3
  -5   5  11 132.733 22.8248   3
   5   5 -11 106.390 16.3840   1
   5   5 -10 89.5974 16.1459   1
  -5   5  10 65.1530 17.3720   3
   5  -5 -10 96.8385 21.5501   3
   5  -5  -9-0.29049 16.4576   3
   5   5  -9 3.97382 11.6561   1
  -5   5   9 7.11988 13.3808   3
   5   5  -8 79.5765 15.0459   1
   5  -5  -8 82.9017 19.9447   3
  -5   5   8 89.0599 19.1457   3
   5   5  -7 460.490 27.9233   1
  -5   5   7 440.572 30.7540   3
  -5   5   7 466.166 16.6660   2
  -5  -5   7 482.031 28.8569   1
   5  -5  -7 444.758 33.1509   3
  -5   5   6 273.225 25.1423   3
   5   5  -6 242.711 22.2023   1
   5  -5  -6 262.622 25.8048   3
  -5  -5   6 233.775 22.3555   1
   5  -5  -5 2159.66 60.3277   3
  -5   5   5 2122.41 58.9273   3
   5   5  -5 2189.35 61.4610   3
  -5  -5   5 2169.32 57.9074   1
   5   5  -5 2205.40 59.1918   1
  -5  -5   4 155.128 20.4220   1
  -5   5   4 159.818 18.1312   3
   5  -5  -4 165.615 21.4231   3
  -5  -5   4 161.719 20.8005   3
   5   5  -4 160.740 18.7632   3
   5   5  -4 179.462 21.2589   1
  -5  -5   3 15.5407 13.4392   1
  -5   5   3-2.82955 11.6493   3
   5   5  -3 45.0245 18.9868   1
  -5  -5   3 11.0359 13.7928   3
   5   5  -3 22.8460 13.6319   3
   5  -5  -3 11.2625 14.8854   3
  -5   5   2 28.0959 13.6884   3
  -5  -5   2 44.2898 15.8281   3
  -5  -5   2 47.5571 16.0583   1
   5   5  -2 40.9195 14.5767   3
   5  -5  -2 26.8001 14.1949   3
   5   5  -2 147.791 25.2068   1
   5   5  -1 100.350 17.4063   3
  -5  -5   1 119.234 19.8385   3
  -5  -5   1 137.148 21.2241   1
   5  -5  -1 116.962 19.0574   3
  -5   5   1 110.373 18.1087   3
  -5  -5   0 874.081 42.6543   1
   5  -5   0 779.354 36.1334   3
  -5  -5   0 794.971 37.8360   3
  -5   5   0 763.094 36.2405   3
   5   5   0 776.390 35.8736   3
   5  -5   1 674.559 34.1917   3
  -5   5  -1 675.583 34.9717   3
   5   5   1 666.854 33.6928   3
  -5  -5  -1 680.195 36.1350   3
  -5  -5  -2 1141.73 44.7947   3
  -5   5  -2 1113.46 43.4550   3
   5   5   2 1102.74 43.8095   3
  -5  -5  -3 339.278 27.3073   3
   5   5   3 324.555 26.5400   3
  -5  -5  -4 276.750 27.3217   3
   5   5   4 262.824 24.5451   3
   5   5   4 280.432 20.8595   2
   5   5   5 25.4959 10.9619   2
   5   5   5 24.8856 14.2551   3
  -5  -5  -5 47.3713 18.1963   3
  -5  -5  -6-4.56688 16.0974   3
   5   5   6-13.0893 13.5156   3
   5   5   6 0.28108 9.92548   2
  -5  -5  -7 7.01287 16.3697   3
   5   5   7-8.97017 14.3279   3
   5   5   8 419.133 35.2898   3
  -5  -5  -8 495.359 39.1044   3
  -5  -5  -8 436.163 25.1207   2
  -5  -5  -9 180.465 28.4299   3
   5   5   9 165.220 25.2031   3
  -5  -5  -9 161.255 16.0134   2
   5   5  10 231.029 30.2943   3
  -5  -5 -10 222.862 19.5248   2
  -5  -5 -10 214.523 30.0976   3
  -5  -5 -11 34.5226 11.1501   2
  -5  -5 -11 15.9979 16.1130   3
   5   5  11 31.6002 15.9176   3
  -5  -5 -12 3747.47 77.7900   2
  -5  -5 -12 3718.30 115.968   3
   5   5  12 3910.63 119.506   3
  -5  -5 -13 113.574 15.8070   2
   5   5  13 142.215 28.9143   3
  -5  -5 -13 81.3120 24.4284   3
  -5  -5 -14 1982.26 59.0743   2
  -5  -5 -14 1984.36 92.3638   3
   5   5  14 2119.61 94.1456   3
   5   5  15 11.1638 19.5022   3
  -5  -5 -15-20.2765 20.8768   3
  -5  -5 -15-6.25364 9.49679   2
  -5  -5 -16 60.9738 13.3282   2
   5   5  16 50.2499 18.2484   3
  -5  -5 -16 70.5844 23.9967   3
  -5  -5 -17 630.132 37.8615   2
  -5  -5 -17 669.548 59.8506   3
  -5  -5 -18 748.117 64.4907   3
  -5  -5 -18 708.048 40.7818   2
  -5   5 -19 1409.92 91.9933   3
  -5  -5 -19 1333.06 87.1354   3
  -5  -5 -19 1224.36 53.9319   2
  -5   5 -20 1594.99 99.3268   3
  -5  -5 -20 1268.50 56.6267   2
  -5  -5 -20 1419.61 93.6142   3
  -5   5 -21 195.274 42.6309   3
  -5  -5 -21 174.731 40.3187   3
  -5  -5 -21 147.587 22.7158   2
  -5  -5 -22 277.418 49.8064   3
  -5  -5 -22 181.970 23.8793   2
  -5   5 -22 219.318 15.1570   1
  -5   5 -22 129.734 8.76860   1
  -5   5 -22 196.575 42.4929   3
  -5  -5 -23 5.14527 23.8911   3
  -5   5 -23 0.48405 23.7864   3
  -5  -5 -23 16.5295 12.8636   2
  -5   5 -23-19.4707 7.70455   1
  -5  -5 -24 19.5492 12.4142   2
  -5   5 -24 12.3901 24.4396   3
  -5  -5 -24 25.1717 27.3581   3
  -5  -5 -25-4.73052 26.2733   3
  -5  -5 -25 20.0279 13.0636   2
  -5   5 -25 4.79165 25.7739   3
  -5   5 -26 46.9110 29.6646   3
  -5  -5 -26 36.1598 27.0087   3
  -5   5 -27 205.510 48.6529   3
  -5  -5 -27 141.798 44.6583   3
  -5   5 -28 848.589 91.5597   3
  -5  -5 -28 940.629 93.8576   3
  -5   5 -29 58.1721 37.9206   3
  -5  -5 -29 53.1036 40.7621   3
  -5   5 -30 632.796 81.3454   3
  -5  -5 -30 657.194 83.2744   3
   5  -7 -32 789.214 91.3290   3
   5   7 -32 789.571 91.9171   3
   5  -7 -31 1367.46 113.148   3
   5   7 -31 1400.75 115.047   3
   5   7 -30 938.072 94.1912   3
   5  -7 -30 925.869 91.5542   3
   5   7 -29 71.4390 34.5176   3
   5  -7 -29 62.2360 33.0446   3
   5  -7 -28 12.8878 22.7145   3
   5   7 -28 46.6100 29.4313   3
   5  -7 -27 77.7370 33.2807   3
   5   7 -27 78.5437 18.3474   1
   5   7 -27 128.088 39.0482   3
   5   7 -26 556.951 41.5533   1
   5  -7 -26 640.224 70.2649   3
   5   7 -26 584.237 66.5112   3
   5   7 -25 203.525 42.4763   3
   5   7 -25 159.246 25.4547   1
   5  -7 -25 186.178 41.0588   3
   5  -7 -24 3604.99 151.779   3
   5   7 -24 3638.70 101.796   1
   5  -7 -23 242.474 44.2949   3
   5   7 -23 274.614 28.7971   1
   5  -7 -22 742.568 68.3721   3
   5   7 -22 670.969 42.0589   1
   5   7 -21-13.9717 12.3024   1
   5  -7 -21-9.13003 22.6522   3
   5   7 -20 1318.60 57.1631   1
   5  -7 -20 1278.98 82.6072   3
   5  -7 -19 84.8673 27.3050   3
   5   7 -19 62.5209 13.8239   1
  -5   7  18 1553.72 86.7888   3
   5  -7 -18 1416.14 82.3339   3
   5   7 -18 1518.87 58.8139   1
   5  -7 -17 359.400 43.2873   3
   5   7 -17 346.795 28.1097   1
  -5   7  17 384.261 44.4091   3
  -5   7  16 391.553 42.2876   3
   5   7 -16 361.377 28.5637   1
   5  -7 -16 373.329 42.9114   3
   5   7 -15 241.498 23.1629   1
  -5   7  15 256.381 33.9750   3
   5  -7 -15 226.719 33.7108   3
   5   7 -14 300.506 26.1591   1
   5  -7 -14 302.415 37.6794   3
  -5   7  14 310.799 36.2186   3
  -5   7  13 429.039 42.0421   3
   5  -7 -13 379.552 38.3173   3
   5   7 -13 394.520 29.4456   1
  -5   7  12 1235.13 64.7750   3
   5  -7 -12 1169.44 62.2361   3
   5   7 -12 1158.75 47.1843   1
   5   7 -11 746.891 38.1599   1
   5  -7 -11 801.741 51.3324   3
  -5   7  11 757.514 49.9125   3
   5   7 -10 12.6390 11.8491   1
  -5   7  10 16.6183 14.8065   3
   5  -7 -10 27.4160 17.9719   3
   5   7  -9 294.462 25.6900   1
   5  -7  -9 311.378 31.8495   3
  -5   7   9 272.753 31.2703   3
   5   7  -8 32.1583 13.2280   1
   5  -7  -8 35.8018 19.5061   3
  -5   7   8 51.7151 17.8927   3
  -5  -7   8 52.3144 13.8810   1
   5   7  -7 615.886 35.6593   1
   5   7  -7 634.046 41.0343   3
  -5  -7   7 581.865 33.8882   1
  -5   7   7 572.482 39.7624   3
   5  -7  -7 586.422 40.6829   3
   5  -7  -6 70.2145 22.3867   3
  -5  -7   6 61.9138 16.0616   1
  -5   7   6 55.3242 16.2307   3
   5   7  -6 83.4481 18.8256   1
   5   7  -6 45.1529 17.1393   3
  -5   7   5 3955.90 92.0941   3
   5   7  -5 4185.61 89.2547   1
  -5  -7   5 4093.48 88.9441   1
   5   7  -5 4249.26 98.6597   3
   5  -7  -5 4208.52 99.5475   3
   5   7  -4 827.954 45.9567   3
   5  -7  -4 826.130 45.5431   3
  -5  -7   4 798.834 43.6651   3
  -5   7   4 789.965 42.6203   3
  -5  -7   4 822.119 42.4358   1
  -5  -7   3 4333.05 95.1794   3
  -5   7   3 4057.56 93.5182   3
  -5  -7   3 4438.88 94.0324   1
   5  -7  -3 4356.14 98.1150   3
   5   7  -3 4348.41 96.9053   3
  -5   7   2 29.6188 15.8322   3
   5  -7  -2 38.6396 19.4622   3
  -5  -7   2 27.1617 17.0754   1
   5   7  -2 33.4394 16.4030   3
  -5  -7   2 20.4601 17.6790   3
   5  -7  -1 630.954 40.8872   3
   5   7  -1 587.843 36.6953   3
  -5  -7   1 642.745 39.9978   3
  -5  -7   1 669.392 40.7157   1
  -5   7   1 599.902 38.8751   3
  -5  -7   0 1915.64 65.9407   3
   5  -7   0 1866.18 64.4615   3
  -5   7   0 1808.58 65.0817   3
   5   7   0 1802.28 62.2000   3
  -5  -7  -1 924.879 47.5609   3
   5  -7   1 969.568 47.3508   3
  -5   7  -1 1005.52 49.0328   3
   5   7   1 910.473 45.2189   3
   5   7   2 5401.05 107.958   3
  -5   7  -2 5624.10 114.414   3
   5  -7   2 5404.66 108.721   3
  -5  -7  -2 5589.91 112.202   3
  -5   7  -3-6.61411 13.3871   3
  -5  -7  -3 16.0233 18.5707   3
   5   7   3-5.52563 13.5522   3
   5   7   4 616.032 39.1964   3
  -5   7  -4 636.503 40.9997   3
  -5  -7  -4 596.305 40.1458   3
  -5  -7  -5-6.70301 19.4088   3
   5   7   5-3.60108 12.4430   3
  -5   7  -5 9.85408 13.9273   3
  -5  -7  -6 310.765 31.7759   3
   5   7   6 326.444 23.0887   2
   5   7   6 357.688 33.6271   3
   5   7   7 543.490 41.4490   3
   5   7   7 545.427 28.4808   2
  -5  -7  -7 502.694 41.3748   3
  -5  -7  -8 607.018 45.4970   3
   5   7   8 534.567 42.0538   3
   5   7   8 576.607 29.3231   2
  -5  -7  -9 2719.77 93.9797   3
   5   7   9 2910.54 96.8517   3
   5   7  10 14.1691 15.1965   3
  -5  -7 -10 2.82639 18.6086   3
   5   7  11 813.281 56.6998   3
  -5  -7 -11 808.346 57.4108   3
   5   7  12 1542.56 79.0507   3
  -5  -7 -12 1409.31 74.6623   3
   5   7  13 267.810 36.7525   3
  -5  -7 -13 274.272 37.4970   3
   5   7  14 331.757 41.1867   3
  -5  -7 -14 345.841 42.4020   3
   5   7  15 1532.91 85.4841   3
  -5  -7 -15 1359.72 80.6840   3
   5   7  16 28.7318 19.6251   3
  -5  -7 -16 19.7850 21.7713   3
  -5  -7 -17 2577.91 115.183   3
  -5  -7 -18 347.192 23.8336   2
  -5  -7 -18 379.254 50.1785   3
  -5  -7 -19-47.4988 18.9968   2
  -5  -7 -19 21.9152 21.6825   3
  -5  -7 -20 529.332 30.2124   2
  -5  -7 -20 583.588 62.0265   3
  -5  -7 -21 596.018 64.5974   3
  -5  -7 -21 427.706 25.6159   2
  -5   7 -22 48.6056 27.3550   3
  -5  -7 -22 12.6175 14.4723   2
  -5  -7 -22 55.2349 30.0651   3
  -5  -7 -23 146.673 36.7652   3
  -5   7 -23 72.7377 27.1543   3
  -5   7 -24 8.21859 23.1421   3
  -5  -7 -24-20.4967 25.6253   3
  -5  -7 -25 32.2223 27.4720   3
  -5   7 -25 46.0121 34.1044   3
  -5   7 -26 62.4131 32.3338   3
  -5  -7 -26-11.1680 28.3468   3
  -5   7 -27-8.23933 27.9567   3
  -5  -7 -27 43.3187 29.6519   3
  -5  -7 -28 481.460 71.0884   3
  -5   7 -28 556.202 73.9666   3
  -5   7 -29 143.708 45.1307   3
  -5  -7 -29 139.124 49.8985   3
   5   9 -31 86.8619 30.7462   3
   5  -9 -31 43.5665 33.4413   3
   5  -9 -30-7.04697 31.6939   3
   5   9 -30-5.28748 27.1491   3
   5  -9 -29 234.034 47.3870   3
   5   9 -29 262.951 52.0353   3
   5  -9 -28 4.35322 25.4854   3
   5   9 -28 7.85449 31.1692   3
   5  -9 -27 829.592 83.6273   3
   5  -9 -26 294.064 51.7532   3
   5   9 -26 270.835 27.2673   1
   5   9 -25 1.51757 12.4490   1
   5  -9 -25-44.0951 27.6406   3
   5   9 -24 684.785 41.8910   1
   5  -9 -24 662.450 69.1286   3
   5  -9 -23-59.3171 33.4924   3
   5   9 -23 2.45901 13.4100   1
   5   9 -22 25.2529 10.5912   1
   5  -9 -22-25.7455 26.6732   3
   5  -9 -21 1265.27 87.7163   3
   5   9 -21 1362.76 57.6328   1
   5  -9 -20 3500.73 141.844   3
   5   9 -20 3815.21 95.2001   1
   5  -9 -19 2311.98 113.188   3
   5   9 -19 2277.64 73.1209   1
   5   9 -18 3119.49 84.8024   1
   5  -9 -18 2963.44 123.086   3
  -5   9  17 493.981 50.3479   3
   5  -9 -17 433.510 49.0561   3
   5   9 -17 458.556 33.7830   1
   5   9 -16 867.214 43.9365   1
   5  -9 -16 818.892 62.7121   3
  -5   9  16 937.075 66.0002   3
  -5   9  15 16.3583 14.5159   3
   5   9 -15 21.2082 10.2223   1
   5  -9 -15-1.65676 18.1117   3
   5   9 -14 1319.01 54.4891   1
  -5   9  14 1355.54 75.6668   3
   5  -9 -14 1349.20 75.0807   3
   5   9 -13 26.9462 11.3389   1
   5  -9 -13 1.66278 20.5170   3
  -5   9  13-6.69674 17.4337   3
   5   9 -12 915.802 45.3793   1
   5  -9 -12 867.808 58.7573   3
  -5   9  12 868.055 57.7560   3
   5   9 -11 826.563 43.3757   1
   5  -9 -11 813.191 55.4554   3
  -5   9  11 798.808 54.5177   3
   5  -9 -10 158.584 27.8009   3
   5   9 -10 212.558 26.3544   1
  -5  -9  10 184.695 21.6580   1
   5   9 -10 166.513 28.5271   3
  -5   9  10 178.319 26.1940   3
   5  -9  -9 35.6524 19.5260   3
  -5  -9   9 34.8445 13.1306   1
   5   9  -9 69.4911 20.3398   1
   5   9  -9 57.7980 19.3851   3
  -5   9   9 58.4496 21.4026   3
   5  -9  -8 15.0471 16.6929   3
   5   9  -8 47.8513 21.0417   1
  -5  -9   8-21.8302 13.5604   1
  -5   9   8-0.49167 15.0157   3
   5   9  -8-0.55154 15.5127   3
   5  -9  -7 30.1218 20.8698   3
  -5  -9   7-0.54504 14.9934   1
  -5   9   7 9.14978 14.6923   3
   5   9  -7-2.69432 16.5498   3
  -5   9   6 507.057 39.1596   3
  -5  -9   6 537.943 36.0992   1
   5   9  -6 620.466 45.9573   3
   5  -9  -6 554.819 44.1949   3
  -5  -9   5-5.55927 18.8845   3
  -5  -9   5 21.3469 14.6366   1
  -5   9   5 5.48454 14.7501   3
   5  -9  -5-10.5567 21.7627   3
   5   9  -5-4.55231 14.2723   3
  -5  -9   4 3534.17 98.4265   3
  -5   9   4 3369.59 95.4132   3
  -5  -9   4 3620.34 94.0944   1
   5  -9  -4 3561.45 101.733   3
   5   9  -4 3634.77 101.557   3
   5  -9  -3 1223.54 59.7336   3
  -5  -9   3 1150.33 55.8572   1
   5   9  -3 1147.85 58.4965   3
  -5   9   3 1162.39 57.4944   3
  -5  -9   3 1157.91 59.3530   3
   5   9  -2 1146.21 57.5941   3
  -5   9   2 1141.56 57.1110   3
   5  -9  -2 1148.58 58.5832   3
  -5  -9   2 1170.70 56.9968   1
  -5  -9   2 1107.98 58.3356   3
   5  -9  -1 3080.46 92.4175   3
  -5  -9   1 3087.87 93.7214   3
  -5   9   1 3038.65 93.1258   3
   5   9  -1 3017.94 91.1875   3
  -5   9   0 26.1537 16.8619   3
  -5  -9   0 22.2026 21.9810   3
   5   9   0 37.5367 18.8914   3
   5  -9   0 47.8308 21.9106   3
   5  -9   1 24.3513 20.2190   3
  -5   9  -1 13.6211 16.6691   3
  -5  -9  -1-1.99419 18.6065   3
   5   9   1 18.9752 14.2097   3
   5   9   2 819.250 48.0973   3
   5  -9   2 823.760 49.6416   3
  -5   9  -2 871.884 51.3911   3
  -5  -9  -2 824.959 51.3715   3
   5   9   3 81.6780 17.5100   3
  -5  -9  -3 105.604 25.1318   3
  -5   9  -3 86.2788 21.5557   3
  -5   9  -4 61.5287 19.9821   3
   5   9   4 69.3141 18.7679   3
  -5  -9  -4 66.7992 21.3426   3
  -5   9  -5 17.4301 15.6487   3
  -5  -9  -5 20.6488 16.6178   3
   5   9   5 33.0729 16.6858   3
  -5  -9  -6 76.4029 21.8876   3
   5   9   6 66.7535 20.2947   3
  -5   9  -6 44.6732 17.6408   3
  -5   9  -7 9.31557 14.4133   3
   5   9   7 13.9702 10.3187   2
  -5  -9  -7-3.47571 17.7937   3
   5   9   7 11.6840 17.4459   3
   5  -9   7 9.08570 7.07837   1
   5  -9   8 33.1497 6.31143   1
   5   9   8 31.2210 10.0280   2
   5   9   8 1.18263 15.5776   3
  -5  -9  -8 30.7994 18.4339   3
  -5  -9  -9 3298.68 109.828   3
   5   9   9 3181.67 68.5513   2
   5   9   9 3327.55 110.693   3
  -5  -9 -10 39.0230 19.8578   3
   5   9  10 56.1652 19.5539   3
   5   9  10 41.5696 10.7900   2
  -5  -9 -11 1788.18 86.5695   3
   5   9  11 1924.19 88.3009   3
   5   9  12 268.921 34.5490   3
  -5  -9 -12 210.781 32.5409   3
   5   9  13 541.103 51.4237   3
  -5  -9 -13 528.032 51.8990   3
   5   9  14 372.196 43.6056   3
  -5  -9 -14 328.743 43.4317   3
  -5  -9 -15 3034.57 122.939   3
  -5  -9 -16 387.899 49.5458   3
  -5  -9 -17 4457.21 157.649   3
  -5  -9 -18 1078.23 81.6925   3
  -5  -9 -19 183.163 37.9168   3
  -5  -9 -20 78.9780 27.5802   3
  -5  -9 -21 336.065 50.3401   3
  -5  -9 -22 778.926 76.7200   3
  -5  -9 -23 396.878 57.1847   3
  -5  -9 -24 370.640 58.9226   3
  -5   9 -25 217.966 48.7768   3
  -5  -9 -25 174.647 44.6924   3
  -5  -9 -26-4.73218 30.6024   3
  -5   9 -26-9.48458 27.5338   3
  -5   9 -27 9.26895 28.1847   3
  -5  -9 -27-31.2436 34.0642   3
  -5   9 -28-17.6553 35.2056   3
  -5  -9 -28 49.4504 30.8196   3
  -5   9 -29-52.3393 32.9263   3
  -5  -9 -29-28.2265 38.9135   3
   5  11 -31 63.8073 36.9778   3
   5 -11 -31 122.414 40.9289   3
   5  11 -30-38.9108 40.4202   3
   5 -11 -30-60.0367 46.6496   3
   5 -11 -29 22.4017 27.5899   3
   5 -11 -28 129.493 37.5978   3
   5 -11 -27 100.345 38.8962   3
   5 -11 -26 121.370 40.0033   3
   5  11 -25 1524.92 60.1254   1
   5 -11 -25 1564.44 111.179   3
   5  11 -24 6.24738 13.0389   1
   5 -11 -24-1.59873 26.3206   3
   5  11 -23 192.849 22.6677   1
   5 -11 -23 95.2054 27.4950   3
   5 -11 -22 10.3705 27.1185   3
   5  11 -22 63.3015 16.6386   1
   5 -11 -21 369.159 48.7921   3
   5  11 -21 438.260 33.5916   1
   5 -11 -20 80.9562 24.2849   3
   5  11 -20 112.765 18.9711   1
   5  11 -19 495.520 35.4922   1
   5 -11 -19 416.553 51.5660   3
   5 -11 -18 24.8316 19.4968   3
   5  11 -18 3.04451 11.9303   1
   5  11 -17 4.01290 11.4512   1
   5 -11 -17 7.52291 22.1576   3
  -5  11  16 120.898 26.5337   3
   5 -11 -16 90.7920 25.0316   3
   5  11 -16 134.976 21.6333   1
  -5  11  15 270.451 38.0360   3
   5 -11 -15 238.510 35.7264   3
   5  11 -15 272.907 28.3073   1
   5 -11 -14 5.69032 22.0159   3
   5  11 -14 47.5509 17.0072   1
  -5  11  14 16.3379 17.1861   3
   5  11 -13 525.109 51.1944   3
   5 -11 -13 527.316 50.3322   3
  -5  11  13 514.841 50.2939   3
   5  11 -12 276.451 36.2322   3
   5 -11 -12 279.041 38.3343   3
  -5 -11  12 241.054 25.2146   1
  -5  11  12 250.659 35.5829   3
  -5 -11  11 2033.20 70.4609   1
   5  11 -11 2188.20 95.3959   3
  -5  11  11 2084.52 91.8955   3
   5 -11 -11 2089.84 92.6493   3
  -5  11  10 112.865 27.8766   3
   5  11 -10 111.735 25.9055   3
  -5 -11  10 91.8058 17.9198   1
   5 -11 -10 95.6236 25.1975   3
  -5  11   9 1059.36 63.2450   3
  -5 -11   9 1014.32 51.4438   1
   5 -11  -9 1094.43 66.1363   3
   5  11  -9 1152.48 67.6836   3
   5  11  -8 2080.85 89.9607   3
  -5 -11   8 1937.47 71.2306   1
  -5  11   8 1925.05 82.4194   3
   5 -11  -8 1951.16 87.3601   3
  -5  11   7-8.45040 16.4683   3
  -5 -11   7-12.1040 16.5225   1
   5  11  -7 20.6731 18.6875   3
   5 -11  -7-0.74090 21.0296   3
   5  11  -6 374.818 39.4553   3
  -5 -11   6 372.227 39.3439   3
   5 -11  -6 300.668 34.1222   3
  -5 -11   6 362.437 34.7914   1
  -5  11   6 342.529 34.7317   3
  -5 -11   5 534.524 45.4063   3
  -5  11   5 519.638 43.6902   3
   5  11  -5 527.530 45.5240   3
   5 -11  -5 515.243 45.2885   3
  -5 -11   5 488.442 40.3269   1
  -5 -11   4 204.583 30.2471   3
   5  11  -4 217.589 29.7618   3
   5 -11  -4 224.831 32.5540   3
  -5  11   4 210.510 29.8882   3
  -5 -11   4 259.801 33.6374   1
  -5  11   3 5782.02 140.132   3
   5 -11  -3 6012.60 144.242   3
  -5 -11   3 5908.50 140.610   3
   5  11  -3 6030.49 142.731   3
  -5 -11   3 5820.95 129.803   1
   5 -11  -2 62.7335 24.0243   3
   5  11  -2 42.1214 20.7999   3
  -5  11   2 42.6841 19.9585   3
  -5 -11   2 34.2092 20.5316   3
   5 -11  -1 9196.96 174.936   3
  -5  11   1 8978.62 176.599   3
   5  11  -1 9185.88 174.476   3
  -5 -11   1 9177.99 174.253   3
  -5  11   0 664.967 50.0595   3
  -5 -11   0 595.902 49.5439   3
   5 -11   0 604.815 48.0048   3
   5  11   0 621.431 48.4361   3
  -5  11  -1 2351.80 90.8395   3
   5  11   1 2219.51 87.6112   3
  -5 -11  -1 2354.79 92.0541   3
   5 -11   1 2253.15 86.2028   3
  -5 -11  -2-5.85705 21.4718   3
   5  11   2-3.63485 14.7697   3
  -5  11  -2-2.28932 21.1003   3
   5 -11   2-6.68411 19.5109   3
   5 -11   3 1742.15 77.5515   3
  -5  11  -3 1880.07 82.9941   3
   5  11   3 1778.47 79.1766   3
  -5 -11  -3 1885.76 83.8471   3
  -5 -11  -4-5.15430 18.9963   3
   5  11   4 0.88254 14.7723   3
  -5  11  -4 10.4343 17.7613   3
   5  11   5 4078.62 117.937   3
  -5 -11  -5 4148.35 125.899   3
  -5  11  -5 4299.63 129.552   3
  -5 -11  -6 175.163 29.6988   3
  -5  11  -6 216.622 33.1247   3
   5  11   6 181.515 27.2235   3
   5  11   7 3377.22 113.020   3
  -5 -11  -7 3254.79 112.298   3
  -5  11  -7 3512.71 117.528   3
  -5 -11  -8 1477.26 78.5712   3
   5 -11   8 1312.86 40.3096   1
  -5  11  -8 1511.31 80.9853   3
   5  11   8 1537.48 78.4753   3
   5  11   8 1409.17 50.4673   2
   5 -11   9-6.32253 7.83345   1
  -5  11  -9-3.15854 21.0527   3
   5  11   9-4.35564 15.8540   3
   5  11   9 8.68084 10.2675   2
  -5 -11  -9-9.60658 19.5263   3
   5  11  10 133.465 27.5173   3
   5  11  10 118.114 15.9433   2
  -5 -11 -10 153.148 30.7868   3
  -5  11 -10 122.558 28.5969   3
   5 -11  10 128.584 10.3222   1
  -5 -11 -11 12.7543 18.1265   3
   5  11  11 30.4169 9.41548   2
   5  11  11 32.7657 18.0471   3
   5  11  12 201.275 32.7372   3
  -5 -11 -12 179.463 33.1494   3
   5  11  13 146.895 29.1208   3
  -5 -11 -13 173.718 32.4436   3
  -5 -11 -14 182.470 33.8289   3
  -5 -11 -15 51.3373 21.7356   3
  -5 -11 -16 16.0473 23.6283   3
  -5 -11 -17 122.153 31.7427   3
  -5 -11 -18 572.178 61.5209   3
  -5 -11 -19 15.4536 24.4687   3
  -5 -11 -20 29.4252 22.7301   3
  -5 -11 -21 95.1211 36.1079   3
  -5 -11 -22 2479.98 136.985   3
  -5 -11 -23 72.6865 34.6982   3
  -5 -11 -24 1444.09 111.516   3
  -5 -11 -25 55.8186 37.0982   3
  -5 -11 -26-10.4730 32.6920   3
  -5  11 -27 23.0094 30.6387   3
  -5 -11 -27-15.2662 31.3721   3
  -5  11 -28 11.3591 30.6459   3
  -5 -11 -28 0.59247 27.8832   3
   5 -13 -30 19.0370 28.1891   3
   5 -13 -29 112.526 36.2326   3
   5 -13 -28-21.6541 36.3062   3
   5 -13 -27 238.783 50.7046   3
   5 -13 -26 485.232 67.5022   3
   5 -13 -25 419.640 59.4949   3
   5 -13 -24 563.035 69.3479   3
   5 -13 -23-36.1683 32.2907   3
   5 -13 -22 133.568 40.5384   3
   5 -13 -21 701.327 71.4780   3
   5 -13 -20 64.7770 32.6516   3
   5 -13 -19 1.81556 25.1649   3
   5 -13 -18-11.9990 24.2102   3
   5 -13 -17 318.523 44.2813   3
   5 -13 -16 46.5157 21.8918   3
   5 -13 -15-8.94948 22.8302   3
   5  13 -14 544.179 54.9163   3
  -5  13  14 554.170 54.6806   3
   5 -13 -14 548.172 57.3791   3
   5  13 -13 91.1171 25.0850   3
  -5 -13  13 35.3711 11.5104   1
  -5  13  13 77.5250 26.2339   3
   5 -13 -13 74.7910 26.5796   3
  -5  13  12 578.118 52.6599   3
   5 -13 -12 617.388 57.7453   3
   5  13 -12 666.721 60.2649   3
  -5 -13  12 545.693 39.4052   1
  -5 -13  11 2066.61 76.9402   1
   5 -13 -11 2247.15 104.783   3
  -5  13  11 2271.38 100.855   3
   5  13 -11 2323.20 105.015   3
   5  13 -10 104.539 26.6090   3
  -5  13  10 93.5785 24.0460   3
   5 -13 -10 118.785 27.6221   3
  -5 -13  10 106.917 22.1775   1
   5 -13  -9 2363.10 103.921   3
  -5  13   9 2255.93 98.6078   3
   5  13  -9 2421.95 107.332   3
  -5 -13   9 2265.42 82.8427   1
   5  13  -8 930.839 66.1879   3
  -5  13   8 868.031 61.3047   3
  -5 -13   8 848.509 51.8317   1
   5 -13  -8 913.186 65.6545   3
  -5 -13   7 1003.66 57.6606   1
  -5  13   7 1021.68 66.3780   3
   5  13  -7 1081.73 70.1090   3
   5 -13  -7 1087.50 71.3517   3
   5  13  -6 1242.26 75.8733   3
   5 -13  -6 1168.54 72.7403   3
  -5  13   6 1168.37 69.4714   3
  -5 -13   6 1159.73 70.0704   3
  -5 -13   6 1162.69 62.1801   1
   5  13  -5 720.712 56.2550   3
  -5 -13   5 671.307 53.5486   3
  -5  13   5 658.474 53.0495   3
  -5 -13   5 646.680 48.4301   1
   5 -13  -5 714.691 58.2164   3
   5 -13  -4 1359.85 76.0805   3
  -5 -13   4 1218.14 70.4475   3
   5  13  -4 1360.98 76.2632   3
  -5 -13   4 1245.11 66.4812   1
  -5  13   4 1309.53 72.8758   3
  -5 -13   3 54.6727 24.8367   3
  -5  13   3 33.3132 17.7268   3
   5 -13  -3 43.7224 22.3910   3
  -5 -13   3 79.6996 24.2225   1
   5  13  -3 28.2792 18.2830   3
   5 -13  -2 2096.79 91.8762   3
   5  13  -2 1993.07 90.2497   3
  -5 -13   2 1992.70 91.2237   3
  -5  13   2 1991.24 90.4757   3
   5  13  -1 1939.64 87.8433   3
  -5 -13   1 1890.78 88.2662   3
  -5  13   1 1998.91 89.5563   3
   5 -13  -1 1912.49 89.0414   3
  -5 -13   0 364.167 42.5604   3
   5 -13   0 382.157 42.4123   3
   5  13   0 456.069 46.1951   3
  -5  13   0 424.396 43.9742   3
   5  13   1 1235.66 69.6618   3
   5 -13   1 1241.56 70.8296   3
  -5  13  -1 1282.45 73.6411   3
  -5 -13  -1 1342.87 76.1238   3
   5  13   2 1042.39 65.1632   3
  -5 -13  -2 1059.19 68.3813   3
  -5  13  -2 1119.90 70.4852   3
   5 -13   2 1042.26 66.5524   3
  -5  13  -3 461.879 45.8946   3
   5 -13   3 390.713 42.8429   3
  -5 -13  -3 447.987 47.1016   3
   5  13   3 407.920 41.7763   3
  -5 -13  -4 165.349 32.4985   3
  -5  13  -4 174.963 31.2016   3
   5  13   4 169.228 28.9892   3
  -5  13  -5 1438.86 80.9401   3
  -5 -13  -5 1453.91 80.4515   3
   5  13   5 1333.40 73.7905   3
  -5  13  -6 1715.57 89.7955   3
  -5 -13  -6 1728.83 89.1853   3
   5  13   6 1576.49 82.9018   3
   5  13   7 239.179 35.0379   3
  -5 -13  -7 240.362 36.6359   3
  -5  13  -7 280.656 40.3375   3
  -5  13  -8 1335.40 80.7313   3
  -5 -13  -8 1308.08 80.0282   3
   5 -13   8 1187.93 46.2743   1
   5  13   8 1276.39 76.0846   3
  -5 -13  -9 1247.70 77.7999   3
   5 -13   9 1158.94 43.0317   1
   5  13   9 1330.10 79.7675   3
  -5  13  -9 1370.94 83.1047   3
   5  13   9 1189.69 49.7244   2
  -5  13 -10 36.2848 17.8241   3
  -5 -13 -10-14.8188 20.4510   3
   5  13  10 15.3503 16.5392   3
   5 -13  10-5.87466 10.2200   1
   5  13  10 18.7904 11.8895   2
   5  13  11 811.187 65.0837   3
  -5 -13 -11 759.112 65.0658   3
  -5  13 -11 803.858 66.9187   3
   5 -13  11 756.692 27.4946   1
   5  13  11 698.560 36.1887   2
   5  13  12-1.95601 11.2871   2
  -5 -13 -12-12.0329 22.7633   3
  -5 -13 -13-6.41888 23.2497   3
  -5 -13 -14 458.106 53.0092   3
  -5 -13 -15-30.9692 26.8628   3
  -5 -13 -16 90.7614 30.1042   3
  -5 -13 -17 32.9731 26.5911   3
  -5 -13 -18 309.024 49.7970   3
  -5 -13 -19 195.884 42.1636   3
  -5 -13 -20 219.270 45.9771   3
  -5 -13 -21 106.733 37.7885   3
  -5 -13 -22 422.332 59.8770   3
  -5 -13 -23 948.327 89.5364   3
  -5 -13 -24 261.622 51.6515   3
  -5 -13 -25-1.99449 27.9753   3
  -5 -13 -26 22.5265 28.4515   3
  -5 -13 -27 84.8045 34.4286   3
   5 -15 -29-8.43769 29.8142   3
   5 -15 -28 212.596 51.4160   3
   5 -15 -27 41.2643 34.8027   3
   5 -15 -26 14.0928 32.3845   3
   5 -15 -25 146.034 41.7270   3
   5 -15 -24 276.440 53.2571   3
   5 -15 -23 1045.22 91.4067   3
   5 -15 -22 1412.26 104.316   3
   5 -15 -21 1022.48 88.4537   3
   5 -15 -20 366.144 55.3911   3
   5 -15 -19-20.7506 31.1382   3
   5 -15 -18-1.36564 24.8283   3
   5 -15 -17 0.89839 20.4250   3
   5 -15 -16 70.3231 29.5915   3
   5 -15 -15 1496.70 94.7169   3
  -5 -15  14 2.83598 15.1200   1
   5 -15 -14 49.2479 27.9626   3
  -5 -15  13 842.791 51.8621   1
   5 -15 -13 891.965 74.3007   3
   5 -15 -12 162.966 37.9732   3
  -5 -15  12 117.667 21.0460   1
  -5  15  11 117.158 26.6897   3
   5  15 -11 108.169 29.2005   3
  -5 -15  11 95.4478 21.5264   1
   5 -15 -11 90.7696 30.3138   3
  -5 -15  10 88.7755 19.3400   1
   5 -15 -10 97.6577 29.1966   3
   5  15 -10 81.2176 23.6505   3
  -5  15  10 123.129 28.7013   3
  -5 -15   9 208.735 28.2758   1
  -5  15   9 264.082 38.3199   3
   5 -15  -9 244.283 39.6002   3
   5  15  -9 242.512 38.5025   3
   5  15  -8 40.2366 19.2512   3
  -5  15   8 41.1354 19.8888   3
  -5 -15   8 53.7090 19.8829   1
   5 -15  -8 85.8199 27.6381   3
   5 -15  -7 246.700 39.6549   3
  -5 -15   7 249.833 31.8029   1
  -5  15   7 265.907 37.6265   3
   5  15  -7 300.794 42.1806   3
  -5 -15   6 18.1192 15.5425   1
   5 -15  -6 44.4805 25.1939   3
  -5  15   6-4.32216 15.1945   3
   5  15  -6 20.7130 21.2176   3
  -5 -15   6 24.5454 21.1556   3
   5 -15  -5 1245.37 79.7535   3
  -5  15   5 1120.33 72.3799   3
   5  15  -5 1268.24 80.1822   3
  -5 -15   5 1093.32 64.8797   1
  -5 -15   5 1131.64 74.8227   3
   5  15  -4 19.1396 17.9036   3
  -5 -15   4-8.51812 21.5195   3
  -5  15   4 8.03062 17.2632   3
  -5 -15   4 19.7231 16.1843   1
   5 -15  -4 5.95547 20.5581   3
  -5 -15   3 1095.29 73.8805   3
  -5 -15   3 1072.25 66.2727   1
  -5  15   3 1028.33 70.6575   3
   5  15  -3 1205.76 76.0068   3
   5 -15  -3 1169.53 75.8586   3
   5  15  -2 471.161 47.3246   3
  -5  15   2 409.455 45.6758   3
   5 -15  -2 453.017 48.8670   3
  -5 -15   2 421.822 47.4482   3
  -5  15   1 125.007 25.3909   3
  -5 -15   1 139.199 30.0538   3
   5 -15  -1 89.8063 23.9134   3
   5  15  -1 159.779 29.5722   3
   5 -15   0-6.06580 22.9266   3
  -5 -15   0 23.7732 21.1665   3
   5  15   0 1.02333 18.1546   3
  -5  15   0 18.9148 19.3289   3
  -5 -15  -1 1151.83 75.4054   3
   5  15   1 1075.81 71.4952   3
   5 -15   1 1093.39 71.9383   3
  -5  15  -1 1115.99 74.3771   3
  -5  15  -2 1884.27 95.7992   3
   5 -15   2 1661.17 88.2697   3
   5  15   2 1743.03 88.7654   3
  -5 -15  -2 1836.79 96.6288   3
  -5  15  -3 722.781 63.2823   3
   5 -15   3 711.221 59.3234   3
   5  15   3 719.384 58.8340   3
  -5 -15  -3 799.729 64.9165   3
  -5 -15  -4 1538.85 88.9953   3
   5  15   4 1412.83 80.6518   3
   5 -15   4 1372.05 81.0039   3
  -5  15  -4 1591.63 90.8143   3
   5  15   5 330.023 38.9763   3
  -5  15  -5 377.416 47.6672   3
  -5 -15  -5 370.816 47.9918   3
  -5  15  -6 0.38929 19.7966   3
  -5 -15  -6-24.4641 28.4725   3
   5  15   6-1.41551 18.4562   3
  -5 -15  -7 108.273 32.7271   3
   5  15   7 82.0509 23.6460   3
  -5  15  -7 103.632 29.0190   3
  -5 -15  -8-14.0076 21.2569   3
   5 -15   8-16.1842 13.7374   1
   5  15   8-13.2665 22.2553   3
  -5  15  -8-12.6683 20.3108   3
  -5 -15  -9 793.676 69.8615   3
   5 -15   9 674.309 38.2861   1
   5 -15  10 2231.64 64.5501   1
  -5 -15 -10 2408.98 117.817   3
   5  15  10 2239.38 71.3152   2
  -5 -15 -11 111.869 34.6312   3
   5  15  11 78.2748 15.6841   2
   5 -15  11 79.6858 12.3896   1
   5 -15  12 2371.37 54.0407   1
   5  15  12 2296.59 67.4590   2
  -5 -15 -12 2549.96 124.123   3
  -5 -15 -13 11.2249 22.8157   3
   5  15  13 10.7817 9.67201   2
  -5 -15 -14 6.77742 24.4868   3
  -5 -15 -15-7.80944 26.7925   3
  -5 -15 -16 73.2245 30.1392   3
  -5 -15 -17 330.297 52.0712   3
  -5 -15 -18 676.179 73.9426   3
  -5 -15 -19 1916.32 121.625   3
  -5 -15 -20 1071.08 92.2497   3
  -5 -15 -21 146.268 39.3646   3
  -5 -15 -22 470.204 65.1923   3
  -5 -15 -23 119.679 40.3722   3
  -5 -15 -24 62.8633 31.9228   3
  -5 -15 -25 71.9728 37.0163   3
  -5 -15 -26 29.8539 30.0162   3
   5 -17 -27 126.445 44.1099   3
   5 -17 -26 638.667 81.9216   3
   5 -17 -25-23.2805 27.1276   3
   5 -17 -24 1571.61 120.627   3
   5 -17 -23 33.1868 31.9007   3
   5 -17 -22 1282.00 106.257   3
   5 -17 -21-34.9057 30.1149   3
   5 -17 -20 52.5295 31.4748   3
   5 -17 -19-4.47589 23.3432   3
   5 -17 -18 441.259 59.0794   3
   5 -17 -17 38.6299 26.0709   3
   5 -17 -16 150.345 42.9020   3
  -5 -17  15 405.045 37.1794   1
   5 -17 -15 494.489 62.7674   3
   5 -17 -14 60.0503 31.7833   3
  -5 -17  14 0.63815 17.9810   1
  -5 -17  13 146.095 24.9186   1
   5 -17 -13 190.684 40.9723   3
   5 -17 -12 101.355 32.4399   3
  -5 -17  12 72.2047 18.2967   1
  -5 -17  11 414.832 40.2181   1
   5 -17 -11 435.942 54.8607   3
  -5 -17  10 37.3932 19.6278   1
   5 -17 -10 156.962 39.8602   3
   5 -17  -9 260.924 44.0114   3
  -5 -17   9 227.958 32.3773   1
  -5 -17   8 365.030 40.6863   1
   5 -17  -8 382.296 51.6154   3
  -5 -17   7 22.6472 22.8382   3
   5  17  -7 25.3700 19.5535   3
   5 -17  -7-15.1275 26.1103   3
  -5  17   7 14.0183 18.3732   3
  -5 -17   7 19.9100 17.4270   1
  -5  17   6-8.01072 22.2501   3
   5  17  -6 25.2312 20.6981   3
   5 -17  -6-11.2254 25.2001   3
  -5 -17   6-7.24373 15.3057   1
  -5 -17   6-37.3412 29.6909   3
  -5  17   5 1383.91 85.5711   3
   5  17  -5 1509.06 91.5805   3
   5 -17  -5 1436.18 90.8973   3
  -5 -17   5 1286.75 83.2703   3
  -5 -17   5 1291.44 77.6336   1
   5  17  -4 162.047 35.2977   3
  -5 -17   4 167.292 35.9752   3
  -5  17   4 191.574 37.4334   3
  -5 -17   4 152.185 32.2163   1
   5 -17  -4 197.455 40.9633   3
  -5  17   3 1537.82 91.8329   3
   5  17  -3 1540.10 91.7937   3
  -5 -17   3 1488.68 90.7419   3
  -5 -17   3 1362.42 79.3359   1
   5 -17  -3 1471.07 92.1907   3
  -5  17   2 428.996 51.7694   3
   5 -17  -2 401.199 49.3086   3
   5  17  -2 470.758 53.6177   3
  -5 -17   2 445.071 52.0946   3
   5  17  -1 75.6856 29.1072   3
  -5  17   1 62.8038 25.1149   3
   5 -17  -1 35.0711 24.3486   3
  -5 -17   1 46.8447 24.0421   3
   5 -17   0 2234.69 110.782   3
  -5  17   0 2322.62 112.871   3
  -5 -17   0 2190.77 110.998   3
   5  17   0 2303.72 110.224   3
   5  17   1 295.281 42.6212   3
  -5 -17  -1 358.487 50.2303   3
  -5  17  -1 328.339 45.7279   3
   5 -17   1 281.255 43.3234   3
   5  17   2 370.015 46.1157   3
  -5  17  -2 375.550 48.4210   3
   5 -17   2 311.814 46.0395   3
  -5 -17  -2 364.799 49.3035   3
  -5  17  -3 488.383 54.9087   3
  -5 -17  -3 467.301 54.5933   3
   5 -17   3 372.291 47.3522   3
   5  17   3 418.731 48.0180   3
  -5 -17  -4 103.146 30.5420   3
   5  17   4 73.6793 23.2403   3
   5 -17   4 49.2456 24.3543   3
  -5  17  -4 85.8024 26.1295   3
  -5 -17  -5-14.4424 24.9001   3
  -5 -17  -6 856.791 73.5852   3
  -5 -17  -7 528.591 60.1317   3
   5 -17   8 50.9763 13.9544   1
  -5 -17  -8 81.3185 29.0996   3
  -5 -17  -9 699.017 69.6236   3
   5 -17   9 525.725 37.7809   1
   5 -17  10 368.704 31.0639   1
  -5 -17 -10 488.210 59.7806   3
   5  17  11 8.28240 12.2284   2
   5 -17  11-10.0411 12.6230   1
  -5 -17 -11-6.14717 24.3854   3
  -5 -17 -12 98.3926 36.1418   3
   5 -17  12 93.4784 14.7929   1
   5  17  12 82.8149 16.9913   2
   5  17  13 15.7658 9.95010   2
  -5 -17 -13-3.86239 22.1821   3
   5 -17  13-10.6981 10.1891   1
  -5 -17 -14 63.7621 30.8966   3
   5  17  14 12.4154 9.80555   2
  -5 -17 -15 233.976 46.5712   3
  -5 -17 -16-35.6117 33.7347   3
  -5 -17 -17 81.7352 34.7988   3
  -5 -17 -18 22.4452 26.9878   3
  -5 -17 -19 1791.48 120.955   3
  -5 -17 -20 191.781 49.4938   3
  -5 -17 -21 1430.86 114.511   3
  -5 -17 -22 310.880 58.5370   3
  -5 -17 -23 169.349 48.5066   3
  -5 -17 -24 86.8622 41.2664   3
   5 -19 -26 495.677 74.7461   3
   5 -19 -25 90.8022 42.1410   3
   5 -19 -24 727.332 88.7808   3
   5 -19 -23 59.9042 34.1532   3
   5 -19 -22 112.738 37.4236   3
   5 -19 -21 151.170 43.3874   3
   5 -19 -20 1174.40 101.381   3
   5 -19 -19 705.829 79.7781   3
   5 -19 -18 2746.01 151.107   3
   5 -19 -17 762.819 80.8711   3
   5 -19 -16 880.000 85.2493   3
  -5 -19  15 244.167 32.0345   1
   5 -19 -15 283.868 51.4933   3
  -5 -19  14 473.442 45.3229   1
   5 -19 -14 569.238 66.3717   3
   5 -19 -13 39.9463 27.9118   3
  -5 -19  13 24.6923 15.9135   1
   5 -19 -12 2600.17 135.923   3
  -5 -19  12 2280.50 99.2255   1
   5 -19 -11 879.483 81.3093   3
  -5 -19  11 713.020 57.2271   1
   5 -19 -10 1023.93 86.7000   3
  -5 -19  10 856.872 62.0373   1
   5 -19  -9 237.421 46.4896   3
  -5 -19   9 222.732 33.5730   1
  -5 -19   8 42.5651 17.9236   1
   5 -19  -8 62.9796 29.9467   3
  -5 -19   7 50.4346 20.1306   1
  -5 -19   7 112.222 33.9995   3
   5 -19  -7 101.137 33.2311   3
   5 -19  -6 97.9868 32.7714   3
  -5 -19   6 88.1097 25.1975   1
  -5 -19   6 82.7042 26.5306   3
  -5 -19   5 187.144 35.0121   1
   5 -19  -5 239.381 44.8999   3
  -5 -19   5 209.909 40.2837   3
   5 -19  -4 1719.80 105.273   3
  -5 -19   4 1679.25 102.183   3
  -5 -19   4 1562.68 89.3346   1
  -5 -19   3 408.919 49.4847   1
   5 -19  -3 391.245 54.3715   3
  -5 -19   3 363.864 49.9613   3
   5 -19  -2 305.741 49.6360   3
  -5 -19   2 215.778 41.6325   3
  -5 -19   1 65.3271 26.0199   3
   5 -19  -1 50.5497 28.3301   3
  -5 -19   0 927.276 77.6498   3
   5 -19   0 768.149 69.5097   3
  -5 -19  -1 151.131 39.9741   3
   5 -19   1 165.871 34.9588   3
   5 -19   2 342.897 49.7223   3
  -5 -19  -2 390.766 54.5162   3
   5 -19   3 422.583 52.8161   3
  -5 -19  -3 475.225 58.8235   3
   5 -19   4 49.0773 25.3666   3
  -5 -19  -4 36.9828 22.0295   3
  -5 -19  -5 667.497 68.8325   3
  -5 -19  -6 131.211 38.2741   3
  -5 -19  -7 1627.58 106.083   3
   5 -19   8 16.6591 16.6450   1
  -5 -19  -8 134.359 38.3425   3
   5 -19   9 1856.06 76.7257   1
  -5 -19  -9 2246.96 126.013   3
   5 -19  10 19.3039 12.4311   1
  -5 -19 -10 49.5152 32.9042   3
  -5 -19 -11 1608.33 109.181   3
   5 -19  11 1443.10 62.9294   1
   5  19  12 57.4967 13.7018   2
   5 -19  12 72.9611 17.6852   1
  -5 -19 -12 61.8578 31.7973   3
  -5 -19 -13 1186.57 98.1323   3
   5 -19  13 1056.06 47.6988   1
   5  19  13 1039.42 51.2410   2
  -5 -19 -14 96.2104 33.4220   3
  -5 -19 -15 2175.51 134.469   3
  -5 -19 -16 623.841 75.7949   3
  -5 -19 -17 923.409 93.9847   3
  -5 -19 -18 232.753 54.4852   3
  -5 -19 -19 115.437 40.0196   3
  -5 -19 -20-10.7420 28.1553   3
  -5 -19 -21 612.658 79.5702   3
  -5 -19 -22 25.8797 34.6279   3
  -5 -19 -23 186.893 53.0161   3
   5 -21 -24 69.5032 40.5927   3
   5 -21 -23 190.535 50.9522   3
   5 -21 -22-57.9453 40.9076   3
   5 -21 -21 147.468 44.1650   3
   5 -21 -20 251.952 53.6665   3
   5 -21 -19 547.841 75.1760   3
   5 -21 -18 562.510 74.6663   3
   5 -21 -17 251.750 52.6466   3
   5 -21 -16 33.8159 29.9286   3
   5 -21 -15 10.5126 29.6560   3
  -5 -21  15-31.4203 20.8773   1
  -5 -21  14 105.282 24.8220   1
   5 -21 -14 143.288 40.2546   3
   5 -21 -13-20.6519 30.1233   3
  -5 -21  13 15.4147 17.0974   1
   5 -21 -12 2247.46 133.724   3
  -5 -21  12 1936.45 97.1792   1
   5 -21 -11 182.774 44.0680   3
  -5 -21  11 151.115 30.3270   1
   5 -21 -10 874.403 83.8503   3
  -5 -21  10 717.413 62.3155   1
   5 -21  -9 21.9935 26.2706   3
  -5 -21   9 57.3000 22.8648   1
   5 -21  -8 239.928 48.2487   3
  -5 -21   8 188.254 36.3950   1
  -5 -21   7-57.6475 37.8048   3
   5 -21  -7 1.05623 26.2558   3
  -5 -21   7-1.30655 20.1154   1
   5 -21  -6 88.7124 30.2752   3
  -5 -21   6 93.4301 31.8342   3
  -5 -21   5 777.484 74.7795   3
   5 -21  -5 949.048 84.3625   3
   5 -21  -4 428.964 59.4310   3
  -5 -21   4 425.303 55.7784   3
   5 -21  -3 3491.00 156.165   3
  -5 -21   3 3458.76 154.085   3
   5 -21  -2 52.5562 30.1413   3
  -5 -21   2 10.4486 25.7258   3
  -5 -21   1 3306.46 151.945   3
   5 -21  -1 3327.12 150.266   3
   5 -21   0 659.108 72.0740   3
  -5 -21   0 590.495 66.6232   3
  -5 -21  -1 1379.05 98.6892   3
   5 -21   1 1285.99 94.3236   3
  -5 -21  -2 38.0084 26.9193   3
   5 -21   2-62.1301 32.9928   3
  -5 -21  -3 715.185 75.7595   3
   5 -21   3 626.660 65.9240   3
  -5 -21  -4 17.6953 25.0414   3
   5 -21   4 4.48459 31.9705   3
  -5 -21  -5 1422.79 103.919   3
  -5 -21  -6 79.3717 29.4624   3
  -5 -21  -7 503.769 65.4653   3
   5 -21   7 405.872 42.8505   1
  -5 -21  -8 56.6555 32.9826   3
   5 -21   8 31.0125 17.6643   1
   5 -21   9-26.7476 21.0143   1
  -5 -21  -9-16.8600 29.5505   3
   5 -21  10 29.6013 15.7390   1
  -5 -21 -10-13.7888 28.4801   3
   5 -21  11 39.8518 13.5352   1
  -5 -21 -11 53.0799 33.1898   3
  -5 -21 -12-59.5502 36.9130   3
  -5 -21 -13-2.84841 26.8282   3
  -5 -21 -14 78.8640 36.7056   3
  -5 -21 -15-1.49290 30.8376   3
  -5 -21 -16 719.942 85.0714   3
  -5 -21 -17-2.64781 29.0787   3
  -5 -21 -18 114.686 38.8766   3
  -5 -21 -19-0.18007 30.2808   3
  -5 -21 -20 284.828 61.1635   3
  -5 -21 -21 71.9568 37.2301   3
   5 -23 -22-41.9583 49.5392   3
   5 -23 -21-46.4538 39.6700   3
   5 -23 -20-67.5955 41.4286   3
   5 -23 -19-79.2178 39.9847   3
   5 -23 -18-10.1319 36.9748   3
   5 -23 -17 345.100 63.0344   3
   5 -23 -16 58.0240 35.0909   3
   5 -23 -15 775.677 89.1846   3
   5 -23 -14 47.3892 35.0058   3
   5 -23 -13 257.057 55.6330   3
   5 -23 -12 413.303 64.2706   3
   5 -23 -11 102.567 36.1228   3
   5 -23 -10 148.209 43.0591   3
   5 -23  -9 520.341 69.4172   3
   5 -23  -8 1001.10 92.1050   3
   5 -23  -7 403.876 62.7239   3
   5 -23  -6 901.635 88.7535   3
  -5 -23   6 846.574 83.0846   3
  -5 -23   5 33.5971 24.0080   3
   5 -23  -5 99.3577 35.4633   3
  -5 -23   4 293.239 50.2935   3
   5 -23  -4 318.047 50.4650   3
   5 -23  -3 1661.18 115.051   3
  -5 -23   3 1696.14 113.967   3
   5 -23  -2 1934.93 123.656   3
  -5 -23   2 1652.74 113.638   3
   5 -23  -1 2184.27 128.538   3
  -5 -23   1 2095.49 129.919   3
   5 -23   0 1744.76 115.613   3
  -5 -23   0 1822.80 120.198   3
  -5 -23  -1 919.767 86.9454   3
   5 -23   1 973.980 87.1910   3
   5 -23   2 78.7789 29.7519   3
  -5 -23  -2 25.6092 24.6944   3
  -5 -23  -3 812.511 82.8662   3
   5 -23   3 665.796 72.7964   3
  -5 -23  -4 13.5434 28.0334   3
   5 -23   4 45.7517 25.3120   3
  -5 -23  -5 1043.83 95.3969   3
  -5 -23  -6 1235.74 103.941   3
  -5 -23  -7 194.245 45.9461   3
   5 -23   7 254.820 41.3635   1
   5 -23   8 594.868 54.4159   1
  -5 -23  -8 707.006 81.3111   3
  -5 -23  -9 166.559 46.6807   3
  -5 -23 -10 66.1535 41.4385   3
  -5 -23 -11 308.789 57.4480   3
  -5 -23 -12 504.355 73.6716   3
  -5 -23 -13 87.5265 43.4221   3
  -5 -23 -14 698.601 86.1184   3
  -5 -23 -15 22.1831 34.3442   3
  -5 -23 -16 17.2924 36.0041   3
  -5 -23 -17-6.49067 36.2923   3
  -5 -23 -18-86.3303 47.4937   3
  -5 -23 -19 131.519 50.8821   3
   5 -25 -19 3.65568 38.4468   3
   5 -25 -18-26.4464 39.2262   3
   5 -25 -17 266.933 60.8930   3
   5 -25 -16 33.2113 39.2782   3
   5 -25 -15 347.657 65.3693   3
   5 -25 -14 38.6801 39.3839   3
   5 -25 -13 164.111 57.3396   3
   5 -25 -12 19.7363 35.5974   3
   5 -25 -11 10.6410 30.5458   3
   5 -25 -10-41.6286 35.7469   3
   5 -25  -9 161.986 47.3795   3
   5 -25  -8 39.7052 33.9903   3
   5 -25  -7 648.264 80.9081   3
  -5 -25   6 0.47314 27.4038   3
   5 -25  -6 0.94474 31.2146   3
  -5 -25   5 111.317 38.4232   3
   5 -25  -5 75.1894 35.3929   3
  -5 -25   4 31.3749 30.5480   3
   5 -25  -4 35.7669 29.2902   3
   5 -25  -3-38.7082 32.6754   3
  -5 -25   3 72.6554 34.5681   3
   5 -25  -2 332.075 53.4796   3
  -5 -25   2 248.735 48.6750   3
  -5 -25   1 26.2792 27.1835   3
   5 -25  -1-8.45286 26.0666   3
   5 -25   0 52.5561 32.4006   3
  -5 -25   0 3.56900 25.9924   3
  -5 -25  -1 51.4276 33.6207   3
   5 -25   1 64.2959 31.7941   3
   5 -25   2 882.720 88.4190   3
  -5 -25  -2 912.888 94.7335   3
   5 -25   3 184.122 45.4852   3
  -5 -25  -3 169.867 48.8979   3
  -5 -25  -4 753.744 88.7319   3
  -5 -25  -5 60.2744 32.6202   3
  -5 -25  -6 19.3244 28.3027   3
  -5 -25  -7-26.7351 32.9834   3
  -5 -25  -8 306.246 55.6444   3
  -5 -25  -9 240.812 54.7470   3
  -5 -25 -10 1276.22 114.097   3
  -5 -25 -11 479.000 75.9544   3
  -5 -25 -12 292.116 61.7399   3
  -5 -25 -13 276.843 57.8484   3
  -5 -25 -14-45.1902 42.3926   3
  -5 -25 -15 58.5522 35.3735   3
  -5 -25 -16-53.7640 37.2513   3
   5 -27 -15 9.17056 35.9447   3
   5 -27 -14 17.6538 36.3338   3
   5 -27 -13 65.4710 38.8545   3
   5 -27 -12-34.1153 36.4947   3
   5 -27 -11-9.24469 35.3031   3
   5 -27 -10 40.4280 32.1007   3
   5 -27  -9-45.3873 34.9356   3
   5 -27  -8 23.1353 29.6424   3
   5 -27  -7 4.59723 28.9648   3
  -5 -27   6 20.6557 28.7922   3
   5 -27  -6 41.5306 37.0901   3
   5 -27  -5 31.4470 35.7671   3
  -5 -27   5-1.87658 30.0247   3
   5 -27  -4 34.7274 32.2591   3
  -5 -27   4 81.0038 38.3590   3
  -5 -27   3 52.9231 33.0730   3
   5 -27  -3 1.11681 26.5125   3
  -5 -27   2 133.469 39.5944   3
   5 -27  -2 140.452 42.5957   3
  -5 -27   1 34.0382 34.6312   3
   5 -27  -1-0.04208 31.0862   3
   5 -27   0 53.8756 31.4813   3
  -5 -27   0 74.9638 34.0258   3
   5 -27   1 15.7457 28.6132   3
  -5 -27  -1 12.6148 30.1591   3
  -5 -27  -2 229.302 56.7034   3
   5 -27   2 243.458 52.9165   3
  -5 -27  -3 311.880 63.7771   3
   5 -27   3 308.923 59.5061   3
  -5 -27  -4 177.975 48.6779   3
  -5 -27  -5 81.6582 39.2310   3
  -5 -27  -6-29.6427 29.8520   3
  -5 -27  -7-57.7095 35.5429   3
  -5 -27  -8 20.5231 35.7667   3
  -5 -27  -9 4.83204 31.0421   3
  -5 -27 -10 659.778 88.2882   3
  -5 -27 -11 177.947 58.4951   3
  -5 -27 -12 226.404 57.7032   3
   5 -29 -10 148.461 51.6156   3
   5 -29  -9 0.52854 33.8321   3
   5 -29  -8 104.934 42.2427   3
   5 -29  -7-25.5152 38.6483   3
   5 -29  -6-44.4456 44.1074   3
  -5 -29   5-30.6114 41.0177   3
   5 -29  -5 7.47704 29.2745   3
   5 -29  -4 100.218 46.1693   3
  -5 -29   4 46.9957 33.1810   3
   5 -29  -3 442.477 71.2979   3
  -5 -29   3 407.517 69.7100   3
   5 -29  -2 52.8988 46.2366   3
  -5 -29   2 64.6625 43.5527   3
   5 -29  -1 1036.60 106.519   3
  -5 -29   1 1057.26 109.496   3
  -5 -29   0 289.523 63.0306   3
   5 -29   0 403.566 68.3426   3
   5 -29   1 268.730 55.8136   3
  -5 -29  -1 213.350 51.8966   3
  -5 -29  -2-68.2597 50.8250   3
   5 -29   2 7.82721 26.7556   3
  -5 -29  -3 63.4106 38.8294   3
  -5 -29  -4 43.6951 33.4464   3
  -5 -29  -5 773.188 96.9890   3
  -5 -29  -6 729.802 97.0753   3
  -5 -29  -7 1393.11 128.551   3
   6   0 -33-14.1941 29.9975   3
   6   0 -32 48.4574 25.6385   3
   6   0 -31-38.7965 31.7202   3
   6   0 -30-49.1233 33.7871   3
   6   0 -29 6.24427 23.4998   3
   6   0 -28 114.298 37.9702   3
   6   0 -27 18.2355 26.5025   3
   6   0 -26 1326.51 95.1416   3
   6   0 -25-32.2965 26.5162   3
   6   0 -24 910.212 75.2493   3
   6   0 -23-3.45947 20.6390   3
   6   0 -22 1804.99 99.4575   3
   6   0 -21-27.5399 26.2790   3
   6   0 -20 1461.50 85.0831   3
   6   0 -19-18.9516 20.8806   3
   6   0 -18 478.819 46.3146   3
   6   0 -17-13.1505 18.0135   3
   6   0 -16 114.381 24.9525   3
   6   0 -15 7.06215 16.4776   3
   6   0 -14 955.498 55.4669   3
   6   0 -13 7.56491 16.3947   3
   6   0 -12 8329.85 146.664   3
   6   0 -11 33.2185 22.3962   3
   6   0 -10 39312.6 279.128   3
   6   0  -9 41.9650 19.4739   3
   6   0  -7 3.98897 13.7422   3
   6   0  -6 1865.06 45.1286   3
   6   0  -5 5.81880 8.63974   3
   6   0  -4 30.9650 8.25485   3
   6   0  -3-1.47707 9.71179   2
   6   0  -2 51.9008 10.7374   2
  -6   0   2 48.2322 11.6900   2
   6   0  -1 31.2184 10.3051   1
   6   0  -1 7.31229 8.44458   2
  -6   0   1 2.76936 10.2646   2
   6   0   0 487.563 22.6706   1
  -6   0   0 477.481 25.1318   2
  -6   0   0 471.520 21.8096   1
   6   0   0 474.212 24.6796   2
  -6   0  -1 4.56397 11.4342   2
  -6   0  -1 1.04462 8.96833   1
  -6   0  -1 11.8148 7.72666   3
   6   0   1 24.8242 9.69577   1
  -6   0  -2 182.349 15.2241   3
  -6   0  -2 173.382 14.6663   1
  -6   0  -2 189.029 19.8428   2
   6   0   2 207.294 16.3678   1
  -6   0  -3-5.54681 10.7390   3
  -6   0  -3 3.55110 9.48913   1
  -6   0  -4 13317.5 114.238   1
  -6   0  -4 13320.0 133.661   3
  -6   0  -5 13.6520 16.0154   3
  -6   0  -5 28.3954 12.3023   1
  -6   0  -7 51.0389 25.4197   3
  -6   0  -8 12879.4 172.149   3
  -6   0  -9 5.40939 17.1257   3
  -6   0 -10 402.928 38.3159   3
  -6   0 -11-15.9851 17.5824   3
  -6   0 -12 753.508 52.9148   3
  -6   0 -13-6.41131 18.4164   3
  -6   0 -14 711.979 55.3967   3
  -6   0 -15-5.37598 17.8350   3
  -6   0 -16 325.092 40.5240   3
  -6   0 -17-15.6526 20.2081   3
  -6   0 -18 1354.17 85.4337   3
  -6   0 -19-23.7535 22.5124   3
  -6   0 -20 125.204 31.2046   3
  -6   0 -21 10.7881 20.8056   3
  -6   0 -22 2199.91 119.996   3
  -6   0 -23 53.9337 35.8682   3
  -6   0 -24 721.093 74.5597   3
  -6   0 -25 15.1566 23.8368   3
  -6   0 -26 44.3859 28.6648   3
  -6   0 -27-25.1182 27.3520   3
  -6   0 -28-69.0366 41.1183   3
  -6   0 -29-62.0110 46.1102   3
  -6   0 -30 67.3064 37.3199   3
   6   2 -33 56.6551 40.3767   3
   6  -2 -33-43.7356 34.2450   3
   6   2 -32 67.5612 29.4272   3
   6  -2 -32 78.3337 34.8311   3
   6   2 -31-33.6794 31.5404   3
   6  -2 -31 7.04916 25.4873   3
   6   2 -30-24.0489 30.3289   3
   6  -2 -30-0.67584 25.6815   3
   6   2 -29 112.430 36.6756   3
   6  -2 -29 123.973 37.9065   3
   6   2 -28 0.15244 23.5819   3
   6  -2 -28 6.76685 25.7587   3
   6   2 -27 478.608 61.6956   3
   6  -2 -27 420.495 58.7727   3
   6   2 -26 203.854 43.6842   3
   6  -2 -26 176.835 37.4475   3
   6   2 -25 843.178 74.4050   3
   6  -2 -25 846.740 73.8747   3
   6   2 -24-1.58460 23.6437   3
   6  -2 -24-15.5153 25.2530   3
   6   2 -23 6.35153 24.4539   3
   6  -2 -23-4.27405 19.6678   3
   6  -2 -22 3079.43 128.769   3
   6   2 -22 3227.70 130.939   3
   6   2 -21 453.159 51.8430   3
   6  -2 -21 368.765 45.4488   3
   6  -2 -20 2723.10 113.944   3
   6   2 -20 2864.25 116.747   3
   6   2 -19 370.965 45.7963   3
   6  -2 -19 314.493 40.4582   3
   6  -2 -18 257.215 36.2539   3
   6   2 -18 289.770 38.6584   3
   6   2 -17 251.366 36.7343   3
   6  -2 -17 225.100 32.8202   3
   6   2 -16 1952.23 87.9596   3
   6  -2 -16 2068.07 87.0032   3
   6   2 -15 1536.29 76.1320   3
   6  -2 -15 1562.40 73.6060   3
   6  -2 -14 3237.68 100.582   3
   6  -2 -13 2095.88 77.3666   3
   6  -2 -12 1709.47 67.5615   3
  -6   2  12 1789.78 68.2801   3
  -6   2  11 135.021 23.0351   3
   6  -2 -11 152.436 24.0940   3
  -6   2  10 15470.8 179.910   3
   6  -2 -10 15293.3 179.112   3
   6  -2  -9 245.541 25.9600   3
  -6   2   9 253.802 24.7498   3
   6  -2  -8 5069.15 90.5934   3
  -6   2   8 4960.08 89.7913   3
   6  -2  -7 3631.50 71.7413   3
  -6   2   7 3682.13 72.1395   3
  -6   2   6 704.670 29.9409   3
   6  -2  -6 695.240 25.0555   2
   6  -2  -6 747.109 31.0106   3
   6  -2  -5 3622.79 55.3481   2
  -6   2   5 3641.67 59.8694   3
  -6   2   5 3695.57 55.3017   2
   6  -2  -5 3638.73 59.3104   3
   6   2  -4 3164.47 64.2183   1
  -6   2   4 3161.42 49.4478   3
   6  -2  -4 3142.18 53.4573   2
  -6   2   4 3294.03 54.0603   2
   6  -2  -4 3285.57 50.3974   3
   6   2  -3 3143.16 62.3310   1
  -6   2   3 3119.22 43.8229   3
  -6  -2   3 2970.43 60.6785   1
   6  -2  -3 3033.86 44.5632   3
  -6   2   3 3114.16 54.4472   2
   6   2  -3 3018.67 44.3461   3
  -6  -2   2 98.4964 16.0595   1
   6  -2  -2 97.1512 10.1044   3
   6   2  -2 93.2855 14.8664   1
   6   2  -2 100.734 9.88516   3
  -6   2   2 104.359 14.7215   2
  -6  -2   2 102.932 9.60192   3
  -6   2   2 101.470 10.0719   3
   6   2  -1 1216.30 26.4504   3
  -6  -2   1 1204.69 27.4476   3
   6   2  -1 1142.32 37.9219   1
  -6  -2   1 1147.87 38.4033   1
  -6   2   1 1161.41 27.4354   3
   6  -2  -1 1241.32 27.3530   3
  -6  -2   0 2077.87 50.9625   1
   6   2   0 2174.21 37.9186   3
   6   2   0 2236.44 53.0888   1
  -6  -2   0 2265.14 39.1868   3
   6   2   0 2175.89 50.5171   2
  -6   2   0 2178.23 39.6693   3
   6   2   1 7584.78 98.4739   1
   6   2   1 8091.88 97.3619   2
  -6  -2  -1 7754.19 99.4455   1
  -6  -2  -1 8100.34 81.2313   3
  -6  -2  -1 7748.07 96.3237   2
   6   2   1 7813.07 80.4703   3
  -6  -2  -2 394.285 23.7717   2
   6   2   2 397.201 22.2654   3
  -6  -2  -2 422.230 23.0328   3
  -6  -2  -2 419.126 26.4343   1
   6  -2   2 412.065 17.5275   1
   6   2   2 459.435 26.0265   2
  -6  -2  -3 7155.78 98.9700   1
  -6  -2  -3 7400.71 95.3643   3
   6   2   3 7284.26 94.1868   3
   6   2   3 7329.73 96.1508   2
  -6  -2  -3 7431.50 97.1206   2
   6  -2   3 7065.50 65.1617   1
   6   2   4 1914.16 53.8007   3
  -6  -2  -4 1926.79 54.3989   3
  -6  -2  -4 1865.57 50.6871   2
  -6   2  -4 1777.11 31.8566   1
   6  -2   4 1878.44 33.3260   1
  -6  -2  -5 368.933 25.9409   2
   6   2   5 369.256 26.9674   3
  -6   2  -5 340.305 14.9748   1
  -6  -2  -5 354.709 27.5778   3
  -6  -2  -6 11641.6 149.866   3
  -6  -2  -6 11419.9 130.887   2
  -6   2  -6 11232.0 82.6107   1
  -6  -2  -7 100.773 19.7241   3
  -6  -2  -7 91.5235 17.1564   2
   6   2   7 114.985 19.7247   3
  -6   2  -7 95.7159 9.90211   1
   6   2   8 3499.57 92.5303   3
  -6   2  -8 3865.86 54.7651   1
  -6  -2  -8 3892.18 96.9220   3
  -6  -2  -9 408.166 35.5239   3
  -6  -2 -10 1523.31 67.5406   3
[truncated: 1,843,312 more chars]
