# Supplementary material for: Cyanide Complexes Based on {Mo6I8}4+ and {W6I8}4+ Cluster Cores
Source: MDPI journal article supplement (doi:10.3390/molecules25245796), 2020-12-08
Supplement: s1 [file s1 › Compound 3.cif]

 
data_ys1831

_audit_creation_method           SHELXL-2018/3
_shelx_SHELXL_version_number     2018/3
_chemical_name_systematic        ?
_chemical_name_common            ?
_chemical_melting_point          ?
_chemical_formula_moiety         ?
_chemical_formula_sum            'C42 H84 I8 Mo6 N8 O2 S2'
_chemical_formula_weight         2388.13

loop_
_atom_type_symbol
_atom_type_description
_atom_type_scat_dispersion_real
_atom_type_scat_dispersion_imag
_atom_type_scat_source
C C 0.0033 0.0016 'International Tables Vol C Tables 4.2.6.8 and 6.1.1.4'
H H 0.0000 0.0000 'International Tables Vol C Tables 4.2.6.8 and 6.1.1.4'
N N 0.0061 0.0033 'International Tables Vol C Tables 4.2.6.8 and 6.1.1.4'
O O 0.0106 0.0060 'International Tables Vol C Tables 4.2.6.8 and 6.1.1.4'
S S 0.1246 0.1234 'International Tables Vol C Tables 4.2.6.8 and 6.1.1.4'
Mo Mo -1.6832 0.6857 'International Tables Vol C Tables 4.2.6.8 and 6.1.1.4'
I I -0.4742 1.8119 'International Tables Vol C Tables 4.2.6.8 and 6.1.1.4'

_space_group_crystal_system      triclinic
_space_group_IT_number           2
_space_group_name_H-M_alt        'P -1'
_space_group_name_Hall           '-P 1'

_shelx_space_group_comment       
;
The symmetry employed for this shelxl refinement is uniquely defined
by the following loop, which should always be used as a source of
symmetry information in preference to the above space-group names.
They are only intended as comments.
;

loop_
_space_group_symop_operation_xyz
'x, y, z'
'-x, -y, -z'

_cell_length_a                   10.7807(4)
_cell_length_b                   11.4600(5)
_cell_length_c                   15.2964(7)
_cell_angle_alpha                92.784(4)
_cell_angle_beta                 91.598(3)
_cell_angle_gamma                113.849(4)
_cell_volume                     1724.08(14)
_cell_formula_units_Z            1
_cell_measurement_temperature    150(2)
_cell_measurement_reflns_used    7362
_cell_measurement_theta_min      2.55
_cell_measurement_theta_max      28.74

_exptl_crystal_description       plate
_exptl_crystal_colour            orange
_exptl_crystal_density_meas      ?
_exptl_crystal_density_method    ?
_exptl_crystal_density_diffrn    2.300
_exptl_crystal_F_000             1116
_exptl_transmission_factor_min   ?
_exptl_transmission_factor_max   ?
_exptl_crystal_size_max          0.15
_exptl_crystal_size_mid          0.14
_exptl_crystal_size_min          0.07
_exptl_absorpt_coefficient_mu    4.737
_shelx_estimated_absorpt_T_min   0.537
_shelx_estimated_absorpt_T_max   0.733
_exptl_absorpt_correction_type   multi-scan
_exptl_absorpt_correction_T_min  0.77673
_exptl_absorpt_correction_T_max  1.00000
_exptl_absorpt_process_details   
;
CrysAlisPro 1.171.39.46 (Rigaku Oxford Diffraction, 2015)
Empirical absorption correction using spherical harmonics,
implemented in SCALE3 ABSPACK scaling algorithm.
;
_exptl_absorpt_special_details   ?

_diffrn_radiation_probe          x-ray
_diffrn_radiation_source         'fine-focus sealed tube'
_diffrn_radiation_monochromator  graphite
_diffrn_measurement_device       'four-circle diffractometer'
_diffrn_detector                 'CCD plate'
_diffrn_detector_type            AtlasS2
_diffrn_ambient_temperature      150(2)
_diffrn_radiation_wavelength     0.71073
_diffrn_radiation_type           MoK\a
_diffrn_source                   'sealed X-ray tube'
_diffrn_measurement_device_type  'New Xcalibur, AtlasS2'
_diffrn_measurement_method       '\w scans'
_diffrn_detector_area_resol_mean 10.6
_diffrn_reflns_number            12899
_diffrn_reflns_av_unetI/netI     0.0307
_diffrn_reflns_av_R_equivalents  0.0177
_diffrn_reflns_limit_h_min       -14
_diffrn_reflns_limit_h_max       14
_diffrn_reflns_limit_k_min       -15
_diffrn_reflns_limit_k_max       14
_diffrn_reflns_limit_l_min       -20
_diffrn_reflns_limit_l_max       11
_diffrn_reflns_theta_min         1.947
_diffrn_reflns_theta_max         29.066
_diffrn_reflns_theta_full        25.500
_diffrn_measured_fraction_theta_max 0.848
_diffrn_measured_fraction_theta_full 1.000
_diffrn_reflns_Laue_measured_fraction_max 0.848
_diffrn_reflns_Laue_measured_fraction_full 1.000
_diffrn_reflns_point_group_measured_fraction_max 0.848
_diffrn_reflns_point_group_measured_fraction_full 1.000
_reflns_number_total             7839
_reflns_number_gt                6675
_reflns_threshold_expression     'I > 2\s(I)'
_reflns_Friedel_coverage         0.000
_reflns_Friedel_fraction_max     .
_reflns_Friedel_fraction_full    .

_reflns_special_details          
;
 Reflections were merged by SHELXL according to the crystal
 class for the calculation of statistics and refinement.
 
 _reflns_Friedel_fraction is defined as the number of unique
 Friedel pairs measured divided by the number that would be
 possible theoretically, ignoring centric projections and
 systematic absences.
;
_computing_data_collection       'CrysAlisPro 1.171.39.46 (Rigaku OD, 2015)'
_computing_cell_refinement       'CrysAlisPro 1.171.39.46 (Rigaku OD, 2015)'
_computing_data_reduction        'CrysAlisPro 1.171.39.46 (Rigaku OD, 2015)'
_computing_structure_solution    'SHELXT-2018 (Sheldrick, 2015)'
_computing_structure_refinement  'SHELXL-2018 (Sheldrick, 2015)'
_computing_molecular_graphics    'ShelXle (H\"ubschle, 2011)'
_computing_publication_material  'CIFTAB (Sheldrick, 2015)'

_refine_special_details          ?
_refine_ls_structure_factor_coef Fsqd
_refine_ls_matrix_type           full
_refine_ls_weighting_scheme      calc
_refine_ls_weighting_details     
'w=1/[\s^2^(Fo^2^)+(0.0175P)^2^] where P=(Fo^2^+2Fc^2^)/3'
_atom_sites_solution_primary     dual
_atom_sites_solution_secondary   difmap
_atom_sites_solution_hydrogens   geom
_refine_ls_hydrogen_treatment    constr
_refine_ls_extinction_method     none
_refine_ls_extinction_coef       .
_refine_ls_number_reflns         7839
_refine_ls_number_parameters     313
_refine_ls_number_restraints     0
_refine_ls_R_factor_all          0.0289
_refine_ls_R_factor_gt           0.0215
_refine_ls_wR_factor_ref         0.0479
_refine_ls_wR_factor_gt          0.0457
_refine_ls_goodness_of_fit_ref   0.992
_refine_ls_restrained_S_all      0.992
_refine_ls_shift/su_max          0.003
_refine_ls_shift/su_mean         0.000

loop_
_atom_site_label
_atom_site_type_symbol
_atom_site_fract_x
_atom_site_fract_y
_atom_site_fract_z
_atom_site_U_iso_or_equiv
_atom_site_adp_type
_atom_site_occupancy
_atom_site_site_symmetry_order
_atom_site_calc_flag
_atom_site_refinement_flags_posn
_atom_site_refinement_flags_adp
_atom_site_refinement_flags_occupancy
_atom_site_disorder_assembly
_atom_site_disorder_group
Mo1 Mo 0.99039(2) 0.64097(2) 0.94341(2) 0.01588(6) Uani 1 1 d . . . . .
Mo2 Mo 0.85760(2) 0.49592(2) 1.07169(2) 0.01617(6) Uani 1 1 d . . . . .
Mo3 Mo 0.87003(2) 0.38414(2) 0.91588(2) 0.01602(6) Uani 1 1 d . . . . .
I1 I 1.27077(2) 0.76830(2) 0.95318(2) 0.01978(5) Uani 1 1 d . . . . .
I2 I 0.97677(2) 0.76036(2) 1.10315(2) 0.01954(5) Uani 1 1 d . . . . .
I3 I 1.00220(2) 0.52920(2) 0.78056(2) 0.02169(5) Uani 1 1 d . . . . .
I4 I 0.70752(2) 0.51964(2) 0.92789(2) 0.02092(5) Uani 1 1 d . . . . .
C1 C 0.9893(3) 0.8094(3) 0.8807(2) 0.0211(7) Uani 1 1 d . . . . .
N1 N 0.9972(3) 0.9012(2) 0.84892(19) 0.0302(6) Uani 1 1 d . . . . .
C2 C 0.6905(3) 0.4881(3) 1.1531(2) 0.0226(7) Uani 1 1 d . . . . .
N2 N 0.5997(3) 0.4798(2) 1.1943(2) 0.0349(7) Uani 1 1 d . . . . .
C3 C 0.7213(3) 0.2521(3) 0.8175(2) 0.0234(7) Uani 1 1 d . . . . .
N3 N 0.6451(3) 0.1834(2) 0.7648(2) 0.0372(7) Uani 1 1 d . . . . .
N1A N 0.6781(2) 0.8490(2) 0.68716(16) 0.0186(5) Uani 1 1 d . . . . .
C11 C 0.7388(3) 0.7505(3) 0.67945(19) 0.0222(7) Uani 1 1 d . . . . .
H11A H 0.697505 0.685973 0.722698 0.027 Uiso 1 1 calc R U . . .
H11B H 0.837264 0.793620 0.695313 0.027 Uiso 1 1 calc R U . . .
C12 C 0.7198(3) 0.6815(3) 0.5893(2) 0.0244(7) Uani 1 1 d . . . . .
H12A H 0.753440 0.745109 0.544522 0.029 Uiso 1 1 calc R U . . .
H12B H 0.621919 0.629516 0.575431 0.029 Uiso 1 1 calc R U . . .
C13 C 0.7968(3) 0.5947(3) 0.5863(2) 0.0302(8) Uani 1 1 d . . . . .
H13A H 0.895307 0.647940 0.596085 0.036 Uiso 1 1 calc R U . . .
H13B H 0.768205 0.536055 0.634323 0.036 Uiso 1 1 calc R U . . .
C14 C 0.7722(4) 0.5161(3) 0.4992(2) 0.0369(9) Uani 1 1 d . . . . .
H14A H 0.828013 0.466576 0.499023 0.055 Uiso 1 1 calc R U . . .
H14B H 0.796554 0.573446 0.451122 0.055 Uiso 1 1 calc R U . . .
H14C H 0.676032 0.457652 0.491517 0.055 Uiso 1 1 calc R U . . .
C21 C 0.5252(3) 0.7798(3) 0.6672(2) 0.0227(7) Uani 1 1 d . . . . .
H21A H 0.509256 0.752393 0.603989 0.027 Uiso 1 1 calc R U . . .
H21B H 0.491000 0.701553 0.700133 0.027 Uiso 1 1 calc R U . . .
C22 C 0.4422(3) 0.8569(3) 0.6892(2) 0.0246(7) Uani 1 1 d . . . . .
H22A H 0.480493 0.939900 0.661923 0.030 Uiso 1 1 calc R U . . .
H22B H 0.444755 0.873784 0.753413 0.030 Uiso 1 1 calc R U . . .
C23 C 0.2955(3) 0.7797(3) 0.6540(2) 0.0313(8) Uani 1 1 d . . . . .
H23A H 0.293553 0.768680 0.589299 0.038 Uiso 1 1 calc R U . . .
H23B H 0.261379 0.693804 0.677231 0.038 Uiso 1 1 calc R U . . .
C24 C 0.2029(3) 0.8448(3) 0.6796(2) 0.0368(9) Uani 1 1 d . . . . .
H24A H 0.109095 0.789503 0.660106 0.055 Uiso 1 1 calc R U . . .
H24B H 0.230958 0.926207 0.651754 0.055 Uiso 1 1 calc R U . . .
H24C H 0.208969 0.860759 0.743405 0.055 Uiso 1 1 calc R U . . .
C31 C 0.7361(3) 0.9522(3) 0.6223(2) 0.0207(6) Uani 1 1 d . . . . .
H31A H 0.700639 1.018311 0.634664 0.025 Uiso 1 1 calc R U . . .
H31B H 0.701511 0.913245 0.562580 0.025 Uiso 1 1 calc R U . . .
C32 C 0.8913(3) 1.0182(3) 0.6229(2) 0.0283(7) Uani 1 1 d . . . . .
H32A H 0.928601 0.955024 0.605344 0.034 Uiso 1 1 calc R U . . .
H32B H 0.928482 1.054580 0.682726 0.034 Uiso 1 1 calc R U . . .
C33 C 0.9333(3) 1.1250(3) 0.5590(2) 0.0316(8) Uani 1 1 d . . . . .
H33A H 1.031229 1.152727 0.549130 0.038 Uiso 1 1 calc R U . . .
H33B H 0.882690 1.090220 0.502019 0.038 Uiso 1 1 calc R U . . .
C34 C 0.9082(4) 1.2400(3) 0.5901(3) 0.0649(14) Uani 1 1 d . . . . .
H34A H 0.936918 1.303882 0.546155 0.097 Uiso 1 1 calc R U . . .
H34B H 0.960145 1.276887 0.645635 0.097 Uiso 1 1 calc R U . . .
H34C H 0.811158 1.214006 0.598850 0.097 Uiso 1 1 calc R U . . .
C41 C 0.7094(3) 0.9137(3) 0.77910(19) 0.0194(6) Uani 1 1 d . . . . .
H41A H 0.809329 0.957352 0.788803 0.023 Uiso 1 1 calc R U . . .
H41B H 0.673154 0.980416 0.781905 0.023 Uiso 1 1 calc R U . . .
C42 C 0.6545(3) 0.8284(3) 0.85346(19) 0.0208(6) Uani 1 1 d . . . . .
H42A H 0.702360 0.771225 0.859411 0.025 Uiso 1 1 calc R U . . .
H42B H 0.556499 0.774747 0.841547 0.025 Uiso 1 1 calc R U . . .
C43 C 0.6758(4) 0.9120(3) 0.9374(2) 0.0328(8) Uani 1 1 d . . . . .
H43A H 0.771261 0.975662 0.942452 0.039 Uiso 1 1 calc R U . . .
H43B H 0.616990 0.959360 0.933346 0.039 Uiso 1 1 calc R U . . .
C44 C 0.6455(3) 0.8390(3) 1.0198(2) 0.0322(8) Uani 1 1 d . . . . .
H44A H 0.649515 0.897175 1.070014 0.048 Uiso 1 1 calc R U . . .
H44B H 0.712870 0.803175 1.029704 0.048 Uiso 1 1 calc R U . . .
H44C H 0.554571 0.769634 1.013004 0.048 Uiso 1 1 calc R U . . .
O1 O 0.7194(3) 0.8629(2) 0.41471(15) 0.0469(7) Uani 1 1 d . . . . .
S1 S 0.69748(9) 0.75621(8) 0.34695(6) 0.0343(2) Uani 1 1 d . . . . .
C1S C 0.6887(4) 0.8154(3) 0.2423(2) 0.0333(8) Uani 1 1 d . . . . .
H1SA H 0.662714 0.745088 0.196976 0.050 Uiso 1 1 calc R U . . .
H1SB H 0.777591 0.881425 0.230595 0.050 Uiso 1 1 calc R U . . .
H1SC H 0.620827 0.852049 0.241866 0.050 Uiso 1 1 calc R U . . .
C2S C 0.5224(4) 0.6519(3) 0.3490(2) 0.0438(10) Uani 1 1 d . . . . .
H2SA H 0.499678 0.583837 0.302263 0.066 Uiso 1 1 calc R U . . .
H2SB H 0.466791 0.700380 0.339934 0.066 Uiso 1 1 calc R U . . .
H2SC H 0.504576 0.614066 0.405858 0.066 Uiso 1 1 calc R U . . .

loop_
_atom_site_aniso_label
_atom_site_aniso_U_11
_atom_site_aniso_U_22
_atom_site_aniso_U_33
_atom_site_aniso_U_23
_atom_site_aniso_U_13
_atom_site_aniso_U_12
Mo1 0.01516(12) 0.01195(11) 0.02015(14) 0.00138(10) -0.00118(11) 0.00521(10)
Mo2 0.01482(12) 0.01255(11) 0.02059(14) 0.00055(10) 0.00009(11) 0.00511(10)
Mo3 0.01454(12) 0.01226(11) 0.02017(14) -0.00002(10) -0.00220(11) 0.00464(10)
I1 0.01631(10) 0.01354(9) 0.02738(11) 0.00154(8) 0.00142(9) 0.00385(7)
I2 0.01888(10) 0.01406(9) 0.02530(11) -0.00150(8) 0.00012(9) 0.00668(8)
I3 0.02543(11) 0.01908(10) 0.01945(10) 0.00189(8) -0.00093(9) 0.00796(8)
I4 0.01651(10) 0.01717(9) 0.02948(12) 0.00138(8) -0.00366(9) 0.00760(8)
C1 0.0183(15) 0.0205(15) 0.0234(17) -0.0008(13) -0.0019(14) 0.0071(13)
N1 0.0285(15) 0.0268(14) 0.0363(17) 0.0070(13) 0.0020(14) 0.0118(12)
C2 0.0241(16) 0.0137(14) 0.0285(18) -0.0009(13) -0.0011(15) 0.0066(13)
N2 0.0306(16) 0.0259(14) 0.047(2) 0.0005(14) 0.0142(15) 0.0096(13)
C3 0.0225(16) 0.0184(15) 0.0313(19) -0.0001(14) -0.0040(15) 0.0108(13)
N3 0.0345(17) 0.0278(15) 0.050(2) -0.0122(14) -0.0162(15) 0.0160(13)
N1A 0.0201(13) 0.0175(12) 0.0178(13) 0.0002(10) 0.0001(11) 0.0073(10)
C11 0.0313(17) 0.0174(14) 0.0199(16) -0.0015(13) -0.0016(14) 0.0124(13)
C12 0.0307(18) 0.0191(15) 0.0236(17) -0.0014(13) 0.0001(15) 0.0107(13)
C13 0.0317(18) 0.0254(16) 0.033(2) -0.0053(15) -0.0009(16) 0.0121(14)
C14 0.041(2) 0.0296(18) 0.042(2) -0.0080(17) 0.0013(18) 0.0170(16)
C21 0.0229(16) 0.0174(14) 0.0218(16) 0.0010(13) -0.0017(14) 0.0024(12)
C22 0.0239(16) 0.0230(15) 0.0262(18) -0.0002(14) 0.0034(14) 0.0087(13)
C23 0.0253(17) 0.0260(17) 0.040(2) 0.0011(16) -0.0004(16) 0.0082(14)
C24 0.0295(19) 0.0322(18) 0.047(2) 0.0062(17) 0.0000(18) 0.0101(16)
C31 0.0268(16) 0.0169(14) 0.0178(15) 0.0022(12) 0.0022(14) 0.0080(13)
C32 0.0258(17) 0.0287(17) 0.0271(18) 0.0030(15) 0.0043(15) 0.0075(14)
C33 0.0281(18) 0.0305(18) 0.0285(19) 0.0012(15) 0.0063(16) 0.0037(15)
C34 0.067(3) 0.031(2) 0.097(4) 0.027(2) 0.041(3) 0.015(2)
C41 0.0227(16) 0.0171(14) 0.0162(15) -0.0020(12) 0.0004(13) 0.0063(12)
C42 0.0255(16) 0.0180(14) 0.0192(16) 0.0019(13) -0.0003(14) 0.0091(13)
C43 0.045(2) 0.0251(17) 0.0223(18) -0.0009(14) 0.0016(17) 0.0084(16)
C44 0.041(2) 0.0390(19) 0.0212(18) 0.0026(15) 0.0013(16) 0.0213(17)
O1 0.0755(19) 0.0346(14) 0.0225(13) -0.0022(11) -0.0062(13) 0.0151(14)
S1 0.0439(5) 0.0330(4) 0.0256(5) 0.0044(4) -0.0052(4) 0.0154(4)
C1S 0.043(2) 0.0391(19) 0.0185(17) 0.0058(15) 0.0035(16) 0.0168(17)
C2S 0.053(2) 0.036(2) 0.034(2) 0.0041(17) 0.008(2) 0.0094(18)

_geom_special_details            
;
 All esds (except the esd in the dihedral angle between two l.s. planes)
 are estimated using the full covariance matrix.  The cell esds are taken
 into account individually in the estimation of esds in distances, angles
 and torsion angles; correlations between esds in cell parameters are only
 used when they are defined by crystal symmetry.  An approximate (isotropic)
 treatment of cell esds is used for estimating esds involving l.s. planes.
;

loop_
_geom_bond_atom_site_label_1
_geom_bond_atom_site_label_2
_geom_bond_distance
_geom_bond_site_symmetry_2
_geom_bond_publ_flag
Mo1 Mo2 2.6953(3) 2_767 ?
Mo1 Mo2 2.6856(4) . ?
Mo1 Mo3 2.6851(4) 2_767 ?
Mo1 Mo3 2.6990(3) . ?
Mo1 I1 2.7705(3) . ?
Mo1 I2 2.7789(3) . ?
Mo1 I3 2.7751(3) . ?
Mo1 I4 2.7907(3) . ?
Mo1 C1 2.201(3) . ?
Mo2 Mo3 2.6832(4) . ?
Mo2 Mo3 2.6883(4) 2_767 ?
Mo2 I1 2.7746(3) 2_767 ?
Mo2 I2 2.7823(3) . ?
Mo2 I3 2.7747(3) 2_767 ?
Mo2 I4 2.7832(3) . ?
Mo2 C2 2.194(3) . ?
Mo3 I1 2.7809(3) 2_767 ?
Mo3 I2 2.7833(3) 2_767 ?
Mo3 I3 2.7679(4) . ?
Mo3 I4 2.7758(3) . ?
Mo3 C3 2.193(3) . ?
C1 N1 1.153(4) . ?
C2 N2 1.152(4) . ?
C3 N3 1.150(4) . ?
N1A C11 1.518(3) . ?
N1A C21 1.527(3) . ?
N1A C31 1.524(4) . ?
N1A C41 1.520(3) . ?
C11 H11A 0.9900 . ?
C11 H11B 0.9900 . ?
C11 C12 1.522(4) . ?
C12 H12A 0.9900 . ?
C12 H12B 0.9900 . ?
C12 C13 1.532(4) . ?
C13 H13A 0.9900 . ?
C13 H13B 0.9900 . ?
C13 C14 1.525(4) . ?
C14 H14A 0.9800 . ?
C14 H14B 0.9800 . ?
C14 H14C 0.9800 . ?
C21 H21A 0.9900 . ?
C21 H21B 0.9900 . ?
C21 C22 1.524(4) . ?
C22 H22A 0.9900 . ?
C22 H22B 0.9900 . ?
C22 C23 1.532(4) . ?
C23 H23A 0.9900 . ?
C23 H23B 0.9900 . ?
C23 C24 1.517(4) . ?
C24 H24A 0.9800 . ?
C24 H24B 0.9800 . ?
C24 H24C 0.9800 . ?
C31 H31A 0.9900 . ?
C31 H31B 0.9900 . ?
C31 C32 1.532(4) . ?
C32 H32A 0.9900 . ?
C32 H32B 0.9900 . ?
C32 C33 1.533(4) . ?
C33 H33A 0.9900 . ?
C33 H33B 0.9900 . ?
C33 C34 1.507(5) . ?
C34 H34A 0.9800 . ?
C34 H34B 0.9800 . ?
C34 H34C 0.9800 . ?
C41 H41A 0.9900 . ?
C41 H41B 0.9900 . ?
C41 C42 1.509(4) . ?
C42 H42A 0.9900 . ?
C42 H42B 0.9900 . ?
C42 C43 1.518(4) . ?
C43 H43A 0.9900 . ?
C43 H43B 0.9900 . ?
C43 C44 1.516(4) . ?
C44 H44A 0.9800 . ?
C44 H44B 0.9800 . ?
C44 H44C 0.9800 . ?
O1 S1 1.501(2) . ?
S1 C1S 1.783(3) . ?
S1 C2S 1.781(4) . ?
C1S H1SA 0.9800 . ?
C1S H1SB 0.9800 . ?
C1S H1SC 0.9800 . ?
C2S H2SA 0.9800 . ?
C2S H2SB 0.9800 . ?
C2S H2SC 0.9800 . ?

loop_
_geom_angle_atom_site_label_1
_geom_angle_atom_site_label_2
_geom_angle_atom_site_label_3
_geom_angle
_geom_angle_site_symmetry_1
_geom_angle_site_symmetry_3
_geom_angle_publ_flag
Mo2 Mo1 Mo2 89.731(11) . 2_767 ?
Mo2 Mo1 Mo3 59.783(9) 2_767 . ?
Mo2 Mo1 Mo3 59.777(10) . . ?
Mo2 Mo1 I1 60.994(9) 2_767 . ?
Mo2 Mo1 I1 121.338(12) . . ?
Mo2 Mo1 I2 61.189(9) . . ?
Mo2 Mo1 I2 121.040(11) 2_767 . ?
Mo2 Mo1 I3 60.938(9) 2_767 . ?
Mo2 Mo1 I3 120.499(11) . . ?
Mo2 Mo1 I4 61.056(9) . . ?
Mo2 Mo1 I4 120.494(11) 2_767 . ?
Mo3 Mo1 Mo2 59.828(10) 2_767 2_767 ?
Mo3 Mo1 Mo2 60.073(10) 2_767 . ?
Mo3 Mo1 Mo3 89.801(11) 2_767 . ?
Mo3 Mo1 I1 61.267(9) 2_767 . ?
Mo3 Mo1 I1 120.766(11) . . ?
Mo3 Mo1 I2 61.216(9) 2_767 . ?
Mo3 Mo1 I2 120.961(12) . . ?
Mo3 Mo1 I3 60.728(9) . . ?
Mo3 Mo1 I3 120.762(11) 2_767 . ?
Mo3 Mo1 I4 60.719(9) . . ?
Mo3 Mo1 I4 121.127(11) 2_767 . ?
I1 Mo1 I2 90.417(10) . . ?
I1 Mo1 I3 89.782(10) . . ?
I1 Mo1 I4 177.500(11) . . ?
I2 Mo1 I4 90.316(10) . . ?
I3 Mo1 I2 177.743(11) . . ?
I3 Mo1 I4 89.392(10) . . ?
C1 Mo1 Mo2 133.99(8) . 2_767 ?
C1 Mo1 Mo2 136.17(8) . . ?
C1 Mo1 Mo3 132.45(8) . 2_767 ?
C1 Mo1 Mo3 137.73(8) . . ?
C1 Mo1 I1 86.05(8) . . ?
C1 Mo1 I2 87.65(8) . . ?
C1 Mo1 I3 90.12(8) . . ?
C1 Mo1 I4 91.59(8) . . ?
Mo1 Mo2 Mo1 90.269(10) . 2_767 ?
Mo1 Mo2 Mo3 59.955(10) . 2_767 ?
Mo1 Mo2 I1 60.841(9) 2_767 2_767 ?
Mo1 Mo2 I1 121.592(11) . 2_767 ?
Mo1 Mo2 I2 61.059(9) . . ?
Mo1 Mo2 I2 121.300(11) 2_767 . ?
Mo1 Mo2 I3 60.951(9) 2_767 2_767 ?
Mo1 Mo2 I3 120.807(11) . 2_767 ?
Mo1 Mo2 I4 61.337(9) . . ?
Mo1 Mo2 I4 120.887(11) 2_767 . ?
Mo3 Mo2 Mo1 59.899(9) . 2_767 ?
Mo3 Mo2 Mo1 60.177(9) 2_767 2_767 ?
Mo3 Mo2 Mo1 60.359(9) . . ?
Mo3 Mo2 Mo3 90.069(11) . 2_767 ?
Mo3 Mo2 I1 61.237(9) . 2_767 ?
Mo3 Mo2 I1 121.006(11) 2_767 2_767 ?
Mo3 Mo2 I2 61.133(9) 2_767 . ?
Mo3 Mo2 I2 121.413(12) . . ?
Mo3 Mo2 I3 60.860(9) 2_767 2_767 ?
Mo3 Mo2 I3 120.847(11) . 2_767 ?
Mo3 Mo2 I4 61.000(9) . . ?
Mo3 Mo2 I4 121.290(11) 2_767 . ?
I1 Mo2 I2 177.033(11) 2_767 . ?
I1 Mo2 I3 89.704(10) 2_767 2_767 ?
I1 Mo2 I4 89.972(10) 2_767 . ?
I2 Mo2 I4 90.400(10) . . ?
I3 Mo2 I2 89.799(11) 2_767 . ?
I3 Mo2 I4 177.538(11) 2_767 . ?
C2 Mo2 Mo1 134.70(8) . 2_767 ?
C2 Mo2 Mo1 135.01(8) . . ?
C2 Mo2 Mo3 133.90(8) . . ?
C2 Mo2 Mo3 136.03(8) . 2_767 ?
C2 Mo2 I1 87.70(7) . 2_767 ?
C2 Mo2 I2 89.37(7) . . ?
C2 Mo2 I3 89.53(8) . 2_767 ?
C2 Mo2 I4 88.02(8) . . ?
Mo1 Mo3 Mo1 90.199(11) 2_767 . ?
Mo1 Mo3 Mo2 59.972(10) 2_767 2_767 ?
Mo1 Mo3 I1 60.879(9) 2_767 2_767 ?
Mo1 Mo3 I1 120.862(12) . 2_767 ?
Mo1 Mo3 I2 61.052(9) 2_767 2_767 ?
Mo1 Mo3 I2 121.132(11) . 2_767 ?
Mo1 Mo3 I3 60.996(9) . . ?
Mo1 Mo3 I3 121.078(11) 2_767 . ?
Mo1 Mo3 I4 61.275(9) . . ?
Mo1 Mo3 I4 121.540(11) 2_767 . ?
Mo2 Mo3 Mo1 60.040(9) 2_767 . ?
Mo2 Mo3 Mo1 59.864(10) . . ?
Mo2 Mo3 Mo1 60.274(10) . 2_767 ?
Mo2 Mo3 Mo2 89.931(12) . 2_767 ?
Mo2 Mo3 I1 61.002(9) . 2_767 ?
Mo2 Mo3 I1 120.850(12) 2_767 2_767 ?
Mo2 Mo3 I2 61.101(8) 2_767 2_767 ?
Mo2 Mo3 I2 121.323(11) . 2_767 ?
Mo2 Mo3 I3 61.114(9) 2_767 . ?
Mo2 Mo3 I3 120.853(11) . . ?
Mo2 Mo3 I4 61.278(9) . . ?
Mo2 Mo3 I4 121.306(11) 2_767 . ?
I1 Mo3 I2 90.111(9) 2_767 2_767 ?
I3 Mo3 I1 177.659(11) . 2_767 ?
I3 Mo3 I2 89.921(10) . 2_767 ?
I3 Mo3 I4 89.847(10) . . ?
I4 Mo3 I1 89.995(10) . 2_767 ?
I4 Mo3 I2 176.932(11) . 2_767 ?
C3 Mo3 Mo1 134.49(8) . . ?
C3 Mo3 Mo1 135.31(8) . 2_767 ?
C3 Mo3 Mo2 134.61(8) . 2_767 ?
C3 Mo3 Mo2 135.45(8) . . ?
C3 Mo3 I1 89.56(8) . 2_767 ?
C3 Mo3 I2 88.61(8) . 2_767 ?
C3 Mo3 I3 88.10(8) . . ?
C3 Mo3 I4 88.32(8) . . ?
Mo1 I1 Mo2 58.165(9) . 2_767 ?
Mo1 I1 Mo3 57.853(9) . 2_767 ?
Mo2 I1 Mo3 57.761(9) 2_767 2_767 ?
Mo1 I2 Mo2 57.752(9) . . ?
Mo1 I2 Mo3 57.731(8) . 2_767 ?
Mo2 I2 Mo3 57.766(8) . 2_767 ?
Mo2 I3 Mo1 58.110(9) 2_767 . ?
Mo3 I3 Mo1 58.276(9) . . ?
Mo3 I3 Mo2 58.028(8) . 2_767 ?
Mo2 I4 Mo1 57.608(9) . . ?
Mo3 I4 Mo1 58.006(8) . . ?
Mo3 I4 Mo2 57.721(8) . . ?
N1 C1 Mo1 175.8(3) . . ?
N2 C2 Mo2 177.5(3) . . ?
N3 C3 Mo3 178.8(3) . . ?
C11 N1A C21 107.8(2) . . ?
C11 N1A C31 111.9(2) . . ?
C11 N1A C41 109.4(2) . . ?
C31 N1A C21 108.5(2) . . ?
C41 N1A C21 111.2(2) . . ?
C41 N1A C31 108.0(2) . . ?
N1A C11 H11A 108.5 . . ?
N1A C11 H11B 108.5 . . ?
N1A C11 C12 115.1(2) . . ?
H11A C11 H11B 107.5 . . ?
C12 C11 H11A 108.5 . . ?
C12 C11 H11B 108.5 . . ?
C11 C12 H12A 109.5 . . ?
C11 C12 H12B 109.5 . . ?
C11 C12 C13 110.8(3) . . ?
H12A C12 H12B 108.1 . . ?
C13 C12 H12A 109.5 . . ?
C13 C12 H12B 109.5 . . ?
C12 C13 H13A 109.1 . . ?
C12 C13 H13B 109.1 . . ?
H13A C13 H13B 107.8 . . ?
C14 C13 C12 112.6(3) . . ?
C14 C13 H13A 109.1 . . ?
C14 C13 H13B 109.1 . . ?
C13 C14 H14A 109.5 . . ?
C13 C14 H14B 109.5 . . ?
C13 C14 H14C 109.5 . . ?
H14A C14 H14B 109.5 . . ?
H14A C14 H14C 109.5 . . ?
H14B C14 H14C 109.5 . . ?
N1A C21 H21A 108.4 . . ?
N1A C21 H21B 108.4 . . ?
H21A C21 H21B 107.4 . . ?
C22 C21 N1A 115.7(2) . . ?
C22 C21 H21A 108.4 . . ?
C22 C21 H21B 108.4 . . ?
C21 C22 H22A 110.0 . . ?
C21 C22 H22B 110.0 . . ?
C21 C22 C23 108.4(2) . . ?
H22A C22 H22B 108.4 . . ?
C23 C22 H22A 110.0 . . ?
C23 C22 H22B 110.0 . . ?
C22 C23 H23A 109.2 . . ?
C22 C23 H23B 109.2 . . ?
H23A C23 H23B 107.9 . . ?
C24 C23 C22 111.9(3) . . ?
C24 C23 H23A 109.2 . . ?
C24 C23 H23B 109.2 . . ?
C23 C24 H24A 109.5 . . ?
C23 C24 H24B 109.5 . . ?
C23 C24 H24C 109.5 . . ?
H24A C24 H24B 109.5 . . ?
H24A C24 H24C 109.5 . . ?
H24B C24 H24C 109.5 . . ?
N1A C31 H31A 108.3 . . ?
N1A C31 H31B 108.3 . . ?
N1A C31 C32 116.0(2) . . ?
H31A C31 H31B 107.4 . . ?
C32 C31 H31A 108.3 . . ?
C32 C31 H31B 108.3 . . ?
C31 C32 H32A 109.7 . . ?
C31 C32 H32B 109.7 . . ?
C31 C32 C33 109.7(3) . . ?
H32A C32 H32B 108.2 . . ?
C33 C32 H32A 109.7 . . ?
C33 C32 H32B 109.7 . . ?
C32 C33 H33A 108.8 . . ?
C32 C33 H33B 108.8 . . ?
H33A C33 H33B 107.7 . . ?
C34 C33 C32 114.0(3) . . ?
C34 C33 H33A 108.8 . . ?
C34 C33 H33B 108.8 . . ?
C33 C34 H34A 109.5 . . ?
C33 C34 H34B 109.5 . . ?
C33 C34 H34C 109.5 . . ?
H34A C34 H34B 109.5 . . ?
H34A C34 H34C 109.5 . . ?
H34B C34 H34C 109.5 . . ?
N1A C41 H41A 108.2 . . ?
N1A C41 H41B 108.2 . . ?
H41A C41 H41B 107.3 . . ?
C42 C41 N1A 116.5(2) . . ?
C42 C41 H41A 108.2 . . ?
C42 C41 H41B 108.2 . . ?
C41 C42 H42A 110.0 . . ?
C41 C42 H42B 110.0 . . ?
C41 C42 C43 108.6(2) . . ?
H42A C42 H42B 108.4 . . ?
C43 C42 H42A 110.0 . . ?
C43 C42 H42B 110.0 . . ?
C42 C43 H43A 108.7 . . ?
C42 C43 H43B 108.7 . . ?
H43A C43 H43B 107.6 . . ?
C44 C43 C42 114.2(3) . . ?
C44 C43 H43A 108.7 . . ?
C44 C43 H43B 108.7 . . ?
C43 C44 H44A 109.5 . . ?
C43 C44 H44B 109.5 . . ?
C43 C44 H44C 109.5 . . ?
H44A C44 H44B 109.5 . . ?
H44A C44 H44C 109.5 . . ?
H44B C44 H44C 109.5 . . ?
O1 S1 C1S 107.31(15) . . ?
O1 S1 C2S 105.51(16) . . ?
C2S S1 C1S 97.00(17) . . ?
S1 C1S H1SA 109.5 . . ?
S1 C1S H1SB 109.5 . . ?
S1 C1S H1SC 109.5 . . ?
H1SA C1S H1SB 109.5 . . ?
H1SA C1S H1SC 109.5 . . ?
H1SB C1S H1SC 109.5 . . ?
S1 C2S H2SA 109.5 . . ?
S1 C2S H2SB 109.5 . . ?
S1 C2S H2SC 109.5 . . ?
H2SA C2S H2SB 109.5 . . ?
H2SA C2S H2SC 109.5 . . ?
H2SB C2S H2SC 109.5 . . ?

_refine_diff_density_max         1.305
_refine_diff_density_min         -0.568
_refine_diff_density_rms         0.109

_shelx_res_file                  
;
TITL ys1831 in P-1; 150K; Xcalibur
    ys1831.res
    created by SHELXL-2018/3 at 15:59:54 on 20-Nov-2019
CELL  0.71073  10.7807  11.4600  15.2964   92.784   91.598  113.849
ZERR    1.000   0.0004   0.0005   0.0007    0.004    0.003    0.004
LATT  1
SFAC C  H  N O S MO I
UNIT 42 84 8 2 2 6  8
 
LIST 4 ! automatically inserted. Change 6 to 4 for CHECKCIF!!
TEMP -123
 
L.S. 6
BOND $H
FMAP 2
PLAN 5
 
OMIT 0
 
ACTA 51
 
SIZE 0.15 0.14 0.07
 
WGHT    0.017500
FVAR       1.23629
MO1   6    0.990386    0.640969    0.943407    11.00000    0.01516    0.01195 =
         0.02015    0.00138   -0.00118    0.00521
MO2   6    0.857603    0.495919    1.071694    11.00000    0.01482    0.01255 =
         0.02059    0.00055    0.00009    0.00511
MO3   6    0.870032    0.384144    0.915876    11.00000    0.01454    0.01226 =
         0.02017   -0.00002   -0.00220    0.00464
I1    7    1.270774    0.768298    0.953180    11.00000    0.01631    0.01354 =
         0.02738    0.00154    0.00142    0.00385
I2    7    0.976771    0.760359    1.103153    11.00000    0.01888    0.01406 =
         0.02530   -0.00150    0.00012    0.00668
I3    7    1.002203    0.529203    0.780563    11.00000    0.02543    0.01908 =
         0.01945    0.00189   -0.00093    0.00796
I4    7    0.707516    0.519641    0.927886    11.00000    0.01651    0.01717 =
         0.02948    0.00138   -0.00366    0.00760
C1    1    0.989273    0.809410    0.880677    11.00000    0.01834    0.02048 =
         0.02341   -0.00075   -0.00189    0.00713
N1    3    0.997228    0.901213    0.848923    11.00000    0.02854    0.02682 =
         0.03634    0.00703    0.00195    0.01178
C2    1    0.690461    0.488143    1.153121    11.00000    0.02407    0.01374 =
         0.02850   -0.00090   -0.00110    0.00658
N2    3    0.599720    0.479827    1.194274    11.00000    0.03057    0.02593 =
         0.04703    0.00054    0.01418    0.00962
C3    1    0.721328    0.252080    0.817485    11.00000    0.02251    0.01841 =
         0.03129   -0.00012   -0.00398    0.01080
N3    3    0.645117    0.183351    0.764795    11.00000    0.03454    0.02775 =
         0.04976   -0.01225   -0.01615    0.01602
N1A   3    0.678139    0.849001    0.687159    11.00000    0.02007    0.01754 =
         0.01780    0.00022    0.00011    0.00732
C11   1    0.738778    0.750484    0.679449    11.00000    0.03125    0.01743 =
         0.01992   -0.00153   -0.00162    0.01237
AFIX  23
H11A  2    0.697505    0.685973    0.722698    11.00000   -1.20000
H11B  2    0.837264    0.793620    0.695313    11.00000   -1.20000
AFIX   0
C12   1    0.719792    0.681509    0.589282    11.00000    0.03070    0.01913 =
         0.02360   -0.00144    0.00013    0.01073
AFIX  23
H12A  2    0.753440    0.745109    0.544522    11.00000   -1.20000
H12B  2    0.621919    0.629516    0.575431    11.00000   -1.20000
AFIX   0
C13   1    0.796848    0.594680    0.586260    11.00000    0.03167    0.02541 =
         0.03310   -0.00529   -0.00093    0.01215
AFIX  23
H13A  2    0.895307    0.647940    0.596085    11.00000   -1.20000
H13B  2    0.768205    0.536055    0.634323    11.00000   -1.20000
AFIX   0
C14   1    0.772156    0.516065    0.499202    11.00000    0.04085    0.02961 =
         0.04156   -0.00801    0.00129    0.01702
AFIX 137
H14A  2    0.828013    0.466576    0.499023    11.00000   -1.50000
H14B  2    0.796554    0.573446    0.451122    11.00000   -1.50000
H14C  2    0.676032    0.457652    0.491517    11.00000   -1.50000
AFIX   0
C21   1    0.525246    0.779754    0.667187    11.00000    0.02291    0.01739 =
         0.02184    0.00099   -0.00173    0.00237
AFIX  23
H21A  2    0.509256    0.752393    0.603989    11.00000   -1.20000
H21B  2    0.491000    0.701553    0.700133    11.00000   -1.20000
AFIX   0
C22   1    0.442193    0.856854    0.689157    11.00000    0.02394    0.02296 =
         0.02619   -0.00016    0.00345    0.00875
AFIX  23
H22A  2    0.480493    0.939900    0.661923    11.00000   -1.20000
H22B  2    0.444755    0.873784    0.753413    11.00000   -1.20000
AFIX   0
C23   1    0.295521    0.779747    0.653987    11.00000    0.02534    0.02598 =
         0.04025    0.00113   -0.00036    0.00821
AFIX  23
H23A  2    0.293553    0.768680    0.589299    11.00000   -1.20000
H23B  2    0.261379    0.693804    0.677231    11.00000   -1.20000
AFIX   0
C24   1    0.202946    0.844810    0.679577    11.00000    0.02955    0.03217 =
         0.04667    0.00624    0.00000    0.01013
AFIX 137
H24A  2    0.109095    0.789503    0.660106    11.00000   -1.50000
H24B  2    0.230958    0.926207    0.651754    11.00000   -1.50000
H24C  2    0.208969    0.860759    0.743405    11.00000   -1.50000
AFIX   0
C31   1    0.736063    0.952174    0.622329    11.00000    0.02682    0.01690 =
         0.01777    0.00222    0.00223    0.00802
AFIX  23
H31A  2    0.700639    1.018311    0.634664    11.00000   -1.20000
H31B  2    0.701511    0.913245    0.562580    11.00000   -1.20000
AFIX   0
C32   1    0.891308    1.018195    0.622870    11.00000    0.02581    0.02873 =
         0.02711    0.00298    0.00433    0.00747
AFIX  23
H32A  2    0.928601    0.955024    0.605344    11.00000   -1.20000
H32B  2    0.928482    1.054580    0.682726    11.00000   -1.20000
AFIX   0
C33   1    0.933326    1.125023    0.558989    11.00000    0.02814    0.03052 =
         0.02852    0.00122    0.00629    0.00372
AFIX  23
H33A  2    1.031229    1.152727    0.549130    11.00000   -1.20000
H33B  2    0.882690    1.090220    0.502019    11.00000   -1.20000
AFIX   0
C34   1    0.908188    1.240004    0.590131    11.00000    0.06747    0.03097 =
         0.09654    0.02687    0.04087    0.01537
AFIX 137
H34A  2    0.936918    1.303882    0.546155    11.00000   -1.50000
H34B  2    0.960145    1.276887    0.645635    11.00000   -1.50000
H34C  2    0.811158    1.214006    0.598850    11.00000   -1.50000
AFIX   0
C41   1    0.709447    0.913655    0.779104    11.00000    0.02269    0.01708 =
         0.01621   -0.00204    0.00041    0.00629
AFIX  23
H41A  2    0.809329    0.957352    0.788803    11.00000   -1.20000
H41B  2    0.673154    0.980416    0.781905    11.00000   -1.20000
AFIX   0
C42   1    0.654481    0.828369    0.853460    11.00000    0.02548    0.01803 =
         0.01923    0.00191   -0.00025    0.00911
AFIX  23
H42A  2    0.702360    0.771225    0.859411    11.00000   -1.20000
H42B  2    0.556499    0.774747    0.841547    11.00000   -1.20000
AFIX   0
C43   1    0.675815    0.911995    0.937399    11.00000    0.04502    0.02505 =
         0.02235   -0.00088    0.00157    0.00837
AFIX  23
H43A  2    0.771261    0.975662    0.942452    11.00000   -1.20000
H43B  2    0.616990    0.959360    0.933346    11.00000   -1.20000
AFIX   0
C44   1    0.645513    0.839043    1.019820    11.00000    0.04130    0.03902 =
         0.02124    0.00259    0.00130    0.02127
AFIX 137
H44A  2    0.649515    0.897175    1.070014    11.00000   -1.50000
H44B  2    0.712870    0.803175    1.029704    11.00000   -1.50000
H44C  2    0.554571    0.769634    1.013004    11.00000   -1.50000
AFIX   0
O1    4    0.719391    0.862860    0.414707    11.00000    0.07546    0.03459 =
         0.02251   -0.00221   -0.00617    0.01511
S1    5    0.697483    0.756205    0.346955    11.00000    0.04394    0.03296 =
         0.02563    0.00443   -0.00523    0.01538
C1S   1    0.688661    0.815352    0.242316    11.00000    0.04300    0.03914 =
         0.01850    0.00583    0.00349    0.01685
AFIX 137
H1SA  2    0.662714    0.745088    0.196976    11.00000   -1.50000
H1SB  2    0.777591    0.881425    0.230595    11.00000   -1.50000
H1SC  2    0.620827    0.852049    0.241866    11.00000   -1.50000
AFIX   0
C2S   1    0.522445    0.651889    0.348980    11.00000    0.05256    0.03649 =
         0.03444    0.00408    0.00816    0.00944
AFIX 137
H2SA  2    0.499678    0.583837    0.302263    11.00000   -1.50000
H2SB  2    0.466791    0.700380    0.339934    11.00000   -1.50000
H2SC  2    0.504576    0.614066    0.405858    11.00000   -1.50000
AFIX   0
HKLF 4
 
 
 
 
REM  ys1831 in P-1; 150K; Xcalibur
REM wR2 = 0.0479, GooF = S = 0.992, Restrained GooF = 0.992 for all data
REM R1 = 0.0215 for 6675 Fo > 4sig(Fo) and 0.0289 for all 7839 data
REM 313 parameters refined using 0 restraints
 
END
 
WGHT      0.0175      0.0000
 
REM Highest difference peak  1.305,  deepest hole -0.568,  1-sigma level  0.109
Q1    1   0.4715  0.8825  0.4479  11.00000  0.05    1.31
Q2    1   1.1593  0.7609  0.9706  11.00000  0.05    0.50
Q3    1   0.9945  0.5434  1.0605  11.00000  0.05    0.46
Q4    1   0.7645  0.4590  0.8272  11.00000  0.05    0.46
Q5    1   0.9180  0.6115  1.0043  11.00000  0.05    0.46
;
_shelx_res_checksum              45335

_shelx_hkl_file                  
;
   0   0   2 41788.6 621.193   3
   0   0  -2 41545.8 623.715   3
   0   0  -3 13775.5 286.567   3
   0   0   3 13542.1 279.897   3
   0   0   4 17220.5 361.928   3
   0   0  -4 17563.3 367.964   3
   0   0   5 27358.2 538.228   3
   0   0  -5 28250.5 541.052   3
   0   0  -6 114739. 1726.19   3
   0   0   6 114715. 1731.23   3
   0   0   7 170295. 2505.11   3
   0   0  -7 172847. 2507.87   3
   0   0  -8 59564.2 1072.46   3
   0   0   8 60527.2 1068.31   3
   0   0  -9 596.237 92.9583   3
   0   0 -10 1099.58 126.570   3
   0   0 -11 5880.08 283.317   3
   0   0 -12 939.347 124.036   3
   0   0 -12 848.159 110.091   1
   0   0 -13 5546.24 309.605   3
   0   0 -13 5102.29 261.984   1
   0   0 -14 8851.69 359.336   1
   0   0 -14 8845.74 401.228   3
   0   0 -15 402.743 101.355   3
   0   0 -15 333.731 85.4022   1
   0   0 -16 387.787 108.175   3
   0   0 -16 534.018 104.100   1
   0   0 -17 551.033 128.746   3
   0   0 -17 484.276 104.912   4
   0   0 -17 506.348 112.650   1
   0   0 -18 2801.05 232.956   1
   0   0 -18 2655.02 233.629   4
   0   0 -18 2599.67 256.664   3
   0   0 -19 911.902 160.878   3
   0   0 -19 1112.70 164.635   4
   0   0 -20-46.9006 90.1293   3
   0   1 -20 5700.32 374.601   4
   0   1 -19 2173.93 229.123   4
   0   1 -19 1657.54 204.255   3
   0   1 -18 606.734 122.885   4
   0   1 -18 705.333 124.193   1
   0   1 -18 625.044 123.850   3
   0   1 -17 324.661 91.0032   1
   0   1 -17 368.079 100.012   4
   0   1 -17 358.675 109.006   3
   0   1 -16 190.279 76.4461   4
   0   1 -16 121.469 79.8975   3
   0   1 -16 124.827 67.8698   1
   0   1 -15 21626.1 659.283   3
   0   1 -15 21170.0 638.884   4
   0   1 -14 64663.9 1293.71   3
   0   1 -13 66891.5 1295.27   3
   0   1 -12 49642.3 1026.81   3
   0   1 -11 2343.81 176.978   3
   0   1 -10 228.856 65.5215   3
   0  -1   9 13009.3 371.596   3
   0   1  -9 11751.3 375.165   3
   0   1  -8 118080. 1844.67   3
   0  -1   8 123168. 1836.48   3
   0   1  -7 273217. 3775.40   3
   0  -1   7 270725. 3758.94   3
   0   1  -6 167121. 2346.11   3
   0  -1   6 161498. 2319.62   3
   0   1  -5 45580.8 747.385   3
   0  -1   5 45005.7 732.350   3
   0   1  -4 7000.52 181.566   3
   0  -1   4 7169.18 176.833   3
   0   1  -3 1190.73 51.0265   3
   0  -1   3 1253.36 57.0276   3
   0   1  -2 16651.4 296.517   4
   0   1  -1 89478.8 1200.21   2
   0  -1   1 87424.6 1199.82   2
   0   1  -1 88081.8 1200.57   4
   0  -1   1 86797.6 1201.57   4
   0   1   0 121242. 1625.82   1
   0  -1  -1 96673.1 1360.49   3
   0   1   1 99088.4 1330.81   4
   0  -1  -1 100019. 1343.57   1
   0   1   1 100644. 1345.08   1
   0   1   1 99674.4 1362.79   3
   0  -1  -1 97660.0 1330.22   4
   0   1   2 8731.29 181.090   1
   0  -1  -2 8741.15 208.129   3
   0  -1  -2 9148.80 182.357   1
   0   1   2 8891.00 212.279   3
   0  -1  -3 5023.57 166.833   3
   0   1   3 4575.38 174.458   3
   0  -1  -3 5004.26 137.678   1
   0   1   3 5191.10 138.262   1
   0  -1  -4 17550.5 338.333   1
   0   1   4 17469.1 398.607   3
   0  -1  -4 17273.0 387.843   3
   0   1   5 1099.87 96.6895   3
   0  -1  -5 1126.35 75.7026   1
   0  -1  -5 1220.55 105.498   3
   0  -1  -6 4529.00 166.420   1
   0   1   6 4648.87 205.988   3
   0  -1  -6 4386.36 202.062   3
   0  -1  -7 6332.58 209.192   1
   0   1   7 6442.20 259.217   3
   0  -1  -7 5753.31 246.435   3
   0  -1  -8 32.6081 34.5191   1
   0  -1  -8 26.3384 49.9385   3
   0  -1  -9 318.988 61.4459   1
   0  -1  -9 416.466 93.1773   3
   0  -1 -10 1139.76 134.362   3
   0  -1 -10 1367.45 114.964   1
   0  -1 -11 2816.01 209.080   3
   0  -1 -11 3135.17 184.668   1
   0  -1 -12 11170.6 371.595   1
   0  -1 -12 9742.41 421.864   3
   0  -1 -13 42.7992 76.2146   3
   0  -1 -13 47.3967 44.8233   1
   0  -1 -14 2744.87 236.686   3
   0  -1 -14 3018.04 200.302   1
   0  -1 -15 9.13748 52.0680   1
   0  -1 -15-18.9623 76.9663   3
   0  -1 -16 684.959 133.652   3
   0  -1 -16 677.212 110.636   1
   0  -1 -17 24.3685 58.6021   1
   0  -1 -17 55.9472 72.7651   3
   0  -1 -18-34.0896 88.4468   3
   0  -1 -19-99.5534 94.8952   3
   0  -1 -20 897.504 181.524   3
   0   2 -20 22797.0 804.197   4
   0   2 -19 8312.19 451.051   4
   0   2 -19 8589.63 432.695   1
   0   2 -18 1565.84 187.239   3
   0   2 -18 1841.96 195.849   1
   0   2 -18 1435.89 184.425   4
   0   2 -17 146.127 83.6756   4
   0   2 -17 19.2357 61.6733   3
   0   2 -16 3622.78 255.058   3
   0   2 -16 3465.63 264.879   4
   0   2 -15 13170.7 478.001   3
   0   2 -15 12068.9 476.830   4
   0   2 -14 64458.7 1253.04   3
   0   2 -14 62524.5 1274.92   4
   0   2 -13 67361.5 1307.42   4
   0   2 -13 68277.7 1285.04   3
   0   2 -12 8450.55 339.069   3
   0   2 -12 8389.99 346.993   4
   0   2 -11 441.605 79.8682   4
   0   2 -11 534.398 86.3808   3
   0   2 -10 13.7989 42.0320   3
   0   2 -10-15.2677 45.1942   4
   0  -2  10 26.5765 32.3479   3
   0  -2   9 3243.37 161.607   3
   0   2  -9 3908.70 191.192   3
   0   2  -8 12464.8 340.552   3
   0  -2   8 12123.9 318.191   3
   0  -2   7 31162.8 578.715   3
   0   2  -7 32279.5 614.358   3
   0   2  -7 33675.3 655.555   4
   0   2  -6 46907.0 821.589   4
   0  -2   6 46386.7 744.797   3
   0   2  -6 46898.5 767.959   3
   0  -2   5 4352.58 129.755   3
   0   2  -5 4346.53 136.754   3
   0   2  -5 4432.04 173.557   4
   0   2  -4 33486.6 507.699   3
   0   2  -4 34424.0 596.174   4
   0  -2   4 31393.2 499.686   3
   0   2  -3 20705.1 395.020   2
   0   2  -3 20736.6 320.706   3
   0   2  -3 21732.1 406.012   4
   0  -2   2 3236.78 116.097   4
   0   2  -2 3215.47 117.501   4
   0  -2   2 3215.75 115.517   2
   0   2  -2 3109.65 113.910   2
   0  -2   1 713.828 51.1579   4
   0   2  -1 726.399 51.2322   4
   0  -2   1 641.355 53.4837   1
   0  -2   1 710.119 52.4855   2
   0   2  -1 600.658 53.0578   1
   0  -2   0 214.192 28.0099   3
   0  -2   0 161.071 26.9103   4
   0  -2   0 229.843 37.3420   1
   0   2   0 222.788 34.0054   4
   0   2   0 144.821 33.7066   1
   0   2   0 159.543 26.4412   3
   0   2   1 485.087 41.8874   4
   0   2   1 432.628 44.2829   1
   0  -2  -1 472.715 39.5441   4
   0   2   1 512.529 53.4408   3
   0  -2  -1 513.847 51.5254   3
   0  -2  -1 540.843 51.1170   1
   0   2   2 4580.97 141.904   1
   0  -2  -2 4667.06 127.110   4
   0   2   2 4485.60 128.859   4
   0   2   2 4598.11 159.913   3
   0  -2  -2 4524.49 140.210   1
   0  -2  -2 4818.64 159.774   3
   0   2   3 16077.0 331.460   1
   0  -2  -3 16674.5 377.284   3
   0   2   3 17276.1 385.250   3
   0  -2  -3 16705.0 315.701   4
   0  -2  -3 16932.7 335.131   1
   0   2   4 797.916 86.9355   3
   0  -2  -4 675.166 62.9632   1
   0   2   4 663.586 62.9648   1
   0  -2  -4 774.385 89.5798   3
   0  -2  -4 938.329 66.0103   4
   0   2   5 39053.8 759.128   3
   0  -2  -5 37329.2 731.307   3
   0  -2  -5 37408.1 653.706   1
   0   2   5 38730.8 662.842   1
   0  -2  -6 950.153 80.1837   1
   0   2   6 927.572 80.8230   1
   0  -2  -6 752.980 96.3533   3
   0   2   6 861.773 101.991   3
   0  -2  -7 30740.5 680.533   3
   0  -2  -7 29747.0 588.059   1
   0  -2  -8 2184.76 132.772   1
   0  -2  -8 2218.79 172.246   3
   0  -2  -9 1125.64 128.274   3
   0  -2  -9 1028.48 97.9113   1
   0  -2 -10 3997.27 239.703   3
   0  -2 -10 3818.71 193.671   1
   0  -2 -11 2.40273 72.9901   3
   0  -2 -11 43.2177 38.6594   1
   0  -2 -12 331.875 71.3585   1
   0  -2 -12 298.251 93.9559   3
   0  -2 -13 20616.5 555.117   1
   0  -2 -13 19562.9 638.462   3
   0  -2 -14 20931.6 576.509   1
   0  -2 -14 19205.8 667.241   3
   0  -2 -15 4466.75 256.276   1
   0  -2 -15 4334.46 308.303   3
   0  -2 -16 178.900 73.8290   1
   0  -2 -16 137.693 78.2969   3
   0  -2 -17 2155.07 192.043   1
   0  -2 -17 2137.27 227.555   3
   0  -2 -18-55.8849 102.958   3
   0  -2 -19 396.778 121.076   3
   0   3 -20 10116.9 521.657   4
   0   3 -19 3294.10 283.432   4
   0   3 -18 65.9614 70.2376   4
   0   3 -17 340.412 98.1377   3
   0   3 -17 368.980 109.740   4
   0   3 -16 6.03779 62.2573   4
   0   3 -16 20.0092 61.0874   3
   0   3 -15 2.21182 56.9488   4
   0   3 -15 124.419 67.9767   3
   0   3 -14 3860.74 233.505   3
   0   3 -14 3685.22 253.585   4
   0   3 -13 6612.85 331.474   4
   0   3 -13 6320.84 292.082   3
   0   3 -12 58.0706 51.0349   4
   0   3 -12 51.7530 49.4934   3
   0   3 -11 7621.80 290.776   3
   0   3 -11 7788.95 336.646   4
   0   3 -10 295.217 76.4372   4
   0   3 -10 212.186 62.6929   3
   0  -3  10 220.481 44.5083   3
   0  -3   9 8231.42 247.257   3
   0   3  -9 8694.39 326.649   4
   0   3  -9 8834.72 277.453   3
   0   3  -8 3937.57 204.986   4
   0   3  -8 3741.51 171.403   3
   0  -3   8 3856.91 148.724   3
   0  -3   7 276.688 39.6549   3
   0   3  -7 275.023 63.5553   4
   0   3  -7 252.859 44.7656   3
   0  -3   6 5085.18 141.770   3
   0   3  -6 5301.10 157.435   3
   0   3  -6 5360.39 217.735   4
   0   3  -5 449.257 39.5955   3
   0   3  -5 490.035 63.8816   2
   0   3  -5 463.666 67.7684   4
   0   3  -4 15366.5 262.446   3
   0   3  -4 16521.4 374.011   4
   0   3  -4 16005.9 367.756   2
   0  -3   3 1611.90 99.0828   2
   0  -3   3 1807.63 105.706   4
   0   3  -3 1676.32 100.767   2
   0   3  -3 1542.41 52.1635   3
   0   3  -3 1674.23 105.633   4
   0   3  -3 1702.40 107.780   1
   0  -3   2 16586.6 355.805   2
   0   3  -2 17450.1 359.207   4
   0   3  -2 16553.9 377.008   1
   0   3  -2 17464.6 360.112   2
   0  -3   2 17690.9 362.990   4
   0   3  -1 21.4920 34.0905   4
   0   3  -1 10.0465 33.7696   1
   0  -3   1 26.3893 29.7494   4
   0   3  -1-14.2952 22.5555   3
   0  -3   1 42.7285 39.0680   1
   0  -3   1 49.6937 34.9863   2
   0   3   0 114568. 1668.49   1
   0   3   0 119584. 1637.08   4
   0  -3   0 114762. 1611.18   3
   0  -3   0 115210. 1634.34   4
   0  -3   0 116424. 1670.49   1
   0   3   0 114878. 1624.30   3
   0   3   1 83592.3 1235.62   1
   0  -3  -1 82389.4 1231.09   1
   0   3   1 82636.4 1194.58   4
   0  -3  -1 83451.3 1216.37   3
   0  -3  -1 79051.7 1192.02   4
   0   3   1 83345.7 1226.86   3
   0   3   2 1570.90 85.0939   4
   0   3   2 1435.92 90.9100   1
   0  -3  -2 1576.57 82.8821   4
   0  -3  -2 1670.52 103.171   3
   0  -3  -2 1638.08 96.8057   1
   0   3   2 1622.28 104.162   3
   0   3   3 6090.02 223.385   3
   0  -3  -3 5926.07 213.437   3
   0  -3  -3 5768.66 169.945   4
   0   3   3 6249.17 177.029   4
   0   3   3 5995.43 196.801   1
   0  -3  -3 5875.44 193.330   1
   0  -3  -4 65.7600 59.0013   3
   0  -3  -4 81.1360 42.3991   1
   0   3   4 52.9358 46.0465   3
   0  -3  -4 39.1334 29.0306   4
   0   3   4 106.686 37.9310   1
   0  -3  -5 4603.08 222.616   3
   0   3   5 4966.04 235.471   3
   0  -3  -5 4612.39 181.240   1
   0   3   5 4673.07 182.710   1
   0  -3  -5 4675.68 166.317   4
   0  -3  -6 9177.14 276.095   1
   0   3   6 9724.64 285.051   1
   0  -3  -6 9305.94 331.870   3
   0  -3  -6 9428.51 261.221   4
   0   3   7 56240.3 956.215   1
   0  -3  -7 53869.7 923.597   4
   0  -3  -7 54315.5 1052.40   3
   0  -3  -7 54785.1 948.319   1
   0  -3  -8 36689.1 832.409   3
   0  -3  -8 37643.1 707.128   4
   0  -3  -8 36739.1 723.140   1
   0  -3  -9 125.958 48.9497   1
   0  -3  -9-0.59628 68.0742   3
   0  -3  -9 149.598 41.7700   4
   0  -3 -10 1191.13 113.497   1
   0  -3 -10 1244.37 144.131   3
   0  -3 -11 144.422 76.3799   3
   0  -3 -11 311.553 70.2993   1
   0  -3 -12 849.865 140.612   3
   0  -3 -12 972.207 111.956   1
   0  -3 -13 4970.31 316.568   3
   0  -3 -13 4870.83 252.122   1
   0  -3 -14 8345.21 346.554   1
   0  -3 -14 8083.78 417.588   3
   0  -3 -15 1649.17 210.497   3
   0  -3 -15 1681.75 161.155   1
   0  -3 -16 1149.22 170.779   3
   0  -3 -16 1087.54 140.339   1
   0  -3 -17 1039.08 176.703   3
   0  -3 -18 406.059 123.085   3
   0  -3 -19 521.961 139.185   3
   0   4 -19 161.555 91.9889   4
   0   4 -18 2730.21 260.839   4
   0   4 -17 906.670 150.594   4
   0   4 -16 1519.67 186.236   4
   0   4 -15 1031.96 155.922   4
   0   4 -15 920.858 124.002   3
   0   4 -14 677.985 119.356   4
   0   4 -14 613.933 99.6571   3
   0   4 -13 2044.24 186.716   4
   0   4 -13 1884.06 150.912   3
   0   4 -12 514.973 79.9962   3
   0   4 -12 488.782 98.4398   4
   0   4 -11 121.319 61.3813   4
   0   4 -11 296.311 64.3761   3
   0  -4  11 260.963 47.1042   3
   0  -4  10 414.615 51.1957   3
   0   4 -10 559.256 93.0444   4
   0   4 -10 564.955 75.1050   3
   0  -4   9 1620.98 93.3152   3
   0   4  -9 2031.77 119.520   3
   0   4  -9 1883.75 155.136   4
   0   4  -8 6.57602 51.7538   4
   0   4  -8 58.9159 30.0480   3
   0  -4   8 79.6751 24.7360   3
   0   4  -7 60988.0 1077.60   4
   0   4  -7 58231.7 903.361   3
   0   4  -6 22143.5 525.214   4
   0   4  -6 21606.4 377.082   3
   0   4  -5 3950.34 105.825   3
   0   4  -5 4134.45 189.911   4
   0  -4   4 2736.33 146.283   4
   0   4  -4 2778.82 145.263   2
   0   4  -4 2697.81 144.876   4
   0   4  -4 2364.41 72.8721   3
   0   4  -4 2486.16 149.457   1
   0   4  -3 628.620 69.0819   2
   0  -4   3 550.228 71.1301   2
   0   4  -3 484.031 69.4567   1
   0  -4   3 664.360 72.4292   4
   0   4  -3 614.595 74.1355   4
   0  -4   2 38.4033 38.2571   2
   0   4  -2 36.5524 20.6121   3
   0   4  -2 123.060 45.7105   1
   0   4  -2 54.1207 38.7854   4
   0  -4   2 111.642 37.9023   4
   0   4  -1 14098.1 293.812   3
   0  -4   1 14092.5 335.391   4
   0   4  -1 14237.9 333.771   4
   0   4  -1 14807.6 357.707   1
   0  -4   1 14573.1 359.098   1
   0  -4   0 91116.5 1382.56   4
   0   4   0 93432.0 1381.32   4
   0  -4   0 92765.4 1430.58   1
   0   4   0 94360.5 1373.27   3
   0   4   0 93964.4 1424.89   1
   0   4   1 61284.6 979.470   4
   0   4   1 64696.0 1036.03   1
   0   4   1 64108.1 1015.50   3
   0  -4  -1 63584.8 986.082   4
   0  -4  -1 62289.9 1026.44   1
   0  -4  -1 63013.4 998.918   3
   0  -4  -2 2865.61 143.703   1
   0  -4  -2 2748.27 141.865   3
   0   4   2 2786.38 124.845   4
   0   4   2 2994.11 146.401   1
   0   4   2 3047.90 154.545   3
   0  -4  -2 3060.55 131.070   4
   0   4   3 1416.61 93.5226   4
   0   4   3 1472.89 118.406   3
   0  -4  -3 1371.86 89.1943   4
   0   4   3 1571.64 108.811   1
   0  -4  -3 1410.51 113.171   3
   0  -4  -3 1373.78 103.359   1
   0  -4  -4 313.166 72.1365   3
   0  -4  -4 440.668 53.1437   4
   0   4   4 393.228 62.3640   1
   0   4   4 455.698 57.2557   4
   0   4   4 395.140 74.1320   3
   0  -4  -4 424.469 63.3529   1
   0  -4  -5 414.485 85.1213   3
   0  -4  -5 326.943 60.4691   1
   0   4   5 255.374 51.8789   1
   0  -4  -5 363.632 55.6564   4
   0  -4  -6 80.2254 53.3854   3
   0   4   6 88.2076 35.5721   1
   0  -4  -6 180.888 50.9081   1
   0  -4  -6 119.644 30.7740   4
   0   4   7 15750.1 420.486   1
   0  -4  -7 15289.2 383.055   4
   0  -4  -7 15670.8 484.189   3
   0  -4  -7 16004.5 417.736   1
   0  -4  -8 2874.62 202.701   3
   0  -4  -8 2324.29 152.353   1
   0  -4  -8 2404.88 142.955   4
   0  -4  -9 699.217 90.4899   1
   0  -4  -9 725.138 122.500   3
   0  -4 -10 1504.46 130.948   1
   0  -4 -10 1267.12 156.230   3
   0  -4 -11 369.748 76.2005   1
   0  -4 -11 426.292 112.712   3
   0  -4 -12 6804.69 299.328   1
   0  -4 -12 6936.74 377.265   3
   0  -4 -13 3400.78 271.521   3
   0  -4 -13 3568.47 221.264   1
   0  -4 -14 54.7623 50.4112   1
   0  -4 -14 130.172 76.4879   3
   0  -4 -15 142.203 76.5457   1
   0  -4 -15 172.007 99.9128   3
   0  -4 -16 190.285 106.450   3
   0  -4 -17-16.2848 86.8084   3
   0  -4 -18 1661.74 233.475   3
   0   5 -18 141.080 88.6375   4
   0   5 -17 6.98173 66.6218   4
   0   5 -16 552.260 122.678   4
   0   5 -15-35.0498 72.7151   4
   0   5 -14 6433.52 358.240   4
   0   5 -13 23140.6 696.856   4
   0   5 -13 23559.8 549.588   3
   0   5 -12 12094.2 347.979   3
   0   5 -12 11549.2 455.166   4
   0   5 -11 254.597 55.8700   3
   0   5 -11 153.813 64.8759   4
   0   5 -10-24.5812 57.4852   4
   0   5 -10 110.480 45.7641   3
   0   5  -9 52.6179 46.2207   4
   0   5  -9 55.7532 30.6776   3
   0   5  -8 2134.78 167.928   4
   0   5  -8 2506.28 106.415   3
   0   5  -7 15979.9 306.711   3
   0   5  -7 16752.8 477.611   4
   0   5  -6 39584.0 807.436   4
   0   5  -6 39516.8 594.320   3
   0   5  -5 12544.0 226.300   3
   0   5  -5 12323.1 380.221   4
   0   5  -4 5364.56 140.097   3
   0   5  -4 5888.94 234.367   4
   0  -5   4 6113.23 240.942   2
   0   5  -3 1187.53 100.545   4
   0   5  -3 920.412 61.7875   3
   0  -5   3 1190.75 102.550   2
   0   5  -2 4702.75 154.296   3
   0   5  -2 5318.23 205.974   4
   0  -5   2 5362.35 211.953   4
   0  -5   2 5445.02 215.922   2
   0  -5   1 3005.52 153.821   4
   0   5  -1 3079.46 151.516   4
   0   5  -1 2946.51 129.596   3
   0  -5   1 3240.75 171.739   1
   0   5   0 1552.19 116.423   1
   0  -5   0 1428.18 101.111   4
   0   5   0 1562.72 104.941   4
   0   5   0 1690.07 105.837   3
   0  -5   0 1504.60 120.478   1
   0  -5  -1 3179.47 147.886   4
   0   5   1 3383.85 163.852   3
   0  -5  -1 3247.52 151.519   3
   0  -5  -1 3045.60 168.217   1
   0   5   1 3457.86 152.538   4
   0   5   1 3385.81 171.232   1
   0  -5  -2 255.044 63.7381   1
   0  -5  -2 156.176 48.6494   3
   0  -5  -2 234.093 42.9758   4
   0   5   2 269.846 49.1460   4
   0   5   2 227.546 56.3362   1
   0   5   2 275.192 59.4619   3
   0  -5  -3 10257.2 321.360   1
   0   5   3 10691.5 292.315   4
   0  -5  -3 10500.8 331.647   3
   0   5   3 10302.1 322.613   1
   0  -5  -3 10228.2 288.306   4
   0   5   3 10695.2 347.204   3
   0  -5  -4 606.922 68.9208   4
   0  -5  -4 591.998 91.4700   3
   0   5   4 636.839 75.3992   4
   0  -5  -4 685.174 84.5551   1
   0  -5  -5 29280.3 586.513   4
   0  -5  -5 30349.8 643.830   1
   0  -5  -5 29653.3 693.472   3
   0   5   5 30290.1 601.155   4
   0  -5  -6 13537.9 354.737   4
   0  -5  -6 14016.7 400.722   1
   0  -5  -6 13080.2 441.997   3
   0  -5  -7 950.477 129.584   3
   0  -5  -7 653.918 74.4803   4
   0  -5  -7 751.121 94.4513   1
   0  -5  -8 4488.49 201.028   4
   0  -5  -8 4556.92 273.764   3
   0  -5  -8 4866.51 232.406   1
   0  -5  -9 553.554 84.3798   1
   0  -5  -9 380.916 99.1847   3
   0  -5 -10-13.3860 57.9902   1
   0  -5 -10 26.1862 70.0450   3
   0  -5 -11 2679.56 187.238   1
   0  -5 -11 2816.58 237.707   3
   0  -5 -12 4031.69 238.344   1
   0  -5 -12 4053.70 293.009   3
   0  -5 -13 601.835 100.254   1
   0  -5 -13 377.344 118.026   3
   0  -5 -14 16457.4 534.377   1
   0  -5 -14 16400.9 654.000   3
   0  -5 -15 14133.3 502.638   1
   0  -5 -15 14108.8 618.558   3
   0  -5 -16 4160.35 336.375   3
   0  -5 -17 378.169 135.686   3
   0   6 -18 677.340 145.910   4
   0   6 -17 36.5698 82.5702   4
   0   6 -16-63.5460 89.7927   4
   0   6 -15 922.937 159.632   4
   0   6 -14 303.881 102.808   4
   0   6 -13 7528.76 388.731   4
   0   6 -12 1802.73 189.237   4
   0   6 -11 1729.19 179.160   4
   0   6 -11 1569.67 105.890   3
   0   6 -10 34.3927 61.3531   4
   0   6 -10 121.466 38.7080   3
   0   6  -9 1985.68 96.3821   3
   0   6  -9 2065.20 176.025   4
   0   6  -8 10260.0 393.899   4
   0   6  -8 10385.2 222.680   3
   0   6  -7 1934.60 159.364   4
   0   6  -7 2052.54 75.0753   3
   0   6  -6 1100.29 117.787   4
   0   6  -6 1324.59 55.3748   3
   0  -6   5 291.200 68.3385   2
   0   6  -5 310.414 29.8658   3
   0   6  -5 269.521 33.6105   3
   0   6  -5 213.565 59.6421   4
   0   6  -4 6592.75 266.609   4
   0  -6   4 6332.58 263.968   2
   0   6  -4 6428.64 171.574   3
   0  -6   3 528.713 82.0341   2
   0   6  -3 479.678 75.7579   4
   0   6  -3 458.753 48.5340   3
   0   6  -2 15291.3 345.752   3
   0   6  -2 15478.0 411.560   4
   0  -6   2 15860.2 431.326   2
   0  -6   1 12377.6 389.792   1
   0   6  -1 12230.9 351.321   4
   0   6  -1 12402.9 319.316   3
   0   6   0 1165.03 98.7355   4
   0  -6   0 1207.69 118.268   1
   0   6   0 1238.83 103.078   3
   0   6   1 19651.5 459.981   4
   0  -6  -1 19384.0 508.772   1
   0   6   1 20064.6 482.357   3
   0  -6  -1 19526.5 464.328   4
   0  -6  -2 6783.61 247.343   4
   0   6   2 7428.11 252.316   4
   0  -6  -2 7326.28 287.472   1
   0  -6  -2 7105.92 264.816   3
   0  -6  -3 926.663 89.5514   4
   0  -6  -3 599.131 88.0063   1
   0  -6  -3 590.195 85.5276   3
   0   6   3 601.277 74.5540   4
   0  -6  -4 3597.81 173.340   4
   0   6   4 3528.32 173.445   4
   0  -6  -4 3747.62 212.016   3
   0  -6  -4 3587.21 199.450   1
   0  -6  -5 1279.23 133.298   3
   0   6   5 1140.82 107.678   4
   0  -6  -5 1284.22 121.714   1
   0  -6  -5 1073.01 97.3572   4
   0  -6  -6 4265.94 251.586   3
   0  -6  -6 4711.29 233.884   1
   0  -6  -6 4452.88 198.738   4
   0  -6  -7 37196.5 894.892   3
   0  -6  -7 38569.8 818.747   1
   0  -6  -8 63114.4 1176.22   1
   0  -6  -8 61574.0 1285.35   3
   0  -6  -9 31364.1 731.325   1
   0  -6  -9 28727.3 817.344   3
   0  -6 -10 2914.38 200.674   1
   0  -6 -10 2825.45 245.831   3
   0  -6 -11 524.221 93.3419   1
   0  -6 -11 478.782 121.981   3
   0  -6 -12 633.022 103.116   1
   0  -6 -12 725.292 143.538   3
   0  -6 -13 21108.0 751.543   3
   0  -6 -13 21889.5 633.575   1
   0  -6 -14 44129.6 1187.49   3
   0  -6 -14 45984.6 1026.21   1
   0  -6 -15 33869.2 1034.25   3
   0  -6 -16 12066.3 598.001   3
   0   7 -17 1365.02 201.114   4
   0   7 -16 390.986 123.266   4
   0   7 -15 3234.91 279.492   4
   0   7 -14 187.914 97.9014   4
   0   7 -13 116.323 70.6163   4
   0   7 -12 47.3285 66.4950   4
   0   7 -11 914.152 142.965   4
   0   7 -10 1701.19 173.156   4
   0   7  -9 1740.23 177.822   4
   0   7  -8 4393.72 262.938   4
   0   7  -7 7138.93 321.801   4
   0   7  -6 20237.9 570.988   4
   0   7  -6 20948.6 336.089   3
   0   7  -6 20662.1 348.575   3
   0   7  -5 12979.0 423.674   4
   0   7  -5 13445.7 274.884   3
   0  -7   5 14303.2 446.339   2
   0   7  -4 3580.61 206.086   4
   0   7  -4 3570.89 134.530   3
   0  -7   4 3735.42 213.761   2
   0  -7   3 1784.38 147.346   2
   0   7  -3 2012.39 152.709   4
   0   7  -3 1963.30 108.777   3
   0  -7   2 67.9258 51.3571   2
   0   7  -2 69.9397 39.2182   3
   0   7  -2 26.1499 45.1167   4
   0   7  -1 8079.81 300.582   4
   0   7  -1 8392.02 274.753   3
   0  -7   1 8652.60 326.016   2
   0  -7   1 8508.24 336.950   1
   0   7   0 88739.1 1451.45   3
   0  -7   0 87717.9 1540.41   1
   0   7   0 91590.4 1471.56   4
   0  -7  -1 173832. 2639.05   1
   0   7   1 170108. 2539.22   4
   0   7   2 78046.9 1309.54   4
   0  -7  -2 78982.2 1400.78   1
   0  -7  -3 18637.9 530.935   1
   0  -7  -3 18587.0 512.820   3
   0   7   3 19807.6 486.476   4
   0  -7  -4-0.51947 47.4185   1
   0   7   4 101.719 46.7325   4
   0  -7  -4 10.5164 48.3965   3
   0   7   5 5627.93 240.799   4
   0  -7  -5 5147.87 277.411   3
   0  -7  -5 5286.32 265.173   1
   0   7   6 25387.8 597.428   4
   0  -7  -6 25061.0 645.017   1
   0  -7  -6 24344.8 678.745   3
   0  -7  -7 102814. 1729.75   1
   0  -7  -7 98591.8 1805.88   3
   0  -7  -8 88684.5 1697.56   3
   0  -7  -8 92933.4 1611.40   1
   0  -7  -9 38012.4 986.344   3
   0  -7  -9 41324.7 908.293   1
   0  -7 -10 8075.99 355.532   1
   0  -7 -10 7446.46 408.886   3
   0  -7 -11 210.120 94.4891   3
   0  -7 -11 346.920 85.3473   1
   0  -7 -12 59.3600 75.4033   3
   0  -7 -12 276.186 79.6306   1
   0  -7 -13 1595.53 216.835   3
   0  -7 -13 1856.57 179.350   1
   0  -7 -14 12668.3 600.557   3
   0  -7 -15 14473.9 654.463   3
   0   8 -15 131.874 90.9355   4
   0   8 -14 2670.06 261.124   4
   0   8 -13 14225.3 582.297   4
   0   8 -12 23512.3 751.569   4
   0   8 -11 7749.75 400.765   4
   0   8 -10-44.1692 67.6760   4
   0   8  -9 277.440 86.8035   4
   0   8  -8 9457.47 400.300   4
   0   8  -7 49311.4 1064.99   4
   0   8  -6 109919. 1876.85   4
   0   8  -6 110308. 1499.81   3
   0  -8   5 101215. 1759.16   2
   0   8  -5 101527. 1459.88   3
   0   8  -5 100455. 1741.57   4
   0  -8   4 27885.3 700.791   2
   0   8  -4 28094.5 694.485   4
   0   8  -4 27566.7 527.329   3
   0   8  -3 804.267 105.433   4
   0  -8   3 827.181 117.905   2
   0   8  -3 879.398 81.7243   3
   0   8  -2 108.775 44.0231   3
   0   8  -2 99.7049 54.1858   4
   0  -8   2 70.1496 52.3377   2
   0  -8   1 9838.77 377.892   2
   0   8  -1 10077.1 327.566   3
   0  -8   1 10117.5 398.418   1
   0   8  -1 9887.49 354.655   4
   0   8   0 90128.3 1508.14   4
   0  -8   0 87400.7 1589.99   1
   0  -8  -1 107723. 1862.12   1
   0   8   1 110080. 1769.76   4
   0   8   2 75914.2 1311.01   4
   0  -8  -2 73690.9 1398.86   1
   0   8   3 13840.4 420.865   4
   0  -8  -3 13508.6 467.879   1
   0   8   4 105.819 48.7494   4
   0  -8  -4 76.6773 57.3127   1
   0   8   5 1308.05 125.734   4
   0  -8  -5 1525.57 154.866   1
   0  -8  -5 1362.52 154.378   3
   0  -8  -6 850.697 117.216   1
   0   8   6 1005.39 118.352   4
   0  -8  -6 742.039 121.370   3
   0  -8  -7 9566.78 395.755   1
   0  -8  -7 9540.29 424.932   3
   0  -8  -8 19836.5 672.454   3
   0  -8  -8 20413.7 610.492   1
   0  -8  -9 4527.21 313.926   3
   0  -8  -9 4585.09 275.542   1
   0  -8 -10 536.432 127.505   3
   0  -8 -10 578.949 106.773   1
   0  -8 -11 1063.80 177.225   3
   0  -8 -11 1271.83 154.904   1
   0  -8 -12 3878.21 319.669   3
   0  -8 -12 4416.23 278.983   1
   0  -8 -13 5030.44 303.807   1
   0  -8 -13 4541.12 370.109   3
   0  -8 -14 50.7859 78.5172   3
   0   9 -14 9944.48 508.047   4
   0   9 -13 45053.0 1168.57   4
   0   9 -12 49866.2 1219.71   4
   0   9 -11 12649.8 534.567   4
   0   9 -10 2381.77 222.728   4
   0   9  -9 124.237 78.2285   4
   0   9  -8 2094.23 195.979   4
   0   9  -7 19782.8 624.343   4
   0   9  -6 47520.4 1055.23   4
   0  -9   5 43338.3 995.779   2
   0   9  -5 44155.3 982.485   4
   0  -9   4 7476.67 350.875   2
   0   9  -4 7923.91 349.164   4
   0   9  -3 40.9494 52.7358   4
   0  -9   3-12.4763 58.4388   2
   0   9  -2 3737.30 226.211   4
   0  -9   2 3760.52 244.043   2
   0  -9   1 1077.13 134.911   2
   0   9  -1 1102.66 125.258   4
   0  -9   0 379.312 95.0979   1
   0   9   0 332.163 77.8446   4
   0  -9  -1 7610.64 366.301   1
   0   9   1 7672.72 321.086   4
   0   9   2 5574.72 270.056   4
   0  -9  -2 5403.35 305.755   1
   0   9   3 673.481 98.1262   4
   0  -9  -3 652.513 111.214   1
   0  -9  -4 1478.11 161.930   1
   0   9   4 1708.00 154.070   4
   0  -9  -5 8685.82 389.732   1
   0   9   5 8645.20 345.509   4
   0  -9  -6 7456.58 363.776   1
   0   9   6 7127.38 322.155   4
   0  -9  -7 1022.47 148.737   3
   0  -9  -7 1253.67 155.701   1
   0  -9  -8 1171.59 151.806   1
   0  -9  -8 1219.48 164.028   3
   0  -9  -9 1329.94 162.048   1
   0  -9  -9 1222.79 178.592   3
   0  -9 -10 276.643 107.334   3
   0  -9 -10 241.562 94.3474   1
   0  -9 -11-43.7401 79.0052   1
   0  -9 -11-13.4280 75.4530   3
   0  -9 -12 2099.03 207.915   1
   0  -9 -12 1815.72 236.750   3
   0  -9 -13 12.2325 79.0607   3
   0  10 -13 12322.9 575.805   4
   0  10 -12 10617.3 513.955   4
   0  10 -11 2190.16 230.021   4
   0  10 -10-37.8860 80.4335   4
   0  10  -9 276.219 99.4988   4
   0  10  -8 4656.90 313.266   4
   0  10  -7 1477.64 173.819   4
   0  10  -6 2182.94 204.295   4
   0  10  -5 1108.50 143.220   4
   0 -10   5 1008.27 143.339   2
   0 -10   4 471.012 105.376   2
   0  10  -4 446.023 98.2790   4
   0  10  -3 892.924 127.532   4
   0 -10   3 670.417 116.819   2
   0 -10   2 2356.43 208.098   2
   0  10  -2 2345.84 193.031   4
   0  10  -1 6775.16 328.735   4
   0 -10   1 6887.87 356.565   2
   0  10   0 2237.36 187.166   4
   0 -10   0 2527.68 216.655   2
   0  10   1 4526.45 258.912   4
   0 -10  -1 4429.19 291.876   1
   0  10   2 4339.62 253.474   4
   0 -10  -2 4567.80 297.636   1
   0  10   3 367.570 84.1008   4
   0 -10  -3 230.385 85.1022   1
   0 -10  -4 391.632 102.359   1
   0  10   4 420.546 93.6226   4
   0 -10  -5-49.1498 75.1249   1
   0  10   5 40.2241 50.4107   4
   0 -10  -6 261.218 96.3046   1
   0  10   6 258.796 72.1052   4
   0 -10  -7 2865.23 245.475   1
   0 -10  -8 8710.12 428.181   1
   0 -10  -9 4922.85 317.691   1
   0 -10 -10 76.9153 81.2417   1
   0 -10 -11 1532.60 185.091   1
   0  11 -11 182.881 81.4012   4
   0  11 -10 76.9535 65.1634   4
   0  11  -9 45.0505 70.3264   4
   0  11  -8 1921.49 212.222   4
   0  11  -7 609.805 124.251   4
   0  11  -6 2739.05 237.406   4
   0  11  -5 3107.12 250.878   4
   0 -11   5 3602.68 277.373   2
   0  11  -4 843.354 135.690   4
   0 -11   4 701.508 130.617   2
   0 -11   3 1365.02 174.384   2
   0  11  -3 1497.92 169.336   4
   0  11  -2 310.304 78.5975   4
   0 -11   2 368.099 106.091   2
   0  11  -1 380.114 93.4988   4
   0 -11   1 412.132 105.529   2
   0  11   0 5630.66 311.520   4
   0 -11   0 5746.30 347.210   2
   0  11   1 12691.2 480.519   4
   0 -11  -2 13603.0 556.864   1
   0  11   2 13016.8 483.827   4
   0  11   3 1445.86 162.082   4
   0 -11  -3 1280.54 173.503   1
   0  11   4 4011.63 259.486   4
   0 -11  -4 3565.97 281.394   1
   0 -11  -5 2277.29 231.584   1
   0  11   5 2246.79 192.144   4
   0 -11  -6 167.423 86.7406   1
   0 -11  -7 2398.60 238.216   1
   0 -11  -8 8292.42 440.472   1
   0 -11  -9 1170.95 177.390   1
   0 -11 -10 524.657 127.684   1
   0  12  -9 177.154 98.4835   4
   0  12  -8 142.780 87.9676   4
   0  12  -7 1796.85 208.878   4
   0  12  -6 7603.07 416.868   4
   0  12  -5 9251.94 459.110   4
   0 -12   5 9538.36 482.225   2
   0  12  -4 1823.53 199.461   4
   0 -12   4 2032.24 221.375   2
   0 -12   3 1465.72 189.058   2
   0  12  -3 1396.40 173.170   4
   0  12  -2 1126.66 152.388   4
   0 -12   2 1056.42 160.937   2
   0 -12   1 127.223 85.4062   2
   0  12  -1 116.999 77.4645   4
   0  12   0 1057.03 149.523   4
   0 -12   0 1386.22 186.143   2
   0 -12  -1 4494.17 329.844   2
   0  12   1 4574.21 294.897   4
   0  12   2 455.412 101.690   4
   0 -12  -3 395.452 113.560   1
   0  12   3 410.226 98.0719   4
   0 -12  -4 1077.30 169.833   1
   0 -12  -5 126.080 101.706   1
   0 -12  -6 4949.63 349.701   1
   0 -12  -7 2889.66 273.374   1
   0 -12  -8 15.3481 85.9447   1
   0 -12  -9-34.4853 88.4288   1
   0  13  -7 818.341 160.287   4
   0  13  -6-12.9943 70.3483   4
   0  13  -5 472.090 122.914   4
   0  13  -4 363.430 110.333   4
   0  13  -3 291.850 100.136   4
   0 -13   3 170.478 97.6584   2
   0  13  -2 297.072 89.3764   4
   0 -13   2 381.298 115.192   2
   0 -13   1 4284.05 335.846   2
   0  13  -1 4189.98 301.615   4
   0 -13   0 7802.98 455.849   2
   0  13   0 7877.04 418.502   4
   0 -13  -1 891.508 167.290   2
   0  13   1 1003.66 149.203   4
   0 -13  -5 2149.83 242.986   1
   0 -13  -6 2553.52 261.717   1
   0 -13  -7 1052.16 178.810   1
   0  14  -3-101.910 83.7838   4
   0  14  -2 25.2121 68.0168   4
   0  14  -1 1575.75 203.724   4
  -1  14  -1 4223.32 310.137   4
  -1  14  -2 463.487 122.452   4
  -1  14  -3 472.655 125.513   4
  -1  14  -4 336.451 101.932   4
  -1  14  -5 911.696 159.163   4
   1 -13  -7 6716.38 432.661   1
   1 -13  -6 6767.36 431.983   1
   1 -13  -5 780.078 164.243   1
   1 -13  -4 623.742 149.428   1
   1 -13  -3 2357.18 259.301   1
   1 -13  -2 1607.49 205.546   2
   1 -13  -2 1923.05 231.819   1
   1 -13  -1 1000.67 178.107   2
  -1  13   1 1345.66 168.672   4
  -1  13   0 4382.42 292.513   4
   1 -13   0 4575.22 339.887   2
   1 -13   1 403.238 109.311   2
  -1  13  -1 608.609 129.465   4
  -1  13  -2 5175.62 329.575   4
   1 -13   2 5869.79 381.280   2
   1 -13   3 12675.8 571.230   2
  -1  13  -3 12469.0 527.046   4
   1 -13   4 6091.01 395.626   2
  -1  13  -4 6491.20 381.227   4
   1 -13   5 1927.72 223.226   2
  -1  13  -5 1795.83 207.804   4
  -1  13  -6 22.8585 68.5095   4
  -1  13  -7 13.9471 72.9183   4
  -1  13  -8 2731.82 271.798   4
   1 -12 -10 3074.09 283.705   1
   1 -12  -9 380.852 117.407   1
   1 -12  -8 534.195 132.521   1
   1 -12  -7 947.908 169.840   1
   1 -12  -6 62.1842 76.7800   1
   1 -12  -5 5512.79 367.013   1
   1 -12  -4 24923.0 822.847   1
  -1  12   3 19182.4 601.827   4
   1 -12  -3 19330.9 708.257   1
   1 -12  -2 3260.17 283.877   1
  -1  12   2 3372.28 238.817   4
   1 -12  -1-137.016 101.378   1
   1 -12  -1-46.5322 82.9440   2
  -1  12   1 19.9373 50.1688   4
   1 -12   0 30.7190 72.0674   2
  -1  12   0 31.6691 62.2610   4
  -1  12  -1 7512.28 368.482   4
   1 -12   1 6781.25 391.785   2
   1 -12   2 19478.1 693.524   2
  -1  12  -2 19833.5 638.642   4
  -1  12  -3 32089.2 855.625   4
   1 -12   3 30771.9 900.987   2
   1 -12   4 16713.3 636.512   2
  -1  12  -4 16570.7 593.314   4
   1 -12   5 235.808 102.664   2
  -1  12  -5 381.547 108.608   4
  -1  12  -6 77.5292 67.9132   4
  -1  12  -7 261.044 104.214   4
  -1  12  -8 477.753 110.922   4
  -1  12  -9 3872.85 308.810   4
  -1  12 -10 6874.43 422.989   4
   1 -11 -12 4330.79 324.422   1
   1 -11 -11 21459.5 747.433   1
   1 -11 -10 15462.8 617.593   1
   1 -11  -9 4380.57 318.384   1
   1 -11  -8 44.6099 74.2097   1
   1 -11  -7 1859.19 207.015   1
   1 -11  -6 4292.12 308.671   1
  -1  11   5 11826.5 420.993   4
   1 -11  -5 11934.3 524.592   1
  -1  11   4 33626.1 798.032   4
   1 -11  -4 31696.1 916.511   1
  -1  11   3 17164.9 532.280   4
   1 -11  -3 16426.8 621.060   1
   1 -11  -2 2361.13 228.252   1
  -1  11   2 2852.68 205.746   4
   1 -11  -1 352.406 90.4318   1
  -1  11   1 350.926 80.0272   4
   1 -11   0 406.357 113.239   1
   1 -11   0 285.284 84.5999   2
  -1  11   0 433.275 88.8262   4
   1 -11   1 1020.46 149.555   2
  -1  11  -1 849.899 123.207   4
  -1  11  -2 162.154 71.3429   4
   1 -11   2 276.596 95.0312   2
   1 -11   3 5212.48 318.952   2
  -1  11  -3 5635.62 313.316   4
  -1  11  -4 3075.83 234.693   4
   1 -11   4 3039.61 246.419   2
   1 -11   5 178.515 80.9359   2
  -1  11  -5 133.294 75.7734   4
  -1  11  -6 2979.90 239.465   4
  -1  11  -7 13127.2 534.804   4
  -1  11  -8 11312.8 499.295   4
  -1  11  -9 4939.13 329.895   4
  -1  11 -10-13.6608 76.7823   4
  -1  11 -11-15.9806 74.1638   4
  -1  11 -12 438.923 117.128   4
   1 -10 -12 4120.94 305.611   1
   1 -10 -11 9041.87 449.131   1
   1 -10 -10 12391.3 527.107   1
   1 -10  -9 2086.07 210.761   1
   1 -10  -8 42.6982 61.6844   1
   1 -10  -7 1440.41 172.632   1
  -1  10   6 8973.31 343.517   4
   1 -10  -6 7929.65 400.241   1
   1 -10  -5 3839.38 274.526   1
  -1  10   5 4574.77 236.886   4
  -1  10   4 298.086 70.9944   4
   1 -10  -4 202.714 73.3775   1
  -1  10   3 48.4202 52.7199   4
   1 -10  -3 53.2808 67.1300   1
   1 -10  -2 361.482 95.9122   1
  -1  10   2 316.495 74.1387   4
   1 -10  -1 463.618 108.682   1
  -1  10   1 567.267 94.5204   4
  -1  10   0 11493.9 407.247   4
   1 -10   0 11139.1 450.213   2
   1 -10   0 11196.1 472.503   1
   1 -10   1 34832.3 907.723   1
  -1  10  -1 34789.9 807.411   4
   1 -10   1 34826.7 871.747   2
  -1  10  -2 12558.4 441.937   4
   1 -10   2 12354.0 478.249   2
   1 -10   3 1769.89 178.828   2
  -1  10  -3 1938.60 174.350   4
   1 -10   4 2089.91 192.981   2
  -1  10  -4 1819.07 170.192   4
   1 -10   5 2769.40 224.318   2
  -1  10  -5 2525.36 207.478   4
  -1  10  -6 91.9468 62.4859   4
  -1  10  -7 4283.07 280.258   4
  -1  10  -8 7208.79 371.726   4
  -1  10  -9 538.932 117.651   4
  -1  10 -10 663.926 135.920   4
  -1  10 -11 1047.78 164.299   4
  -1  10 -12 5288.21 356.889   4
  -1  10 -13 4242.44 327.730   4
   1  -9 -13 5613.12 344.146   1
   1  -9 -12 5943.72 349.213   1
   1  -9 -11 2034.36 202.239   1
   1  -9 -10 216.034 80.2186   1
   1  -9  -9 589.070 110.091   1
   1  -9  -8 1216.78 153.953   1
   1  -9  -7 3921.95 265.501   1
  -1   9   6 22076.2 560.917   4
   1  -9  -6 21821.6 660.519   1
  -1   9   5 19536.7 510.619   4
   1  -9  -5 19700.6 614.657   1
  -1   9   4 5348.55 245.224   4
   1  -9  -4 4847.12 287.676   1
  -1   9   3 203.394 58.3725   4
   1  -9  -3 360.293 94.1636   1
  -1   9   2 2823.44 177.108   4
   1  -9  -2 2760.42 212.997   1
   1  -9  -1 6103.50 321.203   1
  -1   9   1 6367.77 272.100   4
   1  -9   0 131.061 73.9985   1
  -1   9   0 48.2072 47.4214   4
  -1   9  -1 1693.73 146.695   4
   1  -9   1 1625.01 155.880   2
   1  -9   1 1951.29 182.004   1
   1  -9   2 226.694 75.7631   1
   1  -9   2 76.1813 57.6513   2
  -1   9  -2 160.077 56.7062   4
  -1   9  -3 705.132 105.310   4
   1  -9   3 675.862 109.071   2
  -1   9  -3 885.101 90.7009   3
  -1   9  -4 69.5228 50.4660   4
   1  -9   4 45.1203 50.9457   2
  -1   9  -5 7561.79 335.856   4
   1  -9   5 7453.96 349.530   2
  -1   9  -6 27032.8 717.571   4
  -1   9  -6 27905.0 504.796   3
  -1   9  -7 8336.09 375.306   4
  -1   9  -8 1229.87 151.300   4
  -1   9  -9 4271.72 288.048   4
  -1   9 -10 2700.53 233.681   4
  -1   9 -11 341.685 114.491   4
  -1   9 -12 6077.38 370.459   4
  -1   9 -13 9180.93 475.773   4
  -1   9 -14 1698.78 212.357   4
  -1   9 -15 148.670 93.6512   4
   1  -8 -14 17.6729 65.0530   1
   1  -8 -14-35.6903 97.3439   3
   1  -8 -13 4302.03 290.123   1
   1  -8 -13 4096.48 335.064   3
   1  -8 -12 7833.25 449.705   3
   1  -8 -12 8100.85 394.482   1
   1  -8 -11 969.242 171.654   3
   1  -8 -11 1062.92 147.049   1
   1  -8 -10 270.192 88.8836   1
   1  -8 -10 85.5907 71.1837   3
   1  -8  -9 2917.58 221.280   1
   1  -8  -9 2566.99 232.918   3
   1  -8  -8 6821.95 359.781   3
   1  -8  -8 6977.19 338.524   1
   1  -8  -7 1668.31 167.372   1
  -1   8   6 654.155 85.1467   4
   1  -8  -6 511.213 97.5057   1
  -1   8   5 148.424 50.1430   4
   1  -8  -5 213.093 77.4780   1
   1  -8  -4 2640.19 199.617   1
  -1   8   4 3193.31 175.403   4
   1  -8  -3 2805.14 202.637   1
  -1   8   3 3259.64 174.202   4
   1  -8  -2 9125.84 372.135   1
  -1   8   2 9676.92 315.441   4
  -1   8   1 24850.9 565.915   4
   1  -8  -1 23302.5 642.907   1
   1  -8   0 20794.4 592.382   1
  -1   8   0 20487.4 509.608   4
  -1   8  -1 4811.66 226.451   4
   1  -8   1 4565.85 244.549   2
   1  -8   1 4870.92 267.676   1
  -1   8  -2 2576.05 148.728   3
   1  -8   2 2728.54 202.078   1
   1  -8   2 2382.63 176.197   2
  -1   8  -2 2710.87 171.025   4
  -1   8  -3 6644.55 283.670   4
   1  -8   3 6533.13 297.009   2
  -1   8  -3 6453.83 229.393   3
  -1   8  -4 351.169 52.0501   3
   1  -8   4 366.848 80.1477   2
  -1   8  -4 319.066 74.9202   4
  -1   8  -5 4767.54 253.835   4
  -1   8  -5 4678.06 172.284   3
   1  -8   5 4786.86 259.931   2
  -1   8  -6 12798.1 286.213   3
  -1   8  -6 12413.5 439.840   4
  -1   8  -6 12630.5 296.409   3
  -1   8  -7 321.098 40.3633   3
  -1   8  -7 171.451 54.0280   4
  -1   8  -8 2399.10 108.081   3
  -1   8  -8 2425.65 196.947   4
  -1   8  -9 875.518 135.279   4
  -1   8 -10-35.5271 67.5604   4
  -1   8 -11 357.136 98.8019   4
  -1   8 -12 1016.40 151.507   4
  -1   8 -13 86.5325 74.2352   4
  -1   8 -14 7538.73 429.384   4
  -1   8 -15 7202.16 428.321   4
  -1   8 -16 2150.67 236.840   4
   1  -7 -15 2698.45 287.475   3
   1  -7 -15 3393.61 259.264   1
   1  -7 -14 5548.26 322.619   1
   1  -7 -14 4801.45 365.028   3
   1  -7 -13 770.365 151.114   3
   1  -7 -13 804.572 128.801   1
   1  -7 -12 112.540 71.9236   1
   1  -7 -12 95.3602 73.2842   3
   1  -7 -11 1524.38 195.609   3
   1  -7 -11 1872.33 180.742   1
   1  -7 -10 4418.45 266.827   1
   1  -7 -10 3866.35 282.498   3
   1  -7  -9 593.326 121.291   3
   1  -7  -9 1162.94 133.161   1
   1  -7  -8 17267.6 595.008   3
   1  -7  -8 18893.9 560.304   1
   1  -7  -7 20134.1 468.428   4
   1  -7  -7 20238.4 578.023   1
   1  -7  -7 20004.9 612.771   3
   1  -7  -6 1009.87 132.165   3
   1  -7  -6 1094.38 92.4779   4
   1  -7  -6 1354.69 140.671   1
   1  -7  -5 322.072 52.4046   4
   1  -7  -5 415.569 86.7189   1
  -1   7   5 454.411 65.3199   4
  -1   7   4 1350.54 106.025   4
   1  -7  -4 1320.71 99.1354   4
   1  -7  -4 1364.44 134.133   1
   1  -7  -3 128.037 51.2662   1
  -1   7   3 229.844 49.0439   4
   1  -7  -3 276.515 51.1559   4
   1  -7  -2 2196.44 136.282   4
  -1   7   2 2441.87 139.235   4
   1  -7  -2 2126.59 163.277   1
  -1   7   1 10237.9 307.278   4
   1  -7  -1 10398.6 321.755   4
   1  -7  -1 10286.3 369.542   1
  -1   7   0 395.002 63.7747   4
   1  -7   0 475.718 89.6076   1
  -1   7   0 449.953 69.2928   3
  -1   7  -1 12678.4 369.322   4
   1  -7   1 13252.3 407.251   2
  -1   7  -1 13782.0 361.422   3
   1  -7   1 14079.4 438.702   1
  -1   7  -2 22785.8 490.667   3
  -1   7  -2 23599.4 545.043   4
   1  -7   2 22950.1 570.882   2
   1  -7   2 24373.8 608.465   1
   1  -7   3 1238.31 120.824   2
  -1   7  -3 1187.32 85.5376   3
  -1   7  -3 1255.46 112.014   4
   1  -7   4 8.41154 46.7286   2
  -1   7  -4 60.4316 30.4334   3
  -1   7  -4 1.61998 42.0336   4
  -1   7  -5 3717.83 214.702   4
   1  -7   5 4148.24 225.204   2
  -1   7  -6 265.021 70.3665   4
  -1   7  -6 279.804 38.3934   3
  -1   7  -7 18852.9 552.128   4
  -1   7  -7 19000.7 374.576   3
  -1   7  -8 37088.4 863.890   4
  -1   7  -8 36332.7 623.226   3
  -1   7  -9 23588.3 463.369   3
  -1   7  -9 24143.9 674.260   4
  -1   7 -10 0.69101 73.0562   4
  -1   7 -10 162.071 38.2915   3
  -1   7 -11 4520.56 288.610   4
  -1   7 -12 701.868 127.396   4
  -1   7 -13 1308.67 170.488   4
  -1   7 -14 4797.78 327.110   4
  -1   7 -15 4285.99 316.632   4
  -1   7 -16 49.3507 75.5257   4
  -1   7 -17 3806.59 318.434   4
   1  -6 -16 184.028 79.5774   1
   1  -6 -16 56.3192 78.0536   3
   1  -6 -15 6102.18 415.709   3
   1  -6 -15 6701.95 354.808   1
   1  -6 -14 4509.78 345.095   3
   1  -6 -14 4808.57 293.042   1
   1  -6 -13 17.8079 76.7032   3
   1  -6 -13 108.818 55.2227   1
   1  -6 -12 1336.83 184.782   3
   1  -6 -12 1906.21 175.745   1
   1  -6 -11 516.188 115.839   3
   1  -6 -11 341.175 79.1002   1
   1  -6 -10-64.8048 73.8148   1
   1  -6 -10 82.0820 70.8810   3
   1  -6  -9-4.74700 56.2194   1
   1  -6  -9 53.9662 29.8562   4
   1  -6  -9 87.6046 69.1077   3
   1  -6  -8 5880.32 217.202   4
   1  -6  -8 6052.57 284.099   1
   1  -6  -8 6053.71 319.818   3
   1  -6  -7 928.576 109.009   1
   1  -6  -7 676.308 70.7045   4
   1  -6  -7 524.483 102.185   3
   1  -6  -6 21923.3 466.834   4
   1  -6  -6 22928.9 613.185   3
   1  -6  -6 22870.8 582.604   1
   1  -6  -5 27127.9 657.417   3
   1  -6  -5 25796.3 521.846   4
  -1   6   5 27596.6 541.494   4
   1  -6  -5 26432.9 634.696   1
   1  -6  -4 16568.3 468.395   3
  -1   6   4 16735.8 386.055   4
   1  -6  -4 16746.3 381.882   4
   1  -6  -4 16843.3 471.200   1
  -1   6   3 560.324 64.5069   4
   1  -6  -3 568.466 62.3628   4
   1  -6  -3 588.168 87.6558   1
  -1   6   2 1057.48 84.1929   4
   1  -6  -2 973.594 111.254   1
   1  -6  -2 909.189 79.8343   4
  -1   6   1 773.386 74.3890   4
   1  -6  -1 691.054 73.1095   4
  -1   6   1 880.143 85.6365   3
   1  -6  -1 827.539 97.4711   1
   1  -6   0 20147.7 512.110   1
  -1   6   0 19932.3 443.951   4
   1  -6   0 20719.7 457.571   4
  -1   6   0 20222.1 455.912   3
   1  -6   1 52604.0 975.829   1
  -1   6  -1 51160.8 862.066   3
  -1   6  -1 51060.8 890.429   4
   1  -6   1 52473.4 912.486   4
   1  -6   1 51033.3 932.130   2
  -1   6  -2 33032.5 655.886   4
  -1   6  -2 34243.6 600.561   3
   1  -6   2 33121.4 712.911   1
   1  -6   2 31843.3 675.099   2
   1  -6   3 822.295 91.9910   2
  -1   6  -3 795.993 85.5264   4
  -1   6  -4 4962.00 222.876   4
   1  -6   4 4946.86 225.560   2
  -1   6  -5 9973.30 340.526   4
  -1   6  -5 9646.37 228.846   3
  -1   6  -6 1157.14 74.1666   3
  -1   6  -6 1107.78 120.276   4
  -1   6  -7 2694.49 116.317   3
  -1   6  -7 2563.32 177.923   4
  -1   6  -8 10465.4 385.857   4
  -1   6  -8 10256.4 262.038   3
  -1   6  -9 214.252 62.6758   4
  -1   6  -9 206.544 45.5934   3
  -1   6 -10 14125.0 489.769   4
  -1   6 -10 14533.4 370.657   3
  -1   6 -11 11811.1 462.940   4
  -1   6 -11 13230.3 367.613   3
  -1   6 -12 5016.41 229.055   3
  -1   6 -12 5153.98 303.063   4
  -1   6 -13 299.576 74.2449   3
  -1   6 -13 312.199 86.0483   4
  -1   6 -14 265.893 85.8729   4
  -1   6 -15 45.5093 67.0812   4
  -1   6 -16 2589.13 250.585   4
  -1   6 -17 10266.1 516.839   4
  -1   6 -18 6513.12 425.713   4
   1  -5 -17 12.2545 91.3888   3
   1  -5 -16-83.5530 93.7181   3
   1  -5 -16 85.8165 68.6372   1
   1  -5 -15 1003.93 138.199   1
   1  -5 -15 1115.00 182.191   3
   1  -5 -14 49.8069 67.6401   1
   1  -5 -14 37.9391 75.8678   3
   1  -5 -13 6495.70 378.273   3
   1  -5 -13 7213.19 338.877   1
   1  -5 -12 18759.6 562.396   1
   1  -5 -12 18265.9 639.527   3
   1  -5 -11 14557.7 470.998   1
   1  -5 -11 13275.7 530.862   3
   1  -5 -10 139.275 40.6606   4
   1  -5 -10 137.374 70.9906   3
   1  -5 -10 191.030 60.0109   1
   1  -5  -9 44.3403 56.3169   3
   1  -5  -9 120.056 35.2733   4
   1  -5  -9 70.7000 48.9839   1
   1  -5  -8 81.5882 57.5880   3
   1  -5  -8 79.6124 32.1721   4
   1  -5  -8 16.8520 48.5607   1
   1  -5  -7 10754.6 361.255   1
   1  -5  -7 10554.5 280.824   4
   1  -5  -7 10059.5 387.746   3
   1  -5  -6 20676.1 565.311   3
   1  -5  -6 21424.1 530.704   1
   1  -5  -6 21052.6 429.483   4
   1  -5  -5 39398.6 782.225   1
   1  -5  -5 38930.0 816.915   3
   1  -5  -5 38717.2 662.604   4
   1  -5  -4 1868.92 134.812   1
   1  -5  -4 2128.93 146.899   3
   1  -5  -4 1931.07 100.040   4
  -1   5   4 1990.92 103.378   4
  -1   5   3 35561.9 604.422   4
  -1   5   3 36320.9 714.368   3
   1  -5  -3 34241.1 700.093   1
   1  -5  -3 33733.1 595.806   4
   1  -5  -2 17526.7 369.645   4
  -1   5   2 18233.3 451.710   1
  -1   5   2 19583.0 445.075   3
  -1   5   2 18232.0 372.090   4
   1  -5  -2 17863.8 445.669   1
  -1   5   1 1702.06 111.417   3
  -1   5   1 1434.12 87.7331   4
   1  -5  -1 1528.84 121.471   1
   1  -5  -1 1597.92 93.1752   4
  -1   5   1 1583.01 116.129   1
   1  -5   0 61.4039 29.2710   4
   1  -5   0 46.4691 47.0581   1
  -1   5   0 102.719 47.6649   1
  -1   5   0 65.9326 34.3838   4
  -1   5   0 24.5289 26.6809   3
   1  -5   1 37.5964 31.3632   4
   1  -5   1-0.79734 43.4048   1
  -1   5  -1 42.6709 35.1325   1
  -1   5  -1-21.6227 33.5928   3
  -1   5  -1 10.1545 31.3630   4
   1  -5   1 18.8381 38.8550   2
   1  -5   2 2298.91 129.464   4
  -1   5  -2 2812.60 155.822   1
   1  -5   2 2106.70 129.220   2
  -1   5  -2 2119.15 119.181   4
   1  -5   2 2318.83 142.355   1
   1  -5   3 34125.4 664.629   2
  -1   5  -3 33724.5 652.984   4
  -1   5  -4 62932.6 1081.76   4
   1  -5   4 64700.0 1094.43   2
  -1   5  -5 21406.2 511.395   4
  -1   5  -5 20828.3 385.101   3
  -1   5  -6 97.8832 43.9994   4
  -1   5  -6 173.358 33.7550   3
  -1   5  -7 887.251 68.0090   3
  -1   5  -7 879.762 104.792   4
  -1   5  -8 72.5823 46.2478   4
  -1   5  -8 244.393 46.1201   3
  -1   5  -9 6321.00 295.324   4
  -1   5  -9 5743.14 210.059   3
  -1   5 -10 22468.5 621.341   4
  -1   5 -10 22230.5 506.129   3
  -1   5 -11 23547.8 557.303   3
  -1   5 -11 22961.3 655.224   4
  -1   5 -12 2391.42 201.645   4
  -1   5 -12 2159.19 159.046   3
  -1   5 -13 509.479 90.4320   3
  -1   5 -13 410.036 99.7100   4
  -1   5 -14 378.348 106.767   4
  -1   5 -14 297.597 79.9759   3
  -1   5 -15 3509.25 271.920   4
  -1   5 -16 663.241 135.854   4
  -1   5 -17 964.477 158.442   4
  -1   5 -18 999.534 173.466   4
   1  -4 -18 3445.63 311.565   3
   1  -4 -17 237.397 87.2506   1
   1  -4 -17 106.320 94.5606   3
   1  -4 -16 393.482 118.507   3
   1  -4 -16 944.424 139.351   1
   1  -4 -15 927.611 168.420   3
   1  -4 -15 1084.28 141.597   1
   1  -4 -14 77.5031 74.5757   3
   1  -4 -14-1.73813 55.5160   1
   1  -4 -13 675.516 103.975   1
   1  -4 -13 547.500 129.694   3
   1  -4 -12 6862.87 313.506   1
   1  -4 -12 6316.23 357.927   3
   1  -4 -11 1205.13 128.691   1
   1  -4 -11 983.161 148.398   3
   1  -4 -10 23427.6 589.976   1
   1  -4 -10 21844.0 504.297   4
   1  -4 -10 22626.1 652.983   3
   1  -4  -9 16907.5 533.868   3
   1  -4  -9 17788.0 484.656   1
   1  -4  -9 16926.3 407.011   4
   1  -4  -8 3368.30 217.029   3
   1  -4  -8 3577.31 154.487   4
   1  -4  -8 3801.57 201.080   1
   1  -4  -7 8290.77 234.299   4
   1  -4  -7 7975.43 326.632   3
   1  -4  -7 8070.43 291.458   1
   1  -4  -6 3836.74 211.070   3
   1  -4  -6 4093.48 194.963   1
   1  -4  -6 3865.15 144.919   4
   1  -4  -5 193.195 56.4485   3
  -1   4   5 220.068 53.0877   1
   1  -4  -5 225.774 35.1776   4
   1  -4  -5 246.932 62.0731   1
   1  -4  -4 42898.1 801.510   3
  -1   4   4 45027.2 819.109   3
   1  -4  -4 40468.7 661.132   4
   1  -4  -4 42028.2 778.960   1
  -1   4   4 42620.6 780.997   1
  -1   4   4 41451.4 672.950   4
   1  -4  -3 87166.8 1368.94   3
   1  -4  -3 84581.1 1244.92   4
  -1   4   3 90260.2 1382.88   3
  -1   4   3 86885.0 1370.39   1
   1  -4  -3 86200.6 1363.07   1
  -1   4   3 88747.7 1253.44   4
   1  -4  -2 52411.7 798.214   4
   1  -4  -2 51321.4 898.072   1
  -1   4   2 54704.4 897.671   3
  -1   4   2 52735.6 801.685   4
  -1   4   2 54118.7 908.709   1
  -1   4   1 1477.48 106.083   1
  -1   4   1 1312.23 91.6906   3
  -1   4   1 1544.53 80.4324   4
   1  -4  -1 1463.14 77.0683   4
   1  -4  -1 1588.80 108.195   1
  -1   4   0 8552.70 254.677   1
  -1   4   0 8141.46 206.043   4
  -1   4   0 8474.30 218.996   3
   1  -4   0 8207.40 252.152   1
   1  -4   0 8604.25 216.017   4
   1  -4   1 1098.60 94.2718   1
  -1   4  -1 1015.44 87.3292   1
   1  -4   1 1112.80 84.4095   2
  -1   4  -1 1036.16 74.6548   4
   1  -4   1 1128.44 76.8890   4
   1  -4   2 1171.28 95.1068   1
   1  -4   2 1134.20 86.7953   2
  -1   4  -2 2102.48 121.785   1
  -1   4  -2 1148.91 85.9324   4
   1  -4   2 1051.64 80.2208   4
  -1   4  -3 30748.6 586.918   4
   1  -4   3 30765.9 593.881   2
  -1   4  -3 31371.5 598.079   2
  -1   4  -3 32661.9 614.491   1
  -1   4  -4 49488.5 852.454   2
  -1   4  -4 46351.9 734.587   3
  -1   4  -4 50482.7 865.540   1
  -1   4  -4 51506.8 860.736   4
  -1   4  -5 7340.20 254.916   1
  -1   4  -5 6996.18 183.948   3
  -1   4  -5 7685.07 260.859   4
  -1   4  -6 1224.28 109.771   4
  -1   4  -6 540.229 92.8725   1
  -1   4  -6 965.013 68.1628   3
  -1   4  -7 2142.97 111.028   3
  -1   4  -7 2251.43 150.836   4
   1  -4   8 12379.4 308.125   3
  -1   4  -8 13307.0 329.636   3
  -1   4  -8 13424.3 410.820   4
  -1   4  -9 18619.8 440.668   3
   1  -4   9 18055.3 404.499   3
  -1   4  -9 17695.0 508.264   4
   1  -4  10 1301.99 98.8318   3
  -1   4 -10 1582.37 123.717   3
  -1   4 -10 1603.59 147.300   4
  -1   4 -11 7391.93 293.056   3
  -1   4 -11 7257.07 330.447   4
  -1   4 -12 1231.04 144.865   4
  -1   4 -12 1337.07 133.008   3
  -1   4 -13 254.182 74.9775   3
  -1   4 -13 116.927 62.1340   4
  -1   4 -14 5572.83 325.291   4
  -1   4 -14 5442.51 291.991   3
  -1   4 -15 10623.9 474.952   4
  -1   4 -15 10429.0 426.670   3
  -1   4 -16 8629.82 439.650   4
  -1   4 -16 8903.27 396.466   3
  -1   4 -17 1121.01 166.989   4
  -1   4 -18 260.874 101.749   4
  -1   4 -19 392.139 122.069   4
   1  -3 -19 14.4016 89.0304   3
   1  -3 -18 713.227 147.075   3
   1  -3 -17 9679.62 431.612   1
   1  -3 -17 9195.46 497.478   3
   1  -3 -16 14023.4 511.775   1
   1  -3 -16 13428.6 569.984   3
   1  -3 -15 2397.36 228.489   3
   1  -3 -15 1992.51 184.190   1
   1  -3 -14 1488.75 155.227   1
   1  -3 -14 1464.64 175.749   3
   1  -3 -13 864.142 117.184   1
   1  -3 -13 785.206 141.501   3
   1  -3 -12 1739.99 177.943   3
   1  -3 -12 1741.85 155.605   1
   1  -3 -11 16561.4 550.177   3
   1  -3 -11 17018.8 493.718   1
   1  -3 -10 35768.2 760.485   1
   1  -3 -10 34478.6 825.789   3
   1  -3  -9 41773.3 926.225   3
   1  -3  -9 44943.2 863.430   1
   1  -3  -8 3737.93 188.976   1
   1  -3  -8 3337.52 212.149   3
   1  -3  -7 2605.04 151.757   1
  -1   3   7 2574.11 153.371   1
   1  -3  -7 2130.93 168.541   3
   1  -3  -6 143.974 60.7622   3
   1  -3  -6 133.233 32.0442   4
   1  -3  -6 126.257 47.7253   1
  -1   3   6 166.283 46.1201   1
  -1   3   5 887.715 88.2218   1
   1  -3  -5 896.447 84.3873   1
   1  -3  -5 775.542 89.9686   3
   1  -3  -5 816.067 58.4353   4
  -1   3   5 1022.77 101.555   3
   1  -3  -4 2679.95 144.291   3
  -1   3   4 2766.17 139.408   1
   1  -3  -4 2387.91 90.3285   4
  -1   3   4 2600.97 142.336   3
   1  -3  -4 2527.72 133.383   1
   1  -3  -3 23312.5 379.929   4
  -1   3   3 22986.3 473.252   1
   1  -3  -3 22941.5 470.321   1
  -1   3   3 23702.4 386.881   4
  -1   3   3 24235.8 489.159   3
   1  -3  -3 24218.0 484.936   3
   1  -3  -2 10711.6 277.165   1
  -1   3   2 11217.6 210.804   4
  -1   3   2 11150.9 282.645   1
   1  -3  -2 11100.5 208.528   4
  -1   3   2 11526.6 279.031   3
  -1   3   1 7433.97 159.697   4
  -1   3   1 7554.24 199.525   3
   1  -3  -1 7277.82 160.234   4
  -1   3   1 7615.45 216.781   1
   1  -3  -1 7045.38 209.947   1
   1  -3   0 11046.7 265.674   1
   1  -3   0 11455.1 230.562   4
  -1   3   0 11393.9 271.680   1
  -1   3   0 10840.8 223.617   4
   1  -3   1 36630.7 614.708   1
   1  -3   1 35468.4 593.873   2
  -1   3  -1 36686.7 614.316   1
   1  -3   1 35351.7 579.999   4
  -1   3  -1 35365.4 576.990   4
  -1   3  -2 101302. 1495.62   2
   1  -3   2 106780. 1513.41   1
   1  -3   2 100785. 1493.13   2
  -1   3  -2 102850. 1491.53   4
  -1   3  -2 107724. 1512.42   1
  -1   3  -3 16435.7 391.696   1
  -1   3  -3 19123.6 383.417   2
  -1   3  -3 18201.5 381.979   4
  -1   3  -4 1051.31 84.8199   1
  -1   3  -4 1138.75 65.6348   3
  -1   3  -4 1152.94 86.2452   2
  -1   3  -5 385.894 46.7080   3
   1  -3   6 3270.02 129.799   3
  -1   3  -6 3519.67 136.051   3
  -1   3  -7 2559.49 126.580   3
   1  -3   7 2644.16 121.423   3
  -1   3  -8 36760.1 688.979   3
   1  -3   8 35520.5 661.079   3
   1  -3   9 52096.0 909.144   3
  -1   3  -9 52171.9 941.068   3
  -1   3 -10 5065.31 232.952   3
  -1   3 -11 677.971 103.958   3
  -1   3 -12 2250.04 172.753   3
  -1   3 -13 4738.64 260.897   3
  -1   3 -14 3299.29 227.454   3
  -1   3 -14 2991.09 228.141   4
  -1   3 -15 83.7813 56.7618   3
  -1   3 -15 61.9539 57.4195   4
  -1   3 -16 1123.42 158.707   4
  -1   3 -16 1319.01 165.655   3
  -1   3 -17 353.348 96.0270   3
  -1   3 -17 443.273 112.827   4
  -1   3 -18 270.127 102.388   3
  -1   3 -18 211.720 91.4485   4
  -1   3 -19 3651.01 310.172   4
  -1   3 -20 7153.53 443.118   4
   1  -2 -20 1060.41 183.337   3
   1  -2 -19 496.277 130.809   3
   1  -2 -18 1463.74 175.314   1
   1  -2 -18 1079.25 173.122   3
   1  -2 -17 9817.51 413.817   4
   1  -2 -17 9092.80 474.806   3
   1  -2 -17 10664.4 451.675   1
   1  -2 -16 12797.3 535.334   3
   1  -2 -16 13149.6 493.625   1
   1  -2 -15 1220.02 169.541   3
   1  -2 -15 1160.59 145.960   1
   1  -2 -14 607.630 99.4020   1
   1  -2 -14 583.157 127.463   3
   1  -2 -13 9.80341 52.8909   1
   1  -2 -13 108.251 76.5565   3
   1  -2 -12 2103.49 169.697   1
   1  -2 -12 1948.57 181.340   3
   1  -2 -11 6148.61 314.579   3
   1  -2 -11 6718.20 286.323   1
   1  -2 -10 129.769 60.6184   3
   1  -2 -10 60.8335 42.1792   1
   1  -2  -9 5981.26 246.882   1
   1  -2  -9 5481.96 273.082   3
   1  -2  -8 757.927 87.1761   1
   1  -2  -8 570.474 95.1435   3
   1  -2  -7-9.95601 51.4057   3
   1  -2  -7 67.2486 44.3510   1
   1  -2  -6 48574.0 841.044   1
   1  -2  -6 46142.6 874.989   3
  -1   2   6 49516.5 901.621   3
  -1   2   5 86548.3 1342.85   1
   1  -2  -5 88215.2 1339.63   1
   1  -2  -5 87295.5 1379.40   3
  -1   2   5 89102.0 1388.72   3
  -1   2   4 119235. 1732.47   3
   1  -2  -4 116671. 1695.36   1
  -1   2   4 116581. 1698.68   1
   1  -2  -4 114499. 1720.57   3
  -1   2   3 28711.1 506.489   3
  -1   2   3 27575.2 497.372   1
   1  -2  -3 25719.8 403.163   4
   1  -2  -3 27309.2 489.237   1
   1  -2  -3 26547.9 497.159   3
  -1   2   2 12131.9 274.288   1
  -1   2   2 13091.0 274.092   3
   1  -2  -2 12519.3 276.065   1
  -1   2   1 14817.2 297.325   1
   1  -2  -1 14849.8 296.987   1
   1  -2   0 11418.2 240.614   1
  -1   2   0 12028.7 207.228   4
  -1   2   0 11518.7 241.125   1
  -1   2  -1 23204.4 389.950   2
   1  -2   1 23350.0 400.145   1
   1  -2   1 22880.1 386.735   2
  -1   2  -1 24218.8 400.652   1
  -1   2  -2 28446.6 497.504   1
   1  -2   2 31393.1 498.271   1
  -1   2  -2 31176.7 501.817   2
  -1   2  -3 27029.7 450.743   3
  -1   2  -3 28116.0 474.580   1
   1  -2   4 10761.6 238.812   3
  -1   2  -4 11536.8 246.164   3
  -1   2  -5 2017.84 99.8802   3
   1  -2   5 2073.07 98.6746   3
   1  -2   6 42913.7 724.216   3
  -1   2  -6 42634.1 734.296   3
   1  -2   7 44946.6 790.011   3
  -1   2  -7 46170.9 809.767   3
  -1   2  -8 818.962 90.2281   3
   1  -2   8 813.141 80.7803   3
  -1   2  -9 290.694 68.2429   3
  -1   2 -10 1956.82 152.516   3
  -1   2 -11 456.831 90.0246   3
  -1   2 -12 5314.32 275.233   3
  -1   2 -13 44416.0 984.221   3
  -1   2 -14 36019.8 885.195   3
  -1   2 -15 6869.17 354.701   3
  -1   2 -16 1216.80 168.902   3
  -1   2 -17 1086.78 162.182   3
  -1   2 -17 763.932 136.181   4
  -1   2 -17 831.294 132.671   1
  -1   2 -18-67.5501 85.9902   4
  -1   2 -18 25.1780 79.1822   3
  -1   2 -19 2222.57 234.306   4
  -1   2 -19 2273.97 240.582   3
  -1   2 -20 7056.04 436.166   4
   1  -1 -20-40.5617 102.048   3
   1  -1 -19 1064.76 177.474   3
   1  -1 -18 7021.46 378.281   1
   1  -1 -18 6414.07 389.451   3
   1  -1 -18 6460.60 360.917   4
   1  -1 -17 438.646 126.171   3
   1  -1 -17 621.382 116.516   4
   1  -1 -17 729.682 120.961   1
   1  -1 -16 191.789 92.8000   3
   1  -1 -16 14.6752 48.1309   4
   1  -1 -16 123.036 73.1455   1
   1  -1 -15 225.001 74.6698   3
   1  -1 -15 240.772 78.2333   4
   1  -1 -15 223.439 78.5406   1
   1  -1 -14-44.4298 64.5216   1
   1  -1 -14 33.5839 57.4054   3
   1  -1 -13 456.848 87.1157   1
   1  -1 -13 309.077 95.4550   3
   1  -1 -12 19679.1 596.211   3
   1  -1 -12 21621.1 571.252   1
   1  -1 -11 35767.1 759.086   1
   1  -1 -11 33144.5 793.297   3
   1  -1 -10 4754.63 254.971   3
   1  -1 -10 5327.37 243.703   1
   1  -1  -9 1091.28 109.122   1
   1  -1  -9 914.232 110.664   3
   1  -1  -8 6663.30 261.877   3
   1  -1  -8 6407.66 238.995   1
   1  -1  -7 20027.5 491.894   3
  -1   1   7 20960.6 529.113   3
   1  -1  -7 21915.4 472.294   1
   1  -1  -6 612.735 82.3220   3
  -1   1   6 496.429 71.6365   3
   1  -1  -6 505.509 63.5611   1
  -1   1   5 17238.6 392.344   3
   1  -1  -5 16388.6 361.984   1
   1  -1  -5 16148.9 377.823   3
  -1   1   4 40468.9 696.815   3
   1  -1  -4 41298.5 682.920   1
   1  -1  -4 42070.0 694.040   3
   1  -1  -3 246.731 43.2610   3
   1  -1  -3 271.329 45.0081   1
  -1   1   3 231.187 41.7566   3
  -1   1   2 2953.40 102.049   1
   1  -1  -2 2835.66 101.442   1
  -1   1   2 3120.05 100.477   3
   1  -1  -1 64472.3 921.150   1
  -1   1   1 65383.9 922.170   1
   1  -1   0 72904.9 1012.81   1
  -1   1   0 74117.4 1014.08   1
  -1   1  -1 106277. 1420.68   1
   1  -1   1 105507. 1419.52   1
   1  -1   2 9166.54 189.938   3
  -1   1  -2 9368.40 172.393   1
  -1   1  -2 9502.95 192.438   3
  -1   1  -3 2231.21 90.1549   3
   1  -1   3 2159.31 90.7991   3
  -1   1  -4 12386.4 275.032   3
   1  -1   4 12116.6 272.996   3
  -1   1  -5 12075.0 292.598   3
   1  -1   5 11203.3 284.014   3
   1  -1   6 88599.0 1377.09   3
  -1   1  -6 91292.4 1393.34   3
  -1   1  -7 98006.9 1534.66   3
   1  -1   7 97516.5 1518.14   3
   1  -1   8 38625.1 760.342   3
  -1   1  -8 39886.1 787.553   3
  -1   1  -9 3800.33 209.735   3
  -1   1 -10 318.035 82.2476   3
  -1   1 -11 27.0958 58.0489   3
  -1   1 -12 384.120 86.9563   3
  -1   1 -13 12509.8 476.212   3
  -1   1 -14 10188.8 378.997   1
  -1   1 -14 10146.8 429.731   3
  -1   1 -15 625.562 100.955   1
  -1   1 -15 703.972 138.140   3
  -1   1 -16 1988.32 209.601   3
  -1   1 -16 1548.41 158.634   1
  -1   1 -17 1493.39 188.731   3
  -1   1 -17 1526.77 163.902   1
  -1   1 -18 57.7608 73.0447   3
  -1   1 -19-68.8393 86.7493   3
  -1   1 -19 6.30258 70.1863   4
  -1   1 -20 677.518 149.211   3
  -1   1 -20 474.246 119.874   4
   1   0 -20-104.478 105.753   3
   1   0 -19 4401.13 310.589   4
   1   0 -19 4549.07 314.763   1
   1   0 -19 4183.28 322.904   3
   1   0 -18 6986.41 383.661   1
   1   0 -18 5989.72 369.616   3
   1   0 -18 6251.17 355.674   4
   1   0 -17 3766.33 264.985   4
   1   0 -17 3523.29 259.415   1
   1   0 -17 3071.89 261.188   3
   1   0 -16 864.353 140.481   3
   1   0 -16 852.406 130.383   1
   1   0 -16 882.460 127.276   4
   1   0 -15 511.927 104.184   3
   1   0 -15 762.873 115.350   4
   1   0 -15 432.239 92.6948   1
   1   0 -14 11931.0 442.882   1
   1   0 -14 11341.4 448.282   3
   1   0 -14 12124.5 432.161   4
   1   0 -13 4501.27 259.224   1
   1   0 -13 4646.10 248.415   4
   1   0 -13 4863.53 269.131   3
   1   0 -12 2646.81 192.073   3
   1   0 -12 2875.34 185.810   4
   1   0 -11 650.610 95.4218   3
   1   0 -10 9.39975 47.2985   3
   1   0  -9 2427.27 156.699   3
  -1   0   8 11239.0 347.702   3
   1   0  -8 10961.1 331.146   3
  -1   0   7 82007.0 1317.27   3
   1   0  -7 80913.0 1290.67   3
  -1   0   6 96393.5 1478.38   3
   1   0  -6 95469.9 1448.38   3
  -1   0   5 10886.7 282.119   3
   1   0  -5 11168.1 270.885   3
   1   0  -5 11392.8 261.936   4
   1   0  -4 12708.5 272.721   3
   1   0  -4 13013.0 268.149   4
  -1   0   4 12632.0 275.634   3
   1   0  -3 8503.61 187.783   4
   1   0  -3 8969.17 187.725   3
  -1   0   3 8987.55 192.124   3
  -1   0   2 12724.4 222.717   4
  -1   0   2 12359.3 216.039   3
   1   0  -2 12404.2 220.587   4
  -1   0   1 84622.1 1141.35   4
   1   0  -1 83218.8 1140.59   4
  -1   0   0 119427. 1569.06   3
   1   0   0 115383. 1583.52   4
   1   0   1 55927.4 803.122   3
  -1   0  -1 57164.5 811.221   4
  -1   0  -1 56819.8 802.457   3
   1   0   2 4193.32 124.808   3
  -1   0  -2 4264.32 125.199   3
   1   0   3 23901.1 440.332   3
  -1   0  -3 24636.9 441.456   3
  -1   0  -4 466.952 64.1860   3
   1   0   4 260.753 48.3451   3
   1   0   5 6923.85 226.980   3
  -1   0  -5 7541.29 242.482   3
   1   0   6 30897.5 620.488   3
  -1   0  -6 30908.3 633.653   3
  -1   0  -7 5511.68 235.667   3
   1   0   7 5051.83 218.386   3
  -1   0  -8 2265.14 161.589   3
  -1   0  -9 37663.6 690.077   1
  -1   0  -9 37377.2 815.981   3
  -1   0 -10 23503.7 634.125   3
  -1   0 -10 24755.8 526.744   1
  -1   0 -11 206.836 79.5815   3
  -1   0 -11 224.972 57.9118   1
  -1   0 -12 100.714 49.5642   1
  -1   0 -12 84.3254 62.8486   3
  -1   0 -13 371.271 102.028   3
  -1   0 -13 303.979 69.7048   1
  -1   0 -14 1271.47 127.974   1
  -1   0 -14 1093.98 155.158   3
  -1   0 -15 6732.58 304.043   1
  -1   0 -15 5943.28 352.102   3
  -1   0 -16 12352.3 439.730   1
  -1   0 -16 11799.6 514.830   3
  -1   0 -17 3310.36 282.748   3
  -1   0 -18 2008.17 225.997   3
  -1   0 -19 574.375 137.110   3
  -1   0 -20 64.1284 98.5242   3
  -1   0 -20-33.7684 80.5621   4
   1   1 -20 3753.53 301.799   4
   1   1 -19 1096.63 165.065   4
   1   1 -19 862.342 148.647   1
   1   1 -18 0.27570 60.7849   3
   1   1 -18-69.9590 70.0641   4
   1   1 -18 53.8113 64.9710   1
   1   1 -17 3.69551 65.1650   1
   1   1 -17-10.0189 56.0981   3
   1   1 -17 16.5807 57.3812   4
   1   1 -16 450.421 99.3020   4
   1   1 -16 307.526 80.5805   3
   1   1 -15 3480.42 240.797   4
   1   1 -15 3196.79 229.127   3
   1   1 -14 23416.3 652.005   4
   1   1 -14 22400.4 635.240   3
   1   1 -13 35676.2 826.669   4
   1   1 -13 34299.0 800.191   3
   1   1 -12 11207.8 396.729   4
   1   1 -12 10648.4 381.030   3
   1   1 -11 380.693 75.5790   4
   1   1 -11 392.336 76.8795   3
   1   1 -10 319.273 62.1884   3
   1   1 -10 250.054 59.8451   4
   1   1  -9 483.350 79.6313   3
   1   1  -9 675.010 87.2678   4
  -1  -1   9 552.001 73.3998   3
   1   1  -8 11322.1 333.008   4
  -1  -1   8 10614.0 312.439   3
   1   1  -8 10711.8 310.819   3
  -1  -1   7 53817.0 925.526   3
   1   1  -7 59574.8 963.463   4
   1   1  -7 54654.5 916.103   3
   1   1  -6 46848.0 760.720   3
   1   1  -6 47732.3 806.576   4
  -1  -1   6 45747.2 771.109   3
  -1  -1   5 3601.23 129.209   3
   1   1  -5 3568.56 146.636   4
   1   1  -5 3502.09 121.456   3
   1   1  -4 34147.5 597.794   4
  -1  -1   4 36501.2 604.761   4
   1   1  -4 34849.2 543.409   3
  -1  -1   4 35923.4 558.405   3
  -1  -1   3 40710.5 592.395   3
  -1  -1   3 41788.7 662.084   4
   1   1  -3 42118.0 658.647   4
   1   1  -2 70.3561 30.0896   4
   1   1  -2 87.4060 25.1709   2
  -1  -1   2 99.0068 29.9879   4
  -1  -1   1 4360.21 123.630   4
  -1  -1   1 4612.82 114.258   2
   1   1  -1 4484.75 126.648   4
  -1  -1   0 33540.0 525.354   4
   1   1   0 33303.8 493.801   3
  -1  -1   0 33751.7 496.814   3
   1   1   0 33130.8 525.542   4
   1   1   1 3649.31 116.514   4
   1   1   1 3373.00 90.5957   1
  -1  -1  -1 3343.11 92.1618   1
  -1  -1  -1 3700.12 116.012   3
   1   1   1 3668.75 112.322   3
  -1  -1  -1 4244.41 122.575   4
   1   1   2 55321.5 765.125   1
   1   1   2 51673.6 827.956   4
  -1  -1  -2 54410.6 841.359   3
  -1  -1  -2 52572.6 819.556   4
   1   1   2 52894.3 836.251   3
  -1  -1  -2 54846.4 762.335   1
  -1  -1  -3 67159.0 1016.80   4
   1   1   3 65548.1 1042.45   3
   1   1   3 66454.4 946.092   1
  -1  -1  -3 66964.6 945.594   1
  -1  -1  -3 70193.7 1056.95   3
  -1  -1  -4 13022.4 337.857   3
   1   1   4 12665.0 249.615   1
   1   1   4 12913.5 330.228   3
  -1  -1  -4 13056.9 251.631   1
  -1  -1  -5 139.074 31.7765   1
   1   1   5 41.7569 42.7253   3
  -1  -1  -6 743.721 99.1071   3
   1   1   6 751.146 93.9138   3
  -1  -1  -6 704.720 59.1217   1
  -1  -1  -7 209.033 68.6291   3
  -1  -1  -7 65.8154 30.8390   1
  -1  -1  -8 9596.16 266.281   1
  -1  -1  -8 9996.71 363.747   3
  -1  -1  -9 55638.4 1083.46   3
  -1  -1  -9 53485.7 916.467   1
  -1  -1 -10 9533.36 288.007   1
  -1  -1 -10 7352.72 342.685   3
  -1  -1 -11 2711.12 157.214   1
  -1  -1 -11 2807.15 218.770   3
  -1  -1 -12 2337.32 201.797   3
  -1  -1 -12 2571.92 161.898   1
  -1  -1 -13 646.900 129.712   3
  -1  -1 -13 802.115 99.1604   1
  -1  -1 -14 1469.94 175.751   3
  -1  -1 -14 1507.89 136.206   1
  -1  -1 -15 37.5387 80.1369   3
  -1  -1 -15-26.4379 53.0493   1
  -1  -1 -16 1535.49 193.489   3
  -1  -1 -16 1456.12 144.033   1
  -1  -1 -17 338.802 110.309   3
  -1  -1 -18 2414.07 252.632   3
  -1  -1 -19 2274.26 253.403   3
   1   2 -20 6534.18 405.025   4
   1   2 -20 6299.96 407.651   1
   1   2 -19 2288.76 238.588   1
   1   2 -19 2174.21 226.109   4
   1   2 -18 636.407 128.897   4
   1   2 -17 260.199 88.1415   4
   1   2 -17 169.424 79.8728   3
   1   2 -16 33.6888 61.9091   4
   1   2 -16 6.85264 51.3406   3
   1   2 -15 3229.29 238.823   4
   1   2 -15 2941.60 220.855   3
   1   2 -14 9769.45 407.892   4
   1   2 -14 9077.37 368.210   3
   1   2 -13 5426.37 287.711   4
   1   2 -13 4808.96 251.206   3
   1   2 -12 201.226 67.4843   4
   1   2 -12 218.930 64.1986   3
   1   2 -11 21311.5 520.131   3
   1   2 -11 20958.2 569.123   4
  -1  -2  10 19773.5 465.255   3
   1   2 -10 20878.7 537.948   4
   1   2 -10 19326.4 472.590   3
   1   2  -9 94.8168 51.1934   4
   1   2  -9 100.070 41.8205   3
  -1  -2   9 30.9937 29.5185   3
   1   2  -8 3821.13 191.313   4
  -1  -2   8 3602.54 148.134   3
   1   2  -8 3428.16 154.069   3
  -1  -2   7 9223.69 234.647   3
   1   2  -7 9178.77 292.039   4
   1   2  -7 8862.01 236.301   3
  -1  -2   6 12047.2 254.677   3
   1   2  -6 12261.6 259.073   3
   1   2  -6 12639.4 337.491   4
  -1  -2   5 50902.2 751.842   3
  -1  -2   5 54863.0 886.930   4
   1   2  -5 54403.3 886.010   4
   1   2  -5 51439.0 758.207   3
  -1  -2   4 106963. 1574.31   4
   1   2  -4 107103. 1556.87   2
   1   2  -4 104939. 1568.36   4
  -1  -2   3 46301.9 764.129   4
   1   2  -3 46136.4 759.327   4
   1   2  -3 46853.0 749.338   2
  -1  -2   2 1869.98 97.4971   4
   1   2  -2 1885.00 97.8777   4
   1   2  -2 1845.10 92.4746   2
  -1  -2   2 1836.83 89.4747   2
  -1  -2   1 9383.45 214.822   2
   1   2  -1 9290.78 170.191   3
  -1  -2   1 9486.80 227.676   4
  -1  -2   1 9149.21 176.815   3
   1   2  -1 9434.47 230.300   4
   1   2   0 206.761 41.9806   4
  -1  -2   0 248.157 41.1040   4
  -1  -2   0 194.700 37.9330   3
   1   2   0 254.195 40.5465   1
   1   2   0 299.039 39.1421   3
   1   2   1 14787.2 313.251   3
  -1  -2  -1 15242.5 299.780   1
  -1  -2  -1 15339.1 315.005   4
   1   2   1 14962.0 296.499   1
   1   2   1 15316.9 314.723   4
  -1  -2  -1 14591.8 321.209   3
  -1  -2  -2 31969.5 584.505   3
  -1  -2  -2 31983.8 552.376   4
  -1  -2  -2 31383.1 522.803   1
   1   2   2 33195.5 559.312   4
   1   2   2 31921.4 522.945   1
   1   2   2 30318.7 572.971   3
  -1  -2  -3 10394.1 295.283   3
  -1  -2  -3 10008.7 227.990   1
  -1  -2  -3 9522.15 256.459   4
   1   2   3 10739.5 294.832   3
   1   2   3 9593.20 262.827   4
   1   2   3 10002.8 228.098   1
  -1  -2  -4 369.728 44.8367   1
   1   2   4 437.033 46.5532   1
   1   2   4 389.570 66.2699   3
  -1  -2  -4 339.853 73.3994   3
  -1  -2  -4 305.580 51.6111   4
  -1  -2  -5 16961.5 447.184   3
  -1  -2  -5 16541.6 391.625   4
  -1  -2  -5 16490.2 346.758   1
   1   2   5 16655.3 441.811   3
   1   2   5 17089.3 351.595   1
  -1  -2  -6 223.196 69.9213   3
   1   2   6 181.757 39.9645   1
  -1  -2  -6 217.337 42.3890   1
  -1  -2  -6 269.955 52.4612   4
  -1  -2  -7 2855.87 193.829   3
  -1  -2  -7 3175.51 141.555   1
  -1  -2  -8 1347.04 141.625   3
  -1  -2  -8 1246.00 93.0867   1
  -1  -2  -9 1207.78 137.719   3
  -1  -2  -9 1068.28 91.2765   1
  -1  -2 -10 2071.72 132.489   1
  -1  -2 -10 2041.87 183.253   3
  -1  -2 -11 10076.9 321.992   1
  -1  -2 -11 10372.3 426.654   3
  -1  -2 -12 9146.50 317.844   1
  -1  -2 -12 9725.05 426.229   3
  -1  -2 -13 105.687 58.3836   1
  -1  -2 -13 100.502 89.2623   3
  -1  -2 -14 4593.94 237.709   1
  -1  -2 -14 4671.38 310.178   3
  -1  -2 -15 378.096 80.7828   1
  -1  -2 -15 427.677 117.781   3
  -1  -2 -16 35.5905 91.2692   3
  -1  -2 -17 27.5225 77.8155   3
  -1  -2 -18 929.665 178.035   3
  -1  -2 -19 887.752 174.086   3
   1   3 -20 2092.09 238.180   4
   1   3 -19 491.253 125.663   4
   1   3 -18 8209.82 437.932   4
   1   3 -17 8610.40 437.767   4
   1   3 -16 1676.03 189.369   4
   1   3 -15 18.8408 56.1662   4
   1   3 -15 24.4849 53.1368   3
   1   3 -14 1569.08 145.428   3
   1   3 -14 1630.66 166.915   4
   1   3 -13 268.699 64.3680   3
   1   3 -13 246.910 75.2603   4
   1   3 -12 9763.62 325.374   3
   1   3 -12 9944.85 390.707   4
  -1  -3  11 25509.2 538.524   3
   1   3 -11 25278.1 657.095   4
   1   3 -11 25767.5 557.005   3
   1   3 -10 7261.40 239.115   3
   1   3 -10 7245.45 308.204   4
  -1  -3  10 7507.56 234.198   3
   1   3  -9 170.939 60.3219   4
  -1  -3   9 116.088 29.1295   3
   1   3  -9 150.942 39.7162   3
   1   3  -8 306.339 43.6217   3
  -1  -3   8 285.291 37.1460   3
   1   3  -8 168.095 69.6675   4
   1   3  -7 35.3025 22.4299   3
   1   3  -7 31.7301 43.7748   4
  -1  -3   7 29.1901 16.4623   3
   1   3  -6 10981.5 207.433   3
   1   3  -6 11485.8 334.831   4
  -1  -3   6 10574.0 195.566   3
   1   3  -5 5717.51 211.372   2
  -1  -3   5 5466.76 215.277   4
   1   3  -5 4961.95 211.926   4
  -1  -3   4 5258.11 200.460   4
   1   3  -4 5011.83 189.387   2
   1   3  -4 4965.14 193.981   4
   1   3  -3 23037.3 487.803   4
  -1  -3   3 23980.7 480.317   2
  -1  -3   3 24561.8 497.290   4
   1   3  -3 25222.3 488.078   2
  -1  -3   2 12396.1 307.385   4
  -1  -3   2 12002.8 294.198   2
   1   3  -2 12516.0 313.437   1
   1   3  -2 12025.9 205.383   3
   1   3  -2 12371.4 306.191   4
   1   3  -1 19025.7 397.119   1
   1   3  -1 17240.1 320.527   3
  -1  -3   1 17945.3 318.108   3
   1   3  -1 18484.6 388.877   4
  -1  -3   1 17742.6 384.058   4
  -1  -3   0 7691.35 200.531   3
  -1  -3   0 7520.54 219.988   1
  -1  -3   0 7747.50 224.014   4
   1   3   0 7537.29 221.757   4
   1   3   0 7555.09 221.701   1
   1   3   0 7290.97 198.481   3
   1   3   1 33557.3 611.784   3
  -1  -3  -1 35265.0 615.964   4
  -1  -3  -1 35543.6 614.074   1
   1   3   1 34354.5 605.354   1
   1   3   1 34161.5 611.497   4
  -1  -3  -1 33702.2 607.326   3
   1   3   2 6248.62 195.194   1
  -1  -3  -2 6504.90 206.588   4
   1   3   2 6372.71 207.630   4
   1   3   2 6311.99 222.258   3
  -1  -3  -2 6598.06 199.806   1
  -1  -3  -2 6161.44 217.555   3
   1   3   3 4464.15 163.389   1
   1   3   3 4712.51 201.638   3
   1   3   3 4380.84 168.919   4
  -1  -3  -3 4374.92 160.931   1
  -1  -3  -3 4310.39 193.249   3
  -1  -3  -3 4559.24 172.928   4
   1   3   4 14546.6 410.418   3
   1   3   4 15133.5 364.061   4
  -1  -3  -4 14705.2 359.288   4
  -1  -3  -4 14565.3 336.918   1
   1   3   4 14691.2 340.246   1
  -1  -3  -4 15087.6 407.332   3
  -1  -3  -5 30996.2 685.136   3
   1   3   5 30578.7 578.106   1
  -1  -3  -5 31050.1 612.904   4
  -1  -3  -5 31162.3 579.555   1
  -1  -3  -6 223.587 74.4160   3
   1   3   6 195.889 41.0446   1
  -1  -3  -6 200.069 47.9707   1
  -1  -3  -6 424.402 62.7624   4
  -1  -3  -7 7026.90 236.648   1
  -1  -3  -7 6813.45 253.997   4
   1   3   7 7011.37 237.854   1
  -1  -3  -7 7067.97 307.402   3
  -1  -3  -8 1302.28 101.609   1
   1   3   8 1149.10 95.2008   1
  -1  -3  -8 1334.81 141.134   3
  -1  -3  -9 183.635 89.4910   3
  -1  -3  -9 206.272 48.7708   1
  -1  -3 -10 3117.97 170.333   1
  -1  -3 -10 3049.65 232.189   3
  -1  -3 -11 1506.70 124.110   1
  -1  -3 -11 1287.93 165.863   3
  -1  -3 -12 6475.19 357.411   3
  -1  -3 -12 5915.10 256.912   1
  -1  -3 -13 253.130 113.690   3
  -1  -3 -13 180.013 58.3991   1
  -1  -3 -14-19.5269 42.7217   1
  -1  -3 -14 22.8553 87.0640   3
  -1  -3 -15 1426.01 192.482   3
  -1  -3 -15 1275.52 137.842   1
  -1  -3 -16 7436.06 441.218   3
  -1  -3 -17 3663.75 318.014   3
  -1  -3 -18-95.7782 105.358   3
   1   4 -19 281.550 109.312   4
   1   4 -18 1176.48 179.556   4
   1   4 -17 1745.14 202.256   4
   1   4 -16 232.058 93.5864   4
   1   4 -15 4641.44 308.450   4
   1   4 -14-7.64372 54.7999   4
   1   4 -13 4598.64 282.538   4
   1   4 -13 4563.30 210.638   3
   1   4 -12 605.068 77.2745   3
   1   4 -12 663.064 108.738   4
   1   4 -11 202.334 48.9956   3
  -1  -4  11 195.764 38.2750   3
  -1  -4  10 5088.93 162.924   3
   1   4 -10 5577.26 181.664   3
   1   4 -10 5485.83 278.612   4
   1   4  -9 16604.5 331.197   3
   1   4  -9 17045.7 503.899   4
  -1  -4   9 15769.5 310.088   3
   1   4  -8 21227.0 549.622   4
   1   4  -8 19784.6 355.050   3
   1   4  -7 155.354 55.3865   4
   1   4  -7 176.974 19.8741   3
   1   4  -6 20574.2 507.436   4
   1   4  -5 13672.2 384.579   4
   1   4  -4 2272.56 140.904   4
  -1  -4   4 2311.68 137.329   2
  -1  -4   3 7001.33 246.078   4
  -1  -4   3 6927.38 236.132   2
   1   4  -3 7102.96 248.651   4
   1   4  -3 6998.63 258.891   1
   1   4  -2 26741.6 449.256   3
  -1  -4   2 28039.7 569.747   4
   1   4  -2 28527.6 583.244   1
   1   4  -2 28059.3 567.172   4
  -1  -4   2 28558.8 560.823   2
   1   4  -1 13724.3 356.756   1
  -1  -4   1 13534.7 279.605   3
  -1  -4   1 14350.7 353.163   4
   1   4  -1 12914.1 338.870   4
   1   4  -1 12893.2 287.134   3
   1   4   0 743.926 72.2540   3
  -1  -4   0 804.740 78.8067   4
  -1  -4   0 786.429 67.9803   3
   1   4   0 934.739 84.5260   4
  -1  -4   0 774.456 82.2775   1
   1   4   0 839.317 79.9638   1
  -1  -4  -1 3201.72 148.996   3
  -1  -4  -1 3022.62 149.545   4
   1   4   1 3310.30 153.518   4
   1   4   1 3124.50 149.939   1
  -1  -4  -1 3517.96 160.789   1
   1   4   1 3189.90 152.879   3
  -1  -4  -2 2397.57 134.660   1
   1   4   2 2413.62 132.858   1
  -1  -4  -2 2492.25 134.252   4
   1   4   2 2525.01 135.586   4
   1   4   2 2518.44 146.586   3
  -1  -4  -2 2587.13 145.111   3
   1   4   3 13129.9 342.242   4
  -1  -4  -3 11987.1 330.997   4
   1   4   3 12416.7 369.880   3
   1   4   3 12176.2 326.711   1
  -1  -4  -3 12159.2 324.582   1
  -1  -4  -3 12446.6 362.263   3
   1   4   4 531.542 70.4103   4
  -1  -4  -4 543.816 66.6696   4
  -1  -4  -4 452.861 87.1695   3
  -1  -4  -4 508.261 66.0026   1
   1   4   4 593.579 75.8787   1
   1   4   5 3232.01 164.303   4
   1   4   5 3407.06 165.280   1
  -1  -4  -5 3164.13 159.396   4
  -1  -4  -5 3142.10 196.208   3
  -1  -4  -5 3105.66 155.236   1
  -1  -4  -6 3555.39 171.403   1
  -1  -4  -6 3597.37 182.450   4
  -1  -4  -6 3822.12 224.180   3
   1   4   6 3369.95 168.373   1
   1   4   7 503.866 68.7309   1
  -1  -4  -7 558.520 74.2717   1
  -1  -4  -7 459.534 102.592   3
  -1  -4  -8 3643.15 245.373   3
  -1  -4  -8 3606.48 182.244   1
   1   4   8 3563.33 183.956   1
  -1  -4  -9 31273.0 665.270   1
  -1  -4  -9 32154.2 817.573   3
  -1  -4 -10 33031.4 700.619   1
  -1  -4 -10 31454.2 857.317   3
  -1  -4 -11 2130.32 153.454   1
  -1  -4 -11 1992.71 206.509   3
  -1  -4 -12 120.171 59.6328   1
  -1  -4 -12 285.226 105.760   3
  -1  -4 -13 244.810 100.592   3
  -1  -4 -13 278.690 67.9329   1
  -1  -4 -14 109.744 80.7452   3
  -1  -4 -14 85.4010 50.3269   1
  -1  -4 -15 97.8053 83.3475   3
  -1  -4 -16 3105.30 289.396   3
  -1  -4 -17 3156.10 301.796   3
   1   5 -18 230.067 101.529   4
   1   5 -17 2397.48 246.833   4
   1   5 -16 8827.45 456.277   4
   1   5 -15 7422.65 398.566   4
   1   5 -14 70.4876 73.3377   4
   1   5 -13 5127.21 308.917   4
   1   5 -12 4797.88 288.060   4
   1   5 -11 22.5159 21.8475   3
   1   5 -11 100.263 58.5630   4
   1   5 -10 26.3364 18.2983   3
   1   5 -10-10.4094 57.1343   4
   1   5  -9 13895.5 459.045   4
   1   5  -8 6084.77 281.958   4
   1   5  -7 668.067 95.1669   4
   1   5  -6 616.710 89.0868   4
   1   5  -5 4709.46 223.811   4
   1   5  -4 37390.9 764.256   4
  -1  -5   4 38257.0 755.649   2
   1   5  -3 24699.5 407.822   3
   1   5  -3 25065.8 563.920   4
  -1  -5   3 25429.0 560.279   2
   1   5  -2 486.012 73.5431   4
  -1  -5   2 478.304 70.0163   2
   1   5  -2 413.964 44.5237   3
   1   5  -1 2925.16 132.818   3
   1   5  -1 3362.34 171.924   4
   1   5   0-6.24797 34.0140   3
   1   5   0 4.43533 40.1250   4
  -1  -5   0 41.3242 29.7030   3
  -1  -5   0 12.6071 44.8976   1
  -1  -5  -1 4359.62 200.562   1
  -1  -5  -1 4437.77 186.294   3
  -1  -5  -1 4311.98 196.735   4
   1   5   1 4618.52 198.459   4
   1   5   1 4467.88 198.075   3
   1   5   2 35132.6 719.712   3
  -1  -5  -2 35207.8 705.620   1
   1   5   2 35279.2 689.520   4
  -1  -5  -2 34373.7 686.250   4
  -1  -5  -2 34104.0 694.108   3
  -1  -5  -3 49409.4 936.475   3
   1   5   3 51133.9 907.819   4
  -1  -5  -3 50197.1 898.882   4
  -1  -5  -3 47542.3 899.510   1
  -1  -5  -4 22763.9 531.531   1
   1   5   4 23943.9 537.597   4
  -1  -5  -4 23488.1 587.967   3
  -1  -5  -5 3042.94 168.677   1
   1   5   5 3308.64 179.263   4
  -1  -5  -5 3123.78 202.801   3
  -1  -5  -6 290.400 81.7381   3
  -1  -5  -6 326.531 63.7542   1
  -1  -5  -7 9788.74 324.690   1
  -1  -5  -7 8953.00 386.105   3
  -1  -5  -8 1601.32 131.487   1
  -1  -5  -8 1791.89 177.704   3
  -1  -5  -9 1488.77 130.431   1
  -1  -5  -9 1543.56 171.876   3
  -1  -5 -10 915.446 106.325   1
  -1  -5 -10 985.362 151.825   3
  -1  -5 -11 434.428 123.189   3
  -1  -5 -11 523.377 83.8107   1
  -1  -5 -12-21.7956 43.6815   1
  -1  -5 -12 96.3691 79.4733   3
  -1  -5 -13 5369.87 268.804   1
  -1  -5 -13 5226.70 350.495   3
  -1  -5 -14 24463.0 824.428   3
  -1  -5 -15 17458.9 702.872   3
  -1  -5 -16 4197.77 349.492   3
   1   6 -17 474.324 123.225   4
   1   6 -16 1001.45 165.227   4
   1   6 -15 1416.96 191.486   4
   1   6 -14 331.749 104.362   4
   1   6 -13 123.840 73.3286   4
   1   6 -12 789.691 126.356   4
   1   6 -11 15907.4 560.609   4
   1   6 -10 15994.9 545.585   4
   1   6  -9 1243.07 139.871   4
   1   6  -8 103.536 51.1663   4
   1   6  -7 1109.66 126.434   4
   1   6  -6 1055.44 117.804   4
   1   6  -5 4038.12 221.013   4
  -1  -6   5 3917.21 216.014   2
   1   6  -4 38860.7 824.562   4
   1   6  -4 39507.8 574.944   3
  -1  -6   4 39901.4 817.673   2
   1   6  -3 29060.3 501.527   3
   1   6  -3 29951.1 673.048   4
  -1  -6   3 30315.2 668.141   2
   1   6  -2 3352.33 139.623   3
   1   6  -2 3372.73 191.921   4
  -1  -6   2 3426.09 190.912   2
   1   6  -1 1689.25 109.345   3
   1   6  -1 1599.48 128.646   4
  -1  -6   0 15432.0 373.964   3
  -1  -6   0 15361.1 445.456   1
   1   6   0 14509.7 390.008   3
   1   6   0 15097.7 420.559   4
  -1  -6  -1 26085.4 615.962   1
   1   6   1 25573.6 582.384   4
  -1  -6  -1 25508.3 558.856   3
   1   6   1 25647.9 584.939   3
   1   6   2 12936.5 382.999   4
  -1  -6  -2 13344.1 389.382   3
  -1  -6  -2 13380.1 409.183   1
  -1  -6  -3 27.6513 44.4939   3
   1   6   3-4.27008 38.6827   4
  -1  -6  -3-33.9095 51.1749   1
  -1  -6  -4 990.306 116.571   3
  -1  -6  -4 996.375 108.767   1
   1   6   4 1127.66 109.789   4
  -1  -6  -5-18.0040 56.2396   3
   1   6   5 65.5640 45.9253   4
  -1  -6  -5 77.9645 49.8424   1
   1   6   6 11138.8 374.368   4
  -1  -6  -6 11378.3 376.513   1
  -1  -6  -6 11354.6 429.534   3
  -1  -6  -7 59134.3 1099.42   1
  -1  -6  -7 57664.4 1214.73   3
  -1  -6  -8 59328.8 1269.02   3
  -1  -6  -8 60811.5 1129.72   1
  -1  -6  -9 31149.7 852.221   3
  -1  -6  -9 31463.6 724.740   1
  -1  -6 -10 3584.58 216.289   1
  -1  -6 -10 3390.71 273.424   3
  -1  -6 -11 505.021 89.0638   1
  -1  -6 -11 399.652 116.404   3
  -1  -6 -12-0.19256 55.3921   1
  -1  -6 -12-27.4320 84.3887   3
  -1  -6 -13 7652.71 444.099   3
  -1  -6 -13 8306.53 354.519   1
  -1  -6 -14 27486.5 904.846   3
  -1  -6 -15 21438.4 805.672   3
   1   7 -16 3890.88 318.988   4
   1   7 -15 15.1502 75.0207   4
   1   7 -14 113.047 71.7262   4
   1   7 -13 3242.74 262.703   4
   1   7 -12 49.0291 65.8999   4
   1   7 -11 5734.15 330.656   4
   1   7 -10 5949.63 327.372   4
   1   7  -9 5553.58 310.546   4
   1   7  -8 531.447 100.333   4
   1   7  -7 8917.79 370.757   4
   1   7  -6 44784.5 969.902   4
   1   7  -5 28237.2 700.921   4
  -1  -7   5 28579.4 702.172   2
  -1  -7   4 3180.42 202.781   2
   1   7  -4 2792.23 97.7451   3
   1   7  -4 2855.46 194.850   4
   1   7  -3 684.685 60.3692   3
   1   7  -3 453.495 84.9448   4
  -1  -7   3 721.768 99.8909   2
   1   7  -2 366.630 55.9620   3
   1   7  -2 545.058 88.5533   4
  -1  -7   2 549.768 87.8009   2
  -1  -7   1 9363.36 350.037   2
   1   7  -1 9715.71 348.943   4
   1   7  -1 9774.69 301.530   3
   1   7   0 51717.7 1011.66   4
   1   7   0 54219.2 975.259   3
  -1  -7  -1 118139. 1836.24   3
  -1  -7  -1 119539. 1944.64   1
   1   7   1 116973. 1885.76   4
  -1  -7  -2 65826.1 1237.46   1
   1   7   2 66445.1 1198.58   4
  -1  -7  -2 67129.8 1191.85   3
   1   7   3 6326.88 273.942   4
  -1  -7  -3 6318.34 289.230   1
  -1  -7  -3 6100.86 278.339   3
   1   7   4 1420.89 131.203   4
  -1  -7  -4 1485.06 142.609   1
  -1  -7  -4 1023.74 123.082   3
   1   7   5 359.458 71.6182   4
  -1  -7  -5 472.847 87.7971   1
  -1  -7  -5 288.147 73.7053   3
  -1  -7  -6 11193.2 446.853   3
  -1  -7  -6 11887.2 414.847   1
   1   7   6 11928.6 404.666   4
  -1  -7  -7 28008.2 773.755   3
  -1  -7  -7 27200.7 685.612   1
  -1  -7  -8 37383.0 841.507   1
  -1  -7  -8 36200.3 937.641   3
  -1  -7  -9 8674.85 427.806   3
  -1  -7  -9 8932.18 364.848   1
  -1  -7 -10 2188.61 179.722   1
  -1  -7 -10 2234.48 224.810   3
  -1  -7 -11 1199.87 137.118   1
  -1  -7 -11 1203.07 175.289   3
  -1  -7 -12 245.172 107.835   3
  -1  -7 -12 153.030 55.7199   1
  -1  -7 -13 1197.62 189.724   3
  -1  -7 -14 2222.45 259.307   3
   1   8 -15 87.8405 89.9981   4
   1   8 -14 5631.54 373.293   4
   1   8 -13 24981.4 804.791   4
   1   8 -12 24164.8 774.829   4
   1   8 -11 7834.16 401.234   4
   1   8 -10 139.327 61.2157   4
   1   8  -9 209.071 77.0432   4
   1   8  -8 1566.01 171.278   4
   1   8  -7 28063.5 758.820   4
   1   8  -6 68941.5 1352.63   4
  -1  -8   5 40719.6 920.957   2
   1   8  -5 39893.0 916.736   4
  -1  -8   4 6160.59 302.547   2
   1   8  -4 6183.62 301.094   4
  -1  -8   3-28.9678 62.1364   2
   1   8  -3 42.3161 31.6843   3
   1   8  -3 25.3175 47.7273   4
  -1  -8   2 1538.74 150.899   2
   1   8  -2 1533.75 150.844   4
   1   8  -2 1703.81 117.185   3
   1   8  -1 2700.01 189.708   4
  -1  -8   1 2440.95 188.870   2
   1   8  -1 2410.03 151.087   3
   1   8   0 21333.1 581.895   4
  -1  -8  -1 35910.2 854.801   1
   1   8   1 37064.5 818.416   4
  -1  -8  -2 3992.41 249.936   1
  -1  -8  -2 4203.83 226.072   3
   1   8   2 4538.47 243.438   4
  -1  -8  -3 3913.69 231.639   3
  -1  -8  -3 3481.46 230.974   1
   1   8   3 3976.43 227.946   4
  -1  -8  -4 7737.92 349.017   3
   1   8   4 8361.62 340.607   4
  -1  -8  -4 7961.35 356.194   1
  -1  -8  -5 5067.66 283.087   1
  -1  -8  -5 4698.10 281.292   3
   1   8   5 5314.06 268.407   4
  -1  -8  -6 946.911 136.813   3
   1   8   6 1165.20 132.608   4
  -1  -8  -6 1001.06 128.768   1
  -1  -8  -7 3574.32 238.125   1
  -1  -8  -7 3492.70 256.300   3
  -1  -8  -8 468.331 108.093   3
  -1  -8  -8 715.986 112.976   1
  -1  -8  -9 3638.40 284.374   3
  -1  -8  -9 3781.73 246.329   1
  -1  -8 -10 10656.3 506.854   3
  -1  -8 -10 10968.6 433.826   1
  -1  -8 -11 4220.36 324.846   3
  -1  -8 -11 4221.77 268.509   1
  -1  -8 -12-14.6269 80.3990   3
  -1  -8 -13 179.296 92.5396   3
   1   9 -14 5334.30 375.555   4
   1   9 -13 13419.4 589.424   4
   1   9 -12 18228.4 681.533   4
   1   9 -11 3341.77 271.917   4
   1   9 -10 1420.55 179.257   4
   1   9  -9 1128.56 159.891   4
   1   9  -8 1312.47 167.522   4
   1   9  -7 10085.7 439.865   4
  -1  -9   6 9437.57 415.665   2
   1   9  -6 8985.11 412.892   4
   1   9  -5 4578.90 290.435   4
  -1  -9   5 4861.90 290.634   2
  -1  -9   4 5267.26 297.783   2
   1   9  -4 5272.16 297.341   4
  -1  -9   3 28174.4 753.332   2
   1   9  -3 27942.0 740.468   4
   1   9  -2 7099.78 333.714   4
  -1  -9   2 6783.39 336.271   2
   1   9  -1 266.138 74.4208   4
  -1  -9   1 375.075 82.1467   2
   1   9   0 432.191 91.1926   4
   1   9   1 70.4949 50.1971   4
  -1  -9  -2 1312.23 153.921   1
   1   9   2 1218.32 135.987   4
  -1  -9  -3 8863.08 396.927   1
   1   9   3 8802.86 372.682   4
   1   9   4 13074.7 461.026   4
  -1  -9  -4 12266.4 477.641   1
  -1  -9  -4 12422.7 461.638   3
   1   9   5 1092.61 133.908   4
  -1  -9  -5 1266.57 153.373   1
  -1  -9  -5 1077.04 144.171   3
  -1  -9  -6 1527.35 178.379   3
   1   9   6 1534.21 160.898   4
  -1  -9  -6 1629.18 171.282   1
  -1  -9  -7 331.099 93.9251   3
  -1  -9  -7 371.569 88.7798   1
  -1  -9  -8 1155.90 151.754   1
  -1  -9  -8 1008.84 159.681   3
  -1  -9  -9-47.9126 80.8584   3
  -1  -9  -9-50.4455 62.1748   1
  -1  -9 -10 471.608 100.908   1
  -1  -9 -10 400.653 122.585   3
  -1  -9 -11 67.1184 82.2761   3
  -1  -9 -12 105.502 185.877   3
   1  10 -12 719.234 146.716   4
   1  10 -11 3308.90 286.885   4
   1  10 -10 11861.8 538.057   4
   1  10  -9 5891.68 366.958   4
   1  10  -8 418.152 111.988   4
   1  10  -7 155.057 83.4847   4
  -1 -10   6 17.6954 72.8483   2
   1  10  -6 203.553 89.6241   4
   1  10  -5 140.026 65.7272   4
  -1 -10   5 163.876 84.6549   2
  -1 -10   4 4724.78 299.810   2
   1  10  -4 4497.18 292.040   4
   1  10  -3 8555.94 400.945   4
  -1 -10   3 8663.55 410.238   2
   1  10  -2 790.129 127.847   4
  -1 -10   2 823.697 133.328   2
   1  10  -1 727.125 119.311   4
  -1 -10   1 598.250 114.015   2
   1  10   0 239.976 72.9071   4
  -1 -10   0 320.844 92.4205   2
   1  10   1 5284.27 297.977   4
   1  10   2 4756.14 287.145   4
  -1 -10  -3 171.696 85.8244   1
   1  10   3 174.599 63.0349   4
   1  10   4-37.0502 55.0783   4
  -1 -10  -4-43.0725 72.1552   1
  -1 -10  -5 479.099 114.649   1
   1  10   5 589.227 111.288   4
  -1 -10  -6 1530.66 182.022   1
   1  10   6 1356.94 159.800   4
  -1 -10  -7 646.476 124.109   1
  -1 -10  -7 782.998 146.111   3
  -1 -10  -8 5938.30 350.270   1
  -1 -10  -8 5989.00 378.306   3
  -1 -10  -9 4400.19 302.048   1
  -1 -10  -9 4417.20 333.127   3
  -1 -10 -10 326.496 112.072   3
  -1 -10 -11 39.6756 88.3797   3
   1  11 -10 884.462 160.899   4
   1  11  -9 309.467 107.718   4
   1  11  -8 703.938 143.593   4
   1  11  -7 131.318 87.3866   4
   1  11  -6 4917.18 332.602   4
  -1 -11   5 6785.05 390.762   2
   1  11  -5 5768.13 356.593   4
   1  11  -4 1449.40 176.140   4
  -1 -11   4 1651.46 196.491   2
  -1 -11   3 1052.84 157.465   2
   1  11  -3 1186.25 162.729   4
  -1 -11   2 1886.40 205.141   2
   1  11  -2 1913.07 197.401   4
  -1 -11   1 2895.60 252.180   2
   1  11  -1 2849.78 235.542   4
   1  11   0 283.697 90.5003   4
  -1 -11   0 277.550 102.030   2
  -1 -11  -1 6570.85 382.810   2
   1  11   1 7088.77 368.125   4
   1  11   2 10913.8 462.935   4
   1  11   3-18.5687 69.2195   4
   1  11   4 148.563 68.1220   4
   1  11   5 316.439 90.0116   4
  -1 -11  -5 233.295 95.2557   1
  -1 -11  -6 115.274 73.2572   1
   1  11   6 166.719 74.1874   4
  -1 -11  -7 158.959 70.3105   1
  -1 -11  -8 399.901 113.357   1
   1  12  -8 2902.82 283.018   4
   1  12  -7 514.302 117.589   4
   1  12  -6 1772.20 212.708   4
   1  12  -5 3035.99 270.962   4
  -1 -12   5 3110.04 276.610   2
  -1 -12   4 463.864 115.947   2
   1  12  -4 501.220 123.178   4
   1  12  -3 965.723 155.316   4
  -1 -12   3 1067.96 167.691   2
   1  12  -2 335.071 94.0053   4
  -1 -12   2 470.941 120.273   2
  -1 -12   1 795.234 151.353   2
   1  12  -1 716.781 127.472   4
   1  12   0 847.084 141.612   4
  -1 -12   0 822.041 154.689   2
  -1 -12  -1 499.609 118.194   2
   1  12   1 771.934 137.998   4
   1  12   2 309.165 98.1607   4
  -1 -12  -2 320.274 101.845   2
   1  12   3 3936.26 288.360   4
   1  12   4 7821.16 406.621   4
  -1 -12  -7 336.940 118.757   1
   1  13  -5-99.8916 90.0010   4
   1  13  -4 2731.82 267.172   4
   1  13  -3 10237.2 515.392   4
   1  13  -2 4013.83 309.980   4
   1  13  -1-63.9173 70.0533   4
   1  13   0-6.93077 77.6230   4
   1  13   1 210.052 94.9119   4
   1  13   2 534.924 125.624   4
  -2  14  -2 2014.88 212.795   4
  -2  14  -3 7012.73 394.901   4
  -2  14  -4 1507.36 189.828   4
  -2  14  -5 135.277 78.9206   4
  -2  14  -6-25.1054 65.8819   4
  -2  14  -7 197.206 108.810   4
   2 -13  -8 2288.16 255.809   1
   2 -13  -7 327.778 108.305   1
   2 -13  -6 443.073 120.587   1
   2 -13  -5 7995.05 470.651   1
   2 -13  -4 17410.4 703.269   1
   2 -13  -3 7980.14 463.585   1
   2 -13  -2 833.617 147.505   2
   2 -13  -2 782.139 157.751   1
   2 -13  -1-43.8787 80.5762   1
   2 -13  -1-16.1525 92.9189   2
  -2  13   0 1153.29 149.069   4
   2 -13   0 861.537 207.189   2
   2 -13   0 1223.39 198.433   1
   2 -13   1 7097.58 455.384   2
  -2  13  -1 7040.55 361.855   4
  -2  13  -2 34256.1 898.444   4
   2 -13   2 34159.5 981.137   2
  -2  13  -3 62445.9 1345.68   4
   2 -13   3 63259.2 1440.07   2
   2 -13   4 26812.3 862.934   2
  -2  13  -4 27461.5 809.679   4
  -2  13  -5 6941.25 392.193   4
   2 -13   5 7128.83 418.842   2
  -2  13  -6 834.543 147.320   4
  -2  13  -7 1091.17 163.385   4
  -2  13  -8 8244.25 448.066   4
  -2  13  -9 30243.3 942.444   4
   2 -12 -11 15634.8 660.392   1
   2 -12 -10 14537.9 628.500   1
   2 -12  -9 4965.61 358.247   1
   2 -12  -8 280.799 106.190   1
   2 -12  -7 5.67655 82.3127   1
   2 -12  -6 5742.77 378.428   1
   2 -12  -5 34421.3 998.603   1
   2 -12  -4 62799.0 1444.60   1
   2 -12  -3 51620.8 1275.45   1
   2 -12  -2 16678.7 650.366   1
  -2  12   2 16769.9 527.040   4
  -2  12   1 1812.36 167.808   4
   2 -12  -1 1794.02 209.868   1
   2 -12  -1 1437.14 183.110   2
   2 -12   0 86.2378 93.9059   1
  -2  12   0-19.9690 54.0007   4
   2 -12   1 9367.45 474.258   1
  -2  12  -1 8205.51 373.188   4
   2 -12   1 8908.53 443.303   2
  -2  12  -2 41961.5 978.715   4
   2 -12   2 41850.7 1067.05   2
   2 -12   3 48457.1 1172.30   2
  -2  12  -3 49415.9 1106.02   4
   2 -12   4 19250.0 674.978   2
  -2  12  -4 19662.5 636.939   4
  -2  12  -5 2230.21 208.278   4
   2 -12   5 2416.96 229.687   2
  -2  12  -6 337.544 96.4024   4
  -2  12  -7 87.1061 74.2182   4
  -2  12  -8-26.1699 67.8973   4
  -2  12  -9 4371.72 321.132   4
  -2  12 -10 2683.19 257.328   4
  -2  12 -11 206.803 91.3977   4
   2 -11 -13 1946.34 230.706   1
   2 -11 -12 9233.38 487.722   1
   2 -11 -11 37252.1 1042.61   1
   2 -11 -10 39947.9 1082.82   1
   2 -11  -9 12349.1 548.371   1
   2 -11  -8 377.925 112.404   1
   2 -11  -7 183.685 85.5684   1
   2 -11  -6 4281.07 305.825   1
   2 -11  -5 15727.8 605.372   1
   2 -11  -4 25182.7 792.448   1
  -2  11   4 26954.3 651.835   4
  -2  11   3 20208.6 548.123   4
   2 -11  -3 18926.5 665.530   1
  -2  11   2 668.518 96.8056   4
   2 -11  -2 528.416 115.253   1
   2 -11  -1 2672.75 237.980   1
  -2  11   1 2333.20 177.187   4
   2 -11   0 848.433 133.949   2
   2 -11   0 604.852 126.646   1
  -2  11   0 590.144 95.7703   4
   2 -11   1 259.543 95.9930   1
  -2  11  -1 418.665 83.3977   4
   2 -11   1 553.973 121.246   2
   2 -11   2 251.335 86.2555   2
   2 -11   2 270.858 98.8499   1
  -2  11  -2 284.651 81.7941   4
  -2  11  -3 1495.69 156.805   4
   2 -11   3 1264.38 156.520   2
   2 -11   4 320.807 89.1688   2
  -2  11  -4 389.731 92.8989   4
   2 -11   5 4670.74 306.489   2
  -2  11  -5 4979.95 293.235   4
  -2  11  -6 3113.39 240.727   4
  -2  11  -7 591.021 120.949   4
  -2  11  -8 2258.40 212.046   4
  -2  11  -9 334.329 89.9547   4
  -2  11 -10 614.355 129.357   4
  -2  11 -11 343.568 101.981   4
  -2  11 -12 2339.30 245.378   4
   2 -10 -14 195.782 100.208   1
   2 -10 -13 731.063 147.949   1
   2 -10 -12 2298.69 232.589   1
   2 -10 -11 10821.6 495.602   1
   2 -10 -10 4700.10 318.497   1
   2 -10  -9-62.5304 71.6838   1
   2 -10  -8 2451.41 226.691   1
   2 -10  -7 924.484 141.095   1
   2 -10  -6 1498.29 177.389   1
  -2  10   5 162.968 49.8017   4
   2 -10  -5 251.312 96.7158   1
  -2  10   4 1377.68 120.968   4
   2 -10  -4 1210.37 158.273   1
   2 -10  -3 413.241 107.181   1
  -2  10   3 577.027 83.4516   4
  -2  10   2 6107.19 263.705   4
   2 -10  -2 5896.87 334.988   1
   2 -10  -1 7264.55 370.351   1
  -2  10   1 6797.46 287.485   4
   2 -10   0 56.4538 73.7779   1
   2 -10   0 88.2204 64.5867   2
  -2  10   0 33.0867 42.9274   4
   2 -10   1 2398.56 210.599   1
  -2  10  -1 2539.65 179.052   4
   2 -10   1 2444.34 200.017   2
   2 -10   2 923.209 130.301   2
   2 -10   2 1186.27 155.309   1
  -2  10  -2 1073.50 123.008   4
  -2  10  -3 3262.78 211.897   4
   2 -10   3 3130.31 228.300   2
  -2  10  -4 1054.47 132.465   4
   2 -10   4 1263.11 151.742   2
   2 -10   5 2070.38 190.545   2
  -2  10  -5 1875.81 169.337   4
  -2  10  -6 95.3617 53.9744   4
  -2  10  -7 142.939 65.4203   4
  -2  10  -8 164.132 81.1741   4
  -2  10  -9 3040.72 245.123   4
  -2  10 -10 13410.8 537.114   4
  -2  10 -11 7009.18 402.604   4
  -2  10 -12 16.8382 62.4742   4
  -2  10 -13 458.008 121.198   4
  -2  10 -14-26.7248 71.7243   4
   2  -9 -15 4606.13 333.774   1
   2  -9 -14 585.321 131.528   1
   2  -9 -13 287.244 92.6770   1
   2  -9 -12 482.223 109.892   1
   2  -9 -11 21.7536 67.1559   1
   2  -9 -10-48.5265 60.2768   1
   2  -9  -9 1811.56 188.058   1
   2  -9  -8 3738.82 263.077   1
   2  -9  -7 224.164 82.2564   1
  -2   9   6 3412.57 176.443   4
   2  -9  -6 3232.75 238.256   1
   2  -9  -5 1079.89 144.451   1
  -2   9   5 1014.79 98.2374   4
  -2   9   4 7821.83 275.521   4
   2  -9  -4 7515.95 360.562   1
   2  -9  -3 5190.65 295.036   1
  -2   9   3 5506.50 227.585   4
  -2   9   2 921.087 95.5531   4
   2  -9  -2 853.608 123.550   1
   2  -9  -1 40.0933 56.2358   1
  -2   9   1 32.9025 39.1001   4
   2  -9   0 63.0861 48.3955   2
  -2   9   0 70.4315 33.3135   4
   2  -9   0 190.368 76.6978   1
  -2   9  -1 367.476 68.7031   4
   2  -9   1 251.773 71.2787   2
   2  -9   1 531.871 109.164   1
   2  -9   2 7706.86 356.184   1
  -2   9  -2 7400.78 301.899   4
   2  -9   2 7596.57 335.092   2
   2  -9   3 44217.7 998.764   1
  -2   9  -3 43697.7 901.072   4
   2  -9   3 41712.2 931.959   2
  -2   9  -4 28805.4 601.533   3
  -2   9  -4 28471.3 695.716   4
   2  -9   4 28026.5 720.890   2
  -2   9  -5 2722.56 190.846   4
   2  -9   5 2485.41 192.907   2
  -2   9  -6 1233.55 93.9251   3
  -2   9  -6 1220.62 136.869   4
  -2   9  -7 123.081 55.6527   4
  -2   9  -7 162.036 40.3775   3
  -2   9  -8 102.311 37.5962   3
  -2   9  -8 13.2850 53.3000   4
  -2   9  -9 3053.50 233.583   4
  -2   9 -10 15433.6 563.865   4
  -2   9 -11 5174.92 331.173   4
  -2   9 -12-31.9103 72.4997   4
  -2   9 -13-59.9683 89.9415   4
  -2   9 -14 129.418 92.7673   4
  -2   9 -15 1492.64 210.741   4
   2  -8 -15 928.917 157.073   1
   2  -8 -14 176.336 98.5297   1
   2  -8 -13 514.630 119.658   1
   2  -8 -12 754.324 132.442   1
   2  -8 -11 2403.51 214.085   1
   2  -8 -10 12656.7 492.649   1
   2  -8  -9 6211.09 331.645   1
   2  -8  -8 274.592 82.9613   1
   2  -8  -7 257.706 82.2962   1
   2  -8  -6 162.336 72.3185   1
   2  -8  -6 110.926 35.5176   4
  -2   8   5 3609.40 164.622   4
   2  -8  -5 3653.83 236.821   1
   2  -8  -5 3317.57 156.636   4
   2  -8  -4 26602.0 706.847   1
   2  -8  -4 27879.3 571.012   4
  -2   8   4 29431.0 577.505   4
   2  -8  -3 38861.0 737.364   4
   2  -8  -3 38849.3 889.864   1
  -2   8   3 41163.7 740.876   4
   2  -8  -2 13572.8 368.848   4
  -2   8   2 13672.7 359.867   4
   2  -8  -2 13069.5 453.760   1
   2  -8  -1 540.045 102.058   1
  -2   8   1 466.342 66.2958   4
   2  -8   0 274.775 76.9964   1
  -2   8   0 278.123 59.3187   4
   2  -8   1 2304.47 182.785   1
   2  -8   1 2409.43 173.493   2
  -2   8  -1 2386.38 150.552   4
  -2   8  -2 4747.48 218.265   4
   2  -8   2 4372.05 251.635   1
   2  -8   2 4551.36 237.762   2
  -2   8  -3 12682.9 398.432   4
   2  -8   3 13354.3 428.747   2
   2  -8   3 14145.9 465.311   1
  -2   8  -4 16220.5 468.716   4
   2  -8   4 15441.1 477.896   2
   2  -8   5 1288.94 132.661   2
  -2   8  -5 1321.59 130.235   4
  -2   8  -6 7199.86 225.864   3
  -2   8  -6 6953.93 315.342   4
  -2   8  -7 16.4215 26.9575   3
  -2   8  -7 1.91945 51.9997   4
  -2   8  -8 3667.80 241.535   4
  -2   8  -8 3310.14 154.880   3
  -2   8  -9 181.230 43.9850   3
  -2   8  -9 276.507 80.8384   4
  -2   8 -10 1700.45 177.378   4
  -2   8 -10 1794.36 119.617   3
  -2   8 -11 382.177 96.7308   4
  -2   8 -12 401.441 101.432   4
  -2   8 -13 1124.39 163.161   4
  -2   8 -14 547.540 131.896   4
  -2   8 -15 2566.44 256.405   4
  -2   8 -16 91.6369 81.3872   4
   2  -7 -16 5425.39 347.629   1
   2  -7 -15 1053.82 154.536   1
   2  -7 -14 490.870 111.665   1
   2  -7 -13 363.827 98.5431   1
   2  -7 -12-55.8138 57.7955   1
   2  -7 -11 8659.49 393.131   1
   2  -7 -10 28643.5 760.506   1
   2  -7  -9 7216.79 342.541   1
   2  -7  -8-14.2455 25.8373   4
   2  -7  -8 81.5540 68.0498   1
   2  -7  -7 155.566 36.0355   4
   2  -7  -7 129.000 68.7312   1
   2  -7  -6 147.067 61.0794   1
   2  -7  -6 134.366 31.1389   4
  -2   7   5 926.062 78.5447   4
   2  -7  -5 827.814 71.6836   4
   2  -7  -5 976.021 119.729   1
  -2   7   4 6104.93 200.819   4
   2  -7  -4 5882.27 283.697   1
   2  -7  -4 5863.93 195.896   4
   2  -7  -3 10007.0 274.554   4
   2  -7  -3 9965.79 367.684   1
  -2   7   3 10518.3 274.378   4
   2  -7  -2 302.879 50.6517   4
   2  -7  -2 242.179 69.5371   1
  -2   7   2 245.028 43.0857   4
  -2   7   1 5834.89 205.882   4
   2  -7  -1 5716.31 212.526   4
   2  -7  -1 5890.09 271.804   1
  -2   7   0 271.063 50.4221   4
   2  -7   0 208.329 45.8083   4
   2  -7   0 325.125 73.3421   1
  -2   7  -1 3870.45 177.888   3
   2  -7   1 3901.96 215.905   1
   2  -7   1 3850.71 202.467   2
  -2   7  -1 3784.59 173.441   4
   2  -7   2 5565.39 244.443   2
  -2   7  -2 5210.58 215.595   4
   2  -7   2 5520.55 260.588   1
   2  -7   3 3558.82 205.664   1
   2  -7   3 3124.37 184.174   2
  -2   7  -3 3308.99 184.506   4
  -2   7  -4 3218.21 186.911   4
   2  -7   4 3220.29 190.922   2
  -2   7  -5 194.941 57.6675   4
  -2   7  -6 642.073 65.1307   3
  -2   7  -6 658.798 96.0997   4
  -2   7  -7 2385.69 125.560   3
  -2   7  -7 2334.51 176.087   4
  -2   7  -8 3608.54 160.049   3
  -2   7  -8 3343.59 224.285   4
  -2   7  -9 352.407 58.6882   3
  -2   7  -9 403.388 88.6795   4
  -2   7 -10 19095.6 459.047   3
  -2   7 -10 18712.5 593.278   4
  -2   7 -11 31786.2 665.230   3
  -2   7 -11 29835.8 816.247   4
  -2   7 -12 6520.02 268.887   3
  -2   7 -12 6233.83 352.564   4
  -2   7 -13 678.316 126.840   4
  -2   7 -14 1182.56 165.610   4
  -2   7 -15 725.070 145.370   4
  -2   7 -16 10089.8 505.938   4
  -2   7 -17 24693.0 854.391   4
   2  -6 -17 2303.33 231.258   1
   2  -6 -16 2604.81 273.361   3
   2  -6 -16 2602.58 235.455   1
   2  -6 -15-116.516 85.4820   1
   2  -6 -15-22.4384 94.2255   3
   2  -6 -14 1155.67 187.742   3
   2  -6 -14 1330.89 161.956   1
   2  -6 -13 651.901 133.434   3
   2  -6 -13 594.950 109.430   1
   2  -6 -12 1374.11 183.500   3
   2  -6 -12 1645.56 166.773   1
   2  -6 -11 963.858 128.946   1
   2  -6 -11 826.306 142.373   3
   2  -6 -10 736.207 124.495   3
   2  -6 -10 657.377 105.692   1
   2  -6  -9 390.287 98.0086   3
   2  -6  -9 236.861 65.4977   1
   2  -6  -9 441.175 53.2148   4
   2  -6  -8 4522.68 249.857   1
   2  -6  -8 4669.47 161.695   4
   2  -6  -8 4490.20 268.575   3
   2  -6  -7 5840.55 176.352   4
   2  -6  -7 5857.33 282.732   1
   2  -6  -6 2883.45 193.170   1
   2  -6  -6 3072.34 119.712   4
   2  -6  -5 6063.47 269.184   1
   2  -6  -5 5177.44 158.244   4
   2  -6  -4 2895.78 116.690   4
  -2   6   4 3174.24 121.676   4
   2  -6  -4 3078.14 188.719   1
   2  -6  -3 8470.18 223.010   4
  -2   6   3 8939.23 224.134   4
   2  -6  -3 8566.18 320.553   1
   2  -6  -2 3107.07 129.184   4
  -2   6   2 3111.55 125.588   4
   2  -6  -2 3338.64 191.338   1
  -2   6   1-44.3733 35.3238   3
  -2   6   1 42.6666 21.8738   4
   2  -6  -1 27.4481 25.7249   4
   2  -6  -1 80.4317 52.9045   1
  -2   6   0 254.461 44.7311   3
  -2   6   0 212.066 34.6210   4
   2  -6   0 191.036 40.9144   4
   2  -6   0 200.337 62.1006   1
   2  -6   1 996.601 94.7913   2
   2  -6   1 1230.84 115.416   1
  -2   6  -1 772.765 70.4741   4
  -2   6  -2 1780.75 114.975   4
   2  -6   2 1789.63 137.714   1
   2  -6   2 1554.01 118.244   2
  -2   6  -3 76543.0 1262.75   4
   2  -6   3 80928.1 1328.67   1
   2  -6   3 75797.3 1279.24   2
  -2   6  -4 124807. 1909.55   4
   2  -6   4 129288. 1953.29   1
   2  -6   4 120556. 1917.82   2
  -2   6  -5 55429.3 1017.43   4
  -2   6  -5 55421.9 893.996   3
  -2   6  -6 4963.95 240.087   4
  -2   6  -6 5625.58 187.659   3
  -2   6  -7 88.4866 36.0632   3
  -2   6  -7 91.4859 58.5432   4
  -2   6  -8 5009.52 259.537   4
  -2   6  -8 4853.75 191.005   3
  -2   6  -9 21986.3 613.956   4
  -2   6  -9 21931.8 490.308   3
  -2   6 -10 95839.8 1523.80   3
  -2   6 -10 94680.0 1706.57   4
  -2   6 -11 110705. 1745.73   3
  -2   6 -11 106794. 1923.31   4
  -2   6 -12 39836.1 829.092   3
  -2   6 -12 37674.4 947.580   4
  -2   6 -13 6807.16 306.643   3
  -2   6 -13 6867.60 370.103   4
  -2   6 -14 583.867 113.309   3
  -2   6 -14 524.264 118.856   4
  -2   6 -15 738.443 136.484   4
  -2   6 -16 9372.87 482.316   4
  -2   6 -17 24786.5 846.941   4
  -2   6 -18 20715.7 781.915   4
   2  -5 -18 31.6246 76.1522   1
   2  -5 -17 450.928 135.453   3
   2  -5 -17 577.101 122.604   1
   2  -5 -16 152.478 95.6136   3
   2  -5 -16 37.9602 68.3176   1
   2  -5 -15 1494.94 168.186   1
   2  -5 -15 1352.92 197.698   3
   2  -5 -14 2014.08 191.703   1
   2  -5 -14 1828.95 218.243   3
   2  -5 -13 58.6069 57.1377   1
   2  -5 -13-46.9725 86.5508   3
   2  -5 -12 48.6209 69.4600   3
   2  -5 -12 226.028 81.7390   1
   2  -5 -11 974.606 122.524   1
   2  -5 -11 913.428 137.448   3
   2  -5 -10 11259.0 451.420   3
   2  -5 -10 11937.8 311.147   4
   2  -5 -10 12008.2 425.919   1
   2  -5  -9 19089.1 543.070   1
   2  -5  -9 18303.7 575.455   3
   2  -5  -9 19303.0 401.947   4
   2  -5  -8 1094.99 119.243   1
   2  -5  -8 1059.15 130.937   3
   2  -5  -8 1133.81 74.4429   4
   2  -5  -7 222.199 62.4429   1
   2  -5  -7 177.047 63.5419   3
   2  -5  -7 161.971 29.3019   4
   2  -5  -6 176.062 28.1120   4
   2  -5  -6 164.075 51.9013   1
   2  -5  -5 11642.6 371.676   1
   2  -5  -5 11896.1 239.325   4
   2  -5  -4 94716.7 1325.12   4
  -2   5   4 93758.0 1338.80   4
   2  -5  -4 98880.3 1552.82   1
   2  -5  -3 206998. 2995.81   1
  -2   5   3 207452. 2790.77   4
   2  -5  -3 207373. 2792.96   4
  -2   5   2 173348. 2481.10   1
  -2   5   2 167782. 2438.88   3
   2  -5  -2 165726. 2471.51   1
  -2   5   2 168949. 2292.03   4
   2  -5  -2 166061. 2296.84   4
   2  -5  -1 43116.7 696.348   4
   2  -5  -1 42871.7 812.711   1
  -2   5   1 44079.4 821.406   1
  -2   5   1 43028.5 688.752   4
  -2   5   1 44923.8 774.568   3
  -2   5   0 4174.60 149.771   4
  -2   5   0 4564.99 200.534   1
   2  -5   0 4418.88 195.677   1
  -2   5  -1 324.490 60.2623   1
  -2   5  -1 332.820 45.2495   4
   2  -5   1 222.789 48.5860   2
   2  -5   1 262.765 61.6630   1
   2  -5   2 39191.5 712.523   2
  -2   5  -2 39494.4 692.056   4
  -2   5  -2 38604.6 744.079   1
   2  -5   2 37735.2 733.019   1
  -2   5  -3 243804. 3449.55   4
   2  -5   3 246724. 3464.25   2
   2  -5   3 244803. 3480.31   1
  -2   5  -3 249816. 3486.78   1
  -2   5  -3 252705. 3462.71   2
  -2   5  -4 272339. 3799.58   1
  -2   5  -4 269262. 3783.92   4
  -2   5  -5 169681. 2438.44   4
  -2   5  -5 162067. 2309.37   3
  -2   5  -6 27782.0 626.407   4
  -2   5  -6 28231.9 533.080   3
  -2   5  -7 392.099 54.6979   3
  -2   5  -7 362.289 73.1804   4
  -2   5  -8 254.766 52.1687   3
  -2   5  -8 189.202 66.1825   4
  -2   5  -9 10728.6 391.785   4
  -2   5  -9 10963.1 323.653   3
  -2   5 -10 56958.6 1012.37   3
  -2   5 -10 55067.3 1128.58   4
  -2   5 -11 35108.5 860.932   4
  -2   5 -11 38407.1 789.575   3
  -2   5 -12 17754.3 577.049   4
  -2   5 -12 17466.8 505.719   3
  -2   5 -13 592.599 96.9783   3
  -2   5 -13 443.392 98.7379   4
  -2   5 -14 165.187 82.0236   3
  -2   5 -14 221.508 91.1662   4
  -2   5 -15 4009.25 294.271   4
  -2   5 -15 3640.94 251.899   3
  -2   5 -16 802.200 134.125   3
  -2   5 -16 727.328 143.156   4
  -2   5 -17 2259.15 244.615   4
  -2   5 -18 1254.92 191.912   4
   2  -4 -18 665.972 154.845   3
   2  -4 -18 1061.83 162.712   1
   2  -4 -17 11041.1 484.204   1
   2  -4 -17 10329.5 524.766   3
   2  -4 -16 16524.8 584.741   1
   2  -4 -16 14867.9 616.486   3
   2  -4 -15 4221.93 276.008   1
   2  -4 -15 3515.46 294.698   3
   2  -4 -14 752.757 137.755   3
   2  -4 -14 896.663 129.515   1
   2  -4 -13-57.1775 89.1745   3
   2  -4 -13 206.773 68.7775   1
   2  -4 -12 2906.04 238.430   3
   2  -4 -12 3051.39 214.610   1
   2  -4 -11 30496.2 814.448   3
   2  -4 -11 31986.4 758.156   1
   2  -4 -10 134763. 2232.55   3
   2  -4 -10 134868. 2157.44   1
   2  -4  -9 137777. 2145.84   1
   2  -4  -9 136293. 1950.90   4
   2  -4  -9 131853. 2203.48   3
   2  -4  -8 36227.3 622.722   4
   2  -4  -8 36883.2 779.484   1
   2  -4  -8 37290.3 819.955   3
   2  -4  -7 8387.59 206.162   4
   2  -4  -7 8413.28 330.269   3
   2  -4  -7 8859.53 316.973   1
   2  -4  -6 510.211 87.3148   1
   2  -4  -6 465.222 83.1361   3
   2  -4  -6 455.201 39.9797   4
   2  -4  -5 22606.9 531.467   1
   2  -4  -5 23333.6 371.220   4
   2  -4  -4 124561. 1690.47   4
  -2   4   4 130154. 1926.78   1
  -2   4   4 130941. 1920.55   3
   2  -4  -4 126682. 1912.01   1
  -2   4   3 259354. 3643.87   1
  -2   4   3 260796. 3434.74   4
   2  -4  -3 257548. 3432.20   4
   2  -4  -3 266866. 3648.44   1
  -2   4   3 270297. 3628.77   3
   2  -4  -2 208913. 2999.49   1
  -2   4   2 215244. 2821.96   4
   2  -4  -2 208838. 2827.03   4
  -2   4   2 216573. 2974.22   3
  -2   4   2 214644. 3009.20   1
  -2   4   1 14027.3 265.276   4
   2  -4  -1 14123.1 357.547   1
  -2   4   1 14880.1 364.489   1
  -2   4   0 10119.0 283.784   1
   2  -4   0 9438.85 273.274   1
  -2   4   0 9534.09 217.927   4
   2  -4   1 3367.47 138.486   2
  -2   4  -1 3542.08 130.577   4
  -2   4  -1 3388.68 156.334   1
   2  -4   1 3373.79 151.945   1
   2  -4   2 6953.77 210.849   2
  -2   4  -2 7221.19 213.446   2
  -2   4  -2 6661.48 205.072   4
  -2   4  -2 7039.89 228.742   1
   2  -4   2 7155.65 227.452   1
   2  -4   3 42374.1 742.432   1
  -2   4  -3 42780.0 751.683   1
  -2   4  -3 41999.9 739.137   2
  -2   4  -4 79460.5 1211.11   2
  -2   4  -4 74320.9 1141.51   3
  -2   4  -4 74722.6 1199.91   1
  -2   4  -5 33638.5 639.306   1
  -2   4  -5 33327.4 589.798   3
  -2   4  -5 31731.6 640.750   2
  -2   4  -6 3175.89 161.395   1
  -2   4  -6 3016.72 137.574   3
  -2   4  -7 3464.22 170.804   1
  -2   4  -7 3396.33 155.599   3
   2  -4   8 12749.8 338.090   3
  -2   4  -8 13722.6 358.044   3
  -2   4  -9 7154.19 261.438   3
  -2   4 -10 576.279 84.8651   3
  -2   4 -11 3930.03 217.070   3
  -2   4 -12-12.2914 51.1343   3
  -2   4 -13 2450.96 195.752   3
  -2   4 -14-2.04748 66.0639   3
  -2   4 -15 3680.73 256.088   3
  -2   4 -15 3539.24 268.398   4
  -2   4 -16 1547.44 175.755   3
  -2   4 -16 1509.03 183.491   4
  -2   4 -17 216.621 88.6911   3
  -2   4 -17 205.143 100.280   4
  -2   4 -18 465.540 128.209   4
  -2   4 -19-32.2363 86.2148   4
   2  -3 -19 799.862 161.464   3
   2  -3 -19 597.121 134.573   1
   2  -3 -18 7412.41 403.892   1
   2  -3 -18 6858.59 422.134   3
   2  -3 -17 34062.8 915.699   1
   2  -3 -17 32000.5 953.938   3
   2  -3 -16 42946.2 1024.22   1
   2  -3 -16 38112.4 1046.66   3
   2  -3 -15 23136.1 682.439   1
   2  -3 -15 20677.4 701.864   3
   2  -3 -15 21361.2 576.497   4
   2  -3 -14 2384.93 225.280   3
   2  -3 -14 2647.00 210.162   1
   2  -3 -14 2591.61 173.003   4
   2  -3 -13 772.975 129.035   3
   2  -3 -13 836.397 121.460   1
   2  -3 -12 1361.03 146.326   1
   2  -3 -12 915.007 138.481   3
   2  -3 -11 33778.7 766.207   1
   2  -3 -11 30871.8 791.986   3
   2  -3 -10 85347.1 1588.56   3
   2  -3 -10 94833.8 1558.71   1
   2  -3  -9 72346.1 1313.33   3
   2  -3  -9 71206.0 1269.34   1
   2  -3  -8 24206.6 572.567   1
   2  -3  -8 22765.3 593.461   3
   2  -3  -7 925.482 100.351   3
   2  -3  -7 392.971 64.1368   1
  -2   3   6 2131.82 139.218   1
   2  -3  -6 2096.48 141.640   1
   2  -3  -6 1891.91 136.632   3
  -2   3   5 3214.63 165.912   1
   2  -3  -5 3337.63 167.284   1
  -2   3   5 3470.99 172.817   3
  -2   3   4 5710.22 210.688   3
  -2   3   4 5829.48 215.530   1
   2  -3  -4 5540.35 209.086   1
  -2   3   3 36957.7 683.966   1
   2  -3  -3 36223.2 678.476   1
  -2   3   3 39068.3 674.962   3
   2  -3  -2 6927.24 218.194   1
  -2   3   2 6955.63 220.790   1
  -2   3   1 784.969 76.6029   1
   2  -3  -1 804.947 72.7721   1
  -2   3   1 735.809 39.1346   4
  -2   3   0 169.837 47.3681   1
   2  -3   0 117.225 40.8684   1
   2  -3   1 355.460 43.8188   2
   2  -3   1 327.470 50.3791   1
  -2   3  -1 306.777 49.8259   1
  -2   3  -2 37495.0 596.249   2
   2  -3   2 34578.9 594.169   1
  -2   3  -2 33544.8 599.491   1
  -2   3  -3 10573.7 256.074   1
   2  -3   3 10360.0 249.747   1
  -2   3  -3 10373.9 260.282   2
  -2   3  -4 5437.97 182.531   1
  -2   3  -4 5246.24 173.829   3
  -2   3  -5 78.9565 29.3023   3
  -2   3  -5 9.15944 26.4077   1
  -2   3  -6 6309.82 204.693   3
   2  -3   6 5786.27 196.981   3
  -2   3  -6 4275.90 204.722   1
  -2   3  -7 1138.00 93.5244   3
   2  -3   7 1143.48 91.6355   3
   2  -3   8 182.655 42.7145   3
  -2   3  -8 259.971 55.2889   3
  -2   3  -9 5837.35 243.185   3
  -2   3 -10 934.474 106.227   3
  -2   3 -11 11821.0 406.352   3
  -2   3 -12 6259.84 304.301   3
  -2   3 -13 640.592 113.314   3
  -2   3 -14 856.295 132.263   3
  -2   3 -15-8.01282 62.9449   3
  -2   3 -16 1476.52 179.723   3
  -2   3 -17 5105.49 334.094   3
  -2   3 -18 9577.02 475.624   3
  -2   3 -18 9518.83 484.897   4
  -2   3 -19 1300.89 192.834   3
  -2   3 -19 1219.50 183.002   4
   2  -2 -19 103.091 90.9828   1
   2  -2 -19 38.3030 81.1324   3
   2  -2 -18 5633.25 350.481   1
   2  -2 -18 4539.30 345.208   3
   2  -2 -17 9213.25 437.441   1
   2  -2 -17 8409.38 447.182   3
   2  -2 -16 14903.5 493.286   4
   2  -2 -16 15064.4 550.762   1
   2  -2 -16 14061.9 564.881   3
   2  -2 -15 5376.55 312.429   1
   2  -2 -15 4933.15 325.849   3
   2  -2 -15 5400.57 277.906   4
   2  -2 -14 1081.74 143.540   3
   2  -2 -14 780.577 104.085   4
   2  -2 -14 1023.45 135.753   1
   2  -2 -13 89.9746 56.6742   1
   2  -2 -13-41.1917 69.0870   3
   2  -2 -13 167.581 53.4783   4
   2  -2 -12 1813.01 134.570   4
   2  -2 -12 2152.19 173.270   1
   2  -2 -12 1766.15 165.042   3
   2  -2 -11 21.7399 52.2579   3
   2  -2 -11-2.98103 53.3267   1
   2  -2 -11 39.0820 31.9196   4
   2  -2 -10 193.218 61.5635   1
   2  -2 -10 115.097 60.8068   3
   2  -2  -9 3085.19 189.625   1
   2  -2  -9 2659.80 188.204   3
   2  -2  -8 3427.93 187.737   3
   2  -2  -8 2961.82 175.822   1
   2  -2  -7 5118.30 221.253   3
   2  -2  -7 5186.35 219.798   1
  -2   2   7 5020.61 226.129   3
   2  -2  -6 856.221 93.0900   1
   2  -2  -6 936.208 93.7676   3
   2  -2  -6 874.876 59.6406   4
  -2   2   6 1113.64 102.486   3
   2  -2  -5 22218.2 479.767   1
   2  -2  -5 21475.0 366.520   4
  -2   2   5 22612.3 477.527   3
  -2   2   4 7339.88 232.759   1
   2  -2  -4 7152.42 139.801   4
  -2   2   4 7131.70 219.292   3
   2  -2  -4 7432.36 233.666   1
   2  -2  -3 3693.71 152.075   1
  -2   2   3 4025.14 158.995   1
  -2   2   3 3975.04 146.019   3
  -2   2   2 8201.85 228.433   1
   2  -2  -2 9052.13 233.317   1
   2  -2  -1 328.065 49.7139   1
  -2   2   1 266.068 47.2202   1
   2  -2   0 1162.36 70.4855   1
  -2   2   0 1165.92 71.0459   1
   2  -2   0 1112.72 49.8931   2
  -2   2  -1 331.605 33.5379   2
  -2   2  -1 262.732 31.2856   1
   2  -2   1 333.474 39.3823   1
  -2   2  -2 28085.1 458.924   1
   2  -2   2 27556.8 451.352   1
   2  -2   3 20320.6 366.924   1
  -2   2  -3 21542.9 370.060   1
  -2   2  -3 21907.6 399.065   3
  -2   2  -4 56396.4 868.219   1
   2  -2   4 59581.7 914.201   3
  -2   2  -4 58951.4 916.658   3
   2  -2   5 35422.7 597.385   3
  -2   2  -5 36566.1 608.989   3
  -2   2  -6 1842.83 116.438   3
   2  -2   6 1707.49 110.857   3
  -2   2  -7 9314.96 294.128   3
   2  -2   7 9636.95 291.061   3
  -2   2  -8 1814.08 132.750   3
  -2   2  -9 427.988 81.0076   3
  -2   2 -10 19102.3 528.428   3
  -2   2 -11 38587.7 862.622   3
  -2   2 -12 7081.23 338.264   3
  -2   2 -13 188.652 85.8118   3
  -2   2 -14 756.889 127.543   3
  -2   2 -15 1099.56 153.202   3
  -2   2 -16 331.002 81.9519   1
  -2   2 -16 353.706 107.412   3
  -2   2 -17 2774.13 256.126   3
  -2   2 -18 4119.12 318.919   3
  -2   2 -19 96.9709 95.3936   3
  -2   2 -20 349.899 124.250   3
  -2   2 -20 84.4284 73.9120   4
   2  -1 -20 781.210 153.119   1
   2  -1 -19 28.1671 78.2790   3
   2  -1 -19-20.7642 88.2577   1
   2  -1 -18 1687.78 202.339   1
   2  -1 -18 1589.72 211.157   3
   2  -1 -17 143.022 66.3540   4
   2  -1 -17-39.5105 83.6767   1
   2  -1 -17-108.672 92.4476   3
   2  -1 -16 821.433 135.187   3
   2  -1 -16 676.782 121.073   1
   2  -1 -16 733.860 113.103   4
   2  -1 -15 867.885 134.703   3
   2  -1 -15 634.145 120.857   1
   2  -1 -15 699.502 107.391   4
   2  -1 -14 2474.85 181.651   4
   2  -1 -14 2397.57 199.285   1
   2  -1 -14 2210.26 205.144   3
   2  -1 -13 544.018 101.648   1
   2  -1 -13 298.022 81.3871   3
   2  -1 -13 459.747 81.4672   4
   2  -1 -12 3118.66 185.249   4
   2  -1 -12 2909.16 212.724   3
   2  -1 -12 2992.75 208.600   1
   2  -1 -11 6479.58 287.043   1
   2  -1 -11 5858.34 276.723   3
   2  -1 -11 6489.33 260.045   4
   2  -1 -10 557.840 76.0106   4
   2  -1 -10 340.186 66.3366   3
   2  -1 -10 365.050 79.4592   1
   2  -1  -9 15115.2 439.958   1
   2  -1  -9 15532.7 431.858   3
   2  -1  -9 15750.7 391.556   4
   2  -1  -8 220.713 64.2723   1
   2  -1  -8 279.625 60.2498   3
  -2   1   8 340.702 69.5123   3
   2  -1  -8 283.169 51.7045   4
   2  -1  -7 3628.15 146.948   4
   2  -1  -7 3704.09 172.264   3
  -2   1   7 3790.80 183.242   3
   2  -1  -6 119.598 43.1162   3
  -2   1   6 108.945 47.7139   3
   2  -1  -6 126.920 32.6723   4
   2  -1  -5 1065.26 64.8146   4
  -2   1   5 1132.13 86.0945   3
  -2   1   4 10703.0 259.918   3
   2  -1  -4 11073.4 221.374   4
   2  -1  -3 48860.0 804.426   1
   2  -1  -3 49605.9 719.694   4
  -2   1   3 50680.5 719.588   4
   2  -1  -2 59570.2 907.563   1
  -2   1   2 59529.5 835.141   4
   2  -1  -2 60106.1 839.887   4
   2  -1  -1 9030.73 180.010   4
   2  -1  -1 9099.63 206.937   1
  -2   1   1 9331.33 179.237   4
   2  -1   0 20305.4 337.933   1
  -2   1   0 19547.7 339.666   4
  -2   1   0 19931.7 334.339   1
  -2   1  -1 299.038 28.8647   1
   2  -1   1 354.477 30.5521   1
   2  -1   2 3315.48 118.282   3
  -2   1  -2 3446.10 123.942   3
   2  -1   3 70728.5 1075.19   3
  -2   1  -3 73010.2 1080.30   3
  -2   1  -3 71385.8 974.102   1
  -2   1  -4 81030.7 1214.51   3
   2  -1   4 78772.0 1211.34   3
  -2   1  -5 70430.4 1130.38   3
   2  -1   5 72575.0 1136.11   3
  -2   1  -6 191.798 58.2677   3
   2  -1   6 93.5186 41.1739   3
  -2   1  -7 9259.80 305.709   3
   2  -1   7 9309.50 302.837   3
  -2   1  -8-29.0901 58.0156   3
  -2   1  -9 3169.66 197.502   3
  -2   1 -10 385.799 83.5819   3
  -2   1 -11 3477.11 239.865   3
  -2   1 -12 1752.87 176.008   3
  -2   1 -13 735.329 135.348   3
  -2   1 -13 686.837 89.6751   1
  -2   1 -14 1283.37 174.288   3
  -2   1 -14 1524.37 132.558   1
  -2   1 -15 3007.66 192.348   1
  -2   1 -15 2919.22 253.413   3
  -2   1 -16 6057.51 363.516   3
  -2   1 -17 356.721 109.438   3
  -2   1 -18 260.679 123.332   3
  -2   1 -19 553.068 140.076   3
  -2   1 -20 99.4286 79.5356   3
   2   0 -20 271.090 102.852   1
   2   0 -19 144.483 89.2246   1
   2   0 -18 1929.20 214.818   1
   2   0 -18 1504.27 188.126   3
   2   0 -18 1826.83 188.415   4
   2   0 -17 583.015 110.130   4
   2   0 -17 802.303 137.599   1
   2   0 -17 556.004 119.221   3
   2   0 -16 5121.47 311.203   1
   2   0 -16 4574.53 276.786   4
   2   0 -16 4606.32 294.524   3
   2   0 -15 2362.72 190.942   4
   2   0 -15 2375.73 209.958   1
   2   0 -15 2021.31 185.040   3
   2   0 -14-26.9652 76.0174   3
   2   0 -14 148.108 58.6772   4
   2   0 -14 129.588 71.3468   1
   2   0 -13 478.127 82.9027   3
   2   0 -13 684.923 97.8423   4
   2   0 -12 15.1266 48.6540   3
   2   0 -12 63.3637 40.0559   4
   2   0 -11 1608.52 130.607   4
   2   0 -11 1207.03 126.897   3
   2   0 -10 22393.3 530.753   4
   2   0 -10 22051.0 536.826   3
  -2   0   9 54578.0 1023.35   3
   2   0  -9 55862.9 983.310   3
   2   0  -9 55446.7 973.933   4
  -2   0   8 19407.8 477.063   3
   2   0  -8 19726.4 445.817   4
   2   0  -8 18937.1 449.210   3
  -2   0   7 513.096 70.2994   3
   2   0  -7 463.260 61.8249   3
   2   0  -7 522.470 64.1428   4
  -2   0   6 111.349 40.3904   3
   2   0  -6 193.903 44.3410   4
   2   0  -5 1178.21 77.5648   4
  -2   0   5 1284.22 79.9633   4
  -2   0   5 1074.85 77.5203   3
  -2   0   4 5394.47 159.737   4
   2   0  -4 5155.06 156.311   4
  -2   0   4 5276.44 150.539   3
   2   0  -3 34801.0 563.897   4
  -2   0   3 34717.7 559.013   4
   2   0  -2 70171.5 1014.71   4
  -2   0   2 69777.3 1012.76   4
   2   0  -1 405.432 44.9742   4
  -2   0   1 372.107 42.2299   4
  -2   0   1 409.992 25.4408   2
   2   0   0 1314.70 74.3317   4
  -2   0   0 1241.62 62.5863   3
  -2   0   0 1394.82 74.3473   4
   2   0   1 502.294 45.0118   3
   2   0   1 498.407 56.3108   4
  -2   0  -1 506.970 49.1056   3
  -2   0  -1 469.793 50.8587   4
  -2   0  -2 4574.11 148.411   3
   2   0   2 4572.23 148.252   3
  -2   0  -2 4493.00 155.013   4
   2   0   3 28642.0 527.874   3
  -2   0  -3 28992.6 526.904   3
  -2   0  -4 2073.81 121.085   3
   2   0   4 2110.97 119.458   3
  -2   0  -5 1875.41 122.155   3
  -2   0  -5 1818.62 64.9670   1
   2   0   5 1886.92 121.093   3
   2   0   6 2716.73 153.054   3
  -2   0  -6 2411.78 89.1692   1
  -2   0  -6 2513.93 151.724   3
  -2   0  -7 223.419 36.2382   1
  -2   0  -7 127.258 54.8250   3
  -2   0  -8 6024.82 180.056   1
  -2   0  -8 5849.45 269.376   3
  -2   0  -9 21375.3 431.938   1
  -2   0  -9 21094.3 579.521   3
  -2   0 -10 6337.90 212.887   1
  -2   0 -10 6257.47 313.264   3
  -2   0 -11 727.655 78.2623   1
  -2   0 -11 1332.76 157.684   3
  -2   0 -12 15527.0 404.018   1
  -2   0 -12 14679.6 536.819   3
  -2   0 -13 1075.55 150.344   3
  -2   0 -13 911.778 97.9749   1
  -2   0 -14 534.521 79.5317   1
  -2   0 -14 363.067 103.110   3
  -2   0 -15 4112.52 220.036   1
  -2   0 -15 3640.20 280.468   3
  -2   0 -16 1090.26 164.580   3
  -2   0 -17 869.034 163.421   3
  -2   0 -18 11345.3 549.397   3
  -2   0 -19 11134.7 556.862   3
   2   1 -20 92.6408 96.4993   1
   2   1 -19 158.290 97.8961   1
   2   1 -19 91.6688 70.1381   4
   2   1 -18 26.3546 61.9720   4
   2   1 -18 144.983 94.4421   1
   2   1 -17 1953.48 214.897   1
   2   1 -17 1984.04 197.599   4
   2   1 -17 1701.60 180.978   3
   2   1 -16 8554.27 395.669   4
   2   1 -16 8410.85 383.579   3
   2   1 -15 7326.04 349.129   4
   2   1 -15 7150.57 335.494   3
   2   1 -14 22.1422 52.7699   3
   2   1 -14 172.187 64.2844   4
   2   1 -13 437.746 81.1593   3
   2   1 -13 486.451 87.1519   4
   2   1 -12 3265.40 203.897   4
   2   1 -12 2972.18 189.053   3
   2   1 -11 485.802 77.1045   3
   2   1 -11 622.335 89.9170   4
  -2  -1  10 3450.61 184.829   3
   2   1 -10 3129.34 168.272   3
   2   1 -10 3378.70 188.808   4
  -2  -1   9 5833.74 229.609   3
   2   1  -9 6271.50 248.237   4
   2   1  -9 5643.25 218.140   3
   2   1  -8 1020.17 99.5527   4
   2   1  -8 953.949 81.4934   3
  -2  -1   8 995.332 89.4812   3
  -2  -1   7 6182.48 209.482   3
   2   1  -7 5972.79 224.734   4
   2   1  -6 3283.47 152.035   4
  -2  -1   6 3360.14 153.018   4
  -2  -1   6 3414.82 135.954   3
  -2  -1   5 21416.2 447.247   4
   2   1  -5 21673.8 443.680   4
  -2  -1   5 21423.3 387.114   3
  -2  -1   4 36785.4 629.265   4
   2   1  -4 34607.3 620.367   4
  -2  -1   4 35545.4 543.450   3
   2   1  -3 3031.34 129.947   4
   2   1  -3 3115.67 115.283   2
  -2  -1   3 3078.65 126.335   4
  -2  -1   2 10125.3 212.124   2
  -2  -1   2 9900.20 241.955   4
   2   1  -2 9345.93 209.830   2
   2   1  -2 9649.99 240.432   4
  -2  -1   1 2044.29 74.4100   3
   2   1  -1 2037.62 102.602   4
  -2  -1   1 1942.58 77.5900   2
  -2  -1   1 2213.81 101.434   4
  -2  -1   0 303.628 46.6412   4
   2   1   0 236.441 51.9265   4
  -2  -1   0 212.072 33.9370   3
   2   1   0 242.561 34.2386   3
  -2  -1  -1 2140.67 108.461   4
  -2  -1  -1 2112.14 96.6598   3
   2   1   1 2332.88 116.112   4
   2   1   1 2207.79 95.5841   3
  -2  -1  -2 46519.8 780.076   3
   2   1   2 48967.4 787.010   3
  -2  -1  -2 48926.6 799.231   4
   2   1   2 48077.6 692.857   1
   2   1   2 48812.4 803.152   4
   2   1   3 11577.6 296.813   3
   2   1   3 10951.1 201.570   1
  -2  -1  -3 11296.6 293.756   3
  -2  -1  -3 10867.6 291.837   4
  -2  -1  -3 10869.0 202.562   1
  -2  -1  -4 14248.1 368.443   3
   2   1   4 14739.3 370.941   3
  -2  -1  -4 14251.1 353.233   4
  -2  -1  -4 14528.9 249.565   1
   2   1   4 13774.5 250.633   1
  -2  -1  -5 42865.4 776.297   4
  -2  -1  -5 42571.8 806.048   3
   2   1   5 42686.8 800.776   3
  -2  -1  -5 41779.3 634.398   1
  -2  -1  -6 11133.6 358.009   3
  -2  -1  -6 10806.2 232.543   1
  -2  -1  -7 192.131 71.3129   3
  -2  -1  -7 69.7707 27.7377   1
  -2  -1  -8 2696.54 192.675   3
  -2  -1  -8 2688.05 119.048   1
  -2  -1  -9 3242.57 224.583   3
  -2  -1  -9 3272.42 139.234   1
  -2  -1 -10 6744.19 332.934   3
  -2  -1 -10 6760.00 221.002   1
  -2  -1 -11 57281.1 968.881   1
  -2  -1 -11 56526.9 1199.65   3
  -2  -1 -12 60370.8 1295.39   3
  -2  -1 -12 62535.3 1060.36   1
  -2  -1 -13 18363.0 463.585   1
  -2  -1 -13 18116.0 627.224   3
  -2  -1 -14 3918.77 199.778   1
  -2  -1 -14 3418.06 270.972   3
  -2  -1 -15 108.192 100.369   3
  -2  -1 -16 1042.76 169.942   3
  -2  -1 -17 12630.9 578.128   3
  -2  -1 -18 32056.3 998.634   3
  -2  -1 -19 20465.4 791.654   3
   2   2 -20 60.3712 69.2184   4
   2   2 -20 356.999 128.477   1
   2   2 -19 14.5697 62.8505   4
   2   2 -18 531.786 119.538   4
   2   2 -17 600.042 130.152   4
   2   2 -16 685.222 111.587   3
   2   2 -16 832.580 133.819   4
   2   2 -15 41.7353 46.4317   3
   2   2 -15-20.7173 71.8182   4
   2   2 -14 1310.78 147.888   4
   2   2 -14 1292.07 130.071   3
   2   2 -13 1959.66 174.850   4
   2   2 -13 2181.32 158.652   3
   2   2 -12 1633.46 154.030   4
   2   2 -12 1774.98 135.225   3
  -2  -2  11 11412.1 340.501   3
   2   2 -11 11445.2 402.372   4
   2   2 -11 11576.7 337.127   3
  -2  -2  10 3949.21 175.730   3
   2   2 -10 4070.84 223.145   4
   2   2 -10 3957.35 171.966   3
  -2  -2   9 1972.34 113.576   3
   2   2  -9 2109.86 153.153   4
  -2  -2   8 1703.64 98.5857   3
   2   2  -8 1827.80 133.911   4
   2   2  -7 833.371 94.3623   4
  -2  -2   7 1025.14 68.7616   3
  -2  -2   6 154.136 44.4827   4
  -2  -2   6 102.435 24.9244   3
   2   2  -6 120.914 45.3092   4
  -2  -2   5 7267.41 158.293   3
  -2  -2   5 7390.49 243.870   4
   2   2  -5 7667.22 236.789   2
   2   2  -5 7422.01 244.054   4
   2   2  -4 471.852 64.2023   4
  -2  -2   4 456.424 63.3855   4
   2   2  -4 405.189 52.8571   2
  -2  -2   3 10148.9 276.727   4
   2   2  -3 9781.11 274.533   4
   2   2  -3 10415.2 257.554   2
  -2  -2   3 10100.0 252.810   2
  -2  -2   2 96462.4 1432.02   4
  -2  -2   2 94843.6 1300.85   3
  -2  -2   2 96356.3 1385.47   2
   2   2  -2 95816.8 1430.86   4
  -2  -2   1 59016.2 859.688   3
   2   2  -1 58143.8 847.499   3
   2   2  -1 60107.7 953.085   4
  -2  -2   1 59968.6 956.364   4
  -2  -2   0 2536.89 126.055   4
  -2  -2   0 2702.18 108.294   3
   2   2   0 2673.35 102.822   3
   2   2   0 2489.88 129.503   4
   2   2   0 2566.02 113.650   1
  -2  -2  -1 6848.19 204.131   3
   2   2   1 6371.34 182.347   1
   2   2   1 6579.77 215.995   4
  -2  -2  -1 6632.75 216.066   4
   2   2   1 6690.55 194.806   3
  -2  -2  -2 1673.41 109.811   3
   2   2   2 1673.17 103.860   3
  -2  -2  -2 1797.57 110.749   4
   2   2   2 1799.68 114.441   4
   2   2   2 1740.58 83.8466   1
  -2  -2  -3 35999.5 675.295   4
   2   2   3 34408.8 675.129   3
  -2  -2  -3 35674.6 586.586   1
   2   2   3 37693.5 682.079   4
  -2  -2  -3 36839.7 691.443   3
   2   2   3 36065.2 581.443   1
  -2  -2  -4 172826. 2557.84   3
   2   2   4 177188. 2549.52   3
  -2  -2  -4 172509. 2516.51   4
   2   2   4 172821. 2389.64   1
  -2  -2  -4 176868. 2387.54   1
  -2  -2  -5 252944. 3645.36   3
   2   2   5 252270. 3436.35   1
  -2  -2  -5 262454. 3576.77   4
  -2  -2  -5 253751. 3430.31   1
  -2  -2  -6 131422. 2070.36   3
   2   2   6 128411. 1837.65   1
  -2  -2  -6 130138. 1835.09   1
  -2  -2  -6 132212. 1980.76   4
  -2  -2  -7 25000.1 637.093   3
  -2  -2  -7 23128.5 448.943   1
  -2  -2  -8 1144.53 142.261   3
  -2  -2  -8 1292.73 89.2777   1
  -2  -2  -9 366.939 53.2360   1
  -2  -2  -9 368.333 98.1695   3
  -2  -2 -10 30020.2 593.823   1
  -2  -2 -10 30999.5 796.356   3
  -2  -2 -11 76426.1 1231.91   1
  -2  -2 -11 73640.3 1489.39   3
  -2  -2 -12 62879.1 1083.32   1
  -2  -2 -12 62725.1 1337.92   3
  -2  -2 -13 30890.1 657.009   1
  -2  -2 -13 29258.0 856.408   3
  -2  -2 -14 2410.76 158.249   1
  -2  -2 -14 2356.77 232.451   3
  -2  -2 -15 440.711 129.573   3
  -2  -2 -16 728.680 158.931   3
  -2  -2 -17 497.848 147.443   3
  -2  -2 -18 5490.69 400.164   3
   2   3 -20 948.738 167.785   4
   2   3 -19-4.92240 75.0226   4
   2   3 -18 3301.68 280.911   4
   2   3 -17 554.840 121.928   4
   2   3 -16 2178.00 211.917   4
   2   3 -15 1559.53 175.405   4
   2   3 -14 502.541 104.263   4
   2   3 -13 39.4199 68.4076   4
   2   3 -12 62.9939 49.9412   4
   2   3 -11 92.4645 54.2290   4
  -2  -3  11 80.7942 43.6811   3
  -2  -3  10 14178.4 325.113   3
   2   3 -10 14270.8 450.054   4
  -2  -3   9 69824.3 1039.25   3
   2   3  -9 67441.1 1256.10   4
  -2  -3   8 65875.6 962.572   3
   2   3  -8 67836.1 1189.90   4
  -2  -3   7 28780.0 437.821   3
   2   3  -7 29390.7 642.534   4
   2   3  -6 3971.85 197.056   4
   2   3  -5 50.6370 31.4622   2
   2   3  -5-5.90550 43.9703   4
   2   3  -4 33970.2 678.218   4
   2   3  -4 34824.3 651.111   2
   2   3  -3 140840. 2108.67   4
  -2  -3   3 144540. 2108.83   4
  -2  -3   3 143956. 2066.21   2
   2   3  -2 293537. 3787.38   3
  -2  -3   2 298375. 3975.82   4
   2   3  -2 287510. 3971.90   4
  -2  -3   2 300152. 3930.44   2
   2   3  -1 186008. 2528.25   3
   2   3  -1 184695. 2656.92   4
   2   3  -1 195893. 2648.85   1
  -2  -3   1 179440. 2556.34   3
  -2  -3   1 193072. 2670.38   4
  -2  -3   0 54295.3 894.321   3
   2   3   0 55298.9 869.791   3
   2   3   0 57548.6 920.811   1
   2   3   0 55738.7 942.970   4
  -2  -3   0 56545.0 948.564   4
   2   3   1 6385.88 206.468   1
  -2  -3  -1 8280.92 245.546   3
   2   3   1 6121.46 206.205   3
  -2  -3  -1 6920.30 233.585   4
   2   3   1 6566.75 232.090   4
  -2  -3  -2 957.017 89.7298   4
  -2  -3  -2 948.942 94.6014   3
  -2  -3  -2 836.570 75.4395   1
   2   3   2 894.855 93.2941   4
   2   3   2 797.975 68.3187   1
   2   3   2 832.441 82.7116   3
  -2  -3  -3 15778.3 431.926   3
  -2  -3  -3 15626.1 398.257   4
   2   3   3 15917.0 410.572   3
   2   3   3 15732.3 399.873   4
  -2  -3  -3 15580.0 349.592   1
   2   3   3 15617.6 346.135   1
  -2  -3  -4 86859.3 1450.68   3
  -2  -3  -4 86490.3 1292.32   1
   2   3   4 85126.0 1290.03   1
  -2  -3  -4 85546.1 1383.45   4
   2   3   4 85049.0 1397.85   4
   2   3   5 140371. 2010.89   1
  -2  -3  -5 139694. 2007.12   1
  -2  -3  -5 142220. 2202.09   3
  -2  -3  -6 51665.3 1028.32   3
   2   3   6 51224.5 852.257   1
  -2  -3  -6 50578.8 843.049   1
   2   3   7 8652.78 256.661   1
  -2  -3  -7 9098.49 367.797   3
  -2  -3  -7 9162.89 259.564   1
  -2  -3  -8 3967.83 255.764   3
   2   3   8 4069.15 172.154   1
  -2  -3  -8 4660.93 181.645   1
  -2  -3  -9 6645.00 339.097   3
  -2  -3  -9 6636.94 232.257   1
  -2  -3 -10 1640.18 116.445   1
  -2  -3 -10 1674.43 176.505   3
  -2  -3 -11 2269.21 143.669   1
  -2  -3 -11 2182.89 205.853   3
  -2  -3 -12 16656.8 442.718   1
  -2  -3 -12 16573.8 604.469   3
  -2  -3 -13 3962.37 203.994   1
  -2  -3 -13 3801.39 289.753   3
  -2  -3 -14 142.727 94.3333   3
  -2  -3 -15 2381.31 253.961   3
  -2  -3 -16 7215.12 447.169   3
  -2  -3 -17 2567.60 283.533   3
   2   4 -19-11.1678 81.9082   4
   2   4 -18 281.785 102.525   4
   2   4 -17 3723.08 295.695   4
   2   4 -16 21947.0 736.705   4
   2   4 -15 31355.8 868.596   4
   2   4 -14 17709.5 606.773   4
   2   4 -13 895.958 141.892   4
   2   4 -12-26.1068 54.9277   4
   2   4 -11 2997.90 211.947   4
  -2  -4  10 50277.8 742.009   3
   2   4 -10 48526.7 1029.98   4
   2   4  -9 116383. 1915.07   4
   2   4  -8 113162. 1853.27   4
   2   4  -7 43715.1 885.143   4
   2   4  -6 5.97380 43.5345   4
   2   4  -5 28.5632 40.6926   4
   2   4  -4 286.982 66.4062   4
  -2  -4   4 176.485 48.8290   2
   2   4  -3 36329.4 728.857   4
  -2  -4   3 35761.4 690.214   2
  -2  -4   2 84322.6 1195.80   3
   2   4  -2 83521.8 1179.58   3
  -2  -4   2 85034.7 1332.53   2
   2   4  -2 81660.7 1357.34   4
   2   4  -1 56490.4 872.427   3
   2   4  -1 59223.5 994.847   1
   2   4  -1 57103.7 997.503   4
  -2  -4   1 55072.9 886.951   3
   2   4   0 15150.8 381.150   1
   2   4   0 14449.8 389.880   4
   2   4   0 14384.4 333.268   3
  -2  -4   0 14190.1 345.824   3
   2   4   1 2919.53 147.868   3
   2   4   1 2882.99 153.829   1
   2   4   1 2781.33 157.072   4
  -2  -4  -1 2968.66 154.859   3
   2   4   2 13182.5 365.291   3
  -2  -4  -2 12531.7 343.509   1
   2   4   2 13067.7 339.849   1
   2   4   2 13601.8 377.404   4
  -2  -4  -2 12761.0 366.586   3
   2   4   3 17585.6 468.040   3
  -2  -4  -3 18258.1 427.415   1
   2   4   3 19412.1 473.955   4
  -2  -4  -3 18388.7 483.118   3
   2   4   3 18982.3 429.750   1
   2   4   4 171.368 44.1597   1
  -2  -4  -4 149.772 46.6710   1
   2   4   4 182.854 57.9592   4
  -2  -4  -4 235.154 71.9025   3
  -2  -4  -5 17755.5 413.533   1
   2   4   5 16932.1 409.243   1
   2   4   5 17666.4 469.129   4
  -2  -4  -5 16562.8 498.477   3
  -2  -4  -6 189.788 76.0855   3
  -2  -4  -6 200.087 49.5871   1
   2   4   6 147.532 40.7078   1
  -2  -4  -7 157.150 71.6975   3
  -2  -4  -7 137.654 36.2078   1
   2   4   7 146.845 41.9506   1
   2   4   8 876.052 88.6690   1
  -2  -4  -8 1011.73 133.724   3
  -2  -4  -8 1112.89 97.5053   1
   2   4   9 11205.3 342.533   1
  -2  -4  -9 12228.9 351.671   1
  -2  -4  -9 12371.0 479.439   3
  -2  -4 -10 21312.7 511.293   1
  -2  -4 -10 21276.5 678.369   3
  -2  -4 -11 373.542 114.589   3
  -2  -4 -11 267.417 59.7060   1
  -2  -4 -12 2679.23 169.459   1
  -2  -4 -12 2386.36 230.607   3
  -2  -4 -13 138.741 90.4888   3
  -2  -4 -14 342.024 118.165   3
  -2  -4 -15-56.5166 104.525   3
  -2  -4 -16 519.481 140.919   3
  -2  -4 -17 126.003 92.9015   3
   2   5 -18 2338.41 250.260   4
   2   5 -17 6659.78 405.700   4
   2   5 -16 22244.0 751.916   4
   2   5 -15 36028.0 973.321   4
   2   5 -14 10331.3 468.672   4
   2   5 -13 454.553 107.721   4
   2   5 -12 566.973 109.881   4
   2   5 -11 39.6199 64.9816   4
   2   5 -10 839.822 124.223   4
   2   5  -9 13935.0 471.567   4
   2   5  -8 18961.9 553.539   4
   2   5  -7 3973.52 226.325   4
   2   5  -6 60.5400 47.9464   4
   2   5  -5 9729.55 353.455   4
   2   5  -4 20705.6 538.494   4
  -2  -5   4 20161.7 506.619   2
   2   5  -3 6705.82 143.857   3
   2   5  -3 6619.47 270.730   4
  -2  -5   3 6613.20 258.614   2
  -2  -5   2 14.1486 19.5181   3
   2   5  -2 28.9456 19.1549   3
   2   5  -2 53.8361 48.9351   4
  -2  -5   2 32.6698 40.5184   2
   2   5  -1 1868.62 137.448   4
   2   5  -1 1732.11 99.2438   3
  -2  -5   1 1884.77 104.744   3
   2   5   0 208.511 45.0343   3
  -2  -5   0 249.214 48.8521   3
   2   5   0 182.696 59.8676   4
   2   5   1 309.000 61.6852   3
   2   5   1 366.355 68.7346   4
  -2  -5  -1 327.088 62.5836   3
   2   5   2 13594.9 395.545   3
  -2  -5  -2 14572.3 399.857   1
   2   5   2 14196.5 412.945   4
  -2  -5  -2 14274.6 409.539   3
  -2  -5  -3 16842.8 444.682   1
   2   5   3 17907.7 477.300   4
  -2  -5  -3 17993.3 491.051   3
  -2  -5  -4 273.481 82.6472   3
   2   5   4 134.291 53.4782   4
  -2  -5  -4 112.408 44.5803   1
  -2  -5  -5 4834.96 217.255   1
   2   5   5 5060.78 245.651   4
  -2  -5  -5 5129.97 269.007   3
  -2  -5  -6 6796.75 259.404   1
  -2  -5  -6 6635.52 323.276   3
  -2  -5  -7 94.7177 44.9126   1
  -2  -5  -7 213.318 85.4253   3
  -2  -5  -8 4779.98 221.666   1
  -2  -5  -8 4566.02 289.171   3
  -2  -5  -9 40.5031 39.6856   1
  -2  -5  -9 122.838 83.0027   3
  -2  -5 -10 432.629 74.3855   1
  -2  -5 -10 521.298 119.786   3
  -2  -5 -11 7421.76 295.050   1
  -2  -5 -11 7431.32 410.865   3
  -2  -5 -12 9563.47 341.907   1
  -2  -5 -12 8401.82 453.179   3
  -2  -5 -13 1659.66 213.509   3
  -2  -5 -14 423.447 132.785   3
  -2  -5 -15 3891.77 330.559   3
  -2  -5 -16 1340.45 211.050   3
   2   6 -17 502.526 130.650   4
   2   6 -16 590.003 131.899   4
   2   6 -15 3500.71 287.716   4
   2   6 -14-12.5210 78.4895   4
   2   6 -13-15.0009 68.0246   4
   2   6 -12 568.894 117.584   4
   2   6 -11 4738.40 298.047   4
   2   6 -10 9127.39 399.185   4
   2   6  -9-58.5064 67.0242   4
   2   6  -8 548.603 97.9376   4
   2   6  -7 973.927 125.942   4
   2   6  -6 684.471 105.135   4
   2   6  -5 1505.36 143.168   4
  -2  -6   5 1521.03 138.399   2
   2   6  -4 4246.80 233.214   4
  -2  -6   4 4128.92 219.464   2
  -2  -6   3 753.785 96.2437   2
   2   6  -3 933.365 113.815   4
   2   6  -3 800.240 52.4961   3
   2   6  -2 7350.51 208.437   3
   2   6  -2 8033.07 314.214   4
  -2  -6   2 7646.21 300.413   2
   2   6  -1 13664.5 340.262   3
   2   6  -1 14390.2 436.543   4
  -2  -6   1 14627.2 348.645   3
   2   6   0 8.14394 41.8950   4
  -2  -6   0-3.63248 29.0614   3
   2   6   0 25.8585 30.1380   3
   2   6   1 4935.39 222.327   3
   2   6   1 5198.60 248.679   4
  -2  -6  -1 5307.21 227.188   3
   2   6   2 258.827 72.5119   4
  -2  -6  -2 222.196 60.1127   3
   2   6   3 3042.74 196.408   4
  -2  -6  -3 3065.53 188.112   1
  -2  -6  -3 3076.12 197.902   3
  -2  -6  -4 8466.13 315.476   1
   2   6   4 7886.81 323.857   4
  -2  -6  -4 7848.74 337.961   3
  -2  -6  -5 25945.7 622.123   1
   2   6   5 25716.9 658.508   4
  -2  -6  -5 25650.4 688.825   3
  -2  -6  -6 16696.2 477.692   1
   2   6   6 17871.4 526.399   4
  -2  -6  -6 17489.3 559.627   3
  -2  -6  -7 2326.16 166.405   1
  -2  -6  -7 2674.27 215.126   3
  -2  -6  -8 6850.56 286.897   1
  -2  -6  -8 5852.86 340.678   3
  -2  -6  -9 1561.52 189.704   3
  -2  -6  -9 1888.87 149.089   1
  -2  -6 -10 1052.55 115.855   1
  -2  -6 -10 948.052 157.307   3
  -2  -6 -11 2110.31 164.513   1
  -2  -6 -11 2168.87 227.860   3
  -2  -6 -12 6523.27 405.196   3
  -2  -6 -13 1156.08 188.602   3
  -2  -6 -14 1148.72 198.020   3
  -2  -6 -15 1919.41 241.568   3
   2   7 -16-86.0453 87.4847   4
   2   7 -15 116.865 66.4921   4
   2   7 -14 199.626 82.8319   4
   2   7 -13 272.934 91.1313   4
   2   7 -12 1053.88 157.085   4
   2   7 -11 1434.01 168.861   4
   2   7 -10 149.590 71.1053   4
   2   7  -9 8245.29 391.813   4
   2   7  -8 10285.6 432.020   4
   2   7  -7 3173.33 227.894   4
   2   7  -6 1743.22 170.703   4
   2   7  -5 9337.10 382.598   4
  -2  -7   5 9434.56 371.866   2
  -2  -7   4 1602.26 146.579   2
   2   7  -4 1569.71 151.191   4
   2   7  -3 4116.80 140.191   3
   2   7  -3 4286.79 245.152   4
  -2  -7   3 4264.25 237.388   2
   2   7  -2 24966.6 494.365   3
   2   7  -2 25575.0 655.438   4
  -2  -7   2 25678.9 647.592   2
   2   7  -1 15291.9 384.238   3
  -2  -7   1 15642.4 480.395   2
   2   7  -1 15968.9 491.993   4
  -2  -7   0 92.3206 42.0409   3
   2   7   0 107.576 59.3953   4
   2   7   0 96.4781 42.6693   3
   2   7   1 2688.37 188.498   4
  -2  -7  -1 2567.04 162.571   3
   2   7   2 2591.70 187.253   4
  -2  -7  -2 2459.22 172.673   3
  -2  -7  -3 18.0820 44.5276   1
  -2  -7  -3 154.915 57.1423   3
   2   7   3 104.849 60.1907   4
   2   7   4 8.72604 48.7203   4
  -2  -7  -4 47.8792 46.5222   1
  -2  -7  -4 27.0106 56.8172   3
  -2  -7  -5 7875.68 331.719   1
   2   7   5 7850.23 339.293   4
  -2  -7  -5 7494.39 352.320   3
   2   7   6 1043.46 126.342   4
  -2  -7  -6 842.909 132.152   3
  -2  -7  -6 818.606 112.490   1
  -2  -7  -7 1845.38 158.856   1
  -2  -7  -7 1816.87 187.828   3
  -2  -7  -8 1965.65 164.401   1
  -2  -7  -8 2060.31 209.732   3
  -2  -7  -9 2002.75 168.657   1
  -2  -7  -9 1866.44 209.770   3
  -2  -7 -10 11035.2 407.838   1
  -2  -7 -10 10945.3 509.742   3
  -2  -7 -11 5966.91 381.989   3
  -2  -7 -12 25.3429 99.5253   3
  -2  -7 -13 336.253 135.441   3
  -2  -7 -14 12.7183 85.3032   3
   2   8 -14 2787.23 265.549   4
   2   8 -13 524.212 123.958   4
   2   8 -12 1140.22 170.806   4
   2   8 -11 13.3638 77.2629   4
   2   8 -10 560.012 122.368   4
   2   8  -9 3953.31 284.130   4
   2   8  -8 9056.07 417.412   4
   2   8  -7 1312.16 154.318   4
   2   8  -6 1801.25 182.572   4
  -2  -8   5 230.456 75.8077   2
   2   8  -5 128.150 68.1173   4
   2   8  -4 1897.52 181.107   4
  -2  -8   4 2138.27 181.154   2
   2   8  -3 4918.90 280.209   4
  -2  -8   3 4483.39 261.183   2
   2   8  -2 12.9858 54.1117   4
  -2  -8   2 27.2111 49.5769   2
   2   8  -1 134.811 70.6791   4
  -2  -8   1-77.3172 69.3271   2
   2   8   0 380.770 83.5704   4
  -2  -8  -1 679.112 88.1399   3
   2   8   1 753.828 113.761   4
   2   8   2 1582.10 154.983   4
  -2  -8  -2 1588.51 145.776   3
   2   8   3 21702.3 621.169   4
  -2  -8  -3 21121.6 597.725   3
  -2  -8  -4 12293.9 451.920   1
   2   8   4 12235.4 449.580   4
  -2  -8  -4 12194.5 451.806   3
  -2  -8  -5 784.729 122.877   3
   2   8   5 874.231 126.454   4
  -2  -8  -5 853.158 123.470   1
  -2  -8  -6-57.8210 68.5676   3
  -2  -8  -6 65.8160 56.5052   1
   2   8   6 33.4543 57.3710   4
  -2  -8  -7 570.892 105.311   1
  -2  -8  -7 676.837 120.731   3
  -2  -8  -8 512.910 119.698   3
  -2  -8  -8 572.696 106.032   1
  -2  -8  -9 2707.76 212.290   1
  -2  -8  -9 2446.19 244.343   3
  -2  -8 -10 6594.51 404.793   3
  -2  -8 -11 678.698 150.331   3
  -2  -8 -12 4621.78 361.295   3
  -2  -8 -13 4170.68 350.046   3
   2   9 -13 659.746 138.664   4
   2   9 -12 139.042 70.6324   4
   2   9 -11 825.980 151.920   4
   2   9 -10 5416.56 349.478   4
   2   9  -9 2593.66 242.500   4
   2   9  -8 45.7277 71.1987   4
   2   9  -7 483.366 107.664   4
   2   9  -6 2437.82 219.758   4
  -2  -9   5 286.312 91.3863   2
   2   9  -5 352.638 98.4927   4
   2   9  -4 13956.4 518.184   4
  -2  -9   4 13335.8 502.720   2
  -2  -9   3 11671.0 462.881   2
   2   9  -3 11955.4 471.445   4
  -2  -9   2 3043.29 229.515   2
   2   9  -2 2900.26 226.012   4
   2   9  -1 971.501 130.619   4
  -2  -9   1 1254.78 153.848   2
   2   9   0 3653.07 249.376   4
  -2  -9   0 3190.65 236.272   2
   2   9   1 69.1177 59.6110   4
   2   9   2 2646.74 212.213   4
   2   9   3 5124.87 298.528   4
  -2  -9  -3 4974.42 279.254   3
  -2  -9  -4 114.209 73.8054   3
   2   9   4 26.1143 52.9711   4
  -2  -9  -5 9981.63 438.777   3
   2   9   5 10458.1 438.135   4
  -2  -9  -5 10395.0 438.813   1
  -2  -9  -6 24247.0 722.941   1
   2   9   6 26073.0 742.977   4
  -2  -9  -6 24700.1 756.377   3
  -2  -9  -7 10122.7 478.143   3
  -2  -9  -7 10895.7 453.280   1
  -2  -9  -8 812.062 126.819   1
  -2  -9  -8 581.485 122.170   3
  -2  -9  -9-42.6706 81.8119   3
  -2  -9  -9-12.9661 56.5235   1
  -2  -9 -10-1.58873 93.0510   3
  -2  -9 -11 5749.48 394.959   3
   2  10 -11 1286.65 194.686   4
   2  10 -10 5023.86 354.882   4
   2  10  -9 240.031 107.328   4
   2  10  -8 2810.17 256.907   4
   2  10  -7 5097.97 336.311   4
   2  10  -6 1309.13 179.900   4
  -2 -10   5 87.2746 66.3859   2
   2  10  -5 47.9458 66.5984   4
  -2 -10   4-14.6084 65.5255   2
   2  10  -4-34.3832 80.1138   4
   2  10  -3 494.825 105.707   4
  -2 -10   3 485.616 110.808   2
   2  10  -2 15964.3 582.318   4
  -2 -10   2 15663.4 580.997   2
   2  10  -1 42050.9 1022.73   4
  -2 -10   1 41849.2 1038.54   2
   2  10   0 20986.9 672.389   4
  -2 -10   0 20466.6 681.101   2
   2  10   1 5900.10 338.739   4
   2  10   2 135.165 67.1270   4
   2  10   3 1421.79 165.067   4
   2  10   4 5074.93 311.430   4
   2  10   5 34575.1 903.743   4
  -2 -10  -5 32351.7 884.763   3
  -2 -10  -6 44036.4 1106.89   3
   2  10   6 45632.7 1095.96   4
  -2 -10  -7 14769.8 570.066   1
  -2 -10  -7 14925.4 601.473   3
  -2 -10  -8 1972.85 203.512   1
  -2 -10  -8 1659.62 209.610   3
  -2 -10  -9 416.169 119.557   3
  -2 -10 -10 0.95560 97.1436   3
   2  11  -9 12248.7 572.146   4
   2  11  -8 25467.6 852.252   4
   2  11  -7 25443.8 837.418   4
   2  11  -6 8987.00 465.622   4
  -2 -11   5 19.4690 72.2242   2
   2  11  -5 189.382 98.3223   4
   2  11  -4 53.8357 73.5383   4
  -2 -11   4 189.440 87.7843   2
   2  11  -3 2827.44 252.581   4
  -2 -11   3 2689.69 243.928   2
   2  11  -2 21190.5 710.195   4
  -2 -11   2 20222.1 708.693   2
   2  11  -1 30556.6 886.164   4
  -2 -11   1 30849.2 899.297   2
   2  11   0 22052.6 726.714   4
  -2 -11   0 21687.5 739.899   2
   2  11   1 4564.33 312.023   4
  -2 -11  -1 4391.83 322.478   2
   2  11   2 1260.96 168.665   4
   2  11   3 1524.69 186.071   4
   2  11   4 51.0764 66.6323   4
   2  11   5 1158.48 168.669   4
   2  11   6 6407.20 383.685   4
   2  12  -6 3319.62 297.284   4
  -2 -12   5 708.158 145.732   2
   2  12  -5 823.599 154.548   4
  -2 -12   4 1995.88 229.229   2
   2  12  -4 1763.69 216.786   4
  -2 -12   3 3034.15 276.953   2
   2  12  -3 3304.30 287.604   4
  -2 -12   2 475.935 122.281   2
   2  12  -2 437.501 125.233   4
   2  12  -1 1153.37 179.276   4
  -2 -12   1 1255.00 185.426   2
   2  12   0 4033.86 313.236   4
  -2 -12   0 3983.82 320.886   2
   2  12   1 776.360 145.462   4
  -2 -12  -1 859.432 161.305   2
  -2 -12  -2 981.610 172.306   2
   2  12   2 1021.78 166.055   4
   2  12   3 8010.16 440.373   4
   2  12   4 7787.61 432.898   4
   2  13  -1 42.7142 95.6175   4
   2  13   0 274.280 119.673   4
   2  13   1 154.060 92.7931   4
   2  13   2 572.103 152.400   4
   3 -14  -1 5543.20 407.748   1
   3 -14  -1 5697.17 392.994   2
   3 -14   0 625.552 157.187   1
   3 -14   0 515.364 128.765   2
   3 -14   1 677.396 137.843   2
   3 -14   2 5165.00 365.410   2
  -3  14  -3 3863.25 282.977   4
   3 -14   3 3476.19 303.682   2
  -3  14  -4 976.386 153.520   4
  -3  14  -5 36.6645 75.7305   4
  -3  14  -6-38.3506 85.3246   4
  -3  14  -7 394.789 119.867   4
  -3  14  -8 582.104 140.773   4
   3 -13  -8 1616.35 218.317   1
   3 -13  -7 552.717 137.281   1
   3 -13  -6 457.347 129.351   1
   3 -13  -5 2704.44 269.970   1
   3 -13  -4 10038.8 526.589   1
   3 -13  -3 5515.50 385.452   1
   3 -13  -2 294.222 120.217   1
   3 -13  -2 282.645 93.9849   2
   3 -13  -1 636.141 150.863   1
   3 -13  -1 614.015 133.718   2
   3 -13   0 925.900 169.902   1
   3 -13   0 914.612 154.701   2
  -3  13  -1 94.7286 69.0309   4
   3 -13   1 68.8467 83.0007   1
   3 -13   1 195.679 95.1998   2
   3 -13   2 3634.85 309.676   1
  -3  13  -2 3720.85 255.768   4
   3 -13   2 3821.20 295.202   2
  -3  13  -3 15833.5 560.404   4
   3 -13   3 14921.0 608.164   2
  -3  13  -4 9617.17 441.544   4
   3 -13   4 10790.8 509.926   2
   3 -13   5 725.756 133.276   2
  -3  13  -5 947.787 142.716   4
  -3  13  -6 1025.85 153.356   4
  -3  13  -7 379.619 111.275   4
  -3  13  -8 160.393 77.1674   4
  -3  13  -9 2253.85 235.059   4
  -3  13 -10 3547.90 304.813   4
   3 -12 -11 4561.99 351.391   1
   3 -12 -10 5633.50 386.742   1
   3 -12  -9 2578.57 263.790   1
   3 -12  -8 579.073 142.544   1
   3 -12  -7 709.643 143.491   1
   3 -12  -6 1205.13 178.656   1
   3 -12  -5 2671.53 256.335   1
   3 -12  -4 14610.7 610.498   1
   3 -12  -3 10451.9 502.919   1
   3 -12  -2 911.951 159.449   1
  -3  12   1-36.2276 50.4254   4
   3 -12  -1-63.0979 81.5910   1
   3 -12  -1-1.14087 68.3500   2
   3 -12   0 246.309 103.989   1
  -3  12   0 341.432 89.4000   4
   3 -12   0 316.938 99.6993   2
  -3  12  -1 93.7584 63.4318   4
   3 -12   1 52.9371 85.2545   1
   3 -12   1-1.12219 61.5723   2
  -3  12  -2 2023.85 177.615   4
   3 -12   2 1623.82 195.418   1
   3 -12   2 1752.10 196.673   2
  -3  12  -3 4149.02 261.318   4
   3 -12   3 4101.17 290.960   2
   3 -12   4 527.386 117.224   2
  -3  12  -4 334.580 90.7451   4
  -3  12  -5 8220.79 392.114   4
   3 -12   5 8480.10 428.598   2
  -3  12  -6 6383.97 349.457   4
  -3  12  -7 313.136 84.2929   4
  -3  12  -8 53.1824 64.8783   4
  -3  12  -9-50.8294 81.8311   4
  -3  12 -10 651.815 137.678   4
  -3  12 -11 4398.49 331.063   4
   3 -11 -13 731.051 157.681   1
   3 -11 -12 1204.66 181.259   1
   3 -11 -11 6184.79 392.398   1
   3 -11 -10 6456.34 398.847   1
   3 -11  -9-73.0157 91.3666   1
   3 -11  -8 2835.99 258.516   1
   3 -11  -7 563.496 131.905   1
   3 -11  -6-53.6998 84.0069   1
   3 -11  -5 857.666 145.604   1
   3 -11  -4 1840.64 202.985   1
  -3  11   3 597.835 85.3978   4
   3 -11  -3 549.627 120.923   1
   3 -11  -2 18413.4 648.621   1
  -3  11   2 18556.9 500.358   4
   3 -11  -1 22816.0 730.520   1
  -3  11   1 23864.4 588.247   4
   3 -11  -1 20929.4 661.457   2
   3 -11   0 3847.72 281.589   1
   3 -11   0 3825.73 261.960   2
  -3  11   0 4096.09 226.740   4
   3 -11   1 325.795 99.4033   1
   3 -11   1 352.763 89.5232   2
  -3  11  -1 429.373 87.0709   4
   3 -11   2 149.224 72.7284   2
  -3  11  -2 127.448 59.0516   4
   3 -11   2 102.756 80.9892   1
  -3  11  -3 1269.19 140.537   4
   3 -11   3 1074.76 158.994   1
   3 -11   3 1113.29 145.897   2
  -3  11  -4 7027.06 333.259   4
   3 -11   4 6783.63 357.268   2
  -3  11  -5 13844.0 492.802   4
   3 -11   5 14184.4 534.071   2
  -3  11  -6 9928.22 425.837   4
  -3  11  -7 43.1765 64.9645   4
  -3  11  -8 4729.42 308.854   4
  -3  11  -9 497.148 114.800   4
  -3  11 -10 296.714 104.617   4
  -3  11 -11 2124.91 228.705   4
  -3  11 -12 341.958 121.915   4
  -3  11 -13 216.928 103.189   4
   3 -10 -15 1908.10 238.533   1
   3 -10 -14 2901.29 273.451   1
   3 -10 -13 328.539 106.820   1
   3 -10 -12-107.662 90.5518   1
   3 -10 -11 454.361 120.750   1
   3 -10 -10 341.295 112.167   1
   3 -10  -9 9436.20 458.666   1
   3 -10  -8 17542.4 629.992   1
   3 -10  -7 7067.30 379.982   1
   3 -10  -6 149.332 83.9788   1
  -3  10   5 104.051 38.6311   4
   3 -10  -5-16.7723 71.3927   1
  -3  10   4 1772.52 124.079   4
   3 -10  -4 1941.52 195.417   1
   3 -10  -3 992.090 142.592   1
  -3  10   3 1062.51 99.3666   4
   3 -10  -2 11988.9 484.909   1
  -3  10   2 13110.8 378.101   4
   3 -10  -1 15804.2 562.943   1
  -3  10   1 16811.1 449.831   4
   3 -10   0 652.362 107.568   2
   3 -10   0 864.019 132.914   1
  -3  10   0 712.734 94.0583   4
   3 -10   1 8357.70 397.242   1
  -3  10  -1 8593.12 324.421   4
   3 -10   1 8631.69 374.725   2
  -3  10  -2 9551.41 353.846   4
   3 -10   2 8937.51 407.709   1
   3 -10   2 8885.13 383.261   2
   3 -10   3 627.380 105.721   2
  -3  10  -3 504.191 87.2763   4
   3 -10   3 454.444 94.3029   1
   3 -10   4 558.452 104.166   2
   3 -10   4 612.335 112.303   1
  -3  10  -4 726.014 103.673   4
   3 -10   5 35.7329 59.2298   2
  -3  10  -5 33.1588 49.1907   4
  -3  10  -6 997.872 126.173   4
  -3  10  -7 7430.76 364.832   4
  -3  10  -7 7943.95 274.609   3
  -3  10  -8 15820.4 556.590   4
  -3  10  -9 1542.49 179.321   4
  -3  10 -10 862.466 144.052   4
  -3  10 -11 1266.98 179.106   4
  -3  10 -12 43.0956 79.3327   4
  -3  10 -13-51.9286 91.3839   4
  -3  10 -14 4360.46 346.756   4
   3  -9 -16 2359.58 250.252   1
   3  -9 -15 5498.32 373.142   1
   3  -9 -14 3677.49 300.710   1
   3  -9 -13-101.760 90.0915   1
   3  -9 -12 2672.37 248.388   1
   3  -9 -11 299.100 102.065   1
   3  -9 -10 72.4572 65.9916   1
   3  -9  -9 1226.00 161.096   1
   3  -9  -8 958.255 143.224   1
   3  -9  -7 911.201 133.298   1
   3  -9  -6 18070.1 599.075   1
  -3   9   5 13962.1 337.961   4
   3  -9  -5 12959.8 492.909   1
   3  -9  -4 23.2293 63.9965   1
  -3   9   4-6.54583 29.9150   4
   3  -9  -3 3266.19 167.831   4
  -3   9   3 4045.95 172.997   4
   3  -9  -3 3812.85 251.006   1
  -3   9   2 1178.62 96.8111   4
   3  -9  -2 1198.65 145.763   1
   3  -9  -1 5957.76 311.434   1
  -3   9   1 6104.31 233.641   4
   3  -9   0 11381.8 441.812   1
  -3   9   0 12342.8 359.087   4
   3  -9   0 11521.6 410.929   2
   3  -9   1 28179.1 745.481   1
   3  -9   1 27772.1 697.452   2
  -3   9  -1 28406.2 627.582   4
   3  -9   2 11958.6 453.246   1
  -3   9  -2 12425.3 383.172   4
   3  -9   2 11742.6 418.231   2
   3  -9   3 3902.17 250.373   1
  -3   9  -3 3308.08 194.981   4
   3  -9   3 3707.41 223.809   2
   3  -9   4 2568.58 206.518   1
  -3   9  -4 2402.74 174.966   4
   3  -9   4 2471.48 187.152   2
  -3   9  -5 353.555 83.4788   4
  -3   9  -6 170.223 65.7639   4
  -3   9  -7 3336.06 227.726   4
  -3   9  -7 3329.23 170.992   3
  -3   9  -8 6170.87 240.968   3
  -3   9  -8 5429.53 306.659   4
  -3   9  -9 2101.22 141.018   3
  -3   9  -9 2106.80 194.310   4
  -3   9 -10 111.096 77.0878   4
  -3   9 -11 414.000 105.492   4
  -3   9 -12 9706.52 463.608   4
  -3   9 -13 6373.52 384.439   4
  -3   9 -14-31.7029 75.3915   4
  -3   9 -15 185.336 109.901   4
   3  -8 -17 133.300 82.4526   1
   3  -8 -16 301.144 120.051   1
   3  -8 -15 331.326 105.893   1
   3  -8 -14 1593.11 195.991   1
   3  -8 -13 14802.0 579.587   1
   3  -8 -12 10558.5 471.411   1
   3  -8 -11 643.708 124.513   1
   3  -8 -10 2694.38 227.111   1
   3  -8  -9 4319.91 283.565   1
   3  -8  -8 1802.52 179.712   1
   3  -8  -7 5597.10 308.798   1
   3  -8  -6 35738.9 851.475   1
   3  -8  -6 32710.7 568.852   4
  -3   8   5 14639.6 327.215   4
   3  -8  -5 13982.3 492.189   1
   3  -8  -5 14414.0 320.589   4
   3  -8  -4 528.141 96.5561   1
  -3   8   4 365.605 49.0857   4
   3  -8  -4 265.974 45.8658   4
   3  -8  -3 772.323 111.935   1
  -3   8   3 651.563 64.1062   4
   3  -8  -2 74.1625 61.7037   1
  -3   8   2 16.2699 25.7279   4
  -3   8   1 7127.93 235.604   4
   3  -8  -1 6947.72 317.233   1
   3  -8   0 464.249 80.8710   2
   3  -8   0 499.636 94.0311   1
  -3   8   0 441.383 58.3258   4
   3  -8   1 4448.65 251.081   1
   3  -8   1 4698.39 236.562   2
  -3   8  -1 4781.08 203.802   4
   3  -8   2 821.609 109.992   1
   3  -8   2 1086.29 116.131   2
  -3   8  -2 891.738 90.4688   4
   3  -8   3 870.868 107.347   2
   3  -8   3 872.594 115.316   1
  -3   8  -3 867.326 99.5112   4
   3  -8   4 188.736 63.7242   2
   3  -8   4 201.620 69.9665   1
  -3   8  -4 175.896 60.7049   4
  -3   8  -5 23775.1 604.124   4
  -3   8  -6 30166.9 617.343   3
  -3   8  -6 31041.5 733.329   4
  -3   8  -7 10795.8 319.076   3
  -3   8  -7 10100.4 396.019   4
  -3   8  -8 1476.90 115.343   3
  -3   8  -8 1258.01 143.918   4
  -3   8  -9 70.0916 50.9841   4
  -3   8  -9 65.4068 38.6283   3
  -3   8 -10 1679.01 131.522   3
  -3   8 -10 1682.08 176.827   4
  -3   8 -11 814.841 97.2989   3
  -3   8 -11 769.598 128.042   4
  -3   8 -12 8151.33 416.584   4
  -3   8 -13 7364.84 405.558   4
  -3   8 -14 2161.51 228.488   4
  -3   8 -15 124.773 67.0547   4
  -3   8 -16 1220.91 186.793   4
   3  -7 -17 483.369 127.747   1
   3  -7 -16 1296.25 184.819   1
   3  -7 -15 172.649 76.0668   1
   3  -7 -14 2499.08 231.685   1
   3  -7 -13 4221.06 290.242   1
   3  -7 -12 6202.25 346.313   1
   3  -7 -11 179.585 79.8195   1
   3  -7 -10 1791.75 178.851   1
   3  -7  -9 1111.45 140.861   1
   3  -7  -8 7807.29 357.563   1
   3  -7  -8 7507.23 167.994   4
   3  -7  -7 9113.13 192.082   4
   3  -7  -7 8587.34 372.787   1
   3  -7  -6 1122.40 58.4685   4
   3  -7  -6 1153.20 133.946   1
   3  -7  -5 56.1829 19.7003   4
   3  -7  -5 44.3258 49.6046   1
  -3   7   4 34.7628 19.2809   4
   3  -7  -4 21.7952 50.0055   1
   3  -7  -4 48.0344 18.1545   4
  -3   7   3 36.3799 25.9069   4
   3  -7  -3-8.52302 48.1711   1
  -3   7   2 12048.6 281.324   4
   3  -7  -2 12097.3 409.930   1
  -3   7   1 75707.1 1152.14   4
   3  -7  -1 72182.4 1320.49   1
  -3   7   0 38975.0 703.869   4
   3  -7   0 40911.1 846.720   1
   3  -7   1 6338.55 255.759   2
  -3   7  -1 6113.20 221.600   4
   3  -7   1 6817.10 286.028   1
   3  -7   2 2291.58 168.001   1
  -3   7  -2 2220.35 135.821   4
   3  -7   2 2096.16 145.062   2
   3  -7   3 2055.77 159.189   1
  -3   7  -3 1945.69 132.628   4
   3  -7   3 1937.80 140.705   2
   3  -7   4 2076.87 155.360   1
  -3   7  -4 2153.26 146.327   4
   3  -7   4 2025.14 149.595   2
  -3   7  -5 92.2507 51.5106   4
  -3   7  -6 13913.8 362.804   3
  -3   7  -6 14198.9 442.577   4
  -3   7  -7 8913.61 285.350   3
  -3   7  -7 9045.28 356.256   4
  -3   7  -8 40.7746 36.8059   3
  -3   7  -8 149.143 70.3238   4
  -3   7  -9 9409.13 310.895   3
  -3   7  -9 8677.33 378.209   4
  -3   7 -10 25411.8 588.595   3
  -3   7 -10 24590.8 707.870   4
  -3   7 -11 21108.2 541.674   3
  -3   7 -11 20959.6 662.856   4
  -3   7 -12 9634.55 353.940   3
  -3   7 -12 9713.92 443.996   4
  -3   7 -13 131.009 52.8263   3
  -3   7 -13 324.236 103.920   4
  -3   7 -14 146.341 83.4386   4
  -3   7 -15 224.241 106.667   4
  -3   7 -16 6618.11 412.159   4
  -3   7 -17 18338.9 731.809   4
   3  -6 -18 120.097 93.7750   1
   3  -6 -17 632.283 139.113   1
   3  -6 -16 25.7419 80.1738   1
   3  -6 -15 3895.50 290.187   1
   3  -6 -14 9921.84 454.057   1
   3  -6 -13 3997.13 276.430   1
   3  -6 -12 59.2576 57.4818   1
   3  -6 -11 56.6318 72.3139   1
   3  -6 -10 2373.52 193.499   1
   3  -6  -9 2556.08 91.6495   4
   3  -6  -9 2453.20 193.685   1
   3  -6  -8 29995.9 744.336   1
   3  -6  -8 29849.5 458.097   4
   3  -6  -7 20266.9 575.894   1
   3  -6  -7 20114.9 311.575   4
   3  -6  -6 13774.7 450.786   1
   3  -6  -5 1504.27 141.229   1
   3  -6  -4 12366.2 406.540   1
  -3   6   4 13153.1 238.795   4
  -3   6   3 39734.7 611.633   4
   3  -6  -3 40100.9 828.047   1
   3  -6  -2 764.580 101.453   1
  -3   6   2 809.671 55.1568   4
   3  -6  -1 5203.65 236.221   1
  -3   6   1 4928.16 158.322   4
   3  -6   0 6901.40 272.559   1
  -3   6   0 7115.88 210.002   4
   3  -6   1 10.3691 47.2654   1
  -3   6  -1-6.65873 30.5378   4
   3  -6   1 81.1886 41.1687   2
   3  -6   2 4754.82 220.415   1
  -3   6  -2 5315.69 201.861   4
   3  -6   2 4942.33 204.301   2
   3  -6   3 58555.6 1049.49   1
  -3   6  -3 57674.2 1000.40   4
   3  -6   3 58474.8 1014.65   2
  -3   6  -4 115953. 1770.36   4
   3  -6   4 111982. 1783.71   1
  -3   6  -5 43061.9 767.389   3
  -3   6  -5 42037.6 837.130   4
  -3   6  -6 3894.56 173.146   3
  -3   6  -6 3681.77 203.281   4
  -3   6  -7 6799.25 241.406   3
  -3   6  -7 6503.49 284.135   4
  -3   6  -8 62.0265 45.2064   3
  -3   6  -9 5825.13 240.433   3
  -3   6 -10 35782.4 742.548   3
  -3   6 -10 34433.9 842.243   4
  -3   6 -11 49945.2 973.072   3
  -3   6 -11 48251.4 1079.70   4
  -3   6 -12 6643.58 294.242   3
  -3   6 -12 5526.55 321.861   4
  -3   6 -13 153.155 67.4344   3
  -3   6 -13 147.617 77.2556   4
  -3   6 -14 239.681 72.0056   3
  -3   6 -14 330.054 98.2721   4
  -3   6 -15-3.75546 65.2856   3
  -3   6 -15 100.113 76.1055   4
  -3   6 -16 1750.75 209.033   4
  -3   6 -17 5007.98 369.609   4
   3  -5 -19 181.188 100.711   1
   3  -5 -18 662.272 144.409   1
   3  -5 -17 1904.63 215.974   1
   3  -5 -16 186.466 84.0496   1
   3  -5 -15 3768.26 278.969   1
   3  -5 -14 14291.6 538.287   1
   3  -5 -13 4670.79 292.002   1
   3  -5 -12 560.687 64.2026   4
   3  -5 -12 823.158 121.641   1
   3  -5 -11 8294.75 234.211   4
   3  -5 -11 8189.72 367.737   1
   3  -5 -10 23192.7 439.495   4
   3  -5 -10 23103.7 645.601   1
   3  -5 -10 23893.2 438.152   4
   3  -5  -9 13383.2 276.674   4
   3  -5  -9 13706.8 273.572   4
   3  -5  -9 13418.3 455.525   1
   3  -5  -8 2018.66 167.021   1
   3  -5  -8 2383.04 81.5846   4
   3  -5  -7 1288.30 134.774   1
   3  -5  -6 97.7964 56.6018   1
   3  -5  -5 242.834 69.7333   1
   3  -5  -4 68019.9 1194.44   1
   3  -5  -3 108200. 1746.19   1
  -3   5   3 111180. 1484.58   4
  -3   5   2 79535.8 1115.25   4
   3  -5  -2 81428.9 1331.95   1
  -3   5   1 38338.5 742.663   1
  -3   5   1 36669.1 586.660   4
   3  -5  -1 35727.4 723.476   1
  -3   5   0 101.737 45.9851   1
  -3   5   0 139.581 33.3547   4
   3  -5   0 86.1773 52.1649   1
  -3   5  -1 17.8218 35.8607   1
   3  -5   1 26.6302 39.2532   1
  -3   5  -1 27.0927 29.5148   4
   3  -5   1 17.0780 32.0958   2
  -3   5  -2 3652.35 180.059   1
   3  -5   2 4084.50 168.197   2
   3  -5   2 3798.05 174.167   1
  -3   5  -3 64667.6 1061.94   2
  -3   5  -3 62523.1 1086.69   1
   3  -5   3 65058.8 1076.48   1
   3  -5   4 77122.6 1252.05   1
  -3   5  -4 77565.6 1263.96   1
  -3   5  -5 13976.9 350.920   3
  -3   5  -5 14097.8 379.637   1
  -3   5  -6 88.3663 37.3531   3
  -3   5  -7 4702.17 198.510   3
  -3   5  -8 3763.50 183.769   3
  -3   5  -9 1364.44 116.630   3
  -3   5 -10 7705.84 296.434   3
  -3   5 -11 4606.13 237.697   3
  -3   5 -12 4106.28 242.148   3
  -3   5 -13 15317.9 511.201   3
  -3   5 -14 5021.88 294.332   3
  -3   5 -15 158.616 72.1509   3
  -3   5 -16 537.634 128.832   4
  -3   5 -16 769.357 138.491   3
  -3   5 -17 153.572 89.4044   3
  -3   5 -17 117.510 79.7423   4
  -3   5 -18-79.9502 97.1644   4
   3  -4 -19 438.328 125.447   1
   3  -4 -18 1913.89 217.986   1
   3  -4 -17 8141.88 428.196   1
   3  -4 -16 13752.0 549.695   1
   3  -4 -15 3083.99 246.633   1
   3  -4 -14 147.918 74.7623   1
   3  -4 -13 1411.96 112.223   4
   3  -4 -13 1624.25 169.841   1
   3  -4 -12 197.924 72.1574   1
   3  -4 -12 196.988 45.3385   4
   3  -4 -11 15939.5 370.497   4
   3  -4 -11 15561.3 513.981   1
   3  -4 -10 47876.1 1012.85   1
   3  -4 -10 48951.0 799.524   4
   3  -4  -9 67135.4 1281.79   1
   3  -4  -9 70938.5 1049.82   4
   3  -4  -8 11011.4 388.198   1
   3  -4  -8 11603.5 237.617   4
   3  -4  -7 175.523 24.8176   4
   3  -4  -7 134.196 59.8456   1
   3  -4  -7 226.684 23.2112   4
   3  -4  -6 65.1080 53.0685   1
   3  -4  -5 8340.39 297.757   1
   3  -4  -4 22488.7 529.092   1
  -3   4   3 57492.0 1005.30   1
   3  -4  -3 57147.0 1002.31   1
  -3   4   2 29855.8 600.692   1
   3  -4  -2 29065.6 595.692   1
  -3   4   2 28659.2 423.394   4
  -3   4   1 2837.39 148.977   1
   3  -4  -1 2452.15 140.041   1
   3  -4   0 32164.7 623.735   1
  -3   4   0 33805.0 635.913   1
  -3   4  -1 13577.9 340.322   1
   3  -4   1 13708.4 303.634   2
   3  -4   1 13599.9 337.330   1
   3  -4   2 171.985 42.0332   2
  -3   4  -2 186.794 45.6380   1
   3  -4   2 164.355 44.4750   1
  -3   4  -2 163.845 31.7515   2
   3  -4   3 4201.65 168.413   1
  -3   4  -3 4447.44 173.549   1
  -3   4  -3 4245.82 162.565   2
  -3   4  -4 197.365 42.7745   2
  -3   4  -4 304.799 49.4841   1
   3  -4   4 149.054 38.8849   1
  -3   4  -4 161.523 41.3243   3
  -3   4  -5 3753.42 161.568   1
  -3   4  -5 3600.28 164.404   2
  -3   4  -5 3552.69 157.761   3
  -3   4  -6 38635.1 726.945   3
  -3   4  -6 39208.2 715.414   1
  -3   4  -7 45284.5 826.740   1
  -3   4  -7 47202.0 848.317   3
  -3   4  -8 2055.51 138.690   1
  -3   4  -8 2422.51 147.222   3
  -3   4  -9 1085.01 106.464   3
  -3   4  -9 987.296 101.645   1
  -3   4 -10 28.9782 55.2153   3
  -3   4 -11 472.139 93.7952   3
  -3   4 -12 6474.39 310.403   3
  -3   4 -13 9634.55 401.046   3
  -3   4 -14 3406.41 249.877   3
  -3   4 -15 1654.24 184.003   3
  -3   4 -16 2189.65 224.715   3
  -3   4 -17 741.001 149.449   3
  -3   4 -18 542.211 130.288   3
   3  -3 -20 2.17486 98.9363   1
   3  -3 -19 55.1680 87.1687   1
   3  -3 -18 1114.90 179.807   1
   3  -3 -17 14342.9 574.359   1
   3  -3 -16 16304.6 602.842   1
   3  -3 -15 3447.88 261.507   1
   3  -3 -14 342.011 99.1157   1
   3  -3 -14 290.462 62.4201   4
   3  -3 -13 2108.30 143.052   4
   3  -3 -13 2211.25 194.128   1
   3  -3 -12 374.059 86.5497   1
   3  -3 -12 507.286 69.7293   4
   3  -3 -11 1700.32 158.592   1
   3  -3 -11 1426.71 105.555   4
   3  -3 -10 17740.7 395.273   4
   3  -3 -10 17104.5 521.359   1
   3  -3  -9 9593.28 248.494   4
   3  -3  -9 9365.74 357.267   1
   3  -3  -8 9742.31 352.696   1
   3  -3  -8 10016.2 235.808   4
   3  -3  -7 37936.3 787.161   1
   3  -3  -7 38179.6 597.859   4
   3  -3  -6 22050.3 355.019   4
   3  -3  -6 21976.8 533.539   1
  -3   3   5 1134.43 103.847   1
   3  -3  -5 1140.65 104.577   1
   3  -3  -5 1075.40 39.4937   4
  -3   3   5 1023.08 95.4013   3
  -3   3   4 2219.14 135.287   1
   3  -3  -4 2123.88 138.950   1
  -3   3   4 2125.72 123.358   3
  -3   3   3 4203.36 182.859   1
   3  -3  -3 4251.70 183.162   1
  -3   3   2 3277.25 154.182   1
  -3   3   2 3027.17 76.7032   4
   3  -3  -2 3067.67 151.685   1
  -3   3   1 125667. 1846.45   1
   3  -3  -1 127383. 1843.01   1
  -3   3   0 151561. 2124.08   1
   3  -3   0 144804. 2114.30   1
   3  -3   0 150790. 2034.91   2
  -3   3  -1 4373.27 132.510   2
  -3   3  -1 4892.21 164.517   1
   3  -3   1 4635.14 160.417   1
   3  -3   1 4596.31 134.505   2
   3  -3   2 2880.70 118.740   1
  -3   3  -2 3016.48 112.732   2
  -3   3  -2 2961.47 123.750   1
   3  -3   3 6261.49 183.725   1
  -3   3  -3 6342.63 201.834   3
  -3   3  -3 6187.56 183.681   1
  -3   3  -4 519.723 63.1277   3
   3  -3   4 252.845 51.7142   1
  -3   3  -4 554.296 54.8058   1
  -3   3  -5 403.752 65.6271   3
  -3   3  -5 608.389 60.8761   1
  -3   3  -6 16279.0 362.955   1
   3  -3   6 16672.8 404.101   3
  -3   3  -6 16539.0 413.524   3
  -3   3  -7 3724.85 161.726   1
  -3   3  -7 4285.88 195.537   3
  -3   3  -8 4851.75 197.879   1
  -3   3  -8 6302.65 248.950   3
  -3   3  -9 4517.15 222.682   3
  -3   3  -9 4004.01 176.314   1
  -3   3 -10 164.453 52.9044   1
  -3   3 -10 259.001 69.6452   3
  -3   3 -11 3395.39 217.190   3
  -3   3 -12 3521.58 234.527   3
  -3   3 -13 145.934 73.1529   3
  -3   3 -14-38.2485 66.3250   3
  -3   3 -15 6689.51 375.277   3
  -3   3 -16 1165.61 167.381   3
  -3   3 -17 779.236 153.671   3
  -3   3 -18 1391.30 195.224   3
  -3   3 -19 159.863 107.646   3
  -3   3 -20 337.516 111.113   3
   3  -2 -20 1562.00 212.386   1
   3  -2 -19 391.549 118.690   1
   3  -2 -18 635.128 139.705   1
   3  -2 -17 2960.78 257.407   1
   3  -2 -16 1929.72 201.467   1
   3  -2 -15 2491.47 220.634   1
   3  -2 -15 2628.30 183.548   4
   3  -2 -14 20221.4 629.796   1
   3  -2 -14 19428.2 527.868   4
   3  -2 -13 21342.2 637.324   1
   3  -2 -13 20482.9 523.899   4
   3  -2 -12 1661.05 164.661   1
   3  -2 -12 1808.28 130.652   4
   3  -2 -11 32.7904 52.9441   1
   3  -2 -11 250.451 54.5416   4
   3  -2 -10 1220.78 135.868   1
   3  -2 -10 1423.78 102.052   4
   3  -2  -9 1571.63 144.196   1
   3  -2  -9 1670.50 103.716   4
   3  -2  -8 20634.8 415.668   4
   3  -2  -8 19096.4 515.901   1
   3  -2  -7 30227.1 660.765   1
   3  -2  -7 30233.0 524.902   4
   3  -2  -6 7448.80 272.765   1
   3  -2  -6 7426.53 185.103   4
  -3   2   6 7657.80 259.209   3
   3  -2  -5 5680.25 224.520   1
   3  -2  -5 5918.50 147.809   4
  -3   2   5 5819.31 210.814   3
  -3   2   4 4836.12 119.784   4
   3  -2  -4 4789.43 197.392   1
   3  -2  -4 4740.40 120.653   4
   3  -2  -3 9631.83 275.436   1
   3  -2  -3 9786.62 190.825   4
  -3   2   3 9473.52 182.557   4
  -3   2   2 6614.03 210.482   1
   3  -2  -2 6583.25 153.339   4
   3  -2  -2 7094.34 218.120   1
  -3   2   2 6723.16 149.541   4
  -3   2   1 1348.43 89.2122   1
   3  -2  -1 1574.91 92.7269   1
  -3   2   1 1360.82 64.9925   4
  -3   2   0 2309.84 106.170   1
   3  -2   0 2483.13 107.604   1
   3  -2   0 2392.36 66.2169   2
  -3   2  -1 1092.34 50.8891   2
  -3   2  -1 945.235 56.7864   1
   3  -2   1 1196.46 68.6472   1
   3  -2   2 15189.0 280.672   1
  -3   2  -2 14394.0 282.814   1
  -3   2  -2 14536.3 327.709   3
   3  -2   3 701.925 46.3573   1
  -3   2  -3 648.271 47.9299   1
  -3   2  -3 549.528 68.6811   3
  -3   2  -4 19367.0 415.705   3
   3  -2   4 18760.9 411.411   3
  -3   2  -4 17933.0 325.110   1
  -3   2  -5 15007.2 371.170   3
   3  -2   5 14500.2 360.824   3
  -3   2  -5 14313.4 278.661   1
  -3   2  -6 3768.40 132.153   1
  -3   2  -6 4463.57 193.035   3
   3  -2   6 4485.78 189.536   3
  -3   2  -7 1198.82 108.765   3
  -3   2  -7 683.634 68.7405   1
  -3   2  -8 3718.25 199.226   3
  -3   2  -9 5645.85 260.192   3
  -3   2 -10-2.54558 54.3126   3
  -3   2 -11 7660.66 342.483   3
  -3   2 -12 1636.20 168.227   3
  -3   2 -13 1824.23 189.305   3
  -3   2 -14 1505.39 124.966   1
  -3   2 -14 1071.75 163.437   3
  -3   2 -15 98.0278 84.4903   3
  -3   2 -16 1065.64 158.566   3
  -3   2 -17 435.654 111.530   3
  -3   2 -18 19.8916 92.2844   3
  -3   2 -19 753.295 166.210   3
  -3   2 -20 4403.19 361.224   3
   3  -1 -20 2501.79 267.003   1
   3  -1 -19 137.905 94.3776   1
   3  -1 -18 64.1329 72.0119   1
   3  -1 -17 44.9272 71.6832   1
   3  -1 -17 27.7408 56.4952   4
   3  -1 -16 395.861 104.758   1
   3  -1 -16 233.591 74.1436   4
   3  -1 -15 525.942 116.355   1
   3  -1 -15 426.898 85.8813   4
   3  -1 -14 6108.72 331.597   1
   3  -1 -14 5862.40 277.310   4
   3  -1 -13 101.553 57.9328   1
   3  -1 -13 79.4185 51.7858   4
   3  -1 -12 5926.44 255.514   4
   3  -1 -12 6244.72 307.727   1
   3  -1 -11 2860.84 208.522   1
   3  -1 -11 3013.63 169.846   4
   3  -1 -10 622.301 96.1718   1
   3  -1 -10 739.855 82.4114   4
   3  -1  -9 13140.3 346.750   4
   3  -1  -8 5170.30 191.502   4
  -3   1   8 5232.23 225.616   3
   3  -1  -7 967.473 75.4421   4
  -3   1   7 998.343 90.5948   3
   3  -1  -6 2714.57 117.314   4
  -3   1   6 2657.76 136.825   3
   3  -1  -5 26244.8 477.026   4
  -3   1   5 27404.2 480.034   4
  -3   1   5 26987.1 517.705   3
  -3   1   4 9332.31 214.965   4
   3  -1  -4 8995.23 217.494   4
   3  -1  -3 7894.04 194.413   4
  -3   1   3 7913.69 188.840   4
  -3   1   2 22082.4 390.747   4
   3  -1  -2 22134.2 398.507   4
   3  -1  -1 37898.1 619.364   1
   3  -1  -1 36815.0 606.923   4
  -3   1   1 36790.0 603.664   4
   3  -1   0 152.352 37.8475   1
  -3   1   0 90.1573 30.4948   4
   3  -1   0 61.1863 36.1918   4
   3  -1   1 7919.41 174.853   1
  -3   1  -1 7587.75 210.603   3
  -3   1  -1 8140.22 224.621   4
   3  -1   2 40074.5 579.154   1
  -3   1  -2 40181.4 679.811   3
  -3   1  -3 1451.23 98.5094   3
   3  -1   3 1299.69 91.2641   3
  -3   1  -4 3362.50 154.768   3
   3  -1   4 3252.54 148.650   3
  -3   1  -5 3840.05 177.803   3
   3  -1   5 3700.29 172.979   3
  -3   1  -6 8053.76 268.565   3
  -3   1  -6 5316.18 138.345   1
  -3   1  -7 21512.7 528.072   3
  -3   1  -8 6053.52 266.442   3
  -3   1  -9 1593.03 86.1715   1
  -3   1  -9 1611.21 144.368   3
  -3   1 -10 1444.57 151.865   3
  -3   1 -10 1638.63 97.0180   1
  -3   1 -11 643.583 68.0376   1
  -3   1 -11 743.821 118.301   3
  -3   1 -12 5097.28 304.156   3
  -3   1 -12 5152.02 201.537   1
  -3   1 -13 18724.4 641.869   3
  -3   1 -13 19612.2 461.410   1
  -3   1 -14 10056.5 464.098   3
  -3   1 -14 10132.1 320.885   1
  -3   1 -15 1120.48 165.954   3
  -3   1 -16 346.038 124.076   3
  -3   1 -17 130.475 101.737   3
  -3   1 -18 2510.12 257.928   3
  -3   1 -19 165.878 98.8595   3
   3   0 -20-0.18613 73.7203   1
   3   0 -19 1369.10 196.644   1
   3   0 -18 3297.56 279.027   1
   3   0 -18 3072.82 242.690   4
   3   0 -17 68.5371 86.9351   1
   3   0 -17 47.6955 62.1813   4
   3   0 -16 4399.02 310.734   1
   3   0 -16 4960.98 287.886   4
   3   0 -15 3735.22 274.865   1
   3   0 -15 3876.38 247.311   4
   3   0 -14 1145.72 131.255   4
   3   0 -13 2989.81 196.635   4
   3   0 -12 9431.43 345.133   4
   3   0 -11 14848.6 429.498   4
   3   0 -10 135.915 52.6149   4
  -3   0   9 22349.1 530.536   3
   3   0  -9 22018.2 507.553   4
   3   0  -8 4965.81 200.906   4
  -3   0   8 5280.28 211.121   3
   3   0  -7 1361.48 100.299   4
  -3   0   7 1473.78 101.659   3
  -3   0   6 391.942 53.1091   3
   3   0  -6 334.098 53.4299   4
  -3   0   6 473.375 57.7850   4
   3   0  -5 7332.31 224.639   4
  -3   0   5 7504.21 220.899   4
  -3   0   5 7406.52 205.113   3
   3   0  -4 2751.45 125.718   4
  -3   0   4 2676.51 119.213   4
  -3   0   3 618.089 57.1417   4
   3   0  -3 647.533 61.4800   4
   3   0  -2 8462.08 225.481   4
  -3   0   2 8088.64 217.491   4
   3   0  -2 7928.60 164.507   2
   3   0  -1 38509.0 656.168   4
  -3   0   1 38309.0 650.241   4
  -3   0   1 38057.4 547.560   2
  -3   0   0 140793. 1947.25   3
  -3   0   0 140492. 1988.27   4
   3   0   0 136607. 1990.69   4
  -3   0  -1 52688.8 831.424   3
   3   0   1 51334.1 820.953   3
  -3   0  -1 52998.8 864.728   4
   3   0   1 51509.3 866.675   4
  -3   0  -2 500.027 63.0833   3
  -3   0  -2 621.236 71.6847   4
   3   0   2 547.764 60.2497   3
  -3   0  -3 5515.77 202.605   3
   3   0   3 6287.47 212.079   3
  -3   0  -3 6189.13 221.543   4
  -3   0  -4 45.4470 48.0961   3
  -3   0  -4 71.3141 38.6967   4
   3   0   4 103.865 40.7318   3
  -3   0  -5 134.930 56.2614   3
   3   0   5 68.2544 45.5776   3
  -3   0  -6 20483.7 506.172   3
  -3   0  -7 37245.3 777.543   3
  -3   0  -7 36377.5 544.653   1
  -3   0  -8 9264.02 348.426   3
  -3   0  -8 8179.94 189.192   1
  -3   0  -9 655.232 54.6344   1
  -3   0  -9 658.638 104.162   3
  -3   0 -10 5813.59 304.629   3
  -3   0 -10 6266.79 187.918   1
  -3   0 -11 10909.1 281.196   1
  -3   0 -11 10217.0 431.665   3
  -3   0 -12 10119.3 450.915   3
  -3   0 -12 10639.6 291.778   1
  -3   0 -13 352.276 106.289   3
  -3   0 -13 183.120 44.0020   1
  -3   0 -14 1342.25 170.807   3
  -3   0 -15 87.2197 93.5299   3
  -3   0 -16 116.371 96.5318   3
  -3   0 -17 9619.45 508.481   3
  -3   0 -18 16022.2 681.322   3
  -3   0 -19 14548.7 670.485   3
   3   1 -20 222.779 121.825   1
   3   1 -19 2105.15 247.853   1
   3   1 -18 4769.35 337.478   1
   3   1 -18 4119.20 295.546   4
   3   1 -17-30.8675 67.7271   4
   3   1 -16 2295.75 201.577   4
   3   1 -15 456.586 98.6552   4
   3   1 -14 1194.66 143.120   4
   3   1 -13 4093.89 239.464   4
   3   1 -12-16.1608 42.3912   4
   3   1 -11 365.930 70.8370   4
   3   1 -10 109.114 45.6580   4
  -3  -1  10 162.259 52.4625   3
  -3  -1   9 583.332 76.4368   3
   3   1  -9 468.833 78.3408   4
   3   1  -8 9663.47 311.723   4
  -3  -1   8 9605.73 280.469   3
   3   1  -7 43787.8 811.632   4
  -3  -1   7 44607.5 751.244   3
  -3  -1   6 25524.0 540.267   4
   3   1  -6 24973.0 536.590   4
  -3  -1   6 26043.3 468.582   3
   3   1  -5 7304.20 236.969   4
  -3  -1   5 7661.35 245.785   4
  -3  -1   5 6935.74 179.678   3
   3   1  -4 372.711 45.9178   2
  -3  -1   4 434.752 56.8641   4
   3   1  -4 401.722 62.0437   4
   3   1  -3 14576.8 345.976   4
  -3  -1   3 14357.6 344.365   4
   3   1  -3 14384.8 297.779   2
  -3  -1   2 8887.32 255.438   4
  -3  -1   2 8804.42 200.046   3
   3   1  -2 8916.87 256.715   4
  -3  -1   2 9198.60 207.781   2
  -3  -1   1 13281.5 323.491   4
  -3  -1   1 12829.9 270.346   3
  -3  -1   1 12730.5 255.693   2
   3   1  -1 12831.5 321.104   4
   3   1   0 10899.5 294.247   4
  -3  -1   0 10172.2 246.740   3
   3   1   0 10504.5 243.928   3
  -3  -1   0 10866.9 292.433   4
  -3  -1  -1 42007.6 721.134   3
   3   1   1 42629.8 716.877   3
  -3  -1  -1 44692.1 772.766   4
   3   1   1 44846.6 777.336   4
  -3  -1  -2 5160.26 186.328   3
   3   1   2 4837.37 134.546   1
   3   1   2 5444.93 189.927   3
   3   1   2 5197.03 215.555   4
  -3  -1  -2 5528.31 209.303   4
  -3  -1  -3 14266.5 376.090   4
  -3  -1  -3 14052.4 358.910   3
   3   1   3 14970.0 365.677   3
   3   1   3 13998.5 248.552   1
  -3  -1  -4 46356.2 837.447   3
   3   1   4 46517.8 837.294   3
  -3  -1  -4 44426.3 833.763   4
   3   1   4 44678.8 646.920   1
   3   1   5 60434.1 836.951   1
  -3  -1  -5 58629.7 833.827   1
  -3  -1  -5 62947.4 1077.45   3
  -3  -1  -6 26040.4 625.273   3
  -3  -1  -6 26955.5 413.596   1
  -3  -1  -7 373.806 86.7530   3
  -3  -1  -7 373.809 34.7031   1
  -3  -1  -8 547.519 105.591   3
  -3  -1  -8 562.048 46.7354   1
  -3  -1  -9 2753.85 209.540   3
  -3  -1  -9 2660.84 109.403   1
  -3  -1 -10 19275.4 612.692   3
  -3  -1 -10 19580.4 393.273   1
  -3  -1 -11 58932.1 1260.30   3
  -3  -1 -11 57065.0 926.277   1
  -3  -1 -12 82520.3 1265.96   1
  -3  -1 -12 77523.6 1602.63   3
  -3  -1 -13 26960.1 811.626   3
  -3  -1 -14 4468.06 318.409   3
  -3  -1 -15 135.095 88.7313   3
  -3  -1 -16 418.044 140.449   3
  -3  -1 -17 6210.44 418.718   3
  -3  -1 -18 17021.7 721.006   3
   3   2 -19 85.1119 81.5173   4
   3   2 -18 82.1806 75.6615   4
   3   2 -17 62.0858 70.5300   4
   3   2 -16 156.158 67.4099   4
   3   2 -15-59.6496 68.6649   4
   3   2 -14 12737.3 473.226   4
   3   2 -13 20824.7 615.445   4
   3   2 -12 2711.09 201.176   4
  -3  -2  11 1316.38 104.411   3
   3   2 -11 1197.87 131.068   4
   3   2 -10 3554.79 206.268   4
  -3  -2  10 3568.44 165.840   3
  -3  -2   9 9470.31 270.495   3
   3   2  -9 9963.70 346.790   4
  -3  -2   8 3358.39 141.472   3
   3   2  -8 3400.24 189.911   4
  -3  -2   7 2758.23 114.754   3
   3   2  -7 2814.19 167.764   4
  -3  -2   6 23209.9 408.724   3
   3   2  -6 24956.9 550.696   4
   3   2  -6 24125.7 512.667   2
   3   2  -5 4511.08 199.794   4
   3   2  -5 4527.53 177.895   2
  -3  -2   5 4235.65 116.185   3
  -3  -2   4 8235.05 171.608   3
   3   2  -4 8752.15 278.781   4
   3   2  -4 8873.26 248.807   2
  -3  -2   4 8751.63 277.206   4
  -3  -2   3 71431.3 1154.44   4
   3   2  -3 69557.1 1155.22   4
  -3  -2   3 70047.5 1003.86   3
  -3  -2   3 72291.6 1090.35   2
  -3  -2   2 115927. 1635.62   3
   3   2  -2 118618. 1775.68   4
  -3  -2   2 119927. 1774.88   4
  -3  -2   2 118774. 1690.09   2
  -3  -2   1 112798. 1604.34   3
   3   2  -1 111010. 1589.04   3
   3   2  -1 114572. 1717.14   4
  -3  -2   1 117752. 1722.89   4
  -3  -2   0 20198.3 406.819   3
   3   2   0 19932.2 396.146   3
  -3  -2   0 21127.0 471.237   4
   3   2   0 21507.0 475.600   4
  -3  -2  -1 74.5064 43.9849   4
  -3  -2  -1 44.9519 33.0166   3
   3   2   1 58.8998 29.3290   3
   3   2   1 56.8521 47.2859   4
   3   2   1 35.8277 26.0020   1
   3   2   2 1046.24 68.7258   1
  -3  -2  -2 1218.51 103.729   4
  -3  -2  -2 1252.92 99.2862   3
   3   2   2 1190.81 93.0774   3
   3   2   2 999.662 97.4019   4
  -3  -2  -3 19630.5 465.825   3
   3   2   3 19554.1 461.034   3
   3   2   3 19859.2 483.299   4
  -3  -2  -3 19691.4 475.488   4
   3   2   3 18676.3 359.808   1
  -3  -2  -4 142028. 2135.52   3
   3   2   4 138744. 1934.76   1
  -3  -2  -5 187208. 2777.04   3
  -3  -2  -5 186216. 2529.78   1
   3   2   5 184620. 2529.70   1
  -3  -2  -6 87641.1 1504.76   3
  -3  -2  -6 88515.6 1244.11   1
   3   2   6 83771.3 1243.79   1
  -3  -2  -7 9382.89 373.420   3
   3   2   7 8775.14 219.053   1
  -3  -2  -7 9535.60 222.808   1
  -3  -2  -8 1619.46 162.780   3
  -3  -2  -8 1371.29 78.6693   1
  -3  -2  -9 420.908 98.1865   3
  -3  -2  -9 475.866 51.6568   1
  -3  -2 -10 7876.82 383.015   3
  -3  -2 -10 7322.31 219.725   1
  -3  -2 -11 40053.8 1011.48   3
  -3  -2 -11 42815.3 738.997   1
  -3  -2 -12 24798.6 774.098   3
  -3  -2 -12 26347.1 531.734   1
  -3  -2 -13 1079.25 174.429   3
  -3  -2 -14 762.755 159.722   3
  -3  -2 -15 1552.97 207.521   3
  -3  -2 -16-21.0135 76.5486   3
  -3  -2 -17 58.3915 96.7459   3
   3   3 -19 2656.81 263.476   4
   3   3 -18 781.040 144.753   4
   3   3 -17 959.924 156.573   4
   3   3 -16 9732.73 452.229   4
   3   3 -15 7369.76 377.161   4
   3   3 -14 531.643 110.070   4
   3   3 -13 1471.36 156.490   4
   3   3 -12 1061.10 135.160   4
   3   3 -11 1519.87 151.065   4
  -3  -3  10 22769.6 428.317   3
   3   3 -10 22869.6 610.380   4
  -3  -3   9 85156.6 1223.80   3
   3   3  -9 86327.0 1487.19   4
  -3  -3   8 103085. 1420.94   3
   3   3  -8 103899. 1708.17   4
   3   3  -7 20214.1 529.777   4
   3   3  -6 1568.48 134.246   4
   3   3  -5 97.7916 50.9770   4
  -3  -3   4 19094.7 300.515   3
   3   3  -4 18296.7 476.501   4
  -3  -3   3 64493.0 932.772   3
   3   3  -3 64358.4 1118.51   4
  -3  -3   3 66158.3 1056.17   2
  -3  -3   2 194314. 2672.59   3
   3   3  -2 196853. 2840.75   4
  -3  -3   2 198205. 2755.71   2
  -3  -3   1 103368. 1507.33   3
   3   3  -1 102536. 1473.33   3
   3   3  -1 103717. 1622.86   4
  -3  -3   0 4553.93 177.455   3
   3   3   0 4471.58 162.912   3
   3   3   0 4738.64 187.826   1
   3   3   0 4638.56 209.483   4
  -3  -3  -1 5105.02 202.135   3
   3   3   1 5085.54 189.400   1
   3   3   1 4878.02 189.107   3
   3   3   1 5082.11 225.401   4
  -3  -3  -2 2470.57 145.922   3
   3   3   2 2361.75 138.940   3
   3   3   2 2487.63 158.767   4
   3   3   2 2280.84 118.429   1
  -3  -3  -3 6111.85 253.852   3
   3   3   3 6116.24 253.596   4
   3   3   3 5918.67 193.485   1
   3   3   4 36945.2 765.512   4
  -3  -3  -4 35326.0 765.633   3
   3   3   4 35270.6 628.068   1
  -3  -3  -5 26293.4 662.247   3
  -3  -3  -5 27427.8 506.732   1
   3   3   5 26025.6 503.039   1
  -3  -3  -6 6458.77 308.793   3
  -3  -3  -6 6362.54 199.313   1
   3   3   6 6138.83 196.044   1
  -3  -3  -7 5088.46 281.661   3
  -3  -3  -7 4940.63 173.375   1
   3   3   7 4836.19 174.102   1
  -3  -3  -8 12939.4 487.041   3
   3   3   8 12893.0 317.604   1
  -3  -3  -8 13237.3 318.282   1
  -3  -3  -9 194.895 87.6810   3
  -3  -3  -9 123.458 36.0449   1
  -3  -3 -10 1327.46 172.802   3
  -3  -3 -10 1311.08 95.9266   1
  -3  -3 -11 1405.85 174.390   3
  -3  -3 -11 1269.02 95.8038   1
  -3  -3 -12 218.218 104.951   3
  -3  -3 -13 2150.26 234.141   3
  -3  -3 -14 10182.0 506.869   3
  -3  -3 -15 2278.86 251.534   3
  -3  -3 -16 555.455 149.458   3
  -3  -3 -17 323.278 114.894   3
   3   4 -19 62.5950 80.3867   4
   3   4 -18 56.6828 79.9292   4
   3   4 -17 4688.13 334.270   4
   3   4 -16 27449.0 833.292   4
   3   4 -15 24846.1 766.980   4
   3   4 -14 11426.2 483.233   4
   3   4 -13 919.177 139.363   4
   3   4 -12 25.7982 54.0310   4
   3   4 -11 1439.06 150.914   4
   3   4 -10 16903.3 538.416   4
   3   4  -9 66517.7 1269.25   4
   3   4  -8 41894.6 902.007   4
   3   4  -7 652.204 103.631   4
   3   4  -6 700.287 97.7640   4
   3   4  -5 5557.77 255.445   4
   3   4  -4 3783.22 209.715   4
  -3  -4   4 3995.05 189.986   2
   3   4  -3 8091.15 304.426   4
  -3  -4   3 8215.45 273.048   2
  -3  -4   3 8165.11 187.787   3
  -3  -4   2 32871.0 574.136   3
   3   4  -2 32642.0 538.321   3
   3   4  -2 33852.2 718.865   4
  -3  -4   2 33353.9 659.682   2
  -3  -4   1 318.469 52.6485   3
   3   4  -1 345.623 45.5714   3
   3   4  -1 396.373 72.6051   4
  -3  -4   0 24128.0 523.510   3
   3   4   0 24304.8 492.412   3
   3   4   0 24264.7 579.185   4
   3   4   1 25256.9 538.675   1
  -3  -4  -1 24984.4 557.808   3
   3   4   1 24281.4 527.282   3
   3   4   1 25062.6 594.401   4
   3   4   2 10732.7 333.603   3
   3   4   2 10948.7 368.645   4
   3   4   2 11016.0 315.522   1
  -3  -4  -2 11179.0 361.584   3
  -3  -4  -3 373.393 81.5836   3
   3   4   3 584.798 91.0182   4
   3   4   3 397.202 56.5034   1
   3   4   4 812.932 77.5609   1
  -3  -4  -4 852.433 113.066   3
   3   4   4 736.247 99.9312   4
   3   4   5 855.319 80.5348   1
  -3  -4  -5 1031.00 90.7057   1
  -3  -4  -5 965.221 124.016   3
   3   4   5 793.280 111.174   4
  -3  -4  -6 2919.30 213.139   3
  -3  -4  -6 2766.80 145.286   1
   3   4   6 2619.06 142.515   1
  -3  -4  -7 18873.1 585.061   3
  -3  -4  -7 18112.4 430.648   1
   3   4   7 17885.0 425.815   1
  -3  -4  -8 7073.30 248.330   1
   3   4   8 7047.17 245.812   1
  -3  -4  -8 7111.38 360.561   3
  -3  -4  -9 115.391 76.9398   3
  -3  -4  -9 159.352 43.5406   1
  -3  -4 -10 165.594 89.4743   3
  -3  -4 -10 121.215 49.1605   1
  -3  -4 -11 185.195 95.1776   3
  -3  -4 -11 62.4176 36.8701   1
  -3  -4 -12 3222.34 270.741   3
  -3  -4 -13 1223.35 183.213   3
  -3  -4 -14 720.641 152.727   3
  -3  -4 -15-144.875 112.639   3
  -3  -4 -16 677.065 165.848   3
   3   5 -18 216.358 108.573   4
   3   5 -17 2583.10 252.748   4
   3   5 -16 10539.4 505.133   4
   3   5 -15 7902.33 421.727   4
   3   5 -14 538.144 117.316   4
   3   5 -13 5331.78 320.700   4
   3   5 -12 8192.02 399.155   4
   3   5 -11 508.134 107.213   4
   3   5 -10 2353.93 200.137   4
   3   5  -9 3574.61 240.950   4
   3   5  -8 142.446 64.8155   4
   3   5  -7 4608.33 260.988   4
   3   5  -6 41201.2 895.029   4
   3   5  -5 14255.0 454.601   4
  -3  -5   4 67.9325 43.9176   2
   3   5  -4 6.31219 47.5477   4
  -3  -5   3 262.492 61.4439   2
  -3  -5   3 166.913 26.4986   3
   3   5  -3 124.428 56.3647   4
   3   5  -2 2487.70 107.078   3
   3   5  -2 2769.57 182.530   4
  -3  -5   2 2434.22 156.604   2
  -3  -5   2 2700.80 121.491   3
   3   5  -1 289.148 45.4708   3
  -3  -5   1 308.234 51.9127   3
   3   5  -1 216.139 64.5293   4
   3   5   0 5879.31 217.152   3
   3   5   0 6062.96 274.553   4
  -3  -5   0 6317.71 235.257   3
   3   5   1 12713.3 363.015   3
   3   5   1 12958.2 418.135   4
  -3  -5  -1 12929.1 379.883   3
   3   5   2 1101.46 121.786   4
  -3  -5  -2 1112.09 115.926   3
   3   5   3 3583.06 214.336   4
  -3  -5  -3 3618.32 212.811   3
  -3  -5  -4 773.679 109.043   3
   3   5   4 769.014 109.570   4
  -3  -5  -5 23462.1 551.465   1
   3   5   5 24487.5 636.128   4
  -3  -5  -5 24049.8 657.037   3
  -3  -5  -6 9752.81 321.598   1
  -3  -5  -6 9847.63 410.419   3
  -3  -5  -7 1115.89 109.441   1
  -3  -5  -7 1076.57 145.468   3
  -3  -5  -8 882.273 140.093   3
  -3  -5  -8 774.638 96.4028   1
  -3  -5  -9 51.9334 41.2085   1
  -3  -5  -9 216.508 102.275   3
  -3  -5 -10 652.476 90.0960   1
  -3  -5 -10 837.992 148.505   3
  -3  -5 -11 3606.32 295.871   3
  -3  -5 -12 11611.9 543.719   3
  -3  -5 -13 3524.38 304.503   3
  -3  -5 -14 158.098 95.1176   3
  -3  -5 -15 134.888 101.676   3
   3   6 -16 522.949 123.015   4
   3   6 -15 1261.74 184.137   4
   3   6 -14 1051.53 161.065   4
   3   6 -13 9847.29 469.469   4
   3   6 -12 3963.58 286.776   4
   3   6 -11-31.4838 66.7806   4
   3   6 -10 19.6400 66.7172   4
   3   6  -9 1074.96 142.129   4
   3   6  -8 6651.28 342.480   4
   3   6  -7 279.138 84.7573   4
   3   6  -6 3864.65 242.783   4
  -3  -6   5 140.154 55.9103   2
   3   6  -5 184.800 72.5232   4
  -3  -6   4 1922.46 155.169   2
   3   6  -4 1904.95 164.905   4
  -3  -6   3 406.949 78.2602   2
   3   6  -3 322.826 34.8509   3
   3   6  -3 326.229 78.3752   4
   3   6  -2 15602.3 338.120   3
   3   6  -2 15684.3 491.666   4
  -3  -6   2 14675.8 452.433   2
  -3  -6   2 15886.2 351.850   3
   3   6  -1 22255.3 479.162   3
   3   6  -1 23855.4 626.744   4
  -3  -6   1 23565.7 590.818   2
  -3  -6   1 24296.5 509.701   3
   3   6   0 8752.38 354.310   4
   3   6   0 8599.50 283.697   3
  -3  -6   0 9366.00 304.261   3
  -3  -6  -1-7.24290 42.0171   3
   3   6   1 54.7836 59.5948   4
   3   6   2 1761.13 161.029   4
  -3  -6  -2 1823.99 148.917   3
   3   6   3 3044.22 208.983   4
  -3  -6  -3 3538.44 218.852   3
  -3  -6  -4 3002.84 212.739   3
   3   6   4 2754.31 196.311   4
   3   6   5 15466.1 518.426   4
  -3  -6  -5 16095.1 534.168   3
  -3  -6  -6 7873.46 307.640   1
   3   6   6 8410.07 363.865   4
  -3  -6  -6 7804.69 377.996   3
  -3  -6  -7 970.097 110.370   1
  -3  -6  -7 1120.36 151.328   3
  -3  -6  -8 895.264 112.256   1
  -3  -6  -8 834.025 143.019   3
  -3  -6  -9 60.8404 51.2085   1
  -3  -6  -9 95.8431 81.1242   3
  -3  -6 -10 1230.95 180.189   3
  -3  -6 -11 215.900 99.3833   3
  -3  -6 -12 668.288 155.470   3
  -3  -6 -13 1143.15 192.149   3
  -3  -6 -14 2857.20 298.990   3
   3   7 -15 2675.65 268.456   4
   3   7 -14 749.008 144.381   4
   3   7 -13-14.6383 81.4405   4
   3   7 -12 436.675 111.080   4
   3   7 -11 2815.61 254.206   4
   3   7 -10 972.362 152.148   4
   3   7  -9 7085.51 377.046   4
   3   7  -8 17485.1 594.905   4
   3   7  -7 9490.06 414.993   4
   3   7  -6 435.343 101.019   4
   3   7  -5 1294.17 145.914   4
  -3  -7   5 1186.81 134.073   2
   3   7  -4 2911.45 216.947   4
  -3  -7   4 2812.84 201.604   2
  -3  -7   3 5.20601 50.2441   2
   3   7  -3-6.24386 52.1128   4
   3   7  -2 5031.41 280.662   4
  -3  -7   2 4641.98 255.994   2
   3   7  -1 8867.55 374.017   4
   3   7  -1 8335.72 268.805   3
  -3  -7   1 8363.10 350.913   2
  -3  -7   1 9023.48 284.396   3
   3   7   0 268.822 84.0055   4
  -3  -7   0 144.385 45.9717   3
   3   7   1 6696.72 322.487   4
  -3  -7  -1 6778.25 282.734   3
  -3  -7  -2 508.669 89.3281   3
   3   7   2 420.772 86.6137   4
   3   7   3 37.1261 55.9194   4
  -3  -7  -3 159.224 66.0276   3
   3   7   4 2212.69 189.842   4
  -3  -7  -4 2329.71 193.269   3
  -3  -7  -5 320.919 93.4919   3
   3   7   5 112.537 61.0410   4
  -3  -7  -6 337.092 103.356   3
   3   7   6 287.764 78.1444   4
  -3  -7  -7 8958.96 356.009   1
  -3  -7  -7 8469.81 419.835   3
  -3  -7  -8 12193.0 424.551   1
  -3  -7  -8 12253.4 521.914   3
  -3  -7  -9 946.141 164.045   3
  -3  -7 -10-7.49509 81.5511   3
  -3  -7 -11 215.615 98.9554   3
  -3  -7 -12 46.8638 84.6297   3
  -3  -7 -13 338.033 122.729   3
   3   8 -13 656.201 156.908   4
   3   8 -12-3.55263 68.8464   4
   3   8 -11 636.488 123.623   4
   3   8 -10 1684.56 201.141   4
   3   8  -9 420.173 113.654   4
   3   8  -8 1376.35 168.698   4
   3   8  -7 523.073 114.778   4
   3   8  -6 4327.00 291.734   4
   3   8  -5 5346.15 316.535   4
  -3  -8   5 5932.87 315.445   2
  -3  -8   4 299.408 81.5552   2
   3   8  -4 140.163 77.2752   4
   3   8  -3 3899.66 263.001   4
  -3  -8   3 3871.44 247.705   2
   3   8  -2 322.812 94.4446   4
  -3  -8   2 219.244 74.1458   2
   3   8  -1-11.8082 59.8099   4
  -3  -8   1 72.7960 63.2738   2
   3   8   0 7178.89 352.935   4
  -3  -8   0 7165.04 281.222   3
   3   8   1 14766.0 524.807   4
  -3  -8  -1 15031.7 456.096   3
   3   8   2 10422.0 433.535   4
  -3  -8  -2 10210.2 387.947   3
  -3  -8  -3 153.201 67.8675   3
   3   8   3 52.9485 57.5935   4
   3   8   4 451.651 101.061   4
  -3  -8  -4 140.015 62.1452   3
   3   8   5 3764.16 268.987   4
  -3  -8  -5 3497.41 253.962   3
   3   8   6 5834.07 331.300   4
  -3  -8  -6 5549.51 333.189   3
  -3  -8  -7 447.679 114.092   3
  -3  -8  -8 1024.25 166.163   3
  -3  -8  -8 1128.63 139.744   1
  -3  -8  -9 373.095 118.053   3
  -3  -8 -10 392.181 128.527   3
  -3  -8 -11 3557.61 311.876   3
  -3  -8 -12 17703.3 734.576   3
   3   9 -12 4554.62 349.784   4
   3   9 -11 243.460 103.955   4
   3   9 -10 53.4046 85.5348   4
   3   9  -9-5.00539 89.5776   4
   3   9  -8 336.872 110.750   4
   3   9  -7 349.887 110.694   4
   3   9  -6 8650.09 434.889   4
   3   9  -5 6468.88 370.952   4
  -3  -9   5 6635.60 358.660   2
  -3  -9   4 326.383 94.1620   2
   3   9  -4 318.924 99.5840   4
  -3  -9   3 1053.28 140.178   2
   3   9  -3 1201.59 159.334   4
   3   9  -2 6767.73 363.860   4
  -3  -9   2 6683.81 354.040   2
  -3  -9   1 12992.4 504.960   2
   3   9  -1 12474.0 505.337   4
  -3  -9   0 9438.15 426.248   2
   3   9   0 9394.64 430.179   4
  -3  -9  -1-8.16398 44.6947   3
   3   9   1-40.3388 63.2396   4
  -3  -9  -2-36.4781 53.2791   3
   3   9   2 20.4013 63.0459   4
  -3  -9  -3 102.667 60.1609   3
   3   9   3 179.129 77.3771   4
   3   9   4 10261.5 452.596   4
  -3  -9  -4 9931.83 429.368   3
   3   9   5 40511.6 1029.55   4
  -3  -9  -5 40861.1 1006.83   3
   3   9   6 51363.1 1194.47   4
  -3  -9  -6 49863.4 1186.07   3
  -3  -9  -7 27195.5 836.524   3
  -3  -9  -8 5378.27 360.076   3
  -3  -9  -9 155.708 81.3304   3
  -3  -9 -10 1005.35 170.949   3
  -3  -9 -11 8550.39 498.835   3
   3  10  -9 6970.30 427.166   4
   3  10  -8 21949.4 772.119   4
   3  10  -7 20707.4 737.783   4
   3  10  -6 3482.10 291.042   4
  -3 -10   5 41.2898 69.6694   2
   3  10  -5 192.158 95.6381   4
  -3 -10   4 520.699 111.207   2
   3  10  -4 447.185 122.719   4
   3  10  -3 9387.93 460.259   4
  -3 -10   3 8948.20 436.162   2
   3  10  -2 35093.7 958.408   4
  -3 -10   2 34115.4 935.411   2
   3  10  -1 65089.7 1409.21   4
  -3 -10   1 62758.8 1389.97   2
   3  10   0 41253.0 1053.18   4
  -3 -10   0 40447.9 1047.03   2
   3  10   1 9838.91 463.387   4
  -3 -10  -1 9078.22 445.997   2
   3  10   2 214.260 87.7857   4
   3  10   3 753.347 143.685   4
   3  10   4 5959.71 357.532   4
  -3 -10  -4 5802.76 334.211   3
   3  10   5 26652.4 824.782   4
  -3 -10  -5 26854.2 799.974   3
   3  10   6 28663.9 863.586   4
  -3 -10  -6 27716.5 846.970   3
  -3 -10  -7 14032.4 593.415   3
  -3 -10  -8 420.580 125.142   3
  -3 -10  -9 76.8591 80.5805   3
   3  11  -6 10025.9 512.292   4
  -3 -11   5 633.672 140.336   2
   3  11  -5 620.215 140.440   4
  -3 -11   4 446.899 121.003   2
   3  11  -4 738.326 138.642   4
  -3 -11   3 1409.71 184.734   2
   3  11  -3 1403.22 196.176   4
  -3 -11   2 13462.4 572.139   2
   3  11  -2 12753.7 565.145   4
   3  11  -1 25406.5 825.359   4
  -3 -11   1 25497.3 827.686   2
   3  11   0 11175.2 526.795   4
  -3 -11   0 10973.2 519.870   2
   3  11   1 168.772 91.1267   4
  -3 -11  -1 145.964 77.6279   2
   3  11   2 1155.50 177.466   4
  -3 -11  -2 915.654 168.628   2
   3  11   3 1568.63 202.556   4
   3  11   4-82.2154 86.5388   4
   3  11   5 699.069 144.728   4
   3  11   6 2570.37 258.019   4
  -3 -11  -7-0.68544 88.9005   3
  -3 -11  -8 1143.34 182.117   3
   3  12  -2 506.750 141.541   4
   3  12  -1 429.084 116.673   4
   3  12   0-78.2295 82.7935   4
   3  12   1 2428.74 258.366   4
   3  12   2 2264.77 249.825   4
   3  12   3-55.5841 76.1182   4
   3  12   4 183.990 100.999   4
   4 -14  -3-10.9982 76.3149   2
   4 -14  -2 389.293 133.148   1
   4 -14  -2 442.536 124.227   2
   4 -14  -1 27.5277 88.7923   1
   4 -14  -1 60.8464 64.4655   2
   4 -14   0 2103.75 256.193   1
   4 -14   0 2598.14 257.514   2
   4 -14   1 4100.84 342.032   1
   4 -14   1 3792.95 306.893   2
   4 -14   2 245.946 94.2026   2
   4 -14   2 143.981 85.2800   1
   4 -14   3 317.711 116.500   2
  -4  14  -3 298.773 93.8745   4
   4 -14   4-49.6243 65.2929   2
  -4  14  -4-52.3285 74.8867   4
  -4  14  -5 94.3048 68.5242   4
  -4  14  -6 4394.93 314.059   4
  -4  14  -7 9988.78 489.396   4
  -4  14  -8 6917.86 412.629   4
   4 -13  -8-41.8509 87.1896   1
   4 -13  -7 4868.58 364.149   1
   4 -13  -6 8247.97 475.672   1
   4 -13  -5 3552.59 308.041   1
   4 -13  -4-0.36658 83.1901   1
   4 -13  -3 73.3281 93.9533   1
   4 -13  -2 39.8673 78.1614   1
   4 -13  -2-13.2236 64.6768   2
   4 -13  -1 2952.71 279.083   1
   4 -13  -1 2615.75 244.745   2
   4 -13   0 15413.6 649.395   1
   4 -13   0 14850.0 598.727   2
   4 -13   1 12819.8 586.611   1
  -4  13  -1 13390.5 472.293   4
   4 -13   1 12564.9 540.425   2
   4 -13   2 1069.70 158.855   2
   4 -13   2 1004.71 167.765   1
  -4  13  -2 1380.39 152.838   4
   4 -13   3 35.1223 69.0217   2
  -4  13  -3 114.749 76.2082   4
   4 -13   3-55.0025 100.670   1
   4 -13   4 72.3373 78.7020   2
  -4  13  -4 44.3041 55.7954   4
  -4  13  -5 38.7890 59.3671   4
  -4  13  -6 220.049 88.9349   4
  -4  13  -7 6223.08 364.635   4
  -4  13  -8 2443.72 232.923   4
  -4  13  -9 379.191 102.687   4
  -4  13 -10 41.2147 80.0463   4
   4 -12 -11 420.995 129.111   1
   4 -12 -10 5.73120 83.3396   1
   4 -12  -9 87.5693 85.7433   1
   4 -12  -8 725.476 148.558   1
   4 -12  -7 6969.03 422.525   1
   4 -12  -6 11864.4 552.085   1
   4 -12  -5 3413.03 291.285   1
   4 -12  -4 63.9490 83.3578   1
   4 -12  -3 708.810 146.895   1
   4 -12  -2 594.086 130.444   1
   4 -12  -2 204.192 82.7537   2
   4 -12  -1 261.938 109.507   1
  -4  12   1 304.649 64.8983   4
   4 -12  -1 295.351 97.1428   2
   4 -12   0 1947.65 215.428   1
  -4  12   0 1857.43 154.421   4
   4 -12   0 1826.07 194.879   2
   4 -12   1 1847.34 216.225   1
  -4  12  -1 2250.07 180.112   4
   4 -12   1 1972.04 201.315   2
   4 -12   2 67.9265 56.6856   2
  -4  12  -2 60.7344 50.7965   4
   4 -12   2 93.7353 77.2023   1
   4 -12   3 327.534 93.5044   2
   4 -12   3 470.926 125.576   1
  -4  12  -3 461.535 98.8743   4
   4 -12   4 137.575 69.7214   2
   4 -12   4 240.478 99.7119   1
  -4  12  -4 51.7070 49.1764   4
  -4  12  -5 3908.59 260.670   4
  -4  12  -6 1160.66 146.609   4
  -4  12  -7 613.215 115.367   4
  -4  12  -8 2441.23 229.705   4
  -4  12  -9 1051.53 160.658   4
  -4  12 -10 29.1846 70.7409   4
  -4  12 -11 541.562 135.595   4
   4 -11 -13 2643.46 270.927   1
   4 -11 -12 259.454 106.625   1
   4 -11 -11-25.8698 92.4442   1
   4 -11 -10 229.949 99.1866   1
   4 -11  -9 209.410 92.3523   1
   4 -11  -8 1071.90 165.347   1
   4 -11  -7 6.57011 79.1665   1
   4 -11  -6 1299.89 177.179   1
   4 -11  -5-12.3080 72.2181   1
   4 -11  -4 2284.89 222.739   1
   4 -11  -3 2.76008 69.2372   1
  -4  11   2 2171.61 144.426   4
   4 -11  -2 1834.12 196.369   1
   4 -11  -1 409.605 109.817   1
  -4  11   1 495.806 75.8859   4
   4 -11  -1 387.239 97.4633   2
   4 -11   0 265.488 100.582   1
  -4  11   0 219.988 62.5534   4
   4 -11   0 115.697 65.6515   2
   4 -11   1 14529.2 561.883   1
  -4  11  -1 15223.3 455.996   4
   4 -11   1 14478.9 517.782   2
   4 -11   2 6190.71 356.888   1
  -4  11  -2 6382.16 290.231   4
   4 -11   2 5675.75 312.573   2
   4 -11   3-53.8186 71.1242   2
   4 -11   3 12.6893 70.0331   1
  -4  11  -3 4.21562 39.0817   4
   4 -11   4 1302.16 153.757   2
   4 -11   4 1065.49 156.833   1
  -4  11  -4 1125.41 131.446   4
  -4  11  -5 492.701 90.9228   4
  -4  11  -6 5483.39 311.309   4
  -4  11  -7 28182.2 646.661   3
  -4  11  -7 27880.3 773.108   4
  -4  11  -8 41738.9 1022.65   4
  -4  11  -9 22844.6 727.728   4
  -4  11 -10 3134.51 265.990   4
  -4  11 -11 57.3494 81.7518   4
  -4  11 -12 252.861 98.0079   4
  -4  11 -13 10506.4 532.768   4
   4 -10 -14 91.5925 92.2526   1
   4 -10 -13 1110.36 175.045   1
   4 -10 -12 48.9616 76.2964   1
   4 -10 -11 46.7116 78.5452   1
   4 -10 -10 951.595 154.842   1
   4 -10  -9-19.4791 76.7732   1
   4 -10  -8 821.955 146.982   1
   4 -10  -7 3330.06 264.171   1
   4 -10  -6 21562.5 699.702   1
   4 -10  -5 20337.4 666.772   1
  -4  10   4 5317.83 190.820   4
   4 -10  -4 5022.06 311.438   1
   4 -10  -3 200.980 85.4548   1
  -4  10   3 193.234 46.5280   4
   4 -10  -2 387.954 98.8888   1
  -4  10   2 361.897 59.7385   4
   4 -10  -1 6681.12 321.293   2
  -4  10   1 7564.46 266.505   4
   4 -10  -1 7189.89 364.464   1
   4 -10   0 57770.3 1250.40   1
  -4  10   0 61580.6 1071.67   4
   4 -10   0 57400.5 1179.16   2
  -4  10  -1 96200.0 1570.90   4
   4 -10   1 96449.5 1769.71   1
   4 -10   1 93067.0 1676.55   2
   4 -10   2 70060.8 1401.82   1
  -4  10  -2 68945.7 1228.09   4
   4 -10   2 66199.7 1302.69   2
   4 -10   3 19878.5 626.245   1
  -4  10  -3 18764.0 531.032   4
   4 -10   3 19008.2 574.744   2
  -4  10  -4 1208.40 131.145   4
   4 -10   4 979.195 141.600   1
   4 -10   4 1357.53 148.018   2
   4 -10   5 233.835 91.2536   1
  -4  10  -5 201.001 77.5642   4
  -4  10  -6 13809.3 492.410   4
  -4  10  -7 71370.4 1249.43   3
  -4  10  -7 72750.5 1413.30   4
  -4  10  -8 91556.9 1502.91   3
  -4  10  -8 86743.4 1667.10   4
  -4  10  -9 27119.6 629.995   3
  -4  10  -9 25945.5 759.304   4
  -4  10 -10 4872.33 316.340   4
  -4  10 -11 482.508 111.429   4
  -4  10 -12 89.1530 80.8880   4
  -4  10 -13 1039.36 165.988   4
  -4  10 -14 7174.21 438.278   4
   4  -9 -16 334.732 111.998   1
   4  -9 -15 257.730 107.548   1
   4  -9 -14 1873.72 225.009   1
   4  -9 -13 13845.4 590.606   1
   4  -9 -12 26129.6 823.547   1
   4  -9 -11 7299.80 405.277   1
   4  -9 -10 798.753 141.372   1
   4  -9  -9 101.483 66.3823   1
   4  -9  -8 5203.18 320.432   1
   4  -9  -7 45385.0 1073.15   1
   4  -9  -6 89556.4 1699.75   1
   4  -9  -5 90290.7 1703.91   1
  -4   9   5 91820.0 1314.79   4
  -4   9   4 48298.1 772.545   4
   4  -9  -4 45483.2 1061.02   1
   4  -9  -3 429.338 96.4524   1
  -4   9   3 392.534 51.4205   4
  -4   9   2 217.177 37.3355   4
   4  -9  -2 255.532 81.5905   1
  -4   9   1 10813.7 306.879   4
   4  -9  -1 10774.5 430.837   1
  -4   9   0 69902.4 1152.62   4
   4  -9   0 67755.7 1267.18   2
   4  -9   0 68156.4 1346.04   1
   4  -9   1 92199.7 1696.68   1
  -4   9  -1 99573.5 1540.23   4
   4  -9   1 93194.2 1626.06   2
   4  -9   2 44005.0 981.957   1
  -4   9  -2 43720.9 858.619   4
   4  -9   2 43698.0 918.445   2
   4  -9   3 14744.2 505.002   1
  -4   9  -3 14615.6 433.632   4
   4  -9   3 13521.4 447.430   2
   4  -9   4 2437.46 196.536   1
  -4   9  -4 2241.08 166.795   4
   4  -9   4 2335.34 176.967   2
   4  -9   5 195.773 73.2791   1
  -4   9  -5 202.384 56.7521   4
  -4   9  -6 972.019 102.878   3
  -4   9  -6 879.288 118.155   4
  -4   9  -7 3733.39 199.889   3
  -4   9  -7 3640.84 239.887   4
  -4   9  -8 17193.0 469.873   3
  -4   9  -8 17022.5 560.946   4
  -4   9  -9 1257.17 118.872   3
  -4   9  -9 1219.68 155.576   4
  -4   9 -10 99.2978 60.1063   4
  -4   9 -10 160.109 63.0051   3
  -4   9 -11 442.980 86.0216   3
  -4   9 -11 546.096 110.529   4
  -4   9 -12 3935.64 293.102   4
  -4   9 -13 5298.11 356.025   4
  -4   9 -14-2.41157 65.3348   4
  -4   9 -15 451.672 126.588   4
   4  -8 -17 545.611 143.238   1
   4  -8 -16-25.6530 69.1452   1
   4  -8 -15 2684.09 262.006   1
   4  -8 -14 12321.5 551.360   1
   4  -8 -13 40840.7 1066.71   1
   4  -8 -12 49417.4 1183.08   1
   4  -8 -11 23710.8 742.966   1
   4  -8 -10 1845.82 199.854   1
   4  -8  -9 7.52704 60.5186   1
   4  -8  -8 2253.98 204.171   1
   4  -8  -7 21677.3 655.795   1
   4  -8  -6 58078.2 1212.95   1
   4  -8  -5 36741.0 882.650   1
  -4   8   4 6716.30 168.929   4
   4  -8  -4 6533.67 324.661   1
  -4   8   3 19.6869 18.6288   4
   4  -8  -3 61.1930 50.2589   1
  -4   8   2 1481.60 88.1923   4
   4  -8  -2 1719.97 162.274   1
  -4   8   1 3263.26 144.941   4
   4  -8  -1 3136.05 209.991   1
   4  -8   0 776.072 111.416   1
  -4   8   0 714.351 76.8048   4
   4  -8   0 782.377 97.6669   2
  -4   8  -1 5223.23 211.579   4
   4  -8   1 4897.15 235.223   2
   4  -8   1 5184.52 267.736   1
   4  -8   2 4851.75 261.892   1
  -4   8  -2 5154.40 220.581   4
   4  -8   2 4941.39 236.863   2
   4  -8   3 2926.42 198.858   1
  -4   8  -3 2483.80 159.241   4
   4  -8   3 2831.69 181.773   2
   4  -8   4 810.244 112.516   1
  -4   8  -4 617.154 85.6231   4
   4  -8   5 13483.5 448.498   1
  -4   8  -5 13319.1 426.493   4
  -4   8  -6 4899.78 219.562   3
  -4   8  -6 4981.65 261.133   4
  -4   8  -7 1712.89 162.097   4
  -4   8  -7 1854.40 134.232   3
  -4   8  -8 93.2612 44.6722   3
  -4   8  -8 149.326 70.5129   4
  -4   8  -9 701.737 91.7985   3
  -4   8  -9 762.809 123.222   4
  -4   8 -10 2379.21 168.449   3
  -4   8 -10 2371.70 208.658   4
  -4   8 -11 1311.02 129.389   3
  -4   8 -11 1565.88 179.503   4
  -4   8 -12 3132.94 204.723   3
  -4   8 -12 3437.90 270.213   4
  -4   8 -13 606.930 100.091   3
  -4   8 -13 952.526 162.616   4
  -4   8 -14 2576.79 257.031   4
  -4   8 -15 2796.77 269.117   4
  -4   8 -16 535.233 133.397   4
   4  -7 -18 10283.9 541.308   1
   4  -7 -17 298.073 106.422   1
   4  -7 -16 563.459 138.775   1
   4  -7 -15-22.4583 86.6547   1
   4  -7 -14 1098.15 162.768   1
   4  -7 -13 10022.1 466.665   1
   4  -7 -12 9178.66 434.690   1
   4  -7 -11 143.243 74.0061   1
   4  -7 -10-20.3489 66.5562   1
   4  -7  -9-23.4213 59.3579   1
   4  -7  -8 2866.71 217.671   1
   4  -7  -7 16145.8 533.309   1
   4  -7  -6 3636.33 236.920   1
   4  -7  -5 613.052 107.056   1
  -4   7   4 4911.98 107.179   4
   4  -7  -4 4953.69 262.586   1
   4  -7  -3 265.439 75.6620   1
  -4   7   3 383.518 32.9821   4
   4  -7  -2 2155.07 168.397   1
  -4   7   2 2503.77 103.894   4
  -4   7   1 12872.3 297.392   4
   4  -7  -1 12897.7 424.560   1
  -4   7   0 7058.48 220.812   4
   4  -7   0 6955.43 259.142   2
   4  -7   0 6920.82 295.752   1
   4  -7   1 445.771 82.8463   1
  -4   7  -1 424.233 57.6313   4
   4  -7   1 404.473 65.6442   2
  -4   7  -2 4291.94 190.060   4
   4  -7   2 3768.27 189.289   2
   4  -7   2 4094.23 219.783   1
   4  -7   3 1148.49 118.930   1
  -4   7  -3 1289.50 110.588   4
   4  -7   3 1151.79 108.954   2
   4  -7   4 3480.10 201.079   1
  -4   7  -4 3227.68 181.534   4
   4  -7   5 2333.50 164.255   1
  -4   7  -5 2089.55 152.873   4
  -4   7  -6 113.137 48.4203   3
  -4   7  -6 130.548 54.3397   4
  -4   7  -7 4713.29 218.891   3
  -4   7  -8 27818.1 626.319   3
  -4   7  -9 11806.3 381.914   3
  -4   7 -10 773.516 98.3731   3
  -4   7 -11 4059.56 228.558   3
  -4   7 -11 3753.77 264.088   4
  -4   7 -12 2238.73 177.877   3
  -4   7 -12 2234.18 213.277   4
  -4   7 -13 1739.98 162.374   3
  -4   7 -13 1779.27 198.124   4
  -4   7 -14 4126.64 305.493   4
  -4   7 -14 4478.97 275.998   3
  -4   7 -15 10047.1 439.927   3
  -4   7 -15 10117.5 499.367   4
  -4   7 -16 2093.93 235.681   4
   4  -6 -18 180.191 99.3771   1
   4  -6 -17 735.901 149.730   1
   4  -6 -16 147.196 88.8793   1
   4  -6 -15 2030.71 219.908   1
   4  -6 -14 3565.45 275.175   1
   4  -6 -13 173.134 74.1287   1
   4  -6 -12-12.4223 62.0899   1
   4  -6 -11 464.518 106.023   1
   4  -6 -10 3583.23 247.669   1
   4  -6  -9 8.49152 53.9863   1
   4  -6  -8 4777.48 273.130   1
   4  -6  -7 1611.09 158.185   1
   4  -6  -6 491.900 91.2179   1
   4  -6  -5 3612.50 219.723   1
   4  -6  -4 3617.67 216.622   1
  -4   6   3 5737.17 121.443   4
   4  -6  -3 5785.03 267.133   1
  -4   6   2 515.337 44.5097   4
   4  -6  -2 535.334 85.5268   1
   4  -6  -1-21.0253 50.5637   1
  -4   6   1 11.7600 19.4365   4
  -4   6   0 22613.9 440.921   4
   4  -6   0 21943.8 542.343   1
   4  -6   0 21807.7 479.669   2
  -4   6  -1 53178.4 883.203   4
   4  -6   1 53851.6 915.428   2
   4  -6   1 52082.0 976.138   1
   4  -6   2 18195.6 432.471   2
   4  -6   2 18601.2 474.606   1
   4  -6   3 4919.57 221.009   1
   4  -6   4 1829.87 135.473   1
   4  -6   5 4807.81 221.893   1
  -4   6  -5 5058.61 213.045   3
  -4   6  -6 500.673 73.2266   3
  -4   6  -7 6022.66 249.703   3
  -4   6  -8 33097.7 704.455   3
  -4   6  -9 8474.21 315.399   3
  -4   6 -10 367.930 69.0370   3
  -4   6 -11 532.964 87.0333   3
  -4   6 -12 80.7361 63.9128   3
  -4   6 -13 1622.90 166.629   3
  -4   6 -14 200.724 72.8747   3
  -4   6 -15 3290.42 252.704   3
  -4   6 -16 277.182 99.9885   3
  -4   6 -17 224.373 97.3801   4
   4  -5 -19 179.000 93.3872   1
   4  -5 -18 110.778 91.1861   1
   4  -5 -17 1565.75 204.570   1
   4  -5 -16 118.696 79.2122   1
   4  -5 -15 229.162 96.2693   1
   4  -5 -14 185.345 80.9218   1
   4  -5 -13 437.135 104.065   1
   4  -5 -12 9072.59 408.546   1
   4  -5 -11 9903.47 416.850   1
   4  -5 -11 9726.52 220.761   4
   4  -5 -10 1604.87 67.6722   4
   4  -5 -10 1572.44 165.183   1
   4  -5 -10 1521.53 63.1120   4
   4  -5  -9 66.1652 65.7844   1
   4  -5  -8 29.1228 54.4972   1
   4  -5  -7 8043.18 334.946   1
   4  -5  -6 33460.3 763.150   1
   4  -5  -5 49370.8 977.417   1
   4  -5  -4 12869.2 404.839   1
   4  -5  -3 660.257 90.5592   1
   4  -5  -2 12559.8 377.443   1
  -4   5   2 12422.7 235.453   4
   4  -5  -1 713.794 93.4310   1
  -4   5   0 182.646 58.5273   1
   4  -5   0 159.904 54.2622   1
   4  -5   0 131.596 35.0377   2
  -4   5  -1 33341.6 683.058   1
   4  -5   1 35184.3 680.905   1
   4  -5   1 33141.5 605.614   2
  -4   5  -2 7429.65 261.647   1
   4  -5   2 7159.60 250.147   1
   4  -5   2 7455.83 228.904   2
  -4   5  -3 2356.61 138.489   1
  -4   5  -3 2248.38 123.657   2
   4  -5   3 2183.21 132.948   1
   4  -5   4 3538.06 165.823   1
  -4   5  -4 3451.54 169.241   1
  -4   5  -4 3265.77 158.465   2
  -4   5  -5 378.086 62.4933   3
  -4   5  -5 531.990 69.7897   1
   4  -5   5 449.071 65.8856   1
  -4   5  -6 17611.3 444.663   3
  -4   5  -6 17307.6 431.169   1
  -4   5  -7 2026.72 143.454   3
  -4   5  -7 1928.56 129.944   1
  -4   5  -8 561.731 81.2233   3
  -4   5  -9 733.253 90.8653   3
  -4   5 -10 76.5190 51.0697   3
  -4   5 -11 196.510 66.3763   3
  -4   5 -12 8265.18 357.735   3
  -4   5 -13 17965.0 577.245   3
  -4   5 -14 1167.92 149.479   3
  -4   5 -15 3546.86 268.498   3
  -4   5 -16 3677.29 287.336   3
  -4   5 -17 1756.61 212.943   3
  -4   5 -18 1113.43 187.120   3
   4  -4 -19 3673.66 318.656   1
   4  -4 -18 4577.79 344.044   1
   4  -4 -17 192.749 91.2338   1
   4  -4 -16 617.808 128.995   1
   4  -4 -15 24.2807 69.0204   1
   4  -4 -14-2.17020 62.5117   1
   4  -4 -13 4379.13 285.126   1
   4  -4 -12 12944.8 486.709   1
   4  -4 -12 12407.7 318.498   4
   4  -4 -11 3969.40 257.025   1
   4  -4 -11 3891.49 150.158   4
   4  -4 -10 58.1387 58.0109   1
   4  -4 -10 209.339 32.6375   4
   4  -4  -9 739.100 51.1167   4
   4  -4  -9 788.999 114.474   1
   4  -4  -8 188.057 23.5356   4
   4  -4  -8 239.720 74.1686   1
   4  -4  -7 8257.88 329.935   1
   4  -4  -6 1992.62 154.291   1
   4  -4  -5 11995.9 380.988   1
   4  -4  -4-11.4446 49.5893   1
   4  -4  -3 2613.93 160.055   1
  -4   4   2 3508.25 182.461   1
   4  -4  -2 3660.03 180.728   1
  -4   4   2 3388.80 102.218   4
  -4   4   1 11583.7 333.372   1
   4  -4  -1 11042.8 320.907   1
  -4   4   0 32324.6 629.067   1
   4  -4   0 32067.7 625.826   1
   4  -4   0 31720.2 535.437   2
  -4   4  -1 6710.50 226.759   1
   4  -4   1 6155.83 215.843   1
   4  -4   1 6273.24 180.500   2
   4  -4   2 5927.76 204.541   1
  -4   4  -2 6022.06 206.921   1
  -4   4  -2 5824.17 181.116   2
  -4   4  -3 423.362 51.9055   2
  -4   4  -3 509.550 64.8363   1
   4  -4   3 409.549 55.4119   1
  -4   4  -4 618.870 66.1432   1
  -4   4  -4 672.127 80.5144   3
   4  -4   4 586.960 65.1604   1
  -4   4  -4 580.882 65.6889   2
  -4   4  -5 17772.6 430.746   3
   4  -4   5 17379.6 385.100   1
  -4   4  -5 17325.0 395.447   1
  -4   4  -6 22631.6 523.359   3
  -4   4  -6 22187.0 466.514   1
  -4   4  -7 2979.50 173.386   3
  -4   4  -7 2754.47 139.515   1
  -4   4  -8 8224.18 305.597   3
  -4   4  -8 7749.51 252.801   1
  -4   4  -9 34656.5 750.844   3
  -4   4  -9 32575.5 650.605   1
  -4   4 -10 11708.5 343.837   1
  -4   4 -10 12557.8 415.391   3
  -4   4 -11 951.667 120.329   3
  -4   4 -12 2007.80 180.143   3
  -4   4 -13 0.11989 63.6048   3
  -4   4 -14 5458.84 324.159   3
  -4   4 -15 25163.4 776.226   3
  -4   4 -16 28494.4 869.086   3
  -4   4 -17 9304.45 492.360   3
  -4   4 -18 582.252 144.030   3
  -4   4 -19 325.677 113.664   3
   4  -3 -19 1293.91 195.760   1
   4  -3 -18 1162.77 181.395   1
   4  -3 -17 33.1928 79.3873   1
   4  -3 -16 965.950 157.001   1
   4  -3 -15 80.1662 79.2104   1
   4  -3 -14 6166.71 346.805   1
   4  -3 -13 9.13632 66.1801   1
   4  -3 -13 32.7986 36.2687   4
   4  -3 -12 329.638 86.7373   1
   4  -3 -12 307.831 54.1801   4
   4  -3 -11-6.46751 65.7805   1
   4  -3 -11 8.35822 25.8240   4
   4  -3 -10 798.888 70.7674   4
   4  -3 -10 853.472 116.350   1
   4  -3  -9 469.892 93.8937   1
   4  -3  -9 464.839 49.5101   4
   4  -3  -8 6678.17 183.872   4
   4  -3  -8 6457.45 293.318   1
   4  -3  -7 17946.4 504.344   1
   4  -3  -7 18310.2 338.826   4
   4  -3  -6 3210.56 102.668   4
   4  -3  -6 3332.66 193.141   1
   4  -3  -5 1375.57 123.568   1
   4  -3  -5 1412.33 62.1341   4
  -4   3   5 1297.43 56.5182   4
   4  -3  -4 3123.89 172.229   1
   4  -3  -4 3165.68 94.3225   4
  -4   3   4 3116.96 88.4670   4
  -4   3   3 89.9556 40.3246   1
  -4   3   3 112.604 22.6382   4
   4  -3  -3 19.5252 47.8957   1
  -4   3   2 11385.2 320.098   1
   4  -3  -2 11549.7 324.365   1
  -4   3   2 11305.0 233.990   4
  -4   3   1 8048.33 249.281   1
  -4   3   1 7514.51 197.330   4
   4  -3  -1 8283.47 253.504   1
   4  -3   0 643.833 69.4068   1
  -4   3   0 537.062 63.5593   1
   4  -3   0 544.094 37.9916   2
  -4   3  -1 48654.6 804.698   1
   4  -3   1 48399.0 802.977   1
  -4   3  -1 48762.5 728.097   2
  -4   3  -2 113763. 1670.81   1
   4  -3   2 116083. 1667.47   1
  -4   3  -2 118082. 1629.89   2
  -4   3  -3 63823.3 1008.51   3
  -4   3  -3 58793.4 926.679   1
   4  -3   3 58845.2 915.863   1
   4  -3   4 21143.2 397.720   1
  -4   3  -4 21879.0 479.851   3
  -4   3  -4 20690.3 404.778   1
  -4   3  -5 3367.58 169.472   3
  -4   3  -5 2921.65 120.075   1
  -4   3  -6 491.344 72.4960   3
  -4   3  -6 462.973 49.1474   1
  -4   3  -7 16865.9 449.060   3
  -4   3  -7 15624.1 337.362   1
  -4   3  -8 108635. 1742.89   3
  -4   3  -8 106215. 1562.64   1
  -4   3  -9 124105. 1838.10   1
  -4   3  -9 132385. 2041.13   3
  -4   3 -10 43926.4 783.433   1
  -4   3 -10 47124.7 960.766   3
  -4   3 -11 5662.59 292.163   3
  -4   3 -11 4972.83 204.654   1
  -4   3 -12 753.681 122.291   3
  -4   3 -13 304.250 90.1935   3
  -4   3 -14 9674.36 444.692   3
  -4   3 -15 25459.8 797.734   3
  -4   3 -16 27771.4 876.420   3
  -4   3 -17 6620.75 408.779   3
  -4   3 -18 266.065 96.3157   3
  -4   3 -19 792.449 163.111   3
   4  -2 -19 85.5649 92.3366   1
   4  -2 -18 36.5080 80.5613   1
   4  -2 -17 736.975 147.971   1
   4  -2 -16 816.884 155.965   1
   4  -2 -15 704.839 97.5559   4
   4  -2 -15 674.408 127.997   1
   4  -2 -14 4510.65 299.409   1
   4  -2 -14 3758.32 207.959   4
   4  -2 -13 1507.27 168.720   1
   4  -2 -13 1766.92 136.228   4
   4  -2 -12 3055.04 228.875   1
   4  -2 -12 2955.33 165.687   4
   4  -2 -11 18817.5 580.871   1
   4  -2 -11 19052.9 455.312   4
   4  -2 -10 2385.76 187.482   1
   4  -2 -10 2249.81 130.212   4
   4  -2  -9 717.131 103.275   1
   4  -2  -9 675.176 67.4615   4
   4  -2  -8 2183.06 166.781   1
   4  -2  -8 2483.28 120.949   4
   4  -2  -7 238.181 67.4512   1
   4  -2  -7 375.940 45.9206   4
   4  -2  -6 38333.9 795.542   1
   4  -2  -6 38784.2 651.555   4
  -4   2   6 41146.6 658.139   4
  -4   2   6 39704.8 753.453   3
   4  -2  -5 132413. 2049.40   1
   4  -2  -5 135106. 1889.81   4
  -4   2   5 136231. 1880.35   4
   4  -2  -4 157868. 2306.58   1
   4  -2  -4 153911. 2157.29   4
  -4   2   4 157200. 2141.33   4
   4  -2  -3 42726.9 774.830   1
   4  -2  -3 41460.7 675.146   4
  -4   2   3 42124.2 661.932   4
  -4   2   2 122.049 31.2161   4
   4  -2  -2 66.1440 28.8235   4
   4  -2  -2 156.771 53.3830   1
  -4   2   1 1336.84 83.3995   4
   4  -2  -1 1391.39 94.7586   1
  -4   2   0 18241.5 374.379   1
   4  -2   0 18031.3 380.818   1
  -4   2   0 18094.5 383.346   4
  -4   2  -1 151722. 2110.27   1
  -4   2  -1 151991. 2184.61   4
   4  -2   1 153110. 2119.41   1
  -4   2  -2 221194. 2994.06   1
  -4   2  -2 230415. 3108.16   3
   4  -2   2 219046. 2996.39   1
  -4   2  -3 165035. 2254.81   1
  -4   2  -3 173734. 2402.55   3
   4  -2   3 165107. 2249.20   1
   4  -2   4 22626.5 392.860   1
  -4   2  -4 27455.7 547.542   3
  -4   2  -4 25461.4 397.365   1
  -4   2  -5 2134.39 75.0467   1
  -4   2  -5 2074.67 134.608   3
  -4   2  -6 1565.63 125.773   3
  -4   2  -6 1452.17 61.8127   1
  -4   2  -7 7014.64 279.015   3
  -4   2  -7 6868.72 161.517   1
  -4   2  -8 58548.3 1059.47   3
  -4   2  -8 53505.8 817.419   1
  -4   2  -9 53100.2 832.564   1
  -4   2  -9 56561.5 1078.39   3
  -4   2 -10 24119.1 637.567   3
  -4   2 -10 22620.0 444.135   1
  -4   2 -11 2137.08 185.918   3
  -4   2 -11 1633.65 110.729   1
  -4   2 -12 1815.63 182.969   3
  -4   2 -12 1893.97 112.928   1
  -4   2 -13 11462.4 480.565   3
  -4   2 -13 12035.3 321.180   1
  -4   2 -14 6653.17 375.440   3
  -4   2 -15 1806.23 219.803   3
  -4   2 -16 2696.34 260.912   3
  -4   2 -17 573.196 137.708   3
  -4   2 -18 484.670 140.663   3
  -4   2 -19 444.000 132.791   3
   4  -1 -19 2497.80 265.320   1
   4  -1 -18 8916.32 479.789   1
   4  -1 -17 2467.53 252.912   1
   4  -1 -16 155.697 83.7657   1
   4  -1 -16 170.089 56.1113   4
   4  -1 -15 27.5685 71.0602   1
   4  -1 -15 105.553 49.8126   4
   4  -1 -14 915.165 147.363   1
   4  -1 -14 759.322 101.490   4
   4  -1 -13 11829.4 477.813   1
   4  -1 -13 11880.1 392.588   4
   4  -1 -12 60717.6 1238.58   1
   4  -1 -12 59912.9 1096.68   4
   4  -1 -11 68108.9 1333.49   1
   4  -1 -11 68249.8 1179.14   4
   4  -1 -10 25142.7 558.084   4
   4  -1  -9 3503.31 167.633   4
   4  -1  -8 778.290 75.2916   4
   4  -1  -7 7761.28 242.632   4
  -4   1   7 8102.58 242.213   4
  -4   1   7 7869.26 261.821   3
  -4   1   6 72075.2 1109.51   4
   4  -1  -6 70289.4 1114.66   4
  -4   1   6 70911.1 1144.01   3
  -4   1   5 203015. 2786.77   4
   4  -1  -5 199735. 2797.31   4
  -4   1   4 170994. 2382.63   4
  -4   1   3 32222.3 572.694   4
   4  -1  -3 32772.4 584.676   4
   4  -1  -2 9060.83 247.120   4
  -4   1   2 8750.95 239.124   4
   4  -1  -1 870.158 76.5809   4
   4  -1  -1 814.574 76.4091   1
  -4   1   1 840.799 72.8905   4
   4  -1   0 1065.23 77.4117   1
   4  -1   0 1216.63 93.8390   4
  -4   1   0 1118.95 85.6962   4
   4  -1   1 19062.5 358.132   1
  -4   1  -1 19009.1 411.376   3
  -4   1  -1 18960.3 428.228   4
  -4   1  -2 45295.3 814.557   4
  -4   1  -2 45089.5 786.152   3
   4  -1   2 44865.9 673.753   1
  -4   1  -3 44821.5 794.934   3
   4  -1   3 43576.1 784.687   3
   4  -1   3 43568.2 621.153   1
  -4   1  -3 45269.0 822.489   4
  -4   1  -4 3254.75 166.651   3
  -4   1  -5 5062.85 219.691   3
  -4   1  -6 30151.2 661.137   3
  -4   1  -7 23308.1 577.763   3
  -4   1  -8 1519.64 140.153   3
  -4   1  -9 739.137 44.4009   1
  -4   1  -9 867.403 45.5078   1
  -4   1  -9 697.133 103.722   3
  -4   1 -10 494.106 48.0797   1
  -4   1 -10 713.297 113.303   3
  -4   1 -10 768.570 51.0376   1
  -4   1 -11 17.4457 25.0523   1
  -4   1 -11-75.8238 87.6001   3
  -4   1 -11-2.02683 20.0109   1
  -4   1 -12 696.826 60.2305   1
  -4   1 -12 600.293 118.000   3
  -4   1 -13 6883.85 379.014   3
  -4   1 -14 7077.74 407.397   3
  -4   1 -15 43.8062 79.5036   3
  -4   1 -16 1275.74 190.439   3
  -4   1 -17 120.982 97.3406   3
  -4   1 -18 1137.53 191.852   3
   4   0 -19 18466.7 726.112   1
   4   0 -18 23993.8 817.442   1
   4   0 -17 17078.3 667.079   1
   4   0 -17 16034.8 561.327   4
   4   0 -16 1265.59 177.720   1
   4   0 -16 1117.53 141.427   4
   4   0 -15 730.590 138.416   1
   4   0 -15 646.391 105.940   4
   4   0 -14 284.922 76.1709   4
   4   0 -13 15532.6 480.780   4
   4   0 -12 45961.9 932.408   4
   4   0 -11 46433.0 916.496   4
   4   0 -10 17340.6 460.213   4
   4   0  -9 2227.83 147.877   4
  -4   0   9 2268.20 144.093   3
   4   0  -8 1092.21 100.239   4
  -4   0   8 1181.18 96.6387   3
   4   0  -7 5155.61 209.054   4
  -4   0   7 5146.89 205.958   4
  -4   0   7 4935.92 190.913   3
  -4   0   6 41.4728 25.3039   3
   4   0  -6 76.2180 39.2229   4
  -4   0   6 85.2196 38.2164   4
   4   0  -5 11653.1 319.417   4
  -4   0   5 11553.2 310.089   4
  -4   0   4 6595.16 217.899   4
   4   0  -4 6604.17 225.866   4
   4   0  -4 6606.83 178.322   2
   4   0  -3 1850.20 113.684   4
  -4   0   3 1782.96 110.399   4
   4   0  -3 1754.66 75.0718   2
  -4   0   2 882.652 80.3329   4
   4   0  -2 824.338 82.0906   4
  -4   0   1 19074.9 396.723   3
  -4   0   1 19690.9 436.728   4
   4   0  -1 20104.5 443.614   4
  -4   0   1 19665.2 318.223   2
  -4   0   0 88937.6 1341.88   3
   4   0   0 87843.5 1394.56   4
  -4   0   0 91481.6 1398.09   4
  -4   0  -1 7450.78 231.923   3
   4   0   1 7524.58 260.695   4
  -4   0  -1 7865.12 257.608   4
  -4   0  -2 578.755 72.4699   3
  -4   0  -2 682.181 79.4599   4
   4   0   2 603.119 67.1681   3
   4   0   3 16.3558 12.5558   1
   4   0   3 58.3627 15.5256   1
  -4   0  -3 28.5896 40.1260   3
  -4   0  -3 94.8029 49.0003   4
   4   0   3 41.4533 33.1190   3
  -4   0  -4 87.7713 54.5490   3
  -4   0  -5 600.883 87.8428   3
  -4   0  -6 3428.93 196.014   3
  -4   0  -7 13650.2 433.019   3
  -4   0  -8 390.759 87.8972   3
  -4   0  -9 12815.9 459.321   3
  -4   0 -10 1758.05 177.139   3
  -4   0 -10 1929.22 66.5138   1
  -4   0 -11 5504.22 319.468   3
  -4   0 -11 6101.77 153.446   1
  -4   0 -12 796.591 137.628   3
  -4   0 -13 936.574 155.553   3
  -4   0 -14 1660.56 214.093   3
  -4   0 -15 2050.68 235.309   3
  -4   0 -16 7627.41 456.106   3
  -4   0 -17 441.614 140.076   3
  -4   0 -18 4463.56 372.385   3
   4   1 -19 3826.65 329.983   1
   4   1 -18 10077.4 517.927   1
   4   1 -18 8735.64 431.685   4
   4   1 -17 3454.87 257.823   4
   4   1 -16-55.9432 61.3780   4
   4   1 -15 171.437 66.6060   4
   4   1 -14 2411.85 195.088   4
   4   1 -13 4137.10 245.873   4
   4   1 -12 904.968 114.229   4
   4   1 -11 2921.06 190.042   4
   4   1 -10 484.845 82.8890   4
  -4  -1  10 660.814 83.7868   3
   4   1  -9 900.177 103.278   4
  -4  -1   9 884.752 87.4350   3
  -4  -1   8 2677.68 136.193   3
   4   1  -8 2957.15 172.055   4
   4   1  -7 28594.2 629.445   4
  -4  -1   7 28807.8 538.267   3
   4   1  -6 15203.1 407.249   4
  -4  -1   6 15058.6 326.976   3
   4   1  -6 15405.2 367.585   2
   4   1  -5 2234.91 139.854   4
   4   1  -5 1987.15 107.953   2
  -4  -1   4 810.688 82.2838   4
   4   1  -4 774.084 83.8979   4
   4   1  -4 725.279 62.3518   2
   4   1  -3 45.7663 42.2815   4
  -4  -1   3 60.8718 33.8328   4
  -4  -1   2 2814.47 119.904   3
   4   1  -2 2891.53 159.494   4
  -4  -1   2 3204.10 161.167   4
  -4  -1   2 3198.45 114.926   2
  -4  -1   1 1759.77 99.2450   3
   4   1  -1 2046.14 136.817   4
  -4  -1   1 1900.09 124.100   4
  -4  -1   1 1788.72 83.5321   2
  -4  -1   0 13781.7 327.455   3
   4   1   0 13893.9 383.552   4
  -4  -1   0 14615.8 381.669   4
  -4  -1  -1 1170.22 92.2887   3
   4   1   1 1193.27 88.1481   3
   4   1   1 1213.72 110.353   4
  -4  -1  -1 1318.13 109.493   4
  -4  -1  -2 22383.1 493.002   3
   4   1   2 23227.0 494.144   3
   4   1   2 23378.0 545.882   4
   4   1   3 5318.89 138.658   1
  -4  -1  -3 5544.51 222.997   3
   4   1   3 5418.82 245.201   4
  -4  -1  -4 2003.50 140.394   3
   4   1   4 2003.45 68.0847   1
  -4  -1  -5 8608.38 316.971   3
  -4  -1  -6 7054.23 295.826   3
  -4  -1  -7 1958.31 164.269   3
  -4  -1  -8 13793.4 477.873   3
  -4  -1  -9 24672.4 694.404   3
  -4  -1 -10 7523.47 369.964   3
  -4  -1 -10 6027.78 139.865   1
  -4  -1 -11 3514.15 268.403   3
  -4  -1 -12 10233.1 482.169   3
  -4  -1 -13 1627.62 198.010   3
  -4  -1 -14 82.4381 97.0678   3
  -4  -1 -15 1579.79 217.055   3
  -4  -1 -16 1835.58 231.190   3
  -4  -1 -17 58.4100 98.0879   3
   4   2 -19 312.187 102.621   4
   4   2 -18 465.605 114.831   4
   4   2 -17 174.939 81.2909   4
   4   2 -16 1128.35 149.952   4
   4   2 -15 55.9999 57.0421   4
   4   2 -14 4906.67 288.046   4
   4   2 -13 5141.57 286.256   4
   4   2 -12 669.491 102.836   4
   4   2 -11 1223.51 135.572   4
  -4  -2  10 166.595 44.6110   3
   4   2 -10 67.3110 55.6589   4
  -4  -2   9 5127.97 193.383   3
   4   2  -9 5251.91 262.304   4
  -4  -2   8 461.366 55.3584   3
   4   2  -8 518.882 87.1720   4
  -4  -2   7 3.18577 18.7452   3
   4   2  -7-59.2270 47.3464   4
   4   2  -6 1094.61 112.723   4
   4   2  -6 1103.19 92.6636   2
  -4  -2   6 1038.84 64.4834   3
   4   2  -5 13391.8 400.561   4
   4   2  -5 14336.9 353.686   2
  -4  -2   4 40568.3 643.909   3
   4   2  -4 41311.4 804.675   4
  -4  -2   3 208.923 39.8322   2
  -4  -2   3 249.121 37.5077   3
  -4  -2   2 10675.6 260.872   3
   4   2  -2 11239.8 346.342   4
  -4  -2   2 11563.6 280.588   2
  -4  -2   1 4829.44 171.670   3
   4   2  -1 4979.94 224.173   4
  -4  -2   1 4856.65 168.438   2
  -4  -2   0 16052.8 369.973   3
   4   2   0 15300.5 355.044   3
   4   2   0 16382.7 438.178   4
  -4  -2  -1 15997.7 387.921   3
   4   2   1 15675.2 379.587   3
   4   2   1 16418.1 450.189   4
   4   2   1 15642.6 355.937   1
  -4  -2  -2 15501.0 403.263   3
   4   2   2 15502.4 341.028   1
   4   2   2 16183.4 405.312   3
   4   2   2 15719.0 448.698   4
  -4  -2  -3 22743.2 535.380   3
   4   2   3 23257.7 576.234   4
   4   2   3 22463.3 422.048   1
  -4  -2  -4 677.907 95.1196   3
   4   2   4 517.191 90.5031   4
   4   2   4 483.040 46.7127   1
  -4  -2  -5 18234.6 509.599   3
   4   2   5 17698.2 333.996   1
  -4  -2  -6 48.5235 58.0819   3
   4   2   6 60.1577 18.1459   1
  -4  -2  -7 2395.97 189.678   3
   4   2   7 1988.44 80.3922   1
  -4  -2  -8 1174.79 146.526   3
  -4  -2  -9 81.3323 25.7900   1
  -4  -2  -9 98.0289 80.7312   3
  -4  -2 -10 174.319 30.8571   1
  -4  -2 -10 426.431 120.386   3
  -4  -2 -11 225.786 93.6300   3
  -4  -2 -12 1974.09 216.733   3
  -4  -2 -13 4659.44 338.983   3
  -4  -2 -14 12051.8 559.714   3
  -4  -2 -15 1735.64 213.305   3
  -4  -2 -16 33.2512 104.272   3
  -4  -2 -17 297.797 126.108   3
   4   3 -19-56.1892 77.4942   4
   4   3 -18 1105.12 172.351   4
   4   3 -17 521.553 114.189   4
   4   3 -16 101.190 63.9348   4
   4   3 -15 2584.00 227.346   4
   4   3 -14 512.022 104.823   4
   4   3 -13-11.7120 65.6004   4
   4   3 -12 7000.29 342.891   4
   4   3 -11 12706.4 465.753   4
   4   3 -10 447.218 94.1023   4
  -4  -3   9 409.258 39.6654   3
   4   3  -9 521.059 98.0618   4
  -4  -3   8 4701.22 125.737   3
   4   3  -8 4285.86 240.880   4
  -4  -3   7 1903.97 72.2527   3
   4   3  -7 1834.16 148.142   4
  -4  -3   7 1954.48 64.6654   3
  -4  -3   6 135.594 21.6623   3
  -4  -3   6 177.219 21.7302   3
   4   3  -6 67.0415 46.9139   4
  -4  -3   5 7766.99 168.219   3
   4   3  -5 7351.12 297.100   4
  -4  -3   4 14624.3 283.725   3
   4   3  -4 14373.8 428.251   4
  -4  -3   3 322.662 53.5528   2
  -4  -3   3 339.113 40.5248   3
   4   3  -3 224.105 63.8155   4
  -4  -3   2 6822.27 202.917   3
   4   3  -2 6613.14 276.310   4
  -4  -3   2 6823.72 230.772   2
  -4  -3   1 358.399 50.6123   3
   4   3  -1 290.849 66.4874   4
   4   3  -1 354.557 46.6398   3
  -4  -3   0 9792.05 287.709   3
   4   3   0 9399.73 271.703   3
   4   3   0 9969.86 298.173   1
   4   3   0 10149.0 350.034   4
  -4  -3  -1 15098.4 401.014   3
   4   3   1 15522.9 381.076   1
   4   3   1 15254.4 386.363   3
   4   3   1 15883.7 460.943   4
   4   3   2 1961.90 115.651   1
  -4  -3  -2 1883.95 137.390   3
   4   3   2 1673.57 143.816   4
  -4  -3  -3 69.4096 50.3620   3
   4   3   3 65.9532 26.3374   1
   4   3   3 213.132 69.6347   4
  -4  -3  -4 30.3682 50.8392   3
   4   3   4 57.5729 55.6272   4
   4   3   4 16.3920 20.9685   1
   4   3   5 46.9503 24.3160   1
  -4  -3  -5-12.2688 57.6962   3
  -4  -3  -6 4898.70 273.767   3
   4   3   6 4614.91 163.328   1
  -4  -3  -7 35221.0 870.648   3
   4   3   7 34870.7 610.448   1
  -4  -3  -8 17435.9 585.614   3
   4   3   8 16443.3 351.859   1
  -4  -3  -9 67.9006 77.9311   3
  -4  -3  -9-3.70490 27.0208   1
  -4  -3 -10 2508.36 230.446   3
  -4  -3 -11 356.396 111.929   3
  -4  -3 -12 1224.72 181.343   3
  -4  -3 -13 5124.84 365.884   3
  -4  -3 -14 4442.82 342.694   3
  -4  -3 -15 410.714 128.581   3
  -4  -3 -16 4559.65 366.231   3
   4   4 -18 1569.05 210.274   4
   4   4 -17 1154.11 174.779   4
   4   4 -16 121.448 85.1734   4
   4   4 -15 2633.82 243.738   4
   4   4 -14 126.270 76.4603   4
   4   4 -13 498.937 107.950   4
   4   4 -12 26.9511 58.1942   4
   4   4 -11 254.333 76.1437   4
   4   4 -10 610.770 104.448   4
   4   4  -9 2312.09 194.155   4
   4   4  -8 2235.84 188.208   4
   4   4  -7 12531.9 444.652   4
   4   4  -6 13467.0 445.144   4
   4   4  -5 9807.24 370.857   4
  -4  -4   4 2098.72 87.3958   3
   4   4  -4 1504.37 141.310   4
  -4  -4   4 2029.62 139.792   2
  -4  -4   3 112.583 42.9547   2
  -4  -4   3 107.147 31.4267   3
   4   4  -3 59.8518 46.3447   4
  -4  -4   2 278.194 48.1647   3
   4   4  -2 184.815 68.5356   4
  -4  -4   2 277.157 58.4251   2
  -4  -4   1 2158.14 129.407   3
   4   4  -1 2028.22 110.582   3
  -4  -4   1 1899.27 130.374   2
   4   4  -1 2129.40 161.582   4
  -4  -4   0 33320.9 667.714   3
   4   4   0 31823.5 625.634   3
   4   4   0 32686.4 747.322   4
  -4  -4  -1 38303.1 775.703   3
   4   4   1 37489.6 733.960   3
   4   4   1 38895.6 839.313   4
   4   4   2 85.3426 37.0433   1
  -4  -4  -2 57.5688 50.7681   3
   4   4   2 23.9452 52.7444   4
  -4  -4  -3 6554.14 292.067   3
   4   4   3 6908.11 308.447   4
   4   4   3 6286.21 230.354   1
  -4  -4  -4 1387.45 145.103   3
   4   4   4 1636.32 151.119   4
   4   4   4 1205.24 96.6144   1
  -4  -4  -5 5837.27 314.061   3
   4   4   5 6163.00 301.631   4
   4   4   5 5886.17 218.183   1
  -4  -4  -6 1442.64 162.951   3
   4   4   6 1431.91 103.214   1
  -4  -4  -7 2790.39 228.916   3
   4   4   7 2555.30 135.319   1
  -4  -4  -8 342.654 102.220   3
  -4  -4  -9 25026.3 738.786   3
  -4  -4  -9 18407.8 453.625   1
  -4  -4 -10 34975.3 959.630   3
  -4  -4 -11 8178.51 438.401   3
  -4  -4 -12 1172.32 182.243   3
  -4  -4 -13 65.2333 83.2246   3
  -4  -4 -14 595.989 135.499   3
  -4  -4 -15 5213.89 392.952   3
   4   5 -17 10.8561 71.8146   4
   4   5 -16 1785.20 219.509   4
   4   5 -15 773.307 132.195   4
   4   5 -14 2657.37 243.067   4
   4   5 -13 10229.4 475.350   4
   4   5 -12 7882.57 401.437   4
   4   5 -11 466.027 108.644   4
   4   5 -10 265.199 77.1586   4
   4   5  -9 82.9555 66.3888   4
   4   5  -8 14.2566 55.4523   4
   4   5  -7 9472.56 392.940   4
   4   5  -6 9747.16 396.364   4
   4   5  -5 787.471 114.094   4
   4   5  -4 14238.3 478.486   4
  -4  -5   4 14081.8 426.910   2
  -4  -5   4 14826.1 267.125   3
   4   5  -3 12721.2 441.254   4
  -4  -5   3 12424.7 389.607   2
  -4  -5   3 12780.3 293.003   3
   4   5  -2 3935.73 234.131   4
   4   5  -2 3616.30 141.265   3
  -4  -5   2 3686.53 199.226   2
  -4  -5   2 3971.26 166.139   3
   4   5  -1 488.846 93.7712   4
   4   5  -1 462.817 55.8761   3
  -4  -5   1 440.708 68.1401   3
  -4  -5   1 502.899 82.2767   2
  -4  -5   0 526.357 76.8190   3
   4   5   0 451.161 62.7290   3
   4   5   0 534.432 94.5950   4
  -4  -5  -1 3051.24 186.743   3
   4   5   1 3170.25 214.782   4
  -4  -5  -2 37727.2 817.773   3
   4   5   2 38006.2 869.596   4
  -4  -5  -3 69526.2 1298.59   3
   4   5   3 69481.5 1332.15   4
  -4  -5  -4 37063.7 865.597   3
   4   5   4 38092.3 884.200   4
  -4  -5  -5 4981.31 288.120   3
   4   5   5 4773.43 277.004   4
  -4  -5  -6 118.332 70.6011   3
  -4  -5  -7-43.1319 73.2130   3
  -4  -5  -8 11170.2 483.394   3
  -4  -5  -9 31821.8 897.595   3
  -4  -5 -10 28911.6 874.974   3
  -4  -5 -11 15359.1 630.931   3
  -4  -5 -12 657.492 154.236   3
  -4  -5 -13 573.884 152.741   3
  -4  -5 -14 2689.51 288.641   3
   4   6 -16 20.6715 79.3921   4
   4   6 -15 81.4078 74.6181   4
   4   6 -14-29.5641 75.1085   4
   4   6 -13 643.465 133.483   4
   4   6 -12 131.098 71.9487   4
   4   6 -11 13404.4 544.422   4
   4   6 -10 11923.3 496.218   4
   4   6  -9 4443.40 290.108   4
   4   6  -8 721.402 125.761   4
   4   6  -7 379.422 92.3646   4
   4   6  -6 2204.52 190.024   4
   4   6  -5 18450.6 588.830   4
  -4  -6   5 18838.0 542.891   2
   4   6  -4 74937.1 1445.71   4
  -4  -6   4 75925.6 1365.11   2
   4   6  -3 61533.0 1254.00   4
  -4  -6   3 61986.9 1181.67   2
  -4  -6   3 64323.7 977.057   3
   4   6  -2 5717.89 189.400   3
   4   6  -2 5691.35 301.698   4
  -4  -6   2 5822.06 273.625   2
  -4  -6   2 6338.09 216.349   3
  -4  -6   1 405.328 66.3042   3
   4   6  -1 389.866 55.7881   3
   4   6  -1 349.967 87.4664   4
  -4  -6   1 349.713 68.6235   2
   4   6   0 599.846 105.366   4
  -4  -6   0 491.057 80.2121   3
   4   6   1 7550.36 349.972   4
  -4  -6  -1 7748.10 309.781   3
   4   6   2 13691.8 489.927   4
  -4  -6  -2 13815.6 448.463   3
   4   6   3 44412.0 1003.25   4
  -4  -6  -3 44504.3 963.085   3
   4   6   4 30477.3 792.404   4
  -4  -6  -4 29902.6 769.109   3
   4   6   5 3081.96 230.986   4
  -4  -6  -5 3201.48 235.472   3
   4   6   6 3131.05 237.148   4
  -4  -6  -6 3473.51 255.088   3
  -4  -6  -7 5610.69 335.517   3
  -4  -6  -8 3509.55 272.777   3
  -4  -6  -9 183.901 91.9900   3
  -4  -6 -10 4963.33 349.230   3
  -4  -6 -11 2465.43 257.011   3
  -4  -6 -12 1020.37 180.484   3
  -4  -6 -13 2101.21 253.427   3
   4   7 -14 976.843 170.851   4
   4   7 -13 1251.08 184.788   4
   4   7 -12 10524.5 510.670   4
   4   7 -11 32114.2 928.197   4
   4   7 -10 29416.4 871.121   4
   4   7  -9 10261.4 477.709   4
   4   7  -8 2.49391 63.1383   4
   4   7  -7 31.1106 63.3203   4
   4   7  -6 4.14348 60.0798   4
   4   7  -5 6885.66 356.596   4
  -4  -7   5 6480.00 317.354   2
   4   7  -4 15516.3 552.150   4
  -4  -7   4 15743.8 509.424   2
   4   7  -3 18281.0 601.163   4
  -4  -7   3 18129.4 553.545   2
   4   7  -2 7352.23 364.050   4
  -4  -7   2 7398.47 335.708   2
  -4  -7   2 7930.21 249.924   3
   4   7  -1 1093.56 148.083   4
  -4  -7   1 1298.76 109.653   3
  -4  -7   1 1072.92 126.845   2
   4   7   0 13015.8 490.598   4
  -4  -7   0 12827.6 396.711   3
   4   7   1 18947.8 613.774   4
  -4  -7  -1 19515.6 538.083   3
   4   7   2 2228.79 203.165   4
  -4  -7  -2 2133.95 175.100   3
  -4  -7  -3 1078.57 136.009   3
   4   7   3 1167.09 149.985   4
   4   7   4 1522.60 175.780   4
  -4  -7  -4 1385.67 160.024   3
  -4  -7  -5 1301.38 157.633   3
   4   7   5 1078.18 155.384   4
   4   7   6 2407.25 218.596   4
  -4  -7  -6 2791.03 234.647   3
  -4  -7  -7 9182.59 450.470   3
  -4  -7  -8 13951.5 574.312   3
  -4  -7  -9 1753.50 213.949   3
  -4  -7 -10 461.396 139.944   3
  -4  -7 -11 202.159 110.400   3
  -4  -7 -12 247.824 110.897   3
   4   8 -12 326.479 121.507   4
   4   8 -11 1075.61 179.149   4
   4   8 -10 7142.84 417.526   4
   4   8  -9 2882.75 260.958   4
   4   8  -8 729.614 138.933   4
   4   8  -7 5905.71 357.500   4
   4   8  -6 14771.8 571.444   4
   4   8  -5 6453.75 364.134   4
  -4  -8   5 6136.42 329.254   2
  -4  -8   4 106.426 57.1744   2
   4   8  -4 207.374 91.6121   4
  -4  -8   3 156.761 79.5361   2
   4   8  -3 38.8756 58.9769   4
   4   8  -2-26.5779 63.9423   4
  -4  -8   2 2.09504 56.3018   2
   4   8  -1 72.7112 61.6282   4
  -4  -8   1 44.3700 70.5915   2
   4   8   0 5159.17 315.889   4
  -4  -8   0 4624.99 283.700   2
  -4  -8   0 4804.91 233.690   3
   4   8   1 15189.2 565.432   4
  -4  -8  -1 15377.1 478.065   3
   4   8   2 4287.57 292.441   4
  -4  -8  -2 4539.22 262.012   3
  -4  -8  -3 217.593 78.8395   3
   4   8   3 149.602 76.2553   4
   4   8   4 19.4449 63.1875   4
  -4  -8  -4 122.711 62.9915   3
  -4  -8  -5 572.491 115.292   3
   4   8   5 762.320 138.212   4
   4   8   6 2033.50 210.158   4
  -4  -8  -6 1857.31 197.162   3
  -4  -8  -7 106.826 71.8551   3
  -4  -8  -8-43.7933 77.4039   3
  -4  -8  -9 1470.52 203.090   3
  -4  -8 -10 2970.70 284.500   3
  -4  -8 -11 114.801 104.393   3
   4   9 -10 42.7849 69.2104   4
   4   9  -9 180.621 95.4863   4
   4   9  -8-6.09671 77.5237   4
   4   9  -7 59.5363 65.6118   4
   4   9  -6 2633.02 250.373   4
   4   9  -5 3951.12 297.475   4
  -4  -9   5 3369.10 257.476   2
  -4  -9   4 175.452 80.2923   2
   4   9  -4 237.971 87.7887   4
  -4  -9   3 1376.52 170.552   2
   4   9  -3 1288.25 172.324   4
  -4  -9   2 797.667 129.975   2
   4   9  -2 1181.61 173.572   4
   4   9  -1 6468.11 377.086   4
  -4  -9   1 6064.78 346.095   2
   4   9   0 4712.48 319.264   4
  -4  -9   0 4961.59 313.778   2
   4   9   1 3480.11 277.833   4
   4   9   2 2318.19 225.848   4
   4   9   3 2397.85 233.236   4
  -4  -9  -3 2447.94 204.775   3
  -4  -9  -4 1393.04 165.694   3
   4   9   4 1444.18 185.821   4
   4   9   5 3914.87 302.495   4
  -4  -9  -5 3648.08 275.369   3
   4   9   6 10641.1 503.415   4
  -4  -9  -6 10455.6 489.033   3
  -4  -9  -7 4193.75 316.783   3
  -4  -9  -8 1477.49 196.663   3
  -4  -9  -9 750.493 149.620   3
  -4  -9 -10 835.116 166.844   3
   4  10  -7 5807.07 394.182   4
   4  10  -6 2599.33 262.998   4
  -4 -10   5 920.401 151.761   2
   4  10  -5 1011.57 158.245   4
   4  10  -4 3124.86 278.316   4
  -4 -10   4 2980.30 256.924   2
  -4 -10   3 1407.16 181.174   2
   4  10  -3 1385.29 192.944   4
  -4 -10   2 710.767 137.258   2
   4  10  -2 1209.12 182.781   4
   4  10  -1 7543.73 429.961   4
  -4 -10   1 6932.63 397.260   2
   4  10   0 4083.99 315.670   4
  -4 -10   0 3921.82 296.872   2
   4  10   1 57.1486 81.7483   4
  -4 -10  -1-149.827 99.8119   2
   4  10   2 172.082 97.8215   4
   4  10   3 403.456 117.741   4
   4  10   4 178.853 96.3425   4
   4  10   5 1777.43 217.435   4
  -4 -10  -6 977.920 158.606   3
   4  10   6 814.129 153.995   4
  -4 -10  -7 40.5524 75.4084   3
  -4 -10  -8 3356.88 297.767   3
  -4 -10  -9 3445.95 312.214   3
  -4 -11   5 579.263 132.446   2
  -4 -11   4 568.280 136.585   2
  -4 -11   3 687.382 141.895   2
   4  11  -3 503.398 129.799   4
  -4 -11   2 739.849 142.385   2
   4  11  -2 840.324 162.844   4
  -4 -11   1 1592.08 195.067   2
   4  11  -1 1811.40 228.645   4
   4  11   0 12.4137 86.1678   4
  -4 -11   0 207.228 94.3053   2
   4  11   1 9291.58 503.203   4
  -4 -11  -1 8732.57 478.310   2
   4  11   2 10232.8 527.584   4
  -4 -11  -2 10263.0 520.633   2
   4  11   3 2623.70 268.539   4
   4  11   4 85.5913 90.2188   4
   4  11   5 55.9483 93.0463   4
   4  11   6 66.6066 84.5356   4
   5 -14  -4 509.707 124.434   2
   5 -14  -3 1605.75 222.997   1
   5 -14  -3 1274.75 185.802   2
   5 -14  -2 8034.60 485.872   1
   5 -14  -2 7563.31 434.993   2
   5 -14  -1 2160.69 256.442   1
   5 -14  -1 1861.06 214.873   2
   5 -14   0 579.066 134.415   2
   5 -14   0 175.882 79.7802   1
   5 -14   1 2239.70 249.149   1
   5 -14   1 2489.16 250.143   2
   5 -14   2 1910.96 213.258   2
   5 -14   2 1576.10 217.771   1
   5 -14   3 288.603 103.977   2
   5 -14   3 558.514 139.775   1
  -5  14  -4 2994.51 239.165   4
   5 -14   4 2842.10 264.873   2
  -5  14  -5 6403.58 364.572   4
  -5  14  -6 720.357 134.746   4
  -5  14  -7 813.644 145.859   4
  -5  14  -8 641.755 134.899   4
  -5  14  -9-21.8925 67.8247   4
   5 -13  -7-72.2517 84.5108   1
   5 -13  -6 3051.15 293.098   1
   5 -13  -5 1258.75 195.067   1
   5 -13  -4 496.490 142.703   1
   5 -13  -3 2727.45 268.764   1
   5 -13  -3 2943.33 258.592   2
   5 -13  -2 4712.68 351.355   1
   5 -13  -2 4034.32 300.332   2
   5 -13  -1 3580.26 304.177   1
   5 -13  -1 2990.84 260.497   2
   5 -13   0 210.913 93.6218   1
   5 -13   0 273.776 84.7453   2
   5 -13   1 1700.12 190.000   2
   5 -13   1 1957.23 231.643   1
   5 -13   2 958.087 148.485   2
   5 -13   2 1397.99 196.652   1
  -5  13  -2 1412.12 153.683   4
   5 -13   3 3222.71 290.420   1
  -5  13  -3 3509.16 238.460   4
   5 -13   3 3450.09 272.848   2
   5 -13   4 134.947 81.5193   2
  -5  13  -4 334.663 86.8998   4
   5 -13   4 379.948 112.713   1
  -5  13  -5 34.5560 52.0263   4
  -5  13  -6 36.5457 63.6877   4
  -5  13  -7 65.3299 62.3544   4
  -5  13  -8 44.8255 67.1820   4
  -5  13  -9 5392.85 355.203   4
  -5  13 -10 7491.65 435.044   4
   5 -12 -10 135.311 101.397   1
   5 -12  -9 2017.36 241.678   1
   5 -12  -8 1035.79 171.961   1
   5 -12  -7 619.341 141.019   1
   5 -12  -6 875.227 154.886   1
   5 -12  -5 558.495 136.128   1
   5 -12  -4 7676.15 435.625   1
   5 -12  -3 7591.68 429.736   1
   5 -12  -2 1224.25 176.954   1
   5 -12  -2 1293.81 162.818   2
   5 -12  -1 166.024 77.8065   1
   5 -12  -1 177.625 74.3153   2
   5 -12   0 1481.38 197.991   1
  -5  12   0 1606.41 138.518   4
   5 -12   0 1379.28 165.870   2
   5 -12   1 15.5666 58.4801   2
   5 -12   1 50.8933 83.5102   1
  -5  12  -1 12.1269 38.5919   4
   5 -12   2 7302.49 410.192   1
  -5  12  -2 7674.58 330.381   4
   5 -12   2 7118.03 369.028   2
   5 -12   3 20741.5 711.637   1
  -5  12  -3 19913.9 584.748   4
   5 -12   3 19647.0 650.358   2
   5 -12   4 12248.1 534.360   1
  -5  12  -4 11511.0 440.679   4
   5 -12   4 11246.0 476.363   2
  -5  12  -5 603.072 104.197   4
  -5  12  -6 670.859 110.511   4
  -5  12  -7 5654.81 333.566   4
  -5  12  -8 3891.29 281.462   4
  -5  12  -9 355.039 115.487   4
  -5  12 -10 1167.13 172.727   4
  -5  12 -11 562.849 135.857   4
   5 -11 -12-125.057 86.2640   1
   5 -11 -11 7925.82 463.338   1
   5 -11 -10 9841.25 513.597   1
   5 -11  -9 3668.80 304.352   1
   5 -11  -8 857.149 154.687   1
   5 -11  -7 472.920 127.489   1
   5 -11  -6 432.089 114.134   1
   5 -11  -5 264.308 102.063   1
   5 -11  -4 10948.8 494.648   1
   5 -11  -3 13154.9 541.644   1
   5 -11  -2 2963.64 249.734   1
  -5  11   1 2886.33 162.159   4
   5 -11  -1 2542.13 204.604   2
   5 -11  -1 2931.82 246.843   1
   5 -11   0 17214.6 614.899   1
  -5  11   0 17437.4 466.643   4
   5 -11   0 16230.2 541.636   2
   5 -11   1 17436.5 620.344   1
  -5  11  -1 18592.0 498.789   4
   5 -11   1 17441.3 565.297   2
   5 -11   2 8015.75 405.321   1
  -5  11  -2 7753.54 315.742   4
   5 -11   2 6994.11 341.422   2
   5 -11   3 202.002 77.9309   2
  -5  11  -3-6.90873 49.1496   4
   5 -11   3 135.142 78.6935   1
  -5  11  -4 1755.02 161.439   4
   5 -11   4 1751.28 189.338   1
   5 -11   4 1734.77 177.286   2
   5 -11   5 60.4762 69.3573   1
  -5  11  -5-5.22209 43.4392   4
  -5  11  -6 3370.15 241.119   4
  -5  11  -7 30989.8 718.590   3
  -5  11  -7 28785.5 799.961   4
  -5  11  -8 33687.4 769.978   3
  -5  11  -8 33581.2 888.317   4
  -5  11  -9 16180.2 599.265   4
  -5  11 -10 3713.17 287.237   4
  -5  11 -11 258.755 96.4672   4
  -5  11 -12 9.77503 66.4434   4
  -5  11 -13 2513.85 258.040   4
   5 -10 -14 1600.82 221.742   1
   5 -10 -13 3489.72 305.827   1
   5 -10 -12 72.0536 74.4094   1
   5 -10 -11 2238.61 242.764   1
   5 -10 -10 5999.59 383.660   1
   5 -10  -9 1262.23 177.543   1
   5 -10  -8 1778.66 205.971   1
   5 -10  -7 12587.4 531.779   1
   5 -10  -6 28815.0 838.078   1
   5 -10  -5 22031.6 707.918   1
   5 -10  -4 1694.22 190.868   1
   5 -10  -3 403.486 107.472   1
  -5  10   3 378.410 51.6468   4
   5 -10  -2 110.917 63.7005   1
  -5  10   2 34.3501 35.6946   4
  -5  10   1 4377.93 189.407   4
   5 -10  -1 4208.67 245.549   2
   5 -10  -1 4427.75 284.312   1
  -5  10   0 28911.4 609.780   4
   5 -10   0 28345.5 711.351   2
   5 -10   0 27411.8 776.900   1
   5 -10   1 71346.9 1434.80   1
  -5  10  -1 74156.6 1247.65   4
   5 -10   1 69748.6 1337.63   2
   5 -10   2 42282.0 1002.00   1
  -5  10  -2 44449.5 871.906   4
   5 -10   2 40473.8 914.827   2
   5 -10   3 4718.74 290.761   1
  -5  10  -3 4749.72 241.075   4
   5 -10   3 4648.86 262.118   2
   5 -10   4 2505.32 214.493   1
  -5  10  -4 2512.58 181.794   4
   5 -10   5 78.0958 59.8430   1
  -5  10  -5 141.165 55.8917   4
  -5  10  -6 6916.53 330.662   4
  -5  10  -7 21581.2 574.049   3
  -5  10  -7 22198.5 646.478   4
  -5  10  -8 23899.2 613.296   3
  -5  10  -8 24274.9 706.017   4
  -5  10  -9 5080.41 256.932   3
  -5  10  -9 4517.21 295.213   4
  -5  10 -10 1500.65 142.980   3
  -5  10 -10 1453.15 177.065   4
  -5  10 -11 1856.33 208.866   4
  -5  10 -12-42.8511 82.6757   4
  -5  10 -13 1190.58 177.139   4
  -5  10 -14 708.504 148.395   4
   5  -9 -15 80.2316 87.3019   1
   5  -9 -14 4464.66 344.026   1
   5  -9 -13 20249.2 744.981   1
   5  -9 -12 15130.5 622.425   1
   5  -9 -11 8006.84 439.219   1
   5  -9 -10 1208.15 169.655   1
   5  -9  -9-21.1127 66.5211   1
   5  -9  -8-38.6879 83.7521   1
   5  -9  -7 16625.8 595.531   1
   5  -9  -6 64632.4 1359.66   1
   5  -9  -5 43388.8 1032.08   1
  -5   9   4 8112.17 174.888   4
   5  -9  -4 7440.72 373.392   1
  -5   9   3 235.497 32.5893   4
   5  -9  -3 344.843 93.5217   1
  -5   9   2 2343.60 117.056   4
   5  -9  -2 2108.01 194.366   1
  -5   9   1 2480.53 129.477   4
   5  -9  -1 2158.83 161.964   2
   5  -9  -1 2388.13 198.818   1
  -5   9   0 10895.5 316.220   4
   5  -9   0 10804.4 376.406   2
   5  -9   0 10756.6 427.545   1
  -5   9  -1 33769.7 673.564   4
   5  -9   1 30483.1 717.985   2
   5  -9   1 30640.4 789.564   1
   5  -9   2 1851.44 172.185   1
  -5   9  -2 1859.71 138.748   4
   5  -9   2 1693.86 143.370   2
   5  -9   3 7501.92 345.980   1
  -5   9  -3 7507.46 295.017   4
   5  -9   3 7220.50 309.769   2
   5  -9   4 12720.6 463.664   1
  -5   9  -4 13216.6 422.121   4
   5  -9   5 4191.11 259.293   1
  -5   9  -5 4076.18 234.193   4
   5  -9   6 363.023 84.8799   1
  -5   9  -6 358.672 71.4131   3
  -5   9  -6 255.089 72.4292   4
  -5   9  -7 194.349 63.3852   3
  -5   9  -7 168.710 68.8992   4
  -5   9  -8 290.702 72.4904   3
  -5   9  -8 316.964 80.4422   4
  -5   9  -9 2673.53 187.514   3
  -5   9  -9 2447.95 216.297   4
  -5   9 -10 14637.0 468.324   3
  -5   9 -10 14086.0 544.473   4
  -5   9 -11 8678.57 358.976   3
  -5   9 -11 8470.70 427.272   4
  -5   9 -12 488.234 91.7198   3
  -5   9 -12 465.721 121.146   4
  -5   9 -13 193.334 79.9804   4
  -5   9 -14 79.2191 74.2005   4
  -5   9 -15 97.6335 98.0130   4
   5  -8 -16 212.688 94.2989   1
   5  -8 -15 91.4145 87.0006   1
   5  -8 -14 3478.73 299.016   1
   5  -8 -13 15921.6 631.670   1
   5  -8 -12 18179.1 665.984   1
   5  -8 -11 2884.28 251.091   1
   5  -8 -10 1510.91 182.963   1
   5  -8  -9 1714.08 190.201   1
   5  -8  -8 1402.59 165.216   1
   5  -8  -7 6954.40 355.917   1
   5  -8  -6 3997.85 266.856   1
   5  -8  -5 1205.30 150.349   1
   5  -8  -4 8319.64 375.099   1
  -5   8   3 41674.1 640.238   4
   5  -8  -3 40606.2 939.571   1
  -5   8   2 7436.06 202.344   4
   5  -8  -2 7322.55 337.958   1
   5  -8  -1 163.022 69.1157   1
  -5   8   1 97.8953 32.1674   4
   5  -8  -1 172.721 51.2508   2
  -5   8   0 2017.28 119.937   4
   5  -8   0 2074.26 147.400   2
   5  -8   0 1939.01 167.876   1
   5  -8   1 106.763 43.7633   2
   5  -8   1 61.6865 51.7593   1
  -5   8  -1 57.1397 35.0617   4
  -5   8  -2 3744.62 186.540   4
   5  -8   2 3235.64 185.780   2
   5  -8   2 3368.38 214.421   1
   5  -8   3 27288.4 683.379   1
  -5   8  -3 27454.6 620.593   4
   5  -8   3 26910.0 631.363   2
   5  -8   4 32896.0 761.267   1
  -5   8  -4 30816.5 698.297   4
   5  -8   5 3172.09 207.677   1
  -5   8  -5 2800.97 182.753   4
  -5   8  -6 3765.05 205.066   3
   5  -8   6 3897.32 229.744   1
  -5   8  -6 3756.44 219.601   4
  -5   8  -7 691.234 95.5874   3
  -5   8  -7 590.530 102.052   4
  -5   8  -8 1421.44 137.626   3
  -5   8  -9 822.388 106.688   3
  -5   8 -10 1476.02 141.924   3
  -5   8 -11 533.290 94.6895   3
  -5   8 -11 509.289 107.938   4
  -5   8 -12 268.263 71.9525   3
  -5   8 -12 232.426 89.6024   4
  -5   8 -13 2405.62 198.341   3
  -5   8 -13 2322.25 231.996   4
  -5   8 -14 1100.78 144.839   3
  -5   8 -14 1213.38 181.322   4
  -5   8 -15 3972.17 322.167   4
   5  -7 -17 1632.48 218.583   1
   5  -7 -16 2137.69 243.362   1
   5  -7 -15 2325.06 246.614   1
   5  -7 -14 821.386 154.974   1
   5  -7 -13 1680.29 200.705   1
   5  -7 -12 1551.09 188.301   1
   5  -7 -11 7481.75 393.153   1
   5  -7 -10 26323.1 768.006   1
   5  -7  -9 10372.3 447.268   1
   5  -7  -8 127.352 77.3494   1
   5  -7  -7 101.705 67.1575   1
   5  -7  -6 91.9731 68.4188   1
   5  -7  -5 871.147 124.349   1
   5  -7  -4 8403.95 360.094   1
  -5   7   3 28743.9 441.729   4
   5  -7  -3 27814.3 706.564   1
  -5   7   2 741.622 54.3544   4
   5  -7  -2 723.911 109.400   1
  -5   7   1 4848.84 164.224   4
   5  -7  -1 4539.44 246.140   1
  -5   7   0 4.43681 26.3426   4
   5  -7   0 13.3456 32.6936   2
   5  -7   0 17.7546 48.9859   1
  -5   7  -1 3395.93 158.792   4
   5  -7   1 3587.94 206.482   1
   5  -7   1 3499.95 174.280   2
   5  -7   2 7563.95 301.933   1
   5  -7   2 7064.99 262.087   2
   5  -7   3 48.2425 41.0685   1
   5  -7   4 36.0840 49.3087   1
   5  -7   5 4501.67 225.924   1
  -5   7  -6 3542.24 195.378   3
   5  -7   6 3440.72 205.967   1
  -5   7  -7 3110.59 186.051   3
  -5   7  -8 12959.0 418.348   3
  -5   7  -9 9516.39 360.329   3
  -5   7 -10 494.407 79.7551   3
  -5   7 -11 755.672 107.804   3
  -5   7 -12 1735.43 165.291   3
  -5   7 -13 1640.89 173.406   3
  -5   7 -14 1215.87 154.484   3
  -5   7 -15 951.186 146.095   3
  -5   7 -16 21.2686 69.4121   3
   5  -6 -17 6134.88 408.483   1
   5  -6 -16 3460.81 299.048   1
   5  -6 -15-80.3774 87.6232   1
   5  -6 -14 57.6842 78.2214   1
   5  -6 -13 256.209 90.4666   1
   5  -6 -12 257.588 94.3788   1
   5  -6 -11 825.359 133.688   1
   5  -6 -10 2312.03 208.775   1
   5  -6  -9 1181.18 152.899   1
   5  -6  -8 5113.68 292.272   1
   5  -6  -7 5578.64 293.789   1
   5  -6  -6 8609.11 365.164   1
   5  -6  -5 17407.0 525.941   1
   5  -6  -4 5330.13 268.372   1
   5  -6  -3 4509.35 241.949   1
  -5   6   3 4317.13 103.574   4
  -5   6   3 4673.98 105.506   4
   5  -6  -2 3570.30 210.328   1
  -5   6   2 3521.25 117.331   4
   5  -6  -1 5029.26 241.671   1
   5  -6   0 2859.59 179.075   1
   5  -6   0 2737.39 137.210   2
   5  -6   1 11390.5 362.239   1
   5  -6   1 11393.9 308.034   2
   5  -6   2 31840.4 677.720   1
   5  -6   3 891.819 94.9720   1
   5  -6   4 1096.30 102.258   1
   5  -6   5 869.741 95.4678   1
  -5   6  -5 920.024 97.4821   3
   5  -6   6 1097.32 102.184   1
  -5   6  -6 745.022 94.1360   3
  -5   6  -7 1081.65 111.908   3
  -5   6  -8 1857.97 149.575   3
  -5   6  -9 1718.90 146.845   3
  -5   6 -10 7112.66 317.596   3
  -5   6 -11 8552.09 363.796   3
  -5   6 -12 2274.08 193.917   3
  -5   6 -13 55.7975 67.0613   3
  -5   6 -14-17.0679 59.7326   3
  -5   6 -15 357.687 107.604   3
  -5   6 -16 324.362 113.988   3
  -5   6 -17 3805.84 307.811   3
   5  -5 -18 400.880 128.801   1
   5  -5 -17 93.3867 87.1523   1
   5  -5 -16-4.16875 69.9111   1
   5  -5 -15 4204.10 312.330   1
   5  -5 -14 3016.09 260.708   1
   5  -5 -13 1586.41 186.746   1
   5  -5 -12 6712.34 362.411   1
   5  -5 -11 5978.87 332.423   1
   5  -5 -10 3625.76 248.956   1
   5  -5  -9 2804.85 214.073   1
   5  -5  -8 5886.79 300.882   1
   5  -5  -7 4808.25 265.586   1
   5  -5  -6 7660.28 329.322   1
   5  -5  -5 17225.7 507.392   1
   5  -5  -4 490.219 90.6712   1
  -5   5   3 5373.28 124.982   4
   5  -5  -3 5249.94 251.030   1
   5  -5  -2 4744.92 228.560   1
  -5   5   2 4680.85 141.991   4
   5  -5  -1 1772.07 137.127   1
   5  -5  -1 1719.47 92.6643   2
   5  -5   0 60.4711 25.1861   2
   5  -5   0 75.6117 46.5184   1
  -5   5  -1 3899.12 189.492   1
   5  -5   1 3763.39 186.779   1
   5  -5   1 3515.85 142.433   2
  -5   5  -2 1142.81 100.913   1
   5  -5   2 1130.04 99.3617   1
  -5   5  -3 13423.8 370.218   1
  -5   5  -3 13720.1 339.479   2
   5  -5   3 14296.5 367.305   1
   5  -5   4 45935.0 809.946   1
  -5   5  -4 44975.4 855.436   3
  -5   5  -4 45367.6 824.652   1
  -5   5  -4 43867.3 795.996   2
   5  -5   5 21700.4 469.263   1
  -5   5  -5 20939.5 518.664   3
  -5   5  -5 19689.1 474.034   1
  -5   5  -6 75.2024 36.2176   1
  -5   5  -6 80.3566 48.9298   3
  -5   5  -7 663.637 90.2542   3
  -5   5  -7 744.234 80.4160   1
  -5   5  -8 4063.17 223.923   3
  -5   5  -8 3678.60 178.705   1
  -5   5  -9 69.2043 44.1665   1
  -5   5  -9 7.35795 44.7994   3
  -5   5 -10 6131.18 295.252   3
  -5   5 -11 6571.99 316.160   3
  -5   5 -12 2377.61 197.317   3
  -5   5 -13 464.047 102.883   3
  -5   5 -14 2267.72 209.574   3
  -5   5 -15 13817.6 557.530   3
  -5   5 -16 9321.93 471.540   3
  -5   5 -17 572.660 142.563   3
  -5   5 -18 91.2440 93.8408   3
  -5   5 -19 123.144 115.164   3
   5  -4 -18 3273.30 302.770   1
   5  -4 -17 518.544 130.006   1
   5  -4 -16 166.893 87.7650   1
   5  -4 -15 961.346 154.666   1
   5  -4 -14 1157.88 167.502   1
   5  -4 -13 24.4908 68.6187   1
   5  -4 -12 8405.83 403.661   1
   5  -4 -11 668.518 61.6078   4
   5  -4 -11 702.281 118.245   1
   5  -4 -10 10326.0 247.195   4
   5  -4 -10 10960.6 437.672   1
   5  -4  -9 4297.19 260.557   1
   5  -4  -9 4388.96 134.008   4
   5  -4  -8 439.346 39.5465   4
   5  -4  -8 448.201 93.1566   1
   5  -4  -7 15.2946 12.6173   4
   5  -4  -7-38.1316 51.6548   1
   5  -4  -6 67.8332 51.4886   1
   5  -4  -6 146.313 20.8907   4
  -5   4   5 1005.74 45.9471   4
   5  -4  -5 884.215 110.040   1
   5  -4  -4 3630.66 205.346   1
  -5   4   4 3757.38 102.541   4
   5  -4  -3 54072.8 1001.40   1
  -5   4   3 54001.5 801.060   4
  -5   4   2 36780.4 604.634   4
   5  -4  -2 36259.0 739.100   1
   5  -4  -1 289.079 64.4979   1
  -5   4   1 250.252 61.0432   1
  -5   4   1 356.834 49.4832   4
   5  -4  -1 237.994 31.1920   2
  -5   4   0 4500.90 196.002   1
   5  -4   0 4417.74 192.255   1
   5  -4   0 4450.24 132.779   2
  -5   4  -1 19485.8 446.129   1
   5  -4   1 19709.9 447.818   1
  -5   4  -2 5599.52 204.769   1
   5  -4   2 5875.57 208.055   1
  -5   4  -2 5763.10 172.774   2
  -5   4  -3 309.342 43.6364   2
   5  -4   3 265.725 46.8408   1
  -5   4  -3 263.706 46.6539   1
  -5   4  -4 16153.1 423.770   3
  -5   4  -4 15523.8 365.905   1
  -5   4  -4 15306.5 363.429   2
   5  -4   4 15969.5 354.343   1
   5  -4   5 7464.36 226.601   1
  -5   4  -5 8569.58 297.046   3
  -5   4  -5 7872.19 235.166   1
  -5   4  -6 260.416 47.0058   1
  -5   4  -6 271.636 65.4645   3
  -5   4  -7 17064.8 473.666   3
  -5   4  -7 16029.4 370.043   1
  -5   4  -8 51979.5 998.600   3
  -5   4  -8 48108.6 835.110   1
  -5   4  -9 66914.8 1235.51   3
  -5   4  -9 63680.9 1047.75   1
  -5   4 -10 24889.3 649.597   3
  -5   4 -10 22476.8 486.095   1
  -5   4 -11 1394.37 154.618   3
  -5   4 -12 172.866 77.8100   3
  -5   4 -13 430.033 106.150   3
  -5   4 -14 12008.2 511.814   3
  -5   4 -15 37928.3 1019.55   3
  -5   4 -16 27789.2 873.261   3
  -5   4 -17 12734.9 589.372   3
  -5   4 -18 1198.16 203.526   3
  -5   4 -19 62.5308 114.548   3
   5  -3 -18-137.395 112.218   1
   5  -3 -17 2610.88 256.901   1
   5  -3 -16 3511.69 292.715   1
   5  -3 -15 1406.50 188.231   1
   5  -3 -14 200.845 99.8660   1
   5  -3 -13 94.0397 63.3269   1
   5  -3 -13 261.182 55.5117   4
   5  -3 -12 1129.32 96.9865   4
   5  -3 -12 1106.60 150.173   1
   5  -3 -11 361.662 87.1301   1
   5  -3 -11 460.400 62.5109   4
   5  -3 -10 18743.9 586.853   1
   5  -3 -10 18676.8 413.122   4
   5  -3  -9 26350.6 694.555   1
   5  -3  -9 25564.8 498.101   4
   5  -3  -8 8890.68 359.103   1
   5  -3  -8 8450.17 230.074   4
   5  -3  -7 2407.36 180.343   1
   5  -3  -7 2238.00 104.477   4
   5  -3  -6 14444.1 446.165   1
   5  -3  -6 13861.9 300.245   4
  -5   3   6 14650.5 295.851   4
   5  -3  -5 31103.5 688.680   1
   5  -3  -5 29818.3 519.149   4
  -5   3   5 29735.2 501.186   4
   5  -3  -4 13059.7 393.832   1
   5  -3  -4 13298.6 287.261   4
  -5   3   4 12794.6 270.844   4
   5  -3  -3 106.885 48.7055   1
  -5   3   3 205.631 32.9860   4
   5  -3  -3 194.883 34.4568   4
   5  -3  -2 4169.52 193.281   1
  -5   3   2 4449.29 153.100   4
  -5   3   1 5215.10 205.593   1
   5  -3  -1 5347.61 211.200   1
  -5   3   1 5000.40 178.160   4
  -5   3   0 13703.8 338.321   1
  -5   3   0 12943.5 331.336   4
   5  -3   0 13487.0 343.836   1
  -5   3  -1 90770.1 1386.20   1
   5  -3   1 92576.0 1390.85   1
  -5   3  -1 94410.5 1439.24   4
  -5   3  -1 91003.3 1273.37   2
  -5   3  -2 186601. 2586.10   1
   5  -3   2 185044. 2588.34   1
  -5   3  -2 185766. 2523.22   2
  -5   3  -3 108004. 1569.73   1
  -5   3  -3 110095. 1695.19   3
   5  -3   3 109003. 1564.00   1
  -5   3  -4 16948.9 439.829   3
  -5   3  -4 16782.1 339.004   1
   5  -3   4 16602.9 328.522   1
  -5   3  -5 2897.74 171.612   3
   5  -3   5 2159.60 99.2295   1
  -5   3  -5 2609.61 106.205   1
  -5   3  -6 2170.26 156.306   3
  -5   3  -6 2020.53 91.9673   1
  -5   3  -7 22992.5 580.663   3
  -5   3  -7 22023.5 402.612   1
  -5   3  -8 85762.7 1466.96   3
  -5   3  -8 82024.8 1206.93   1
  -5   3  -9 113876. 1881.51   3
  -5   3  -9 111539. 1595.79   1
  -5   3 -10 42401.9 933.764   3
  -5   3 -10 41138.0 684.248   1
  -5   3 -11 2154.84 192.139   3
  -5   3 -12 179.188 76.6672   3
  -5   3 -13 616.951 126.621   3
  -5   3 -14 6114.43 364.142   3
  -5   3 -15 13552.4 575.743   3
  -5   3 -16 9786.35 502.634   3
  -5   3 -17 812.316 166.903   3
  -5   3 -18 1711.84 230.691   3
   5  -2 -18 358.708 121.770   1
   5  -2 -17 335.436 114.551   1
   5  -2 -16 7213.19 420.848   1
   5  -2 -15 1793.66 208.016   1
   5  -2 -14 793.432 98.6554   4
   5  -2 -14 883.229 148.127   1
   5  -2 -13 15063.6 560.509   1
   5  -2 -13 14938.1 433.681   4
   5  -2 -12 23088.4 693.232   1
   5  -2 -12 22666.6 544.081   4
   5  -2 -11 23754.7 684.381   1
   5  -2 -11 23034.8 530.441   4
   5  -2 -10 6326.30 321.238   1
   5  -2 -10 6556.64 240.073   4
   5  -2  -9 271.621 77.5103   1
   5  -2  -9 261.141 50.3370   4
   5  -2  -8 232.779 76.7465   1
   5  -2  -8 201.516 43.0334   4
   5  -2  -7 3175.77 204.277   1
  -5   2   7 3354.91 145.253   4
   5  -2  -7 3333.38 149.382   4
   5  -2  -6 81988.5 1415.49   1
   5  -2  -6 80428.8 1254.09   4
  -5   2   6 82959.1 1240.24   4
   5  -2  -5 198162. 2885.76   1
   5  -2  -5 193051. 2725.91   4
  -5   2   5 195594. 2702.48   4
   5  -2  -4 147286. 2219.00   1
   5  -2  -4 145409. 2097.06   4
  -5   2   4 147720. 2074.87   4
   5  -2  -3 39610.6 767.292   1
   5  -2  -3 38650.9 695.392   4
  -5   2   3 40189.0 679.387   4
   5  -2  -2 1033.35 97.5670   1
   5  -2  -2 979.659 86.0418   4
  -5   2   2 1010.82 79.0061   4
   5  -2  -1 3559.58 163.582   1
   5  -2  -1 3324.13 156.946   4
  -5   2   1 3694.01 159.687   4
   5  -2   0 14300.8 343.457   1
  -5   2   0 13904.6 357.962   4
   5  -2   1 125510. 1815.77   1
  -5   2  -1 127597. 1892.38   3
  -5   2  -1 126509. 1897.07   4
  -5   2  -2 188813. 2682.81   3
  -5   2  -2 185478. 2702.20   4
   5  -2   2 184203. 2552.21   1
  -5   2  -3 68294.8 1144.54   3
   5  -2   3 67182.6 984.245   1
  -5   2  -4 6330.58 251.433   3
   5  -2   4 6105.55 139.891   1
  -5   2  -5 3093.54 178.870   3
  -5   2  -6 1100.79 116.948   3
  -5   2  -7 1751.04 148.639   3
  -5   2  -8 19895.5 560.918   3
  -5   2  -9 18547.2 553.464   3
  -5   2 -10 117.142 70.4237   3
  -5   2 -11 7849.33 371.528   3
  -5   2 -12 1755.91 187.942   3
  -5   2 -13 314.646 105.796   3
  -5   2 -14 32.2403 83.1735   3
  -5   2 -15 211.357 108.268   3
  -5   2 -16 552.304 145.329   3
  -5   2 -17 2615.73 279.327   3
  -5   2 -18 3927.34 345.196   3
   5  -1 -18 16579.1 688.029   1
   5  -1 -17 6002.83 392.647   1
   5  -1 -16 663.327 131.790   1
   5  -1 -15 52.2113 85.7885   1
   5  -1 -15 12.7082 42.8893   4
   5  -1 -14 1377.07 176.345   1
   5  -1 -14 1462.28 142.285   4
   5  -1 -13 15822.8 575.935   1
   5  -1 -13 14945.0 461.509   4
   5  -1 -12 65467.7 1346.97   1
   5  -1 -12 63839.2 1175.06   4
   5  -1 -11 79793.5 1512.96   1
   5  -1 -11 77846.5 1339.12   4
   5  -1 -10 21276.0 520.360   4
   5  -1  -9 1439.28 113.615   4
   5  -1  -8 58.1276 38.6571   4
  -5   1   8 37.9434 26.1119   4
   5  -1  -7 4243.74 185.595   4
  -5   1   7 4299.56 182.178   4
  -5   1   7 4225.93 189.873   3
   5  -1  -6 37164.4 701.952   4
  -5   1   6 37113.4 685.367   4
   5  -1  -5 90206.0 1411.20   4
  -5   1   5 90906.0 1388.95   4
  -5   1   4 56767.5 943.952   4
   5  -1  -4 56426.0 960.212   4
   5  -1  -4 57075.8 838.659   2
  -5   1   3 1717.67 108.315   4
   5  -1  -3 1594.27 113.113   4
   5  -1  -3 1511.00 56.9063   2
   5  -1  -2 9574.55 294.590   4
  -5   1   2 10028.9 289.319   4
   5  -1  -1 4168.17 173.426   1
   5  -1  -1 4204.60 187.638   4
  -5   1   1 3862.44 174.539   4
   5  -1   0 261.108 50.1359   1
   5  -1   0 286.992 63.3525   4
  -5   1   0 275.404 54.6170   4
  -5   1   0 260.231 53.8890   3
   5  -1   1 20346.7 410.231   1
  -5   1  -1 21387.2 475.990   3
  -5   1  -1 21646.2 502.005   4
   5  -1   2 11018.7 246.281   1
  -5   1  -2 11435.7 332.988   3
  -5   1  -3 49.2089 40.5227   3
   5  -1   3 57.0955 18.0371   1
  -5   1  -4 29472.9 644.378   3
  -5   1  -5 36696.3 767.623   3
  -5   1  -6 2289.79 164.633   3
  -5   1  -7 1096.09 124.602   3
  -5   1  -8 46.6106 57.5265   3
  -5   1  -9 630.403 110.738   3
  -5   1 -10 882.297 128.917   3
  -5   1 -11 5129.65 310.705   3
  -5   1 -12 5278.76 327.710   3
  -5   1 -13 2.40831 91.0724   3
  -5   1 -14 861.910 157.226   3
  -5   1 -15 2331.42 259.836   3
  -5   1 -16 1614.32 225.115   3
  -5   1 -17 742.547 161.606   3
   5   0 -18 17490.2 716.374   1
   5   0 -17 6097.53 398.430   1
   5   0 -16 603.489 144.082   1
   5   0 -16 581.700 107.177   4
   5   0 -15 725.806 140.581   1
   5   0 -15 824.874 122.027   4
   5   0 -14 1648.70 161.852   4
   5   0 -13 4715.53 258.437   4
   5   0 -12 19173.2 545.660   4
   5   0 -11 13334.8 424.196   4
   5   0 -10 747.730 95.6639   4
   5   0  -9 11809.2 372.619   4
   5   0  -8 10576.4 338.771   4
  -5   0   8 10218.4 313.206   3
   5   0  -7 3653.12 187.339   4
  -5   0   7 3443.65 160.148   3
   5   0  -6 1099.31 102.263   4
   5   0  -6 1269.31 86.9858   2
   5   0  -5 2671.41 155.531   4
   5   0  -5 2418.58 109.964   2
   5   0  -4 408.568 68.6179   4
   5   0  -4 334.996 39.1338   2
   5   0  -3 31898.0 655.969   4
  -5   0   3 32739.0 652.104   4
   5   0  -2 37247.8 738.211   4
  -5   0   2 37987.6 726.764   4
  -5   0   1 2755.89 138.264   3
  -5   0   1 2879.92 89.4376   2
   5   0  -1 2949.81 169.266   4
  -5   0   0 2378.85 132.136   3
   5   0   0 2298.90 151.164   4
   5   0   1 1491.50 128.458   4
  -5   0  -1 1388.80 107.617   3
  -5   0  -2 2699.93 155.358   3
   5   0   2 2942.33 179.025   4
   5   0   3 9243.80 198.367   1
  -5   0  -3 9531.51 313.694   3
  -5   0  -4 11394.1 362.668   3
  -5   0  -5 5320.84 249.630   3
  -5   0  -6 27.8405 52.3059   3
  -5   0  -7 20.1147 52.7164   3
  -5   0  -8 4810.11 269.666   3
  -5   0  -9 16278.1 544.386   3
  -5   0 -10 14479.5 532.829   3
  -5   0 -11-94.2080 93.4557   3
  -5   0 -12 1390.94 182.042   3
  -5   0 -13-91.5494 92.9697   3
  -5   0 -14 310.427 119.564   3
  -5   0 -15 4020.64 334.758   3
  -5   0 -16 6408.71 430.691   3
  -5   0 -17 1868.32 243.565   3
   5   1 -18 2167.74 248.172   1
   5   1 -17-56.5839 82.3067   4
   5   1 -16 4440.84 288.214   4
   5   1 -15 5919.95 329.284   4
   5   1 -14 542.732 100.625   4
   5   1 -13 161.357 77.9589   4
   5   1 -12 2340.85 188.591   4
   5   1 -11 269.463 72.2396   4
   5   1 -10 5263.88 263.394   4
  -5  -1  10 4723.05 214.948   3
   5   1  -9 13261.3 422.187   4
  -5  -1   9 13029.3 355.307   3
   5   1  -8 7993.74 310.173   4
  -5  -1   8 7893.14 249.979   3
   5   1  -7 1116.12 116.032   4
   5   1  -7 1105.42 93.6068   2
  -5  -1   7 1090.62 83.0117   3
   5   1  -6 1033.78 107.056   4
   5   1  -6 998.675 82.5116   2
   5   1  -5 14354.1 408.516   4
   5   1  -5 13379.2 324.427   2
   5   1  -4 15932.1 437.099   4
   5   1  -3 75.8320 46.5688   4
  -5  -1   3 212.541 40.9073   3
  -5  -1   2 750.742 71.8189   3
   5   1  -2 612.980 87.6250   4
  -5  -1   2 785.484 61.4306   2
  -5  -1   1 1946.97 115.253   3
   5   1  -1 2046.24 146.526   4
  -5  -1   1 1823.30 89.6533   2
  -5  -1   0 2923.72 148.224   3
   5   1   0 3368.32 192.484   4
  -5  -1  -1 7331.11 255.391   3
   5   1   1 7285.13 295.652   4
  -5  -1  -2 42503.6 814.094   3
   5   1   2 43476.7 884.627   4
  -5  -1  -3 32412.6 681.834   3
   5   1   3 30977.7 525.789   1
   5   1   3 32940.5 737.747   4
  -5  -1  -4 7581.33 293.703   3
   5   1   4 7494.73 165.781   1
  -5  -1  -5 225.591 71.8684   3
  -5  -1  -6 715.622 108.068   3
  -5  -1  -7 1533.11 158.787   3
  -5  -1  -8 3427.96 237.899   3
  -5  -1  -9 21392.9 660.502   3
  -5  -1 -10 7806.24 392.484   3
  -5  -1 -11 1206.78 173.353   3
  -5  -1 -12 447.481 110.377   3
  -5  -1 -13 296.559 115.612   3
  -5  -1 -14 56.6461 98.4771   3
  -5  -1 -15 52.7163 96.7836   3
  -5  -1 -16 479.039 135.881   3
   5   2 -18 147.175 96.4790   4
   5   2 -17-22.5000 88.9409   4
   5   2 -16 2661.47 237.889   4
   5   2 -15 951.262 143.216   4
   5   2 -14 454.615 96.1460   4
   5   2 -13-20.2293 58.1725   4
   5   2 -12 1285.64 147.699   4
   5   2 -11 12583.6 453.919   4
   5   2 -10 7708.04 344.827   4
  -5  -2   9 63.1700 41.5322   3
   5   2  -9-32.0380 51.4658   4
   5   2  -8 704.879 104.875   4
  -5  -2   8 620.955 63.6492   3
   5   2  -7 4200.68 229.490   4
  -5  -2   7 3846.84 147.595   3
  -5  -2   6 523.223 50.3440   3
   5   2  -6 544.982 86.1684   4
  -5  -2   5 20144.1 392.714   3
   5   2  -5 20033.0 535.360   4
  -5  -2   4 34377.9 598.688   3
   5   2  -4 34448.1 753.738   4
  -5  -2   3 20760.8 423.376   3
   5   2  -3 19977.5 532.582   4
  -5  -2   3 21241.8 441.951   2
  -5  -2   2 70.4350 29.6760   2
  -5  -2   2 44.1557 25.5246   3
   5   2  -2 131.059 61.9721   4
  -5  -2   1 423.770 61.0576   3
   5   2  -1 381.704 75.3583   4
  -5  -2   1 315.495 47.3981   2
  -5  -2   0 7945.64 262.641   3
   5   2   0 8424.72 325.881   4
  -5  -2  -1 1728.58 123.670   3
   5   2   1 1855.06 155.181   4
  -5  -2  -2 15117.9 417.207   3
   5   2   2 14764.0 347.266   1
   5   2   2 15618.3 474.371   4
  -5  -2  -3 5222.31 241.344   3
   5   2   3 5390.85 271.211   4
   5   2   3 4895.70 165.533   1
  -5  -2  -4 1297.89 127.002   3
   5   2   4 1286.79 75.4658   1
  -5  -2  -5 9205.64 360.263   3
   5   2   5 9230.02 214.111   1
  -5  -2  -6 7336.89 336.757   3
   5   2   6 7797.98 173.296   1
  -5  -2  -7 564.956 107.369   3
  -5  -2  -8 2797.95 223.861   3
  -5  -2  -9 398.527 102.901   3
  -5  -2 -10 323.748 103.201   3
  -5  -2 -11 5636.15 372.473   3
  -5  -2 -12 3631.73 310.395   3
  -5  -2 -13 1116.87 179.539   3
  -5  -2 -14 516.064 142.684   3
  -5  -2 -15-113.796 106.490   3
  -5  -2 -16 2085.92 259.631   3
   5   3 -18 4582.33 345.514   4
   5   3 -17 3272.52 282.826   4
   5   3 -16 581.059 118.366   4
   5   3 -15 376.898 104.480   4
   5   3 -14 1130.85 161.242   4
   5   3 -13 92.9343 64.7553   4
   5   3 -12 2226.25 204.513   4
   5   3 -11 12332.3 468.681   4
   5   3 -10 4991.95 289.213   4
   5   3  -9 72.9493 61.7127   4
  -5  -3   9 10.3087 13.9721   3
  -5  -3   8 312.672 31.4528   3
   5   3  -8 374.362 82.7400   4
  -5  -3   8 183.087 34.7989   3
  -5  -3   7 1103.53 60.9373   3
   5   3  -7 1139.56 132.211   4
  -5  -3   7 1087.76 64.6992   3
  -5  -3   6 46.1025 19.4636   3
   5   3  -6 25.8566 50.2098   4
  -5  -3   5 3266.14 120.502   3
   5   3  -5 3528.02 216.206   4
  -5  -3   4 3106.94 125.929   3
   5   3  -4 3122.78 202.220   4
  -5  -3   3 2672.57 124.974   3
   5   3  -3 2670.35 183.318   4
  -5  -3   3 2407.79 138.538   2
  -5  -3   2 15626.6 368.787   3
   5   3  -2 15645.5 481.631   4
  -5  -3   2 15585.7 389.736   2
  -5  -3   1 11554.7 321.428   3
   5   3  -1 10996.2 394.903   4
  -5  -3   1 11061.4 316.950   2
  -5  -3   0 68.1618 37.0351   3
   5   3   0 151.774 65.4391   4
   5   3   0 342.056 54.0266   3
  -5  -3  -1 1535.43 124.253   3
   5   3   1 1522.33 112.502   1
   5   3   1 1617.09 150.725   4
   5   3   2 413.284 59.3594   1
  -5  -3  -2 484.073 80.0541   3
   5   3   2 403.095 85.2186   4
   5   3   3 433.041 57.2929   1
  -5  -3  -3 313.925 71.7427   3
   5   3   3 582.591 102.421   4
  -5  -3  -4 3004.75 203.588   3
   5   3   4 3124.25 219.505   4
   5   3   4 3020.31 139.610   1
  -5  -3  -5 17614.4 544.127   3
   5   3   5 17213.9 376.481   1
  -5  -3  -6 2475.99 205.017   3
   5   3   6 2410.12 112.999   1
  -5  -3  -7 603.328 118.045   3
  -5  -3  -8 3616.10 269.195   3
  -5  -3  -9 5752.94 349.118   3
  -5  -3 -10 17336.1 657.549   3
  -5  -3 -11 3680.27 300.136   3
  -5  -3 -12 809.967 155.368   3
  -5  -3 -13-16.5844 87.3800   3
  -5  -3 -14 62.9061 101.422   3
  -5  -3 -15 8244.09 497.050   3
   5   4 -17 1214.87 183.156   4
   5   4 -16 25.8468 78.3321   4
   5   4 -15 1152.23 166.719   4
   5   4 -14-82.0303 81.0863   4
   5   4 -13 631.721 129.095   4
   5   4 -12 90.1910 69.6474   4
   5   4 -11 820.843 134.190   4
   5   4 -10 1013.84 143.227   4
   5   4  -9 11139.6 444.250   4
   5   4  -8 9067.84 389.094   4
   5   4  -7 1896.05 173.279   4
   5   4  -6 2289.81 189.610   4
  -5  -4   5 148.259 26.6541   3
   5   4  -5 246.582 77.1386   4
  -5  -4   4 10866.1 266.005   3
   5   4  -4 10039.7 398.086   4
  -5  -4   4 10392.9 339.117   2
  -5  -4   3 1160.39 86.8851   3
   5   4  -3 1026.64 127.361   4
  -5  -4   3 1072.81 101.690   2
  -5  -4   2 6881.12 238.370   3
   5   4  -2 6531.79 313.449   4
  -5  -4   2 6683.92 260.205   2
  -5  -4   1 3747.77 183.464   3
   5   4  -1 3622.03 232.502   4
  -5  -4   1 3348.40 181.834   2
  -5  -4   0 2970.12 173.390   3
   5   4   0 2964.02 210.256   4
  -5  -4  -1 3465.90 198.538   3
   5   4   1 3308.35 222.187   4
  -5  -4  -2 22928.2 594.276   3
   5   4   2 22887.6 644.284   4
  -5  -4  -3 59460.7 1158.99   3
   5   4   3 60734.9 1212.23   4
   5   4   3 58208.2 1019.93   1
  -5  -4  -4 20726.0 603.531   3
   5   4   4 21495.7 630.898   4
   5   4   4 20234.6 473.519   1
  -5  -4  -5 1111.98 146.608   3
   5   4   5 1134.52 96.4451   1
   5   4   5 927.321 129.719   4
  -5  -4  -6 406.064 109.500   3
  -5  -4  -7 268.007 91.1326   3
  -5  -4  -8 16747.7 611.874   3
  -5  -4  -9 61187.5 1372.37   3
  -5  -4 -10 78362.8 1654.40   3
  -5  -4 -11 30117.7 922.692   3
  -5  -4 -12 4766.50 357.099   3
  -5  -4 -13 1.92040 84.5263   3
  -5  -4 -14 1065.28 188.761   3
   5   5 -16 1563.91 210.141   4
   5   5 -15 5547.25 378.673   4
   5   5 -14 1269.53 178.112   4
   5   5 -13-94.4521 95.0685   4
   5   5 -12 1295.82 173.975   4
   5   5 -11 5313.08 330.416   4
   5   5 -10 2998.21 245.651   4
   5   5  -9 200.025 73.6601   4
   5   5  -8 3140.54 238.795   4
   5   5  -7 534.522 110.897   4
   5   5  -6 6038.16 325.650   4
   5   5  -5 29507.2 775.555   4
   5   5  -4 68512.5 1357.22   4
  -5  -5   4 68211.4 1240.03   2
  -5  -5   4 69490.0 1044.83   3
  -5  -5   3 66871.4 1065.77   3
   5   5  -3 65008.8 1308.49   4
  -5  -5   3 65181.2 1187.03   2
  -5  -5   2 13850.8 371.795   3
   5   5  -2 13380.1 485.099   4
  -5  -5   2 13414.4 417.486   2
  -5  -5   1 370.615 68.2474   3
   5   5  -1 318.795 79.2028   4
   5   5  -1 345.405 56.5434   3
  -5  -5   1 197.811 51.4632   2
  -5  -5   0 232.550 67.0820   3
   5   5   0 271.994 84.0717   4
  -5  -5  -1 20373.3 556.608   3
   5   5   1 20100.0 620.170   4
  -5  -5  -2 90251.3 1594.66   3
   5   5   2 90443.3 1665.22   4
  -5  -5  -3 112733. 1933.88   3
   5   5   3 113481. 1985.27   4
  -5  -5  -4 67085.9 1336.51   3
   5   5   4 68052.7 1377.96   4
  -5  -5  -5 18134.6 600.224   3
   5   5   5 18894.5 621.255   4
  -5  -5  -6 135.321 68.5841   3
  -5  -5  -7 966.435 153.621   3
  -5  -5  -8 9267.11 454.520   3
  -5  -5  -9 30286.6 895.989   3
  -5  -5 -10 29148.1 905.706   3
  -5  -5 -11 9396.72 494.868   3
  -5  -5 -12 391.300 127.018   3
  -5  -5 -13 111.875 109.317   3
   5   6 -15-101.497 74.4541   4
   5   6 -14 417.460 119.543   4
   5   6 -13 2920.49 277.543   4
   5   6 -12 10502.0 504.568   4
   5   6 -11 39093.6 1044.04   4
   5   6 -10 46410.9 1146.07   4
   5   6  -9 14433.2 563.720   4
   5   6  -8 1608.36 185.412   4
   5   6  -7 339.516 94.7877   4
   5   6  -6 8098.01 398.223   4
   5   6  -5 45971.2 1076.05   4
   5   6  -4 93573.4 1739.27   4
  -5  -6   4 93051.1 1623.03   2
   5   6  -3 71610.7 1418.57   4
  -5  -6   3 69374.0 1297.87   2
   5   6  -2 17338.3 587.335   4
  -5  -6   2 17117.9 516.213   2
  -5  -6   2 18214.0 440.926   3
   5   6  -1-66.0919 76.4790   4
  -5  -6   1 23.7553 39.4518   3
  -5  -6   1-50.6455 70.7598   2
  -5  -6   0 444.036 81.9565   3
   5   6   0 388.779 92.1181   4
   5   6   1 2408.68 210.336   4
  -5  -6  -1 2199.88 172.207   3
   5   6   2 23210.9 699.237   4
  -5  -6  -2 22937.2 634.727   3
   5   6   3 33503.9 875.933   4
  -5  -6  -3 32745.7 816.040   3
   5   6   4 9339.20 434.105   4
  -5  -6  -4 9835.74 420.173   3
  -5  -6  -5 51.0503 65.4785   3
   5   6   5-10.6220 68.7011   4
  -5  -6  -6 2380.13 222.719   3
  -5  -6  -7 36.4466 74.4551   3
  -5  -6  -8 210.293 94.6485   3
  -5  -6  -9 730.120 148.875   3
  -5  -6 -10 1660.67 212.117   3
  -5  -6 -11 72.4465 101.684   3
  -5  -6 -12 2210.24 255.055   3
   5   7 -13 951.085 170.001   4
   5   7 -12 11937.5 571.083   4
   5   7 -11 27678.4 884.794   4
   5   7 -10 24118.9 802.699   4
   5   7  -9 9297.00 467.516   4
   5   7  -8 111.448 70.5435   4
   5   7  -7 975.123 154.849   4
   5   7  -6 204.374 86.4248   4
   5   7  -5 3619.72 274.067   4
  -5  -7   5 2864.15 217.021   2
   5   7  -4 11250.0 486.971   4
  -5  -7   4 11256.8 431.742   2
   5   7  -3 4040.31 283.573   4
  -5  -7   3 4069.31 249.566   2
   5   7  -2 817.187 139.620   4
  -5  -7   2 949.029 128.020   2
   5   7  -1 3313.09 255.970   4
  -5  -7   1 3131.76 219.682   2
  -5  -7   0 620.280 92.6497   3
   5   7   0 816.108 132.732   4
  -5  -7   0 802.404 116.923   2
  -5  -7  -1-15.8883 44.9192   3
   5   7   1 261.004 101.927   4
  -5  -7  -2 242.979 79.3637   3
   5   7   2 354.905 102.564   4
   5   7   3 3218.85 256.815   4
  -5  -7  -3 3351.37 238.700   3
  -5  -7  -4 125.801 82.8441   3
   5   7   4 110.632 75.7537   4
   5   7   5 4821.55 324.652   4
  -5  -7  -5 4726.65 306.830   3
   5   7   6 1716.32 201.215   4
  -5  -7  -6 1409.64 177.171   3
  -5  -7  -7 140.403 84.1471   3
  -5  -7  -8 367.099 121.461   3
  -5  -7  -9 593.839 140.297   3
  -5  -7 -10 4408.83 347.081   3
  -5  -7 -11 2529.84 268.923   3
   5   8 -11 3739.69 319.321   4
   5   8 -10 712.817 150.685   4
   5   8  -9 326.279 107.117   4
   5   8  -8 4021.41 314.310   4
   5   8  -7 2263.05 234.110   4
   5   8  -6 81.0413 75.7898   4
  -5  -8   5 14.5105 59.7532   2
   5   8  -5 40.6117 66.6767   4
   5   8  -4 2314.00 230.155   4
  -5  -8   4 2571.07 217.353   2
  -5  -8   3 825.952 125.755   2
   5   8  -3 769.446 140.951   4
  -5  -8   2 616.514 114.735   2
   5   8  -2 493.655 119.371   4
   5   8  -1 1825.56 205.462   4
  -5  -8   1 1494.63 165.204   2
   5   8   0 540.183 128.693   4
  -5  -8   0 537.682 109.315   2
   5   8   1-2.13196 78.5065   4
   5   8   2 1792.70 205.582   4
  -5  -8  -2 2002.51 181.798   3
   5   8   3 10002.7 481.958   4
  -5  -8  -3 10576.3 438.873   3
   5   8   4 5912.88 370.815   4
  -5  -8  -4 5747.13 333.579   3
   5   8   5 898.165 159.712   4
  -5  -8  -5 921.758 147.970   3
  -5  -8  -6 292.279 98.0495   3
   5   8   6 206.082 96.6942   4
  -5  -8  -7 76.3507 74.6183   3
  -5  -8  -8 537.350 139.592   3
  -5  -8  -9 4602.30 351.813   3
  -5  -8 -10 10049.0 539.068   3
   5   9  -8 1072.67 184.086   4
   5   9  -7 13.0605 69.0942   4
   5   9  -6-3.00535 66.3667   4
  -5  -9   5 1135.77 164.690   2
   5   9  -5 1093.23 177.607   4
   5   9  -4 8821.96 470.498   4
  -5  -9   4 7855.51 410.865   2
   5   9  -3 15456.3 631.133   4
  -5  -9   3 14638.8 563.365   2
   5   9  -2 6375.13 398.028   4
  -5  -9   2 5830.78 348.391   2
   5   9  -1 480.671 122.035   4
  -5  -9   1 287.996 96.0260   2
   5   9   0-6.36111 70.7959   4
  -5  -9   0-9.39910 70.7338   2
   5   9   1-38.3688 69.9029   4
  -5  -9  -1 55.0994 71.3324   2
   5   9   2 3262.69 283.916   4
   5   9   3 8186.39 453.270   4
   5   9   4 8615.29 479.288   4
   5   9   5 480.577 129.453   4
  -5  -9  -6 932.124 154.866   3
   5   9   6 1192.78 181.275   4
  -5  -9  -7 153.873 83.1683   3
  -5  -9  -8 368.671 124.131   3
  -5  -9  -9-78.9017 105.331   3
  -5 -10   5 162.519 78.1665   2
  -5 -10   4 2791.72 259.662   2
   5  10  -3 5296.16 374.727   4
  -5 -10   3 4521.24 326.293   2
  -5 -10   2 261.199 91.3753   2
   5  10  -2 181.862 87.9883   4
  -5 -10   1 1233.70 174.993   2
   5  10  -1 1108.72 179.135   4
   5  10   0 196.699 89.5098   4
  -5 -10   0 71.3097 67.3570   2
   5  10   1-32.1602 88.4712   4
  -5 -10  -1 256.229 102.069   2
   5  10   2 517.950 139.956   4
  -5 -10  -2 383.344 107.186   2
   5  10   3 46.2080 86.2648   4
   5  10   4 73.8659 81.1917   4
   5  10   5 1390.92 212.947   4
   5  10   6 3139.82 302.640   4
   6 -14  -4 2644.89 258.955   2
   6 -14  -3 23922.8 810.101   2
   6 -14  -2 49581.8 1314.90   1
   6 -14  -2 44903.0 1174.10   2
   6 -14  -1 34185.9 1049.94   1
   6 -14  -1 30546.3 925.330   2
   6 -14   0 8952.71 510.537   1
   6 -14   0 8764.77 456.309   2
   6 -14   1 897.497 147.284   2
   6 -14   1 1161.83 191.962   1
   6 -14   2-104.561 105.459   2
   6 -14   2 40.1584 89.9471   1
   6 -14   3 2891.62 291.260   1
   6 -14   3 2348.35 240.510   2
   6 -14   4 12713.6 608.181   1
  -6  14  -5 21467.1 684.747   4
  -6  14  -6 10226.3 467.475   4
  -6  14  -7 1457.92 182.858   4
  -6  14  -8 798.811 144.199   4
  -6  14  -9 790.601 152.552   4
   6 -13  -7 11463.5 578.074   1
   6 -13  -6 1065.28 183.641   1
   6 -13  -5-77.9887 100.685   1
   6 -13  -4 194.595 94.5950   1
   6 -13  -3 5830.06 356.420   2
   6 -13  -3 6579.33 421.653   1
   6 -13  -2 13832.8 560.878   2
   6 -13  -2 13994.7 617.344   1
   6 -13  -1 10950.3 539.913   1
   6 -13  -1 10640.1 482.207   2
   6 -13   0 1046.70 153.695   2
   6 -13   0 1054.21 171.120   1
   6 -13   1-37.7200 74.7170   2
   6 -13   1 63.3689 80.9583   1
   6 -13   2 351.364 99.4570   2
   6 -13   2 505.137 122.354   1
   6 -13   3 4228.35 330.953   1
  -6  13  -3 3710.12 239.384   4
   6 -13   3 3875.22 285.250   2
   6 -13   4 1025.13 168.870   1
  -6  13  -4 1131.58 135.856   4
  -6  13  -5 201.108 67.3719   4
   6 -13   5 280.547 109.458   1
  -6  13  -6-66.2356 84.4560   4
  -6  13  -7 320.511 100.752   4
  -6  13  -8 148.797 88.6546   4
  -6  13  -9 1672.07 202.644   4
  -6  13 -10 4069.95 323.020   4
   6 -12 -10 374.060 123.536   1
   6 -12  -9 2219.36 249.376   1
   6 -12  -8 3649.96 315.773   1
   6 -12  -7 30.0583 86.6571   1
   6 -12  -6 245.123 103.083   1
   6 -12  -5 630.000 143.389   1
   6 -12  -4 7736.33 439.773   1
   6 -12  -3 3969.29 271.205   2
   6 -12  -3 4458.04 329.522   1
   6 -12  -2 689.810 135.726   1
   6 -12  -2 661.374 115.228   2
   6 -12  -1 134.903 77.2017   1
   6 -12  -1 68.0049 72.8827   2
   6 -12   0 443.644 113.096   1
   6 -12   0 306.031 94.0031   2
   6 -12   1 577.691 108.317   2
   6 -12   1 369.387 109.037   1
  -6  12  -1 676.848 93.3790   4
   6 -12   2 2410.04 238.857   1
  -6  12  -2 2257.97 171.908   4
   6 -12   2 2161.67 199.084   2
   6 -12   3 7102.63 400.988   1
  -6  12  -3 7118.68 325.006   4
   6 -12   3 6656.64 354.093   2
   6 -12   4 98.3534 81.3195   1
  -6  12  -4 11.8376 56.4371   4
   6 -12   5 453.027 123.403   1
  -6  12  -5 295.040 76.5737   4
  -6  12  -6 302.897 80.2109   4
  -6  12  -7 579.341 103.171   3
  -6  12  -7 684.429 127.679   4
  -6  12  -8 2075.51 210.124   4
  -6  12  -9-47.6424 67.1362   4
  -6  12 -10-3.49725 63.8588   4
  -6  12 -11 3867.30 316.471   4
   6 -11 -11 3346.20 305.520   1
   6 -11 -10 6235.65 410.507   1
   6 -11  -9 1039.43 174.486   1
   6 -11  -8 236.197 102.950   1
   6 -11  -7 1645.87 209.464   1
   6 -11  -6 1642.82 198.838   1
   6 -11  -5 124.608 87.4569   1
   6 -11  -4 1015.22 153.729   1
   6 -11  -3 442.966 114.955   1
   6 -11  -2 1516.99 158.522   2
   6 -11  -2 1734.42 194.921   1
   6 -11  -1 6781.86 327.873   2
   6 -11  -1 6696.32 377.728   1
   6 -11   0 413.017 104.650   1
  -6  11   0 440.411 71.9078   4
   6 -11   0 242.981 71.1291   2
   6 -11   1 1802.60 191.201   1
  -6  11  -1 2125.49 153.728   4
   6 -11   1 1786.16 167.916   2
   6 -11   2 694.885 108.378   2
   6 -11   2 413.626 107.085   1
  -6  11  -2 552.874 85.8767   4
   6 -11   3 1686.23 186.997   1
  -6  11  -3 1582.27 146.907   4
   6 -11   3 1408.41 154.679   2
   6 -11   4 4486.88 298.585   1
  -6  11  -4 4372.93 251.512   4
   6 -11   5 12905.0 517.519   1
  -6  11  -5 12617.0 460.891   4
   6 -11   6 9050.58 432.923   1
  -6  11  -6 9846.92 410.406   4
  -6  11  -7 50.7095 50.3542   3
  -6  11  -7 16.8060 57.4792   4
  -6  11  -8 2305.75 184.027   3
  -6  11  -8 2147.05 211.069   4
  -6  11  -9 652.500 104.596   3
  -6  11  -9 555.491 115.946   4
  -6  11 -10 621.042 187.515   4
  -6  11 -11 3409.47 287.431   4
  -6  11 -12 3376.24 290.551   4
   6 -10 -13 203.178 106.375   1
   6 -10 -12 1118.92 180.649   1
   6 -10 -11 336.620 113.661   1
   6 -10 -10 59.3237 77.0986   1
   6 -10  -9 3159.43 279.708   1
   6 -10  -8 5355.47 354.348   1
   6 -10  -7 2214.14 225.370   1
   6 -10  -6 45.9820 75.3360   1
   6 -10  -5 2235.39 221.317   1
   6 -10  -4 743.170 131.941   1
   6 -10  -3 3377.60 259.026   1
  -6  10   2 18591.5 397.178   4
   6 -10  -2 17215.3 521.510   2
   6 -10  -2 17180.0 604.985   1
  -6  10   1 19117.4 435.655   4
   6 -10  -1 18637.5 542.617   2
   6 -10  -1 18449.1 618.040   1
  -6  10   0 2005.78 132.669   4
   6 -10   0 1664.84 151.194   2
   6 -10   0 2152.77 199.628   1
  -6  10  -1 1400.97 119.329   4
   6 -10   1 1215.44 146.699   1
   6 -10   1 1320.28 137.451   2
   6 -10   2 4334.45 280.086   1
  -6  10  -2 4325.36 219.827   4
   6 -10   2 4238.31 242.523   2
   6 -10   3-10.8285 50.1411   2
   6 -10   3 30.0735 59.8636   1
  -6  10  -3 66.5053 39.2344   4
   6 -10   4 57.3705 56.3249   1
  -6  10  -4 21.6371 39.7600   4
   6 -10   5 3397.79 240.862   1
  -6  10  -5 2955.94 206.035   4
  -6  10  -6 3119.02 212.961   3
   6 -10   6 3393.45 248.786   1
  -6  10  -6 3319.36 227.425   4
  -6  10  -7 85.8531 54.6285   3
  -6  10  -7-10.5544 63.1999   4
  -6  10  -8 4.83873 45.7241   3
  -6  10  -8-107.088 80.1377   4
  -6  10  -9 1308.65 143.659   3
  -6  10  -9 1380.81 164.511   4
  -6  10 -10 6243.46 315.510   3
  -6  10 -10 5920.09 356.366   4
  -6  10 -11 3316.40 231.976   3
  -6  10 -11 3107.09 270.330   4
  -6  10 -12 244.922 98.6400   4
  -6  10 -13 1780.05 215.165   4
   6  -9 -14 3171.32 295.392   1
   6  -9 -13 42.6058 87.2144   1
   6  -9 -12 1409.94 193.562   1
   6  -9 -11 280.392 99.2735   1
   6  -9 -10 551.960 127.182   1
   6  -9  -9 4502.80 317.927   1
   6  -9  -8 8829.18 440.972   1
   6  -9  -7 2665.64 234.373   1
   6  -9  -6 1002.00 150.405   1
   6  -9  -5 1913.74 197.643   1
   6  -9  -4 4372.92 287.703   1
  -6   9   3 1933.76 81.9476   4
   6  -9  -3 1925.96 193.455   1
  -6   9   2 170.504 38.9894   4
   6  -9  -2 93.7521 62.9927   1
   6  -9  -1 708.296 118.840   1
  -6   9   1 902.084 78.5601   4
   6  -9  -1 838.218 99.1848   2
   6  -9   0 117.103 65.1089   1
  -6   9   0 96.4089 40.1648   4
   6  -9   0 53.8959 44.3037   2
   6  -9   1 633.829 88.9911   2
   6  -9   1 598.013 107.606   1
  -6   9  -1 660.963 81.3154   4
  -6   9  -2 1508.42 127.867   4
   6  -9   2 1554.88 137.987   2
   6  -9   2 1536.11 156.843   1
   6  -9   3 21828.0 628.440   1
  -6   9  -3 22087.0 563.106   4
   6  -9   4 15383.2 506.563   1
  -6   9  -4 14847.1 458.863   4
   6  -9   5 330.826 87.1446   1
  -6   9  -5 207.752 65.7420   4
  -6   9  -6 1972.04 163.786   3
   6  -9   6 2099.45 180.241   1
  -6   9  -6 1982.80 169.410   4
  -6   9  -7 191.371 61.4046   3
  -6   9  -7 84.9454 52.0440   4
  -6   9  -8 2081.32 173.965   3
  -6   9  -8 2099.75 188.097   4
  -6   9  -9 1876.04 169.001   3
  -6   9  -9 2243.03 206.700   4
  -6   9 -10 8475.24 367.051   3
  -6   9 -10 8197.18 404.321   4
  -6   9 -11 243.557 67.4173   3
  -6   9 -11 357.027 101.637   4
  -6   9 -12 10051.3 424.199   3
  -6   9 -12 9239.41 465.769   4
  -6   9 -13 9944.57 430.793   3
  -6   9 -13 9726.43 492.334   4
  -6   9 -14 4852.91 352.758   4
   6  -8 -15 3586.26 314.332   1
   6  -8 -14 848.441 162.249   1
   6  -8 -13 417.327 115.170   1
   6  -8 -12 763.696 149.352   1
   6  -8 -11 581.161 136.027   1
   6  -8 -10 4937.96 325.342   1
   6  -8  -9 2634.96 236.579   1
   6  -8  -8-31.6336 64.2293   1
   6  -8  -7-50.9510 82.1499   1
   6  -8  -6 720.973 124.645   1
   6  -8  -5 110.680 69.5020   1
   6  -8  -4 12861.6 484.082   1
  -6   8   3 8622.36 191.230   4
  -6   8   3 9261.00 191.339   4
   6  -8  -3 8983.39 389.220   1
  -6   8   2 1584.74 85.9734   4
   6  -8  -2 1452.44 157.137   1
  -6   8   1 6863.98 214.612   4
   6  -8  -1 6699.93 322.205   1
   6  -8  -1 6592.60 260.442   2
  -6   8   0 7415.85 243.368   4
   6  -8   0 7108.96 327.275   1
   6  -8   0 7130.18 269.812   2
  -6   8  -1 2171.58 133.656   4
   6  -8   1 2015.16 170.430   1
   6  -8   1 2079.95 142.643   2
   6  -8   2 5136.24 266.666   1
   6  -8   2 4981.47 228.916   2
   6  -8   3 5838.28 281.526   1
   6  -8   4 216.837 68.9196   1
   6  -8   5 17420.2 510.872   1
  -6   8  -6 47801.8 978.423   3
   6  -8   6 49378.1 993.535   1
  -6   8  -7 32466.3 760.027   3
  -6   8  -8 5237.94 271.876   3
  -6   8  -9 1298.88 137.461   3
  -6   8 -10-130.321 77.1559   3
  -6   8 -11 10789.6 428.045   3
  -6   8 -12 30802.3 811.855   3
  -6   8 -13 34165.8 884.073   3
  -6   8 -14 14874.4 563.500   3
  -6   8 -15 685.636 133.578   3
   6  -7 -16 1752.17 228.589   1
   6  -7 -15-69.6267 82.1877   1
   6  -7 -14-79.8978 93.2171   1
   6  -7 -13 93.8026 75.0027   1
   6  -7 -12 17.2482 72.7687   1
   6  -7 -11 2157.55 220.759   1
   6  -7 -10 6721.07 373.573   1
   6  -7  -9 511.569 114.158   1
   6  -7  -8 12693.0 499.676   1
   6  -7  -7 10501.0 438.153   1
   6  -7  -6 10595.4 433.808   1
   6  -7  -5 2816.42 218.674   1
   6  -7  -4 78.9268 62.8107   1
   6  -7  -3 105.998 63.5096   1
  -6   7   3 89.7358 21.1866   4
  -6   7   3 131.534 21.3310   4
   6  -7  -2 30398.4 741.646   1
  -6   7   2 29713.6 517.478   4
   6  -7  -1 100110. 1708.06   1
   6  -7  -1 99412.3 1541.81   2
   6  -7   0 76277.3 1366.73   1
   6  -7   0 74691.7 1218.09   2
   6  -7   1 17237.7 496.695   1
   6  -7   1 16967.6 418.904   2
   6  -7   2 832.528 102.202   1
   6  -7   3 876.204 104.468   1
   6  -7   4 19547.2 518.492   1
   6  -7   5 44957.5 880.456   1
  -6   7  -5 42725.3 893.835   3
  -6   7  -6 96993.9 1661.24   3
   6  -7   6 100807. 1624.37   1
  -6   7  -7 43572.1 919.835   3
  -6   7  -8 5543.36 278.112   3
  -6   7  -9 2400.85 185.481   3
  -6   7 -10 673.585 103.436   3
  -6   7 -11 117.990 64.3697   3
  -6   7 -12 7626.39 371.878   3
  -6   7 -13 13473.0 518.030   3
  -6   7 -14 3744.24 275.409   3
  -6   7 -15 759.590 135.307   3
  -6   7 -16 1842.35 217.713   3
  -6   7 -17 5288.02 370.221   3
   6  -6 -17 683.337 156.911   1
   6  -6 -16 212.366 103.179   1
   6  -6 -15 5934.23 389.404   1
   6  -6 -14 15024.9 617.463   1
   6  -6 -13 5440.74 354.940   1
   6  -6 -12 87.9395 72.3674   1
   6  -6 -11 63.6213 74.6314   1
   6  -6 -10 1060.70 148.804   1
   6  -6  -9 18692.0 619.695   1
   6  -6  -8 75570.5 1478.98   1
   6  -6  -7 71590.3 1401.98   1
   6  -6  -6 30199.7 773.689   1
   6  -6  -5 327.256 85.7538   1
   6  -6  -4 34.4818 57.6517   1
  -6   6   3 4026.17 119.775   4
   6  -6  -3 4425.26 247.031   1
  -6   6   2 52336.4 834.342   4
   6  -6  -2 54741.9 1057.48   1
   6  -6  -1 101937. 1695.77   1
   6  -6  -1 101591. 1512.44   2
   6  -6   0 74898.6 1304.01   1
   6  -6   0 73455.6 1149.26   2
   6  -6   1 12078.7 383.066   1
   6  -6   2 270.324 60.7564   1
   6  -6   3 6268.14 251.172   1
   6  -6   4 5654.62 233.483   1
   6  -6   5 2442.52 149.850   1
  -6   6  -5 2428.22 170.813   3
  -6   6  -6 14571.1 450.725   3
   6  -6   6 14681.1 397.702   1
  -6   6  -7 3941.54 229.987   3
  -6   6  -8 1731.00 155.850   3
  -6   6  -9 2667.97 197.162   3
  -6   6 -10 11916.0 443.538   3
  -6   6 -11 15339.6 525.024   3
  -6   6 -12 493.833 105.609   3
  -6   6 -13 645.443 119.444   3
  -6   6 -14 155.588 83.5442   3
  -6   6 -15-148.463 92.8173   3
  -6   6 -16 339.544 117.375   3
  -6   6 -17 2049.39 242.616   3
  -6   6 -18 1492.99 210.001   3
   6  -5 -17 322.265 109.876   1
   6  -5 -16 5888.21 395.903   1
   6  -5 -15 27659.1 885.104   1
   6  -5 -14 41153.6 1093.81   1
   6  -5 -13 17802.1 656.378   1
   6  -5 -12 727.526 137.513   1
   6  -5 -11-117.660 86.5083   1
   6  -5 -10 2428.62 217.867   1
   6  -5  -9 8295.85 390.161   1
   6  -5  -8 29534.7 780.146   1
   6  -5  -7 38500.4 899.557   1
   6  -5  -6 6289.38 308.354   1
   6  -5  -5 1182.27 134.996   1
  -6   5   5 1175.97 47.1589   4
   6  -5  -4 6800.94 300.601   1
  -6   5   4 6168.71 149.657   4
   6  -5  -3 11360.4 391.103   1
  -6   5   3 10915.6 243.968   4
  -6   5   2 3002.26 125.275   4
   6  -5  -2 2960.64 186.501   1
  -6   5   1 1237.88 91.0351   4
   6  -5  -1 1228.45 119.010   1
   6  -5  -1 1187.99 71.3201   2
   6  -5   0 1698.25 134.129   1
   6  -5   1 3271.49 176.572   1
   6  -5   2 556.997 71.3688   1
  -6   5  -2 552.009 73.3910   1
  -6   5  -3 24560.8 542.390   1
  -6   5  -3 24403.9 490.664   2
   6  -5   3 25472.0 539.695   1
  -6   5  -4 34169.3 738.736   3
  -6   5  -4 33939.6 674.034   1
  -6   5  -4 33572.8 641.323   2
   6  -5   4 35067.5 661.031   1
   6  -5   5 10811.4 300.811   1
  -6   5  -5 9926.35 357.090   3
  -6   5  -5 10568.2 313.186   1
  -6   5  -6 638.519 76.7356   1
   6  -5   6 596.429 71.4096   1
  -6   5  -6 723.969 101.743   3
  -6   5  -7 422.330 62.7980   1
  -6   5  -7 529.757 89.3157   3
  -6   5  -8 381.073 62.3607   1
  -6   5  -8 434.943 84.1204   3
  -6   5  -9 167.277 47.4530   1
  -6   5  -9 266.308 82.9806   3
  -6   5 -10 3088.04 218.895   3
  -6   5 -11 2655.13 212.040   3
  -6   5 -12 48.9041 65.2935   3
  -6   5 -13 2913.59 242.001   3
  -6   5 -14 276.455 102.528   3
  -6   5 -15 2139.19 219.358   3
  -6   5 -16 5202.31 365.808   3
  -6   5 -17 983.117 178.825   3
  -6   5 -18 311.586 125.490   3
   6  -4 -17 74.6857 82.9740   1
   6  -4 -16 259.176 107.027   1
   6  -4 -15 5217.63 362.937   1
   6  -4 -14 6322.46 386.609   1
   6  -4 -13 1513.73 189.968   1
   6  -4 -12-31.5423 64.4116   1
   6  -4 -11 1129.18 150.473   1
   6  -4 -10 9662.46 428.296   1
   6  -4 -10 9928.86 252.716   4
   6  -4  -9 19640.1 613.059   1
   6  -4  -9 18750.6 375.292   4
   6  -4  -8 467.111 46.7710   4
   6  -4  -8 574.352 107.948   1
   6  -4  -7 113.012 29.0464   4
   6  -4  -7 209.828 76.5402   1
   6  -4  -6 89.2747 25.9961   4
   6  -4  -6 23.6380 58.5136   1
  -6   4   6 51.7936 20.0426   4
   6  -4  -5 138.414 61.9144   1
  -6   4   5 135.053 26.8347   4
   6  -4  -4 1968.18 157.890   1
  -6   4   4 1679.18 85.5289   4
   6  -4  -3 25084.8 611.082   1
  -6   4   3 25463.0 472.652   4
   6  -4  -2 28173.7 635.785   1
  -6   4   2 27909.8 530.603   4
   6  -4  -2 27912.8 441.094   2
  -6   4   1 350.973 50.2514   4
   6  -4  -1 474.846 77.2646   1
   6  -4   0 48.9222 42.3004   1
  -6   4   0 92.8078 48.4977   1
  -6   4   0 14.0334 28.3289   4
  -6   4  -1 2554.79 145.398   1
  -6   4  -1 2557.85 148.415   4
   6  -4   1 2514.91 143.788   1
  -6   4  -2 6026.99 218.018   1
   6  -4   2 6094.60 218.883   1
  -6   4  -2 5742.54 166.985   2
  -6   4  -3 113.647 29.9060   2
  -6   4  -3 178.478 40.8500   1
  -6   4  -3 217.503 61.7462   3
   6  -4   3 155.924 39.5189   1
  -6   4  -4 240.464 41.6167   2
   6  -4   4 396.179 49.8399   1
  -6   4  -4 348.730 73.4013   3
  -6   4  -4 307.935 51.2541   1
   6  -4   5 165.539 35.4688   1
  -6   4  -5 251.680 67.7962   3
  -6   4  -5 117.366 33.8113   1
  -6   4  -6 11845.6 398.595   3
  -6   4  -6 10923.4 280.661   1
  -6   4  -7 5673.22 277.128   3
  -6   4  -7 5464.02 180.434   1
  -6   4  -8 5830.57 289.017   3
  -6   4  -8 5666.80 182.157   1
  -6   4  -9 13100.4 459.816   3
  -6   4  -9 12506.6 294.968   1
  -6   4 -10 2997.45 222.565   3
  -6   4 -11 3090.03 229.361   3
  -6   4 -12 4646.81 300.528   3
  -6   4 -13 6326.54 359.828   3
  -6   4 -14 669.401 143.229   3
  -6   4 -15 4979.63 347.732   3
  -6   4 -16 4774.39 356.086   3
  -6   4 -17 110.116 82.9796   3
  -6   4 -18 64.8504 93.5972   3
   6  -3 -17 3068.76 290.512   1
   6  -3 -16 5820.92 390.426   1
   6  -3 -15 2107.23 231.420   1
   6  -3 -14 114.042 86.9469   1
   6  -3 -13 44.9500 80.7809   1
   6  -3 -12 4366.58 296.640   1
   6  -3 -12 4334.98 196.750   4
   6  -3 -11 542.852 117.817   1
   6  -3 -11 513.155 65.8207   4
   6  -3 -10 7461.18 370.018   1
   6  -3 -10 7886.47 255.651   4
   6  -3  -9 9094.57 394.228   1
   6  -3  -9 9176.75 272.539   4
   6  -3  -8 435.584 98.8767   1
   6  -3  -8 351.371 52.4327   4
  -6   3   8 338.546 49.8689   4
   6  -3  -7 1942.48 169.701   1
   6  -3  -7 1790.40 108.136   4
  -6   3   7 1713.34 100.859   4
   6  -3  -6 18.0868 50.1715   1
   6  -3  -6 31.0116 28.7639   4
  -6   3   6 25.1843 25.0077   4
   6  -3  -5 9103.37 348.177   1
   6  -3  -5 9205.51 259.120   4
  -6   3   5 8898.25 239.456   4
   6  -3  -4 3849.21 215.352   1
   6  -3  -4 3792.64 159.596   4
  -6   3   4 3750.61 149.050   4
   6  -3  -3 213.736 44.2320   4
   6  -3  -3 248.793 59.0361   1
  -6   3   3 210.375 39.0847   4
   6  -3  -2 1397.87 120.709   1
  -6   3   2 1351.47 96.9071   4
  -6   3   1 37235.3 701.755   4
   6  -3  -1 37471.6 740.188   1
   6  -3   0 19836.0 463.901   1
  -6   3   0 20441.3 476.400   4
   6  -3   1 895.651 83.6847   1
  -6   3  -1 664.933 79.5001   4
  -6   3  -2 23317.3 543.877   3
   6  -3   2 22419.7 458.259   1
  -6   3  -2 22147.9 387.893   2
  -6   3  -3 20581.8 419.320   1
  -6   3  -3 22809.8 544.201   3
   6  -3   3 21958.6 427.352   1
  -6   3  -4 2207.35 99.9561   1
  -6   3  -4 2290.74 163.875   3
   6  -3   4 2220.84 98.6788   1
  -6   3  -5 3749.85 122.170   1
   6  -3   5 3690.52 119.875   1
  -6   3  -5 3927.49 216.636   3
  -6   3  -6 13606.3 260.156   1
  -6   3  -6 14201.0 446.592   3
  -6   3  -7 1594.89 61.0663   1
  -6   3  -7 1306.36 144.047   3
  -6   3  -8 2580.19 196.108   3
  -6   3  -9 5012.62 278.774   3
  -6   3 -10 225.089 78.0372   3
  -6   3 -11 1569.81 173.323   3
  -6   3 -12 1245.89 161.422   3
  -6   3 -13 1174.36 164.472   3
  -6   3 -14 18.5062 81.2137   3
  -6   3 -15 760.677 153.936   3
  -6   3 -16 74.7394 92.8811   3
  -6   3 -17 2703.26 285.968   3
   6  -2 -17 127.654 81.2508   1
   6  -2 -16 1523.81 202.993   1
   6  -2 -15-27.6434 80.3889   1
   6  -2 -14 2682.93 251.354   1
   6  -2 -13 1268.11 123.163   4
   6  -2 -13 1517.50 185.105   1
   6  -2 -12 3405.05 264.987   1
   6  -2 -12 3242.91 188.649   4
   6  -2 -11 3915.85 268.706   1
   6  -2 -11 3838.31 197.527   4
   6  -2 -10 1662.78 175.386   1
   6  -2 -10 1517.56 119.455   4
   6  -2  -9 3660.02 246.963   1
   6  -2  -9 3810.64 184.611   4
   6  -2  -8 8341.26 360.973   1
   6  -2  -8 8168.43 273.553   4
  -6   2   8 7994.24 263.540   4
   6  -2  -7 10476.4 399.182   1
   6  -2  -7 10835.7 316.151   4
  -6   2   7 10921.3 305.594   4
   6  -2  -6 376.817 86.7320   1
   6  -2  -6 469.735 65.4870   4
  -6   2   6 407.909 55.9742   4
   6  -2  -5 15259.3 461.329   1
   6  -2  -5 15441.5 388.614   4
  -6   2   5 14868.0 363.168   4
   6  -2  -4 10646.6 365.568   1
   6  -2  -4 10988.3 320.154   4
  -6   2   4 10987.5 302.810   4
   6  -2  -3-18.6022 31.3834   4
  -6   2   3 6.97109 28.1664   4
   6  -2  -2 1330.63 114.754   1
   6  -2  -2 1377.15 110.872   4
  -6   2   2 1568.18 110.509   4
   6  -2  -1 2101.95 134.298   1
  -6   2   1 1976.22 130.579   4
   6  -2  -1 2047.97 139.678   4
   6  -2   0 900.338 86.8136   1
  -6   2  -1 589.284 80.3895   3
   6  -2   1 532.018 62.9272   1
  -6   2  -2 7132.58 273.005   3
   6  -2   2 7242.18 211.321   1
   6  -2   3 358.810 39.7658   1
  -6   2  -3 252.701 61.6758   3
  -6   2  -4 19770.5 520.338   3
   6  -2   4 19558.2 337.906   1
  -6   2  -5 11784.7 393.038   3
  -6   2  -6 2767.49 192.418   3
  -6   2  -7-34.9928 62.3578   3
  -6   2  -8 628.056 108.461   3
  -6   2  -9 78.5381 64.2574   3
  -6   2 -10 7846.96 377.024   3
  -6   2 -11 23735.4 715.316   3
  -6   2 -12 8359.50 418.867   3
  -6   2 -13-49.4555 92.4391   3
  -6   2 -14 1634.74 206.997   3
  -6   2 -15 1956.54 235.016   3
  -6   2 -16 508.908 151.605   3
  -6   2 -17 2110.61 264.052   3
   6  -1 -17 838.794 169.529   1
   6  -1 -16 67.5198 76.8473   1
   6  -1 -15 1388.96 186.510   1
   6  -1 -14 5126.25 344.327   1
   6  -1 -14 4778.63 262.896   4
   6  -1 -13 353.734 109.516   1
   6  -1 -13 372.685 83.3292   4
   6  -1 -12 3297.90 259.215   1
   6  -1 -12 3320.37 203.651   4
   6  -1 -11 4323.37 288.355   1
   6  -1 -11 4316.14 227.295   4
   6  -1 -10 269.156 57.3646   4
   6  -1  -9 4077.72 206.941   4
   6  -1  -8 1358.49 118.408   4
   6  -1  -7 1045.87 101.848   4
   6  -1  -6-17.4965 19.5123   2
   6  -1  -6 2.92772 39.3265   4
   6  -1  -5 3346.63 179.689   4
   6  -1  -5 3144.40 114.314   2
   6  -1  -4 772.740 90.1332   4
   6  -1  -3 9568.22 317.950   4
   6  -1  -2 43152.3 839.426   4
   6  -1  -1 19850.4 462.241   1
   6  -1  -1 19448.1 497.595   4
  -6   1   1 19243.7 463.621   3
   6  -1   0 129.611 41.4349   1
   6  -1   0 183.096 59.7589   4
  -6   1   0 167.944 54.5705   3
  -6   1   0 166.690 16.9637   2
   6  -1   1 1429.81 97.0573   1
  -6   1  -1 1565.89 121.562   3
   6  -1   2 85.0869 29.8501   1
  -6   1  -2 113.993 53.9568   3
  -6   1  -3 13078.9 401.323   3
   6  -1   3 13463.3 275.881   1
  -6   1  -4 34419.4 745.809   3
   6  -1   4 33611.3 495.961   1
  -6   1  -5 26084.2 646.695   3
  -6   1  -6 262.603 68.1002   3
  -6   1  -7 15550.6 501.345   3
  -6   1  -8 8259.59 364.503   3
  -6   1  -9 465.051 100.929   3
  -6   1 -10 3453.59 251.657   3
  -6   1 -11 3459.67 266.943   3
  -6   1 -12 1181.39 168.784   3
  -6   1 -13 15176.7 620.528   3
  -6   1 -14 18078.0 705.502   3
  -6   1 -15 5111.13 379.922   3
  -6   1 -16 156.607 95.3470   3
   6   0 -17 61.0918 100.895   1
   6   0 -16 4961.53 364.046   1
   6   0 -15 1307.12 187.658   1
   6   0 -15 1026.57 135.982   4
   6   0 -14 372.326 88.7790   4
   6   0 -13 197.406 71.8382   4
   6   0 -12 546.586 94.6872   4
   6   0 -11 1817.06 155.992   4
   6   0 -10 5567.99 271.544   4
   6   0  -9 34674.1 769.895   4
   6   0  -8 12656.3 406.548   4
   6   0  -7 22.5384 26.1300   2
   6   0  -7 53.8295 46.0952   4
   6   0  -6 431.921 52.4177   2
   6   0  -6 597.130 88.7200   4
   6   0  -5 1522.65 132.055   4
   6   0  -5 1375.55 81.7368   2
   6   0  -4 1905.09 146.371   4
   6   0  -3 13940.6 416.405   4
  -6   0   2 20015.1 461.657   3
   6   0  -2 21054.4 536.197   4
  -6   0   1 4817.00 203.503   3
   6   0  -1 4853.81 237.584   4
  -6   0   1 4714.65 127.406   2
  -6   0   0 36170.3 722.431   3
   6   0   0 37187.9 791.711   4
  -6   0  -1 30505.4 650.078   3
   6   0   1 30653.9 713.427   4
  -6   0  -2 3082.99 177.173   3
   6   0   3 169.739 30.1240   1
  -6   0  -3 157.469 54.3454   3
   6   0   4 105.758 16.5933   1
  -6   0  -4 114.980 59.8535   3
   6   0   4 135.671 20.1691   1
  -6   0  -5 3985.38 229.195   3
  -6   0  -6 30139.1 736.245   3
  -6   0  -7 55671.4 1146.24   3
  -6   0  -8 18727.8 591.821   3
  -6   0  -9 1721.54 180.012   3
  -6   0 -10 466.288 111.326   3
  -6   0 -11 225.551 92.0622   3
  -6   0 -12 1937.19 216.566   3
  -6   0 -13 15854.9 647.608   3
  -6   0 -14 19263.9 750.924   3
  -6   0 -15 3147.75 308.152   3
  -6   0 -16 485.597 143.960   3
   6   1 -16 4748.97 310.379   4
   6   1 -15 3336.90 253.988   4
   6   1 -14 127.823 72.1249   4
   6   1 -13 2589.27 212.368   4
   6   1 -12 92.1453 60.1861   4
   6   1 -11 289.526 73.1114   4
   6   1 -10 1780.78 160.772   4
   6   1  -9 1273.87 133.660   4
   6   1  -8 3678.07 219.125   4
  -6  -1   8 3367.43 163.986   3
   6   1  -7 26747.0 654.118   4
   6   1  -7 25268.9 540.466   2
   6   1  -6 28978.3 691.898   4
   6   1  -6 28735.6 565.094   2
   6   1  -5 6144.79 278.234   4
   6   1  -4 550.617 90.2977   4
  -6  -1   4 158.298 41.8227   3
  -6  -1   3 24.1265 24.9300   3
   6   1  -3-0.41502 48.2798   4
  -6  -1   2 5025.90 202.558   3
   6   1  -2 5044.03 252.241   4
  -6  -1   2 4922.97 162.216   2
  -6  -1   1 45373.4 830.649   3
   6   1  -1 45797.5 938.208   4
  -6  -1   1 44846.1 734.369   2
  -6  -1   0 70378.0 1197.39   3
   6   1   0 72521.5 1305.46   4
  -6  -1  -1 54910.6 998.881   3
   6   1   1 54548.5 1088.65   4
  -6  -1  -2 13870.8 413.673   3
   6   1   2 14529.1 473.826   4
   6   1   3 4.52992 18.7629   1
  -6  -1  -3 16.0012 42.5176   3
   6   1   4 9.96038 14.0859   1
  -6  -1  -4 127.502 59.9281   3
  -6  -1  -5 145.456 64.9470   3
  -6  -1  -6 18887.7 568.073   3
  -6  -1  -7 22887.7 657.474   3
  -6  -1  -8 10448.7 440.735   3
  -6  -1  -9 5420.29 326.519   3
  -6  -1 -10 1655.09 193.883   3
  -6  -1 -11 7696.16 420.257   3
  -6  -1 -12 9255.23 481.125   3
  -6  -1 -13 191.784 97.4722   3
  -6  -1 -14 811.875 169.571   3
  -6  -1 -15 501.593 133.973   3
   6   2 -17 15.8188 71.9156   4
   6   2 -16 18.4082 76.6090   4
   6   2 -15 1877.29 203.218   4
   6   2 -14 13348.0 528.858   4
   6   2 -13 24122.9 719.435   4
   6   2 -12 5964.88 328.262   4
   6   2 -11 199.014 77.0130   4
   6   2 -10 425.465 90.7669   4
   6   2  -9 4680.85 267.654   4
   6   2  -8 14611.2 487.225   4
  -6  -2   7 39162.3 675.272   3
   6   2  -7 38394.5 876.741   4
  -6  -2   6 64848.5 1021.14   3
   6   2  -6 63675.1 1231.98   4
  -6  -2   5 9200.60 257.404   3
   6   2  -5 8709.77 355.900   4
  -6  -2   4 328.858 52.7582   3
   6   2  -4 220.253 66.2031   4
  -6  -2   3 530.594 63.8639   3
   6   2  -3 592.664 102.103   4
  -6  -2   2 578.430 61.9834   2
  -6  -2   2 591.267 71.2212   3
   6   2  -2 633.417 96.4470   4
  -6  -2   1 722.320 81.7858   3
   6   2  -1 727.492 109.770   4
  -6  -2   1 917.898 80.6529   2
  -6  -2   0 14168.3 398.203   3
   6   2   0 14765.0 481.644   4
  -6  -2  -1 13313.0 399.013   3
   6   2   1 14792.9 481.374   4
  -6  -2  -2 1828.95 145.602   3
   6   2   2 1852.48 114.535   1
   6   2   2 1844.65 172.614   4
   6   2   3 1811.04 105.363   1
  -6  -2  -3 1616.76 142.911   3
   6   2   3 1900.62 172.698   4
  -6  -2  -4 26349.5 666.942   3
   6   2   4 25744.0 478.425   1
  -6  -2  -5 31971.7 779.900   3
   6   2   5 31960.3 532.808   1
  -6  -2  -6 8826.10 386.909   3
  -6  -2  -7 243.533 85.3149   3
  -6  -2  -8 4625.01 299.579   3
  -6  -2  -9 2.99215 82.1118   3
  -6  -2 -10 1907.93 211.592   3
  -6  -2 -11 12256.7 558.723   3
  -6  -2 -12 7023.65 435.695   3
  -6  -2 -13 1096.64 196.084   3
  -6  -2 -14 426.344 145.940   3
  -6  -2 -15-78.2888 100.228   3
   6   3 -17 356.094 116.338   4
   6   3 -16 182.790 90.5405   4
   6   3 -15 2054.77 224.775   4
   6   3 -14 10374.0 482.721   4
   6   3 -13 16188.2 600.787   4
   6   3 -12 5773.83 341.903   4
   6   3 -11 170.427 70.6691   4
   6   3 -10-17.2312 60.5897   4
   6   3  -9 5647.36 314.233   4
   6   3  -8 5419.44 300.623   4
  -6  -3   7 2200.16 100.587   3
   6   3  -7 2127.05 188.729   4
  -6  -3   6 2747.56 120.991   3
   6   3  -6 3089.87 220.573   4
   6   3  -5 2285.88 186.060   4
  -6  -3   5 2026.26 108.394   3
   6   3  -4 4006.51 250.179   4
  -6  -3   4 4059.31 164.893   3
  -6  -3   3 8774.90 269.026   3
   6   3  -3 9175.53 381.155   4
  -6  -3   3 9253.63 292.731   2
  -6  -3   2 42258.1 782.816   3
   6   3  -2 42309.3 948.555   4
  -6  -3   2 41726.5 781.503   2
  -6  -3   1 22003.2 515.697   3
   6   3  -1 21754.7 625.285   4
  -6  -3   1 21756.5 495.730   2
  -6  -3   0 238.720 62.2394   3
   6   3   0 338.304 87.6009   4
  -6  -3  -1 15.2331 41.9916   3
   6   3   1 30.3443 55.8581   4
   6   3   2 447.999 66.8604   1
  -6  -3  -2 369.739 74.6922   3
   6   3   2 459.583 100.748   4
  -6  -3  -3 32.4226 56.2627   3
   6   3   3 89.0163 36.6642   1
   6   3   3 192.452 81.9052   4
  -6  -3  -4 5063.13 278.002   3
   6   3   4 5413.44 306.535   4
   6   3   4 5270.84 194.584   1
  -6  -3  -5 11033.0 437.505   3
  -6  -3  -6 3569.31 252.881   3
  -6  -3  -7 101.088 81.3589   3
  -6  -3  -8 12.1640 83.2228   3
  -6  -3  -9 4754.62 328.138   3
  -6  -3 -10 5773.58 378.052   3
  -6  -3 -11 961.428 178.222   3
  -6  -3 -12 830.015 155.525   3
  -6  -3 -13 1504.58 212.083   3
  -6  -3 -14 1447.40 227.152   3
   6   4 -17 138.270 108.292   4
   6   4 -16 3086.40 286.933   4
   6   4 -15 2116.20 231.484   4
   6   4 -14 40.3959 75.1896   4
   6   4 -13 258.584 103.080   4
   6   4 -12 13.7225 68.4735   4
   6   4 -11 220.765 92.6294   4
   6   4 -10 1531.17 176.814   4
   6   4  -9 19576.7 643.343   4
   6   4  -8 14889.8 544.537   4
   6   4  -7 5080.07 300.585   4
   6   4  -6 105.451 67.4419   4
  -6  -4   5 1494.76 90.0779   3
   6   4  -5 1629.36 173.002   4
  -6  -4   4 4167.47 168.891   3
   6   4  -4 4025.63 262.359   4
  -6  -4   4 4204.43 211.410   2
  -6  -4   3 75.7458 38.4905   2
  -6  -4   3 142.364 38.6370   3
   6   4  -3 69.2272 62.9843   4
  -6  -4   2 1884.87 131.592   3
   6   4  -2 1949.75 183.987   4
  -6  -4   2 1715.86 131.559   2
  -6  -4   1 2060.54 145.499   3
   6   4  -1 1998.09 187.538   4
  -6  -4   1 1867.12 138.961   2
  -6  -4   0 368.319 69.5140   3
   6   4   0 504.502 105.116   4
  -6  -4  -1 104.518 48.9873   3
   6   4   1 311.553 94.3817   4
  -6  -4  -2 5272.01 271.303   3
   6   4   2 4933.38 297.103   4
  -6  -4  -3 16418.1 524.183   3
   6   4   3 16321.3 571.712   4
  -6  -4  -4 15641.6 535.787   3
   6   4   4 16636.4 582.195   4
  -6  -4  -5 2879.10 229.885   3
  -6  -4  -6 5036.32 315.086   3
  -6  -4  -7 4335.97 304.647   3
  -6  -4  -8 368.770 113.052   3
  -6  -4  -9 7093.53 416.707   3
  -6  -4 -10 15043.9 632.102   3
  -6  -4 -11 6481.21 418.095   3
  -6  -4 -12 267.110 124.471   3
  -6  -4 -13-48.6142 91.8640   3
   6   5 -15 5654.49 387.107   4
   6   5 -14 698.882 152.562   4
   6   5 -13 95.9495 75.9032   4
   6   5 -12 516.610 129.558   4
   6   5 -11 3599.80 287.629   4
   6   5 -10 2996.05 257.706   4
   6   5  -9 375.566 104.936   4
   6   5  -8-24.0327 68.8366   4
   6   5  -7 393.258 100.122   4
   6   5  -6 3144.96 247.363   4
   6   5  -5 1308.37 161.811   4
   6   5  -4 18675.4 620.524   4
  -6  -5   4 19193.9 529.167   2
  -6  -5   3 17226.0 430.825   3
   6   5  -3 16104.7 570.564   4
  -6  -5   3 17082.6 488.289   2
  -6  -5   2 5815.83 246.263   3
   6   5  -2 5181.42 312.119   4
  -6  -5   2 5251.01 253.780   2
  -6  -5   1 2088.37 155.333   3
   6   5  -1 2191.97 204.601   4
  -6  -5   1 2131.54 159.006   2
  -6  -5   0 2645.97 185.590   3
   6   5   0 2578.62 220.748   4
  -6  -5   0 2372.76 169.400   2
  -6  -5  -1 745.326 110.240   3
   6   5   1 815.358 133.225   4
  -6  -5  -2 4028.67 251.699   3
   6   5   2 3820.97 271.173   4
  -6  -5  -3 20956.1 639.178   3
   6   5   3 21331.9 684.585   4
  -6  -5  -4 7480.62 377.091   3
   6   5   4 7169.76 388.194   4
  -6  -5  -5 726.789 130.562   3
   6   5   5 690.458 134.847   4
  -6  -5  -6 1411.22 182.099   3
  -6  -5  -7-2.72173 76.7757   3
  -6  -5  -8 50.3292 84.6608   3
  -6  -5  -9 804.403 154.944   3
  -6  -5 -10 1733.21 220.417   3
  -6  -5 -11 1050.32 175.413   3
  -6  -5 -12 6838.19 447.850   3
   6   6 -13 1505.08 207.001   4
   6   6 -12 269.187 92.1867   4
   6   6 -11 6352.18 396.829   4
   6   6 -10 9865.25 492.443   4
   6   6  -9 2827.28 256.187   4
   6   6  -8-17.3606 90.4071   4
   6   6  -7 360.263 110.993   4
   6   6  -6 159.831 88.2777   4
   6   6  -5 1719.32 193.461   4
   6   6  -4 8699.24 428.496   4
  -6  -6   4 8720.46 360.950   2
   6   6  -3 2755.39 238.994   4
  -6  -6   3 2680.31 193.630   2
  -6  -6   2 775.147 112.657   2
   6   6  -2 808.631 144.516   4
   6   6  -1 6556.10 371.053   4
  -6  -6   1 6469.29 307.496   2
  -6  -6   1 7122.97 292.355   3
   6   6   0 3097.89 253.790   4
  -6  -6   0 2704.39 198.307   2
  -6  -6   0 2815.59 192.060   3
  -6  -6  -1 345.847 85.6596   3
   6   6   1 142.487 81.1658   4
   6   6   2 4513.33 308.677   4
  -6  -6  -2 4394.28 267.196   3
  -6  -6  -3 387.212 93.4875   3
   6   6   3 546.796 122.506   4
   6   6   4 3289.19 271.995   4
  -6  -6  -4 3266.15 248.146   3
   6   6   5 13387.2 564.610   4
  -6  -6  -5 13354.9 532.480   3
  -6  -6  -6 16988.0 626.368   3
  -6  -6  -7 2480.21 240.322   3
  -6  -6  -8-46.0598 89.6033   3
  -6  -6  -9-14.8723 78.5081   3
  -6  -6 -10 487.694 135.362   3
  -6  -6 -11 2844.07 287.874   3
   6   7 -11 3167.94 297.959   4
   6   7 -10 3528.98 306.732   4
   6   7  -9 2798.13 266.472   4
   6   7  -8 10518.5 516.011   4
   6   7  -7 5686.08 369.982   4
   6   7  -6 2748.83 251.519   4
   6   7  -5 272.974 107.244   4
  -6  -7   4 161.349 68.0630   2
   6   7  -4 152.300 89.3545   4
  -6  -7   3 394.322 91.0494   2
   6   7  -3 448.425 113.641   4
   6   7  -2 12926.6 550.907   4
  -6  -7   2 12274.5 462.923   2
   6   7  -1 17130.3 642.309   4
  -6  -7   1 16109.9 548.184   2
   6   7   0 3137.20 267.470   4
  -6  -7   0 3082.41 229.582   2
   6   7   1 70.2450 81.8929   4
  -6  -7  -2 574.539 110.555   3
   6   7   2 547.374 127.304   4
  -6  -7  -3 128.215 70.5556   3
   6   7   3 153.964 101.508   4
  -6  -7  -4 273.046 93.9998   3
   6   7   4 329.509 109.553   4
   6   7   5 1967.40 226.147   4
  -6  -7  -5 2509.39 230.612   3
  -6  -7  -6 907.887 159.526   3
  -6  -7  -7 1894.06 216.913   3
  -6  -7  -8 5290.31 369.061   3
  -6  -7  -9 1491.33 216.490   3
  -6  -7 -10-49.1539 92.7058   3
   6   8  -8 7323.97 450.108   4
   6   8  -7 2206.44 239.970   4
   6   8  -6 213.521 98.5443   4
   6   8  -5 1701.31 214.261   4
  -6  -8   4-12.3779 58.6113   2
   6   8  -4 49.1702 99.8914   4
  -6  -8   3 290.261 85.0667   2
   6   8  -3 102.749 75.4067   4
  -6  -8   2 500.575 104.621   2
   6   8  -2 350.985 102.339   4
   6   8  -1 1.35759 71.1203   4
  -6  -8   1 43.2594 61.9818   2
   6   8   0 2051.96 230.347   4
  -6  -8   0 1556.07 177.809   2
   6   8   1 9437.35 491.019   4
  -6  -8  -1 9159.42 432.967   2
   6   8   2 6851.40 416.301   4
   6   8   3-71.1558 80.1470   4
   6   8   4 1219.90 192.843   4
  -6  -8  -5 384.311 111.084   3
   6   8   5 435.833 127.072   4
  -6  -8  -6 868.499 155.130   3
  -6  -8  -7 5540.10 374.182   3
  -6  -8  -8 6716.99 425.402   3
  -6  -8  -9 2253.84 258.137   3
  -6  -9   4 155.472 90.9323   2
   6   9  -4 220.959 107.185   4
  -6  -9   3 302.666 87.0177   2
   6   9  -3 559.036 135.121   4
  -6  -9   2 737.985 134.095   2
   6   9  -2 1030.67 168.645   4
  -6  -9   1 972.445 151.552   2
   6   9  -1 774.260 142.736   4
   6   9   0 2652.95 273.786   4
  -6  -9   0 3142.67 263.078   2
   6   9   1 8729.71 491.146   4
  -6  -9  -1 7561.46 419.459   2
   6   9   2 3674.80 316.512   4
  -6  -9  -2 3086.65 265.773   2
   6   9   3-5.90433 72.1047   4
   6   9   4 450.071 137.056   4
  -6 -10   4 1890.51 213.499   2
  -6 -10   3 635.808 127.565   2
  -6 -10   2 2543.25 248.899   2
  -6 -10   1 6370.49 393.081   2
  -6 -10   0 2236.27 242.661   2
  -6 -10  -1 75.7329 68.4069   2
  -6 -10  -2 694.096 144.370   2
   7 -15  -2 19872.0 741.739   2
   7 -15  -1 13248.9 589.694   2
   7 -15   0 3182.71 277.838   2
   7 -15   1 387.922 113.041   2
   7 -15   2 31.7419 77.5111   2
   7 -14  -5 118.189 77.9566   2
   7 -14  -4 2086.62 223.738   2
   7 -14  -3 10782.6 512.129   2
   7 -14  -2 23239.2 855.011   1
   7 -14  -2 21814.5 749.789   2
   7 -14  -1 18828.8 757.520   1
   7 -14  -1 16952.3 641.655   2
   7 -14   0 2322.05 262.245   1
   7 -14   0 2147.23 222.307   2
   7 -14   1 262.673 85.2884   2
   7 -14   1 586.012 144.627   1
   7 -14   2-51.1464 85.2347   2
   7 -14   2 26.6753 78.9594   1
   7 -14   3 1235.49 200.598   1
   7 -14   4 5230.31 383.892   1
   7 -14   5 3690.57 322.439   1
  -7  14  -7 2093.92 211.729   4
  -7  14  -8 4811.48 333.398   4
  -7  14  -9 121.147 82.6878   4
   7 -13  -6 1320.09 207.042   1
   7 -13  -5 1210.44 191.350   1
   7 -13  -4 568.878 130.795   1
   7 -13  -4 820.546 145.928   2
   7 -13  -3 1732.23 224.968   1
   7 -13  -3 1460.48 177.147   2
   7 -13  -2 3309.80 261.080   2
   7 -13  -2 3575.89 306.959   1
   7 -13  -1-18.7038 69.6783   2
   7 -13  -1 116.790 96.7886   1
   7 -13   0 8880.25 481.834   1
   7 -13   0 8297.74 407.234   2
   7 -13   1 7644.59 444.791   1
   7 -13   1 7740.15 395.530   2
   7 -13   2 2795.28 265.942   1
   7 -13   2 2761.52 237.270   2
   7 -13   3-44.9197 94.2359   1
   7 -13   4 232.376 100.851   1
  -7  13  -4 100.306 43.6244   4
   7 -13   5 303.248 109.755   1
  -7  13  -5-3.40832 60.3675   4
  -7  13  -6 1830.65 186.204   3
  -7  13  -6 1935.15 191.712   4
  -7  13  -7 9332.53 448.254   4
  -7  13  -8 4012.62 299.512   4
  -7  13  -9 141.296 92.4014   4
  -7  13 -10 411.074 112.983   4
   7 -12  -9 897.740 178.878   1
   7 -12  -8 190.879 98.1485   1
   7 -12  -7 4127.30 336.959   1
   7 -12  -6 13506.6 612.024   1
   7 -12  -5 5664.31 386.444   1
   7 -12  -4 35.3432 73.1707   1
   7 -12  -3 322.703 111.634   1
   7 -12  -3 367.760 88.5314   2
   7 -12  -2-36.0182 88.8089   1
   7 -12  -2 33.5970 57.7866   2
   7 -12  -1 346.956 102.535   1
   7 -12  -1 347.115 90.4196   2
   7 -12   0 2660.27 215.560   2
   7 -12   0 2895.47 262.015   1
   7 -12   1 3044.26 266.853   1
   7 -12   1 3143.96 235.186   2
   7 -12   2 340.280 84.6482   2
   7 -12   2 309.703 112.553   1
  -7  12  -2 547.610 91.0264   4
   7 -12   3 632.589 130.173   1
  -7  12  -3 575.227 94.4644   4
   7 -12   4-116.660 81.1850   1
  -7  12  -4-98.4709 75.8376   4
   7 -12   5 4639.76 322.046   1
  -7  12  -5 5040.81 288.612   4
  -7  12  -6 3018.72 230.546   3
   7 -12   6 3217.26 267.095   1
  -7  12  -6 3003.45 237.799   4
  -7  12  -7 193.856 84.3476   3
  -7  12  -7 103.796 56.5459   4
  -7  12  -8 14.3652 46.0212   3
  -7  12  -8-27.7694 56.1126   4
  -7  12  -9 198.081 93.9706   4
  -7  12 -10 203.885 89.8361   4
  -7  12 -11 693.130 137.113   4
   7 -11 -11-8.03701 98.3608   1
   7 -11 -10-0.18972 73.1179   1
   7 -11  -9 185.313 95.4713   1
   7 -11  -8 581.667 140.776   1
   7 -11  -7 41.2020 72.1001   1
   7 -11  -6 1039.44 172.569   1
   7 -11  -5 96.4288 79.1295   1
   7 -11  -4 3176.93 273.404   1
   7 -11  -3-19.2585 82.0268   1
   7 -11  -3 78.9521 58.5236   2
   7 -11  -2 5195.66 282.751   2
   7 -11  -2 5075.34 334.247   1
   7 -11  -1 11131.6 423.240   2
   7 -11  -1 11628.4 504.984   1
   7 -11   0 4863.86 269.518   2
   7 -11   0 4583.08 312.130   1
   7 -11   1-9.94545 63.0152   2
   7 -11   1-36.3199 71.6232   1
  -7  11  -1 25.1922 38.0226   4
   7 -11   2 591.623 122.596   1
   7 -11   2 787.068 115.929   2
  -7  11  -2 951.203 112.636   4
   7 -11   3 1985.28 199.332   1
  -7  11  -3 2099.56 166.979   4
   7 -11   4 785.802 137.054   1
  -7  11  -4 822.100 112.842   4
   7 -11   5 7705.25 391.171   1
  -7  11  -5 6740.22 331.051   4
  -7  11  -6 4605.66 276.392   3
   7 -11   6 5170.94 319.847   1
  -7  11  -6 4968.92 291.005   4
  -7  11  -7 249.718 73.4527   3
  -7  11  -7 344.769 83.6856   4
  -7  11  -8 1290.74 150.467   3
  -7  11  -8 1444.92 170.270   4
  -7  11  -9 66.3754 49.4821   3
  -7  11  -9 67.7381 71.6850   4
  -7  11 -10 585.717 112.720   3
  -7  11 -10 528.876 122.941   4
  -7  11 -11 524.815 108.486   3
  -7  11 -11 554.877 126.876   4
  -7  11 -12 1402.58 199.226   4
   7 -10 -12 508.361 133.325   1
   7 -10 -11 2144.60 248.129   1
   7 -10 -10 864.106 165.055   1
   7 -10  -9 1606.82 209.393   1
   7 -10  -8 11270.0 530.734   1
   7 -10  -7 5186.19 348.499   1
   7 -10  -6 42.2088 75.8939   1
   7 -10  -5 807.183 144.239   1
   7 -10  -4 1221.26 164.571   1
   7 -10  -3-48.9562 75.6477   1
   7 -10  -2 5225.79 322.213   1
   7 -10  -2 5129.82 263.112   2
  -7  10   1 12086.5 323.726   4
   7 -10  -1 12024.9 491.729   1
   7 -10  -1 11853.5 408.377   2
   7 -10   0 11.6189 49.2981   2
   7 -10   0 200.545 84.1932   1
  -7  10   0 88.4639 45.6785   4
  -7  10  -1 5677.92 241.323   4
   7 -10   1 5248.61 261.902   2
   7 -10   1 5345.66 314.871   1
  -7  10  -2 1357.25 126.791   4
   7 -10   2 1412.71 159.967   1
   7 -10   2 1518.04 138.672   2
   7 -10   3 67.0985 69.5666   1
  -7  10  -3 94.2727 55.9413   4
   7 -10   4 149.021 66.3885   1
  -7  10  -4 311.725 83.9392   4
  -7  10  -5 826.848 117.938   4
   7 -10   5 1134.23 149.491   1
  -7  10  -6 366.188 78.0193   3
   7 -10   6 276.682 85.2580   1
  -7  10  -6 365.207 82.0762   4
  -7  10  -7 5091.44 284.418   3
  -7  10  -7 4249.06 267.822   4
  -7  10  -8 14830.3 513.535   3
  -7  10  -8 14625.3 537.751   4
  -7  10  -9 2284.01 196.312   3
  -7  10  -9 2226.94 208.523   4
  -7  10 -10 163.576 68.0002   3
  -7  10 -10-22.1052 66.2628   4
  -7  10 -11 142.564 61.5907   3
  -7  10 -11 111.535 77.0336   4
  -7  10 -12 1415.41 163.289   3
  -7  10 -12 1395.13 195.471   4
  -7  10 -13 1176.23 182.836   4
   7  -9 -13 816.922 160.881   1
   7  -9 -12-137.078 112.009   1
   7  -9 -11 223.015 98.7184   1
   7  -9 -10 98.3178 80.0275   1
   7  -9  -9 2183.03 233.160   1
   7  -9  -8 3241.42 271.725   1
   7  -9  -7 26.1285 80.6174   1
   7  -9  -6 3553.12 273.589   1
   7  -9  -5 6686.81 369.718   1
   7  -9  -4 1763.25 186.281   1
   7  -9  -3 60.1912 56.5355   1
  -7   9   2 1360.89 86.7175   4
   7  -9  -2 1159.81 114.250   2
   7  -9  -2 1160.22 148.299   1
  -7   9   1 472.372 59.0775   4
   7  -9  -1 464.522 102.890   1
   7  -9  -1 387.245 67.4653   2
  -7   9   0 5151.90 209.373   4
   7  -9   0 4712.47 281.945   1
   7  -9   0 5071.64 234.930   2
  -7   9  -1 12691.7 369.548   4
   7  -9   1 12494.9 466.248   1
   7  -9   1 12740.4 396.236   2
  -7   9  -2 8722.43 315.331   4
   7  -9   2 8519.43 374.865   1
   7  -9   3 2086.61 180.925   1
   7  -9   4 1034.35 127.836   1
   7  -9   5 12509.7 449.982   1
   7  -9   6 13294.2 459.462   1
  -7   9  -6 12655.6 450.285   3
   7  -9   7 1161.95 130.991   1
  -7   9  -7 1053.01 130.718   3
  -7   9  -8 216.923 69.9089   3
  -7   9  -9 597.146 100.775   3
  -7   9 -10 1069.61 141.580   3
  -7   9 -11 5356.38 313.320   3
  -7   9 -12 25151.4 749.124   3
  -7   9 -13 30371.7 857.086   3
  -7   9 -14 7369.92 400.149   3
   7  -8 -14-84.4741 88.9534   1
   7  -8 -13 3237.09 294.750   1
   7  -8 -12 7291.60 435.544   1
   7  -8 -11 2812.96 262.625   1
   7  -8 -10 356.093 105.264   1
   7  -8  -9 1489.29 188.569   1
   7  -8  -8 1727.96 193.928   1
   7  -8  -7-44.8294 67.2096   1
   7  -8  -6 10752.7 464.182   1
   7  -8  -5 13097.9 510.379   1
   7  -8  -4 1168.18 150.377   1
  -7   8   3 2955.60 104.132   4
  -7   8   3 2929.77 102.335   4
   7  -8  -3 2928.72 226.047   1
  -7   8   2 16586.8 366.928   4
  -7   8   2 17477.3 368.341   4
   7  -8  -2 16492.3 549.473   1
   7  -8  -2 17272.6 438.669   2
   7  -8  -1 38385.3 898.586   1
   7  -8  -1 37622.4 740.923   2
   7  -8   0 20921.5 607.181   1
   7  -8   0 20548.2 489.904   2
   7  -8   1 1437.73 147.233   1
   7  -8   1 1299.17 110.738   2
   7  -8   2 1041.09 125.191   1
   7  -8   3 1016.92 121.756   1
   7  -8   4 9980.15 371.898   1
   7  -8   5 71646.1 1304.25   1
  -7   8  -5 69452.1 1321.15   3
   7  -8   6 85428.4 1470.74   1
  -7   8  -6 81829.9 1509.43   3
  -7   8  -7 43045.9 950.237   3
   7  -8   7 42313.6 894.532   1
  -7   8  -8 10674.5 423.370   3
  -7   8  -9 270.906 73.8714   3
  -7   8 -10 382.876 90.5726   3
  -7   8 -11 11109.9 461.514   3
  -7   8 -12 42297.0 1029.63   3
  -7   8 -13 35692.7 950.454   3
  -7   8 -14 10143.7 477.585   3
  -7   8 -15 319.434 113.961   3
  -7   8 -16 167.441 98.1127   3
   7  -7 -15 2851.57 285.533   1
   7  -7 -14 1119.91 178.213   1
   7  -7 -13 265.665 111.585   1
   7  -7 -12 1908.09 219.952   1
   7  -7 -11 1170.54 172.778   1
   7  -7 -10 3510.94 279.527   1
   7  -7  -9 13986.4 556.092   1
   7  -7  -8 43079.4 1055.39   1
   7  -7  -7 41554.5 1010.88   1
   7  -7  -6 7175.65 363.216   1
   7  -7  -5 98.5347 58.5676   1
   7  -7  -4 157.244 70.8797   1
  -7   7   4 71.2807 13.6977   4
  -7   7   4 54.6886 14.0420   4
  -7   7   3 11785.9 255.619   4
   7  -7  -3 11522.6 438.333   1
  -7   7   2 67243.8 1063.27   4
   7  -7  -2 67239.9 1312.18   1
   7  -7  -2 70376.8 1111.26   2
  -7   7   1 137374. 2049.67   4
   7  -7  -1 140329. 2267.35   1
   7  -7  -1 142942. 2048.75   2
   7  -7   0 111048. 1868.77   1
   7  -7   0 112500. 1684.90   2
   7  -7   1 23685.0 615.985   1
   7  -7   2 1856.71 151.683   1
   7  -7   3 439.333 77.2361   1
   7  -7   4 16409.9 462.899   1
   7  -7   5 50531.1 952.753   1
  -7   7  -5 47847.3 1004.03   3
   7  -7   6 72068.1 1248.79   1
  -7   7  -6 70725.7 1340.26   3
  -7   7  -7 25221.2 673.340   3
  -7   7  -8-39.3241 60.9303   3
  -7   7  -9 1250.97 146.352   3
  -7   7 -10-37.6387 61.5668   3
  -7   7 -11 805.923 129.171   3
  -7   7 -12 3258.54 252.320   3
  -7   7 -13 2521.38 230.899   3
  -7   7 -14 445.393 120.345   3
  -7   7 -15 2016.20 219.898   3
  -7   7 -16 1328.18 194.937   3
  -7   7 -17 115.581 84.5128   3
   7  -6 -16 5435.78 395.332   1
   7  -6 -15 20224.9 763.792   1
   7  -6 -14 26155.4 864.622   1
   7  -6 -13 12837.1 571.307   1
   7  -6 -12 2503.94 243.015   1
   7  -6 -11 80.8267 72.7081   1
   7  -6 -10 1528.45 186.567   1
   7  -6  -9 31149.5 859.491   1
   7  -6  -8 81858.3 1599.67   1
   7  -6  -7 58783.6 1247.43   1
   7  -6  -6 33647.7 854.611   1
   7  -6  -5 1377.34 154.292   1
  -7   6   5 1354.30 49.5076   4
   7  -6  -4 262.060 74.7027   1
  -7   6   4 387.250 38.9876   4
  -7   6   3 4616.51 154.325   4
   7  -6  -3 4657.47 260.330   1
  -7   6   2 31044.9 585.549   4
   7  -6  -2 31379.9 751.709   1
   7  -6  -2 32301.4 565.709   2
  -7   6   1 51523.2 901.837   4
   7  -6  -1 52573.9 1046.37   1
   7  -6  -1 53398.7 844.152   2
  -7   6   0 19345.6 468.456   4
   7  -6   0 19898.3 537.727   1
   7  -6   1 1334.70 125.743   1
   7  -6   2 4126.11 211.674   1
   7  -6   3 2164.75 147.615   1
   7  -6   4 380.599 64.3026   1
  -7   6  -4 433.199 83.5964   3
   7  -6   5 1448.62 114.010   1
  -7   6  -5 1365.13 140.459   3
   7  -6   6 6347.34 244.406   1
  -7   6  -6 6338.00 299.630   3
  -7   6  -7 166.122 62.3291   3
  -7   6  -8 11836.4 441.576   3
  -7   6  -9 7565.43 357.933   3
  -7   6 -10 174.141 72.7238   3
  -7   6 -11 625.347 116.590   3
  -7   6 -12 5.53060 70.2154   3
  -7   6 -13 467.670 112.933   3
  -7   6 -14 285.183 109.096   3
  -7   6 -15 2498.65 250.707   3
  -7   6 -16 1000.05 176.277   3
  -7   6 -17 171.666 100.214   3
   7  -5 -16 4876.68 374.667   1
   7  -5 -15 19373.0 746.074   1
   7  -5 -14 26369.1 869.609   1
   7  -5 -13 10958.7 519.198   1
   7  -5 -12 0.30989 74.1965   1
   7  -5 -11 2159.06 216.313   1
   7  -5 -10 2006.24 202.167   1
   7  -5  -9 8166.51 398.201   1
   7  -5  -8 15784.3 561.960   1
   7  -5  -7 7461.94 361.203   1
   7  -5  -6 1569.58 165.330   1
  -7   5   6 1576.09 73.8869   4
   7  -5  -5 18139.3 556.450   1
  -7   5   5 18103.2 346.494   4
   7  -5  -4 6332.08 302.265   1
  -7   5   4 6224.98 184.366   4
  -7   5   3-0.99341 22.5441   4
   7  -5  -3 3.07749 49.9855   1
   7  -5  -2 13.3897 14.9787   2
   7  -5  -2 23.9579 45.7185   1
  -7   5   2-6.03653 23.3426   4
  -7   5   1 2102.67 126.991   4
   7  -5  -1 1886.53 151.306   1
   7  -5   0 49.9253 47.0193   1
  -7   5   0 236.350 44.7229   4
   7  -5   1 11774.7 366.981   1
   7  -5   2 21189.3 506.424   1
  -7   5  -3 2807.88 157.533   1
  -7   5  -3 2917.48 192.883   3
   7  -5   3 2899.64 156.501   1
  -7   5  -3 2661.97 125.454   2
  -7   5  -4 1058.62 101.463   1
  -7   5  -4 1222.39 129.443   3
  -7   5  -4 1095.03 87.3802   2
   7  -5   4 1309.19 100.789   1
   7  -5   5 362.163 54.9472   1
  -7   5  -5 277.490 47.0885   2
  -7   5  -5 347.246 77.0751   3
  -7   5  -5 357.891 62.8091   1
   7  -5   6 6679.30 226.575   1
  -7   5  -6 7174.12 321.619   3
  -7   5  -6 6607.27 233.954   1
  -7   5  -7 152.976 72.2609   3
  -7   5  -7 184.342 41.6183   1
  -7   5  -8 1045.69 137.628   3
  -7   5  -9 1907.56 180.796   3
  -7   5 -10 231.786 75.0684   3
  -7   5 -11 235.013 83.9404   3
  -7   5 -12 6608.06 365.372   3
  -7   5 -13 17150.7 631.496   3
  -7   5 -14 2780.51 257.609   3
  -7   5 -15 32.3549 82.2812   3
  -7   5 -16 295.872 106.955   3
  -7   5 -17 402.624 127.841   3
   7  -4 -16 343.465 113.424   1
   7  -4 -15 1964.41 236.746   1
   7  -4 -14 2000.69 232.663   1
   7  -4 -13 1204.93 176.075   1
   7  -4 -12 6903.21 394.137   1
   7  -4 -11 2793.03 243.705   1
   7  -4 -10 870.560 142.264   1
   7  -4  -9 247.864 95.1852   1
   7  -4  -9 200.188 45.0017   4
   7  -4  -8 1242.44 87.8260   4
  -7   4   8 1154.09 81.9359   4
   7  -4  -8 1303.86 155.781   1
  -7   4   7 705.987 63.1413   4
   7  -4  -7 764.790 69.9078   4
   7  -4  -7 659.951 115.510   1
   7  -4  -6 5740.54 298.944   1
   7  -4  -6 5350.18 191.829   4
  -7   4   6 5233.13 175.321   4
   7  -4  -5 16182.4 508.054   1
  -7   4   5 15340.9 347.573   4
   7  -4  -4 2915.19 198.561   1
  -7   4   4 2668.27 128.702   4
  -7   4   3 871.332 78.9342   4
   7  -4  -3 740.476 33.0437   2
   7  -4  -3 812.078 105.232   1
   7  -4  -2 1367.83 129.000   1
  -7   4   2 1543.64 109.118   4
   7  -4  -1 8043.60 301.508   1
  -7   4   1 7834.08 268.955   4
   7  -4   0 19284.3 489.701   1
  -7   4  -1 3712.63 179.829   1
   7  -4   1 3854.59 185.406   1
  -7   4  -2 2737.71 145.496   1
  -7   4  -2 2618.52 176.277   3
   7  -4   2 2862.08 150.684   1
  -7   4  -2 2620.15 100.917   2
  -7   4  -3 817.583 79.8510   1
   7  -4   3 922.596 81.2380   1
  -7   4  -3 928.439 112.447   3
  -7   4  -3 691.241 58.9710   2
  -7   4  -4 109.277 33.9768   2
   7  -4   4 108.640 31.8618   1
  -7   4  -4 76.7207 30.8261   1
  -7   4  -4 86.4276 55.7875   3
   7  -4   5 10694.1 263.885   1
  -7   4  -5 9721.30 262.654   1
  -7   4  -5 10791.1 391.404   3
  -7   4  -6 23861.1 442.740   1
  -7   4  -6 26100.7 657.015   3
   7  -4   6 21139.4 434.258   1
  -7   4  -7 25129.3 449.767   1
  -7   4  -7 24988.1 681.070   3
  -7   4  -8 1480.08 155.110   3
  -7   4  -9 1168.72 148.489   3
  -7   4 -10 13.6555 67.0736   3
  -7   4 -11 114.572 79.5509   3
  -7   4 -12 2733.94 237.931   3
  -7   4 -13 6247.21 375.978   3
  -7   4 -14 1930.26 219.783   3
  -7   4 -15 53.5915 82.9996   3
  -7   4 -16 1924.78 242.886   3
  -7   4 -17-151.960 116.095   3
   7  -3 -16 51.4736 77.3315   1
   7  -3 -15-56.2942 86.5005   1
   7  -3 -14 1091.35 167.723   1
   7  -3 -13 224.516 94.4831   1
   7  -3 -12 1247.30 176.085   1
   7  -3 -11 694.209 137.004   1
   7  -3 -11 467.101 70.4903   4
   7  -3 -10 37.3563 63.3087   1
   7  -3 -10 42.8922 33.0440   4
   7  -3  -9 258.336 86.2238   1
   7  -3  -9 258.226 53.7424   4
   7  -3  -8 9704.89 416.146   1
  -7   3   8 9649.64 288.299   4
   7  -3  -8 9535.94 300.973   4
   7  -3  -7 18941.0 584.498   1
   7  -3  -7 18597.7 450.444   4
  -7   3   7 18654.0 428.923   4
   7  -3  -6 6303.08 313.229   1
   7  -3  -6 6503.18 238.965   4
  -7   3   6 6193.08 218.480   4
   7  -3  -5 1784.53 163.398   1
   7  -3  -5 1718.73 120.020   4
  -7   3   5 1815.14 115.058   4
   7  -3  -4 830.436 85.0378   4
  -7   3   4 1049.87 90.2047   4
   7  -3  -4 1131.89 127.261   1
   7  -3  -3 235.776 61.3241   1
   7  -3  -3 260.243 55.9267   4
  -7   3   3 243.859 50.5358   4
   7  -3  -2 1791.88 141.240   1
   7  -3  -1 39212.0 791.694   1
   7  -3   0 42460.2 812.872   1
  -7   3  -1 2759.62 178.994   3
   7  -3   1 2958.51 154.759   1
   7  -3   2 990.199 84.1453   1
  -7   3  -2 772.047 99.7160   3
  -7   3  -2 877.781 50.2588   2
   7  -3   3 376.283 50.8013   1
  -7   3  -3 271.591 69.2383   3
  -7   3  -4 203.376 69.2228   3
   7  -3   4 121.733 27.4366   1
  -7   3  -5 312.187 80.6455   3
   7  -3   5 204.486 28.8559   1
  -7   3  -6 9021.89 370.388   3
  -7   3  -7 6315.36 315.269   3
  -7   3  -8 3171.39 230.357   3
  -7   3  -9 6828.79 350.049   3
  -7   3 -10 551.856 111.867   3
  -7   3 -11 447.271 111.271   3
  -7   3 -12 290.074 101.905   3
  -7   3 -13 334.264 98.2364   3
  -7   3 -14 114.629 94.7012   3
  -7   3 -15 1350.32 207.268   3
  -7   3 -16 2167.52 260.725   3
   7  -2 -16 471.093 136.906   1
   7  -2 -15 1800.21 231.242   1
   7  -2 -14 6140.20 393.757   1
   7  -2 -13 14494.8 596.461   1
   7  -2 -12 1065.99 117.334   4
   7  -2 -12 1186.19 170.208   1
   7  -2 -11 79.0595 64.4413   1
   7  -2 -11 53.7916 43.3760   4
   7  -2 -10 706.755 127.152   1
   7  -2 -10 722.345 92.3577   4
   7  -2  -9 353.697 96.6437   1
   7  -2  -9 326.965 66.5982   4
   7  -2  -8 9977.16 418.512   1
   7  -2  -8 10028.7 335.885   4
   7  -2  -7 16004.0 529.531   1
   7  -2  -7 16825.2 450.867   4
   7  -2  -6 5822.87 296.101   1
   7  -2  -6 5979.32 248.438   4
   7  -2  -6 5559.94 165.463   2
   7  -2  -5 728.281 106.924   1
   7  -2  -5 821.239 94.7633   4
   7  -2  -5 750.889 44.8450   2
   7  -2  -4 3706.58 218.338   1
   7  -2  -4 3750.63 196.708   4
   7  -2  -3 946.190 108.260   1
   7  -2  -3 586.295 80.1755   4
   7  -2  -2 998.273 106.069   4
   7  -2  -2 829.998 100.463   1
   7  -2  -1 5387.94 230.930   1
   7  -2  -1 4965.74 238.768   4
   7  -2   0 2114.95 138.474   1
  -7   2   0 2043.92 150.843   3
   7  -2   1 838.580 80.9776   1
  -7   2  -1 852.636 100.818   3
  -7   2  -2 13126.1 411.777   3
   7  -2   2 14097.1 337.420   1
  -7   2  -3 7562.76 312.160   3
   7  -2   3 7494.37 212.903   1
   7  -2   4 663.328 48.8023   1
  -7   2  -4 516.799 90.7363   3
  -7   2  -5 933.664 122.131   3
  -7   2  -6 2833.87 204.569   3
  -7   2  -7 1886.88 176.935   3
  -7   2  -8 1750.74 174.938   3
  -7   2  -9 4260.89 276.036   3
  -7   2 -10 372.336 106.087   3
  -7   2 -11 116.521 79.3596   3
  -7   2 -12 550.512 132.117   3
  -7   2 -13 16986.3 665.402   3
  -7   2 -14 17532.3 701.667   3
  -7   2 -15 2599.80 274.472   3
  -7   2 -16 511.716 148.261   3
   7  -1 -16 86.4745 79.6724   1
   7  -1 -15 176.880 116.717   1
   7  -1 -14 4348.49 326.925   1
   7  -1 -13 1814.17 213.149   1
   7  -1 -13 1732.26 160.504   4
   7  -1 -12 1062.47 162.220   1
   7  -1 -12 1162.32 129.647   4
   7  -1 -11 1087.12 157.225   1
   7  -1 -11 1063.76 125.082   4
   7  -1 -10 13.6036 66.2725   1
   7  -1 -10 77.2628 53.6273   4
   7  -1  -9 354.523 73.7944   4
   7  -1  -8 140.198 38.5042   2
   7  -1  -8 163.130 56.4973   4
   7  -1  -7 992.354 109.624   4
   7  -1  -7 957.075 75.4472   2
   7  -1  -6 1008.38 112.778   4
   7  -1  -6 1072.27 70.6994   2
   7  -1  -5 16952.1 479.602   4
   7  -1  -4 12485.0 404.560   4
   7  -1  -3 198.294 63.4397   4
   7  -1  -2 201.415 61.6105   1
   7  -1  -2 173.430 60.7983   4
  -7   1   2 103.310 43.0705   3
   7  -1  -1 4653.39 214.504   1
  -7   1   1 4605.01 216.808   3
   7  -1  -1 4585.94 239.525   4
   7  -1   0 4715.12 205.326   1
  -7   1   0 4627.22 224.997   3
   7  -1   0 5236.52 259.590   4
   7  -1   1 2382.29 134.287   1
  -7   1  -1 2222.31 161.096   3
   7  -1   2 973.496 78.5564   1
  -7   1  -2 992.128 109.466   3
  -7   1  -3 1968.90 155.793   3
   7  -1   3 1985.71 98.3529   1
   7  -1   4 49.3758 18.9439   1
  -7   1  -4 29.9283 47.1189   3
  -7   1  -5 8530.41 354.571   3
  -7   1  -6 49399.8 1050.00   3
  -7   1  -7 52665.1 1122.05   3
  -7   1  -8 34001.0 860.245   3
  -7   1  -9 5430.51 320.305   3
  -7   1 -10 133.491 82.0919   3
  -7   1 -11 329.856 107.388   3
  -7   1 -12 15117.2 617.875   3
  -7   1 -13 54039.3 1341.14   3
  -7   1 -14 40318.6 1147.37   3
  -7   1 -15 19619.8 786.094   3
   7   0 -16 109.535 90.3294   1
   7   0 -15 22.9637 85.4423   1
   7   0 -14 214.246 75.4991   4
   7   0 -13 64.3002 61.0568   4
   7   0 -12 4146.36 256.024   4
   7   0 -11 5826.38 300.260   4
   7   0 -10 1264.41 138.988   4
   7   0  -9 382.356 87.8714   4
   7   0  -8 3552.61 219.223   4
   7   0  -7 19104.9 540.519   4
   7   0  -7 18895.1 419.684   2
   7   0  -6 14300.6 461.442   4
   7   0  -5 185.910 62.7767   4
   7   0  -4 34.8279 46.6922   4
   7   0  -3 790.648 105.321   4
  -7   0   3 659.330 79.1205   3
  -7   0   2 10514.3 333.940   3
   7   0  -2 11091.5 395.756   4
  -7   0   1 62810.7 1114.40   3
   7   0  -1 61874.4 1201.10   4
  -7   0   1 63308.3 917.282   2
  -7   0   0 149183. 2262.06   3
   7   0   0 145946. 2360.12   4
  -7   0   0 147966. 2033.66   2
  -7   0  -1 101342. 1668.93   3
   7   0   1 103130. 1769.78   4
   7   0   2 13459.8 334.184   1
  -7   0  -2 12958.0 418.990   3
   7   0   3 2067.29 103.110   1
  -7   0  -3 1950.06 159.631   3
   7   0   4 2674.63 95.7486   1
  -7   0  -4 2783.43 196.083   3
   7   0   4 2977.74 101.208   1
  -7   0  -5 27075.9 702.919   3
  -7   0  -6 74294.0 1417.32   3
  -7   0  -7 118454. 2055.93   3
  -7   0  -8 56901.1 1228.08   3
  -7   0  -9 5749.07 338.750   3
  -7   0 -10 511.025 131.213   3
  -7   0 -11 133.947 78.0909   3
  -7   0 -12 5778.06 383.161   3
  -7   0 -13 17341.3 701.618   3
  -7   0 -14 18559.4 755.380   3
  -7   0 -15 4404.51 374.993   3
   7   1 -15 2672.52 236.118   4
   7   1 -14 10772.6 465.664   4
   7   1 -13 14956.1 546.169   4
   7   1 -12 7228.24 360.818   4
   7   1 -11 220.089 72.5929   4
   7   1 -10 1842.23 174.656   4
   7   1  -9 3724.19 241.703   4
   7   1  -8 40429.5 923.025   4
   7   1  -7 100274. 1742.61   4
  -7  -1   6 87719.5 1383.82   3
   7   1  -6 86344.6 1558.85   4
  -7  -1   5 40847.3 757.784   3
   7   1  -5 39203.2 894.765   4
  -7  -1   4 3748.43 179.217   3
   7   1  -4 3718.17 233.065   4
  -7  -1   3 551.646 75.4356   3
   7   1  -3 556.784 96.3479   4
  -7  -1   2 9499.70 314.834   3
   7   1  -2 9551.84 381.974   4
  -7  -1   1 74509.8 1261.80   3
   7   1  -1 73355.8 1388.19   4
  -7  -1   1 73717.3 1120.56   2
  -7  -1   0 136527. 2095.11   3
   7   1   0 134056. 2221.94   4
  -7  -1   0 134603. 1930.18   2
  -7  -1  -1 85373.0 1468.89   3
   7   1   1 88045.9 1595.75   4
  -7  -1  -2 14410.2 450.908   3
   7   1   2 15773.4 526.970   4
   7   1   3 340.746 48.6185   1
  -7  -1  -3 435.651 85.5116   3
  -7  -1  -4 210.567 69.8305   3
   7   1   4 230.932 32.7069   1
   7   1   5 1157.40 48.1629   1
  -7  -1  -5 1194.12 141.785   3
  -7  -1  -6 15323.7 526.414   3
  -7  -1  -7 23195.2 692.266   3
  -7  -1  -8 5447.72 326.753   3
  -7  -1  -9 415.869 107.261   3
  -7  -1 -10 390.063 116.252   3
  -7  -1 -11 217.014 89.6257   3
  -7  -1 -12 1107.18 183.758   3
  -7  -1 -13 106.036 98.9491   3
  -7  -1 -14 1769.48 247.078   3
   7   2 -16 571.832 129.670   4
   7   2 -15 8545.38 439.380   4
   7   2 -14 31416.9 892.269   4
   7   2 -13 45280.9 1101.42   4
   7   2 -12 20703.1 671.448   4
   7   2 -11 2397.07 211.440   4
   7   2 -10 77.8089 55.3999   4
   7   2  -9 3449.92 243.748   4
  -7  -2   8 22374.8 469.630   3
   7   2  -8 22926.1 669.392   4
  -7  -2   7 45718.9 795.045   3
   7   2  -7 44678.5 1018.70   4
  -7  -2   6 45235.5 799.092   3
   7   2  -6 43930.3 994.655   4
  -7  -2   5 4201.99 181.630   3
   7   2  -5 4463.40 267.483   4
  -7  -2   4 173.156 40.0003   3
   7   2  -4 116.752 74.9140   4
  -7  -2   3 84.0945 37.3380   3
   7   2  -3-48.8662 67.1468   4
  -7  -2   2 70.8038 31.5567   2
  -7  -2   2 15.4014 35.4883   3
   7   2  -2 97.7603 71.6648   4
  -7  -2   1 5289.05 236.597   3
   7   2  -1 5353.68 301.396   4
  -7  -2   1 5370.39 200.392   2
  -7  -2   0 7713.05 298.528   3
   7   2   0 7297.06 351.391   4
  -7  -2   0 7410.32 244.171   2
  -7  -2  -1 2279.10 166.457   3
   7   2   1 2291.46 199.354   4
  -7  -2  -2 1875.37 159.131   3
   7   2   2 1689.73 116.817   1
   7   2   2 1897.20 187.595   4
  -7  -2  -3 4001.07 240.535   3
   7   2   3 4166.53 274.797   4
  -7  -2  -4 109.159 59.2521   3
  -7  -2  -5 2174.53 192.761   3
  -7  -2  -6 64.7851 72.7600   3
  -7  -2  -7 1594.70 180.794   3
  -7  -2  -8 19.9295 83.8866   3
  -7  -2  -9 1180.31 164.689   3
  -7  -2 -10 1147.42 178.407   3
  -7  -2 -11 77.7291 106.438   3
  -7  -2 -12 613.181 159.350   3
  -7  -2 -13 2980.46 312.414   3
   7   3 -16 345.504 101.908   4
   7   3 -15 1802.97 217.177   4
   7   3 -14 7680.92 423.772   4
   7   3 -13 11317.7 510.599   4
   7   3 -12 999.645 152.895   4
   7   3 -11 442.336 111.161   4
   7   3 -10 844.766 138.341   4
   7   3  -9 197.977 85.5176   4
   7   3  -8 87.2717 65.8124   4
   7   3  -7 2645.26 220.777   4
   7   3  -6 1368.83 161.320   4
  -7  -3   5 1525.48 103.879   3
   7   3  -5 1480.45 167.183   4
  -7  -3   4 6479.45 235.932   3
   7   3  -4 6072.25 330.119   4
  -7  -3   3 1385.58 110.912   3
   7   3  -3 1424.10 165.125   4
  -7  -3   3 1509.04 116.173   2
  -7  -3   2 1719.48 129.884   3
   7   3  -2 1795.88 178.829   4
  -7  -3   2 1725.35 123.262   2
   7   3  -1-26.7743 79.0844   4
  -7  -3   1 33.3479 34.7659   2
  -7  -3   0 2137.54 159.596   3
   7   3   0 2151.19 201.832   4
  -7  -3   0 2137.51 140.740   2
  -7  -3  -1 4202.95 233.209   3
   7   3   1 4240.78 278.889   4
  -7  -3  -2 89.0071 58.8540   3
   7   3   2 90.5350 68.6131   4
  -7  -3  -3 3855.49 243.900   3
   7   3   3 4422.88 294.640   4
  -7  -3  -4 318.081 80.9274   3
   7   3   4 422.355 105.862   4
  -7  -3  -5 163.099 72.6145   3
  -7  -3  -6 4735.40 307.449   3
  -7  -3  -7 12269.1 517.264   3
  -7  -3  -8 12509.3 544.423   3
  -7  -3  -9 14.4670 92.6874   3
  -7  -3 -10 1054.28 180.295   3
  -7  -3 -11 304.508 139.843   3
  -7  -3 -12 1180.84 205.525   3
  -7  -3 -13 5703.88 423.606   3
   7   4 -15 46.2554 66.8607   4
   7   4 -14 63.0959 74.7279   4
   7   4 -13 190.513 86.4993   4
   7   4 -12 144.582 80.1780   4
   7   4 -11 1970.55 212.760   4
   7   4 -10 1999.10 211.241   4
   7   4  -9 230.575 90.9833   4
   7   4  -8 34.2687 59.1543   4
   7   4  -7 3199.34 253.732   4
   7   4  -6 4779.79 306.730   4
   7   4  -5 593.691 119.933   4
   7   4  -4 146.763 84.3170   4
  -7  -4   3 625.405 84.7308   2
  -7  -4   3 726.912 85.3400   3
   7   4  -3 500.168 107.440   4
  -7  -4   2 31.4651 38.2455   2
  -7  -4   2 11.4384 38.5618   3
   7   4  -2 45.8079 65.4230   4
  -7  -4   1 3110.76 192.296   3
   7   4  -1 2915.49 238.604   4
  -7  -4   1 3149.88 184.182   2
  -7  -4   0 29248.3 707.770   3
   7   4   0 29731.7 828.732   4
  -7  -4   0 28677.7 662.224   2
  -7  -4  -1 23990.3 645.752   3
   7   4   1 24306.2 737.568   4
  -7  -4  -2 3129.38 222.148   3
   7   4   2 2803.03 243.114   4
  -7  -4  -3 29.4089 60.1410   3
   7   4   3 46.2897 74.5801   4
  -7  -4  -4 1001.63 142.304   3
   7   4   4 979.211 158.898   4
  -7  -4  -5 626.443 122.016   3
  -7  -4  -6 3588.30 279.252   3
  -7  -4  -7 12127.0 536.825   3
  -7  -4  -8 7337.97 426.393   3
  -7  -4  -9 385.670 131.675   3
  -7  -4 -10 1072.63 187.379   3
  -7  -4 -11 595.690 161.273   3
  -7  -4 -12-2.51026 97.4130   3
   7   5 -13 4070.85 330.924   4
   7   5 -12 5001.89 358.830   4
   7   5 -11-10.9637 78.3898   4
   7   5 -10 248.346 109.591   4
   7   5  -9-2.73353 67.2824   4
   7   5  -8 1684.22 198.842   4
   7   5  -7 9713.57 465.606   4
   7   5  -6 16292.8 614.041   4
   7   5  -5 3858.16 289.343   4
   7   5  -4 15.9455 71.9469   4
  -7  -5   3 266.358 65.7809   2
   7   5  -3 305.602 99.1692   4
  -7  -5   2 31.3467 43.2768   2
   7   5  -2-2.16893 64.1008   4
  -7  -5   1 1141.31 125.074   3
   7   5  -1 920.107 149.637   4
  -7  -5   1 1132.91 124.920   2
  -7  -5   0 8528.10 356.543   3
   7   5   0 9013.12 441.403   4
  -7  -5   0 8147.79 338.613   2
  -7  -5  -1 5026.79 282.875   3
   7   5   1 5304.54 338.805   4
  -7  -5  -2 75.8272 68.9603   3
   7   5   2 135.129 91.1695   4
  -7  -5  -3 2514.08 220.017   3
   7   5   3 2971.32 264.865   4
  -7  -5  -4 649.006 132.665   3
   7   5   4 613.386 135.538   4
  -7  -5  -5 1820.25 202.875   3
  -7  -5  -6 214.162 99.4849   3
  -7  -5  -7-35.6277 85.4654   3
  -7  -5  -8 102.371 91.5133   3
  -7  -5  -9 952.699 172.529   3
  -7  -5 -10 1494.77 220.188   3
  -7  -5 -11 122.768 105.469   3
   7   6 -11 73.9045 90.4674   4
   7   6 -10 144.269 94.3979   4
   7   6  -9 81.2017 84.4484   4
   7   6  -8-55.8249 94.1814   4
   7   6  -7 95.1399 70.6520   4
   7   6  -6 2717.36 253.244   4
   7   6  -5-6.75339 73.8578   4
   7   6  -4 3163.11 275.167   4
  -7  -6   4 3405.10 225.604   2
  -7  -6   3 812.909 112.931   2
   7   6  -3 958.322 158.941   4
  -7  -6   2 545.307 98.6740   2
   7   6  -2 688.875 137.208   4
   7   6  -1 2371.84 239.026   4
  -7  -6   1 2272.42 184.740   2
   7   6   0 1210.42 176.651   4
  -7  -6   0 1207.66 138.081   2
  -7  -6  -1-5.82339 50.0661   3
   7   6   1 113.129 91.1374   4
  -7  -6  -1 93.5487 59.9357   2
  -7  -6  -2 197.778 76.8770   3
   7   6   2 178.983 86.1329   4
  -7  -6  -3 2058.15 203.525   3
   7   6   3 2046.85 232.847   4
  -7  -6  -4 72.4965 63.8972   3
   7   6   4 168.554 100.529   4
   7   6   5 1753.54 214.259   4
  -7  -6  -5 1877.26 209.361   3
  -7  -6  -6-120.176 100.298   3
  -7  -6  -7 1376.09 194.336   3
  -7  -6  -8 6071.87 399.506   3
  -7  -6  -9 3129.14 294.055   3
  -7  -6 -10 13.6304 83.2751   3
   7   7  -8 2120.24 250.562   4
   7   7  -7 403.611 120.593   4
   7   7  -6 386.498 118.693   4
   7   7  -5-54.4344 82.2498   4
  -7  -7   4 977.504 136.716   2
   7   7  -4 916.433 162.353   4
  -7  -7   3 365.867 91.5857   2
   7   7  -3 158.126 88.9961   4
  -7  -7   2-14.3453 69.5753   2
   7   7  -2-7.64633 83.7099   4
  -7  -7   1 9.29611 52.9036   2
   7   7  -1 63.4911 74.0730   4
   7   7   0 6590.49 411.301   4
  -7  -7   0 6679.18 348.541   2
   7   7   1 20417.3 748.429   4
  -7  -7  -1 19658.3 638.436   2
   7   7   2 10345.6 522.392   4
   7   7   3 1957.49 231.047   4
  -7  -7  -4 22.8389 69.7400   3
   7   7   4 50.2111 89.0333   4
  -7  -7  -5 354.780 102.508   3
   7   7   5 431.469 124.267   4
  -7  -7  -6 5907.04 378.651   3
  -7  -7  -7 25388.3 846.601   3
  -7  -7  -8 33412.8 1022.08   3
  -7  -7  -9 16693.6 710.039   3
   7   8  -4 6689.42 437.110   4
  -7  -8   4 6176.31 352.955   2
  -7  -8   3 286.461 93.4432   2
   7   8  -3 343.105 115.252   4
  -7  -8   2-32.4103 86.4927   2
   7   8  -2 30.5086 78.0782   4
   7   8  -1 5124.98 376.962   4
  -7  -8   1 4273.73 293.126   2
   7   8   0 32112.9 1002.59   4
  -7  -8   0 30628.6 867.309   2
   7   8   1 55161.0 1387.25   4
  -7  -8  -1 53325.3 1235.59   2
   7   8   2 31204.8 992.099   4
  -7  -8  -2 30206.0 873.152   2
   7   8   3 11103.6 573.309   4
  -7  -9   3 742.032 139.692   2
  -7  -9   2-111.713 96.4781   2
  -7  -9   1 657.002 127.694   2
  -7  -9   0 5159.15 344.444   2
  -7  -9  -1 10183.6 493.462   2
  -7  -9  -2 7121.00 415.120   2
  -7  -9  -3 1241.67 181.934   2
   8 -15  -3 164.040 96.9318   2
   8 -15  -2 1671.32 209.605   2
   8 -15  -1 235.814 98.5527   2
   8 -15   0 1375.39 184.559   2
   8 -15   1 2213.57 235.138   2
   8 -14  -6 364.448 106.438   2
   8 -14  -5 925.086 159.615   2
   8 -14  -4 2232.30 226.167   2
   8 -14  -3 264.996 107.966   2
   8 -14  -2 685.178 133.465   2
   8 -14  -1-54.0999 76.5517   2
   8 -14  -1 98.7976 83.5098   1
   8 -14   0 1124.67 161.922   2
   8 -14   0 1261.55 199.614   1
   8 -14   1 2249.94 258.586   1
   8 -14   1 2332.42 229.182   2
   8 -14   2-150.125 107.021   1
   8 -14   3 425.491 131.117   1
   8 -14   4-26.6703 86.1285   1
   8 -14   5-33.7155 76.4498   1
  -8  14  -8 3704.89 293.337   4
  -8  14  -9 127.842 79.9821   4
   8 -13  -5 409.668 132.484   1
   8 -13  -5 202.134 79.4361   2
   8 -13  -4 56.7539 78.4329   1
   8 -13  -4 75.2191 71.8922   2
   8 -13  -3 27.2390 79.5285   1
   8 -13  -3 158.788 72.3125   2
   8 -13  -2 3.91481 57.9701   2
   8 -13  -2 168.721 94.5868   1
   8 -13  -1 590.042 116.212   2
   8 -13  -1 644.030 146.033   1
   8 -13   0 5314.71 318.839   2
   8 -13   0 5296.30 369.516   1
   8 -13   1 7311.21 433.116   1
   8 -13   1 6548.72 356.117   2
   8 -13   2 103.202 93.2328   1
   8 -13   3 3584.18 304.459   1
   8 -13   4 2483.86 258.963   1
   8 -13   5 2767.03 264.112   1
  -8  13  -5 3052.56 236.479   4
  -8  13  -6 2225.51 211.670   3
   8 -13   6 2558.43 253.787   1
  -8  13  -6 2431.69 216.677   4
  -8  13  -7 1206.17 156.911   3
  -8  13  -7 1069.49 150.516   4
  -8  13  -8 19.7886 60.5405   4
  -8  13  -9 8562.13 453.913   4
  -8  13 -10 13086.0 582.831   4
   8 -12  -8 38.6707 84.7817   1
   8 -12  -7 3275.01 309.564   1
   8 -12  -6 5624.35 396.714   1
   8 -12  -5 201.876 104.701   1
   8 -12  -4 6007.40 328.067   2
   8 -12  -4 6077.33 398.893   1
   8 -12  -3 13440.8 498.280   2
   8 -12  -3 13747.3 597.118   1
   8 -12  -2 4377.56 273.079   2
   8 -12  -2 4420.22 327.373   1
   8 -12  -1 1122.95 134.945   2
   8 -12  -1 1052.92 171.889   1
   8 -12   0 485.710 95.1466   2
   8 -12   0 632.409 129.955   1
   8 -12   1 1376.33 185.695   1
   8 -12   1 1394.95 152.660   2
   8 -12   2 17689.4 659.433   1
   8 -12   3 34224.6 963.177   1
  -8  12  -3 34779.7 815.076   4
   8 -12   4 27254.2 839.625   1
  -8  12  -4 27095.0 722.029   4
   8 -12   5 3017.98 259.183   1
  -8  12  -5 3264.47 235.147   4
   8 -12   6 6.00481 74.8747   1
  -8  12  -6 2.54906 47.0617   3
  -8  12  -6-34.2383 60.0808   4
  -8  12  -7 89.5625 87.2321   3
  -8  12  -7 17.2920 71.3967   4
  -8  12  -8 1770.15 186.425   3
  -8  12  -8 1568.05 186.080   4
  -8  12  -9 12541.3 513.810   3
  -8  12  -9 12506.1 546.560   4
  -8  12 -10 16397.7 599.861   3
  -8  12 -10 16294.9 646.540   4
  -8  12 -11 8066.87 458.687   4
   8 -11 -10 13029.7 625.779   1
   8 -11  -9 4818.79 369.110   1
   8 -11  -8 1043.91 189.391   1
   8 -11  -7 254.976 111.277   1
   8 -11  -6 2033.30 233.927   1
   8 -11  -5 13976.9 602.067   1
   8 -11  -4 39769.8 1066.65   1
   8 -11  -4 37942.2 886.308   2
   8 -11  -3 34665.7 977.291   1
   8 -11  -3 35111.2 827.271   2
   8 -11  -2 6014.17 369.500   1
   8 -11  -2 6418.42 307.051   2
   8 -11  -1 755.224 107.213   2
   8 -11  -1 911.299 146.852   1
   8 -11   0 35.1672 43.2290   2
   8 -11   0 31.6363 88.0834   1
   8 -11   1 1072.37 154.523   1
   8 -11   1 1147.96 129.264   2
  -8  11  -2 9326.07 351.973   4
   8 -11   2 9441.99 442.934   1
   8 -11   3 26678.3 788.811   1
  -8  11  -3 27265.3 685.590   4
   8 -11   4 18380.8 629.664   1
  -8  11  -4 17392.0 547.291   4
  -8  11  -5 1253.81 153.603   4
   8 -11   5 1154.62 163.648   1
   8 -11   6 826.240 133.943   1
  -8  11  -6 491.350 94.0635   3
  -8  11  -6 835.913 124.833   4
  -8  11  -7 2110.55 197.823   3
   8 -11   7 2203.23 210.120   1
  -8  11  -7 2001.78 191.951   4
  -8  11  -8 1971.55 190.624   3
  -8  11  -8 1646.60 181.413   4
  -8  11  -9 15.0481 79.1507   3
  -8  11  -9-19.0523 72.7668   4
  -8  11 -10 1236.26 159.565   3
  -8  11 -10 1283.77 178.788   4
  -8  11 -11 1254.39 160.389   3
  -8  11 -11 1316.18 180.837   4
  -8  11 -12-34.1608 77.1335   3
  -8  11 -12 88.5403 70.2248   4
   8 -10 -11 22170.5 823.435   1
   8 -10 -10 26458.8 896.726   1
   8 -10  -9 6200.25 406.740   1
   8 -10  -8 257.699 106.714   1
   8 -10  -7 93.4189 83.7187   1
   8 -10  -6 63.0051 81.0663   1
   8 -10  -5 2684.13 248.771   1
   8 -10  -4 12814.1 544.635   1
   8 -10  -3 9716.03 461.931   1
   8 -10  -3 9976.29 365.291   2
   8 -10  -2 1917.94 204.098   1
   8 -10  -2 1780.55 147.123   2
   8 -10  -1 889.421 104.571   2
   8 -10  -1 868.150 143.348   1
  -8  10   0 3460.84 178.495   4
   8 -10   0 3565.15 259.705   1
   8 -10   0 3437.87 202.738   2
  -8  10  -1 14027.1 413.989   4
   8 -10   1 13774.7 521.852   1
   8 -10   1 13115.2 426.819   2
  -8  10  -2 4852.58 240.525   4
   8 -10   2 4958.89 300.184   1
   8 -10   3-3.14028 53.4520   1
  -8  10  -3 2.58877 43.0793   4
   8 -10   4-34.0907 65.0561   1
   8 -10   5 132.580 70.1769   1
   8 -10   6 1562.95 167.175   1
  -8  10  -6 1322.77 152.125   3
  -8  10  -7 10138.3 431.641   3
   8 -10   7 10197.5 428.630   1
  -8  10  -8 12277.6 488.005   3
  -8  10  -9 3406.33 254.412   3
  -8  10 -10 72.6125 63.1067   3
  -8  10 -11-132.726 103.612   3
  -8  10 -12 1353.23 170.613   3
  -8  10 -13 455.299 114.837   3
   8  -9 -12-62.7453 90.4096   1
   8  -9 -11 1069.28 178.324   1
   8  -9 -10 2471.41 254.310   1
   8  -9  -9 361.367 110.225   1
   8  -9  -8 148.986 85.0323   1
   8  -9  -7 1644.30 201.422   1
   8  -9  -6 17500.5 643.299   1
   8  -9  -5 15327.9 589.536   1
   8  -9  -4 5398.98 333.714   1
   8  -9  -3 65.7693 60.5634   1
   8  -9  -3 94.2932 33.8365   2
   8  -9  -2-2.96599 68.0804   1
   8  -9  -2 85.1905 42.2750   2
   8  -9  -1 601.798 79.2181   2
   8  -9  -1 432.509 88.6021   1
  -8   9   1 525.503 67.4247   4
   8  -9   0 3064.78 229.588   1
   8  -9   0 2769.12 167.856   2
   8  -9   1 12323.0 469.525   1
   8  -9   2 3866.51 249.972   1
   8  -9   3 694.206 111.860   1
   8  -9   4-18.6387 57.7824   1
   8  -9   5 1424.22 148.861   1
  -8   9  -5 1441.59 155.362   3
   8  -9   6 8338.00 352.079   1
  -8   9  -6 6999.56 345.922   3
  -8   9  -7 2143.90 194.840   3
   8  -9   7 2116.83 175.930   1
  -8   9  -8 562.058 110.504   3
  -8   9  -9 1110.13 149.164   3
  -8   9 -10 2585.41 225.289   3
  -8   9 -11-100.080 85.2272   3
  -8   9 -12 1683.44 188.425   3
  -8   9 -13 6154.72 374.434   3
  -8   9 -14 3206.80 275.379   3
  -8   9 -15 366.564 111.546   3
   8  -8 -13 4397.74 358.195   1
   8  -8 -12 9290.80 503.108   1
   8  -8 -11 2987.98 283.455   1
   8  -8 -10 140.052 79.3246   1
   8  -8  -9 1661.04 200.187   1
   8  -8  -8 1636.50 196.466   1
   8  -8  -7 202.367 96.0531   1
   8  -8  -6 2424.49 222.986   1
   8  -8  -5 2540.71 224.339   1
   8  -8  -4 14.0414 67.9479   1
   8  -8  -3 1924.70 189.795   1
   8  -8  -3 2143.58 132.122   2
   8  -8  -2 1583.52 168.964   1
   8  -8  -2 1845.10 121.000   2
   8  -8  -1 9670.49 407.828   1
   8  -8  -1 9911.75 298.447   2
   8  -8   0 5025.93 284.261   1
   8  -8   1 723.755 112.221   1
   8  -8   2 1663.02 154.701   1
   8  -8   3 11361.1 410.459   1
   8  -8   4 3534.37 213.630   1
   8  -8   5 2990.18 194.609   1
  -8   8  -5 2503.71 200.324   3
   8  -8   6 13560.5 431.087   1
  -8   8  -6 12333.1 465.929   3
  -8   8  -7 10281.2 426.454   3
   8  -8   7 10365.1 376.745   1
  -8   8  -8 1265.26 153.476   3
  -8   8  -9 1248.86 162.409   3
  -8   8 -10 1948.89 198.479   3
  -8   8 -11 226.394 93.3680   3
  -8   8 -12 2603.25 239.357   3
  -8   8 -13 1844.43 214.385   3
  -8   8 -14 534.999 131.525   3
  -8   8 -15 1418.76 199.000   3
  -8   8 -16 408.107 127.826   3
   8  -7 -14 1055.97 184.570   1
   8  -7 -13 98.3358 85.7723   1
   8  -7 -12 773.393 153.587   1
   8  -7 -11 398.597 118.729   1
   8  -7 -10 1914.52 215.820   1
   8  -7  -9-23.3481 70.5921   1
   8  -7  -8 5862.23 357.628   1
   8  -7  -7 12948.0 527.594   1
   8  -7  -6 1608.14 181.278   1
   8  -7  -5 1765.84 182.828   1
   8  -7  -4 8918.50 399.814   1
   8  -7  -3 4494.00 274.852   1
   8  -7  -3 4926.26 180.886   2
   8  -7  -2 1207.55 144.370   1
  -8   7   2 838.102 76.1040   4
   8  -7  -2 1061.03 79.2390   2
  -8   7   1 8052.16 273.441   4
   8  -7  -1 8143.23 359.008   1
   8  -7  -1 8872.62 248.152   2
   8  -7   0 10288.4 394.292   1
   8  -7   1 195.446 67.7554   1
   8  -7   2 1267.91 129.650   1
   8  -7   3 434.962 77.2318   1
  -8   7  -4 1452.07 151.129   3
   8  -7   4 1832.99 146.019   1
   8  -7   5 4660.36 225.963   1
  -8   7  -5 4429.66 265.135   3
   8  -7   6 987.423 105.400   1
  -8   7  -6 866.990 122.349   3
  -8   7  -7 3557.10 247.305   3
   8  -7   7 3256.57 190.888   1
  -8   7  -8 8948.91 403.620   3
  -8   7  -9 12921.9 498.902   3
  -8   7 -10 639.945 113.262   3
  -8   7 -11 1155.30 155.894   3
  -8   7 -12 4.17480 74.4855   3
  -8   7 -13 156.878 99.3177   3
  -8   7 -14 4719.44 341.082   3
  -8   7 -15 7078.81 428.258   3
  -8   7 -16 1104.56 185.019   3
   8  -6 -15 2671.44 286.484   1
   8  -6 -14 4065.87 335.150   1
   8  -6 -13 1167.12 178.804   1
   8  -6 -12 478.120 140.130   1
   8  -6 -11 1790.96 216.249   1
   8  -6 -10 2936.09 256.358   1
   8  -6  -9 45.2438 80.1298   1
   8  -6  -8 3010.33 246.317   1
   8  -6  -7 8141.60 400.271   1
   8  -6  -6 316.931 94.1664   1
   8  -6  -5 7043.85 354.024   1
   8  -6  -4 1945.44 180.974   1
  -8   6   4 1803.80 99.3046   4
   8  -6  -3 472.188 96.1565   1
  -8   6   3 447.620 57.1070   4
   8  -6  -3 475.533 44.5951   2
   8  -6  -2 248.897 33.5107   2
   8  -6  -2 115.937 58.5109   1
  -8   6   2 247.128 47.7112   4
   8  -6  -1 854.130 113.836   1
  -8   6   1 816.831 84.3961   4
   8  -6   0 888.316 115.162   1
   8  -6   1 19908.7 539.188   1
   8  -6   2 22780.7 571.784   1
  -8   6  -3 7881.60 346.856   3
   8  -6   3 8905.21 315.771   1
   8  -6   4 69.2690 40.4429   1
  -8   6  -4 4.59761 56.6881   3
  -8   6  -4 10.8427 30.2760   2
   8  -6   5 975.689 93.8249   1
  -8   6  -5 933.741 129.697   3
  -8   6  -6 623.110 107.025   3
   8  -6   6 517.436 70.6852   1
  -8   6  -7 4027.61 262.986   3
  -8   6  -8 22333.4 673.170   3
  -8   6  -9 6666.24 352.482   3
  -8   6 -10 1232.72 160.905   3
  -8   6 -11 3665.81 278.349   3
  -8   6 -12 5547.06 350.302   3
  -8   6 -13 1487.27 229.367   3
  -8   6 -14 238.105 107.367   3
  -8   6 -15 1692.84 220.438   3
  -8   6 -16 195.139 91.2978   3
   8  -5 -15 2179.33 257.234   1
   8  -5 -14 1517.14 209.309   1
   8  -5 -13 367.520 124.254   1
   8  -5 -12 4998.09 350.865   1
   8  -5 -11 5941.72 369.095   1
   8  -5 -10 13.1125 69.4129   1
   8  -5  -9 479.042 114.231   1
   8  -5  -8 2171.94 206.705   1
   8  -5  -7 631.810 119.024   1
   8  -5  -6 17613.0 584.136   1
   8  -5  -5 24914.6 696.151   1
  -8   5   5 24772.1 487.956   4
   8  -5  -4 15161.3 512.388   1
  -8   5   4 15577.5 370.352   4
   8  -5  -4 16045.9 283.338   2
  -8   5   3 961.056 85.9633   4
   8  -5  -3 1019.44 126.615   1
   8  -5  -2 6654.06 304.998   1
  -8   5   2 6563.87 243.042   4
   8  -5  -1-34.0124 49.0777   1
   8  -5   0 3570.93 205.180   1
   8  -5   1 23960.1 581.368   1
   8  -5   2 2299.81 152.552   1
  -8   5  -3 1902.26 167.688   3
   8  -5   3 1846.13 129.843   1
  -8   5  -3 1837.76 98.1709   2
  -8   5  -4 15663.5 409.496   1
  -8   5  -4 17590.4 533.837   3
  -8   5  -4 15671.4 370.514   2
   8  -5   4 18074.1 423.547   1
  -8   5  -5 17575.0 428.085   1
  -8   5  -5 19155.6 579.529   3
  -8   5  -5 18912.3 437.109   2
   8  -5   5 20476.3 442.653   1
  -8   5  -6 588.190 108.312   3
   8  -5   6 516.500 64.1643   1
  -8   5  -7 37.4653 58.5984   3
  -8   5  -8 352.668 94.1131   3
  -8   5  -9 2469.64 216.397   3
  -8   5 -10 18313.3 629.570   3
  -8   5 -11 20017.9 680.427   3
  -8   5 -12 4194.21 309.686   3
  -8   5 -13 595.984 139.546   3
  -8   5 -14 121.448 109.117   3
  -8   5 -15 91.6875 90.3930   3
   8  -4 -15-48.1356 85.3003   1
   8  -4 -14 57.8872 91.3891   1
   8  -4 -13 2232.52 246.641   1
   8  -4 -12 10923.8 519.413   1
   8  -4 -11 5396.76 351.074   1
   8  -4 -10 1711.45 196.396   1
   8  -4  -9 2979.08 248.857   1
   8  -4  -9 3094.82 158.707   4
   8  -4  -8 602.807 74.9803   4
   8  -4  -8 642.104 118.361   1
   8  -4  -7 163.261 46.4221   4
   8  -4  -7 77.6855 65.2502   1
   8  -4  -6 1092.91 95.4743   4
  -8   4   6 900.221 82.6804   4
   8  -4  -6 1065.92 145.340   1
   8  -4  -5 2521.99 202.077   1
  -8   4   5 2220.37 128.669   4
   8  -4  -4 6456.64 314.273   1
  -8   4   4 6590.60 238.071   4
   8  -4  -3 33424.5 788.381   1
   8  -4  -2 22232.4 592.077   1
   8  -4  -1 7863.07 312.451   1
   8  -4   0 1005.02 111.283   1
   8  -4   1 382.566 82.3801   1
  -8   4  -2 1491.19 145.511   3
   8  -4   2 1918.88 129.423   1
  -8   4  -3 24531.6 643.567   3
   8  -4   3 25447.0 525.625   1
  -8   4  -3 22886.1 429.978   2
  -8   4  -4 51894.8 1067.38   3
   8  -4   4 53983.9 873.294   1
  -8   4  -4 48999.9 835.159   2
  -8   4  -5 17440.2 556.585   3
   8  -4   5 18021.8 374.715   1
   8  -4   6 1084.83 71.7491   1
  -8   4  -6 1348.12 150.711   3
  -8   4  -7 322.857 81.9520   3
  -8   4  -8 72.7945 70.0393   3
  -8   4  -9 533.493 113.822   3
  -8   4 -10 572.408 114.989   3
  -8   4 -11 10083.6 470.668   3
  -8   4 -12 3386.89 279.314   3
  -8   4 -13 38.9676 76.7379   3
  -8   4 -14 2108.69 241.766   3
  -8   4 -15 5889.05 414.713   3
   8  -3 -15 1291.54 200.091   1
   8  -3 -14 364.177 118.547   1
   8  -3 -13 4.29208 86.3182   1
   8  -3 -12 270.712 96.8941   1
   8  -3 -11 6438.69 386.273   1
   8  -3 -10 22781.5 734.853   1
   8  -3 -10 22821.7 559.734   4
   8  -3  -9 28089.2 814.969   1
   8  -3  -9 28536.9 641.846   4
   8  -3  -8 8638.79 411.685   1
   8  -3  -8 9140.73 321.205   4
   8  -3  -7 395.192 92.3251   1
   8  -3  -7 378.931 68.6814   4
   8  -3  -6 2463.86 203.614   1
   8  -3  -6 2396.96 156.708   4
   8  -3  -5 1020.45 105.922   4
   8  -3  -5 1147.92 138.048   1
   8  -3  -4 12813.0 453.886   1
   8  -3  -4 13426.6 407.036   4
   8  -3  -3 42657.5 915.232   1
   8  -3  -2 17684.9 511.041   1
   8  -3  -1 6565.74 277.514   1
  -8   3   0 593.492 88.5214   3
   8  -3   0 797.733 97.7099   1
  -8   3  -1 250.367 69.5883   3
   8  -3   1 315.888 61.9001   1
  -8   3  -2 8007.72 335.973   3
   8  -3   2 8648.93 274.312   1
  -8   3  -2 7828.86 161.260   2
   8  -3   3 607.509 65.1108   1
  -8   3  -3 587.661 99.5925   3
  -8   3  -4 6017.77 304.810   3
   8  -3   4 6132.74 188.469   1
  -8   3  -5 3225.30 222.023   3
   8  -3   5 3258.43 109.450   1
  -8   3  -6 807.901 118.181   3
  -8   3  -7 3821.56 257.652   3
  -8   3  -8 16217.5 571.665   3
  -8   3  -9 22282.5 700.339   3
  -8   3 -10 7198.19 386.983   3
  -8   3 -11 308.486 94.2312   3
  -8   3 -12 54.2328 73.9842   3
  -8   3 -13-126.216 108.775   3
  -8   3 -14 645.647 156.417   3
  -8   3 -15 2435.39 279.223   3
   8  -2 -15 4361.76 354.944   1
   8  -2 -14 148.452 121.153   1
   8  -2 -13 293.349 117.042   1
   8  -2 -12 59.5005 88.9981   1
   8  -2 -11 1837.66 155.007   4
   8  -2 -11 1564.51 190.130   1
   8  -2 -10 11286.2 497.282   1
   8  -2 -10 11271.4 395.415   4
   8  -2  -9 14118.3 544.077   1
   8  -2  -9 14245.6 447.801   4
   8  -2  -8 2131.63 205.241   1
   8  -2  -8 2287.96 169.212   4
   8  -2  -7 48.5613 70.1407   1
   8  -2  -7 49.0431 55.5618   4
   8  -2  -6 3496.93 242.221   1
   8  -2  -6 3726.97 213.822   4
   8  -2  -5 15516.5 514.834   1
   8  -2  -5 15849.0 470.674   4
   8  -2  -4 12773.8 444.383   1
   8  -2  -4 12439.5 410.344   4
   8  -2  -3 84.9767 52.6603   1
   8  -2  -3 44.2887 50.4454   4
   8  -2  -2 3914.55 223.012   1
   8  -2  -2 3932.21 227.919   4
   8  -2  -1 1028.90 110.112   1
  -8   2   1 887.696 105.099   3
   8  -2   0 55.2145 54.1129   1
  -8   2   0 107.930 56.2487   3
   8  -2   1 27558.6 589.692   1
  -8   2  -1 27044.7 669.912   3
  -8   2  -2 37076.6 841.100   3
   8  -2   2 38326.0 708.886   1
  -8   2  -3 15118.1 489.130   3
   8  -2   3 15630.5 355.692   1
  -8   2  -4 5070.34 278.798   3
   8  -2   4 5319.04 158.702   1
  -8   2  -5-82.2111 80.6972   3
  -8   2  -6 1621.82 165.619   3
  -8   2  -7 3136.20 236.986   3
  -8   2  -8 3851.59 271.948   3
  -8   2  -9 5746.44 338.483   3
  -8   2 -10 126.047 79.9540   3
  -8   2 -11 91.3297 86.9936   3
  -8   2 -12 910.332 170.740   3
  -8   2 -13 5731.96 390.362   3
  -8   2 -14 8812.05 507.083   3
   8  -1 -15 415.018 123.244   1
   8  -1 -14 93.6271 94.6212   1
   8  -1 -13 948.668 169.455   1
   8  -1 -12 7016.49 412.845   1
   8  -1 -12 6743.37 331.063   4
   8  -1 -11 13442.6 562.449   1
   8  -1 -11 13851.8 477.188   4
   8  -1 -10 2775.27 244.374   1
   8  -1 -10 2824.94 202.402   4
   8  -1  -9 126.031 72.7850   1
   8  -1  -9 151.587 64.1121   4
   8  -1  -8 1082.69 152.381   1
   8  -1  -8 1213.58 135.647   4
   8  -1  -7 678.131 123.541   1
   8  -1  -7 662.843 101.967   4
   8  -1  -6 4851.74 285.284   1
   8  -1  -6 4818.45 259.887   4
   8  -1  -5 18138.5 569.487   1
   8  -1  -5 18388.3 540.509   4
   8  -1  -4 25576.3 677.075   1
   8  -1  -4 25696.1 663.458   4
   8  -1  -3 6803.26 303.461   1
  -8   1   3 6615.08 277.185   3
   8  -1  -3 6858.48 314.349   4
   8  -1  -2 58.4679 43.0417   1
   8  -1  -2 78.1499 54.7316   4
  -8   1   2 55.4901 39.3248   3
   8  -1  -1 5679.16 257.346   1
  -8   1   1 5309.10 254.012   3
   8  -1  -1 5810.69 295.321   4
   8  -1   0 8397.99 298.790   1
  -8   1   0 8078.59 322.664   3
   8  -1   0 7975.62 352.257   4
   8  -1   1 1428.66 113.992   1
  -8   1  -1 1522.31 146.732   3
   8  -1   2 502.518 63.8826   1
  -8   1  -2 452.668 85.9572   3
   8  -1   3 755.386 67.5511   1
  -8   1  -3 680.609 105.999   3
  -8   1  -4 1685.59 160.568   3
   8  -1   4 1718.18 81.2289   1
  -8   1  -5 35.1901 57.3602   3
  -8   1  -6 9815.93 418.222   3
  -8   1  -7 28914.3 792.891   3
  -8   1  -8 15887.4 572.417   3
  -8   1  -9 4169.23 297.388   3
  -8   1 -10 1288.74 175.910   3
  -8   1 -11 257.474 90.2585   3
  -8   1 -12 152.071 86.2148   3
  -8   1 -13 10253.9 542.195   3
  -8   1 -14 12952.5 630.162   3
   8   0 -15 351.166 129.815   1
   8   0 -14 1349.53 207.169   1
   8   0 -13-73.8365 65.3833   4
   8   0 -12 4348.01 277.058   4
   8   0 -11 4376.06 274.843   4
   8   0 -10 1081.41 139.682   4
   8   0  -9 489.011 98.7258   4
   8   0  -8 1109.36 143.970   4
   8   0  -7 11632.2 435.867   4
   8   0  -6 10125.3 405.763   4
   8   0  -5 696.211 113.276   4
  -8   0   5 673.660 86.4009   3
   8   0  -4 239.594 76.0879   4
  -8   0   4 209.442 54.4753   3
  -8   0   3 4057.22 210.178   3
   8   0  -3 4076.36 253.506   4
   8   0  -2 39.4942 60.3015   4
  -8   0   2 4.82346 39.5405   3
  -8   0   1 10064.0 358.253   3
   8   0  -1 10061.4 412.615   4
  -8   0   0 31475.6 731.637   3
   8   0   0 31994.9 818.704   4
  -8   0   0 32670.1 530.689   2
   8   0   1 34736.5 704.371   1
  -8   0  -1 33945.1 777.394   3
   8   0   1 33845.8 854.104   4
   8   0   2 5837.23 221.580   1
  -8   0  -2 5664.33 282.136   3
   8   0   3 1068.24 83.1743   1
  -8   0  -3 739.215 110.044   3
  -8   0  -4 1428.36 153.836   3
   8   0   4 1446.26 78.4009   1
  -8   0  -5 32.4728 60.9966   3
  -8   0  -6 10642.0 441.322   3
  -8   0  -7 16282.0 580.362   3
  -8   0  -8 2391.58 222.337   3
  -8   0  -9 524.259 115.466   3
  -8   0 -10 2995.94 266.675   3
  -8   0 -11 86.0688 86.5094   3
  -8   0 -12 46.9405 96.5797   3
  -8   0 -13 1619.26 227.980   3
   8   1 -14 5123.17 332.924   4
   8   1 -13 7576.92 395.664   4
   8   1 -12 2401.07 219.791   4
   8   1 -11 383.391 101.079   4
   8   1 -10 1427.32 159.410   4
   8   1  -9 1041.72 145.291   4
  -8  -1   8 2722.28 156.587   3
   8   1  -8 2580.07 213.607   4
  -8  -1   7 20797.6 496.247   3
   8   1  -7 20590.0 635.823   4
  -8  -1   6 26180.8 581.916   3
   8   1  -6 25819.4 721.917   4
  -8  -1   5 3880.61 193.364   3
   8   1  -5 4018.51 262.390   4
  -8  -1   4 141.344 47.4623   3
   8   1  -4 128.285 69.7876   4
  -8  -1   3 71.8066 45.1733   3
   8   1  -3 54.2482 62.2213   4
  -8  -1   2 66.6673 46.8115   3
   8   1  -2 13.9011 54.6605   4
  -8  -1   1 2696.24 179.910   3
   8   1  -1 2758.28 219.722   4
  -8  -1   1 2856.04 124.157   2
  -8  -1   0 14290.9 449.373   3
   8   1   0 14385.8 525.270   4
  -8  -1   0 14557.0 333.532   2
  -8  -1  -1 1444.12 141.010   3
   8   1   1 1375.72 168.647   4
  -8  -1  -2 6274.52 300.311   3
   8   1   2 5838.47 333.426   4
  -8  -1  -3 11055.8 422.251   3
  -8  -1  -4 3971.34 252.527   3
  -8  -1  -5 1487.66 162.238   3
  -8  -1  -6 1632.97 178.780   3
  -8  -1  -7 547.175 121.283   3
  -8  -1  -8 2397.25 235.355   3
  -8  -1  -9 22365.7 761.941   3
  -8  -1 -10 12020.1 559.791   3
  -8  -1 -11 264.361 111.955   3
  -8  -1 -12-2.78280 90.2658   3
  -8  -1 -13 107.201 108.211   3
   8   2 -15 621.004 146.604   4
   8   2 -14 4738.16 333.763   4
   8   2 -13 6602.92 386.295   4
   8   2 -12 1456.94 184.689   4
   8   2 -11 1139.79 159.134   4
   8   2 -10 1097.55 153.845   4
   8   2  -9 23.3274 63.2475   4
   8   2  -8 1770.79 188.894   4
   8   2  -7 7863.61 390.096   4
  -8  -2   6 421.323 63.2605   3
   8   2  -6 454.107 104.780   4
  -8  -2   5 5804.54 234.799   3
   8   2  -5 5400.66 317.787   4
  -8  -2   4 19323.7 486.956   3
   8   2  -4 19214.0 628.042   4
  -8  -2   3 17140.2 467.938   3
   8   2  -3 17478.4 596.659   4
  -8  -2   2 1302.71 122.428   3
   8   2  -2 1115.31 150.802   4
  -8  -2   2 1314.83 98.6696   2
  -8  -2   1 401.488 57.7501   2
  -8  -2   1 385.118 73.4480   3
   8   2  -1 346.342 91.1351   4
  -8  -2   0 107.269 57.2489   3
   8   2   0 29.8576 60.8095   4
  -8  -2   0 189.096 45.5506   2
  -8  -2  -1 3159.37 208.564   3
   8   2   1 3226.64 251.283   4
  -8  -2  -2 17482.3 541.132   3
   8   2   2 17812.3 626.495   4
  -8  -2  -3 17659.8 561.693   3
  -8  -2  -4 2880.56 222.741   3
  -8  -2  -5 867.510 137.021   3
  -8  -2  -6 1423.35 176.377   3
  -8  -2  -7-56.7698 95.6233   3
  -8  -2  -8 870.039 146.269   3
  -8  -2  -9 852.823 160.686   3
  -8  -2 -10 276.601 118.215   3
  -8  -2 -11 579.913 152.163   3
  -8  -2 -12 3996.25 354.012   3
   8   3 -15 641.020 152.322   4
   8   3 -14 1217.48 187.276   4
   8   3 -13 378.820 113.257   4
   8   3 -12 2751.87 259.809   4
   8   3 -11 9639.44 479.708   4
   8   3 -10 7332.08 409.370   4
   8   3  -9 1469.67 184.375   4
   8   3  -8 88.4484 71.5136   4
   8   3  -7 290.895 95.8502   4
   8   3  -6 45.3691 60.1662   4
   8   3  -5 7634.06 399.039   4
  -8  -3   4 16985.8 448.825   3
   8   3  -4 17689.0 619.183   4
  -8  -3   3 653.029 86.1572   3
   8   3  -3 711.713 129.727   4
  -8  -3   2 1908.86 148.064   3
   8   3  -2 1848.97 200.440   4
  -8  -3   2 2010.30 137.402   2
  -8  -3   1 1022.50 116.584   3
   8   3  -1 1051.11 152.806   4
  -8  -3   1 1057.61 101.378   2
  -8  -3   0 69.4605 57.4921   3
   8   3   0 173.522 94.2465   4
  -8  -3   0 21.7161 43.9378   2
  -8  -3  -1 936.943 120.572   3
   8   3   1 1056.22 160.919   4
  -8  -3  -2-33.3397 48.2196   3
   8   3   2 185.734 93.4749   4
  -8  -3  -3 209.028 90.5254   3
   8   3   3 182.265 79.6134   4
  -8  -3  -4 2454.61 217.076   3
  -8  -3  -5 11109.7 482.891   3
  -8  -3  -6 2607.16 244.705   3
  -8  -3  -7 892.681 152.410   3
  -8  -3  -8 484.392 130.742   3
  -8  -3  -9 147.006 94.1262   3
  -8  -3 -10 151.689 99.9185   3
  -8  -3 -11 2317.75 303.681   3
   8   4 -14 44.3071 80.1610   4
   8   4 -13 223.051 108.532   4
   8   4 -12 828.993 158.643   4
   8   4 -11 1368.69 189.823   4
   8   4 -10 29.4640 70.4306   4
   8   4  -9 1774.89 207.313   4
   8   4  -8 3618.65 288.011   4
   8   4  -7 145.934 82.1269   4
   8   4  -6 3495.62 282.852   4
   8   4  -5 1375.82 179.536   4
   8   4  -4 455.496 116.461   4
   8   4  -3 4205.40 307.121   4
  -8  -4   3 4434.03 224.798   2
   8   4  -2 12629.3 541.500   4
  -8  -4   2 12630.5 397.610   2
  -8  -4   1 7860.65 332.305   3
   8   4  -1 7531.44 408.538   4
  -8  -4   1 7238.11 294.855   2
  -8  -4   0 12.0080 50.4258   3
   8   4   0 23.9304 70.2192   4
  -8  -4   0 87.1194 52.4316   2
  -8  -4  -1 1943.93 179.964   3
   8   4   1 1991.82 218.435   4
  -8  -4  -1 2037.01 158.448   2
  -8  -4  -2 188.050 76.7323   3
   8   4   2 115.635 100.641   4
  -8  -4  -3-15.1939 66.2223   3
   8   4   3 53.5142 75.2073   4
  -8  -4  -4 2502.71 230.223   3
  -8  -4  -5 3104.32 262.881   3
  -8  -4  -6 1962.96 217.989   3
  -8  -4  -7 87.4701 85.8875   3
  -8  -4  -8 62.9216 99.4962   3
  -8  -4  -9 6682.48 442.092   3
  -8  -4 -10 7257.34 468.557   3
   8   5 -11 458.390 113.692   4
   8   5 -10 1815.13 226.042   4
   8   5  -9 8069.20 457.133   4
   8   5  -8 8405.18 463.445   4
   8   5  -7 77.8467 78.7521   4
   8   5  -6 254.821 83.3668   4
   8   5  -5-104.835 105.480   4
   8   5  -4 38.4210 82.7084   4
  -8  -5   3 296.350 72.1253   2
   8   5  -3 232.165 92.5005   4
   8   5  -2 1371.76 185.924   4
  -8  -5   2 1558.08 147.775   2
   8   5  -1 3738.45 302.916   4
  -8  -5   1 3303.67 211.339   2
   8   5   0 858.602 156.145   4
  -8  -5   0 517.135 88.6594   2
  -8  -5  -1 823.957 128.590   3
   8   5   1 944.733 157.898   4
  -8  -5  -1 916.460 119.630   2
  -8  -5  -2 8285.01 401.094   3
   8   5   2 8986.44 477.655   4
  -8  -5  -3 12889.2 525.542   3
   8   5   3 12289.2 576.657   4
  -8  -5  -4 4451.09 315.520   3
   8   5   4 4262.36 335.782   4
  -8  -5  -5 224.526 105.604   3
  -8  -5  -6 397.402 127.905   3
  -8  -5  -7-7.72580 84.0620   3
  -8  -5  -8 960.586 180.323   3
  -8  -5  -9 4490.28 360.401   3
   8   6  -8 889.520 169.930   4
   8   6  -7 66.5390 71.6222   4
   8   6  -6 198.131 92.5351   4
   8   6  -5 4604.14 353.062   4
   8   6  -4 17199.6 687.746   4
   8   6  -3 14290.5 624.527   4
   8   6  -2 1309.19 193.919   4
   8   6  -1-69.7322 68.2045   4
   8   6   0 214.928 98.7310   4
  -8  -6   0 329.893 87.4787   2
   8   6   1 96.5324 98.3350   4
  -8  -6  -1 118.662 72.8737   2
   8   6   2 505.559 139.684   4
   8   6   3 5476.55 394.014   4
  -8  -6  -4 5463.31 347.670   3
   8   6   4 5344.79 386.009   4
  -8  -6  -5 102.224 76.1085   3
  -8  -6  -6 712.656 149.999   3
  -8  -6  -7 6239.61 408.747   3
  -8  -6  -8 7032.17 444.671   3
   8   7  -3 1536.14 216.884   4
   8   7  -2 212.894 118.131   4
   8   7  -1 854.973 175.968   4
   8   7   0 7683.27 467.548   4
   8   7   1 14045.4 645.630   4
   9 -14   1 199.333 88.2328   1
   9 -14   2 764.983 163.641   1
   9 -14   3 914.666 163.251   1
   9 -14   4 127.905 95.4852   1
   9 -14   5 3026.10 295.936   1
   9 -14   6 1282.04 195.101   1
  -9  14  -6 974.387 150.013   3
   9 -13  -4 3118.90 299.239   1
   9 -13  -3 204.504 110.085   1
   9 -13  -2 2101.11 244.006   1
   9 -13  -1 1404.53 158.490   2
   9 -13  -1 1524.44 209.668   1
   9 -13   0 856.847 124.235   2
   9 -13   0 1052.07 176.290   1
   9 -13   1 1432.32 196.435   1
   9 -13   2 8531.94 470.034   1
   9 -13   3 22926.5 800.262   1
   9 -13   4 12891.1 578.826   1
   9 -13   5 2564.21 254.216   1
   9 -13   6 7.54875 79.9337   1
  -9  13  -6-20.7981 52.9907   3
  -9  13  -7 688.846 131.207   3
  -9  13  -7 716.497 130.584   4
  -9  13  -8 6125.63 363.610   3
  -9  13  -8 6190.76 374.340   4
  -9  13  -9 22697.0 778.329   4
   9 -12  -7 70.9266 77.7418   1
   9 -12  -6 2446.61 269.502   1
   9 -12  -5 15306.2 664.878   1
   9 -12  -4 34026.9 1028.60   1
   9 -12  -3 31296.6 966.005   1
   9 -12  -2 9248.79 485.681   1
   9 -12  -2 8784.92 375.009   2
   9 -12  -1 857.571 118.162   2
   9 -12  -1 831.471 150.090   1
   9 -12   0 4.11156 60.7116   2
   9 -12   0 56.9050 77.9225   1
   9 -12   1 6016.23 377.816   1
   9 -12   2 41255.0 1083.68   1
   9 -12   3 61748.3 1394.58   1
   9 -12   4 29183.2 869.843   1
   9 -12   5 7883.51 421.940   1
  -9  12  -5 7863.28 377.512   4
  -9  12  -6 243.839 72.6148   3
   9 -12   6 399.151 113.709   1
  -9  12  -6 537.658 108.913   4
   9 -12   7 235.648 88.6716   1
  -9  12  -7 277.043 81.3902   3
  -9  12  -7 313.904 89.8501   4
  -9  12  -8 2567.58 231.632   3
  -9  12  -8 2596.76 238.022   4
  -9  12  -9 14786.1 589.771   3
  -9  12  -9 15035.6 611.199   4
  -9  12 -10 16212.3 625.560   3
  -9  12 -10 15981.6 650.961   4
   9 -11  -9 15327.2 683.394   1
   9 -11  -8 1582.59 220.406   1
   9 -11  -7-48.2770 93.4023   1
   9 -11  -6 3534.01 312.846   1
   9 -11  -5 24771.9 838.793   1
   9 -11  -4 39688.7 1094.85   1
   9 -11  -3 35957.7 1018.97   1
   9 -11  -3 36321.9 823.643   2
   9 -11  -2 9844.74 485.678   1
   9 -11  -2 9913.27 372.763   2
   9 -11  -1 100.919 41.4828   2
   9 -11  -1 148.047 88.7626   1
   9 -11   0-51.8694 64.0745   2
   9 -11   0 24.7948 75.6290   1
   9 -11   1 2606.83 235.731   1
   9 -11   2 10822.5 482.888   1
   9 -11   3 14518.0 560.257   1
  -9  11  -3 14589.9 478.730   4
   9 -11   4 6002.70 346.438   1
  -9  11  -4 5844.52 303.155   4
   9 -11   5 348.897 97.4057   1
  -9  11  -5 153.322 65.9252   3
  -9  11  -5 321.614 90.8765   4
   9 -11   6 2236.87 210.774   1
  -9  11  -6 2012.59 202.115   3
  -9  11  -6 2435.16 216.799   4
  -9  11  -7-34.9898 76.6767   3
   9 -11   7 10.9311 54.0697   1
  -9  11  -8 65.9469 65.7637   3
  -9  11  -9 522.175 118.095   3
  -9  11 -10 167.374 88.5154   3
  -9  11 -11 163.452 77.4573   3
  -9  11 -11 231.848 89.9677   4
  -9  11 -12 1829.47 210.603   3
   9 -10 -10 17047.1 718.228   1
   9 -10  -9 5479.58 396.749   1
   9 -10  -8 62.7927 80.0223   1
   9 -10  -7 1797.10 223.243   1
   9 -10  -6 1500.68 201.056   1
   9 -10  -5 2328.78 240.446   1
   9 -10  -4 7341.65 412.661   1
   9 -10  -3 1851.12 208.412   1
   9 -10  -3 1801.20 142.226   2
   9 -10  -2 3027.65 257.820   1
   9 -10  -2 2746.43 172.193   2
   9 -10  -1 5256.62 332.987   1
   9 -10  -1 5581.84 250.972   2
   9 -10   0 2005.93 203.314   1
   9 -10   1 45.2982 58.0085   1
   9 -10   2 551.658 109.341   1
   9 -10   3-50.7609 69.7379   1
   9 -10   4 128.454 63.5322   1
   9 -10   5 3152.92 236.002   1
  -9  10  -5 3204.92 247.021   3
   9 -10   6 4570.81 282.431   1
  -9  10  -6 4386.20 289.736   3
   9 -10   7 294.406 85.8888   1
  -9  10  -7 219.097 82.6700   3
  -9  10  -8 59.2312 70.1423   3
  -9  10  -9 958.460 150.746   3
  -9  10 -10 3425.59 276.313   3
  -9  10 -11 1197.99 174.366   3
  -9  10 -12 591.193 126.106   3
  -9  10 -13 556.718 132.118   3
  -9  10 -14-76.6592 79.1793   3
   9  -9 -11 613.381 141.456   1
   9  -9 -10 242.145 108.518   1
   9  -9  -9 1538.69 208.153   1
   9  -9  -8 6669.56 410.659   1
   9  -9  -7 3039.39 273.871   1
   9  -9  -6 152.240 94.7337   1
   9  -9  -5 109.153 82.6270   1
   9  -9  -4 900.254 150.978   1
   9  -9  -3 209.562 50.5085   2
   9  -9  -3 305.332 99.8664   1
   9  -9  -2 1664.17 185.765   1
   9  -9  -2 1603.68 119.998   2
   9  -9  -1 4424.12 294.398   1
   9  -9  -1 4836.31 209.970   2
   9  -9   0 576.486 112.759   1
   9  -9   1 558.984 113.734   1
   9  -9   2 930.121 124.971   1
   9  -9   3 13229.6 479.350   1
   9  -9   4 9100.28 382.183   1
   9  -9   5 67.8544 46.0327   1
  -9   9  -5 4.83125 56.5813   3
  -9   9  -6 52.6021 65.3847   3
   9  -9   6 21.5578 43.0950   1
   9  -9   7 140.268 60.7073   1
  -9   9  -7 144.156 75.6437   3
  -9   9  -8 413.765 100.585   3
[truncated: 58,379 more chars]
