# Supplementary material for: Cyanide Complexes Based on {Mo6I8}4+ and {W6I8}4+ Cluster Cores
Source: MDPI journal article supplement (doi:10.3390/molecules25245796), 2020-12-08
Supplement: s1 [file s1 › Compound 4.cif]

 
data_pr780

_audit_creation_method           SHELXL-2018/3
_shelx_SHELXL_version_number     2018/3
_chemical_name_systematic        ?
_chemical_name_common            ?
_chemical_melting_point          ?
_chemical_formula_moiety         ?
_chemical_formula_sum            'C38 H78 I8 Mo6 N6 O2'
_chemical_formula_weight         2241.90

loop_
_atom_type_symbol
_atom_type_description
_atom_type_scat_dispersion_real
_atom_type_scat_dispersion_imag
_atom_type_scat_source
C C 0.0033 0.0016 'International Tables Vol C Tables 4.2.6.8 and 6.1.1.4'
H H 0.0000 0.0000 'International Tables Vol C Tables 4.2.6.8 and 6.1.1.4'
N N 0.0061 0.0033 'International Tables Vol C Tables 4.2.6.8 and 6.1.1.4'
I I -0.4742 1.8119 'International Tables Vol C Tables 4.2.6.8 and 6.1.1.4'
Mo Mo -1.6832 0.6857 'International Tables Vol C Tables 4.2.6.8 and 6.1.1.4'
O O 0.0106 0.0060 'International Tables Vol C Tables 4.2.6.8 and 6.1.1.4'

_space_group_crystal_system      tetragonal
_space_group_IT_number           139
_space_group_name_H-M_alt        'I 4/m m m'
_space_group_name_Hall           '-I 4 2'

_shelx_space_group_comment       
;
The symmetry employed for this shelxl refinement is uniquely defined
by the following loop, which should always be used as a source of
symmetry information in preference to the above space-group names.
They are only intended as comments.
;

loop_
_space_group_symop_operation_xyz
'x, y, z'
'-x, -y, z'
'-y, x, z'
'y, -x, z'
'-x, y, -z'
'x, -y, -z'
'y, x, -z'
'-y, -x, -z'
'x+1/2, y+1/2, z+1/2'
'-x+1/2, -y+1/2, z+1/2'
'-y+1/2, x+1/2, z+1/2'
'y+1/2, -x+1/2, z+1/2'
'-x+1/2, y+1/2, -z+1/2'
'x+1/2, -y+1/2, -z+1/2'
'y+1/2, x+1/2, -z+1/2'
'-y+1/2, -x+1/2, -z+1/2'
'-x, -y, -z'
'x, y, -z'
'y, -x, -z'
'-y, x, -z'
'x, -y, z'
'-x, y, z'
'-y, -x, z'
'y, x, z'
'-x+1/2, -y+1/2, -z+1/2'
'x+1/2, y+1/2, -z+1/2'
'y+1/2, -x+1/2, -z+1/2'
'-y+1/2, x+1/2, -z+1/2'
'x+1/2, -y+1/2, z+1/2'
'-x+1/2, y+1/2, z+1/2'
'-y+1/2, -x+1/2, z+1/2'
'y+1/2, x+1/2, z+1/2'

_cell_length_a                   14.6656(3)
_cell_length_b                   14.6656(3)
_cell_length_c                   14.5746(4)
_cell_angle_alpha                90
_cell_angle_beta                 90
_cell_angle_gamma                90
_cell_volume                     3134.70(15)
_cell_formula_units_Z            2
_cell_measurement_temperature    150(2)
_cell_measurement_reflns_used    5527
_cell_measurement_theta_min      2.78
_cell_measurement_theta_max      29.11

_exptl_crystal_description       block
_exptl_crystal_colour            orange
_exptl_crystal_density_meas      ?
_exptl_crystal_density_method    ?
_exptl_crystal_density_diffrn    2.375
_exptl_crystal_F_000             2080
_exptl_transmission_factor_min   ?
_exptl_transmission_factor_max   ?
_exptl_crystal_size_max          0.16
_exptl_crystal_size_mid          0.15
_exptl_crystal_size_min          0.08
_exptl_absorpt_coefficient_mu    5.137
_shelx_estimated_absorpt_T_min   0.494
_shelx_estimated_absorpt_T_max   0.684
_exptl_absorpt_correction_type   multi-scan
_exptl_absorpt_correction_T_min  0.82380
_exptl_absorpt_correction_T_max  1.00000
_exptl_absorpt_process_details   
;
CrysAlisPro 1.171.39.46 (Rigaku Oxford Diffraction, 2018)
Empirical absorption correction using spherical harmonics,
implemented in SCALE3 ABSPACK scaling algorithm.
;
_exptl_absorpt_special_details   ?

_diffrn_radiation_probe          x-ray
_diffrn_radiation_source         'fine-focus sealed tube'
_diffrn_radiation_monochromator  graphite
_diffrn_measurement_device       'four-circle diffractometer'
_diffrn_detector                 'CCD plate'
_diffrn_detector_type            AtlasS2
_diffrn_ambient_temperature      150(2)
_diffrn_radiation_wavelength     0.71073
_diffrn_radiation_type           MoK\a
_diffrn_source                   'sealed X-ray tube'
_diffrn_measurement_device_type  'New Xcalibur, AtlasS2'
_diffrn_measurement_method       '\w scans'
_diffrn_detector_area_resol_mean 10.6
_diffrn_reflns_number            8980
_diffrn_reflns_av_unetI/netI     0.0092
_diffrn_reflns_av_R_equivalents  0.0148
_diffrn_reflns_limit_h_min       -20
_diffrn_reflns_limit_h_max       15
_diffrn_reflns_limit_k_min       -19
_diffrn_reflns_limit_k_max       19
_diffrn_reflns_limit_l_min       -14
_diffrn_reflns_limit_l_max       19
_diffrn_reflns_theta_min         1.964
_diffrn_reflns_theta_max         29.580
_diffrn_reflns_theta_full        25.242
_diffrn_measured_fraction_theta_max 0.945
_diffrn_measured_fraction_theta_full 0.998
_diffrn_reflns_Laue_measured_fraction_max 0.945
_diffrn_reflns_Laue_measured_fraction_full 0.998
_diffrn_reflns_point_group_measured_fraction_max 0.945
_diffrn_reflns_point_group_measured_fraction_full 0.998
_reflns_number_total             1223
_reflns_number_gt                1101
_reflns_threshold_expression     'I > 2\s(I)'
_reflns_Friedel_coverage         0.000
_reflns_Friedel_fraction_max     .
_reflns_Friedel_fraction_full    .

_reflns_special_details          
;
 Reflections were merged by SHELXL according to the crystal
 class for the calculation of statistics and refinement.
 
 _reflns_Friedel_fraction is defined as the number of unique
 Friedel pairs measured divided by the number that would be
 possible theoretically, ignoring centric projections and
 systematic absences.
;
_computing_data_collection       'CrysAlisPro 1.171.39.46 (Rigaku OD, 2018)'
_computing_cell_refinement       'CrysAlisPro 1.171.39.46 (Rigaku OD, 2018)'
_computing_data_reduction        'CrysAlisPro 1.171.39.46 (Rigaku OD, 2018)'
_computing_structure_solution    'SHELXT-2018 (Sheldrick, 2015)'
_computing_structure_refinement  'SHELXL-2018 (Sheldrick, 2015)'
_computing_molecular_graphics    'ShelXle (H\"ubschle, 2011)'
_computing_publication_material  'CIFTAB (Sheldrick, 2015)'

_refine_special_details          ?
_refine_ls_structure_factor_coef Fsqd
_refine_ls_matrix_type           full
_refine_ls_weighting_scheme      calc
_refine_ls_weighting_details     
'w=1/[\s^2^(Fo^2^)+(0.0258P)^2^+13.1560P] where P=(Fo^2^+2Fc^2^)/3'
_atom_sites_solution_primary     dual
_atom_sites_solution_secondary   difmap
_atom_sites_solution_hydrogens   mixed
_refine_ls_hydrogen_treatment    mixed
_refine_ls_extinction_method     none
_refine_ls_extinction_coef       .
_refine_ls_number_reflns         1223
_refine_ls_number_parameters     72
_refine_ls_number_restraints     13
_refine_ls_R_factor_all          0.0237
_refine_ls_R_factor_gt           0.0199
_refine_ls_wR_factor_ref         0.0565
_refine_ls_wR_factor_gt          0.0553
_refine_ls_goodness_of_fit_ref   1.091
_refine_ls_restrained_S_all      1.097
_refine_ls_shift/su_max          0.001
_refine_ls_shift/su_mean         0.000

loop_
_atom_site_label
_atom_site_type_symbol
_atom_site_fract_x
_atom_site_fract_y
_atom_site_fract_z
_atom_site_U_iso_or_equiv
_atom_site_adp_type
_atom_site_occupancy
_atom_site_site_symmetry_order
_atom_site_calc_flag
_atom_site_refinement_flags_posn
_atom_site_refinement_flags_adp
_atom_site_refinement_flags_occupancy
_atom_site_disorder_assembly
_atom_site_disorder_group
Mo1 Mo 0.37066(3) 0.500000 0.500000 0.02081(11) Uani 1 4 d S T P . .
Mo2 Mo 0.500000 0.500000 0.37013(4) 0.02093(14) Uani 1 8 d S T P . .
I2 I 0.36513(2) 0.36513(2) 0.36687(2) 0.02599(9) Uani 1 2 d S T P . .
C1 C 0.2210(4) 0.500000 0.500000 0.0300(12) Uani 1 4 d S T P . .
N1 N 0.1436(4) 0.500000 0.500000 0.0467(15) Uani 1 4 d S T P . .
O2 O 0.508(3) 0.508(3) 0.2300(5) 0.037(7) Uani 0.25 2 d S TU P . .
C2 C 0.500000 0.4739(12) 0.1501(9) 0.037(6) Uani 0.25 2 d S TU P . .
H2A H 0.530740 0.414643 0.148180 0.055 Uiso 0.125 1 calc R U P . .
H2B H 0.527585 0.514789 0.104685 0.055 Uiso 0.125 1 calc R U P . .
H2C H 0.435152 0.465877 0.136043 0.055 Uiso 0.125 1 calc R U P . .
N1N N 0.500000 0.000000 0.250000 0.0305(14) Uani 1 8 d S T P . .
C1N C 0.500000 0.0813(3) 0.1855(3) 0.0409(10) Uani 1 2 d S T P . .
H1N1 H 0.554421 0.077084 0.145544 0.049 Uiso 0.5 1 calc R U P . .
H1N2 H 0.445579 0.077084 0.145544 0.049 Uiso 0.5 1 calc R U P . .
C2N C 0.500000 0.1740(4) 0.2313(4) 0.0550(14) Uani 1 2 d DS T P . .
H2N H 0.5565(17) 0.178(3) 0.270(2) 0.066 Uiso 1 1 d D U . . .
C3N C 0.500000 0.2485(4) 0.1566(5) 0.0681(18) Uani 1 2 d DS T P . .
H31N H 0.500000 0.3060(6) 0.1898(10) 0.082 Uiso 1 2 d DS U P . .
H32N H 0.546(4) 0.248(3) 0.107(4) 0.082 Uiso 0.5 1 d D U P . .
C4N C 0.3964(7) 0.2522(7) 0.1108(7) 0.082(3) Uani 0.5 1 d D . P . .
H4N1 H 0.393122 0.302726 0.066854 0.122 Uiso 0.5 1 calc R U P . .
H4N2 H 0.351189 0.261505 0.159351 0.122 Uiso 0.5 1 calc R U P . .
H4N3 H 0.383866 0.194672 0.079020 0.122 Uiso 0.5 1 calc R U P . .

loop_
_atom_site_aniso_label
_atom_site_aniso_U_11
_atom_site_aniso_U_22
_atom_site_aniso_U_33
_atom_site_aniso_U_23
_atom_site_aniso_U_13
_atom_site_aniso_U_12
Mo1 0.0201(2) 0.0223(2) 0.0200(2) 0.000 0.000 0.000
Mo2 0.02211(19) 0.02211(19) 0.0186(3) 0.000 0.000 0.000
I2 0.02718(11) 0.02718(11) 0.02361(14) -0.00254(6) -0.00254(6) -0.00224(9)
C1 0.028(3) 0.039(3) 0.023(3) 0.000 0.000 0.000
N1 0.034(3) 0.069(4) 0.038(3) 0.000 0.000 0.000
O2 0.043(10) 0.043(10) 0.027(3) 0.004(5) 0.004(5) 0.011(8)
C2 0.013(7) 0.066(12) 0.031(5) -0.016(6) 0.000 0.000
N1N 0.032(2) 0.032(2) 0.028(3) 0.000 0.000 0.000
C1N 0.041(2) 0.043(3) 0.038(2) 0.007(2) 0.000 0.000
C2N 0.073(4) 0.041(3) 0.051(3) 0.001(3) 0.000 0.000
C3N 0.111(6) 0.037(3) 0.057(3) 0.004(3) 0.000 0.000
C4N 0.111(9) 0.063(6) 0.070(6) 0.004(5) -0.029(6) 0.009(6)

_geom_special_details            
;
 All esds (except the esd in the dihedral angle between two l.s. planes)
 are estimated using the full covariance matrix.  The cell esds are taken
 into account individually in the estimation of esds in distances, angles
 and torsion angles; correlations between esds in cell parameters are only
 used when they are defined by crystal symmetry.  An approximate (isotropic)
 treatment of cell esds is used for estimating esds involving l.s. planes.
;

loop_
_geom_bond_atom_site_label_1
_geom_bond_atom_site_label_2
_geom_bond_distance
_geom_bond_site_symmetry_2
_geom_bond_publ_flag
Mo1 Mo1 2.6827(6) 3_655 ?
Mo1 Mo1 2.6827(6) 19_566 ?
Mo1 Mo2 2.6797(5) . ?
Mo1 Mo2 2.6797(5) 17_666 ?
Mo1 I2 2.7719(2) . ?
Mo1 I2 2.7719(2) 4_565 ?
Mo1 I2 2.7719(2) 18_556 ?
Mo1 I2 2.7719(2) 19_566 ?
Mo1 C1 2.194(6) . ?
Mo2 I2 2.7976(3) . ?
Mo2 I2 2.7977(3) 2_665 ?
Mo2 I2 2.7977(3) 3_655 ?
Mo2 I2 2.7977(3) 4_565 ?
Mo2 O2 2.050(9) . ?
Mo2 O2 2.050(9) 2_665 ?
Mo2 O2 2.050(9) 3_655 ?
Mo2 O2 2.050(9) 4_565 ?
C1 N1 1.136(8) . ?
O2 C2 1.28(3) . ?
C2 H2A 0.9800 . ?
C2 H2A 0.9800 22_655 ?
C2 H2B 0.697(6) 4_565 ?
C2 H2B 0.697(6) 23_665 ?
C2 H2B 0.793(8) 2_665 ?
C2 H2B 0.793(8) 21_565 ?
C2 H2B 0.9800 . ?
C2 H2B 0.9800 22_655 ?
C2 H2C 0.7849(16) 3_655 ?
C2 H2C 0.7849(16) 24 ?
C2 H2C 0.9800 . ?
C2 H2C 0.9800 22_655 ?
N1N C1N 1.518(5) . ?
N1N C1N 1.518(5) 27 ?
N1N C1N 1.518(5) 2_655 ?
N1N C1N 1.518(5) 28_545 ?
C1N H1N1 0.9900 . ?
C1N H1N2 0.9900 . ?
C1N C2N 1.514(7) . ?
C2N H2N 1.001(10) . ?
C2N H2N 1.001(10) 22_655 ?
C2N C3N 1.543(8) . ?
C2N C3N 1.543(8) 22_655 ?
C3N C3N 0.000(18) 22_655 ?
C3N H31N 0.973(8) . ?
C3N H32N 0.986(10) . ?
C3N H32N 0.986(10) 22_655 ?
C3N C4N 1.660(8) . ?
C3N C4N 1.660(8) 22_655 ?
C4N H4N1 0.9800 . ?
C4N H4N2 0.9800 . ?
C4N H4N3 0.9800 . ?

loop_
_geom_angle_atom_site_label_1
_geom_angle_atom_site_label_2
_geom_angle_atom_site_label_3
_geom_angle
_geom_angle_site_symmetry_1
_geom_angle_site_symmetry_3
_geom_angle_publ_flag
Mo1 Mo1 Mo1 90.0 19_566 3_655 ?
Mo1 Mo1 I2 61.059(8) 3_655 . ?
Mo1 Mo1 I2 61.059(8) 3_655 18_556 ?
Mo1 Mo1 I2 61.059(8) 19_566 4_565 ?
Mo1 Mo1 I2 61.059(8) 19_566 19_566 ?
Mo1 Mo1 I2 121.685(9) 19_566 . ?
Mo1 Mo1 I2 121.686(9) 3_655 4_565 ?
Mo1 Mo1 I2 121.686(9) 3_655 19_566 ?
Mo1 Mo1 I2 121.686(9) 19_566 18_556 ?
Mo2 Mo1 Mo1 59.964(6) 17_666 3_655 ?
Mo2 Mo1 Mo1 59.964(6) 17_666 19_566 ?
Mo2 Mo1 Mo1 59.965(6) . 3_655 ?
Mo2 Mo1 Mo1 59.965(6) . 19_566 ?
Mo2 Mo1 Mo2 89.88(2) 17_666 . ?
Mo2 Mo1 I2 61.723(8) . . ?
Mo2 Mo1 I2 61.724(8) . 4_565 ?
Mo2 Mo1 I2 61.725(8) 17_666 18_556 ?
Mo2 Mo1 I2 61.725(8) 17_666 19_566 ?
Mo2 Mo1 I2 121.005(12) . 18_556 ?
Mo2 Mo1 I2 121.005(12) . 19_566 ?
Mo2 Mo1 I2 121.005(12) 17_666 . ?
Mo2 Mo1 I2 121.005(12) 17_666 4_565 ?
I2 Mo1 I2 88.849(9) . 18_556 ?
I2 Mo1 I2 88.849(9) 19_566 4_565 ?
I2 Mo1 I2 91.053(9) . 4_565 ?
I2 Mo1 I2 91.053(9) 19_566 18_556 ?
I2 Mo1 I2 176.648(19) 4_565 18_556 ?
I2 Mo1 I2 176.649(19) . 19_566 ?
C1 Mo1 Mo1 135.0 . 3_655 ?
C1 Mo1 Mo1 135.0 . 19_566 ?
C1 Mo1 Mo2 135.062(11) . . ?
C1 Mo1 Mo2 135.063(11) . 17_666 ?
C1 Mo1 I2 88.324(9) . 4_565 ?
C1 Mo1 I2 88.324(9) . 18_556 ?
C1 Mo1 I2 88.324(9) . 19_566 ?
C1 Mo1 I2 88.325(9) . . ?
Mo1 Mo2 Mo1 60.072(13) . 3_655 ?
Mo1 Mo2 Mo1 60.072(13) . 19_566 ?
Mo1 Mo2 Mo1 60.073(13) 17_666 3_655 ?
Mo1 Mo2 Mo1 60.073(13) 19_566 17_666 ?
Mo1 Mo2 Mo1 90.12(2) . 17_666 ?
Mo1 Mo2 Mo1 90.13(2) 19_566 3_655 ?
Mo1 Mo2 I2 60.758(7) . 4_565 ?
Mo1 Mo2 I2 60.758(7) 3_655 . ?
Mo1 Mo2 I2 60.758(7) 3_655 3_655 ?
Mo1 Mo2 I2 60.758(7) 17_666 2_665 ?
Mo1 Mo2 I2 60.758(7) 17_666 3_655 ?
Mo1 Mo2 I2 60.758(7) 19_566 2_665 ?
Mo1 Mo2 I2 60.758(7) 19_566 4_565 ?
Mo1 Mo2 I2 60.759(7) . . ?
Mo1 Mo2 I2 120.827(16) . 2_665 ?
Mo1 Mo2 I2 120.827(16) . 3_655 ?
Mo1 Mo2 I2 120.827(16) 3_655 2_665 ?
Mo1 Mo2 I2 120.827(16) 3_655 4_565 ?
Mo1 Mo2 I2 120.827(16) 17_666 4_565 ?
Mo1 Mo2 I2 120.827(16) 19_566 3_655 ?
Mo1 Mo2 I2 120.828(16) 17_666 . ?
Mo1 Mo2 I2 120.828(16) 19_566 . ?
I2 Mo2 I2 90.0 . 3_655 ?
I2 Mo2 I2 178.06(3) . 2_665 ?
I2 Mo2 I2 178.06(3) 4_565 3_655 ?
I2 Mo2 I2 90.0 . 4_565 ?
I2 Mo2 I2 90.0 2_665 3_655 ?
I2 Mo2 I2 90.0 2_665 4_565 ?
O2 Mo2 Mo1 138.3(10) . . ?
O2 Mo2 Mo1 138.3(10) . 3_655 ?
O2 Mo2 Mo1 138.3(10) 2_665 17_666 ?
O2 Mo2 Mo1 138.3(10) 2_665 19_566 ?
O2 Mo2 Mo1 138.3(10) 3_655 3_655 ?
O2 Mo2 Mo1 138.3(10) 3_655 17_666 ?
O2 Mo2 Mo1 138.3(10) 4_565 . ?
O2 Mo2 Mo1 138.3(10) 4_565 19_566 ?
O2 Mo2 Mo1 131.4(11) . 17_666 ?
O2 Mo2 Mo1 131.4(11) . 19_566 ?
O2 Mo2 Mo1 131.4(11) 2_665 . ?
O2 Mo2 Mo1 131.4(11) 2_665 3_655 ?
O2 Mo2 Mo1 131.4(11) 3_655 . ?
O2 Mo2 Mo1 131.4(11) 3_655 19_566 ?
O2 Mo2 Mo1 131.4(11) 4_565 3_655 ?
O2 Mo2 Mo1 131.4(11) 4_565 17_666 ?
O2 Mo2 I2 84.1(15) . 2_665 ?
O2 Mo2 I2 84.1(15) 2_665 . ?
O2 Mo2 I2 84.1(15) 3_655 4_565 ?
O2 Mo2 I2 84.1(15) 4_565 3_655 ?
O2 Mo2 I2 89.031(13) 4_565 . ?
O2 Mo2 I2 89.032(13) . 3_655 ?
O2 Mo2 I2 89.032(13) . 4_565 ?
O2 Mo2 I2 89.032(13) 2_665 3_655 ?
O2 Mo2 I2 89.032(13) 2_665 4_565 ?
O2 Mo2 I2 89.032(13) 3_655 . ?
O2 Mo2 I2 89.032(13) 3_655 2_665 ?
O2 Mo2 I2 89.032(13) 4_565 2_665 ?
O2 Mo2 I2 94.0(15) . . ?
O2 Mo2 I2 94.0(15) 2_665 2_665 ?
O2 Mo2 I2 94.0(15) 3_655 3_655 ?
O2 Mo2 I2 94.0(15) 4_565 4_565 ?
O2 Mo2 O2 7(2) 2_665 3_655 ?
O2 Mo2 O2 7(2) 2_665 4_565 ?
O2 Mo2 O2 7(2) 3_655 . ?
O2 Mo2 O2 7(2) 4_565 . ?
O2 Mo2 O2 10(3) 2_665 . ?
O2 Mo2 O2 10(3) 4_565 3_655 ?
Mo1 I2 Mo1 57.882(15) 3_655 . ?
Mo1 I2 Mo2 57.518(13) . . ?
Mo1 I2 Mo2 57.519(13) 3_655 . ?
N1 C1 Mo1 180.0 . . ?
C2 O2 Mo2 152(4) . . ?
O2 C2 H2A 109.5 . . ?
O2 C2 H2A 115(2) . 22_655 ?
O2 C2 H2B 114.5(12) . 22_655 ?
O2 C2 H2B 109.5 . . ?
O2 C2 H2B 129(4) . 21_565 ?
O2 C2 H2B 137(3) . 2_665 ?
O2 C2 H2B 148(2) . 4_565 ?
O2 C2 H2B 155.5(15) . 23_665 ?
O2 C2 H2C 98.3(16) . 22_655 ?
O2 C2 H2C 117.6(4) . 3_655 ?
O2 C2 H2C 109.5 . . ?
O2 C2 H2C 126(2) . 24 ?
H2A C2 H2A 54.8 . 22_655 ?
H2A C2 H2B 78.5 . 4_565 ?
H2A C2 H2B 78.5 22_655 23_665 ?
H2A C2 H2B 85.8 . 21_565 ?
H2A C2 H2B 85.8 22_655 2_665 ?
H2A C2 H2B 95.0 . 23_665 ?
H2A C2 H2B 95.0 22_655 4_565 ?
H2A C2 H2B 109.5 . . ?
H2A C2 H2B 109.5 22_655 22_655 ?
H2A C2 H2B 113.3 . 2_665 ?
H2A C2 H2B 113.3 22_655 21_565 ?
H2A C2 H2B 135.5 . 22_655 ?
H2A C2 H2C 19.3 . 3_655 ?
H2A C2 H2C 19.3 22_655 24 ?
H2A C2 H2C 56.0 . 22_655 ?
H2A C2 H2C 69.1 . 24 ?
H2A C2 H2C 69.1 22_655 3_655 ?
H2A C2 H2C 109.5 . . ?
H2A C2 H2C 109.5 22_655 22_655 ?
H2B C2 H2A 135.5 . 22_655 ?
H2B C2 H2B 19.2 2_665 23_665 ?
H2B C2 H2B 19.2 4_565 21_565 ?
H2B C2 H2B 25.6 . 21_565 ?
H2B C2 H2B 25.6 2_665 22_655 ?
H2B C2 H2B 36.3 4_565 23_665 ?
H2B C2 H2B 41.4 . 4_565 ?
H2B C2 H2B 41.4 22_655 23_665 ?
H2B C2 H2B 48.8 . 22_655 ?
H2B C2 H2B 51.2 2_665 4_565 ?
H2B C2 H2B 51.2 21_565 23_665 ?
H2B C2 H2B 60.4 . 23_665 ?
H2B C2 H2B 60.4 4_565 22_655 ?
H2B C2 H2B 61.3 . 2_665 ?
H2B C2 H2B 61.3 2_665 21_565 ?
H2B C2 H2B 61.3 21_565 22_655 ?
H2B C2 H2C 49.9 21_565 22_655 ?
H2B C2 H2C 59.7 4_565 22_655 ?
H2B C2 H2C 62.0 4_565 3_655 ?
H2B C2 H2C 62.0 23_665 24 ?
H2B C2 H2C 62.1 . 22_655 ?
H2B C2 H2C 66.9 2_665 24 ?
H2B C2 H2C 66.9 21_565 3_655 ?
H2B C2 H2C 85.8 4_565 24 ?
H2B C2 H2C 85.8 23_665 3_655 ?
H2B C2 H2C 90.2 . 3_655 ?
H2B C2 H2C 90.2 22_655 24 ?
H2B C2 H2C 95.7 23_665 22_655 ?
H2B C2 H2C 105.0 2_665 3_655 ?
H2B C2 H2C 105.0 21_565 24 ?
H2B C2 H2C 109.5 . . ?
H2B C2 H2C 109.5 22_655 22_655 ?
H2B C2 H2C 110.2 2_665 22_655 ?
H2B C2 H2C 122.0 . 24 ?
H2B C2 H2C 122.0 22_655 3_655 ?
H2C C2 H2A 56.0 . 22_655 ?
H2C C2 H2B 49.9 . 2_665 ?
H2C C2 H2B 59.7 . 23_665 ?
H2C C2 H2B 62.1 . 22_655 ?
H2C C2 H2B 95.7 . 4_565 ?
H2C C2 H2B 110.2 . 21_565 ?
H2C C2 H2C 40.5 . 24 ?
H2C C2 H2C 40.5 3_655 22_655 ?
H2C C2 H2C 79.2 3_655 24 ?
H2C C2 H2C 118.5 . 3_655 ?
H2C C2 H2C 118.5 22_655 24 ?
H2C C2 H2C 152.1 . 22_655 ?
C1N N1N C1N 103.5(4) 2_655 . ?
C1N N1N C1N 103.5(4) 27 28_545 ?
C1N N1N C1N 112.54(19) 27 . ?
C1N N1N C1N 112.54(19) 27 2_655 ?
C1N N1N C1N 112.54(19) 2_655 28_545 ?
C1N N1N C1N 112.54(19) 28_545 . ?
N1N C1N H1N1 108.4 . . ?
N1N C1N H1N2 108.4 . . ?
H1N1 C1N H1N2 107.4 . . ?
C2N C1N N1N 115.6(4) . . ?
C2N C1N H1N1 108.4 . . ?
C2N C1N H1N2 108.4 . . ?
C1N C2N H2N 107(2) . . ?
C1N C2N H2N 107(2) . 22_655 ?
C1N C2N C3N 108.9(5) . . ?
C1N C2N C3N 108.9(5) . 22_655 ?
H2N C2N H2N 112(5) . 22_655 ?
C3N C2N H2N 111(3) . . ?
C3N C2N H2N 111(3) . 22_655 ?
C3N C2N H2N 111(3) 22_655 . ?
C3N C2N H2N 111(3) 22_655 22_655 ?
C3N C2N C3N 0.0(5) 22_655 . ?
C2N C3N H31N 105.2(10) . . ?
C2N C3N H32N 121(5) . . ?
C2N C3N H32N 121(5) . 22_655 ?
C2N C3N C4N 107.9(4) . . ?
C2N C3N C4N 107.9(4) . 22_655 ?
C3N C3N C2N 0(10) 22_655 . ?
C3N C3N H31N 0(10) 22_655 . ?
C3N C3N H32N 0(10) 22_655 . ?
C3N C3N H32N 0(10) 22_655 22_655 ?
C3N C3N C4N 0(10) 22_655 . ?
C3N C3N C4N 0(10) 22_655 22_655 ?
H31N C3N H32N 111.3(15) . . ?
H31N C3N H32N 111.3(15) . 22_655 ?
H32N C3N H32N 87(10) . 22_655 ?
C4N C3N H31N 99.9(5) . . ?
C4N C3N H31N 99.9(5) 22_655 . ?
C4N C3N H32N 23(5) . 22_655 ?
C4N C3N H32N 23(5) 22_655 . ?
C4N C3N H32N 110(5) . . ?
C4N C3N H32N 110(5) 22_655 22_655 ?
C4N C3N C4N 132.4(9) . 22_655 ?
C3N C4N C3N 0.0(6) 22_655 . ?
C3N C4N H32N 27(4) . 22_655 ?
C3N C4N H32N 27(4) 22_655 22_655 ?
C3N C4N H4N1 109.5 . . ?
C3N C4N H4N1 109.5 22_655 . ?
C3N C4N H4N2 109.5 . . ?
C3N C4N H4N2 109.5 22_655 . ?
C3N C4N H4N3 109.5 . . ?
C3N C4N H4N3 109.5 22_655 . ?
H4N1 C4N H32N 93.5 . 22_655 ?
H4N1 C4N H4N2 109.5 . . ?
H4N1 C4N H4N3 109.5 . . ?
H4N2 C4N H32N 136.6 . 22_655 ?
H4N2 C4N H4N3 109.5 . . ?
H4N3 C4N H32N 95.9 . 22_655 ?

_refine_diff_density_max         2.815
_refine_diff_density_min         -0.899
_refine_diff_density_rms         0.108

_shelx_res_file                  
;
TITL pr780 in I4/mmm; 150K; Xcalibur
    pr780.res
    created by SHELXL-2018/3 at 16:53:17 on 19-Aug-2020
CELL  0.71073  14.6656  14.6656  14.5746   90.000   90.000   90.000
ZERR    2.000   0.0003   0.0003   0.0004    0.000    0.000    0.000
LATT  2
SYMM -X, -Y, Z
SYMM -Y, X, Z
SYMM Y, -X, Z
SYMM -X, Y, -Z
SYMM X, -Y, -Z
SYMM Y, X, -Z
SYMM -Y, -X, -Z
SFAC C  H   N  I  MO  O
UNIT 76 156 12 16 12 4
 
LIST 4 ! automatically inserted. Change 6 to 4 for CHECKCIF!!
TEMP -123
 
L.S. 6
BOND $H
FMAP 2
PLAN 5
 
OMIT 0
 
OMIT  0   0   2
OMIT  0   1   1
 
ACTA
 
SIZE 0.16 0.15 0.08
 
SIMU 0.01 0.01 O2 C2
 
EQIV $1 -y+1, x, z
EQIV $2 -x+1, -y+1, z
EQIV $3 y, -x+1, z
EQIV $4 1-x, +y, +z
 
FREE O2 O2_$1
FREE O2 O2_$2
FREE O2 O2_$3
 
FREE C2 C2_$1
FREE C2 C2_$2
FREE C2 C2_$3
 
FREE O2 C2_$1
FREE O2 C2_$2
FREE O2 C2_$3
 
FREE C2 O2_$1
FREE C2 O2_$2
FREE C2 O2_$3
 
DFIX 0.99 0.01 C3N H31N  C3N H32N  C2N H2N
DFIX 1.61 0.01 H31N H32N
DFIX 2.06 0.01 H31N C4N  H31N C4N_$4
DFIX 2.02 0.01 H31N C2N
 
FREE H32N C3N_$4
 
WGHT    0.025800   13.156001
FVAR       0.71102
MO1   5    0.370655    0.500000    0.500000    10.25000    0.02012    0.02227 =
         0.02004    0.00000    0.00000    0.00000
MO2   5    0.500000    0.500000    0.370129    10.12500    0.02211    0.02211 =
         0.01858    0.00000    0.00000    0.00000
I2    4    0.365130    0.365130    0.366873    10.50000    0.02718    0.02718 =
         0.02361   -0.00254   -0.00254   -0.00224
C1    1    0.221039    0.500000    0.500000    10.25000    0.02815    0.03867 =
         0.02329    0.00000    0.00000    0.00000
N1    3    0.143587    0.500000    0.500000    10.25000    0.03379    0.06891 =
         0.03754    0.00000    0.00000    0.00000
O2    6    0.508496    0.508496    0.230013    10.12500    0.04258    0.04258 =
         0.02680    0.00405    0.00405    0.01148
C2    1    0.500000    0.473945    0.150091    10.12500    0.01328    0.06568 =
         0.03121   -0.01642    0.00000    0.00000
AFIX 133
H2A   2    0.530740    0.414643    0.148180    10.12500   -1.50000
H2B   2    0.527585    0.514789    0.104685    10.12500   -1.50000
H2C   2    0.435152    0.465877    0.136043    10.12500   -1.50000
AFIX   0
N1N   3    0.500000    0.000000    0.250000    10.12500    0.03181    0.03181 =
         0.02793    0.00000    0.00000    0.00000
C1N   1    0.500000    0.081286    0.185511    10.50000    0.04135    0.04318 =
         0.03803    0.00688    0.00000    0.00000
AFIX  23
H1N1  2    0.554421    0.077084    0.145544    10.50000   -1.20000
H1N2  2    0.445579    0.077084    0.145544    10.50000   -1.20000
AFIX   0
C2N   1    0.500000    0.173965    0.231349    10.50000    0.07266    0.04148 =
         0.05078    0.00130    0.00000    0.00000
H2N   2    0.556494    0.177530    0.269775    11.00000   -1.20000
C3N   1    0.500000    0.248451    0.156595    10.50000    0.11082    0.03658 =
         0.05687    0.00413    0.00000    0.00000
H31N  2    0.500000    0.305999    0.189830    10.50000   -1.20000
H32N  2    0.546104    0.248406    0.107343    10.50000   -1.20000
C4N   1    0.396437    0.252225    0.110760    10.50000    0.11141    0.06317 =
         0.07010    0.00446   -0.02851    0.00862
AFIX  37
H4N1  2    0.393122    0.302726    0.066854    10.50000   -1.50000
H4N2  2    0.351189    0.261505    0.159351    10.50000   -1.50000
H4N3  2    0.383866    0.194672    0.079020    10.50000   -1.50000
AFIX   0
HKLF 4
 
 
 
 
REM  pr780 in I4/mmm; 150K; Xcalibur
REM wR2 = 0.0565, GooF = S = 1.091, Restrained GooF = 1.097 for all data
REM R1 = 0.0199 for 1101 Fo > 4sig(Fo) and 0.0237 for all 1223 data
REM 72 parameters refined using 13 restraints
 
END
 
WGHT      0.0258     13.1556
 
REM Highest difference peak  2.815,  deepest hole -0.899,  1-sigma level  0.108
Q1    1   0.5000  0.5000  0.0642  10.12500  0.05    2.82
Q2    1   0.5000  0.4350  0.1785  10.50000  0.05    0.55
Q3    1   0.5000  0.2106  0.0918  10.50000  0.05    0.44
Q4    1   0.5000  0.1082  0.2422  10.50000  0.05    0.44
Q5    1   0.3573  0.4248  0.3612  11.00000  0.05    0.41
;
_shelx_res_checksum              60045

_shelx_hkl_file                  
;
   0   0  -2 5456.85 75.4339   3
   0   0  -2 5508.58 84.9985   1
   0   0   2 5532.38 85.0038   1
   0   0   2 5404.57 74.9806   3
   0   0   4 151667. 1255.29   1
   0   0   4 151207. 1220.77   3
   0   0  -4 147595. 1222.30   3
   0   0   6 124498. 1069.85   3
   0   0   6 125024. 1119.48   1
   0   0  -6 124795. 1077.71   3
   0   0   8 340866. 2769.05   3
   0   0   8 345341. 2843.32   1
   0   0  -8 344272. 2785.88   3
   0   0 -10 1987.80 95.0895   3
   0   0  10 2083.65 111.204   1
   0   0  10 1965.62 90.6571   3
   0   0  12 15534.4 340.550   1
   0   0  12 15592.6 286.774   3
   0   0 -12 15485.6 303.024   3
   0   0  14 56779.1 691.090   3
   0   0  14 56588.2 793.568   1
   0   0  16 49728.3 786.262   1
   0   0  16 48799.9 656.154   3
   0   0  18 3319.22 203.203   1
   1   0  -1 207236. 1603.18   3
   0  -1  -1 205929. 1607.93   3
  -1   0  -1 206275. 1607.33   4
  -1   0  -3 12029.7 134.934   3
   0  -1  -3 11642.3 158.607   3
   0   1  -3 12028.3 141.907   3
   0   1   3 12239.5 157.163   3
  -1   0   3 12406.8 159.564   1
   0  -1   3 12348.6 167.458   1
   0  -1   3 12003.1 141.706   3
  -1   0   3 12588.8 160.253   3
   1   0   3 12006.7 166.698   4
   1   0   3 12085.8 165.942   1
   1   0   3 11900.2 132.356   3
   0   1  -3 12235.3 165.926   1
   1   0  -3 12078.2 157.957   1
   0   1   3 12227.9 150.778   4
   1   0  -3 11417.3 158.211   3
  -1   0  -5 2166.90 64.9248   3
   0   1   5 2240.46 75.1171   3
  -1   0   5 2299.66 81.7588   1
   0  -1   5 2355.06 86.4694   1
   0   1  -5 2126.07 81.8398   1
  -1   0   5 2199.40 75.3942   3
   1   0   5 2284.64 62.9488   3
   0   1   5 2242.11 83.9844   1
   1   0   5 2090.18 78.5198   4
   0  -1   5 2252.95 66.9495   3
   1   0  -5 2112.64 74.2853   3
   0  -1  -5 2124.44 75.9200   3
   1   0   5 2247.47 83.9135   1
   0   1  -5 2160.12 66.8152   3
   1   0   7 197767. 1630.02   3
   0  -1   7 200656. 1640.26   3
   1   0   7 198495. 1712.26   4
   1   0  -7 197498. 1678.08   3
   0  -1   7 192003. 1708.85   1
  -1   0   7 200723. 1704.13   1
  -1   0   7 197627. 1669.96   3
   0   1   7 198096. 1685.38   4
   0   1   7 194062. 1707.51   1
   0   1  -7 198279. 1647.79   3
   0   1  -7 197204. 1710.60   1
   1   0   7 205419. 1720.53   1
  -1   0  -7 197007. 1643.11   3
   0   1   7 196397. 1662.21   3
   0  -1  -7 199391. 1676.38   3
   0   1  -9 46580.7 528.673   3
   1   0   9 47294.2 510.877   3
  -1   0  -9 46779.0 525.231   3
   0   1   9 46861.2 536.236   3
   0   1   9 47489.9 567.768   4
  -1   0   9 47208.2 583.624   1
   1   0   9 47162.5 589.639   1
   0   1   9 47133.6 585.295   1
   1   0   9 47859.8 587.434   4
   0  -1  -9 47824.1 553.704   3
   0  -1   9 46863.9 518.625   3
   1   0  -9 48636.3 558.496   3
   0  -1   9 47187.3 587.854   1
  -1   0   9 46513.7 541.548   3
   0  -1 -11 16905.2 312.954   3
   0  -1  11 16976.4 342.008   1
   0   1  11 17492.2 328.378   4
   0  -1  11 16849.6 282.133   3
   0   1  11 16358.2 334.007   1
  -1   0  11 16625.4 297.929   3
   1   0  11 16434.4 274.639   3
   1   0 -11 16618.5 311.557   3
   0   1 -11 16701.3 295.401   3
  -1   0  11 16345.1 334.333   1
   1   0  11 16858.7 338.349   4
   0   1  11 16468.2 292.661   3
  -1   0 -11 16752.9 293.424   3
   1   0  11 17024.0 340.681   1
   0  -1 -13 1195.46 93.5309   3
   0   1 -13 1092.51 84.6228   3
  -1   0 -13 1135.46 84.7117   3
   0  -1  13 1062.16 78.0409   3
  -1   0  13 1167.24 104.800   1
   1   0  13 1189.90 80.5188   3
   0   1  13 1133.15 103.553   1
   0  -1  13 1007.19 99.2223   1
   0   1  13 1103.03 84.4218   3
   1   0  13 1100.79 106.670   1
  -1   0  13 1366.92 93.2889   3
   1   0  15 54486.7 793.966   1
  -1   0  15 54035.7 695.117   3
   1   0  15 53434.8 651.540   3
   0   1  15 53940.1 684.360   3
   0  -1  15 55213.8 791.488   1
  -1   0  15 56244.6 791.741   1
   0   1  15 55069.0 790.614   1
  -1   0  17 2376.74 169.320   1
  -1   0  17 2348.61 137.948   3
   1   0  17 2558.99 174.523   1
   0  -1  17 2339.68 128.676   3
   1   0  17 2302.73 125.071   3
   0   1  17 2264.98 133.149   3
   0   1  17 2403.98 173.937   1
  -1   1   0 160378. 1250.50   3
  -1   1   0 161555. 1265.51   2
  -1   1  -2 25853.5 260.531   1
   1  -1  -2 25371.3 264.501   3
   1  -1   2 25972.1 260.528   1
   1   1  -2 26313.1 256.739   3
   1   1   2 25877.3 250.351   3
  -1  -1  -2 25855.9 260.251   4
  -1  -1   2 26237.4 256.211   3
  -1   1   2 25571.8 263.895   3
   1   1   2 26015.9 258.480   4
  -1  -1   4 50140.0 488.799   1
   1   1   4 48983.6 481.715   4
  -1  -1  -4 49343.0 465.323   3
  -1   1  -4 50183.0 492.793   1
   1   1   4 48444.9 460.890   3
  -1  -1   4 49743.4 470.468   3
  -1   1   4 49805.6 483.359   3
   1   1  -4 49263.7 471.588   3
  -1   1  -4 49169.3 431.985   3
   1  -1   4 49532.3 493.728   1
   1  -1  -4 49579.8 487.787   3
  -1   1  -6 26654.0 295.195   3
   1   1  -6 27095.6 326.201   3
   1   1   6 26117.2 310.061   3
   1  -1   6 26810.9 290.357   3
   1  -1   6 27418.5 354.748   1
  -1  -1   6 27053.4 349.643   1
  -1   1  -6 26767.2 352.442   1
   1  -1  -6 26607.2 338.650   3
  -1   1   6 26732.6 335.742   3
  -1   1   6 27204.0 346.070   1
  -1  -1   6 27673.3 324.005   3
   1   1   6 27044.6 342.712   4
   1   1  -6 27070.5 348.890   1
  -1  -1  -6 26833.1 321.699   3
   1   1   6 27169.1 351.896   1
  -1   1   8 90174.8 881.874   3
   1  -1  -8 90960.7 895.473   3
   1  -1   8 91148.5 826.044   3
   1   1   8 92380.5 922.720   1
  -1   1   8 91274.3 911.766   1
   1   1  -8 92713.1 918.792   1
   1   1   8 91758.0 852.469   3
  -1  -1   8 91540.4 918.248   1
  -1   1  -8 91229.5 840.170   3
  -1  -1  -8 89866.6 868.417   3
   1  -1   8 92790.4 926.523   1
   1   1   8 92773.8 908.932   4
   1   1  -8 90365.8 874.149   3
  -1  -1 -10 390.164 52.2753   3
  -1   1  10 313.435 51.1381   3
   1   1  10 298.684 59.0569   1
   1   1 -10 287.444 47.7990   3
   1  -1  10 367.300 42.5922   3
   1   1  10 352.327 56.0615   4
   1  -1  10 317.316 59.7326   1
   1   1  10 350.121 46.9137   3
  -1  -1  10 363.496 49.8909   3
   1  -1 -10 359.352 54.2912   3
  -1  -1  10 370.543 60.3879   1
  -1   1  10 274.929 52.9893   1
  -1   1 -10 302.551 42.4268   3
   1   1  12 6455.62 175.588   3
  -1   1 -12 6243.36 174.739   3
   1  -1  12 6584.03 220.526   1
   1   1 -12 6838.66 196.433   3
   1  -1 -12 6615.14 201.780   3
  -1   1  12 6476.26 212.021   1
  -1  -1 -12 6540.13 188.520   3
  -1   1  12 6717.22 203.410   4
   1  -1  12 6357.22 164.417   3
   1   1  12 6245.18 211.743   1
  -1   1  12 6359.51 187.252   3
  -1  -1  12 6661.32 217.807   1
  -1  -1  12 6705.73 184.495   3
   1  -1  14 21201.8 346.230   3
  -1  -1  14 20224.1 369.887   3
  -1  -1  14 20936.8 435.342   1
   1   1  14 21104.6 440.149   1
   1   1  14 20537.2 360.368   3
  -1   1  14 20487.1 383.028   3
  -1   1  14 20258.6 427.256   1
   1  -1  14 20600.4 440.984   1
  -1   1 -14 20578.5 367.476   3
  -1  -1 -14 20882.2 385.479   3
   1   1  16 12481.2 359.485   1
  -1  -1  16 12244.1 296.008   3
   1   1  16 12783.4 290.934   3
  -1   1  16 11943.5 302.032   3
   1  -1  16 12596.9 364.257   1
   1  -1  16 12728.2 276.144   3
  -1   1  16 12516.6 356.597   1
  -1   1  18 424.033 100.809   1
  -1   1  18 408.257 77.5552   3
  -1  -1  18 485.577 77.7898   3
   1   1  18 306.936 95.5734   1
   0  -2   0 71357.8 601.582   2
   2   0   0 71673.1 585.749   3
  -2   0   0 71232.2 597.839   4
   0   2   2 964.335 31.1301   4
   2   0   2 991.081 47.5400   4
   2   0  -2 1033.36 47.0795   3
   2   0  -2 963.101 33.1126   1
  -2   0  -2 875.914 49.0163   4
   0   2   2 941.448 47.8363   3
  -2   0   2 1009.59 34.5054   1
   0  -2  -2 845.233 46.6641   3
  -2   0   2 893.421 44.5898   3
   0  -2  -2 992.432 32.3953   4
   0   2  -4 10613.3 175.429   1
   2   0  -4 10854.7 161.274   1
  -2   0  -4 10672.7 129.548   3
   0   2  -4 10476.4 146.282   3
   2   0   4 10650.8 177.625   4
   2   0  -4 10271.7 172.089   3
   0   2   4 10663.7 170.921   3
  -2   0   4 10747.5 161.668   1
   2   0   4 10884.8 172.817   1
   2   0   4 10620.5 126.088   3
   0  -2  -4 10427.0 173.724   3
   0   2   4 10406.4 147.740   4
  -2   0   4 10867.6 171.267   3
   0   2  -6 9494.49 189.194   1
   0  -2  -6 9582.87 183.963   3
   0   2  -6 9407.44 156.481   3
  -2   0   6 9143.75 179.492   3
   0  -2   6 9821.75 192.934   1
   0   2   6 9322.98 166.090   4
   2   0  -6 9652.06 181.973   3
   2   0   6 9604.51 191.818   4
  -2   0  -6 9380.07 146.223   3
   2   0   6 9537.97 140.212   3
  -2   0   6 9671.26 181.218   1
   2   0   6 9538.99 189.242   1
   0  -2   6 9696.33 155.072   3
   0   2   6 9539.13 179.003   3
  -2   0  -8 7866.69 153.565   3
   0   2  -8 8552.58 201.814   1
   2   0   8 8079.75 197.199   4
  -2   0   8 7915.14 181.487   3
   2   0  -8 8049.54 185.291   3
   2   0   8 8051.37 196.781   1
   0   2   8 8072.89 176.472   4
   0  -2   8 7976.98 157.928   3
   0   2   8 7776.52 176.084   3
   0   2  -8 8244.29 164.028   3
  -2   0   8 8017.33 190.211   1
   0  -2   8 8043.82 197.632   1
   0  -2  -8 8088.68 186.921   3
   0   2   8 8075.43 194.198   1
   0   2 -10 2052.54 92.0964   3
   0   2  10 1986.64 100.783   4
   2   0  10 2102.96 83.3883   3
  -2   0  10 2200.86 106.261   3
   0  -2  10 2124.69 116.730   1
   0  -2 -10 2036.48 104.801   3
   0  -2  10 1992.87 87.1320   3
   2   0  10 2083.80 111.364   4
   0   2  10 2119.95 101.726   3
   0   2  10 1914.68 110.545   1
   2   0  10 2321.39 119.096   1
   2   0 -10 2031.26 104.117   3
  -2   0 -10 2128.90 88.7896   3
  -2   0  10 2239.54 114.152   1
   0  -2  12 1734.40 90.2669   3
   0   2  12 1697.81 116.286   1
   0   2  12 1527.24 96.5453   3
  -2   0  12 1563.13 98.2854   3
   0   2  12 1660.72 103.147   4
   0   2 -12 1525.68 90.3486   3
   0  -2  12 1725.21 118.939   1
  -2   0  12 1511.27 109.429   1
   2   0  12 1590.74 82.2540   3
   0  -2 -12 1675.28 107.678   3
   2   0  12 1532.21 113.168   1
  -2   0 -12 1554.51 86.6621   3
   0   2  14 1578.04 105.437   3
   0   2 -14 1511.62 103.245   3
   0   2  14 1454.41 119.476   1
  -2   0 -14 1513.98 94.0709   3
   2   0  14 1571.11 89.8112   3
   2   0  14 1762.94 132.751   1
   0  -2  14 1285.02 85.9372   3
  -2   0  14 1753.78 129.627   1
  -2   0  14 1630.84 110.212   3
   0  -2  16 2383.87 122.030   3
  -2   0  16 2484.96 167.715   1
  -2   0  16 2621.12 146.210   3
   0   2  16 2534.73 138.749   3
   2   0  16 2764.24 125.354   3
   2   0  16 2774.98 176.917   1
   0   2  16 2643.37 170.287   1
  -2   0  18 366.720 78.6446   3
   0   2  18 399.149 99.1067   1
   0   2  18 414.876 75.5173   3
   2   0  18 423.455 101.751   1
  -1   2   1 13447.6 166.731   3
   2   1   1 13288.6 165.549   4
   1  -2  -1 13264.8 166.947   3
  -2   1  -1 13407.8 160.877   4
   2  -1  -1 13167.2 159.790   3
   2   1  -1 13281.7 160.071   3
   1   2   1 12953.8 145.679   2
   2  -1   1 13163.7 159.970   4
  -2   1   1 13277.6 159.841   3
  -2  -1  -1 13280.3 164.830   4
  -2   1  -1 13017.8 140.185   1
   1   2   3 1989.87 66.6494   3
   1   2   3 1927.36 60.1669   4
  -1   2  -3 1888.87 44.0542   3
   2   1  -3 1992.46 61.6818   1
  -1   2  -3 1938.32 69.8240   1
  -2   1   3 1915.80 71.1902   3
  -2  -1   3 1965.36 67.4567   3
   1   2  -3 1903.07 61.0023   3
   2  -1   3 1964.00 64.7154   1
   2   1  -3 1902.79 66.8755   3
   2  -1   3 1916.90 70.7862   4
  -1  -2  -3 1961.11 62.4903   4
  -1   2   3 1908.79 43.2391   4
   2  -1  -3 1954.43 69.1790   3
   2   1   3 1896.67 52.8139   3
   1  -2  -3 1925.83 72.0931   3
  -2  -1  -3 1943.27 71.9859   4
  -1   2   3 2024.47 71.5317   3
   2   1   3 1984.10 66.7188   4
  -2   1  -3 1921.47 64.7874   1
  -2   1   5 73.5238 34.5894   1
   2  -1  -5 54.5483 36.0198   3
   2   1  -5 78.1438 34.8414   3
  -2   1   5 79.2727 38.1749   3
   2  -1   5 208.849 43.8536   4
  -1   2  -5 43.2281 36.8695   1
   1   2  -5 111.627 38.8295   1
   1   2  -5 60.3957 30.9168   3
   2   1  -5 58.1846 33.9594   1
   1  -2   5 115.570 40.1945   1
   1   2   5 75.6406 34.1167   3
  -2   1  -5 73.6018 38.0832   1
   2   1   5 65.9888 23.5273   3
  -1   2   5 39.2657 37.8514   3
  -2  -1  -5 74.9994 43.2730   4
   2  -1   5 130.802 39.5159   1
  -1  -2  -5 104.707 36.2088   3
   2   1   5 46.2320 28.6423   4
   1   2   5 126.232 33.3698   4
  -2  -1   5 54.9703 35.0677   3
   1  -2  -5 84.2183 39.0065   3
  -2  -1   5 74.0251 37.8234   1
  -1   2  -5 66.3006 21.0189   3
  -1  -2   5 81.1648 30.8321   3
  -2   1  -5 91.2431 19.4026   3
   1  -2   5 66.3417 21.2787   3
   2  -1   5 55.3186 15.3649   3
   1   2   7 4668.95 124.209   3
  -1   2   7 4734.27 136.652   1
   1   2   7 4808.76 129.731   4
  -2  -1   7 4874.17 138.985   1
   2  -1   7 4911.31 96.8111   3
   1   2  -7 4715.79 122.480   3
  -2  -1   7 4913.27 131.576   3
   1  -2  -7 4990.64 140.190   3
   2   1   7 5028.19 113.712   3
  -1  -2  -7 4586.31 127.047   3
   2   1   7 4881.14 140.248   4
  -2   1   7 4950.84 136.042   1
  -1   2  -7 5042.32 145.429   1
   1  -2   7 4727.03 101.986   3
   2   1   7 4862.94 143.739   1
   2  -1   7 4814.51 146.366   4
   2   1  -7 4816.71 136.770   1
  -2  -1  -7 4806.19 116.481   3
  -1   2   7 4617.77 132.134   3
   2   1  -7 4719.85 132.582   3
   2  -1   7 4932.46 144.352   1
   2  -1  -7 4992.33 140.004   3
  -1   2  -7 4782.28 106.767   3
  -1   2   7 4841.53 121.705   4
  -2   1   7 4883.78 135.965   3
  -1  -2   7 4875.55 121.606   3
  -2   1  -7 4898.43 101.747   3
   1   2  -7 5154.64 144.899   1
   1  -2   7 5019.17 147.717   1
   2  -1   9 2866.75 125.139   1
   2   1   9 2610.74 121.442   1
   1   2  -9 2758.62 120.727   1
  -2  -1   9 2790.78 119.708   1
   2   1  -9 2695.95 110.453   3
   1   2  -9 2676.27 103.288   3
  -1   2   9 2710.76 112.816   3
  -1  -2  -9 2558.17 104.885   3
  -1   2  -9 2577.33 89.6079   3
  -2   1  -9 2609.21 86.5438   3
   1   2   9 2571.06 101.790   3
  -2   1   9 2755.64 116.918   1
   2  -1   9 2654.31 82.1899   3
   2  -1  -9 2668.79 114.138   3
  -1   2  -9 2833.40 125.030   1
   1  -2   9 2595.90 122.478   1
   1  -2   9 2616.12 86.2268   3
   1  -2  -9 2688.66 115.662   3
  -2  -1   9 2571.34 105.604   3
   2   1   9 2703.32 93.5921   3
  -1   2   9 2509.71 116.790   1
   2  -1   9 2761.54 122.854   4
  -2  -1  -9 2691.20 97.5546   3
  -1  -2   9 2635.91 100.858   3
  -2   1   9 2446.14 108.607   3
   1   2   9 2993.84 116.854   4
  -1   2   9 2694.46 105.172   4
   2   1   9 2941.63 123.437   4
   1   2   9 2850.13 123.117   1
  -2  -1  11 65.1470 43.2670   3
  -1   2 -11 64.2187 30.8349   3
  -2   1 -11 48.8146 30.1100   3
   1  -2  11 20.4851 29.3322   3
  -2   1  11-24.4326 49.7088   1
  -1   2  11-25.5277 48.0511   1
   1   2  11 172.712 47.9157   4
  -2   1  11 48.9986 43.6707   3
   1   2 -11 19.3659 34.7402   3
   2  -1 -11 15.0604 41.7956   3
   2   1  11 55.3490 44.4052   4
  -2  -1  11 75.8575 56.1951   1
  -2  -1 -11 21.1602 31.4888   3
  -1   2  11-7.74485 41.2259   4
   1  -2  11 78.1684 54.1703   1
  -1   2  11 9.40891 41.6296   3
   2   1  11 43.5429 50.4077   1
   2  -1  11 111.322 32.7338   3
   2   1  11 24.5049 33.7349   3
   1  -2 -11 1.28853 41.9205   3
   2  -1  11 22.7180 49.4805   1
  -1  -2  11 10.5307 35.1826   3
  -1  -2 -11 75.8614 39.5066   3
   1   2  11 30.1168 39.5083   3
   2   1 -11 6.98177 37.5266   3
   1   2  11-6.68948 50.9983   1
  -2   1 -13 110.440 37.7304   3
  -2   1  13-12.3757 49.4033   3
   2  -1  13-16.8158 31.0712   3
  -2  -1 -13 67.7292 40.6778   3
  -2   1  13 129.413 60.1032   1
   2   1  13 16.8144 36.8890   3
  -1   2  13-29.5720 46.3230   3
  -1  -2 -13 26.0015 41.7069   3
   2   1  13-9.70127 60.3353   1
  -1   2  13-45.0092 59.5119   1
  -2  -1  13 36.1795 42.9914   3
   1   2 -13 44.1564 40.9174   3
   1  -2  13 136.931 71.8829   1
   1   2  13 38.1800 41.5653   3
   2  -1  13 64.5062 63.0526   1
  -1  -2  13 35.3169 40.4485   3
  -2  -1  13 111.724 60.9697   1
   1  -2  13 54.4016 35.8713   3
  -1   2 -13 107.501 36.8031   3
   1   2  13 3.03537 54.9440   1
   2   1  15 1162.94 84.4746   3
  -2   1  15 1175.49 118.262   1
   1   2  15 1089.58 112.943   1
   2  -1  15 1385.89 129.804   1
   2  -1  15 1281.78 82.8181   3
  -2  -1  15 1185.44 97.0825   3
   1  -2  15 1097.90 80.6894   3
  -2   1  15 1080.92 98.6143   3
  -1   2  15 1243.86 103.988   3
  -1   2  15 1050.66 114.685   1
   1   2  15 952.307 85.3838   3
  -1  -2  15 703.275 68.6570   3
   2   1  15 1272.42 122.560   1
  -1  -2  17 550.017 74.9193   3
   2   1  17 773.845 116.609   1
  -2  -1  17 603.112 84.0062   3
  -1   2  17 622.989 101.652   1
   2  -1  17 678.310 110.900   1
  -1   2  17 602.699 86.3202   3
   1   2  17 594.121 79.8072   3
  -2   1  17 629.155 101.150   1
   1   2  17 668.393 107.445   1
  -2   1  17 536.085 80.4802   3
  -2   1  19-5.71321 64.6685   3
  -2   2   0 1533.59 60.2177   2
  -2   2   0 1749.68 50.9551   3
   2  -2   0 1646.35 42.9397   4
   2  -2   0 1680.96 60.8522   2
   2  -2   0 1742.22 51.2654   3
   2   2  -2 3529.03 84.6713   3
   2   2   2 3693.19 85.7922   4
  -2   2  -2 3491.61 79.7182   1
  -2  -2  -2 3577.48 86.4667   4
   2  -2  -2 3461.98 89.0709   3
  -2   2   2 3612.19 89.1351   3
  -2   2  -4 10772.1 180.197   1
  -2   2  -4 10935.3 115.677   3
  -2  -2  -4 11062.1 182.748   4
   2   2   4 10877.6 169.161   3
   2   2  -4 11125.5 179.457   1
   2   2  -4 11061.1 177.725   3
   2  -2  -4 11209.3 190.270   3
  -2   2   4 10723.7 185.984   3
  -2  -2   4 11230.3 177.279   3
   2  -2   4 11027.5 180.821   1
   2   2   4 11051.8 178.530   4
  -2   2   6 290.834 48.6604   3
  -2   2  -6 270.803 46.7625   1
   2  -2  -6 298.372 46.3532   3
  -2  -2   6 238.341 42.0656   3
   2   2  -6 233.680 40.8998   3
   2   2   6 239.456 37.9692   3
  -2   2  -6 246.765 24.8244   3
  -2  -2  -6 238.889 45.6028   4
   2  -2   6 439.110 55.2842   1
   2   2  -6 286.916 43.8160   1
   2   2   6 337.071 45.0352   4
   2  -2   8 1600.95 94.1673   1
  -2   2  -8 1752.16 62.8647   3
   2  -2  -8 1561.49 89.7822   3
  -2   2  -8 1677.91 93.4177   1
   2   2   8 1722.99 88.4928   4
  -2   2   8 1536.61 87.5995   3
   2   2  -8 1680.15 84.4192   3
  -2  -2  -8 1521.27 75.3587   3
  -2  -2   8 1570.24 80.0743   3
   2   2  -8 1594.82 87.0319   1
   2  -2   8 1657.72 58.0166   3
  -2   2   8 1731.06 90.1362   1
   2   2   8 1636.07 76.3668   3
   2  -2  10 1534.60 104.401   1
  -2   2  10 1528.04 94.6624   3
   2   2  10 1579.09 96.9978   4
   2   2  10 1534.68 101.577   1
  -2  -2 -10 1530.66 83.8103   3
   2   2 -10 1353.12 93.1345   1
   2  -2 -10 1581.11 100.037   3
  -2   2 -10 1513.46 69.7208   3
  -2  -2  10 1436.25 85.2172   3
   2   2 -10 1493.90 88.8675   3
   2   2  10 1468.28 80.2870   3
  -2   2  10 1483.55 95.0945   1
   2  -2  10 1443.92 64.4704   3
   2  -2  12 3864.36 115.615   3
   2   2  12 3992.06 172.523   1
  -2   2 -12 3964.54 126.528   3
  -2  -2  12 3910.10 145.592   3
  -2   2  12 3848.93 163.515   1
   2   2  12 3910.22 137.320   3
  -2   2  12 4102.13 151.866   4
   2   2 -12 3813.52 149.779   3
  -2  -2 -12 3569.01 139.679   3
  -2   2  12 3954.63 156.262   3
   2  -2  12 4072.53 175.882   1
  -2  -2  14-53.9490 53.7897   3
  -2   2 -14 20.7571 34.0542   3
   2  -2  14 40.5151 34.9265   3
   2   2  14-27.4768 59.8531   1
   2   2  14 90.0165 48.2500   3
  -2   2  14 25.8844 54.0517   3
  -2   2  14 25.1323 57.5997   1
   2  -2  14 119.211 71.0640   1
  -2  -2 -14-56.7024 57.8107   3
   2   2  16 1131.51 122.483   1
  -2   2  16 1265.74 123.547   1
  -2   2  16 1054.77 104.276   3
  -2  -2  16 1108.79 96.3782   3
   2   2  16 1179.86 93.3209   3
  -2   2  18 985.529 109.138   3
  -2   2  18 901.114 125.224   1
   2   2  18 913.960 125.122   1
  -3   0  -1 38543.2 380.808   4
  -3   0   1 38346.4 367.935   3
   3   0   1 37531.6 330.629   2
   0   3   1 37497.1 379.949   2
   3   0  -1 37664.2 367.245   3
   3   0   1 37908.5 336.179   3
   3   0   1 37454.3 379.881   4
  -3   0   3 162313. 1293.89   1
   3   0  -3 162083. 1344.11   3
   3   0   3 162043. 1321.55   1
  -3   0  -3 162403. 1359.29   4
   3   0   3 160373. 1356.43   4
  -3   0   3 160102. 1345.03   3
   0   3   3 162266. 1356.25   3
   3   0  -3 160256. 1291.82   1
   0  -3  -3 160299. 1284.53   4
   0   3   3 160885. 1280.03   4
   0  -3  -3 155545. 1354.67   3
   3   0  -5 23788.5 288.403   1
   3   0   5 23595.0 235.398   3
   0   3  -5 22682.5 272.892   3
  -3   0   5 23760.7 290.472   1
   0   3   5 23595.8 270.200   4
   3   0   5 23386.1 322.883   4
   3   0   5 24253.3 313.986   1
   0   3  -5 23767.6 320.907   1
  -3   0   5 23814.6 313.197   3
   0   3   5 23623.2 315.544   3
   3   0  -5 23866.2 316.044   3
  -3   0  -5 23467.0 326.438   4
   0  -3  -5 23534.0 318.079   3
   3   0   7 28517.0 298.006   3
   0   3  -7 27364.9 335.353   3
  -3   0   7 27483.7 378.035   3
   3   0  -7 28206.9 384.130   3
   0  -3  -7 28779.7 389.342   3
   0   3   7 27838.1 343.824   4
   3   0   7 28268.5 389.159   1
  -3   0   7 28080.7 369.417   1
   0   3  -7 28921.0 396.520   1
   3   0   7 28682.2 401.815   4
   0   3   7 27422.7 376.298   3
   0  -3  -9 727.224 69.0575   3
  -3   0   9 675.683 66.5826   1
   3   0   9 693.863 67.5124   4
   0   3  -9 627.637 50.9953   3
   3   0  -9 655.818 63.8126   3
   3   0   9 534.947 64.4750   1
   0   3   9 620.232 63.2773   3
  -3   0   9 571.852 62.1997   3
   0   3  -9 593.725 65.2053   1
   0   3   9 602.429 56.4349   4
  -3   0  -9 575.763 43.7851   3
   3   0   9 822.469 47.4595   3
   0   3 -11 42730.6 526.593   3
  -3   0  11 43649.0 574.247   3
  -3   0  11 42963.2 592.002   1
   3   0  11 43531.3 610.136   1
  -3   0 -11 42011.9 492.470   3
   0   3  11 43190.9 565.293   3
   0  -3 -11 44328.6 592.478   3
   0  -3  11 44574.2 515.677   3
   0   3  11 43193.0 605.915   1
   3   0 -11 43933.1 591.445   3
   0   3  11 43954.3 556.438   4
   3   0  11 43581.1 480.791   3
   0   3 -13 190.064 45.4287   3
  -3   0 -13 141.848 38.2471   3
   3   0  13 128.253 36.0393   3
   0   3  13-13.0750 59.1195   1
   0   3  13 196.647 55.2888   3
  -3   0  13 142.510 60.0126   1
   3   0  13 148.577 63.0928   1
  -3   0  13 160.109 53.8598   3
   0   3  15 7628.95 236.171   3
   3   0  15 7608.57 272.068   1
   0   3  15 7415.72 266.256   1
   3   0  15 7872.29 190.955   3
  -3   0  15 7929.67 267.439   1
  -3   0  15 7831.63 246.796   3
  -3   0  17 403.417 80.0416   3
   0   3  17 498.102 78.6899   3
   3   0  17 480.183 102.940   1
   0   3  17 326.905 88.6896   1
  -3   0  19 7154.95 264.016   3
  -3   1   0 31168.7 317.552   2
  -3   1   0 32114.1 312.905   4
  -3   1   0 31696.4 303.362   3
  -1   3   0 30933.6 336.357   2
   3  -1   0 31675.0 304.896   3
   3  -1   0 32078.6 313.732   4
   1  -3   0 31640.6 338.128   2
  -3   1   2 762.596 47.9523   3
  -3   1   2 803.554 28.5207   1
  -3   1  -2 774.639 52.1723   4
   1  -3  -2 710.334 53.9146   3
  -3   1  -2 799.947 39.7983   1
   3  -1   2 760.807 49.6072   4
   3  -1   2 878.868 40.6437   1
  -3  -1  -2 732.361 54.0033   4
   3   1  -2 753.574 48.7344   3
  -1  -3  -2 832.748 43.7918   4
  -1   3   2 861.853 55.1314   3
   3  -1  -2 817.202 49.9364   3
  -3  -1   2 980.666 53.6786   3
  -1   3   4 29160.9 280.803   4
  -1   3  -4 28076.5 353.052   1
  -3   1  -4 29628.4 339.011   1
  -3  -1  -4 29840.7 363.436   4
  -3   1   4 30161.7 316.131   1
  -1   3  -4 29370.7 294.339   3
  -3   1   4 29632.8 353.587   3
  -1   3   4 29455.1 358.207   3
   1   3   4 29865.4 322.675   4
   3  -1   4 29404.8 361.652   4
   3   1   4 30227.8 300.546   3
  -1  -3  -4 29442.7 325.691   4
   3   1   4 29734.5 356.598   4
  -3  -1   4 29373.0 347.445   3
   1   3   4 30284.9 353.727   3
   1  -3  -4 28692.0 362.141   3
   1   3  -4 28705.2 327.783   3
   3  -1  -4 29402.5 354.595   3
   3   1  -4 29008.2 348.264   3
   3   1  -4 29592.7 324.383   1
   1   3  -6 4779.60 135.542   1
   3  -1   6 4455.14 70.8969   3
   3   1  -6 4344.34 119.257   1
  -1   3  -6 4440.11 132.536   1
  -1  -3  -6 4567.58 127.851   3
   1  -3  -6 4549.27 134.976   3
  -3   1   6 4662.44 133.737   3
  -1   3   6 4602.99 134.101   3
  -1   3  -6 4483.38 95.6267   3
   3   1   6 4385.14 126.986   1
   3   1  -6 4561.62 129.103   3
  -1   3   6 4444.57 100.476   4
  -3  -1  -6 4577.83 138.871   4
  -3   1  -6 4506.90 75.7532   3
   1   3  -6 4627.83 116.003   3
   3  -1   6 4714.22 130.566   1
  -3   1   6 4589.67 118.637   1
   3   1   6 4355.24 96.9094   3
   1   3   6 4491.47 126.455   3
   3  -1  -6 4719.20 135.140   3
   3  -1   6 4745.30 140.988   4
  -3  -1   6 4635.43 128.273   3
   1   3   6 4456.38 114.714   4
   3   1   6 4659.81 133.858   4
   3   1  -8 11224.5 229.984   3
   3  -1  -8 11799.9 240.456   3
  -1  -3  -8 11761.0 232.859   3
   3  -1   8 11457.1 158.054   3
   3   1  -8 11825.6 232.396   1
   3  -1   8 11548.5 253.089   4
  -1   3   8 11282.1 200.274   4
  -3   1   8 11436.1 225.241   1
  -3   1   8 11667.3 235.480   3
  -1   3  -8 11777.8 247.141   1
   1   3   8 10920.4 219.950   3
  -3   1  -8 11285.2 164.658   3
   3  -1   8 11299.9 239.797   1
  -1   3  -8 11198.8 186.220   3
  -3  -1   8 11490.1 228.055   3
   1  -3  -8 11570.9 241.591   3
   1   3   8 11664.4 218.663   4
   3   1   8 11394.9 241.727   1
   1   3  -8 11907.1 244.978   1
   3   1   8 11676.4 243.096   4
  -3  -1   8 11788.4 233.841   1
   3   1   8 11597.1 185.426   3
   1   3  -8 11332.8 210.720   3
  -1  -3   8 11153.9 204.108   3
  -1   3   8 10946.4 230.410   3
   3   1 -10 3074.08 128.991   3
  -1   3  10 2924.62 112.028   4
  -3   1  10 2961.83 127.924   3
  -3   1  10 2980.41 129.013   1
  -3  -1  10 3222.78 136.061   1
  -1  -3  10 2847.50 109.621   3
   3   1  10 3024.43 135.589   1
  -3  -1  10 3034.52 124.838   3
   3  -1 -10 3220.34 140.532   3
  -1  -3 -10 3145.16 129.386   3
  -1   3  10 2932.73 133.594   1
   3   1  10 3042.81 100.990   3
   1  -3 -10 3141.52 137.049   3
  -3   1 -10 2884.08 90.9983   3
  -1   3  10 2787.58 123.595   3
   3   1  10 3103.00 134.946   4
  -1   3 -10 2937.55 100.957   3
   1   3  10 3176.01 140.159   1
   1   3  10 3184.23 123.907   3
   1   3 -10 2913.21 113.506   3
   3  -1  10 3076.76 87.4845   3
   3  -1  10 3193.83 140.099   1
   1   3  10 3215.68 125.302   4
   3   1  12 3727.68 168.445   1
  -3   1 -12 3699.09 115.650   3
   3   1  12 3798.22 124.444   3
  -3   1  12 3815.65 155.848   3
   1   3 -12 3862.59 145.080   3
   1   3  12 3674.81 168.742   1
  -3   1  12 3832.41 163.060   1
  -1  -3 -12 3936.35 158.940   3
  -3  -1  12 3748.79 163.241   1
  -3  -1  12 4012.35 155.659   3
   1   3  12 3851.60 152.612   4
  -1   3  12 3751.67 165.503   1
  -1  -3  12 3892.65 138.268   3
   3  -1  12 3770.89 170.090   1
   1   3  12 3899.46 147.780   3
  -1   3  12 3778.33 144.521   4
  -1   3 -12 3850.35 129.903   3
   3  -1  12 3929.51 111.650   3
  -1   3  12 3908.72 156.090   3
   3   1  14 1960.55 97.2513   3
  -3   1  14 2019.46 125.283   3
  -1   3  14 1943.22 124.814   3
   3  -1  14 2266.55 148.451   1
  -3  -1  14 2019.71 122.800   3
  -1   3 -14 2112.33 109.741   3
   3  -1  14 2011.21 88.9177   3
   1   3  14 1933.45 136.450   1
  -1   3  14 1892.10 133.426   1
  -3   1  14 2064.19 136.661   1
   3   1  14 2062.81 143.225   1
   1   3  14 2040.73 117.531   3
   1   3  16 1572.65 137.950   1
  -3   1  16 1710.22 130.709   3
  -3   1  16 1696.94 140.958   1
   1   3  16 1669.89 116.960   3
   3   1  16 1734.29 146.086   1
   3   1  16 1754.97 99.9580   3
   3  -1  16 2040.81 156.162   1
  -1   3  16 1917.92 150.017   1
  -3  -1  16 1856.34 128.171   3
  -1   3  16 1730.56 123.900   3
   1   3  18 2308.95 181.136   1
   3   1  18 2277.82 176.305   1
  -3  -1  18 2318.99 151.144   3
  -1   3  18 2182.65 172.945   1
  -1   3  18 2182.74 147.019   3
  -3   1  18 1838.92 142.961   3
   3  -2   1 115.858 31.7084   4
   2  -3  -1 122.349 36.8660   3
  -3   2   1 157.702 34.0581   3
  -2   3  -1 119.834 28.1823   3
  -3   2  -1 97.5131 21.7053   3
  -2   3   1 139.337 42.0212   2
   3  -2  -1 119.300 32.7242   3
   3  -2   1 167.321 35.0788   2
   3  -2   1 131.745 23.5276   3
  -2  -3  -1 103.385 24.3404   2
   2   3   1 100.752 24.0818   2
  -2   3   1 94.9778 35.4478   3
  -3   2  -1 109.344 34.3853   4
   3  -2  -1 120.976 23.0674   4
   3  -2  -3 29164.1 344.826   3
   3   2   3 28901.2 340.150   4
   3   2  -3 28656.5 336.079   3
   2  -3  -3 28543.4 349.251   3
  -3  -2  -3 28587.6 342.992   4
  -3   2  -3 28614.4 318.380   1
  -3   2   3 29042.8 341.730   3
  -2  -3  -3 29174.1 329.182   4
   3  -2   3 28862.0 343.445   4
   2   3   3 28418.2 322.932   4
  -2   3   3 28816.5 346.495   3
   2   3   5 20207.3 279.597   3
  -3  -2   5 20518.1 283.254   3
  -3   2   5 19787.2 291.215   3
  -3   2  -5 20279.3 284.864   1
   3   2   5 20621.1 260.089   3
  -2   3   5 20003.3 293.620   3
   3  -2  -5 20280.2 297.785   3
   2   3  -5 19403.6 274.316   3
  -2   3  -5 20443.4 290.739   1
   2  -3  -5 20358.8 300.475   3
   3  -2   5 19984.7 302.240   4
   3  -2   5 19897.3 284.257   1
   3   2  -5 20101.0 274.281   1
   3   2   5 20156.0 288.482   4
  -2   3  -5 19850.3 209.175   3
  -2   3   5 19732.3 216.694   4
  -3  -2  -5 19994.8 293.832   4
   2   3  -5 19849.9 287.264   1
   2   3   5 20510.4 275.541   4
  -2  -3  -5 20097.1 279.070   4
   3   2  -5 19990.3 284.542   3
   2   3   7 2821.09 103.267   3
  -2   3  -7 2905.47 115.618   1
  -3  -2   7 2958.29 108.205   3
   3  -2  -7 2883.72 114.952   3
   3  -2   7 3002.60 122.327   4
  -3  -2  -7 2637.26 112.019   4
   3  -2   7 2823.30 111.719   1
   3   2   7 2788.48 109.618   4
  -3   2  -7 2723.76 60.5931   3
  -3   2   7 2868.62 104.029   1
   2   3  -7 2701.52 100.433   3
   2  -3  -7 2969.14 117.776   3
  -2   3   7 2807.29 114.089   3
   2   3   7 2945.14 105.611   4
  -3   2  -7 2959.46 113.211   1
  -2   3   7 2725.14 81.7794   4
   2   3  -7 2886.67 112.942   1
  -2   3  -7 2763.97 72.1845   3
   3   2   7 2760.16 91.2832   3
   3   2  -7 2824.03 107.011   1
  -3   2   7 2753.48 112.724   3
   3   2  -7 2803.63 105.870   3
   3  -2   9 246.117 27.5331   3
   3   2   9 219.924 51.9256   1
   3   2   9 220.619 39.1664   3
  -3  -2   9 261.728 47.9919   3
   2   3   9 191.804 44.3145   4
  -3   2   9 158.809 47.8110   3
  -3   2   9 198.805 46.4745   1
   2  -3  -9 237.801 54.5485   3
  -2   3   9 230.821 39.1212   4
   2   3   9 238.787 46.3556   3
   3  -2  -9 419.392 56.7628   3
  -2   3   9 168.100 48.1177   1
   3   2   9 243.231 49.0021   4
  -2   3   9 286.271 55.5543   3
  -3   2  -9 348.691 31.0513   3
  -2   3  -9 237.530 30.2045   3
  -2   3  -9 160.829 46.5663   1
  -2  -3   9 203.851 42.9940   3
   2   3  -9 278.857 48.6343   3
   3  -2   9 264.594 58.1829   1
   3   2  -9 179.325 48.3976   1
   3   2  -9 216.887 45.9947   3
   3  -2   9 236.261 52.8938   4
   2   3  -9 146.466 48.5260   1
   2   3 -11 11322.9 252.688   3
  -3   2 -11 11310.1 193.815   3
  -2   3  11 11135.5 270.222   1
   2   3  11 11481.1 283.831   1
  -3   2  11 11311.1 266.147   1
   3   2 -11 11579.2 264.059   3
   3   2  11 11306.8 281.018   1
  -2  -3  11 11524.3 245.559   3
   3   2  11 11410.6 225.281   3
   2   3  11 11338.9 242.379   3
   2   3  11 11895.2 267.059   4
   3  -2  11 11822.7 288.847   1
   3  -2  11 11840.1 184.773   3
  -2   3  11 11251.0 236.215   4
  -2   3  11 11289.0 265.586   3
  -3   2  11 11311.8 266.546   3
  -2   3 -11 11243.3 205.634   3
  -3  -2  11 11088.5 252.308   3
   3   2  13 3492.26 171.877   1
  -2   3  13 3455.49 165.660   1
   3   2  13 3510.34 130.799   3
  -3   2 -13 3499.79 114.453   3
  -3  -2  13 3589.36 153.560   3
  -2   3  13 3879.71 150.360   4
  -2  -3  13 3408.07 142.823   3
  -3   2  13 3640.65 159.985   3
   2   3  13 3574.66 174.489   1
   3  -2  13 3540.96 174.122   1
   2   3  13 3729.75 146.864   3
  -2   3  13 3740.16 163.914   3
  -3   2  13 3665.83 150.381   4
  -2   3 -13 3522.68 123.928   3
  -3   2  13 3488.51 162.545   1
   3  -2  13 3897.66 112.090   3
   3   2  15 703.149 99.4281   1
   2   3  15 552.164 90.4789   1
  -3  -2  15 591.214 80.7113   3
  -2   3  15 697.419 95.5330   1
  -3   2  15 517.953 90.5924   1
   3   2  15 674.839 68.0563   3
  -2   3  15 642.099 84.9163   3
  -3   2  15 561.369 83.8629   3
   2   3  15 502.428 68.4640   3
   3  -2  15 667.571 98.5601   1
  -3   2  17 427.584 98.1519   1
   2   3  17 380.007 70.1281   3
   2   3  17 368.480 93.9238   1
  -2   3  17 448.522 98.4102   1
  -2   3  17 430.584 83.0871   3
  -3   2  17 373.440 82.7986   3
  -3  -2  17 318.920 73.4735   3
   3   2  17 272.017 84.9980   1
  -2   3  19 2544.35 168.129   3
  -3   2  19 2342.66 163.848   3
  -3   3   0 154419. 1260.92   3
   3  -3   0 160820. 1310.05   2
   3  -3   0 151404. 1264.42   3
  -3   3   0 152137. 1300.12   2
   3  -3   0 149431. 1233.77   4
   3  -3   2 31430.5 355.372   4
   3   3   2 31606.3 296.837   2
  -3   3  -2 32381.3 303.943   3
  -3  -3  -2 32167.2 364.427   4
  -3   3   2 32087.7 364.207   3
   3  -3  -2 31349.1 365.609   3
   3  -3  -4 202222. 1728.43   3
   3   3  -4 204252. 1704.15   3
   3   3   4 200913. 1701.71   4
   3  -3   4 203805. 1724.41   4
  -3   3   4 200229. 1720.85   3
  -3  -3  -4 205272. 1710.84   4
  -3   3  -4 205103. 1698.43   1
  -3   3   6 236.466 48.8897   3
  -3  -3  -6 244.261 48.6308   4
   3   3   6 231.985 40.9103   3
  -3   3  -6 287.182 19.2738   3
   3   3   6 317.897 46.4047   4
  -3   3  -6 420.602 50.8620   1
   3   3  -6 352.516 48.5273   1
   3   3  -6 239.907 42.7768   3
   3  -3  -6 326.881 51.9146   3
   3   3   8 43122.5 527.864   4
  -3   3  -8 41361.1 396.584   3
   3  -3   8 42598.8 562.152   4
   3   3   8 40619.5 490.767   3
   3  -3  -8 42682.9 552.749   3
  -3   3   8 41288.5 534.543   3
  -3   3   8 40817.5 507.534   1
  -3  -3   8 41835.5 510.639   3
   3   3  -8 41916.5 530.897   1
  -3   3  -8 42894.7 545.990   1
   3   3  -8 42147.0 518.552   3
   3   3  10 34498.9 447.918   3
  -3  -3  10 34900.5 474.966   3
   3   3 -10 34549.0 484.813   3
   3   3  10 33382.3 507.898   1
  -3   3 -10 33362.0 369.021   3
  -3   3  10 33711.1 497.285   3
   3   3  10 35096.5 495.125   4
  -3   3  10 33108.2 482.326   1
   3   3  12 56504.7 666.290   3
   3   3  12 57829.2 768.613   1
  -3   3  12 56466.3 733.561   1
  -3   3 -12 56961.8 589.432   3
  -3  -3  12 57455.9 702.845   3
  -3   3  12 59542.2 675.470   4
  -3   3  12 56515.7 734.891   3
   3   3  14 3379.27 176.952   1
  -3   3  14 3078.56 159.744   3
  -3  -3  14 3252.11 149.227   3
  -3   3  14 3410.38 169.935   1
   3   3  14 2733.85 127.358   3
  -3   3  16 3105.23 180.473   1
   3   3  16 3154.99 187.434   1
  -3   3  16 2931.07 166.397   3
   3   3  16 3303.85 147.361   3
  -3   3  18 12805.2 395.878   1
  -3   3  18 11849.3 350.616   3
  -4   0   0 62085.7 553.428   3
  -4   0   0 61487.4 574.792   4
   0  -4   0 60445.2 581.847   2
   4   0   0 60795.6 551.046   3
  -4   0   0 61464.2 532.964   2
   4   0  -2 50.7711 16.3875   1
   4   0   2 22.3582 18.6513   3
  -4   0   2 44.9170 35.0059   3
   4   0  -2 78.2118 36.8606   3
  -4   0  -2 53.3880 41.2647   4
   0   4   2 82.9627 43.0202   2
  -4   0   4 124884. 1124.72   3
   0   4   4 125874. 1042.05   4
   4   0  -4 127089. 1057.65   1
   0   4   4 127347. 1140.84   3
  -4   0  -4 127665. 1145.06   4
   0  -4  -4 126239. 1046.83   4
   4   0   4 125173. 1138.61   4
   4   0  -4 129112. 1128.33   3
   4   0   4 127054. 1097.22   1
  -4   0  -6 7002.07 181.608   4
   0   4  -6 7113.47 141.627   3
  -4   0   6 7165.07 171.313   3
   4   0   6 7049.41 104.814   3
   0   4  -6 7223.26 176.728   1
   4   0   6 7318.77 168.129   1
   0   4   6 7416.13 136.376   4
   4   0  -6 7320.59 175.403   3
  -4   0   6 7158.80 151.193   1
   0  -4  -6 7405.64 179.686   3
   4   0   6 7582.32 183.059   4
   0   4   6 6990.34 173.556   3
   4   0  -8 49281.3 592.171   3
   0   4  -8 47111.9 519.682   3
  -4   0   8 47727.3 581.700   3
   4   0   8 49721.4 613.949   4
   0   4  -8 49969.7 608.164   1
   0   4   8 47467.7 580.519   3
   4   0   8 48260.4 458.176   3
   4   0   8 49371.9 588.879   1
   0   4   8 48651.2 525.382   4
   0  -4  -8 49074.5 597.705   3
  -4   0   8 47873.4 558.252   1
   0  -4 -10 12904.5 282.682   3
  -4   0  10 12421.9 270.965   3
   0   4  10 12616.7 240.287   4
   4   0  10 12304.3 279.833   1
   4   0 -10 12670.9 278.328   3
  -4   0  10 12252.4 264.514   1
   0   4 -10 11970.3 230.788   3
   4   0  10 12567.4 190.363   3
   0   4  10 12229.0 268.400   3
   4   0  12 27341.4 342.257   3
  -4   0  12 27261.2 454.082   3
  -4   0  12 26750.8 455.065   1
   0   4  12 27076.7 475.364   1
   0   4  12 27075.2 448.242   3
   4   0  12 26900.8 475.017   1
   0   4 -12 27037.3 401.487   3
   0   4  12 27318.0 420.340   4
   0   4 -14 11182.4 261.272   3
   4   0  14 11116.6 209.436   3
   0   4  14 10788.1 312.188   1
   4   0  14 11400.2 322.328   1
   0   4  14 10685.0 285.099   3
  -4   0  14 11234.5 293.753   3
  -4   0  14 11152.9 306.138   1
  -4   0  16 5629.51 223.102   3
   4   0  16 5620.48 248.236   1
   0   4  16 5676.42 248.561   1
   0   4  16 5659.93 216.746   3
  -4   0  18 8077.01 283.453   3
   0   4  18 8019.14 270.762   3
   0   4  18 8382.31 324.074   1
  -4  -1  -1 51388.8 509.453   4
   4  -1   1 51668.4 474.236   2
  -4   1  -1 51036.2 447.865   3
  -4   1   1 50107.5 471.964   4
  -1   4   1 49933.0 508.594   3
   1   4   1 49125.2 486.838   2
  -4   1  -1 50520.2 496.762   4
  -1  -4  -1 49765.0 490.443   2
  -1   4   1 49784.6 517.218   2
   4  -1   1 49586.2 498.450   4
   4   1  -1 50561.5 490.538   3
   4  -1  -1 50309.7 488.361   3
  -4   1   1 51251.9 486.046   3
   4  -1   1 50672.5 431.621   1
   1  -4  -1 50276.4 519.368   2
   4  -1   1 49975.3 448.171   3
   4   1  -3 20782.6 231.476   1
   1  -4  -3 20246.7 193.320   4
  -1   4   3 20471.9 286.909   3
  -4  -1   3 20399.7 273.352   3
  -4   1   3 20246.0 211.868   1
   1  -4  -3 19383.8 284.145   3
   4  -1   3 19891.7 280.127   4
   4   1   3 20750.1 284.551   4
  -4   1   3 20421.4 274.575   3
  -4  -1  -3 20640.5 286.527   4
  -4   1  -3 20098.4 281.833   4
   4  -1  -3 20192.0 275.353   3
   4  -1   3 20176.7 245.381   1
   4   1  -3 20068.1 273.271   3
  -1  -4  -3 20012.0 241.348   4
   4  -1   5 6791.23 167.457   4
   4  -1  -5 6588.89 160.152   3
   1   4   5 6778.65 161.449   3
   4   1   5 7057.08 120.784   3
   4   1  -5 6959.68 160.483   3
  -1   4   5 6780.50 165.020   3
   1  -4  -5 6597.09 165.542   3
  -4  -1  -5 6823.01 167.286   4
   1   4  -5 6699.83 141.906   3
  -1  -4  -5 6768.64 136.788   4
   4   1  -5 6859.03 136.837   1
  -1   4   5 6975.95 108.956   4
   1   4   5 6873.06 133.729   4
  -4   1   5 6738.80 161.502   3
  -1   4  -5 6809.08 121.754   3
  -1   4  -5 6880.84 163.851   1
  -4  -1   5 6871.45 159.782   3
  -4   1   5 6954.32 131.798   1
   4  -1   5 6623.07 149.164   1
   4   1   5 6892.85 164.904   4
   1   4  -7 39723.4 456.251   3
   4  -1  -7 39818.4 504.076   3
   1   4  -7 40063.6 508.118   1
   4  -1   7 40052.9 492.688   1
  -1   4  -7 38915.7 416.949   3
   1   4   7 39790.0 493.290   3
  -4   1   7 39402.0 459.921   1
   4   1  -7 39393.5 467.912   1
  -4  -1   7 39709.9 492.755   3
  -4  -1  -7 39683.3 513.635   4
   4   1  -7 39536.1 498.707   3
   4   1   7 39455.3 407.109   3
  -1   4   7 39189.6 500.442   3
   4  -1   7 39747.2 347.221   3
   1  -4  -7 39828.4 512.258   3
  -4   1   7 39633.4 496.806   3
   1   4   7 39989.0 451.125   4
  -1   4  -7 40229.8 510.436   1
   4   1   7 40416.5 514.042   4
  -1   4   7 39495.6 415.975   4
   4  -1   7 39433.7 518.670   4
   4   1   7 39408.7 490.920   1
   4   1  -9 3571.75 138.842   3
   4  -1   9 3513.47 138.027   1
   1   4  -9 3534.48 120.068   3
   1  -4  -9 3438.62 142.677   3
   1   4   9 3185.89 128.174   3
  -4  -1   9 3484.67 134.140   3
  -1   4  -9 3375.57 140.374   1
  -1  -4  -9 3465.73 135.686   3
  -1   4   9 3334.69 134.257   3
   4   1   9 3532.41 141.377   4
  -4   1   9 3488.78 136.705   3
   1   4   9 3402.69 119.071   4
  -1   4   9 3333.79 107.605   4
   4  -1   9 3458.39 75.2736   3
   4  -1   9 3607.49 149.362   4
   1   4  -9 3954.37 150.662   1
  -1   4  -9 3548.28 104.632   3
   4   1   9 3254.89 133.744   1
   4   1   9 3408.47 95.5544   3
  -4   1   9 3252.96 123.392   1
   4  -1  -9 3423.92 137.930   3
   4  -1  11 11524.6 285.878   1
  -1  -4 -11 11781.9 274.135   3
  -4   1  11 11471.6 266.177   1
   4  -1  11 11979.5 178.353   3
  -1   4  11 11563.5 280.238   1
  -1   4 -11 11563.7 221.516   3
   1   4  11 11997.7 256.651   4
   1   4  11 11776.1 264.528   3
  -4   1  11 11359.5 271.283   3
   1   4  11 11530.8 285.227   1
  -1   4  11 11697.5 273.776   3
  -1   4  11 11557.4 235.096   4
   4   1  11 11819.4 207.844   3
   1   4 -11 11345.7 243.566   3
   4   1  11 11250.3 280.993   1
  -4  -1  11 11794.5 270.214   3
   4   1  13 874.985 65.2710   3
  -1   4  13 855.642 76.1768   4
  -4   1  13 859.015 91.2507   1
   1   4 -13 730.644 73.1581   3
   1   4  13 740.796 91.7963   1
   4  -1  13 821.263 52.0420   3
  -4   1  13 683.309 85.4027   3
  -1   4 -13 771.208 66.2421   3
   4  -1  13 851.169 97.3900   1
   4   1  13 724.194 89.5411   1
   1   4  13 851.293 82.7744   3
  -1   4  13 818.231 93.6192   1
  -4  -1  13 814.754 84.5174   3
  -1   4  13 904.504 92.2329   3
  -4   1  15 7838.93 257.370   3
   4   1  15 7824.23 279.994   1
  -1   4  15 7555.69 249.697   3
   4   1  15 7972.50 190.850   3
  -4  -1  15 7787.97 250.602   3
  -4   1  15 7677.17 264.672   1
  -1   4  15 7434.93 267.215   1
   1   4  15 7486.62 272.369   1
   4  -1  15 7978.18 280.968   1
   1   4  15 7676.72 238.806   3
   1   4  17 107.832 76.9902   1
   1   4  17-3.69472 58.0292   3
   4  -1  17 119.344 78.5477   1
   4   1  17 69.2632 71.4869   1
  -1   4  17 83.7994 72.4662   1
  -4  -1  17 107.533 67.1268   3
  -1   4  17 76.6441 61.5623   3
  -4   1  17 115.489 67.5057   3
  -1   4  19 913.519 113.933   3
  -4   1  19 831.634 112.239   3
  -4  -1  19 1006.86 115.331   3
  -2   4   0 8416.65 147.333   3
  -4   2   0 8177.22 131.849   3
  -4   2   0 7528.44 144.353   2
   4  -2   0 7927.48 130.035   3
   2  -4   0 8219.10 163.077   2
  -2   4   0 7916.06 158.468   2
   4  -2   0 7988.83 133.265   4
  -4   2   0 7942.58 131.183   4
  -4  -2  -2 15103.7 232.501   4
  -4   2  -2 15479.6 224.982   4
   4  -2   2 14858.8 161.968   3
  -4   2   2 15491.4 223.798   3
  -4   2   2 15352.5 177.564   4
   4  -2  -2 15284.3 222.218   3
   4   2  -2 15025.7 220.840   3
  -4   2  -2 15137.4 159.998   3
   4  -2   2 15045.2 222.830   4
  -2   4   2 15485.9 233.738   3
   2   4   2 14925.0 200.496   2
  -4   2  -2 14676.1 186.684   1
  -2   4   2 14777.6 236.422   2
   2  -4  -2 15166.3 232.708   3
   4   2   4 65073.0 661.378   4
  -4  -2   4 63417.6 647.222   3
   2  -4  -4 64600.1 672.604   3
  -2   4   4 62898.9 662.143   3
  -4   2   4 64103.0 657.659   3
   4  -2   4 64045.7 663.232   4
   4  -2   4 63429.2 623.534   1
   4  -2  -4 64970.5 660.081   3
  -4   2  -4 64199.9 623.387   1
  -4  -2  -4 65042.5 667.027   4
   2  -4  -6 6357.10 170.749   3
   4   2  -6 5919.87 144.238   1
  -4  -2  -6 5931.98 165.379   4
   4   2   6 5950.07 128.917   3
  -2   4  -6 6386.94 164.421   1
  -4   2   6 5809.47 158.887   3
  -4   2  -6 6129.20 153.091   1
  -2  -4  -6 5884.84 145.628   4
  -2   4   6 5747.08 161.975   3
   4   2   6 6063.34 160.151   4
   4  -2   6 6372.60 172.333   4
   2   4   6 6092.59 142.506   4
   2   4  -6 6140.85 162.010   1
   2   4  -6 5742.00 145.126   3
   4   2  -6 6079.54 157.404   3
   4  -2  -6 5979.07 161.232   3
   4  -2   6 6136.25 155.551   1
  -4   2   6 6033.99 136.288   1
  -2   4   6 5940.50 102.020   4
  -2   4  -6 5816.87 105.915   3
  -4  -2   6 5828.84 154.341   3
   2   4   6 6091.94 157.644   3
   4  -2   8 1321.29 92.2834   4
   4   2   8 1258.13 63.9382   3
  -2   4  -8 1217.20 85.6398   1
   4   2  -8 1215.81 77.8587   1
  -4  -2   8 1180.51 81.2209   3
   2  -4  -8 1265.30 89.0771   3
  -4   2   8 1274.40 87.6042   3
   2   4  -8 1248.56 76.6465   3
   4   2  -8 1279.91 81.6508   3
  -2   4   8 1223.05 58.8558   4
  -4   2   8 1183.23 74.4818   1
   2   4  -8 1320.06 87.1539   1
   4  -2  -8 1152.94 82.7603   3
   2   4   8 1239.76 81.2279   3
  -2   4   8 1208.23 86.2399   3
  -2   4  -8 1283.58 54.4571   3
   4  -2   8 1274.06 84.0342   1
   4   2   8 1240.33 82.1665   4
   2   4   8 1189.14 73.5955   4
   2   4  10 9612.70 227.701   3
  -2   4 -10 9863.41 179.018   3
  -4   2  10 9383.98 226.759   1
   4   2  10 9737.77 249.676   1
  -2   4  10 9759.66 244.957   3
  -2   4  10 9798.01 242.823   1
  -4   2  10 9686.10 243.983   3
   4   2  10 10100.1 194.514   3
  -4  -2  10 9616.18 235.173   3
   2   4  10 9918.93 229.549   4
   4   2  10 10135.2 251.694   4
   4   2 -10 9951.48 241.980   3
  -2   4  10 9618.91 194.973   4
   2   4 -10 9940.77 226.132   3
   4   2 -10 10055.5 241.596   1
   4  -2  10 9973.99 252.610   1
  -4   2  12 12957.8 301.139   1
  -2   4  12 13348.1 261.740   4
   2   4 -12 13544.1 290.478   3
   4  -2  12 13468.5 325.848   1
   2   4  12 13250.8 287.090   3
   2   4  12 13533.2 326.788   1
   4   2  12 13484.9 248.570   3
  -4   2  12 13087.3 307.617   3
  -4  -2  12 13918.6 305.971   3
  -2   4 -12 13711.0 240.153   3
  -2   4  12 13499.7 317.188   1
  -2   4  12 13740.7 315.502   3
   4   2  12 13204.2 323.713   1
   4  -2  14 262.136 77.3526   1
  -4   2  14 227.122 70.7263   1
   2   4  14 115.979 62.9888   1
   2   4  14 195.697 58.9193   3
  -4   2  14 174.153 68.3841   3
  -2   4  14 239.915 66.5560   3
  -4  -2  14 237.196 65.9292   3
   4   2  14 229.022 44.7517   3
   4   2  14 164.331 67.4691   1
  -2   4  14 269.621 77.6661   1
  -2   4  16-6.67839 69.3227   3
  -2   4  16 48.5267 63.8378   1
   2   4  16 49.6082 53.0518   3
   4   2  16 157.352 79.3133   1
  -4  -2  16 135.278 63.5755   3
  -4   2  16-3.01146 67.6157   1
  -4   2  16 41.7710 62.8851   3
   2   4  16-17.6346 69.7197   1
  -2   4  18 2936.92 180.404   3
  -4   2  18 2800.02 192.893   1
  -2   4  18 3086.50 198.904   1
  -4   2  18 2698.01 175.968   3
  -3   4   1 24631.3 330.711   2
   3  -4  -1 24629.2 309.094   3
  -4   3  -1 24141.7 266.877   3
   4  -3   1 23814.0 289.151   4
   4  -3  -1 24623.0 300.075   3
   4  -3   1 23947.6 268.928   3
  -4   3   1 25058.2 322.695   2
  -4   3   1 24357.1 253.244   4
  -3   4   1 24735.1 307.722   3
   4  -3  -1 24114.0 256.572   4
  -4   3   1 24854.7 298.158   3
   3  -4   1 24082.4 319.353   2
   3  -4  -1 24352.9 237.304   4
  -4   3  -1 24583.1 287.596   4
  -3  -4  -1 23903.8 257.695   2
  -3   4  -1 25131.8 283.044   3
   4  -3   1 24078.6 308.896   2
  -4   3   3 215867. 1679.38   4
  -4   3   3 215426. 1807.39   3
   4  -3  -3 218801. 1813.24   3
  -4  -3  -3 210182. 1812.91   4
  -3  -4  -3 212233. 1794.67   4
  -3   4  -3 214798. 1708.67   3
   4  -3   3 214223. 1806.13   4
   4   3  -3 213511. 1800.67   3
  -4   3  -3 215888. 1763.42   1
   3  -4  -3 216330. 1821.94   3
  -3   4   3 217451. 1816.41   3
  -4   3  -3 215433. 1674.37   3
  -3  -4  -5 110675. 1040.17   4
  -3   4   5 112002. 889.936   4
   3   4   5 115481. 1039.87   3
   3  -4  -5 109762. 1072.76   3
  -4  -3  -5 112328. 1062.31   4
   3   4   5 111307. 1030.02   4
   4  -3  -5 113883. 1072.71   3
  -4   3  -5 112629. 1032.53   1
   4  -3   5 112819. 1071.82   4
  -3   4  -5 112443. 1046.12   1
  -4   3   5 112502. 1064.02   3
  -3   4   5 111437. 1064.14   3
   4   3   5 114789. 1056.73   4
   4   3  -5 111719. 1049.45   3
   3   4  -7 42544.6 527.456   1
  -3  -4  -7 41607.2 513.952   4
   4   3   7 41410.8 484.604   3
  -4   3   7 40096.4 478.624   1
  -4   3   7 40975.6 533.849   3
   3   4   7 42087.3 505.971   4
   4  -3  -7 43395.2 546.814   3
   4   3  -7 41508.7 507.942   1
   3  -4  -7 42790.8 550.472   3
   4   3  -7 42207.2 521.618   3
  -3   4  -7 42543.8 531.631   1
  -4   3  -7 42679.2 526.380   1
  -4  -3   7 41562.9 512.092   3
  -3   4  -7 41281.4 388.212   3
   4   3   7 42477.9 528.127   4
  -3   4   7 41161.1 535.093   3
   4  -3   7 42743.9 554.780   4
  -3   4   7 41155.5 408.424   4
   3   4   7 41312.3 506.419   3
  -4  -3  -7 41679.9 533.542   4
   3   4  -7 42080.0 511.206   3
   3   4  -9 86.3336 47.4255   1
   3   4   9 110.068 44.1682   3
  -4   3   9 96.2535 41.5599   1
   3   4  -9 129.361 42.1977   3
   4   3   9 99.9854 45.3227   4
  -3   4   9 269.931 36.1979   4
   4   3  -9 84.6347 41.5522   1
   3   4   9 140.390 44.9744   4
   3  -4  -9 665.474 75.1950   3
   4   3  -9 77.9730 53.1827   3
   4   3   9 66.0893 34.2090   3
  -4  -3   9 118.852 45.0245   3
   4  -3  -9 67.7928 42.6443   3
  -3   4  -9 130.109 22.6867   3
  -4   3  -9 100.136 15.9491   3
  -4   3   9 99.4649 48.8826   3
  -3   4   9 112.698 50.7561   3
  -4   3  11 93716.5 1019.52   1
  -4  -3  11 96769.9 1023.15   3
  -3   4  11 96295.1 1059.51   3
   4   3  11 95986.6 955.332   3
  -4   3  11 95296.6 1056.17   3
  -3   4 -11 95184.5 867.318   3
   3   4  11 95512.7 993.132   3
   3   4 -11 97458.0 1024.33   3
   4   3  11 95379.7 1064.97   1
  -3   4  11 95346.9 930.853   4
  -3   4  11 95738.8 1038.55   1
   3   4  11 99380.9 1034.43   4
  -4   3 -11 96123.4 825.197   3
   4   3  13 14218.6 357.018   1
  -3   4  13 14940.8 285.495   4
  -4   3  13 14715.4 292.918   4
   3   4  13 14266.2 352.819   1
  -3   4 -13 14251.5 234.027   3
  -3   4  13 14453.8 341.164   3
   4   3  13 14499.7 280.482   3
  -4  -3  13 14320.8 320.636   3
  -4   3  13 14101.6 331.997   1
   3   4  13 14585.6 303.821   3
  -4   3  13 14096.5 339.627   3
  -3   4  13 14090.4 339.146   1
  -4   3  15 13916.1 360.213   1
   4   3  15 14685.9 297.150   3
  -3   4  15 13988.4 358.331   3
   4   3  15 14540.7 384.798   1
  -4   3  15 14066.4 358.072   3
   3   4  15 14641.8 388.563   1
   3   4  15 14648.4 321.667   3
  -3   4  15 14058.2 368.373   1
  -4   3  17 2254.84 164.793   1
  -4   3  17 2547.82 167.987   3
  -3   4  17 2223.95 168.024   1
  -3   4  17 2228.84 156.929   3
   4   3  17 2677.19 181.615   1
   3   4  17 2341.46 174.203   1
  -4   3  19 22142.6 511.312   3
  -3   4  19 22564.1 514.650   3
  -4   4   0 111935. 984.204   3
  -4   4   0 112960. 1036.77   2
   4  -4   0 112012. 990.193   3
   4  -4   0 113011. 1039.67   2
   4  -4   0 111938. 952.781   4
  -4   4   2 54982.5 576.839   3
   4  -4  -2 54057.8 580.072   3
   4  -4   2 55923.7 563.047   4
   4  -4   2 54738.1 581.772   2
  -4   4   2 54896.5 599.168   2
  -4   4  -2 55574.0 512.323   3
   4  -4   4 348292. 2847.27   4
  -4   4  -4 347135. 2686.84   3
   4   4  -4 349007. 2832.25   3
   4  -4  -4 350385. 2859.94   3
  -4  -4  -4 346378. 2840.80   4
  -4   4   4 348925. 2851.99   3
  -4   4  -4 343341. 2809.91   1
   4  -4   6 369.439 56.6392   4
   4   4  -6 238.951 44.5770   3
   4   4   6 202.709 43.0460   4
  -4   4  -6 209.003 46.2828   1
   4   4   6 210.070 46.5335   3
   4  -4  -6 226.914 52.5660   3
  -4   4   6 169.673 49.8235   3
  -4  -4  -6 291.788 55.5033   4
   4   4  -8 45572.2 572.837   1
   4   4   8 45401.8 546.842   3
  -4  -4  -8 45001.3 580.480   4
   4  -4  -8 46358.0 606.682   3
   4   4  -8 46389.6 574.613   3
   4  -4   8 45550.4 608.408   4
  -4   4   8 44529.5 588.837   3
   4   4   8 45328.6 568.448   4
  -4   4  -8 44134.2 383.323   3
  -4   4  -8 46713.4 588.660   1
  -4   4 -10 72066.7 618.106   3
  -4   4  10 72148.6 712.476   4
  -4   4  10 70464.8 852.167   3
   4   4  10 74168.4 837.987   4
   4   4  10 71449.8 784.367   3
  -4   4  10 70836.9 809.010   1
  -4   4  12 81673.0 834.752   4
  -4   4 -12 81681.8 720.491   3
  -4   4  12 80681.5 969.449   3
   4   4  12 81725.7 984.706   1
   4   4  12 81076.4 882.818   3
  -4   4  12 81258.2 943.691   1
  -4   4  14 4147.49 190.972   1
   4   4  14 4260.55 162.173   3
   4   4  14 4483.25 207.459   1
  -4   4  14 4493.66 200.186   3
   4   4  16 3035.99 143.308   3
   4   4  16 3000.42 190.785   1
  -4   4  16 3098.31 182.826   3
  -4   4  16 3061.68 182.194   1
  -4   4  18 23046.6 531.690   1
  -4   4  18 22613.2 515.643   3
  -5   0  -1 2764.91 95.7328   4
   5   0   1 3275.06 101.812   4
   5   0  -1 2859.99 86.6789   3
  -5   0   1 2878.54 86.8560   3
   0   5   1 2821.86 95.4589   2
   5   0   1 2839.77 73.9713   3
   0  -5  -1 3094.73 101.277   2
   5   0   3 44135.0 501.911   4
   5   0  -3 44318.3 396.317   1
   5   0  -3 44662.1 486.946   3
   0   5   3 42189.3 500.722   3
   5   0   3 43762.7 397.416   3
   0  -5  -3 43696.4 415.211   4
   5   0   3 44319.5 439.643   1
  -5   0   3 43926.5 483.393   3
  -5   0  -3 43180.2 498.420   4
   0  -5  -5 1409.10 56.5940   4
   5   0   5 1337.74 82.5483   4
  -5   0  -5 1285.76 85.3644   4
   5   0  -5 1522.92 60.1206   1
  -5   0   5 1317.24 80.6631   3
   5   0   5 1389.24 71.8284   1
   0   5   5 1330.99 85.0037   3
   5   0  -5 1460.93 80.7882   3
   0   5   7 2549.92 83.0121   4
  -5   0   7 2409.12 110.930   3
   0   5  -7 2630.37 115.398   1
   0   5   7 2489.17 115.834   3
   5   0   7 2524.57 58.9843   3
   0   5  -7 2522.63 90.2386   3
   5   0   7 2617.82 108.208   1
   5   0   7 2555.16 118.510   4
   5   0  -7 2582.40 114.300   3
  -5   0   7 2566.38 95.8148   1
   5   0   9 981.370 42.6195   3
   5   0   9 1082.88 82.5586   1
   0   5   9 875.754 79.3282   3
   0   5  -9 1009.58 64.5879   3
   0  -5  -9 1007.32 91.7471   3
   5   0  -9 996.076 83.6748   3
   0   5   9 892.209 61.3789   4
  -5   0   9 971.805 73.4205   1
  -5   0   9 943.141 81.2673   3
   5   0  11 8816.23 149.755   3
   0   5 -11 8268.54 196.726   3
   5   0  11 8358.09 241.541   1
   0   5  11 8488.81 201.199   4
   0   5  11 8269.02 234.694   3
  -5   0  11 8436.90 236.554   3
  -5   0  11 8562.21 228.018   1
   0   5 -13-2.51872 41.2075   3
  -5   0  13 55.3042 58.0710   3
   0   5  13-25.7797 67.8162   1
   0   5  13-35.1687 42.1748   4
   0   5  13 85.6860 56.1413   3
   5   0  13 39.1111 52.6631   1
   5   0  13 23.2845 24.4948   3
  -5   0  15 709.191 92.2228   3
   0   5  15 648.458 91.1163   3
   0   5  15 617.892 98.5698   1
   5   0  15 684.739 104.274   1
   0   5  17 484.194 99.5339   1
  -5   0  17 665.377 100.037   3
   0   5  17 765.549 100.457   3
   5   0  17 774.482 116.981   1
  -5   0  19 1306.86 131.600   3
  -5  -1   0 5229.50 128.585   4
   5   1   0 4881.72 109.326   3
  -5   1   0 4979.24 104.798   3
  -5   1   0 5066.57 116.775   4
  -5   1   0 4743.79 107.393   2
  -1  -5   0 4718.31 115.153   2
   5  -1   0 4966.85 106.019   3
   1  -5   0 4885.93 129.714   2
   5   1   2 532.731 55.1003   4
   1   5   2 441.121 49.1888   2
   5  -1   2 443.495 39.6302   2
  -5  -1  -2 475.332 60.9261   4
  -1   5   2 540.511 58.7561   2
   5   1  -2 447.625 48.5392   3
   5  -1   2 538.091 51.2178   4
   5   1   2 420.150 23.1221   2
   5  -1  -2 499.258 48.0488   3
  -5   1  -2 455.497 54.3519   4
   5  -1   2 520.984 31.5344   3
  -5   1   2 430.375 46.0701   3
   5  -1   2 420.019 31.8472   1
  -5  -1   2 471.079 49.3178   3
  -1   5   2 406.163 54.3772   3
  -5   1   4 200.027 45.7483   3
   5  -1   4 228.114 44.6328   4
   5   1  -4 327.113 48.2398   3
  -1  -5  -4 232.595 33.9786   4
  -5  -1   4 328.103 51.9657   3
   5  -1  -4 215.290 44.6281   3
  -5   1   4 227.310 27.3256   1
   5   1  -4 215.967 31.1457   1
  -5   1  -4 186.963 51.2615   4
   1   5   4 274.025 52.2038   3
  -1   5   4 283.953 52.4794   3
   1  -5  -4 345.453 24.9627   4
   5  -1   4 206.942 37.7298   1
  -5  -1  -4 214.370 54.2855   4
  -1  -5  -6 112.716 32.6508   4
   5  -1   6 115.024 40.8628   1
  -1   5  -6 133.244 28.3552   3
   1   5   6 222.348 35.3771   4
   1  -5  -6 180.151 47.1060   3
   1   5  -6 74.0269 30.8299   3
  -5   1   6 202.548 34.4568   1
   1   5   6 120.537 48.8414   3
  -5  -1   6 146.525 48.2046   3
   5   1  -6 145.219 35.8170   1
  -1   5   6 120.211 24.1743   4
   5   1   6 223.774 30.4040   3
   5   1   6 94.6663 38.5982   1
   5  -1  -6 112.908 40.8954   3
  -5   1   6 111.015 46.0561   3
  -1   5   6 124.746 48.1728   3
   5   1   6 122.767 43.7514   4
  -5  -1  -6 150.909 51.3152   4
   5   1  -6 232.029 46.2314   3
   5  -1   6 99.4007 43.6749   4
  -1   5  -6 142.974 45.0011   1
   1   5  -8 1576.16 80.0104   3
   1   5   8 1823.05 82.8425   4
  -1   5  -8 1765.38 101.848   1
   5   1   8 1681.75 94.6899   1
   1   5  -8 2580.24 121.007   1
   1   5   8 1721.98 100.711   3
  -1   5   8 2283.96 114.771   3
   1  -5  -8 1775.03 102.918   3
   5  -1   8 1769.56 96.9496   1
  -1   5  -8 1598.74 69.9672   3
  -5   1   8 1781.53 101.269   3
  -5   1   8 1625.56 82.9462   1
   5   1  -8 1728.43 86.5822   1
   5  -1  -8 1834.35 101.885   3
   5  -1   8 1918.12 109.195   4
  -1   5   8 1605.93 66.4288   4
   5   1  -8 1862.41 101.108   3
   5   1   8 1849.49 106.035   4
   5  -1   8 1597.37 34.8736   3
  -5  -1   8 1602.14 95.1451   3
   5   1   8 1748.73 64.8144   3
   1   5  10 774.636 65.6973   4
   5   1  10 750.456 73.4729   1
   5  -1  10 858.922 35.2571   3
   1   5 -10 706.776 62.4336   3
  -1   5  10 767.835 80.5327   3
   5  -1  10 788.061 78.3078   1
   5   1  10 773.593 45.8390   3
  -5   1  10 831.500 73.8976   1
  -5   1  10 857.393 83.0385   3
  -5  -1  10 757.992 76.6023   3
   1   5  10 798.523 78.8999   3
  -1   5  10 840.131 59.7486   4
  -1   5 -10 776.799 56.6281   3
  -1   5  12-33.0518 44.9972   4
   5   1  12 75.3854 27.9368   3
   5  -1  12 100.532 24.8817   3
  -1   5 -12 39.3556 31.6688   3
  -1   5  12 99.9272 62.4009   1
   5  -1  12 45.2388 55.2692   1
  -5  -1  12 25.2141 47.7745   3
   5   1  12 74.0255 53.2795   1
   1   5  12 113.057 55.2545   3
  -5   1  12-33.9587 55.1293   1
  -5   1  12 91.4432 54.3959   3
   1   5 -12 47.0214 42.1762   3
  -1   5  12 59.7289 53.6362   3
   1   5  12 26.2085 40.3115   4
   1   5  14 424.862 73.5315   3
   1   5  14 361.875 79.9141   1
   5   1  14 470.300 51.1866   3
  -5   1  14 357.336 74.8477   3
  -1   5  14 320.678 77.3559   1
  -1   5  14 498.567 81.5565   3
   5  -1  14 380.428 80.2239   1
  -5   1  14 304.429 69.1223   1
   5   1  14 278.523 73.7318   1
  -5  -1  14 356.432 75.3839   3
   5  -1  16 143.318 79.0311   1
   5   1  16 86.9072 70.1880   1
  -1   5  16 46.0061 69.9734   1
  -5   1  16-3.86816 63.8400   3
  -5  -1  16-28.0333 60.9072   3
   1   5  16 58.7981 61.7486   3
  -1   5  16-48.1822 68.9401   3
   1   5  16 109.630 78.1072   1
  -5  -1  18 335.567 89.8242   3
  -1   5  18 352.852 90.5998   3
  -1   5  18 397.271 106.490   1
  -5   1  18 248.588 76.1337   3
   1   5  18 466.990 88.1428   3
  -5  -2  -1 446.519 57.0675   4
  -5   2  -1 484.270 35.9289   3
  -5   2  -1 446.088 48.9479   4
   5   2  -1 433.342 45.4060   3
  -5   2  -1 403.006 26.1222   1
  -5   2   1 458.293 46.1092   3
   2  -5  -1 482.652 61.3306   2
   5  -2   1 422.982 46.2861   4
  -5   2   1 464.684 40.8375   4
  -5   2   1 471.270 48.4208   2
   5  -2  -1 438.981 44.7968   3
   5  -2   1 444.094 36.1814   3
   2  -5   1 473.769 55.3961   2
  -2  -5  -1 425.157 44.7440   2
  -2   5   1 463.998 57.3733   2
   5  -2   1 371.576 44.8116   2
  -2   5   1 514.194 54.7800   3
  -2   5   3 18363.4 288.298   3
  -5   2  -3 18473.2 181.409   3
   2   5   3 17897.4 252.253   2
   5  -2  -3 18900.1 277.662   3
  -5   2  -3 18330.3 236.029   1
  -5   2  -3 18822.5 280.698   4
   5   2   3 18950.8 287.968   4
   5  -2   3 18429.6 184.048   3
  -2  -5  -3 18681.4 255.288   4
  -5   2   3 18614.2 195.493   1
  -5  -2  -3 18124.4 286.582   4
  -5   2   3 18379.6 274.529   3
   2  -5  -3 18149.0 289.592   3
   5  -2   3 18470.9 280.282   4
   5  -2   3 17908.4 235.614   1
   5   2  -3 18111.3 274.639   3
  -2  -5  -5 14728.2 234.191   4
  -5   2   5 14788.9 261.897   3
   5   2  -5 14699.1 259.357   3
  -2   5   5 14657.1 268.061   3
  -5  -2   5 14644.9 257.192   3
   5  -2   5 14729.3 238.332   1
  -5   2  -5 14517.5 236.922   1
   2  -5  -5 14695.7 272.173   3
   5  -2   5 14661.6 268.215   4
   5   2  -5 14716.8 223.918   1
   5   2   5 14651.4 265.287   4
  -5   2   5 14299.1 202.323   1
   5  -2  -5 14592.5 262.404   3
   2   5  -5 14426.9 241.840   3
   2   5   5 14334.7 259.523   3
  -5  -2  -5 14677.5 270.101   4
  -5   2   7 761.946 55.2654   1
  -2   5  -7 794.953 44.8315   3
   2   5   7 873.609 61.8142   4
   2   5  -7 783.663 62.7120   3
   5  -2  -7 919.047 75.6432   3
  -5  -2  -7 781.983 75.2568   4
   5   2  -7 814.109 68.8113   3
   5   2   7 760.005 50.7231   3
   2   5   7 856.639 73.9335   3
  -5  -2   7 913.367 74.2490   3
   2  -5  -7 865.365 76.4762   3
   2   5  -7 857.374 74.4910   1
  -2  -5  -7 1220.18 73.0155   4
  -2   5  -7 858.104 72.3747   1
   5  -2   7 830.936 67.9292   1
   5   2   7 756.363 67.2838   4
  -2   5   7 847.754 41.1539   4
  -2   5   7 783.511 75.4059   3
   5   2  -7 888.945 62.4424   1
  -5   2   7 801.702 71.0592   3
   5  -2   7 817.310 76.0099   4
  -5  -2   9 139.681 47.0185   3
   5   2  -9 164.066 49.7489   3
   5   2   9 158.028 41.5395   1
  -2   5   9 245.080 57.0295   3
  -5   2   9 132.349 49.0552   3
  -5   2   9 136.559 38.5476   1
   2   5  -9 154.573 41.0297   3
  -2   5  -9 166.432 28.0070   3
   2  -5  -9 162.098 53.1052   3
   5  -2   9 140.175 44.0409   1
   2   5   9 98.8431 47.2905   3
   5   2   9 186.517 31.0900   3
   2   5   9 160.169 42.9800   4
  -2   5   9 152.724 29.6750   4
   5   2  -9 110.127 37.2358   1
   5   2   9 115.739 38.2000   4
  -5   2  11 10621.3 253.926   1
  -5  -2  11 10974.8 269.194   3
   2   5  11 10866.1 263.479   3
   5   2  11 11186.6 206.929   3
   2   5 -11 10859.9 250.018   3
  -2   5 -11 10613.3 199.906   3
  -5   2  11 10517.6 272.262   3
   5   2  11 10706.9 277.816   1
   5  -2  11 11108.1 280.596   1
  -2   5  11 10392.4 271.794   3
   2   5  11 11489.8 255.623   4
  -2   5  11 10690.3 210.520   4
   5   2  13 1722.77 86.7309   3
  -2   5  13 1531.42 119.446   3
  -2   5 -13 1685.09 84.9344   3
  -5   2  13 1584.00 119.827   3
  -5   2  13 1712.10 116.933   1
  -5  -2  13 1610.57 115.875   3
   5  -2  13 1814.38 133.042   1
  -2   5  13 1720.23 124.861   1
  -2   5  13 1466.47 89.4884   4
   2   5  13 1637.76 127.138   1
   2   5  13 1617.21 113.634   3
   5   2  13 1729.05 128.728   1
  -5   2  15 129.411 66.2051   3
  -5   2  15 149.637 68.3823   1
   2   5  15 209.225 62.4833   3
   2   5  15-44.2598 81.8214   1
   5   2  15 132.597 70.4728   1
  -2   5  15 83.4176 68.3870   1
  -2   5  15 158.599 67.2989   3
   5  -2  15 166.075 75.1779   1
  -5  -2  15 147.030 66.3993   3
   5   2  15 197.433 47.8340   3
  -2   5  17 147.000 72.4587   3
   2   5  17 341.939 74.1858   3
  -5   2  17 223.823 80.5514   1
   2   5  17 279.416 85.1212   1
  -5   2  17 245.393 76.4786   3
   5   2  17 416.308 94.4931   1
  -2   5  17 231.533 86.8022   1
  -5  -2  17 223.475 72.0353   3
  -2   5  19 1982.29 155.848   3
  -5   2  19 1602.13 147.372   3
  -3   5   0 31111.9 367.880   3
  -5   3   0 30816.1 340.621   4
   5  -3   0 30369.4 347.521   3
   5  -3   0 29995.0 344.436   4
  -3   5   0 29835.8 393.282   2
  -3  -5   0 30683.5 332.066   2
   3  -5   0 30947.0 401.318   2
  -5   3   0 31154.7 346.463   3
  -5   3   0 30817.3 380.495   2
   5   3  -2 18643.8 271.454   3
  -5   3   2 18508.6 214.119   4
   5  -3  -2 18856.9 273.730   3
  -3   5  -2 18416.7 242.139   3
   3  -5  -2 19219.3 287.734   3
  -3   5   2 18624.1 283.506   3
  -5   3  -2 18519.0 229.050   1
   3   5   2 17753.1 232.159   2
   5  -3   2 18481.8 267.623   2
  -5   3   2 18284.8 269.524   3
   5  -3   2 18074.7 214.138   3
  -3   5   2 18354.2 294.047   2
   5  -3   2 18084.7 266.188   4
  -5   3  -2 18565.1 211.988   3
  -5   3  -2 18781.1 267.319   4
  -5  -3  -2 17854.4 284.749   4
   5  -3  -4 107652. 1013.93   3
   5   3   4 107898. 1018.11   4
  -5  -3  -4 104709. 1016.33   4
   5   3  -4 105717. 999.957   3
   3  -5  -4 105967. 1025.84   3
  -3   5   4 106915. 1021.56   3
   5  -3   4 104751. 1009.31   4
  -5   3  -4 103092. 952.814   1
  -5   3   4 103074. 1003.79   3
  -3  -5  -4 106367. 985.774   4
  -3  -5  -6 529.844 65.0467   4
  -3   5   6 486.386 21.4726   4
   3  -5  -6 515.636 62.7551   3
   3   5  -6 449.657 51.7185   3
   5  -3  -6 593.384 64.2375   3
  -5  -3  -6 454.956 64.1792   4
   5   3  -6 511.468 56.6025   3
  -3   5  -6 538.020 60.2665   1
  -5   3   6 612.909 65.9732   3
  -5   3  -6 537.450 56.3267   1
  -3   5  -6 452.500 30.8171   3
   3   5   6 474.301 50.5144   4
   5  -3   6 477.853 63.2007   4
   5   3   6 537.890 60.1965   4
   3   5   6 426.892 58.2712   3
  -3   5   6 545.514 66.9912   3
   5   3  -6 551.831 53.6894   1
  -5   3   6 490.431 44.0776   1
   3   5   8 6558.29 184.132   3
   5   3  -8 6393.53 174.672   1
  -3   5   8 6444.91 116.453   4
  -3   5  -8 6585.08 193.876   1
   5  -3  -8 6613.29 198.223   3
   5   3   8 6312.35 156.789   3
  -5  -3  -8 6507.64 198.954   4
   5  -3   8 6312.79 201.187   4
  -3   5  -8 6133.90 113.818   3
   3   5   8 6432.41 172.475   4
  -5   3   8 6207.69 161.268   1
  -3  -5  -8 6340.36 177.091   4
   3   5  -8 6272.34 174.391   3
   3   5  -8 6699.32 193.720   1
   5   3   8 6481.30 190.441   4
   5   3  -8 6760.34 191.494   3
  -5  -3   8 6303.12 183.462   3
   3  -5  -8 6425.80 199.879   3
  -5   3  -8 6096.83 181.513   1
  -5   3   8 6173.20 190.534   3
  -3   5   8 5930.81 189.121   3
   5   3  10 17437.3 287.437   3
  -3   5 -10 17375.4 233.985   3
  -5   3  10 16907.0 314.391   1
   3   5  10 16934.0 327.348   3
  -5  -3  10 17442.7 338.371   3
  -5   3  10 16794.9 347.657   3
   5   3  10 17434.6 349.316   1
   3   5  10 17742.8 326.326   4
  -3   5  10 17137.2 353.623   3
  -3   5  10 17172.3 252.472   4
   3   5 -10 17654.0 329.140   3
  -5   3  12 27300.0 457.361   1
   3   5  12 27717.6 454.434   3
   5   3  12 28141.0 398.390   3
  -5  -3  12 28071.2 473.589   3
  -3   5 -12 28020.4 346.643   3
  -3   5  12 27729.3 481.284   1
   5   3  12 28145.7 500.779   1
  -3   5  12 27672.1 493.419   3
  -3   5  12 27805.4 382.772   4
  -5   3  12 27601.2 487.590   3
  -3   5  14 475.698 83.1749   3
   3   5  14 486.906 71.9537   3
  -5   3  14 455.645 83.9959   3
   5   3  14 380.440 54.5462   3
  -3   5  14 270.188 71.4147   1
   5   3  14 459.330 84.9283   1
  -5   3  14 465.188 82.5123   1
   3   5  14 417.981 84.5993   1
  -5  -3  14 442.748 74.2430   3
   3   5  16 565.735 79.8404   3
   5   3  16 503.523 99.4932   1
  -3   5  16 522.190 93.7169   1
   3   5  16 732.952 108.658   1
  -3   5  16 459.459 87.5842   3
  -5   3  16 348.024 81.1403   3
  -5   3  16 523.289 94.1880   1
  -3   5  18 6716.62 275.500   3
  -3   5  18 6908.43 292.910   1
  -5   3  18 6761.00 278.003   3
  -5   3  18 7045.78 291.209   1
   4  -5  -1 1645.12 51.6212   4
   4  -5   1 1570.63 86.1853   2
  -5   4   1 1572.70 56.4316   4
   4  -5  -1 1557.23 77.8486   3
  -4   5   1 1697.76 89.8323   2
   4  -5   1 1482.67 65.4645   4
   5  -4  -1 1649.43 60.2683   4
  -5   4  -1 1510.53 63.6846   3
   5  -4  -1 1785.67 83.0694   3
  -4   5  -1 1458.62 65.6572   3
  -4   5   1 1560.83 76.9007   3
   5  -4   1 1404.78 80.6896   2
  -4  -5  -1 1601.96 57.4206   2
   5  -4   1 1483.33 63.8694   3
   5  -4   1 1561.67 68.7342   4
  -5   4   1 1820.16 79.7768   3
  -5   4   1 1598.41 86.0032   2
  -4  -5  -3 97583.7 940.132   4
   4  -5  -3 98010.1 957.425   3
  -5   4   3 98233.1 798.681   4
   5   4  -3 97301.4 936.397   3
  -4   5  -3 96866.5 847.857   3
   5  -4   3 97099.5 933.913   4
   4   5   3 96647.6 849.349   2
  -4   5   3 96793.1 948.946   3
  -5   4  -3 99023.0 819.496   3
  -5   4   3 98091.0 940.454   3
   4  -5   3 97416.9 924.565   4
   5   4   3 96665.5 798.513   2
   5  -4  -3 97564.0 947.375   3
  -5  -4  -3 97388.6 953.900   4
  -5   4  -3 97904.8 889.280   1
  -4  -5  -5 60444.5 676.951   4
   5  -4   5 62921.9 700.374   4
   4   5  -5 62427.0 677.962   3
  -5   4  -5 62667.7 659.116   1
   5   4   5 62858.3 690.059   4
  -5   4   5 60878.9 692.966   3
   5  -4  -5 63946.1 707.301   3
  -4   5   5 61805.7 700.495   3
  -4   5  -5 62765.6 673.853   1
  -4   5  -5 61156.6 549.182   3
   4  -5  -5 63333.2 711.338   3
   5   4  -5 63130.6 686.311   3
  -5  -4  -5 61321.1 691.119   4
   4   5  -7 6032.13 174.950   3
  -4   5  -7 5789.66 90.3470   3
   5  -4   7 6091.16 189.704   4
   5   4   7 6053.78 176.031   4
   5   4  -7 6061.24 177.261   3
   4   5   7 6211.20 172.127   4
  -5  -4  -7 5745.03 179.853   4
  -4   5  -7 6130.32 179.280   1
   4   5   7 6100.60 170.989   3
   5   4  -7 6108.71 170.051   1
   4   5  -7 6279.78 179.539   1
   5   4   7 6125.08 160.681   3
   4  -5  -7 6214.31 194.779   3
  -5   4   7 5875.94 182.001   3
  -4  -5  -7 5697.13 172.502   4
   5  -4  -7 6157.22 190.344   3
  -4   5   7 6036.93 88.7551   4
   4  -5   7 6008.58 185.046   4
  -5   4  -7 5970.79 172.813   1
  -4   5   7 5803.71 182.854   3
   5   4   9 205.150 52.2994   4
  -5   4   9 258.808 62.6606   3
  -5   4   9 193.670 43.9815   1
  -4   5   9 346.940 64.9960   3
   5   4   9 267.256 52.0996   3
  -4   5   9 296.260 32.0772   4
   4   5   9 261.776 53.5513   4
  -4  -5  -9 262.487 56.1700   4
  -4   5  -9 284.187 23.1291   3
   4   5  -9 206.871 47.0915   3
  -5  -4  -9 223.405 60.2794   4
   4   5   9 273.546 55.0189   3
   5   4  -9 232.052 53.2612   1
  -4   5  11 48826.5 526.200   4
  -4   5 -11 49051.8 456.659   3
   4   5  11 48444.3 631.744   3
  -5   4  11 48324.3 634.354   1
  -4   5  11 47589.8 645.092   1
  -5   4  11 48001.5 681.915   3
  -4   5  11 48357.0 688.146   3
   5   4  11 48874.8 599.627   3
  -4   5  13 7717.65 246.740   1
   5   4  13 7592.04 258.950   1
   4   5  13 7974.69 265.498   1
  -4   5  13 7672.31 257.095   3
  -5   4  13 7447.44 254.205   3
  -5   4  13 8052.05 245.013   1
   4   5  13 8006.92 228.564   3
  -5   4  15 2330.94 160.282   3
  -4   5  15 2354.94 156.088   1
  -5   4  15 2181.05 148.869   1
   5   4  15 2516.57 124.857   3
  -4   5  15 2249.87 156.875   3
   4   5  15 2438.79 135.615   3
   5   4  15 2392.13 165.306   1
   4   5  15 2452.93 167.429   1
  -4   5  17 1892.19 155.653   1
   5   4  17 2388.37 180.518   1
   4   5  17 2089.96 168.853   1
  -5   4  17 1885.32 156.541   1
  -5   4  17 2084.08 161.391   3
  -4   5  17 2132.36 162.703   3
   5  -5   0 4530.80 144.875   2
   5  -5   0 4466.55 122.760   3
  -5   5   0 4441.93 142.658   2
   5  -5   0 4451.29 105.383   4
  -5   5   0 4500.73 120.980   3
  -5   5   2 12942.3 257.129   2
  -5   5   2 13272.8 238.647   3
  -5   5  -2 12965.7 196.076   3
   5  -5   2 13089.9 247.532   2
   5  -5   2 13052.1 223.682   4
   5  -5  -2 13008.8 241.036   3
  -5   5  -4 57756.6 527.780   3
   5  -5  -4 63294.6 687.513   3
  -5  -5  -4 59018.0 664.334   4
  -5   5  -4 58779.7 627.431   1
   5  -5   4 58993.5 655.270   4
  -5   5   4 56677.8 661.708   3
   5   5   4 58433.9 547.637   2
   5   5  -4 58110.7 654.815   3
  -5   5  -6 592.930 61.0710   1
  -5  -5  -6 618.418 67.4889   4
  -5   5  -6 579.414 22.0287   3
  -5   5  -6 525.530 20.8774   3
  -5   5   6 531.093 68.1219   3
   5   5  -6 629.984 64.7971   3
   5  -5  -6 597.066 67.0464   3
   5  -5   6 540.635 70.4712   4
  -5  -5  -8 100.190 50.1619   4
   5   5   8 139.757 42.6431   4
  -5   5  -8 105.085 47.1715   1
  -5   5   8 160.774 55.3247   3
  -5   5   8 158.706 21.8355   4
   5   5   8 128.636 43.6526   3
   5   5  -8 236.076 52.1246   1
  -5   5  10 9267.10 161.315   4
   5   5  10 8637.76 224.442   3
  -5   5  10 8975.17 229.196   1
  -5  -5 -10 9460.98 259.154   4
  -5   5  10 8925.49 263.320   3
   5   5  12 15871.8 320.034   3
  -5   5  12 15267.3 365.551   3
  -5   5  12 15153.2 334.991   1
  -5   5  12 15702.6 254.169   4
  -5   5  14-14.1826 56.2465   1
  -5   5  14 8.86207 66.6649   3
   5   5  14 6.04990 62.6866   1
   5   5  14 51.9363 50.1710   3
   5   5  16 39.9905 70.0271   1
  -5   5  16 48.2922 69.5927   1
  -5   5  16 88.9557 73.3637   3
  -5   5  18 4521.97 238.427   3
  -5   5  18 4369.39 234.439   1
  -6   0   0 152956. 1262.98   2
   6   0   0 154084. 1294.28   3
   0  -6   0 150377. 1342.02   2
  -6   0   0 152771. 1294.16   3
  -6   0   0 153072. 1327.61   4
   6   0   2 1731.74 87.1023   4
   6   0  -2 1718.79 35.9975   1
  -6   0   2 2036.72 85.1166   3
   6   0   2 1702.58 58.9481   3
  -6   0  -2 1508.98 83.5303   4
   6   0   2 1695.33 57.5018   2
   6   0  -2 1736.81 78.8512   3
   0   6   2 1621.35 81.4350   2
   0  -6  -4 2464.82 71.8425   4
   6   0   4 2421.54 84.1018   1
   0   6   4 2384.07 108.389   3
   6   0   4 2342.80 59.0360   3
   6   0  -4 2399.21 64.1577   1
   6   0   4 2578.48 109.043   4
   6   0  -4 2517.05 102.781   3
  -6   0   4 2473.18 103.181   3
   6   0   6 13981.4 281.183   4
  -6   0  -6 13717.2 280.897   4
  -6   0   6 13726.4 266.707   3
   6   0  -6 14262.0 274.875   3
   0  -6  -6 13400.4 200.112   4
   6   0   6 13569.5 165.659   3
   0   6   6 13936.4 276.307   3
   6   0   6 13623.6 243.173   1
   0   6   8 61622.2 745.002   3
   6   0   8 63857.9 766.589   4
   6   0   8 62393.7 712.400   1
   6   0   8 62802.0 542.757   3
   6   0  -8 63131.0 747.197   3
   0   6   8 62617.1 626.254   4
  -6   0   8 63941.3 740.715   3
   0   6  -8 62197.0 658.799   3
   0   6  10 70.8788 34.9653   4
   0   6 -10 73.0058 34.4283   3
   0   6  10 82.3506 55.6162   3
   6   0  10 28.2855 47.9725   1
   6   0  10 78.1537 18.1119   3
  -6   0  10 101.137 55.1458   3
   6   0  12 2171.79 64.0358   3
  -6   0  12 2359.13 137.232   3
   6   0  12 2225.78 132.155   1
   0   6  12 2238.21 108.312   4
   0   6  12 2104.50 131.483   3
   0   6 -12 2204.02 107.088   3
   6   0  14 11355.8 326.479   1
   0   6  14 10833.3 325.874   1
   0   6  14 11209.7 311.365   3
  -6   0  14 11077.2 313.184   3
  -6   0  16 11647.4 341.745   3
   0   6  16 11265.5 331.024   3
   0   6  16 12253.1 371.429   1
   6   0  16 11712.3 366.993   1
  -6   0  18-60.4296 82.8308   3
   0   6  18 266.243 85.0573   3
   1  -6  -1 44840.7 525.338   2
  -1  -6  -1 44755.6 498.876   2
   6  -1   1 44758.7 502.842   4
  -6   1   1 45060.4 476.700   4
   6  -1   1 45187.2 396.775   1
   1  -6   1 44539.0 515.492   2
   6  -1   1 45222.4 446.675   3
  -6   1   1 44728.5 478.150   3
  -6   1  -1 44837.2 496.507   4
   6   1   1 44803.5 460.032   3
   6   1  -1 45319.9 485.222   3
  -6   1  -1 45152.4 446.597   3
  -1   6   1 44395.7 519.416   2
  -6  -1  -1 45430.3 512.703   4
   6  -1  -1 45420.2 481.146   3
   6  -1   3 12663.4 158.159   3
   6  -1   3 12650.8 186.664   1
  -1   6   3 12803.5 240.554   2
   6   1  -3 13158.9 230.909   3
  -6  -1  -3 12856.0 241.446   4
  -6   1  -3 12889.5 237.125   4
  -1   6   3 12757.3 243.529   3
   6  -1   3 12834.4 239.113   4
  -6  -1   3 12789.1 228.530   3
   1   6   3 12436.2 224.376   2
   6   1   3 12900.4 243.601   4
   6  -1  -3 13005.3 231.537   3
  -6   1   3 12926.3 229.408   3
   6   1  -3 13378.9 168.661   1
  -1  -6  -5 755.565 51.2114   4
   6  -1   5 814.374 71.4639   4
  -6  -1  -5 790.949 71.9626   4
   6  -1   5 748.206 58.2007   1
   1   6   5 814.431 71.1069   3
  -6   1   5 742.211 68.2922   3
  -6   1   5 830.253 46.4199   1
   6   1  -5 749.517 65.3387   3
   1  -6  -5 828.540 37.0468   4
  -1   6   5 760.310 72.4772   3
   6   1  -5 742.680 46.4266   1
   6   1   5 830.108 71.2300   4
   6  -1  -5 780.716 65.4038   3
  -6   1  -5 764.615 71.7585   4
  -6  -1   5 826.254 68.8704   3
   1   6  -7 33900.1 432.203   3
  -6  -1   7 34439.6 476.609   3
   6  -1   7 33871.8 451.529   1
   6   1   7 34053.7 456.134   1
   1  -6  -7 35068.7 499.481   3
   6  -1  -7 35072.9 489.260   3
  -1   6  -7 34618.4 491.428   1
   6  -1   7 34871.4 504.557   4
  -1   6   7 33807.2 490.710   3
  -6   1   7 34876.7 412.742   1
  -1   6  -7 33374.0 399.263   3
   6   1   7 33673.3 367.518   3
   1   6   7 34666.5 488.477   3
   6   1  -7 33794.6 416.726   1
  -1  -6  -7 34103.3 411.918   4
   6   1   7 35516.4 500.496   4
  -6  -1  -7 34534.5 500.969   4
   6   1  -7 34907.1 485.089   3
  -6   1   7 34262.9 479.996   3
  -1   6   9 7280.08 150.019   4
  -1   6  -9 7040.38 160.575   3
   1   6  -9 7164.62 180.531   3
   6   1   9 7170.82 133.666   3
   1   6   9 7338.28 171.480   4
   6  -1   9 7270.81 204.862   1
   1   6   9 6993.27 209.587   3
  -6  -1   9 7415.54 212.929   3
  -1   6   9 6803.40 212.868   3
  -6   1   9 7089.58 209.224   3
  -6   1   9 7600.53 187.565   1
   6   1   9 7454.39 208.144   1
  -1   6  11 1921.91 89.4337   4
   1   6  11 1907.25 121.602   3
  -1   6 -11 1926.84 90.1732   3
   6  -1  11 1838.96 116.362   1
   6   1  11 1957.03 71.4573   3
   6   1  11 1799.68 114.229   1
  -6  -1  11 1788.83 116.290   3
  -6   1  11 1901.16 122.154   3
  -1   6  11 1955.66 125.467   3
  -6   1  11 2011.44 111.945   1
   1   6  11 1884.59 99.1048   4
   1   6 -11 1856.30 100.755   3
  -1   6  13 59.6414 41.7472   4
  -1   6  13 82.8597 59.5142   3
   6  -1  13 73.6083 58.2259   1
  -6   1  13 86.7818 60.1192   3
  -6  -1  13 80.8913 57.5587   3
   6   1  13 51.7552 24.9189   3
  -1   6  13 42.8860 60.6596   1
   1   6  13 100.894 56.2316   3
  -6   1  13 90.1395 51.6502   1
   6   1  13 100.211 57.5607   1
   1   6  13-1.25305 44.3783   4
  -1   6 -13 46.7613 34.0970   3
  -6  -1  15 9926.18 302.207   3
  -6   1  15 10066.2 310.838   3
   6   1  15 10058.8 323.112   1
   1   6  15 10065.8 329.013   1
   1   6  15 10272.7 300.693   3
  -1   6  15 10219.8 322.839   1
   6  -1  15 10370.6 330.218   1
  -1   6  15 10124.3 311.561   3
   6  -1  17 1091.71 132.288   1
   1   6  17 950.846 109.617   3
  -1   6  17 825.145 115.656   1
   6   1  17 989.628 124.278   1
  -1   6  17 970.330 119.705   3
  -6  -1  17 934.166 112.506   3
   1   6  17 781.863 112.870   1
  -6   1  17 875.813 113.517   3
  -1   6  19 867.494 119.004   3
  -6  -1  19 943.363 118.433   3
   2  -6   0 5079.51 148.606   2
   6  -2   0 4986.49 125.607   4
  -6   2   0 5137.91 122.234   4
  -6   2   0 4996.14 127.363   2
  -6   2   0 5075.17 116.666   3
   6   2   0 5021.70 123.332   3
  -2   6   0 4957.27 133.667   3
   6  -2   0 5156.65 117.367   3
  -2  -6   0 5100.89 126.523   2
   6  -2   2 230.923 27.8327   3
   6  -2   2 231.451 43.4691   4
  -6  -2  -2 224.026 53.2425   4
  -2   6   2 245.945 51.8239   2
  -6   2  -2 299.887 50.0168   4
   6  -2   2 222.723 39.6343   2
   2   6   2 247.940 42.1051   2
  -2   6   2 192.681 72.5036   3
   6  -2  -2 258.884 41.9551   3
   6   2  -2 293.431 44.6235   3
  -6   2  -2 232.266 26.6447   3
  -6   2   2 189.749 41.2337   3
  -6   2   2 347.420 40.3573   4
  -6   2  -4 395.361 55.5902   4
  -6   2   4 399.439 54.0482   3
  -6  -2  -4 508.285 64.3511   4
   6   2  -4 436.650 53.0400   3
   6  -2   4 393.307 53.3143   4
   6  -2   4 420.944 20.7125   3
   6   2   4 445.811 59.0785   4
   2   6   4 402.538 47.0311   2
  -6   2   4 403.822 28.4689   1
  -2   6   4 419.297 59.1828   3
   2  -6  -4 402.899 58.0260   3
   6  -2  -4 403.765 53.6176   3
  -6  -2   4 436.428 55.5083   3
  -2  -6  -4 386.975 45.9276   4
   6  -2   4 509.515 47.0666   1
   6   2  -6 844.184 69.6528   3
   6   2   6 982.310 78.2880   4
   6   2  -6 925.185 58.9351   1
   2   6   6 895.605 76.0257   3
  -2   6   6 811.330 77.2195   3
   2   6  -6 930.918 66.7922   3
   2  -6  -6 845.935 76.7881   3
   6  -2  -6 828.515 71.3762   3
  -6   2   6 888.629 76.0297   3
  -6  -2   6 823.471 71.1257   3
  -6  -2  -6 914.350 78.3618   4
   6  -2   6 806.084 63.5391   1
  -6   2   6 909.338 52.7001   1
  -2  -6  -6 879.174 61.7931   4
   6  -2   6 936.092 81.5520   4
  -2   6  -8 3820.72 104.173   3
  -2  -6  -8 3721.18 127.437   4
   6   2  -8 3935.92 129.757   1
   6   2  -8 3948.66 152.934   3
  -6   2   8 3637.06 119.925   1
   6   2   8 3824.89 143.105   1
  -6  -2  -8 3863.27 161.431   4
   2   6  -8 3915.30 134.474   3
   6  -2   8 3745.46 141.677   1
  -6  -2   8 3820.68 146.972   3
   2   6   8 4029.45 127.799   4
  -6   2   8 3730.30 150.916   3
  -2   6   8 3916.60 158.010   3
  -2   6   8 3870.43 88.1649   4
   6   2   8 3669.91 108.768   3
   6   2   8 3979.36 157.198   4
   2   6   8 3801.30 150.531   3
   2  -6  -8 3975.71 161.175   3
  -2   6 -10 135.953 30.2436   3
   6   2 -10 138.765 43.6517   1
   2   6  10 189.134 58.0328   3
  -6   2  10 117.196 43.0867   1
   2   6 -10 113.624 38.8590   3
  -6  -2  10 93.4819 50.8979   3
  -2   6  10 120.346 31.2346   4
   6  -2  10 112.040 46.5448   1
   6   2  10 129.926 29.8854   3
   6   2  10 144.025 51.0313   1
   2   6  10 213.052 47.9693   4
  -6   2  10 76.9041 52.1544   3
  -2   6  10 62.4631 55.2677   3
   2   6  12 1085.00 86.1854   4
  -2   6  12 926.865 97.9755   3
  -2   6  12 1016.74 66.7089   4
   6  -2  12 1178.49 101.541   1
  -6   2  12 919.048 95.2715   3
   2   6  12 1075.82 96.3305   3
  -6   2  12 975.195 87.5539   1
   6   2  12 938.068 93.5447   1
  -2   6 -12 1024.65 65.9573   3
   6   2  12 925.284 58.7462   3
  -6  -2  12 1014.92 96.4133   3
   6   2  14 147.346 63.6287   1
  -6   2  14 323.936 73.5034   1
  -2   6  14 190.819 74.3821   1
   6  -2  14 280.716 74.5680   1
  -6   2  14 138.329 61.2139   3
   2   6  14 106.017 65.7963   1
   6   2  14 229.586 41.9361   3
  -6  -2  14 201.232 66.6241   3
  -2   6  14 115.518 62.2277   3
   2   6  14 200.102 63.8778   3
   2   6  16 819.887 113.358   1
  -2   6  16 670.723 107.331   1
   6   2  16 648.516 105.102   1
   2   6  16 745.897 95.9698   3
  -6   2  16 587.325 95.4428   3
  -6  -2  16 686.706 98.6155   3
  -6   2  16 682.144 100.100   1
  -2   6  16 534.481 91.3170   3
  -2   6  18 31.5807 68.4165   3
  -6   2  18 114.883 72.2099   3
  -6   3   1 3560.90 118.319   2
  -6   3  -1 3632.92 107.943   4
   6  -3   1 3510.26 109.182   4
   3  -6   1 3563.06 127.094   2
  -3  -6  -1 3674.60 102.401   2
  -6   3   1 3653.16 109.005   3
  -3   6  -1 3485.90 108.787   3
  -3   6   1 3719.53 120.898   3
  -6   3  -1 3467.93 74.4974   1
   6  -3   1 3761.92 118.149   2
   6  -3   1 3479.48 92.7494   3
   6  -3  -1 3604.54 110.010   3
  -6  -3  -1 3471.68 127.425   4
  -3   6   1 3639.17 129.302   2
  -6   3  -1 3590.22 92.9855   3
   6   3  -1 3602.61 110.988   3
  -6   3   1 3589.13 95.6172   4
   6  -3   3 44.6487 38.4758   4
  -6   3   3 127.362 44.0978   3
   6  -3   3 60.4290 35.3129   2
  -6  -3  -3 316.392 58.7740   4
   3   6   3 58.1530 34.2050   2
  -3  -6  -3 53.5504 42.4741   4
  -6   3   3 119.333 27.5252   4
  -6   3  -3 56.0876 18.3819   3
  -6   3  -3 74.2932 43.0575   4
   6  -3   3 61.8940 20.2545   3
   6   3  -3 51.7385 33.8105   3
  -6   3  -3 54.1638 25.1407   1
  -3   6   3-19.6190 49.3440   3
  -3   6   3 135.154 46.0331   2
   6  -3  -3 90.4279 38.3637   3
   3  -6  -3 56.7113 39.0546   3
  -6   3   5 120.710 24.2036   1
   6   3  -5 137.594 41.3291   3
   6  -3   5 80.1196 41.5367   4
  -6  -3  -5 125.160 51.1605   4
  -6   3   5 69.6181 44.5454   3
  -3  -6  -5 109.781 46.0953   4
  -6   3  -5 128.342 34.7959   1
   6   3   5 131.275 49.9288   4
   3  -6  -5 103.309 40.6162   3
   6  -3  -5 173.541 47.7453   3
  -3   6   5 99.2693 47.3922   3
  -6   3   7 1636.40 103.002   3
  -6  -3  -7 1844.14 110.750   4
   3  -6  -7 1835.32 111.750   3
   6   3   7 1726.04 102.603   4
   6   3   7 1715.18 80.4671   3
   3   6   7 1838.00 104.069   3
  -6   3   7 1664.94 76.5988   1
   6  -3  -7 1801.51 105.941   3
   3   6  -7 1615.22 90.5083   3
   6   3  -7 1695.39 87.3224   1
  -3   6   7 1906.69 111.859   3
   6   3  -7 1636.21 99.2240   3
  -3  -6  -7 1600.84 90.4490   4
  -3   6  -7 1831.90 63.7695   3
   6  -3   7 1876.79 112.269   4
  -3   6  -7 1795.12 103.733   1
  -3   6   9 2739.80 74.8262   4
  -6   3   9 2785.91 112.246   1
  -3   6  -9 2652.65 80.8602   3
  -3  -6  -9 2771.37 124.404   4
  -6  -3  -9 2734.01 141.746   4
   3   6   9 2844.62 132.804   3
  -3   6   9 2820.51 142.209   3
   3   6  -9 2693.39 121.260   3
   3   6   9 2747.51 118.894   4
   6   3   9 2759.67 104.481   3
   6   3  -9 2771.54 122.228   1
  -6   3   9 2657.26 136.317   3
  -6  -3   9 2832.14 134.147   3
  -6  -3  11 470.929 71.2841   3
   3   6  11 530.824 66.3137   4
  -3   6  11 557.295 47.1099   4
  -6   3  11 485.345 78.7940   3
  -6   3  11 503.554 66.2699   1
  -3   6  11 406.633 72.8423   3
   3   6  11 546.061 75.4753   3
   6   3  11 541.380 53.2455   3
   6   3  11 482.309 69.5282   1
  -3   6 -11 590.868 45.0159   3
   6   3  13 1150.35 107.629   1
  -6   3  13 1023.87 107.838   3
  -3   6  13 1020.88 104.294   1
  -3   6  13 1055.63 107.878   3
  -6  -3  13 1202.47 110.944   3
  -6   3  13 1184.68 102.614   1
   3   6  13 1191.43 102.728   3
   6   3  13 781.589 61.1892   3
   3   6  15 805.486 95.2839   3
   6   3  15 828.787 109.158   1
   3   6  15 678.400 106.585   1
  -3   6  15 763.504 104.791   1
  -3   6  15 624.174 100.447   3
  -6   3  15 544.209 90.4344   3
  -6   3  15 778.639 99.1440   1
   3   6  17 322.372 73.3264   3
  -6   3  17 218.699 81.5548   3
  -6   3  17 181.663 77.0769   1
  -3   6  17 141.817 80.8069   3
   6   3  17 160.063 78.6045   1
  -3   6  17 137.296 77.9172   1
   3   6  17 85.8632 77.4676   1
  -4  -6   0 12175.5 189.033   2
   4  -6   0 11914.4 178.718   4
  -6   4   0 12187.3 194.143   4
   6  -4   0 11591.5 202.507   3
   6  -4   0 11684.9 197.251   4
  -6   4   0 11878.4 231.946   2
  -6   4   0 11929.6 203.173   3
  -4   6   0 12432.6 219.287   3
   4  -6   0 11910.4 245.915   2
  -6   4   2 4488.51 143.604   2
   4  -6  -2 4420.22 73.0816   4
  -4   6   2 4561.77 153.299   2
  -6   4   2 4574.14 134.121   3
   4  -6  -2 4438.24 141.343   3
   6  -4  -2 4558.96 135.239   3
   6  -4   2 4468.25 105.030   3
   6  -4   2 4654.18 131.492   4
  -4   6   2 4686.21 141.657   3
   6   4  -2 4543.02 134.613   3
  -6   4  -2 4603.94 107.083   1
   6  -4   2 4326.74 134.768   2
   4  -6   2 4542.46 147.913   2
  -6   4  -2 4633.35 103.154   3
  -4   6  -2 4476.49 117.255   3
  -6  -4  -2 4484.96 146.322   4
  -6   4   2 4503.19 96.9472   4
  -6   4  -4 352.397 22.7280   3
  -4   6   4 274.541 55.5970   3
  -6  -4  -4 337.644 59.3339   4
  -6   4   4 385.452 29.6180   4
  -6   4  -4 315.567 41.1714   1
  -4  -6  -4 254.196 49.7746   4
  -4   6  -4 342.119 34.6309   3
   4   6   4 377.432 42.7236   2
   6  -4   4 343.803 51.5794   4
   4  -6  -4 397.539 57.6800   3
   6  -4  -4 369.223 54.2932   3
  -6   4   4 331.764 57.2554   3
   6   4  -4 460.303 56.8152   3
  -6   4   6 8443.15 220.260   3
  -4  -6  -6 8387.02 206.016   4
   6   4  -6 8689.97 215.698   3
   4   6  -6 8618.69 208.983   3
   6   4   6 9281.16 225.020   4
   6  -4  -6 9145.71 228.750   3
   6  -4   6 8594.21 223.681   4
  -6   4  -6 8557.61 198.275   1
  -4   6   6 8344.93 221.537   3
  -4   6  -6 8389.50 210.540   1
   4  -6  -6 8807.02 231.263   3
  -6  -4  -6 8665.48 223.446   4
   4   6   8 4338.16 149.881   4
   6   4   8 4474.50 163.667   4
  -4   6  -8 4269.92 87.7989   3
   6   4   8 4383.52 141.284   3
  -6   4   8 4480.54 169.407   3
  -6  -4  -8 4465.13 173.448   4
   4   6  -8 4466.19 158.344   3
   6   4  -8 4364.37 150.719   1
  -4   6   8 4328.39 170.833   3
  -6   4  -8 4328.49 156.563   1
  -6   4   8 4174.97 131.622   1
  -4  -6  -8 4063.93 151.053   4
  -4   6   8 4257.28 64.2227   4
   4   6   8 4580.22 162.235   3
  -4  -6 -10 1003.33 90.8134   4
  -6  -4 -10 983.184 100.839   4
   4   6  10 904.509 79.9632   4
  -6   4  10 925.381 76.4804   1
  -6   4  10 853.606 91.2488   3
  -4   6  10 647.443 82.5965   3
   6   4  10 737.450 63.4489   3
  -4   6 -10 956.807 43.3688   3
   4   6  10 791.161 79.8768   3
  -4   6  10 994.046 47.5303   4
  -4   6  12 24.7169 53.0123   1
  -6   4  12 113.716 50.6824   1
   6   4  12 27.5718 49.8902   1
  -4   6  12 55.9523 30.7370   4
  -6   4  12 70.4730 64.7405   3
   4   6  12 31.3477 49.7476   3
   6   4  12 39.0159 39.0961   3
  -4   6  12-46.2721 65.8713   3
  -6   4  14 2073.51 151.729   3
   6   4  14 1922.07 144.910   1
  -6   4  14 1818.97 129.998   1
  -4   6  14 1824.75 132.683   1
   4   6  14 1826.94 121.746   3
   6   4  14 1852.85 102.180   3
   4   6  14 1858.62 145.451   1
  -4   6  14 2106.07 151.370   3
  -4   6  16 1414.62 135.009   1
   6   4  16 1807.58 151.836   1
  -6   4  16 1506.22 138.419   3
  -6   4  16 1377.06 127.238   1
  -4   6  16 1412.48 140.717   3
   4   6  16 1496.83 118.827   3
   4   6  16 1671.73 152.355   1
  -4   6  18 66.6930 86.9704   3
  -6   4  18 146.024 88.7627   1
  -4   6  18-12.6246 88.5505   1
  -5   6  -1 1152.79 66.6866   3
   6  -5   1 1157.26 82.3931   2
   5  -6  -1 1108.07 73.1472   3
  -6   5  -1 1114.71 61.4722   3
  -5  -6  -1 1133.28 52.3953   2
   6  -5   1 1308.54 67.1781   3
  -5   6   1 1186.79 86.8642   2
   6  -5  -1 1106.03 54.5478   4
   6  -5   1 1171.66 64.7075   4
  -6   5   1 1113.21 80.0422   2
   5  -6  -1 1106.07 48.4372   4
   5  -6   1 1203.06 87.2959   2
   5  -6   1 1159.17 62.4897   4
  -6   5   1 1119.85 70.9393   3
  -5   6   1 1161.09 75.0087   3
   6  -5  -1 1179.43 74.5447   3
  -6   5   3 1178.79 83.9859   2
   5  -6  -3 1089.60 78.7735   3
   6  -5   3 1106.50 73.8291   4
  -6   5  -3 1183.28 51.6262   3
  -5  -6  -3 1225.15 84.2625   4
   5  -6   3 1128.06 71.2214   4
  -5   6   3 1060.42 81.7490   2
  -5   6  -3 1117.05 56.0120   3
  -6  -5  -3 1114.39 84.4272   4
   6  -5  -3 1081.65 78.6432   3
  -6   5  -3 1113.90 63.9775   1
   6   5  -3 1108.87 74.6171   3
  -5   6   3 1041.02 77.5944   3
  -6   5   3 1208.64 80.8813   3
   5  -6   3 1079.14 79.1195   2
   6  -5   3 1079.61 77.9143   2
  -6   5   3 1062.49 40.2401   4
  -6   5  -5 949.232 67.5480   1
   5   6   5 1017.53 56.8083   2
   5  -6   5 1069.79 78.7450   4
   6  -5   5 1197.71 83.0823   4
   6   5  -5 1061.31 78.6875   3
   5  -6  -5 1076.84 84.2909   3
   6  -5  -5 976.096 79.7865   3
   5   6  -5 1199.08 80.3802   3
  -6   5   5 1103.15 31.2721   4
  -6   5   5 1287.55 92.2199   3
  -6  -5  -5 1115.01 87.0871   4
  -5   6   5 915.783 81.3474   3
  -5  -6  -5 1062.33 81.4146   4
  -6   5  -5 1116.79 35.0343   3
  -5   6  -5 1090.28 76.0449   1
  -5   6  -5 1089.98 47.3495   3
  -6   5   7 261.126 58.2938   3
  -5   6  -7 343.235 22.2827   3
  -5   6  -7 277.163 21.9694   3
  -5  -6  -7 728.047 75.4127   4
   5   6  -7 250.111 51.9292   3
  -5   6   7 243.186 61.2895   3
  -5   6  -7 330.420 55.3668   1
  -6   5  -7 284.826 51.5555   1
   5   6   7 274.009 52.5920   3
  -6  -5  -7 250.801 64.3743   4
  -6  -5  -9 579.115 77.0412   4
  -6   5   9 750.608 86.4325   3
  -5   6   9 764.922 29.9715   4
   5   6   9 719.986 74.3730   4
   6   5   9 731.714 72.3844   3
   5   6   9 617.651 73.6257   3
  -6   5   9 701.107 65.5245   1
  -5   6   9 620.446 81.6267   3
  -5  -6  -9 743.967 80.1151   4
  -5  -6 -11 246.998 65.3475   4
   5   6  11 176.721 53.7436   3
  -5   6  11 226.667 56.5686   1
  -6   5  11 278.564 53.4334   1
  -5   6  11 305.303 33.3082   4
   6   5  11 154.294 50.2386   3
  -6  -5 -11 174.109 71.2532   4
  -6   5  11 201.976 67.5552   3
  -5   6  11 130.697 65.3904   3
  -6   5  11 239.640 34.8276   4
  -6   5  13 795.762 103.697   3
  -5   6  13 681.732 98.6764   3
  -5   6  13 729.193 89.1715   1
  -6   5  13 783.676 88.3687   1
   6   5  13 850.276 81.4225   3
   6   5  13 707.251 93.2132   1
   5   6  13 607.486 77.6499   3
  -5   6  15 155.266 75.3784   3
   5   6  15 118.552 57.3424   3
   6   5  15 92.0531 51.4247   3
   5   6  15 115.262 76.2853   1
  -6   5  15 25.3819 72.9006   3
   6   5  15 105.725 76.1387   1
  -6   5  15 109.782 67.0901   1
  -5   6  15 141.826 71.9695   1
  -5   6  17-5.85987 72.4265   3
  -6   5  17 39.0156 72.4231   3
  -5   6  17-0.73375 76.7638   1
  -6   5  17 37.3743 73.7133   1
   6  -6   0 20643.9 314.311   3
  -6   6   0 20133.8 304.278   3
  -6   6   0 21114.4 353.477   2
  -6  -6   0 20462.4 246.022   2
   6  -6   0 19774.1 272.929   4
  -6   6   2 172.255 48.3371   3
   6  -6  -2 116.963 23.2215   4
   6  -6   2 56.1478 45.3293   2
  -6   6   2 161.378 50.8202   2
   6  -6  -2 124.408 42.1952   3
   6  -6   2 441.232 48.4948   4
  -6   6  -2 162.073 32.9547   3
  -6   6   4 3114.07 139.223   2
   6  -6   4 3076.03 124.631   4
   6  -6  -4 3051.30 133.537   3
  -6  -6  -4 2944.23 131.441   4
   6   6  -4 3017.84 124.448   3
  -6   6  -4 2823.43 79.5634   3
  -6   6   4 2860.90 127.282   3
   6  -6   4 2629.37 120.940   2
   6   6   4 2904.67 74.9648   2
  -6   6  -4 3119.04 115.322   1
   6  -6   6 144.210 49.6934   4
  -6  -6  -6-5.10301 54.7090   4
  -6   6   6 0.99438 52.3849   3
  -6   6  -6 56.5582 15.1090   3
  -6   6  -6 95.6879 48.7108   1
   6   6   8 16381.4 318.619   3
  -6  -6  -8 15665.3 335.546   4
  -6   6   8 16027.4 348.978   3
  -6  -6 -10 128.046 55.7486   4
  -6   6  10 142.806 21.3582   4
  -6   6  10 113.397 65.9647   3
   6   6  10 194.436 55.4857   3
  -6   6  10 71.7713 43.1549   1
   6   6  12 2139.77 125.286   3
  -6   6  12 2118.22 146.763   3
  -6   6  12 2272.67 132.074   1
  -6   6  14 1289.35 129.345   3
  -6   6  14 1220.26 112.249   1
   6   6  14 1409.24 109.155   3
   6   6  14 1384.86 132.057   1
  -6   6  16 1878.17 160.839   3
  -6   6  16 1754.19 145.512   1
   6   6  16 1855.95 161.645   1
  -6   6  18 240.870 95.0573   1
   0  -7  -1 177753. 1584.68   2
  -7   0   1 179950. 1553.79   4
  -7   0   1 181116. 1539.13   3
   7   0   1 179746. 1503.02   3
  -7   0  -1 178069. 1572.74   4
   0  -7   1 178261. 1578.67   2
   7   0  -1 181389. 1539.40   3
   7   0   3 24065.9 277.546   3
   0   7   3 24546.5 366.308   2
  -7   0  -3 24454.9 367.150   4
   7   0   3 24888.8 374.088   4
   0   7   3 23361.0 368.129   3
   7   0  -3 24721.3 354.776   3
  -7   0   3 23859.1 349.395   3
   7   0   3 24335.3 279.646   2
   7   0  -3 24696.7 236.097   1
   7   0   3 24401.9 291.644   1
   7   0   5 10695.2 245.729   4
  -7   0   5 10339.3 228.011   3
   0   7   5 10231.5 239.797   3
   7   0   5 10333.6 142.147   3
   0  -7  -5 10148.6 165.354   4
   7   0   5 10345.6 197.389   1
   7   0  -5 10829.8 234.998   3
  -7   0  -5 10446.3 239.893   4
   7   0   7 193838. 1796.60   4
  -7   0  -7 193771. 1799.74   4
  -7   0   7 192472. 1763.62   3
   7   0   7 193384. 1709.82   1
   0   7  -7 192027. 1672.25   3
   7   0  -7 197703. 1782.74   3
   0   7   7 192466. 1784.85   3
   0  -7  -7 190815. 1610.42   4
   7   0   7 193561. 1535.72   3
   0   7  -9 45249.1 547.778   3
   0   7   9 46130.2 642.944   3
  -7   0   9 44990.0 625.891   3
   7   0   9 45306.0 601.410   1
   7   0   9 47220.2 407.615   3
   7   0  11 26482.9 461.515   1
  -7   0  11 26269.6 472.626   3
   0   7 -11 25947.9 395.842   3
   0   7  11 26379.4 476.907   3
   0   7  11 27225.5 378.962   4
   7   0  11 26683.3 256.483   3
   0   7  13 855.735 100.379   3
  -7   0  13 830.390 99.0224   3
   7   0  13 904.402 96.0122   1
  -7   0  15 59378.1 858.773   3
   7   0  15 60693.9 879.143   1
   0   7  15 60671.4 894.201   1
   0   7  15 59158.8 856.046   3
   0   7  17 2297.81 176.162   1
   7   0  17 2230.23 173.837   1
   0   7  17 2048.16 158.954   3
  -7   0  17 2084.18 158.296   3
  -7   1   0 181921. 1573.70   4
  -7  -1   0 182979. 1477.12   2
  -7   1   0 181785. 1537.10   2
   1  -7   0 182750. 1623.85   2
   7  -1   0 182628. 1540.96   3
  -7  -1   0 182080. 1595.22   4
  -1  -7   0 185848. 1593.84   2
   7   1   0 182518. 1552.57   3
   7  -1  -2 6886.10 162.967   3
   7  -1   2 6580.77 137.415   2
  -7   1   2 6772.12 160.652   3
  -1   7   2 6968.42 177.558   3
  -7   1   2 6727.67 151.262   4
   1   7   2 6938.05 167.549   2
   7  -1   2 6731.26 114.759   1
   7   1   2 6844.28 137.169   3
   7  -1   2 6994.41 175.077   4
   7   1  -2 6744.44 162.231   3
  -7  -1   2 6836.20 164.156   3
  -7  -1  -2 6656.03 174.710   4
  -1   7   2 6651.77 177.351   2
   7  -1   2 6636.89 125.425   3
  -7   1  -2 6619.00 168.763   4
   1   7   4 43012.3 521.514   2
  -1   7   4 42916.3 542.687   2
  -1  -7  -4 42567.5 460.866   4
  -7   1   4 42395.5 524.123   3
   1   7   4 42667.9 543.490   3
   7   1  -4 42848.3 421.200   1
   7   1   4 43926.3 554.146   4
  -7   1  -4 42315.7 539.168   4
  -7  -1   4 42811.5 525.476   3
   7  -1  -4 43439.7 532.777   3
   7  -1   4 42093.6 395.529   3
  -1   7   4 43358.2 549.338   3
  -7  -1  -4 42136.3 543.597   4
   7  -1   4 43346.5 549.308   4
   7  -1   4 42974.4 462.492   1
   7   1  -4 43412.9 529.687   3
  -7   1   6 28747.9 429.781   3
   1   7   6 29083.5 444.229   3
  -7  -1  -6 28427.8 447.948   4
  -1   7   6 28548.2 443.540   3
   7  -1   6 28950.7 389.566   1
  -7  -1   6 28653.7 429.087   3
   7   1   6 28361.8 390.829   1
   7  -1   6 29785.4 454.766   4
   1  -7  -6 28534.2 302.659   4
   7  -1  -6 29713.8 439.915   3
   7   1   6 29718.5 449.835   4
   7   1  -6 29167.6 437.701   3
   7   1  -6 28854.7 349.537   1
  -1  -7  -6 28772.5 361.544   4
  -7   1  -6 28898.8 447.103   4
  -7  -1   8 85485.9 943.963   3
   7   1   8 84879.1 769.379   3
  -1   7   8 85768.2 964.021   3
   7  -1   8 85059.3 903.881   1
  -7  -1  -8 87999.5 983.675   4
  -1   7  -8 84830.2 835.816   3
   1   7  -8 85786.1 877.926   3
   1   7   8 86003.6 957.103   3
   7   1  -8 86406.7 851.653   1
   7   1   8 85240.5 909.092   1
  -1  -7  -8 86503.0 842.638   4
  -7   1   8 86448.0 947.221   3
  -1   7  10 430.869 46.4264   4
   1   7  10 434.442 54.3085   4
  -1   7 -10 382.347 45.4961   3
   1   7 -10 361.651 52.7567   3
  -7   1  10 345.631 66.6082   3
  -7  -1  10 436.322 71.5992   3
   7   1  10 367.777 33.7420   3
   1   7  10 482.928 77.9535   3
   7   1  10 490.424 72.4039   1
   7  -1  10 409.650 66.4358   1
  -1   7  10 337.545 70.8304   3
  -1   7  12 7930.59 184.448   4
   1   7  12 8071.87 206.745   4
  -1   7 -12 7402.90 189.173   3
  -7  -1  12 7797.97 249.881   3
   7  -1  12 7722.80 246.364   1
   1   7  12 7888.94 251.364   3
  -1   7  12 7756.47 256.112   3
  -7   1  12 7763.03 251.525   3
   7   1  12 7857.34 247.362   1
   7   1  12 7880.59 141.141   3
   1   7 -12 7656.13 213.610   3
  -7  -1  14 21094.7 449.774   3
  -7   1  14 20142.2 444.685   3
   7  -1  14 20363.4 452.359   1
  -1   7  14 19834.2 443.642   3
   7   1  14 20007.2 450.228   1
  -1   7  14 20202.9 457.584   1
   1   7  14 20496.0 440.657   3
   7   1  16 16333.3 438.295   1
   7  -1  16 16838.2 439.037   1
  -7  -1  16 16213.8 412.344   3
  -7   1  16 16368.4 420.590   3
   1   7  16 16458.4 446.298   1
   1   7  16 16061.9 406.829   3
  -1   7  16 16119.7 436.510   1
  -1   7  16 15740.8 414.304   3
  -1   7  18 991.044 123.108   3
   1   7  18 1055.43 123.790   3
  -7   1  18 1002.54 125.277   3
  -7  -1  18 848.180 118.016   3
  -7   2   1 3609.58 107.351   4
  -2  -7  -1 3661.14 117.549   2
  -7   2   1 3604.03 115.108   2
  -7   2   1 3399.63 108.450   3
   7  -2  -1 3438.27 108.029   3
   2  -7  -1 3486.64 133.491   2
  -7  -2  -1 3554.31 128.714   4
   7  -2   1 3488.15 119.411   4
   2  -7   1 3489.23 131.556   2
   7   2  -1 3531.45 113.985   3
  -7   2  -1 3530.71 116.159   4
  -7   2  -1 3579.46 95.8310   3
   7  -2   1 3436.30 94.8449   3
  -2   7   1 3683.34 134.942   2
  -2   7   1 3484.73 124.348   3
   7   2   1 3425.28 103.891   3
  -7  -2  -3 1242.94 86.1913   4
  -7   2   3 1012.93 71.7799   3
   7   2  -3 1150.26 73.3171   3
   2   7   3 1000.25 67.3064   2
   7  -2   3 1070.88 77.0943   4
  -2   7   3 1090.64 83.7647   3
  -7   2  -3 1072.73 75.5034   4
   7  -2   3 1049.78 64.7433   2
  -7   2   3 1238.74 63.8245   4
   7  -2  -3 1155.61 74.1200   3
   7  -2   3 1092.10 45.6810   3
  -2   7   3 1135.95 83.9730   2
   7  -2  -5 424.199 56.4286   3
   7  -2   5 366.967 45.2651   1
   7   2   5 612.620 67.7840   4
  -7   2   5 435.541 61.1303   3
   7   2  -5 390.363 57.5460   3
  -7  -2  -5 388.742 64.9472   4
   2   7   5 369.093 59.2314   3
  -2  -7  -5 368.279 47.1859   4
  -7   2  -5 341.365 62.4884   4
   2   7   5 430.691 54.2964   2
  -2   7   5 370.043 62.5098   3
  -7  -2   5 436.868 59.0006   3
   7  -2   5 368.525 57.3806   4
  -7   2   5 405.159 32.3309   1
   7   2  -5 379.481 39.3569   1
   2   7  -7 4391.33 143.900   3
   7   2  -7 4105.60 125.465   1
  -7   2   7 4095.63 157.859   3
   7   2   7 4517.32 167.108   4
  -2   7  -7 4057.19 156.999   1
   2   7   7 4370.06 162.196   3
  -7  -2   7 4060.11 154.154   3
  -7  -2  -7 4308.64 167.792   4
  -2   7   7 4300.66 165.708   3
  -2  -7  -7 4496.15 135.987   4
  -7   2   7 4217.75 116.366   1
   7  -2   7 4168.76 140.326   1
   7   2   7 4236.28 117.103   3
   2   7   9 2183.07 126.083   3
  -7   2   9 2332.56 129.117   3
  -2   7  -9 2215.51 85.8978   3
   2   7  -9 2356.41 113.284   3
  -7  -2   9 2299.70 125.847   3
  -2   7   9 2040.60 125.099   3
   7   2   9 2208.58 119.364   1
  -2  -7  -9 2387.48 107.748   4
  -7   2   9 2237.38 100.787   1
   7   2  -9 2201.15 104.294   1
   7  -2   9 2240.12 118.481   1
  -7  -2  -9 2294.37 136.648   4
   7   2   9 2361.85 88.1631   3
  -7   2  11 181.021 50.4514   1
  -2   7 -11 142.432 37.3603   3
   2   7  11 89.2034 43.9754   4
   7  -2  11 5.56430 54.0595   1
   7   2  11 63.9057 26.1846   3
   7   2  11 135.979 58.8550   1
  -7  -2  11 119.051 60.0564   3
   2   7  11 115.718 63.3605   3
  -7   2  11 107.637 59.6325   3
  -2   7  11 116.125 33.2546   4
  -2   7  11 87.3950 60.3487   3
  -7   2  13 527.150 75.2392   1
   7   2  13 396.215 42.4701   3
  -7   2  13 395.088 79.8109   3
   7  -2  13 420.164 75.4045   1
   7   2  13 472.007 77.2679   1
  -2   7  13 431.487 83.2344   3
  -7  -2  13 392.704 75.3517   3
   2   7  13 402.472 78.7983   3
  -2   7  15 1257.75 125.095   3
   2   7  15 1145.55 116.806   3
   2   7  15 1104.89 128.798   1
   7   2  15 991.815 111.382   1
  -2   7  15 979.162 117.157   1
  -7   2  15 872.034 112.363   3
  -7  -2  15 979.648 113.493   3
   7  -2  15 1100.48 121.296   1
   2   7  17 490.376 88.8730   3
  -2   7  17 398.360 95.2717   3
  -7   2  17 476.512 92.8033   3
  -7  -2  17 566.890 99.3432   3
  -2   7  17 496.359 98.8103   1
   3  -7   0 32994.5 458.622   2
   7  -3   0 32798.4 403.244   4
  -3   7   0 32859.5 422.995   3
   7   3   0 32906.9 408.211   3
   7  -3   0 33024.3 391.931   3
  -7   3   0 32185.4 291.626   1
  -7   3   0 33109.1 394.926   4
  -7   3   0 32499.6 419.769   2
  -3  -7   0 33167.7 400.464   2
  -7   3   0 33156.2 388.874   3
  -3   7   2 752.766 72.2296   2
  -7   3   2 687.473 48.2607   4
  -7   3  -2 719.351 43.2682   3
   3  -7   2 705.920 71.6710   2
  -7  -3  -2 696.598 72.2634   4
  -7   3   2 651.224 61.3685   3
  -3   7  -2 839.099 59.5562   3
   7  -3   2 690.392 44.3240   3
  -3   7   2 693.568 67.8011   3
   7  -3  -2 727.004 60.6264   3
   7  -3   2 681.350 64.5914   4
  -7   3  -2 696.044 39.6944   1
   7  -3   2 761.105 64.1035   2
   7   3  -2 753.043 62.1352   3
  -7   3   2 709.412 64.8091   2
  -7   3  -2 731.167 64.5042   4
   7   3  -4 42778.6 534.485   3
  -3   7   4 44042.3 567.594   2
   7  -3  -4 44371.9 542.894   3
  -7   3   4 42119.5 395.462   1
  -7   3  -4 42390.4 537.009   4
   7  -3   4 41427.1 386.709   3
  -7   3   4 42293.5 440.752   4
  -7   3   4 42614.1 534.548   3
  -3   7   4 42249.2 551.935   3
   7  -3   4 42829.2 543.458   4
  -7  -3  -4 42537.2 556.119   4
  -3  -7  -4 41752.5 504.723   4
  -7   3  -4 41978.0 466.049   1
   3   7   4 41880.4 496.191   2
   3   7  -6 2019.56 100.300   3
  -7   3   6 2059.63 74.1883   1
   7   3   6 2253.75 116.521   4
  -7  -3  -6 2081.41 118.575   4
  -3  -7  -6 2047.27 98.2527   4
   3   7   6 2046.46 110.635   3
   7  -3  -6 1936.34 107.862   3
  -7   3   6 2027.75 111.314   3
  -3   7   6 2038.52 114.846   3
   7   3  -6 2005.03 88.9681   1
   7   3  -6 2145.39 109.199   3
   3  -7  -6 2152.32 118.924   3
   7  -3   6 2146.33 115.627   4
  -7   3   8 20177.6 304.032   1
   7   3  -8 20195.7 329.553   1
   7   3   8 20402.7 309.407   3
   3   7  -8 20688.7 356.018   3
  -3  -7  -8 20347.2 341.000   4
   3   7   8 20038.3 373.692   3
  -7  -3  -8 19841.5 388.520   4
  -3   7   8 19603.9 384.307   3
  -7   3   8 19992.8 377.912   3
  -3   7  -8 19602.4 266.902   3
  -3  -7 -10 7147.80 204.001   4
  -3   7  10 7210.03 123.037   4
   3   7  10 7123.06 198.185   4
  -7   3  10 6783.92 228.813   3
  -7   3  10 6637.83 184.673   1
   3   7  10 7007.63 224.760   3
   7   3  10 6931.36 168.143   3
  -7  -3  10 6992.34 224.956   3
  -3   7  10 6843.16 231.340   3
   7   3  10 6678.06 214.670   1
  -7  -3 -10 6913.26 240.727   4
  -3   7 -10 6608.04 143.870   3
   3   7  12 9596.86 277.145   3
  -7   3  12 9489.43 249.007   1
   7   3  12 9766.27 202.952   3
  -7  -3  12 9637.87 278.115   3
  -3   7  12 9404.46 288.529   3
   7   3  12 9244.84 276.262   1
  -7   3  12 8985.67 279.319   3
   7   3  14 3157.02 178.085   1
  -3   7  14 3057.36 175.515   1
   3   7  14 3783.69 181.213   3
  -7   3  14 3060.29 157.358   1
  -3   7  14 3357.06 188.189   3
  -7   3  14 3470.03 188.636   3
  -7   3  16 2079.26 150.118   1
  -7   3  16 2192.59 163.110   3
  -3   7  16 2122.07 163.976   1
   7   3  16 2030.93 160.318   1
   3   7  16 2160.81 171.867   1
   3   7  16 2333.83 150.342   3
  -3   7  16 2108.68 164.614   3
  -3   7  18 3663.37 220.302   3
  -7   4  -1 39691.4 467.536   4
   7  -4   1 39624.0 474.467   4
  -4  -7  -1 39848.2 446.645   2
  -7   4   1 39129.2 472.202   3
  -7   4   1 40517.4 435.065   4
  -4   7  -1 40979.5 476.265   3
  -4   7   1 39331.8 495.229   3
   7  -4   1 39435.4 441.395   3
  -7   4  -1 39854.4 439.603   3
  -7   4   1 40061.0 511.345   2
   7  -4  -1 40584.4 480.434   3
  -7   4  -1 38999.4 393.327   1
  -4   7   1 40791.7 537.476   2
   7  -4   1 40028.8 501.388   2
   4  -7  -1 39287.0 395.218   4
   4  -7   1 39815.9 529.232   2
   7   4  -1 39714.1 489.243   3
  -4   7   3 43733.7 577.268   2
  -7   4   3 43157.9 434.255   4
   7   4  -3 43071.4 533.746   3
  -4  -7  -3 42768.6 529.678   4
  -7   4   3 42780.7 531.884   3
   4  -7  -3 44391.2 556.906   3
   7  -4   3 42681.2 430.036   3
  -7   4  -3 42091.0 458.522   1
  -4   7   3 43216.7 548.944   3
  -4   7  -3 43287.9 476.400   3
  -7   4  -3 42959.1 421.561   3
  -7  -4  -3 42685.2 556.551   4
   7  -4  -3 44076.3 541.486   3
   4  -7   3 41970.1 550.616   2
   7  -4   3 42460.0 530.124   4
   7  -4   3 41607.9 517.567   2
   4   7   3 41924.6 466.521   2
  -7  -4  -5 8863.46 232.571   4
   4   7   5 8789.53 186.103   2
  -4  -7  -5 8962.37 212.714   4
   7   4  -5 9487.87 228.325   3
   4  -7  -5 9254.88 236.768   3
   7  -4  -5 9454.00 231.614   3
  -7   4   5 8981.10 224.465   3
  -4   7   5 9222.69 233.566   3
  -7   4  -5 9265.84 194.883   1
  -7   4   5 9026.71 144.552   4
   7  -4   5 9470.39 231.942   4
   4   7   7 41374.1 567.911   3
  -7  -4  -7 40768.2 587.234   4
  -7   4   7 40379.1 577.297   3
   4   7  -7 42714.8 559.937   3
  -4   7   7 41116.1 589.585   3
   7   4  -7 42122.9 524.110   1
  -7   4   7 41220.1 472.402   1
  -7   4  -7 41978.0 540.058   1
  -4  -7  -7 41218.2 546.252   4
  -7   4   9 2726.82 145.487   3
   7   4  -9 2926.18 130.412   1
  -4  -7  -9 2669.09 130.980   4
   7   4   9 2835.80 116.941   3
   4   7   9 2776.98 140.798   3
  -4   7  -9 2770.28 78.4256   3
  -7   4   9 2706.94 111.595   1
  -4   7   9 2872.34 150.699   3
  -7  -4  -9 2588.03 145.030   4
  -7   4  11 21550.7 439.815   3
  -4   7  11 22059.5 248.968   4
  -7   4  11 21044.8 373.611   1
   4   7  11 21840.1 420.167   3
   7   4  11 22108.2 354.801   3
  -7  -4 -11 20936.4 445.749   4
   7   4  11 20770.7 420.157   1
  -4   7 -11 22133.3 269.001   3
  -4   7  11 21842.4 448.813   3
  -4   7  13-54.2922 66.7599   3
  -4   7  13-82.5832 60.4086   1
  -7   4  13-43.4310 51.1613   1
   7   4  13-26.2407 56.6026   1
  -7   4  13-5.87077 60.7215   3
   4   7  13 33.5804 56.4835   3
   7   4  13 60.2038 40.8544   3
  -7   4  15 12138.9 362.320   3
  -4   7  15 12015.1 363.202   3
  -4   7  15 11905.9 350.525   1
   7   4  15 11758.5 357.088   1
   4   7  15 12362.0 374.530   1
  -7   4  15 11492.1 322.335   1
   4   7  15 11987.3 324.338   3
  -7   4  17 96.8210 70.3373   1
  -7   4  17 83.3027 74.9711   3
  -4   7  17 182.314 80.3515   3
  -4   7  17 140.844 79.0003   1
   7  -5   0 3537.94 109.747   4
   5  -7   0 3510.79 144.726   2
   7  -5   0 3666.73 118.890   3
  -5   7   0 3777.97 125.311   3
  -7   5   0 3719.60 138.917   2
  -7   5   0 3829.76 118.885   3
  -5  -7   0 3679.23 103.701   2
  -7   5   0 3692.82 108.592   4
   5  -7   0 3603.69 98.4515   4
  -7   5  -2 283.376 35.8316   3
   7  -5   2 287.703 46.6228   4
   5  -7   2 307.390 43.8963   4
   5  -7  -2 281.227 23.8968   4
  -7  -5  -2 373.488 62.6854   4
   5  -7   2 319.687 59.2202   2
  -5   7   2 269.056 54.7440   2
   7  -5   2 293.204 59.3118   2
  -7   5   2 207.117 52.5998   2
   5  -7  -2 300.240 51.6948   3
   7  -5   2 289.455 36.6491   3
  -5   7  -2 323.080 41.6916   3
   7  -5  -2 258.279 46.8184   3
  -7   5   2 284.139 50.0098   3
  -5   7   2 301.422 53.7769   3
  -7   5  -2 255.266 34.4083   1
  -7   5   2 259.854 32.3131   4
  -7  -5  -4 6354.21 196.379   4
  -5   7   4 6312.88 198.297   2
  -5  -7  -4 5955.24 180.014   4
  -7   5  -4 5991.83 150.972   1
   5  -7  -4 6000.02 188.436   3
  -5   7  -4 5861.56 132.480   3
   7   5  -4 5804.98 175.034   3
  -7   5   4 6066.65 104.604   4
   7  -5  -4 6247.38 187.448   3
  -7   5  -4 6006.49 107.905   3
  -5   7   4 6084.80 186.164   3
   7  -5   4 5847.06 173.144   2
   5   7   4 6136.23 136.762   2
  -7   5   4 5774.92 176.464   3
   5  -7   4 5993.62 172.048   4
   7  -5   4 5982.91 176.933   4
  -5   7   6 54.1472 51.3026   3
  -5   7  -6 47.0687 41.7409   1
  -5  -7  -6 13.5247 44.2957   4
  -7   5   6 54.1009 19.1577   4
   5  -7   6 49.3506 40.1665   4
   7  -5   6 19.8904 41.2835   4
  -5   7  -6 27.9364 21.5711   3
   5   7   6 31.4726 31.2322   2
  -7   5   6 63.3244 50.8649   3
  -7   5  -6 84.9098 40.0506   1
  -7  -5  -6 64.4208 51.5805   4
  -5  -7  -8 3435.59 147.573   4
  -5   7  -8 3434.43 75.6028   3
   7   5   8 3566.14 136.821   3
  -5   7  -8 3594.05 80.1660   3
   5   7   8 3416.43 150.588   3
  -7   5   8 3371.05 119.711   1
  -5   7   8 3578.99 166.886   3
   7   5  -8 3689.60 144.517   1
  -7   5   8 3399.47 159.355   3
  -7  -5  -8 3501.26 161.103   4
   5   7  10 2925.70 147.318   3
  -5   7 -10 2893.39 57.5940   3
  -5   7 -10 2644.56 56.6640   3
   7   5  10 2972.21 131.364   3
  -5  -7 -10 2784.40 142.684   4
  -7  -5 -10 2441.97 146.640   4
  -5   7  10 2775.96 157.736   3
  -7   5  10 2845.23 156.443   3
  -7   5  10 2827.76 124.869   1
  -7   5  12 1048.06 90.6991   1
  -7   5  12 1174.31 118.856   3
   5   7  12 1138.59 105.381   3
   7   5  12 1183.04 89.1116   3
  -5   7  12 1298.01 107.724   1
  -5   7  12 1285.56 124.466   3
  -5   7  14 778.788 111.475   3
  -7   5  14 631.293 99.3034   3
   7   5  14 580.471 93.0440   1
  -5   7  14 838.878 100.479   1
  -7   5  14 701.512 88.3824   1
   7   5  14 826.362 80.3326   3
   5   7  14 743.012 90.6281   3
   5   7  16 0.29862 78.3496   1
  -7   5  16-124.105 81.8121   1
  -5   7  16 50.4719 73.6138   3
   5   7  16-16.5632 63.9975   3
  -7   5  16-1.91823 76.3533   3
   7   5  16 0.87103 70.9602   1
  -5   7  16-1.04660 66.8834   1
  -7   5  18 1039.90 131.703   1
   7  -6   1 30846.1 458.768   2
  -6  -7  -1 30155.1 342.838   2
   7  -6  -1 29860.4 358.885   4
   6  -7  -1 31024.1 433.967   3
   6  -7   1 29976.1 384.039   4
   7  -6   1 30079.7 398.154   3
   6  -7  -1 30407.6 344.645   4
   7  -6  -1 30568.3 425.370   3
   7  -6   1 29912.4 392.790   4
  -6   7  -1 30081.0 397.890   3
   6  -7   1 30405.6 464.455   2
  -6   7   1 30715.5 427.982   3
  -7   6  -1 30644.5 389.155   3
  -7   6   1 29833.7 414.682   3
  -6   7   1 31277.5 475.908   2
  -7   6   1 31742.4 469.336   2
  -6   7   3 4966.18 179.376   2
  -7  -6  -3 4918.56 174.661   4
  -6  -7  -3 4938.70 170.736   4
  -7   6  -3 4591.46 132.393   1
   6  -7  -3 4900.67 165.750   3
   7  -6  -3 4723.95 161.561   3
   7  -6   3 4642.29 161.878   2
   7  -6   3 4900.01 152.843   4
  -7   6   3 4915.54 174.654   2
  -6   7  -3 5008.36 125.372   3
  -6   7   3 4674.95 161.264   3
   6  -7   3 4796.42 149.161   4
   7   6  -3 4810.80 161.115   3
  -7   6  -3 4570.95 112.976   3
  -7   6   3 4831.46 161.110   3
   6  -7   3 4706.34 167.190   2
  -7  -6  -5 913.786 86.4997   4
  -6  -7  -5 1108.66 92.0710   4
   6   7   5 926.479 55.3454   2
  -7   6  -5 976.079 72.8605   1
  -6   7  -5 867.839 47.5443   3
  -6   7  -5 912.468 75.5852   1
  -6   7   5 1066.44 90.7437   3
   7  -6   5 883.773 80.4540   4
  -7   6   5 926.458 87.5965   3
   7   6   5 984.664 43.2615   2
  -7   6  -5 904.956 40.5726   3
   6  -7   5 993.906 80.9106   4
  -7  -6  -7 32437.5 520.680   4
  -7   6  -7 33565.9 490.109   1
  -6  -7  -7 32646.5 507.609   4
  -6   7  -7 33249.3 321.473   3
  -6   7   7 33048.3 529.046   3
  -7   6   7 32495.1 523.238   3
  -7  -6  -9 7150.33 237.486   4
  -7   6   9 7535.39 247.761   3
   7   6   9 7685.45 218.741   3
  -7   6   9 7300.33 194.854   1
  -6   7   9 7240.65 244.440   3
  -6  -7  -9 7255.74 231.226   4
   6   7   9 7592.97 227.822   3
   7   6  11 2757.84 138.572   3
   6   7  11 2829.97 147.229   3
  -6   7  11 2748.56 139.348   1
  -6   7  11 2820.68 168.580   3
  -7   6  11 2894.52 136.739   1
  -7  -6 -11 2837.29 163.011   4
  -6  -7 -11 2929.38 161.286   4
  -7   6  11 2885.09 169.782   3
  -7   6  13-13.5963 70.5442   3
  -6   7  13 47.0391 57.6310   1
  -6   7  13 45.8328 68.9911   3
   7   6  13-10.0176 46.5557   3
   6   7  13 14.4207 53.3376   3
  -7   6  13 55.9481 48.8520   1
  -7   6  15 11664.5 370.228   3
  -6   7  15 10616.6 325.209   1
  -6   7  15 11535.3 371.841   3
  -7   6  15 10828.9 318.610   1
   6   7  15 10870.0 303.400   3
   6   7  15 11661.5 370.035   1
   7   6  15 11385.3 362.916   1
  -7   6  17 896.341 118.465   1
  -6   7  17 827.286 117.997   1
   7  -7   0 184742. 1589.05   4
   7  -7   0 188840. 1661.08   3
  -7   7   0 186229. 1646.70   3
  -7  -7   0 185385. 1537.63   2
   7  -7  -2 3877.95 147.481   3
   7  -7   2 3829.10 129.486   4
   7  -7   2 3398.80 148.794   2
  -7   7   2 3863.08 159.126   2
  -7   7  -2 3789.56 116.773   3
  -7   7   2 4265.47 150.474   3
  -7  -7  -4 45242.0 619.988   4
  -7   7  -4 44553.2 551.901   1
  -7   7  -4 45310.6 475.887   3
  -7   7   4 44954.2 606.188   3
   7  -7   4 45319.0 611.892   2
   7  -7   4 45710.5 587.172   4
  -7   7  -6 28425.8 437.158   1
  -7  -7  -6 27335.7 468.627   4
  -7   7  -6 28276.2 292.422   3
  -7   7   6 27319.1 470.507   3
   7   7   6 27508.3 335.233   2
  -7  -7  -8 86223.4 1015.30   4
   7   7   8 88248.6 970.776   3
  -7   7   8 86827.4 1032.68   3
  -7  -7 -10 209.827 63.5710   4
   7   7  10 326.655 66.9114   3
  -7   7  10 399.480 83.4238   3
   7   7  12 9980.97 278.624   3
  -7  -7 -12 10281.5 316.525   4
  -7   7  12 10929.5 285.354   1
  -7   7  12 11289.8 338.692   3
  -7   7  14 20075.2 432.492   1
   7   7  14 20526.7 417.897   3
  -7   7  14 20965.4 503.158   3
  -7   7  16 19236.3 455.548   1
  -8   0   0 351902. 2910.30   4
   8   0   0 357598. 2862.56   3
  -8   0   0 353402. 2815.19   2
   0  -8   0 348853. 2935.62   2
  -8   0  -2 8964.20 212.592   4
   8   0   2 9077.47 165.295   3
  -8   0   2 8852.73 196.812   3
   8   0   2 9221.29 143.891   1
   0   8   2 9454.83 216.397   2
   8   0  -2 9143.18 198.948   3
   8   0   4 50000.5 621.380   4
   0  -8  -4 47328.4 491.008   4
   0   8   4 47715.4 612.154   3
  -8   0   4 47246.1 586.368   3
   8   0   4 48736.3 486.846   2
   8   0   4 48688.7 514.376   1
   8   0  -4 49855.2 595.446   3
   0   8   4 48480.6 604.755   2
  -8   0  -4 47917.5 609.117   4
   8   0   6 51670.8 470.597   3
   8   0   6 51581.9 673.060   4
  -8   0   6 50658.4 640.998   3
   0   8   6 50328.1 663.050   3
  -8   0  -6 50698.1 661.824   4
   0  -8  -6 51518.5 520.078   4
   8   0   6 50695.1 581.397   1
   8   0   8 150006. 1418.68   1
   0   8   8 149273. 1494.42   3
   0   8  -8 147886. 1376.06   3
   8   0   8 151659. 1197.96   3
  -8   0  -8 149168. 1513.89   4
  -8   0   8 150487. 1478.60   3
   8   0  10 701.403 78.6761   1
   0   8 -10 731.176 66.3975   3
  -8   0  10 770.984 89.4285   3
   0   8  10 813.474 94.9471   3
   0   8 -12 7151.41 200.298   3
  -8   0  12 7325.32 253.256   3
   8   0  12 7138.55 240.637   1
   0   8  12 7237.46 254.386   3
  -8   0  14 32663.4 597.377   3
   8   0  14 33013.5 596.342   1
   0   8  14 31962.1 595.165   3
  -8   0  16 26447.3 557.387   3
   0   8  16 26368.9 576.058   1
   8   0  16 27468.1 573.643   1
   0   8  16 25579.8 548.445   3
   0   8  18 1739.65 157.536   3
  -8  -1   1 85961.7 875.328   4
  -8   1  -1 85520.8 868.283   4
  -8   1   1 85867.4 849.950   4
  -8   1   1 85802.6 825.290   2
   8   1  -1 86776.5 849.375   3
   1  -8  -1 86253.3 904.975   2
   8   1   1 85454.1 819.085   3
   8  -1   1 85387.0 712.002   1
  -8   1   1 86607.7 842.401   3
  -1  -8  -1 86964.1 882.667   2
   8  -1   1 84862.1 803.157   3
  -8  -1  -1 87138.5 887.372   4
  -8   1  -1 86439.5 805.686   3
  -1  -8   1 87074.3 877.340   2
   1  -8   1 85985.8 902.209   2
   8  -1  -1 86773.0 842.547   3
  -8   1   3 10613.9 224.610   3
   8   1  -3 10529.0 225.639   3
   8  -1   3 10438.2 238.701   4
   8   1   3 10169.1 177.808   3
  -1   8   3 10186.5 240.419   3
  -8  -1   3 10038.7 220.954   3
  -8  -1  -3 10311.1 235.051   4
   8   1  -3 10541.8 141.492   1
   8  -1  -3 10850.1 227.201   3
   1   8   3 10455.0 228.444   2
   8  -1   3 10145.9 167.178   1
  -1   8   3 10649.8 242.553   2
   8  -1   3 10152.1 162.086   3
  -8   1  -3 10679.0 234.209   4
   8  -1   3 10340.5 184.398   2
   8  -1  -5 86.5651 41.8216   3
   1  -8  -5 107.912 22.1041   4
   8   1   5 99.6226 34.8490   1
   8  -1   5 190.819 21.4519   3
  -8   1   5 100.064 45.4173   3
   8  -1   5 108.947 47.2657   4
   8   1  -5 104.368 42.6383   3
  -8  -1  -5 94.2179 47.2173   4
  -1  -8  -5 101.174 32.3413   4
   8  -1   5 66.9394 32.5908   1
   1   8   5 110.588 46.8123   2
  -1   8   5 110.133 45.7466   2
  -1   8   5 123.957 57.3636   3
   8   1   5 54.0614 42.1007   4
  -8   1  -5 126.548 55.0289   4
  -8  -1   5 103.244 48.5599   3
   8   1  -5 87.8694 24.2359   1
   8   1   5 96.9350 25.2611   3
   1   8   5 32.0463 48.5550   3
  -8   1   7 76933.0 879.556   3
   8  -1   7 77685.4 817.361   1
   1   8   7 77362.8 896.885   3
  -1   8   7 77403.8 901.101   3
   8   1  -7 77324.0 753.933   1
   8   1   7 77198.4 824.967   1
  -8   1  -7 77748.5 907.690   4
  -8  -1  -7 76994.5 908.285   4
  -8  -1   7 78350.4 879.669   3
  -1  -8  -7 77451.9 766.190   4
   1   8   9 21757.8 418.629   3
   1   8  -9 21554.0 358.683   3
  -1   8  -9 20921.5 328.199   3
  -8  -1   9 21817.7 409.702   3
  -8   1   9 21385.5 408.200   3
   8  -1   9 21702.0 379.275   1
   8   1   9 22080.1 260.360   3
  -1   8   9 21676.0 420.798   3
  -8  -1  -9 21663.7 434.671   4
   8   1   9 21573.7 381.935   1
   8   1  11 7293.15 231.736   1
   1   8 -11 6687.79 198.054   3
  -1   8 -11 6679.62 177.756   3
  -8   1  11 6951.70 238.244   3
  -8  -1  11 6949.71 238.365   3
  -1   8  11 7019.89 244.350   3
   1   8  11 6895.94 237.802   3
   8  -1  11 6880.22 224.500   1
   8   1  11 7091.34 120.601   3
   8   1  13 828.613 93.7809   1
  -1   8  13 894.942 105.491   3
   8  -1  13 799.119 94.8556   1
  -8   1  13 903.053 106.392   3
  -8  -1  13 981.477 106.518   3
   1   8  13 914.880 107.896   3
   8  -1  15 28183.8 564.770   1
  -8   1  15 27956.3 564.415   3
  -8  -1  15 28260.9 562.474   3
   1   8  15 28656.9 585.894   1
  -1   8  15 27815.5 576.943   1
   1   8  15 27461.3 551.252   3
  -1   8  15 27412.3 563.698   3
   8   1  15 27526.1 558.952   1
  -8   1  17 1889.94 158.998   3
  -1   8  17 1950.07 164.407   3
  -8  -1  17 1683.81 151.093   3
   1   8  17 1760.53 152.291   3
  -1   8  17 1869.25 163.884   1
   2  -8   0 8530.72 218.412   2
  -8  -2   0 8867.90 126.456   2
  -8   2   0 8624.78 174.658   3
  -2   8   0 8693.43 199.351   3
   8   2   0 8403.77 182.367   3
   8  -2   0 8248.85 172.727   3
  -8   2   0 8699.99 184.542   2
  -8   2   0 8797.22 189.061   4
  -2  -8   0 8898.46 197.883   2
  -8  -2   0 8667.14 209.538   4
  -8   2   2 3457.23 110.801   4
   8  -2   2 3413.21 112.384   2
  -8   2   2 3237.55 117.035   3
   8  -2   2 3580.75 131.383   4
   8   2  -2 3373.94 121.694   3
  -8  -2  -2 3704.80 140.302   4
  -2   8   2 3469.22 135.324   3
  -8   2  -2 3342.75 93.1623   3
   8   2   2 3436.71 106.928   3
   8  -2   2 3488.83 95.5481   3
   8  -2  -2 3500.58 121.009   3
   2  -8   2 3398.43 136.741   2
  -2   8   2 3695.98 141.958   2
  -8   2  -2 3310.09 124.166   4
   8   2  -4 1114.20 78.8139   3
   2  -8  -4 952.122 35.1952   4
   8  -2   4 912.514 55.9794   1
   8   2  -4 1023.28 52.5527   1
   8  -2   4 1009.84 81.5093   4
  -8  -2  -4 1037.43 88.1916   4
  -8   2   4 1025.52 81.2176   3
  -2   8   4 963.746 84.6574   3
   8  -2   4 940.541 41.8460   3
   8  -2  -4 1069.17 79.4196   3
  -2  -8  -4 973.227 65.4784   4
  -2   8   4 944.873 82.2069   2
   8  -2   4 960.398 63.9567   2
  -8   2  -4 982.697 80.1261   4
   8   2   4 1069.02 36.2041   2
   2   8   4 1268.44 81.6648   2
  -2  -8  -6 2524.31 102.405   4
  -8   2   6 2504.89 125.213   3
   2   8   6 2602.41 117.476   2
   8   2  -6 2585.97 91.2375   1
  -8   2  -6 3001.17 140.459   4
   8  -2   6 2669.32 134.333   4
   2   8   6 2622.91 130.899   3
  -2   8   6 2477.37 129.520   3
  -8  -2   6 2484.21 122.792   3
   8  -2   6 2485.28 102.356   1
  -8  -2  -6 2533.40 130.232   4
  -8   2   8 5185.83 190.044   3
   8   2   8 5164.60 130.871   3
   2   8   8 5109.37 191.752   3
   2   8  -8 5373.38 169.978   3
  -8  -2  -8 5463.93 203.649   4
  -8  -2   8 5148.59 184.874   3
  -2   8  -8 5165.68 137.924   3
  -2   8   8 4946.52 192.782   3
   8   2   8 4988.71 167.920   1
   8  -2   8 5209.91 167.319   1
   8   2  -8 4991.50 146.952   1
  -2  -8  -8 5197.53 153.346   4
  -8   2  10 1253.59 107.261   3
  -2   8 -10 1053.00 66.9696   3
   8   2  10 1227.01 64.6807   3
   8   2 -10 1109.46 83.1011   1
  -2   8  10 1133.53 106.446   3
   2   8  10 1206.36 105.912   3
  -8  -2  10 969.799 96.7325   3
  -8  -2 -10 1182.27 109.287   4
  -8   2  10 1166.22 81.2371   1
   8   2  10 1169.87 97.4565   1
   8  -2  10 1196.35 97.4894   1
  -2   8  12 469.116 87.8643   3
  -8   2  12 404.831 78.8430   3
   8  -2  12 326.816 71.2768   1
  -8  -2  12 398.732 78.0659   3
   8   2  12 493.990 44.3324   3
   2   8  12 448.755 83.2225   3
   8   2  12 480.406 76.8966   1
  -2   8  14 1020.05 116.756   3
   8  -2  14 1091.99 110.964   1
  -8   2  14 1056.40 116.351   3
  -8  -2  14 871.618 104.788   3
   2   8  14 1090.20 115.959   3
   8   2  14 969.283 109.606   1
   2   8  16 1332.78 143.121   1
  -2   8  16 1318.00 138.807   1
  -8  -2  16 1418.33 133.761   3
  -8   2  16 1426.47 139.309   3
   2   8  16 1407.97 130.935   3
   8   2  16 1412.95 136.270   1
  -2   8  16 1636.61 149.847   3
   2   8  18 168.838 86.2568   3
  -8   3   1 9921.06 193.304   4
  -8   3  -1 10271.9 209.761   4
  -8   3   1 9923.68 204.046   3
   8  -3   1 9952.94 213.860   4
  -8  -3  -1 9875.30 233.357   4
   3  -8  -1 10092.5 243.987   2
   3  -8   1 9523.98 235.062   2
  -3   8  -1 10108.3 214.857   3
   8   3   1 9946.72 201.139   3
  -3   8   1 10230.8 227.235   3
   8   3  -1 9981.19 211.956   3
  -3  -8  -1 9972.56 206.519   2
   8  -3   1 10106.6 186.051   3
   8  -3  -1 9929.90 204.789   3
  -3  -8   1 10325.4 208.780   2
  -3   8   1 9951.84 241.313   2
  -8   3  -1 10185.9 182.874   3
  -8   3   1 10030.6 218.052   2
  -8   3   3 32055.4 442.892   3
   8  -3   3 32606.1 457.662   4
  -8   3   3 31938.8 382.746   4
  -3   8   3 33693.7 491.768   2
   8   3  -3 32761.0 451.085   3
  -8  -3  -3 31788.8 471.904   4
  -3   8   3 32398.6 466.593   3
  -8   3  -3 31607.0 341.784   3
   8  -3   3 31618.1 346.360   3
   8  -3  -3 32553.0 447.576   3
   3  -8   3 31814.3 468.922   2
   3   8   3 30938.8 415.026   2
  -8   3  -3 32192.6 447.930   4
   8  -3   3 32052.8 422.705   2
   3   8   5 10180.7 222.423   2
  -8   3   5 9802.03 239.655   3
   8  -3   5 10405.7 252.790   4
  -3  -8  -5 9978.59 218.320   4
  -3   8   5 10271.1 258.753   2
  -8   3   5 10464.7 184.859   4
  -8  -3  -5 9998.67 252.361   4
  -3   8   5 10490.0 257.378   3
  -8   3   5 10465.5 150.376   1
   8  -3  -5 10446.5 246.765   3
   8   3  -5 10570.0 245.933   3
  -8   3  -5 9884.96 243.901   4
  -8   3   7 13267.4 301.294   3
  -8  -3  -7 13574.5 315.751   4
   8   3  -7 13685.5 248.272   1
   3   8   7 13581.4 306.019   3
   3   8  -7 13900.5 284.360   3
  -8   3   7 13959.0 220.362   1
  -3   8   7 13759.0 316.437   3
  -3  -8  -7 13509.2 268.054   4
  -8  -3  -9 223.702 71.7886   4
  -3  -8  -9 278.226 53.5065   4
  -8   3   9 222.379 42.7482   1
  -8   3   9 220.709 64.0983   3
   8   3   9 286.500 44.0714   3
  -3   8  -9 228.017 35.7827   3
   8   3  -9 210.377 47.2759   1
  -3   8   9 241.246 69.8907   3
   3   8   9 208.779 65.3084   3
  -8   3  11 17706.0 395.997   3
   3   8  11 18102.9 394.483   3
   8   3  11 18654.6 288.680   3
  -8  -3 -11 17793.8 415.072   4
  -3   8  11 18160.0 409.626   3
   8   3  11 18166.8 386.826   1
  -8   3  11 17622.2 330.362   1
  -3   8 -11 17049.3 266.965   3
  -8   3  13-33.9095 62.2635   3
   8   3  13-35.4309 58.2058   1
  -8   3  13 65.9601 52.8621   1
   3   8  13-23.1364 64.1027   3
  -3   8  13-39.2100 67.1538   3
   8   3  15 3722.59 201.711   1
  -8   3  15 3956.67 212.555   3
   3   8  15 3968.87 198.044   3
  -3   8  15 4013.71 211.618   1
  -3   8  15 3769.31 215.757   3
  -3   8  17 610.572 110.741   3
  -3   8  17 299.303 85.6427   1
   3   8  17 486.033 96.5046   3
  -8   4   0 43449.9 497.432   3
   4  -8   0 42420.8 576.705   2
  -4   8   0 43654.6 534.559   3
   8  -4   0 43509.4 501.023   3
  -8   4   0 42827.5 493.661   4
  -8   4   0 42227.8 386.647   1
   8   4   0 42764.5 521.498   3
   8  -4   0 42423.8 505.755   4
  -8   4   0 42796.8 539.970   2
  -4  -8   0 43521.7 501.678   2
  -4   8   2 822.031 80.8649   2
   8  -4   2 750.798 65.5529   4
  -8   4  -2 741.133 42.8400   1
  -8   4  -2 764.444 65.5541   4
  -8  -4  -2 788.801 77.7456   4
   4  -8   2 666.123 74.5962   2
  -4   8  -2 769.388 61.6058   3
   8  -4   2 778.232 70.4286   2
  -8   4   2 742.966 72.0648   2
   8   4  -2 820.189 68.0831   3
   8  -4   2 721.141 50.4089   3
   8  -4  -2 838.319 67.4412   3
  -4   8   2 756.922 71.6288   3
  -8   4  -2 734.232 49.5784   3
   4  -8  -2 728.811 34.8988   4
  -8   4   2 799.936 68.6370   3
  -8   4   2 791.198 54.2004   4
   8  -4   4 40120.8 537.371   4
  -8   4   4 38721.7 525.950   3
  -8  -4  -4 38810.6 552.036   4
  -8   4   4 39249.5 420.181   4
   8   4  -4 39714.6 531.524   3
  -4   8  -4 38461.3 454.773   3
   8  -4   4 37883.5 386.135   3
  -8   4  -4 38878.8 376.185   3
  -4   8   4 38793.2 543.805   3
   8  -4  -4 39493.8 533.863   3
  -4  -8  -4 38574.9 511.700   4
  -8   4  -4 38042.6 448.511   1
  -8   4   4 38727.1 368.736   1
  -4   8   4 40009.9 566.808   2
   4   8   4 38301.9 469.689   2
   8  -4   4 39168.2 502.260   2
  -4  -8  -6 3656.13 140.755   4
   4   8   6 4087.54 136.127   2
   8   4  -6 3906.45 130.274   1
  -8   4   6 4094.17 102.413   4
  -4   8   6 3949.07 163.717   3
  -8   4   6 4054.39 161.439   3
  -8   4   6 3728.35 99.0571   1
  -8  -4  -6 3757.78 162.685   4
  -8   4   8 18330.9 377.293   3
  -8   4   8 18812.4 288.497   1
   8   4   8 19131.3 316.628   3
   4   8   8 18734.7 374.624   3
   8   4  -8 18704.1 325.509   1
  -4   8  -8 18458.6 256.397   3
  -8  -4  -8 18306.4 386.344   4
  -4   8   8 19336.5 393.100   3
  -4  -8  -8 18877.4 346.166   4
  -8   4  10 5053.92 206.434   3
  -4  -8 -10 4685.68 175.281   4
  -8  -4 -10 4963.03 211.759   4
  -8   4  10 4692.80 154.237   1
   8   4  10 4833.90 154.214   3
   4   8  10 4616.79 189.293   3
  -4   8 -10 4790.84 114.748   3
  -4   8  10 4884.56 208.295   3
  -8   4  12 9774.00 304.477   3
   4   8  12 9791.47 285.303   3
  -8   4  12 9636.12 248.761   1
   8   4  12 9747.34 289.393   1
  -4   8  12 9852.16 310.078   3
  -8   4  14 4806.66 230.560   3
   4   8  14 4876.09 211.798   3
  -4   8  14 4702.62 217.175   1
  -8   4  14 4826.38 196.589   1
  -4   8  14 4780.07 234.159   3
   8   4  14 4479.28 215.612   1
  -8   4  16 2042.24 145.516   1
   8   4  16 2377.39 171.953   1
  -8   4  16 2605.06 181.330   3
   4   8  16 2631.53 165.932   3
  -4   8  16 2357.41 171.042   1
  -4   8  16 2267.82 176.442   3
   8  -5   1 729.419 62.8336   4
  -8   5  -1 293.008 40.7765   3
  -8   5  -1 335.060 32.9111   1
  -8   5   1 336.333 55.8810   2
   5  -8  -1 434.866 35.7699   4
  -8   5   1 401.461 51.6405   3
   5  -8   1 305.017 38.4881   4
   5  -8   1 368.742 65.2928   2
   8  -5   1 294.821 42.0243   3
  -5   8  -1 320.091 46.8538   3
  -5  -8  -1 643.977 52.5028   2
   8  -5  -1 431.236 57.1134   3
  -5   8   1 408.126 58.7344   3
  -5   8   1 381.755 67.7971   2
  -8   5  -1 326.536 49.4889   4
  -8   5   1 374.905 43.5922   4
  -8   5   3 6710.30 201.006   2
  -8   5   3 6576.03 186.813   3
  -8   5  -3 6687.13 148.509   1
  -8   5  -3 6698.09 134.653   3
   8  -5   3 6864.95 188.027   4
  -8   5   3 6803.48 134.044   4
  -5   8  -3 6516.93 158.210   3
   5  -8   3 6619.22 175.056   4
   8  -5   3 6870.45 142.260   3
   8   5  -3 6849.87 191.700   3
   8  -5  -3 6863.17 193.313   3
  -8  -5  -3 6713.03 207.219   4
  -5   8   3 6810.40 214.386   2
  -5   8   3 6663.56 196.947   3
   5  -8  -3 6978.98 204.517   3
   5  -8   3 6510.89 202.090   2
  -5  -8  -3 6641.03 194.214   4
   8  -5   3 6602.35 189.467   2
  -8  -5  -5 1459.25 104.818   4
   5   8   5 1447.49 77.2623   2
  -8   5  -5 1548.28 42.0966   3
  -5   8  -5 1567.29 72.3268   3
  -8   5  -5 1515.22 81.8892   1
  -8   5   5 1606.13 57.1254   4
  -5   8   5 1498.78 105.425   3
   8  -5   5 1479.47 96.4251   2
  -5  -8  -5 1507.00 98.5763   4
  -8   5   5 1327.28 96.7684   3
   8  -5   5 1482.05 100.329   4
  -5  -8  -7 1426.55 99.3360   4
   5   8   7 1445.43 85.4973   2
   8   5  -7 1342.29 87.5625   1
   5   8   7 1236.69 99.8746   3
  -5   8  -7 1414.81 63.2827   3
  -5   8   7 1501.06 113.593   3
  -8   5  -7 1353.22 90.7310   1
  -8   5   7 1353.70 70.2158   1
  -8   5   7 1504.04 54.8437   4
  -8   5   7 1282.43 101.611   3
  -8  -5  -7 1493.75 113.531   4
  -5  -8  -9 576.691 75.8814   4
  -5   8  -9 628.895 37.4154   3
  -8   5   9 681.989 86.6013   3
  -5   8  -9 694.071 40.9653   3
   8   5   9 682.424 70.9634   3
  -8  -5  -9 587.529 84.7569   4
   5   8   9 544.514 75.8772   3
  -5   8   9 559.010 86.3600   3
  -8   5   9 654.615 60.8518   1
  -5  -8 -11 3008.27 153.608   4
  -8  -5 -11 2734.38 166.733   4
  -8   5  11 2918.86 131.344   1
  -8   5  11 2998.00 169.209   3
   8   5  11 2319.98 118.658   3
   5   8  11 2991.60 158.394   3
  -5   8  11 3159.05 176.245   3
  -5   8  13 3.12980 56.7307   1
   8   5  13-55.7445 68.6136   1
  -5   8  13-12.7885 68.3980   3
  -8   5  13 6.28177 66.4752   3
  -8   5  13 43.8159 49.4550   1
   5   8  13 0.76930 57.2696   3
   8   5  13 97.3638 43.9191   3
  -5   8  15 421.938 106.203   3
   5   8  15 279.747 79.4053   3
  -8   5  15 164.093 64.2342   1
  -8   5  15 482.094 99.6656   3
  -5   8  15 361.456 88.4876   1
   8   5  15 210.585 65.9091   1
  -8   5  17 642.812 101.659   1
  -5   8  17 572.922 105.403   1
   8  -6   0 50010.0 564.197   4
   6  -8   0 52198.8 677.036   2
   8  -6   0 50900.4 596.979   3
  -6   8   0 51472.1 607.419   3
   6  -8   0 50188.2 535.205   4
  -8  -6   0 51213.7 460.769   2
  -8   6   0 50589.6 585.818   3
  -6  -8   0 50922.4 543.816   2
   8  -6   2 2841.83 117.277   4
   8  -6   2 3272.89 140.643   2
   6  -8   2 2792.67 137.987   2
   6  -8  -2 2862.51 72.8443   4
  -8  -6  -2 2949.30 142.472   4
   8  -6   2 2862.09 103.317   3
   8  -6  -2 3073.56 129.634   3
  -6   8  -2 2863.30 107.540   3
   6  -8  -2 3045.23 134.034   3
  -6   8   2 2988.51 130.110   3
  -8   6  -2 2832.36 96.3463   1
  -8   6   2 2979.22 126.794   3
  -8   6  -2 2866.11 100.214   3
   6  -8   2 2912.83 110.769   4
  -8   6   2 2777.95 135.870   2
  -8   6   4 4419.88 91.3233   4
  -8  -6  -4 4204.72 172.015   4
  -6  -8  -4 4212.51 164.912   4
  -8   6  -4 4184.79 132.619   1
  -6   8  -4 4441.76 122.118   3
  -6   8   4 4381.80 167.918   3
   6  -8   4 4281.86 169.662   2
  -8   6   4 4163.52 160.839   3
   8  -6   4 4279.75 161.673   2
   6  -8   4 4365.53 152.707   4
  -8   6  -4 4369.15 103.650   3
   8  -6   4 4543.10 162.721   4
  -8   6   6 6586.88 216.946   3
  -8  -6  -6 6372.93 218.855   4
  -8   6   6 6585.01 89.7047   4
  -6   8  -6 6311.54 133.952   3
  -6   8   6 6652.93 218.346   3
  -6  -8  -6 6307.70 207.503   4
   8   6   6 6609.68 109.362   2
   6   8   6 6344.27 157.635   2
  -8   6  -6 6465.10 185.575   1
   6   8   8 31896.7 440.498   2
   6   8   8 33562.2 523.721   3
  -6   8  -8 32152.2 325.287   3
  -6   8  -8 32853.4 329.978   3
  -8   6   8 32452.4 430.509   1
  -8   6   8 31928.2 543.934   3
  -6   8   8 32668.8 551.576   3
  -8  -6  -8 32662.3 546.146   4
  -6  -8  -8 32207.0 520.645   4
  -8  -6 -10 13.4563 66.2624   4
  -6   8  10 38.5230 59.4844   3
  -8   6  10 47.2961 16.4047   4
  -8   6  10 99.1188 66.6342   3
  -8   6  10 13.7950 38.8058   1
   8   6  10 97.1758 51.0918   3
   6   8  10-32.1120 61.7941   3
  -6  -8 -10 26.5931 56.1126   4
  -8   6  12 1402.08 103.067   1
   6   8  12 1316.79 114.103   3
   8   6  12 1453.24 102.911   3
  -8   6  12 1388.39 130.512   3
  -6   8  12 1424.31 114.772   1
  -6   8  12 1427.73 137.470   3
  -6  -8 -12 1302.76 115.257   4
  -8  -6 -12 1429.06 132.540   4
  -8   6  14 6664.19 235.356   1
   6   8  14 6467.50 241.710   3
   8   6  14 6421.52 263.508   1
  -6   8  14 6795.14 255.536   1
  -6   8  14 7110.73 291.946   3
  -8   6  14 6639.75 277.843   3
  -6   8  16 6001.68 259.228   1
  -8   6  16 6099.11 246.868   1
   8  -7   1 84661.6 852.207   4
   7  -8  -1 83700.1 785.322   4
   7  -8   1 84317.4 964.023   2
  -7   8  -1 84463.9 864.063   3
   8  -7  -1 83411.9 805.873   4
   8  -7   1 83301.6 946.630   2
   7  -8  -1 86403.9 915.359   3
   8  -7   1 84138.2 862.121   3
   8  -7  -1 84158.1 903.095   3
  -7   8   1 84854.0 900.976   3
  -8   7  -1 84210.8 849.653   3
  -8   7   1 84453.8 890.580   3
   7  -8   1 83604.1 839.352   4
  -8  -7  -3 14119.9 321.992   4
  -7  -8  -3 14346.5 316.967   4
   7  -8   3 13883.9 314.909   2
   7  -8   3 14241.9 278.963   4
   8  -7  -3 14670.7 311.909   3
  -7   8  -3 14266.1 243.859   3
  -7   8   3 14279.7 304.268   3
  -8   7   3 14036.5 297.687   3
  -8   7  -3 14108.2 232.636   3
   8  -7   3 13808.7 310.797   2
  -8   7  -3 13976.5 254.616   1
   8  -7   3 13811.2 283.346   4
  -7  -8  -5 2084.44 126.031   4
  -8   7  -5 2228.33 71.0204   3
  -7   8  -5 2048.36 110.454   1
  -8   7  -5 2024.21 104.674   1
  -8  -7  -5 1955.30 126.791   4
  -7   8  -5 2104.29 78.7500   3
  -7   8   5 2014.57 123.698   3
   7  -8   5 1855.67 120.443   2
  -8   7   5 2002.52 123.470   3
   8  -7   5 2181.79 125.904   2
  -8  -7  -7 84448.8 1015.95   4
  -7  -8  -7 85794.5 1006.01   4
  -7   8  -7 87291.6 744.774   3
   7   8   7 85364.0 842.679   2
   8   7   7 86564.5 790.953   2
  -7   8   7 85367.2 1022.48   3
  -8   7   7 86534.5 1023.85   3
   8   7   9 23878.2 427.858   3
  -8  -7  -9 23801.9 470.916   4
   7   8   9 23318.8 436.153   3
  -7  -8  -9 22291.0 443.226   4
  -7   8   9 23016.2 472.758   3
  -8   7   9 22129.2 465.494   3
   7   8  11 12141.0 316.457   3
  -7  -8 -11 11766.7 327.130   4
  -8   7  11 11773.3 278.852   1
  -7   8  11 11750.7 349.658   3
  -8  -7 -11 11483.8 334.136   4
  -8   7  11 11779.7 344.257   3
  -7   8  13 998.044 124.598   3
  -8   7  13 1000.25 120.892   3
  -8   7  13 889.361 93.0736   1
  -7   8  13 832.855 92.3807   1
   7   8  13 996.518 105.874   3
   8   7  13 830.296 90.6302   3
  -7   8  15 29478.9 571.214   1
  -8   7  15 31325.3 654.411   3
  -8   7  15 30656.8 561.893   1
   7   8  15 31556.3 644.281   1
   8   7  15 31228.5 640.335   1
  -7   8  15 31648.0 659.205   3
  -7   8  17 1648.51 154.628   1
  -8   8   0 133858. 1282.53   3
   8  -8   0 133627. 1300.30   3
  -8  -8   0 134857. 1157.63   2
   8  -8   2 6631.68 180.689   4
  -8  -8  -2 6404.23 217.042   4
  -8   8  -2 6578.94 167.548   3
  -8   8   2 6497.93 197.790   3
   8  -8  -2 6371.55 200.429   3
   8  -8   2 5872.35 207.802   2
  -8  -8  -4 19652.1 398.232   4
   8  -8   4 19782.6 361.654   4
   8  -8   4 18628.0 382.227   2
  -8   8  -4 19824.2 284.199   3
  -8   8   4 19749.2 382.891   3
  -8   8  -4 19133.2 335.042   1
  -8  -8  -6 24361.3 465.314   4
   8  -8   6 24784.6 457.967   2
  -8   8   6 24917.0 464.490   3
  -8   8  -6 25169.9 288.464   3
   8   8   8 74555.7 742.911   2
  -8   8   8 73627.2 956.149   3
  -8  -8  -8 75192.2 947.981   4
  -8  -8 -10 347.777 83.7406   4
  -8   8  10 616.474 98.9814   3
   8   8  10 421.871 76.8367   3
   8   8  12 3348.03 170.946   3
  -8  -8 -12 3205.29 185.817   4
  -8   8  12 3286.03 157.764   1
  -8   8  12 3352.87 198.258   3
  -8   8  14 19278.1 423.116   1
  -8   8  14 20298.2 509.188   3
   8   8  14 19060.9 419.776   3
   0  -9  -1 30804.9 461.862   2
   9   0   1 32086.3 398.862   3
  -9   0   1 31247.1 384.413   2
  -9   0   1 31211.5 438.718   4
  -9   0  -1 31767.8 454.891   4
  -9   0   1 31281.3 423.316   3
   9   0   1 32425.6 315.116   1
   0  -9   1 31688.6 463.307   2
  -9   0  -3 426.888 65.5667   4
   9   0   3 437.454 65.7332   4
   0   9   3 391.825 57.6094   2
   9   0   3 355.846 38.5606   3
   0   9   3 322.469 63.7819   3
   9   0   3 405.417 38.0739   1
  -9   0   3 308.071 53.4157   3
   9   0  -3 773.900 70.7235   3
  -9   0  -5 322.026 66.2065   4
   0  -9  -5 237.543 34.7096   4
   9   0   5 247.587 34.0840   2
   0   9   5 174.498 55.1703   2
   9   0   5 176.203 26.7834   3
   0   9   5 255.981 57.5706   3
  -9   0   5 244.014 57.7539   3
   9   0   5 249.447 41.6990   1
   0  -9  -7 37828.6 422.962   4
   9   0   7 37876.0 361.661   3
  -9   0   7 37185.8 552.941   3
   0   9   7 37514.0 575.969   3
   9   0   7 37762.1 495.768   1
  -9   0  -7 37072.3 576.356   4
   9   0   9 9439.12 241.568   1
  -9   0   9 9461.86 269.199   3
   0   9  -9 9034.65 218.888   3
   0   9   9 9480.15 278.401   3
  -9   0  -9 9360.98 283.435   4
   0   9 -11 221.796 51.2796   3
   9   0  11 282.384 69.7717   1
  -9   0  11 313.010 71.9811   3
   0   9  11 239.650 75.8526   3
  -9   0  13 1342.22 127.557   3
   9   0  13 1420.59 121.233   1
   0   9  13 1360.27 127.588   3
  -9   0  15 12969.6 377.514   3
   9   0  15 12914.4 372.110   1
   0   9  15 12480.0 375.084   3
   0   9  17 674.367 112.875   3
   9   1   0 36198.8 447.970   3
  -9   1   0 35257.1 467.649   4
  -9  -1   0 34695.1 483.167   4
   1  -9   0 34775.3 504.667   2
  -9   1   0 35911.5 438.830   3
  -9   1   0 34740.4 421.377   2
  -9  -1   0 34885.0 375.074   2
   9  -1   0 35307.2 436.553   3
  -1  -9   0 35322.2 489.484   2
  -9   1   2 2941.26 113.221   4
  -9  -1  -2 2916.75 131.333   4
   9   1  -2 3041.62 120.702   3
   9   1   2 3126.13 103.741   3
  -1   9   2 3002.17 132.322   3
  -9   1   2 2993.31 118.396   3
   9  -1   2 3015.97 76.0074   1
  -1   9   2 3392.97 139.458   2
   1  -9   2 3143.15 135.127   2
   9  -1   2 3206.29 133.767   4
   9  -1  -2 3298.06 123.553   3
   9  -1   2 3099.77 96.7956   3
  -9   1  -2 3277.90 132.980   4
   9  -1   4 1586.04 103.897   4
   1  -9  -4 1581.75 60.5285   4
  -1  -9  -4 1548.88 77.6551   4
   9  -1   4 1584.69 60.6681   3
   9  -1   4 1525.43 73.5059   2
  -9   1   4 1520.08 95.1200   3
  -1   9   4 1639.50 106.831   3
   9   1   4 1710.96 58.2758   2
   1   9   4 1500.44 100.741   3
   9  -1   4 1665.95 72.6031   1
  -9  -1   4 1503.35 97.0645   3
   9   1   4 1622.29 69.6362   3
   9   1   4 1711.21 109.425   4
   9  -1  -4 1658.78 98.8330   3
   1   9   4 1661.11 99.2738   2
  -9   1  -4 1630.24 104.802   4
  -1   9   4 1658.36 104.354   2
   9   1  -4 1561.87 52.5290   1
   9   1  -4 1630.48 97.3196   3
  -9  -1  -4 1516.98 102.346   4
  -1  -9  -6 6545.34 157.634   4
   1   9   6 7103.93 207.406   2
  -9   1  -6 6906.89 218.413   4
  -9   1   6 6807.00 207.553   3
  -9  -1  -6 6937.95 220.965   4
   1   9   6 6897.02 217.716   3
   9  -1   6 7109.05 174.124   1
  -1   9   6 7286.60 225.796   3
   9   1   6 6875.24 135.954   3
   1  -9  -6 7116.53 123.957   4
   9   1  -6 6859.14 139.157   1
   9   1   6 7064.74 177.388   1
   9  -1   6 6920.10 103.266   3
  -9  -1   6 6705.01 204.841   3
  -9   1  -8 18418.6 394.650   4
  -9   1   8 18298.7 376.773   3
   9   1   8 18941.6 248.878   3
   1   9   8 18116.4 384.267   3
  -9  -1   8 18264.5 374.075   3
   9  -1   8 18486.2 334.724   1
  -1   9   8 19467.6 396.832   3
   9   1   8 19611.0 238.016   3
   1   9  -8 18162.0 331.064   3
   9   1   8 18536.3 339.103   1
  -9  -1  -8 18325.6 396.972   4
  -1  -9  -8 18747.4 292.489   4
   9   1  10 110.487 53.9352   1
  -9  -1 -10-3.68120 68.6472   4
  -9   1  10 133.081 60.7744   3
  -1   9 -10 68.1452 36.2999   3
  -9  -1  10-3.49182 57.7282   3
   1   9  10 37.6114 57.7086   3
  -1   9  10 68.5773 60.9002   3
   9   1  10 76.1387 21.2326   3
   9  -1  10 105.901 51.9600   1
   9   1  12 304.251 72.4943   1
   9  -1  12 212.980 64.7050   1
  -9   1  12 288.355 74.9678   3
  -9  -1  12 243.110 75.2101   3
   1   9  12 216.223 74.2384   3
  -1   9  12 315.249 80.7143   3
  -9   1  14 5465.87 241.503   3
   9   1  14 5510.17 235.132   1
   1   9  14 4953.56 229.239   3
  -1   9  14 5369.05 242.726   3
   9  -1  14 5009.24 223.651   1
  -9  -1  14 5317.95 236.321   3
   9  -1  16 2823.20 185.345   1
  -9   1  16 2950.39 188.646   3
   9   1  16 3242.38 197.250   1
   1   9  16 2829.23 197.089   1
  -1   9  16 2861.51 194.363   1
   1   9  16 2717.62 183.936   3
  -1   9  16 2706.05 188.468   3
  -9  -1  16 3386.08 197.847   3
   1   9  18-40.5811 91.3462   3
  -2  -9  -1 3118.05 125.744   2
   2  -9  -1 3099.53 138.996   2
  -9   2  -1 3186.59 125.321   4
   9   2  -1 3228.80 120.785   3
  -9   2   1 3034.81 114.173   3
  -9  -2   1 3295.34 135.965   4
   9   2   1 3198.43 111.855   3
  -9   2  -1 3058.38 102.113   3
  -9  -2  -1 2992.09 132.184   4
  -2   9   1 3131.81 134.275   3
  -9   2   1 2866.57 112.351   2
   9  -2   1 3128.85 103.753   3
   9  -2  -1 3024.75 114.086   3
  -2  -9   1 3141.14 126.341   2
  -9   2   1 3122.94 116.897   4
   2  -9   1 3178.44 138.395   2
  -9   2  -3 216.453 54.2369   4
   2  -9   3 211.559 56.4983   2
  -9  -2  -3 305.793 63.4134   4
  -9   2   3 270.592 46.4353   4
   9  -2   3 225.999 52.9528   4
  -2   9   3 206.267 54.9937   2
   9  -2   3 229.974 32.1186   3
   9   2  -3 296.491 50.3768   3
   2   9   3 273.149 51.4410   2
   9  -2   3 219.834 43.1267   2
  -2   9   3 199.437 58.5638   3
  -9   2   3 325.375 55.8105   3
   9   2   3 243.502 37.6519   3
   9  -2  -3 294.782 50.0343   3
   9  -2   5 388.030 48.0670   2
   2   9   5 313.919 65.6605   3
  -9   2  -5 346.681 64.1324   4
  -9   2   5 358.880 62.3355   3
   9  -2   5 389.827 28.4922   3
  -2   9   5 812.708 82.0611   3
   9   2  -5 420.207 39.0590   1
  -9  -2  -5 280.691 63.2900   4
   9   2   5 434.534 28.3253   2
   2   9   5 420.685 61.5962   2
  -2  -9  -5 426.597 52.3462   4
   2  -9  -5 453.481 24.9155   4
   9  -2   5 381.162 46.6979   1
  -9   2   7 3229.06 150.325   3
  -9   2  -7 3017.86 155.173   4
   2   9   7 3374.42 144.425   2
   2   9   7 3376.43 158.668   3
  -2   9   7 3427.63 159.773   3
  -9  -2  -7 3281.14 161.895   4
  -9  -2   7 3209.15 149.523   3
   9   2   7 3145.74 128.762   1
   9  -2   7 3253.84 127.483   1
   9   2  -7 3274.21 108.373   1
  -2  -9  -7 3398.93 123.069   4
   9  -2   9 1178.75 93.0692   1
   9   2   9 1114.26 64.1666   3
  -2   9  -9 1048.88 69.7083   3
  -9   2   9 1114.02 104.402   3
  -9  -2   9 1234.90 104.117   3
   2   9   9 1024.12 103.799   3
  -2  -9  -9 1104.76 78.2615   4
   9   2  -9 1044.45 74.4497   1
  -2   9   9 1022.74 103.560   3
   9   2   9 982.528 87.2328   1
  -9  -2  -9 1128.27 111.424   4
  -2   9 -11 101.841 35.2952   3
  -9   2  11 85.6120 67.2086   3
   9  -2  11 176.733 62.2204   1
   9   2  11 163.335 57.2617   1
  -9  -2  11 138.686 62.4792   3
   2   9  11 203.089 75.7468   3
   9   2  11 156.512 31.0223   3
  -2   9  11 92.6801 61.1674   3
   9   2  13 16.7335 56.1438   1
  -2   9  13-90.0006 77.9491   3
  -9   2  13 202.081 82.4879   3
  -9  -2  13-34.1105 67.9961   3
   2   9  13-14.1632 81.8272   3
   9  -2  13-40.2686 67.0334   1
  -2   9  15 1293.09 140.329   3
  -2   9  15 1091.83 130.164   1
   9   2  15 1003.35 116.282   1
  -9   2  15 1091.66 124.137   3
  -9  -2  15 1038.13 118.587   3
   2   9  15 1024.35 119.732   3
   2   9  17 133.330 83.4455   3
  -2   9  17 200.023 91.1451   3
  -9   3   0 108.556 40.8268   2
   3  -9   0 67.9504 56.1260   2
  -9  -3   0 24.8583 48.7782   4
  -3  -9   0 70.6590 40.2979   2
  -9   3   0 34.7492 36.7142   4
  -9  -3   0 79.4682 16.3757   2
  -3   9   0 5.04205 42.7672   3
  -9   3   0 86.0602 34.0859   3
   9   3   0 67.7085 35.9467   3
   9  -3   0 32.0953 31.8050   3
  -9   3  -2 427.052 56.3112   4
  -9   3   2 301.799 45.0852   4
  -9  -3  -2 303.884 64.0280   4
  -3   9   2 345.737 63.4064   2
   9  -3   2 337.508 54.4875   4
   3  -9   2 385.382 72.8880   2
  -3   9  -2 331.483 51.5361   3
  -9   3   2 389.504 55.8096   3
  -9   3   2 340.864 53.6801   2
  -3   9   2 317.292 59.3599   3
   9   3  -2 317.661 52.9221   3
  -9   3  -2 353.107 39.5630   3
   9   3   2 378.431 46.9022   3
   9  -3   2 323.893 39.6840   3
   9  -3  -2 421.312 53.8852   3
   9  -3   4 48.7658 44.6568   4
   3   9   4 27.5888 36.7586   2
  -3  -9  -4 33.8229 42.1390   4
   9  -3   4 71.3012 40.1880   2
  -9  -3  -4-0.15631 58.7542   4
  -9   3   4 37.1789 44.5127   3
   9  -3  -4 21.4318 40.3613   3
  -9   3  -4 34.1423 51.0556   4
  -9   3   4 189.764 39.1602   4
  -3   9   4 17.8553 48.2911   3
   9  -3   4 85.5660 24.1928   3
  -9  -3  -6 508.263 78.8835   4
  -3  -9  -6 669.113 66.6387   4
  -9   3   6 643.824 76.9494   3
   3   9   6 744.038 81.9212   3
   3   9   6 661.239 69.0179   2
   9   3  -6 684.114 55.2837   1
  -3   9   6 584.107 79.0551   3
  -3  -9  -8 23.9646 39.1387   4
  -9  -3  -8 32.3044 58.1184   4
  -9   3   8 54.4084 57.6094   3
   3   9   8 47.6556 56.9022   3
  -9   3   8 19.2610 28.5096   1
  -3   9   8-34.3370 60.6151   3
   9   3  -8 20.6023 33.6361   1
  -9   3  10 35.6864 36.3207   1
  -9  -3 -10-35.7259 65.8719   4
  -3  -9 -10-70.2125 48.5404   4
   9   3  10-21.6696 50.4527   1
   9   3 -10 6.44911 39.8535   1
  -3   9 -10 13.4001 27.5646   3
   9   3  10 4.11453 31.5989   3
   3   9  10-66.3773 62.0281   3
  -3   9  10 118.455 66.6767   3
  -9   3  10 92.0808 57.3297   3
  -9   3  12 263.916 79.3884   3
   9   3  12 356.018 77.4449   1
   3   9  12 395.605 81.6904   3
   9   3  12 307.203 40.8986   3
  -3   9  12 272.008 80.1370   3
  -3   9  14 90.8942 71.0632   3
  -9   3  14 214.070 77.1065   3
   3   9  14 283.318 81.3582   3
   9   3  14 100.685 64.0633   1
  -3   9  16-3.40292 77.1904   3
   9   3  16 26.7444 67.7012   1
  -3   9  16-80.1810 79.8248   1
  -9   3  16-3.47231 72.4407   3
   3   9  16 32.0897 72.0308   3
  -9   4   1 1767.92 91.9529   3
  -4  -9  -1 1889.73 93.3594   2
  -9   4  -1 1814.80 82.2787   3
   9  -4   1 1822.35 95.8966   4
  -9  -4  -1 1968.34 116.105   4
   4  -9   1 1916.84 118.642   2
  -4   9  -1 1995.35 101.548   3
  -4   9   1 1850.40 104.801   3
   9   4  -1 1946.09 101.075   3
   9  -4   1 1850.83 84.8522   3
   9  -4  -1 1753.98 91.9979   3
   9   4   1 1921.75 95.5672   3
  -4  -9   1 1878.11 94.7011   2
  -9   4   1 1911.09 105.651   2
  -9   4  -1 1843.83 96.5366   4
  -9   4   1 1858.47 87.6110   4
   4  -9  -3 175.714 15.9610   4
  -9   4   3 228.217 38.2532   4
   9  -4   3 186.669 52.1266   4
  -9  -4  -3 284.101 68.5523   4
  -9   4   3 138.937 47.4520   3
   9  -4   3 133.032 48.7953   2
  -4   9  -3 179.402 42.7002   3
  -9   4   3 164.418 51.3162   2
  -9   4  -3 160.373 28.4578   3
   9  -4   3 113.256 28.5696   3
  -4   9   3 148.167 54.8978   3
   9  -4  -3 253.472 54.9392   3
   4  -9   3 188.428 63.0392   2
  -9   4  -3 223.819 54.5277   4
  -9   4   5 1176.20 61.9063   4
  -4  -9  -5 1092.93 86.0458   4
  -4   9  -5 1222.52 72.6081   3
  -9   4   5 1532.44 50.7635   1
  -9   4   5 1275.57 97.5569   3
  -4   9   5 1256.07 104.655   3
   9  -4   5 1239.31 86.4363   2
   4   9   5 1122.46 78.2918   2
  -9  -4  -5 1240.00 103.356   4
  -4  -9  -7 1249.95 90.4550   4
  -9   4   7 1165.82 100.867   3
   4   9   7 1191.56 85.1653   2
  -9   4   7 1257.26 64.7816   4
   4   9   7 1325.38 108.999   3
  -9   4   7 1364.64 64.4970   1
  -4   9   7 1186.29 107.350   3
   9   4  -7 1227.86 78.2380   1
  -9  -4  -7 1320.64 111.562   4
  -4  -9  -9 140.328 52.7287   4
  -9   4   9 157.017 39.5631   1
   9   4  -9 189.798 48.7410   1
  -9   4   9 139.838 63.2714   3
   9   4   9 127.563 35.8263   3
   4   9   9 223.977 65.3112   3
  -4   9  -9 141.677 30.2583   3
  -4   9   9 185.231 70.3755   3
  -9  -4  -9 167.025 69.0541   4
  -4  -9 -11-2.49572 48.0474   4
  -9   4  11 26.5846 61.4769   3
  -9   4  11 38.2173 39.3937   1
   9   4  11 22.1181 29.5392   3
   4   9  11 19.2455 60.5493   3
   9   4  11 39.0137 54.1260   1
  -4   9  11 73.9750 71.6375   3
  -9  -4 -11 114.666 77.3977   4
  -9   4  13 1662.38 141.575   3
  -9   4  13 1811.82 115.554   1
   4   9  13 1851.28 142.107   3
  -4   9  13 1757.09 153.126   3
   9   4  13 1687.15 133.942   1
  -4   9  15 141.134 83.6961   3
  -4   9  15 196.119 80.2885   1
  -9   4  15 151.831 83.7271   3
   9   4  15 52.5669 66.1955   1
   4   9  15 102.522 69.0397   3
   9  -5   0 889.655 67.0679   4
  -9   5   0 926.453 39.2566   1
  -5   9   0 968.521 77.1258   3
   9  -5   0 991.808 72.1011   3
   5  -9   0 937.080 91.7442   2
  -9   5   0 1083.71 88.0346   2
  -5  -9   0 930.318 66.7392   2
  -9   5   0 948.221 67.4765   4
   5  -9   0 910.124 54.6504   4
  -9   5   0 857.449 64.6385   3
  -9   5   2 334.594 42.9047   4
   5  -9  -2 268.620 26.0986   4
   9  -5   2 454.434 56.8032   4
  -9   5   2 314.842 51.7580   3
  -9  -5  -2 265.969 63.5612   4
  -9   5  -2 245.004 36.9980   3
   5  -9   2 230.640 63.1989   2
  -9   5   2 356.181 63.9969   2
   9  -5   2 247.474 54.2175   2
   9  -5   2 332.047 43.1701   3
  -5   9  -2 267.637 46.0113   3
  -9   5  -2 244.747 50.6513   4
  -9   5  -2 251.692 31.5053   1
  -5   9   2 197.934 55.0920   3
   9  -5  -2 264.486 49.9314   3
   9  -5   4 1436.07 97.6579   4
  -9  -5  -4 1427.78 110.307   4
  -5  -9  -4 1483.55 101.626   4
  -9   5  -4 1485.54 57.8856   3
  -5   9  -4 1470.16 79.7419   3
  -5   9   4 1373.22 102.629   3
  -9   5   4 1423.59 47.3368   1
  -9   5  -4 1493.00 76.4290   1
   5  -9   4 1657.92 116.298   2
   9  -5   4 1347.32 92.3106   2
  -9   5   4 1309.01 98.0708   3
  -9   5   4 1595.67 67.6526   4
  -9  -5  -6 61.0049 64.3743   4
  -9   5   6 27.5444 23.8664   4
   9  -5   6 32.5520 47.3580   2
  -5  -9  -6 11.4115 51.1662   4
  -9   5   6 3.67458 54.0154   3
   5   9   6 68.4290 39.8915   2
  -9   5  -6 52.0358 35.7800   1
  -5   9  -6 4.71808 27.2503   3
  -9   5   6 32.9348 22.2539   1
  -5   9   6-33.0767 59.7430   3
  -9   5   8 195.700 37.4252   1
  -9  -5  -8 193.406 75.7186   4
  -5   9   8 156.076 65.7863   3
  -9   5   8 239.365 31.1142   4
   9   5  -8 218.983 53.7655   1
  -9   5   8-14.5530 75.1521   3
  -5   9  -8 142.615 30.8148   3
   5   9   8 146.268 61.1824   3
  -5  -9  -8 149.196 54.3276   4
   5   9   8 252.799 54.1766   2
  -9   5  10 11.0175 61.4734   3
  -5   9  10 14.0984 62.4319   3
  -5   9 -10 10.1541 21.5641   3
  -9   5  10 12.2474 34.4405   1
   9   5  10 37.2245 35.3545   3
  -9  -5 -10 39.6542 62.9768   4
   5   9  10-13.0224 58.3671   3
  -5  -9 -10 3.63230 52.8337   4
   9   5  12 918.804 107.607   1
  -9  -5 -12 931.038 120.119   4
  -5  -9 -12 970.761 100.224   4
  -9   5  12 1042.23 120.193   3
   9   5  12 943.843 77.0928   3
  -9   5  12 988.686 85.3261   1
   5   9  12 925.868 107.008   3
  -5   9  12 1207.84 127.478   3
  -5   9  14-89.4883 87.7936   3
  -5   9  14 22.9306 64.9453   1
  -9   5  14 114.105 80.9950   3
   9   5  14-22.1568 64.8725   1
  -9   5  14 9.01515 51.4924   1
   5   9  14-5.76932 68.2705   3
  -5   9  16 262.152 87.5008   1
   5   9  16 145.321 81.6922   3
   6  -9   1 8637.06 250.144   2
   9  -6   1 8679.02 205.408   4
  -6  -9  -1 8379.54 181.580   2
  -9  -6  -1 8926.47 250.365   4
   9  -6   1 8677.46 199.158   3
   9  -6  -1 8608.66 214.741   3
   6  -9  -1 8645.26 157.488   4
  -6   9  -1 8429.61 207.021   3
  -6   9   1 8819.28 225.714   3
  -9   6  -1 8442.47 190.948   3
  -9   6  -1 8509.30 156.607   1
  -6  -9   1 8813.59 194.488   2
  -9   6   1 8933.08 242.065   2
  -9   6   1 8687.59 213.251   3
   6  -9   1 8612.84 186.435   4
   6  -9   3 1100.82 97.8643   2
  -9   6  -3 1075.48 64.7364   1
   9  -6   3 1150.83 93.0941   2
  -9  -6  -3 1032.69 98.8890   4
   9  -6   3 1171.06 86.2903   4
  -6   9  -3 1082.85 72.9347   3
  -9   6  -3 1072.85 60.7119   3
  -6   9   3 1090.60 93.7714   3
   6  -9   3 1075.04 77.2923   4
  -6  -9  -3 1266.32 101.493   4
  -9   6   3 1027.65 85.9343   3
  -9   6   3 1101.79 58.0578   4
  -9  -6  -5 108.848 58.8515   4
   6  -9   5 229.028 61.8648   2
  -6  -9  -5 198.002 61.2604   4
   9  -6   5 190.472 55.8374   2
  -9   6   5 218.362 28.1014   4
  -9   6  -5 246.301 25.2984   3
  -9   6   5 211.048 56.6891   3
  -9   6  -5 287.474 48.7043   1
  -6   9  -5 259.145 39.6593   3
  -6   9   5 214.639 60.4900   3
  -6  -9  -7 9043.76 256.752   4
  -9   6   7 9957.99 132.339   4
  -6   9  -7 9581.52 177.712   3
   6   9   7 9295.71 213.255   2
  -6   9   7 9879.10 286.373   3
  -9   6   7 9502.47 187.133   1
  -9   6  -7 9747.28 242.752   1
   9   6   7 9705.91 131.872   2
  -9   6   7 9477.26 275.806   3
  -9  -6  -7 9853.73 288.900   4
  -9   6   9 1534.61 45.0443   4
   6   9   9 1478.35 97.4417   2
  -9   6   9 1396.63 119.313   3
  -6  -9  -9 1533.37 115.087   4
   9   6   9 1639.51 105.479   3
   6   9   9 1522.83 119.289   3
  -6   9  -9 1579.02 55.8939   3
  -6   9   9 1536.58 132.359   3
  -9  -6  -9 1474.31 125.668   4
  -9   6   9 1719.51 90.1940   1
  -6  -9 -11 212.399 73.0711   4
  -6   9  11 95.4393 69.3161   3
  -9  -6 -11 250.474 77.0583   4
  -9   6  11 159.385 46.4686   1
  -9   6  11 116.887 66.0164   3
   9   6  11 230.239 56.0202   3
   6   9  11 301.656 75.7222   3
  -6   9  13-40.0385 83.6807   3
  -6   9  13-45.9817 64.8284   1
  -9   6  13-35.2261 70.2466   3
   9   6  13 17.5037 57.7103   1
  -9   6  13 36.3376 44.6864   1
   6   9  13-5.09983 64.0920   3
   6   9  15 3306.44 189.139   3
  -6   9  15 3230.09 209.999   3
   9   6  15 3473.69 207.597   1
  -6   9  15 3437.00 197.897   1
  -6   9  17 187.788 84.8933   1
   9  -7   0 33107.5 438.600   4
   9  -7   0 33060.6 471.905   3
  -7   9   0 34406.7 483.876   3
  -9   7   0 33616.6 466.503   3
  -7  -9   0 34475.0 419.302   2
  -9  -7   0 33651.8 330.155   2
   7  -9   0 32586.3 409.155   4
   7  -9   2 2411.44 141.455   2
   9  -7   2 2198.51 109.534   4
   9  -7   2 2410.17 132.707   2
   7  -9  -2 2319.46 70.6075   4
  -9  -7  -2 2346.03 140.829   4
   7  -9   2 2230.84 103.316   4
   9  -7  -2 2119.65 117.513   3
  -7   9  -2 2411.91 107.022   3
  -7   9   2 2261.09 122.705   3
  -9   7  -2 2390.63 93.3264   1
  -9   7   2 2376.90 121.093   3
  -9   7  -2 2298.32 98.3975   3
   9  -7   4 1274.91 95.8383   4
  -9  -7  -4 1309.22 114.261   4
  -7  -9  -4 1230.18 105.294   4
  -9   7  -4 1157.07 77.1431   1
   7  -9   4 1085.46 100.891   2
   9  -7   4 1273.64 103.000   2
  -7   9  -4 1308.03 73.6400   3
  -7   9   4 1098.81 97.7028   3
  -9   7   4 1189.01 99.1522   3
   7  -9   4 1166.67 85.3426   4
  -9   7  -4 1232.63 63.2722   3
  -7  -9  -6 7655.55 243.561   4
  -9  -7  -6 7768.44 256.347   4
  -9   7  -6 7716.02 107.344   3
  -7   9  -6 7809.66 158.178   3
  -7   9   6 7190.58 241.194   3
   7  -9   6 8096.18 252.384   2
   9  -7   6 7955.13 240.408   2
  -9   7   6 7228.18 239.022   3
  -9   7  -6 7824.47 212.133   1
  -7  -9  -8 15671.0 361.679   4
   7   9   8 15858.6 357.310   3
  -7   9  -8 15553.4 195.778   3
  -9   7   8 15309.2 272.740   1
  -7   9   8 15333.9 378.171   3
  -9   7   8 15207.0 372.764   3
   9   7   8 15651.6 218.699   2
   7   9   8 15776.5 282.947   2
  -9  -7  -8 15461.7 380.245   4
  -9  -7 -10 143.421 70.3241   4
  -7  -9 -10 190.774 68.3865   4
  -9   7  10 218.438 82.1503   3
  -7   9  10 221.103 81.4616   3
   9   7  10 114.913 48.4382   3
   7   9  10 203.049 68.8912   3
  -9   7  10 179.192 45.4114   1
  -7   9  12 215.444 88.7293   3
  -7   9  12 192.446 62.2651   1
  -9   7  12 163.348 78.7596   3
   9   7  12 225.810 64.0295   3
   7   9  12 230.056 71.9804   3
  -7  -9 -12 168.490 72.8091   4
  -9  -7 -12 183.030 84.5639   4
  -9   7  12 250.829 59.2707   1
  -9   7  14 5011.14 254.392   3
   7   9  14 5354.86 231.140   3
   9   7  14 5262.36 246.930   1
  -7   9  14 4983.64 221.878   1
  -7   9  14 5313.71 262.821   3
  -7   9  16 3662.29 208.799   1
   8  -9   1 16169.0 283.890   4
   9  -8   1 16876.3 298.164   4
   8  -9  -1 16565.3 252.099   4
   9  -8  -1 16407.4 265.384   4
   8  -9   1 16794.0 370.639   2
   9  -8  -1 16775.4 331.829   3
  -8   9  -1 16471.5 304.101   3
  -8   9   1 16404.4 326.204   3
  -9  -8   1 16675.1 238.771   2
  -9   8   1 16631.7 323.817   3
  -9   8  -1 16633.7 300.055   3
  -8  -9   1 17077.5 266.227   2
  -9   8  -3 79.1816 31.9451   3
   9  -8   3 36.9528 37.7668   4
  -8   9  -3 20.6233 30.3306   3
  -9  -8  -3 96.0580 65.9199   4
  -8  -9  -3 13.5158 59.8012   4
  -9   8   3 15.8914 50.9963   3
   8  -9   3 35.8616 54.5302   2
   9  -8   3 30.4858 57.2024   2
   8  -9   3-4.06273 37.1707   4
  -9   8  -3 6.27782 34.1678   1
  -8   9   3 12.7574 53.1150   3
  -9   8   5 711.320 90.5356   3
  -9  -8  -5 679.954 95.1896   4
  -8  -9  -5 561.174 87.4029   4
  -9   8  -5 653.667 46.2553   3
   8  -9   5 534.623 83.3755   2
   9  -8   5 523.437 79.1692   2
  -9   8  -5 586.621 65.6149   1
  -8   9  -5 647.923 51.3946   3
  -8   9   5 579.040 83.4575   3
  -8  -9  -7 16328.5 381.872   4
   8  -9   7 16780.0 381.842   2
  -8   9  -7 16672.1 214.593   3
  -8   9   7 16599.4 390.219   3
   9  -8   7 16853.5 376.037   2
  -9  -8  -7 16403.9 391.077   4
  -9   8   7 16323.5 386.000   3
   9   8   9 5020.31 197.919   3
   8   9   9 5035.97 206.543   3
  -9  -8  -9 4986.48 220.230   4
  -8   9   9 5352.04 232.442   3
  -9   8   9 5114.19 225.471   3
  -8  -9  -9 5212.52 220.976   4
  -8  -9 -11-38.4531 67.9329   4
  -9   8  11 95.9337 75.2117   3
  -9   8  11-27.7845 43.6797   1
  -9  -8 -11 1.62004 70.9776   4
   9   8  11 47.6690 56.5516   3
   8   9  11 141.237 68.3149   3
  -8   9  11 111.333 76.9633   3
  -9   8  13 912.920 123.281   3
  -9  -8 -13 841.587 118.752   4
  -8   9  13 907.052 98.5319   1
   8   9  13 623.335 94.0359   3
   9   8  13 582.671 84.1830   3
  -9   8  13 789.396 89.8198   1
  -8  -9 -13 1006.65 121.039   4
  -8   9  13 1069.46 129.516   3
  -9  -9   0 9694.86 171.615   2
   9  -9   0 9578.70 206.369   4
  -9   9   0 10007.5 242.288   3
   9  -9   2 866.948 75.0186   4
  -9  -9  -2 1094.47 110.605   4
   9  -9   2 823.109 94.0467   2
  -9   9  -2 992.892 74.2847   3
  -9   9   2 935.292 88.9284   3
  -9   9   4 30.4090 56.1298   3
  -9  -9  -4-37.8804 65.4471   4
  -9   9  -4 70.4388 30.3988   3
  -9   9  -4 26.0795 39.6360   1
  -9  -9  -6 1862.17 141.049   4
  -9   9   6 1974.61 135.788   3
   9  -9   6 1915.01 136.239   2
  -9   9  -6 1995.19 72.1166   3
  -9  -9  -8 4788.32 215.055   4
   9  -9   8 5219.94 218.963   2
  -9   9   8 5124.08 225.936   3
  -9  -9 -10 178.521 74.2435   4
  -9   9  10 276.392 87.9847   3
   9   9  10 229.081 70.3859   3
  -9   9  12 161.935 82.2969   3
  -9   9  12 11.4856 45.9431   1
   9   9  12 35.2330 60.0329   3
  -9  -9 -12 53.4302 78.1868   4
   0 -10   0 2034.71 119.292   2
 -10   0   0 1915.86 108.900   4
 -10   0   0 1988.39 79.7432   2
  10   0   0 1954.11 38.8985   1
  10   0   0 2642.55 105.574   3
  10   0   2 1398.37 73.1101   3
 -10   0  -2 1165.28 89.8984   4
 -10   0   2 1206.42 84.5555   3
 -10   0   2 1274.77 88.4718   4
   0 -10   2 1378.87 99.4838   2
  10   0  -2 1343.27 85.8632   3
  10   0   2 1259.10 52.1313   1
  10   0   4 28425.4 349.099   3
   0  10   4 28648.3 474.613   3
 -10   0   4 28364.1 443.479   3
 -10   0  -4 28460.5 466.866   4
  10   0   4 28428.0 359.239   1
   0 -10  -4 28113.6 359.068   4
   0  10   4 29444.1 468.285   2
 -10   0  -6-32.8007 55.5519   4
   0 -10  -6-2.03096 27.4697   4
  10   0   6-13.5867 30.7755   2
  10   0   6 26.9199 21.6984   3
   0  10   6 99.9576 61.5734   3
 -10   0   6 19.0463 47.1890   3
  10   0   6 5.29353 35.9437   1
  10   0   8 2466.95 119.411   1
  10   0   8 2621.36 62.7494   3
 -10   0   8 2415.93 140.573   3
   0  10   8 2503.42 149.267   3
   0 -10  -8 2427.69 87.4991   4
 -10   0  -8 2356.33 148.303   4
  10   0   8 2501.03 56.2364   3
  10   0  10 4799.46 182.882   1
 -10   0  10 5193.45 213.847   3
   0  10  10 4763.90 212.394   3
 -10   0  12 7239.11 265.488   3
  10   0  12 6991.41 244.467   1
   0  10  12 7024.87 269.843   3
   0  10  14 377.658 96.5936   3
  10   0  14 297.252 78.8684   1
 -10   0  14 475.991 91.6832   3
  10   0  16 69.7912 65.2094   1
   0  10  16 116.439 80.5602   3
  10  -1  -1 311.194 46.6148   3
  -1  10   1 271.744 57.2308   3
  10  -1   1 304.951 43.6589   3
 -10   1  -1 237.243 52.8160   4
 -10  -1  -1 289.728 59.2784   4
 -10   1   1 275.867 55.8323   4
 -10  -1   1 316.505 61.8992   4
  -1 -10   1 312.500 59.9217   2
   1 -10   1 315.840 63.4113   2
  10   1  -1 312.179 49.4599   3
 -10   1   1 263.111 42.9678   2
  10   1   1 357.411 48.0409   3
 -10  -1   1 272.098 35.0902   2
  -1 -10  -1 380.228 65.1909   2
   1 -10  -1 277.249 62.4943   2
 -10   1   1 266.146 48.4686   3
  10   1  -3 2595.59 121.752   3
 -10  -1  -3 2547.42 131.761   4
  10   1  -3 2582.87 55.9692   1
 -10   1   3 2579.94 113.604   4
  10   1   3 2644.80 97.9522   3
  10  -1   3 2597.83 134.480   4
 -10   1  -3 2734.56 132.640   4
  -1  10   3 2553.76 131.636   3
 -10   1   3 2590.49 123.711   3
  10  -1   3 2596.72 81.6747   1
   1  10   3 2599.30 125.297   2
   1 -10   3 2597.46 134.055   2
  -1  10   3 2584.93 132.973   2
  10  -1  -3 2616.62 122.022   3
  10  -1   3 2487.56 87.8175   3
  10   1   5 1683.39 62.9461   2
   1 -10  -5 1548.70 61.7231   4
  -1 -10  -5 1631.04 80.9310   4
  10   1   5 1573.31 70.8729   3
  10  -1   5 1685.56 80.6316   2
 -10   1   5 1500.67 104.050   3
   1  10   5 1592.54 114.598   3
  -1  10   5 1439.91 108.799   3
  10  -1   5 1676.19 80.7120   1
 -10  -1   5 1646.08 107.423   3
  10   1  -5 1615.54 57.8987   1
  10   1   5 1598.94 82.2205   1
  10  -1   5 1706.02 62.4200   3
   1  10   5 1747.97 109.557   2
 -10   1  -5 1494.31 109.227   4
 -10  -1  -5 1634.03 115.319   4
  10   1   7 585.417 42.6477   3
 -10  -1  -7 677.279 87.6773   4
   1  10   7 500.401 78.4921   3
  10  -1   7 565.965 63.8129   1
  10   1   7 638.835 67.4187   1
 -10   1   7 557.065 77.5696   3
  10  -1   7 513.368 23.8821   3
  -1  10   7 534.446 81.4689   3
 -10  -1   7 587.332 78.8042   3
   1 -10  -7 633.734 38.0840   4
  -1 -10  -7 643.206 56.3231   4
 -10   1  -7 547.572 81.3745   4
  10  -1   9-36.3020 48.2361   1
  10   1   9 2.28762 22.6951   3
  10   1   9 6.30741 19.7210   3
 -10   1   9 14.5746 53.8755   3
   1  10   9-13.1405 62.3011   3
 -10  -1   9 37.0516 55.8187   3
  -1  10  -9 10.1609 35.6962   3
  -1  10   9-34.3016 64.1685   3
  10   1   9 51.5427 46.2138   1
  -1 -10  -9 75.3306 36.5301   4
 -10  -1  -9-49.5578 69.4969   4
  10   1  11 2610.03 146.852   1
 -10   1  11 2586.31 160.745   3
 -10  -1  11 2766.94 164.800   3
   1  10  11 2650.30 163.780   3
  -1  10  11 2674.59 168.331   3
  10  -1  11 2615.87 144.779   1
  10  -1  13 10.9471 59.6752   1
  10   1  13 3.86293 62.0348   1
 -10   1  13-12.8624 67.4930   3
 -10  -1  13 20.9523 68.5054   3
   1  10  13 45.4114 80.8910   3
  -1  10  13 11.9033 76.6131   3
  10  -1  15 302.944 75.8307   1
 -10   1  15 365.268 90.2333   3
 -10  -1  15 318.654 94.1103   3
   1  10  15 264.657 87.5187   3
  10   1  15 334.688 82.0811   1
  -1  10  15 373.753 99.4545   3
   1  10  17 186.127 83.3537   3
   2 -10   0 2171.93 127.525   2
 -10  -2   0 2157.02 119.484   4
  10   2   0 2302.67 104.360   3
  -2  10   0 2533.14 122.320   3
 -10   2   0 2334.86 101.467   3
 -10   2   0 2288.63 109.832   4
  10  -2   0 2299.03 111.163   3
 -10   2   0 2266.47 100.218   2
 -10  -2   0 2307.09 65.8068   2
  -2 -10   0 2298.78 115.943   2
 -10   2   2 1963.20 98.7300   2
 -10  -2  -2 1618.69 109.992   4
 -10   2   2 1722.12 92.8223   4
  10   2  -2 1878.50 101.803   3
  10  -2   2 1926.01 112.944   4
 -10   2   2 1773.27 98.9632   3
  10   2   2 1753.03 86.9685   3
  -2  10   2 1976.89 114.448   3
  10  -2   2 1682.57 77.1710   3
  -2 -10   2 1763.24 105.418   2
  10  -2  -2 1785.10 98.6406   3
   2 -10   2 1808.73 115.649   2
 -10   2  -2 1759.89 105.597   4
 -10  -2  -4 6626.68 214.324   4
  10  -2   4 5990.68 159.875   2
 -10   2   4 6087.04 164.755   4
   2 -10  -4 5838.76 110.501   4
  -2 -10  -4 5960.58 165.576   4
 -10   2   4 5716.37 186.798   3
  -2  10   4 6112.99 207.320   3
  10   2   4 6142.49 153.176   3
  10   2  -4 6001.61 119.719   1
  10  -2   4 5713.26 123.503   3
   2  10   4 6018.87 186.484   2
 -10   2  -4 6114.03 198.292   4
 -10  -2  -6 270.093 66.9013   4
  -2 -10  -6 378.079 50.4726   4
  10  -2   6 364.459 50.3430   2
  10  -2   6 361.154 49.9875   1
   2  10   6 389.201 63.9184   2
  10  -2   6 361.405 23.9485   3
   2  10   6 261.797 69.2520   3
 -10   2   6 380.117 67.5651   3
  -2  10   6 325.935 70.5443   3
  10   2   6 377.411 42.2100   3
  10   2  -6 283.727 36.3228   1
  10   2   6 416.034 32.6867   2
 -10   2  -6 263.756 65.0481   4
 -10  -2  -8 1074.89 108.241   4
 -10   2   8 1135.78 103.812   3
  -2  10   8 1242.47 115.739   3
   2  10   8 1177.78 106.872   3
 -10  -2   8 1241.17 107.309   3
  10   2  -8 1112.34 70.0834   1
  10   2   8 1138.06 88.7298   1
  -2 -10  -8 1151.39 78.3871   4
  10  -2   8 1151.26 86.5986   1
  -2  10 -10 1115.58 79.3421   3
  10   2  10 1105.93 60.6825   3
  10  -2  10 1080.61 95.8478   1
 -10   2  10 1042.46 108.759   3
   2  10  10 1119.42 115.753   3
 -10  -2  10 1029.58 108.498   3
  -2  10  10 1014.56 110.181   3
  -2 -10 -10 1287.25 84.6780   4
  10   2  10 1037.44 94.1203   1
 -10  -2 -10 1225.91 122.931   4
  10  -2  12 3400.47 175.035   1
 -10   2  12 3466.98 191.587   3
   2  10  12 3423.82 189.518   3
 -10  -2  12 3749.54 193.234   3
  -2  10  12 3356.81 191.777   3
  10   2  12 3312.54 171.209   1
  10   2  14 32.8659 64.2587   1
 -10   2  14 46.2155 70.7160   3
 -10  -2  14 116.703 69.5120   3
   2  10  14-81.6336 83.8517   3
  -2  10  14 53.3742 78.6710   3
  -2  10  16 506.383 101.386   3
  -2  10  16 490.619 100.575   1
  10   2  16 529.227 93.3274   1
   2  10  16 579.391 109.872   3
 -10   3   1 5228.29 156.832   4
  -3 -10  -1 5213.85 167.881   2
 -10  -3  -1 5349.32 189.320   4
 -10   3   1 5202.58 158.362   3
  10   3  -1 5448.50 168.660   3
 -10  -3   1 5496.64 186.109   4
  -3  10  -1 5328.26 171.224   3
  -3  10   1 5393.71 179.450   3
 -10   3  -1 5541.61 146.998   3
  10   3   1 5346.63 158.704   3
  10  -3   1 5226.80 144.940   3
  10  -3  -1 5385.46 161.185   3
  -3 -10   1 5327.28 170.558   2
 -10   3   1 5156.83 163.896   2
 -10   3  -1 5295.30 165.667   4
   3 -10   1 5314.27 193.671   2
 -10  -3  -3 38662.6 576.939   4
 -10   3   3 39204.9 482.080   4
 -10   3   3 39348.1 537.431   2
  10  -3   3 39261.9 557.862   4
  10  -3   3 39159.8 504.902   2
 -10   3   3 38573.7 531.937   3
  -3  10   3 39276.3 568.926   3
  10   3   3 39364.6 489.459   3
  10  -3   3 37743.3 435.577   3
  10  -3  -3 40062.4 542.558   3
   3 -10   3 38596.8 576.776   2
 -10   3  -3 39193.4 546.338   4
  -3 -10  -5 22552.8 367.461   4
 -10   3   5 22727.6 407.472   3
 -10   3   5 23188.9 335.606   4
 -10  -3  -5 22812.0 431.309   4
  10  -3   5 23099.2 362.608   2
  10  -3   5 22811.8 256.717   3
  -3  10   5 22426.3 422.798   3
   3  10   5 22512.4 384.684   2
  10   3  -5 23273.8 311.161   1
 -10   3  -5 22407.5 414.118   4
  -3 -10  -7 10483.1 239.840   4
 -10   3   7 10595.4 283.805   3
  10   3  -7 10496.3 210.683   1
   3  10   7 10257.9 288.910   3
   3  10   7 11034.5 266.145   2
  -3  10   7 10405.8 295.066   3
 -10  -3  -7 10644.2 298.848   4
 -10  -3  -9 50.8881 64.5368   4
  -3 -10  -9 72.0501 41.6008   4
  10   3   9 120.951 56.9185   1
  10   3   9 40.5382 33.3872   3
  10   3  -9 29.9149 37.1367   1
 -10   3   9 80.6501 63.7833   3
   3  10   9 119.946 65.3889   3
  -3  10  -9 75.7922 36.2901   3
  -3  10   9 62.2842 60.0668   3
 -10   3  11 21142.4 462.434   3
   3  10  11 21518.6 460.191   3
  10   3  11 21252.5 313.426   3
  -3  10  11 21893.3 481.022   3
  10   3  11 20388.3 422.880   1
  -3 -10 -11 21152.0 381.888   4
 -10  -3 -11 21359.3 485.060   4
 -10   3  13 3958.52 209.075   3
   3  10  13 3727.07 201.512   3
  -3  10  13 3926.76 216.520   3
  10   3  13 3764.85 194.053   1
  10   3  15 4027.60 213.002   1
 -10   3  15 3810.60 221.449   3
   3  10  15 3570.79 205.636   3
  -3  10  15 3744.06 221.030   3
   3  10  17 356.747 99.9670   3
   4 -10   0 23139.6 433.872   2
 -10   4   0 24366.6 362.038   3
  -4  10   0 24146.6 399.721   3
  10   4   0 24100.5 384.864   3
  10  -4   0 23548.5 360.886   3
 -10   4   0 23697.7 388.542   2
 -10  -4   0 24256.2 425.905   4
 -10   4   0 24158.5 369.076   4
  -4 -10   0 24058.6 379.856   2
 -10   4   2 8927.08 221.491   3
 -10  -4  -2 8659.67 249.906   4
  10  -4   2 9074.64 231.403   4
 -10   4  -2 8961.26 182.185   3
  -4  10  -2 8792.13 218.144   3
  -4  10   2 9148.54 243.564   3
  10  -4   2 8834.22 183.943   3
  10   4   2 8488.70 206.153   3
  10  -4  -2 8859.45 223.558   3
 -10   4  -2 8735.24 221.264   4
   4 -10   2 8738.13 256.398   2
 -10   4   2 8716.81 232.268   2
 -10   4   2 8967.98 196.879   4
  10  -4   4 67384.8 773.762   2
 -10  -4  -4 67517.6 851.102   4
 -10   4   4 68599.7 817.254   2
  -4 -10  -4 66893.7 783.764   4
  -4  10  -4 69794.9 747.875   3
  10  -4   4 66821.0 645.339   3
 -10   4   4 69527.1 701.151   4
  -4  10   4 68955.1 841.186   3
   4 -10   4 67750.4 847.183   2
 -10   4  -4 67255.6 806.497   4
 -10   4   4 68245.8 807.650   3
 -10   4   6 856.849 59.9515   4
 -10  -4  -6 828.498 98.6438   4
  -4 -10  -6 665.481 72.4172   4
  10  -4   6 795.054 75.1251   2
   4  10   6 761.657 73.1151   2
 -10   4   6 712.647 86.5186   3
   4  10   6 720.576 87.8315   3
  -4  10   6 832.539 93.3898   3
  10   4  -6 822.726 64.2490   1
   4  10   8 11552.7 275.803   2
 -10   4   8 11530.5 310.534   3
 -10   4   8 12328.9 219.246   4
  10   4  -8 11454.4 245.709   1
   4  10   8 12085.8 317.242   3
  -4  10   8 12331.6 330.176   3
 -10  -4  -8 11177.6 318.368   4
  -4 -10  -8 11818.3 275.692   4
 -10   4  10 11719.9 235.238   1
 -10   4  10 11464.0 326.821   3
   4  10  10 11307.3 321.997   3
  10   4  10 11438.9 300.128   1
  -4  10  10 11196.9 330.054   3
 -10  -4 -10 10753.0 330.979   4
  -4 -10 -10 11068.2 275.053   4
 -10   4  12 23334.2 507.226   3
   4  10  12 23298.1 495.210   3
  -4  10  12 23768.4 521.649   3
  10   4  12 23396.2 481.480   1
 -10  -4 -12 22637.5 518.064   4
  -4  10  14 409.475 100.605   3
 -10   4  14 447.294 98.0800   3
  10   4  14 416.935 85.2588   1
   4  10  14 345.996 89.3529   3
   4  10  16 1567.86 150.905   3
  -4  10  16 1676.94 154.754   1
 -10   5   1 875.230 67.2620   4
  -5 -10  -1 1004.94 73.9773   2
  10  -5   1 999.636 79.4026   4
 -10  -5  -1 907.216 95.7153   4
 -10   5   1 886.373 83.5691   2
 -10   5   1 807.196 70.1862   3
  -5  10  -1 906.320 78.0991   3
  10  -5   1 946.022 68.9303   3
   5 -10   1 927.704 96.9535   2
   5 -10  -1 948.530 52.8293   4
  10  -5  -1 914.591 75.4831   3
  10   5   1 937.145 76.5408   3
  -5  10   1 855.936 82.1452   3
  -5 -10   1 933.106 72.7776   2
 -10   5  -1 929.997 65.9884   3
 -10   5  -1 890.135 74.9495   4
 -10   5   3 19923.2 364.094   3
  10  -5   3 20122.3 368.310   4
  10  -5   3 19968.7 363.389   2
 -10   5  -3 20347.2 281.039   3
 -10  -5  -3 19354.9 395.931   4
  10  -5   3 19507.6 285.985   3
  -5  10  -3 20050.7 335.049   3
  -5  10   3 20095.6 384.177   3
   5 -10   3 20040.6 402.244   2
 -10   5   3 20516.5 295.414   4
 -10   5   5 12461.3 207.780   4
 -10   5   5 12307.3 298.348   3
 -10  -5  -5 11918.9 314.303   4
  -5 -10  -5 12264.1 288.286   4
  -5  10  -5 12416.3 242.702   3
 -10   5   5 12360.1 154.038   1
  -5  10   5 12202.1 309.233   3
   5 -10   5 12208.8 313.304   2
  10  -5   5 11936.6 277.289   2
  -5 -10  -7 3037.06 146.892   4
 -10   5   7 3415.20 98.6021   4
   5  10   7 3086.91 159.110   3
  -5  10  -7 3323.30 115.395   3
 -10   5   7 2724.38 151.218   3
 -10   5   7 3331.30 95.4463   1
   5  10   7 3302.54 135.846   2
  -5  10   7 3344.16 171.315   3
  10  -5   7 3276.07 147.792   2
  10   5  -7 3370.03 132.744   1
 -10  -5  -7 3126.71 170.317   4
 -10   5   9 18.5715 29.5643   1
 -10  -5  -9 33.6758 64.4786   4
  -5 -10  -9 15.6282 51.5449   4
 -10   5   9-22.5224 59.6074   3
  10   5   9 0.09046 37.7343   3
  -5  10  -9 93.4186 32.0699   3
   5  10   9-23.4032 48.9838   2
   5  10   9-34.4491 57.0781   3
  -5  10   9 82.8862 71.7352   3
 -10   5   9 18.9890 27.4912   4
 -10  -5 -11 13172.4 380.913   4
 -10   5  11 13127.5 368.368   3
  10   5  11 12744.1 282.714   3
   5  10  11 13061.6 354.240   3
  -5  10  11 13247.5 376.422   3
 -10   5  11 13462.1 275.654   1
  -5 -10 -11 12885.1 322.269   4
 -10   5  13 1559.13 144.024   3
   5  10  13 1414.00 133.463   3
  10   5  13 1495.85 130.682   1
  -5  10  13 1645.81 151.000   3
  -5  10  15 939.527 120.053   1
  10   5  15 1057.20 126.126   1
   5  10  15 1082.00 127.596   3
   6 -10   0 37.6427 28.8669   4
 -10   6   0 25.8651 17.1967   1
  10  -6   0 2.79127 38.0697   4
 -10   6   0-1.69260 39.2351   3
  -6 -10   0 43.2514 35.7955   2
  10  -6   0 13.8229 41.9750   3
  -6  10   0 32.8754 41.2906   3
 -10   6   0 83.6816 39.6894   4
   6 -10  -2 182.594 24.7085   4
  10  -6   2 272.265 52.1521   4
 -10   6   2 186.002 53.7538   3
 -10  -6  -2 177.963 67.7371   4
 -10   6  -2 251.686 43.6536   3
   6 -10   2 85.9148 60.4592   2
  10  -6   2 164.125 40.7806   3
  10  -6  -2 106.257 46.9441   3
  -6  10  -2 109.128 37.7493   3
 -10   6  -2 154.413 29.8447   1
  -6  10   2 133.396 54.2123   3
 -10   6   2 144.260 34.6103   4
   6 -10   2 223.894 46.5584   4
 -10   6   4 45.1610 28.8317   4
 -10  -6  -4 64.8057 62.4302   4
 -10   6   4 66.2921 51.4210   3
  -6 -10  -4 76.5016 54.7414   4
   6 -10   4 154.876 67.9001   2
 -10   6  -4 73.2580 33.5574   1
  10  -6   4 93.5591 52.5693   2
 -10   6  -4 8.46538 25.0319   3
  -6  10  -4-6.50272 35.6281   3
  -6  10   4 132.611 59.0580   3
   6 -10   4 31.5241 42.1047   4
 -10  -6  -6 828.351 98.9171   4
   6 -10   6 545.862 84.6912   2
 -10   6  -6 713.002 67.4334   1
  -6 -10  -6 606.345 80.5934   4
 -10   6   6 576.564 84.3506   3
  10  -6   6 607.906 77.2464   2
  -6  10  -6 680.376 56.6692   3
  -6  10   6 654.273 87.6169   3
 -10   6   6 619.159 41.8270   1
 -10   6   6 704.769 43.5051   4
 -10  -6  -8 95.3706 71.4770   4
 -10   6   8 46.1237 20.9301   4
  -6 -10  -8 14.6736 56.9879   4
  10  -6   8 28.9912 51.7992   2
 -10   6   8-34.0499 67.0438   3
   6  10   8 28.8359 43.2587   2
   6  10   8 44.6222 58.9182   3
  -6  10  -8 45.3460 36.5016   3
  -6  10   8 84.0438 66.5743   3
 -10   6   8 63.5852 29.8922   1
 -10  -6 -10-26.1342 72.2273   4
  -6 -10 -10 81.9318 59.9012   4
 -10   6  10 37.4622 64.3851   3
  10   6  10 41.5117 44.6420   3
 -10   6  10 11.3421 37.5145   1
   6  10  10-28.7313 65.7909   3
  -6  10  10 77.2316 73.3935   3
  -6  10  12 77.0742 79.2617   3
 -10   6  12 7.13185 74.8835   3
  10   6  12 94.3507 46.0670   3
   6  10  12 153.079 74.8332   3
 -10   6  12 111.828 43.8593   1
  -6 -10 -12 152.761 66.0944   4
 -10  -6 -12 92.3098 81.3014   4
  -6  10  14-114.579 97.7967   3
  -6  10  14-112.836 82.0013   1
  10   6  14-50.3076 61.4833   1
 -10   6  14 17.5355 76.5755   3
   6  10  14-22.6422 74.3563   3
  -6  10  16-30.7432 74.4492   1
   7 -10  -1 1019.84 56.8676   4
  10  -7   1 1068.42 80.5440   4
 -10  -7  -1 1203.43 111.803   4
   7 -10   1 1203.03 74.4658   4
  10  -7   1 940.534 77.0395   3
  10  -7  -1 1008.06 84.8326   3
 -10   7  -1 1040.05 58.0191   1
  -7  10  -1 1017.16 81.6768   3
   7 -10   1 1113.75 107.836   2
  -7  10   1 1025.45 89.1537   3
  -7 -10   1 1104.78 77.3804   2
 -10   7   1 1149.29 88.6536   3
 -10   7  -1 1219.13 79.7452   3
  10  -7   3 8048.08 227.225   4
  10  -7   3 7899.83 240.647   2
 -10  -7  -3 7884.85 258.442   4
  -7 -10  -3 8303.04 253.415   4
 -10   7  -3 7914.99 180.078   1
   7 -10   3 7721.02 210.033   4
  -7  10  -3 8190.43 201.039   3
  -7  10   3 8075.02 242.259   3
 -10   7  -3 8180.19 178.943   3
 -10   7   3 8279.32 235.741   3
   7 -10   3 8108.72 260.676   2
 -10  -7  -5 3171.34 172.814   4
  -7 -10  -5 2974.32 156.728   4
 -10   7  -5 3120.22 85.3533   3
  -7  10  -5 2914.95 109.873   3
  -7  10   5 2815.31 153.691   3
   7 -10   5 3128.89 166.059   2
 -10   7  -5 3049.43 124.364   1
 -10   7   5 3109.45 158.839   3
  10  -7   5 2960.43 153.793   2
 -10  -7  -7 958.372 107.955   4
  -7 -10  -7 938.426 100.481   4
   7 -10   7 1157.04 112.858   2
 -10   7   7 1118.76 109.214   3
  10  -7   7 1008.29 97.9022   2
  -7  10   7 953.785 105.528   3
  -7  10  -7 1091.90 62.4444   3
 -10   7   7 1024.18 62.0617   1
   7  10   7 894.201 68.3943   2
 -10  -7  -9 28.2983 64.5284   4
  -7 -10  -9-57.6324 64.7553   4
 -10   7   9 4.13724 63.9694   3
  10   7   9-10.5645 48.6752   3
   7  10   9-0.21327 63.0508   3
 -10   7   9 9.80220 32.7049   1
  -7  10   9 20.6833 66.5433   3
 -10   7  11 4141.33 217.126   3
 -10   7  11 4275.11 156.361   1
  10   7  11 3930.61 176.152   3
   7  10  11 4331.66 207.318   3
  -7  10  11 4446.15 227.043   3
 -10  -7 -11 4186.56 218.886   4
  -7 -10 -11 4040.24 195.593   4
  -7  10  13 746.186 120.245   3
  -7  10  13 395.846 81.3288   1
 -10   7  13 630.570 117.624   3
   7  10  13 494.796 89.8511   3
  -7 -10 -13 468.785 89.3963   4
 -10  -7 -13 573.573 108.787   4
  -7  10  15 382.106 89.5515   1
  10  -8   0 1555.95 89.1630   4
  10  -8   0 1303.81 93.2884   3
  -8 -10   0 1563.03 79.8566   2
   8 -10   0 1566.98 80.4129   4
  -8  10   0 1449.92 98.1566   3
 -10   8   0 1483.27 95.9184   3
  10  -8   2 1350.23 93.0491   4
   8 -10   2 1410.84 120.324   2
   8 -10  -2 1453.98 60.9536   4
 -10  -8  -2 1435.70 122.558   4
  -8  10  -2 1278.04 85.1076   3
 -10   8  -2 1271.57 74.8712   1
  -8  10   2 1473.70 107.201   3
 -10   8   2 1210.46 97.5750   3
 -10   8  -2 1384.92 83.3011   3
   8 -10   2 1381.63 87.8472   4
 -10  -8  -4 10402.5 306.991   4
  -8 -10  -4 9579.04 285.257   4
 -10   8  -4 9587.67 223.427   1
  10  -8   4 9564.83 281.723   2
  -8  10  -4 10217.2 215.682   3
  -8  10   4 10094.6 284.123   3
 -10   8   4 10119.3 280.102   3
   8 -10   4 10318.1 303.760   2
 -10   8  -4 10227.1 197.555   3
  -8  10  -6-4.16170 25.2925   3
 -10   8   6 6.34713 57.0278   3
 -10  -8  -6-44.2828 68.9825   4
  -8 -10  -6-38.1027 71.6192   4
   8 -10   6-30.1817 62.2678   2
  10  -8   6-46.7884 61.3952   2
 -10   8  -6 19.5001 18.7306   3
  -8  10   6-74.3738 65.5923   3
  -8  10   8 523.344 95.7465   3
 -10  -8  -8 668.258 105.516   4
  -8 -10  -8 474.348 83.7443   4
 -10   8   8 521.114 53.9344   1
 -10   8   8 573.347 94.2304   3
   8 -10   8 591.323 90.9626   2
  10  -8   8 476.572 82.0413   2
 -10   8  10 2364.61 169.531   3
  10   8  10 2490.45 148.316   3
   8  10  10 2295.51 153.474   3
  -8  10  10 2618.17 178.822   3
 -10   8  10 2452.83 116.801   1
 -10  -8 -10 2419.56 170.909   4
  -8 -10 -10 2198.86 153.282   4
  10   8  12 2957.86 161.817   3
   8  10  12 3030.09 179.137   3
  -8  10  12 2975.29 200.211   3
  -8  10  12 3021.39 163.687   1
 -10  -8 -12 3081.92 197.797   4
  -8 -10 -12 2840.82 179.867   4
 -10   8  12 3003.09 195.812   3
   8  10  14 40.2966 76.3861   3
 -10   9   1 140.090 46.5381   3
 -10   9  -1 112.100 40.7662   3
   9 -10   1 168.802 45.8398   4
  10  -9   1 142.162 45.3844   4
   9 -10  -1 191.478 35.2723   4
 -10  -9   1 183.722 31.4899   2
  -9 -10   1 149.212 36.2670   2
  -9  10  -1 203.850 49.4551   3
  -9  10   1 187.510 55.4301   3
 -10   9   3 29.3919 51.4404   3
 -10   9  -3-6.20057 32.9342   3
   9 -10   3-38.4892 49.7804   4
 -10  -9  -3-3.01029 65.0137   4
  -9 -10  -3-7.69929 67.9958   4
 -10   9  -3 6.53078 36.4933   1
   9 -10   3-18.1497 63.4052   2
  10  -9   3 50.9152 62.6309   2
  -9  10  -3-11.5904 39.6487   3
  -9  10   3 7.47496 54.6707   3
  -9  10   5 66.8371 61.8107   3
 -10   9   5 202.248 72.3331   3
 -10   9  -5 34.0045 28.4256   3
 -10  -9  -5 67.5061 73.9433   4
  -9 -10  -5 4.55978 65.2574   4
 -10   9  -5 36.6646 43.6008   1
   9 -10   5 130.447 72.9725   2
  10  -9   5 26.8393 61.2960   2
  -9  10  -5 28.1513 28.2645   3
  -9  10   7 288.366 77.6591   3
 -10   9   7 371.748 84.2181   3
 -10  -9  -7 295.781 85.3382   4
  -9 -10  -7 274.555 74.3183   4
   9 -10   7 216.344 70.1065   2
  10  -9   7 385.958 82.6337   2
  -9  10   9 116.130 73.6897   3
 -10  -9  -9-40.6636 80.6362   4
 -10   9   9 88.2015 39.1291   1
 -10   9   9 138.915 81.4668   3
   9 -10   9 60.8832 61.9760   2
  10  -9   9 22.5587 69.6820   2
  10   9   9 98.6365 60.5248   3
   9  10   9 71.8051 62.0426   3
  -9 -10  -9 127.132 71.9610   4
 -10  -9 -11 53.3397 68.2161   4
  -9 -10 -11 79.1719 75.2986   4
  -9  10  11 11.6312 82.0456   3
 -10   9  11-94.3813 82.4544   3
  10   9  11 73.6425 66.5607   3
   9  10  11 34.8484 65.6365   3
   9  10  13-37.7877 76.6549   3
  -9 -10 -13 8.34133 73.6976   4
 -10  -9 -13-27.2365 85.7150   4
  10 -10   0 5331.96 159.305   4
 -10  10   0 5502.84 188.644   3
  10 -10   2 1211.38 90.7566   4
 -10 -10  -2 1335.28 125.878   4
 -10 -10   2 1434.43 79.1099   2
 -10  10   2 1158.25 100.341   3
 -10  10  -2 1316.78 88.5177   3
  10 -10   4 10769.1 323.503   2
 -10 -10  -4 11141.6 335.156   4
 -10  10   4 10741.6 302.958   3
 -10  10  -4 10635.5 224.035   3
 -10  10   6 90.7110 67.7500   3
 -10 -10  -6-8.11678 76.9702   4
  10 -10   6 22.5438 67.0655   2
 -10 -10  -8 3452.21 199.992   4
  10 -10   8 3227.91 187.255   2
 -10  10   8 3076.16 185.445   3
  10  10  10 1613.57 136.076   3
 -10  10  10 1624.60 150.978   3
  10 -10  10 1692.48 144.007   2
 -10 -10 -10 1607.48 146.037   4
  10  10  12 5549.32 241.248   3
 -10 -10 -12 5128.99 254.922   4
 -10 -10 -14 99.0500 83.9734   4
  11   0  -1 17569.7 317.621   3
 -11   0   1 17155.8 331.236   4
   0 -11  -1 17133.5 352.640   2
  11   0   1 17570.8 194.447   1
 -11   0  -1 16938.0 339.504   4
   0 -11   1 17162.0 355.318   2
 -11   0   1 16733.7 274.153   2
  11   0   1 17419.4 295.637   3
  11   0   3 38862.8 471.017   3
 -11   0   3 40116.5 546.882   4
   0  11   3 40261.3 595.282   3
 -11   0   3 39136.8 549.652   3
   0 -11   3 40724.2 592.535   2
  11   0   3 40332.3 432.407   1
 -11   0  -3 39545.7 582.720   4
  11   0   5 11622.4 198.575   3
   0 -11  -5 11784.5 210.359   4
  11   0   5 12227.3 204.893   2
  11   0   5 11781.3 223.741   1
   0  11   5 11896.1 309.123   3
 -11   0   5 11630.0 287.638   3
 -11   0  -5 11511.5 300.149   4
  11   0   7 21776.6 359.861   1
   0  11   7 22193.5 449.904   3
 -11   0   7 21765.1 426.532   3
   0 -11  -7 22057.0 301.147   4
  11   0   7 22104.1 316.893   2
 -11   0  -7 21459.0 443.076   4
  11   0   7 21941.9 260.252   3
  11   0   9 1021.49 89.7489   1
 -11   0   9 903.226 100.630   3
   0  11   9 1166.57 115.965   3
 -11   0  -9 1050.51 113.885   4
 -11   0  11 21981.3 479.109   3
  11   0  11 20582.5 420.309   1
   0  11  11 22210.6 486.795   3
  11   0  13 128.211 69.4987   1
 -11   0  13 55.9675 67.7911   3
   0  11  13 195.764 84.2643   3
   0  11  15 8194.97 317.955   3
  11   0  15 7877.43 296.688   1
  -1 -11   0 21641.0 398.528   2
 -11   1   0 21680.1 378.477   4
  11   1   0 22402.9 358.871   3
   1 -11   0 22287.4 415.693   2
 -11  -1   0 21927.0 392.104   4
 -11   1   0 21239.7 320.775   2
 -11  -1   0 21601.4 279.785   2
  11  -1   0 21981.4 349.769   3
  11  -1  -2 669.868 68.6371   3
 -11   1  -2 520.254 69.6754   4
  11  -1   2 619.627 54.7141   3
 -11  -1  -2 632.674 78.8242   4
 -11   1   2 626.685 69.7340   4
 -11  -1   2 731.192 78.0765   4
  -1 -11   2 591.163 75.7046   2
   1 -11   2 548.612 74.2790   2
  11   1   2 606.483 57.1215   3
  -1  11   2 626.583 78.5925   3
 -11   1   2 688.135 63.3353   2
  11   1   2 620.598 42.9145   1
 -11   1   2 624.366 69.8202   3
  11   1   4 9863.40 197.866   3
 -11   1   4 10046.9 235.202   4
   1 -11  -4 9576.08 178.837   4
  -1 -11  -4 9736.59 208.797   4
   1  11   4 9891.01 273.496   3
  -1  11   4 9763.98 272.079   3
 -11   1   4 9627.05 250.209   3
  11  -1   4 9496.66 181.664   1
   1  11   4 9883.72 261.312   2
  11   1   4 9815.17 193.719   1
  11  -1   4 9670.62 182.278   3
 -11   1  -4 9472.10 261.886   4
 -11  -1  -4 9916.72 272.868   4
  11   1   6 1761.46 69.2305   2
  -1 -11  -6 1679.66 84.3114   4
  11   1   6 1715.11 74.7289   3
   1  11   6 1721.25 127.463   3
 -11   1   6 1745.44 119.207   3
  -1  11   6 1678.75 125.061   3
 -11  -1  -6 1606.89 123.857   4
 -11  -1   6 1658.83 115.969   3
  11  -1   6 1685.17 89.7599   1
  11   1   6 1807.84 94.5339   1
  11  -1   6 1743.92 60.5737   3
 -11   1  -6 1574.15 121.571   4
  11  -1   6 1742.94 85.7719   2
   1 -11  -6 1723.36 64.7316   4
  11   1   8 8278.46 222.831   1
  11   1   8 8693.42 150.845   3
 -11   1   8 8162.20 263.984   3
   1  11   8 7623.93 264.157   3
  -1  11   8 8039.46 267.691   3
 -11  -1   8 8563.90 267.350   3
  11  -1   8 8170.22 217.715   1
 -11   1  -8 8027.57 273.600   4
 -11  -1  -8 8117.80 274.598   4
  -1 -11  -8 8312.04 186.140   4
 -11  -1 -10 1797.86 147.692   4
  11   1  10 1649.43 113.656   1
 -11   1  10 1708.79 135.595   3
   1  11  10 1856.68 144.654   3
 -11  -1  10 1490.64 126.898   3
  -1  11  10 1601.82 137.165   3
  11  -1  10 1650.03 114.609   1
  11   1  12 2149.66 142.093   1
 -11   1  12 2246.66 160.959   3
 -11  -1  12 2401.90 166.394   3
   1  11  12 2051.98 157.700   3
  -1  11  12 2286.83 165.543   3
  11  -1  12 2033.97 137.961   1
  11  -1  14 1647.13 139.785   1
 -11   1  14 1634.21 148.469   3
  11   1  14 1791.25 144.928   1
 -11  -1  14 1818.69 156.009   3
   1  11  14 1700.17 152.972   3
  -1  11  14 1783.70 157.502   3
   1  11  16 1548.34 154.721   3
  11  -2  -1 213.405 46.9262   3
 -11   2  -1 189.479 52.7950   4
 -11   2   1 152.940 47.0627   4
 -11  -2  -1 165.292 55.9210   4
 -11  -2   1 206.035 60.5554   4
 -11   2   1 161.037 45.5838   2
  -2 -11   1 170.116 52.9143   2
   2 -11   1 148.309 59.6931   2
  11   2  -1 213.200 45.5956   3
  -2  11   1 129.427 50.2422   3
 -11  -2   1 205.406 30.7149   2
  11   2   1 170.099 43.1407   3
  -2 -11  -1 228.920 56.1174   2
 -11   2   1 253.187 51.9343   3
 -11   2  -1 170.628 38.7089   3
  11  -2   1 180.180 40.6706   3
 -11  -2  -3 12351.9 307.648   4
 -11   2   3 12543.7 260.104   4
 -11   2   3 12430.3 269.538   2
  11   2   3 12410.6 243.649   3
 -11   2   3 12581.7 282.508   3
  -2  11   3 13049.2 309.189   3
  11  -2   3 12024.3 216.333   3
   2 -11   3 13037.1 316.139   2
 -11   2  -3 12506.9 291.347   4
  11  -2   5 7309.70 183.620   2
   2 -11  -5 7338.45 118.454   4
  11   2  -5 6760.48 132.579   1
  -2 -11  -5 7084.76 186.423   4
 -11   2   5 7293.35 225.052   3
   2  11   5 7205.48 235.119   3
  11   2   5 7114.74 170.504   3
  -2  11   5 7378.31 240.331   3
  11  -2   5 6899.04 132.768   3
 -11   2   5 7208.49 190.962   4
   2  11   5 6966.61 216.250   2
 -11   2  -5 6838.96 228.184   4
 -11  -2  -5 6959.44 235.839   4
 -11  -2  -7 381.299 82.6021   4
  -2 -11  -7 460.932 55.7904   4
  11  -2   7 441.756 58.2575   2
  11   2  -7 411.240 44.2884   1
  11   2   7 450.992 36.5660   2
  11   2   7 410.591 62.1426   1
   2  11   7 376.307 79.0198   3
 -11   2  -7 389.296 79.2781   4
 -11   2   7 355.264 74.0639   3
  11   2   7 422.919 46.6885   3
  11  -2   7 444.217 60.8533   1
  -2  11   7 352.709 81.2709   3
 -11  -2  -9-5.83372 73.5783   4
  -2 -11  -9 8.44453 36.1194   4
  11   2   9 49.8916 32.1284   3
  11   2   9-36.1788 49.1525   1
 -11   2   9 150.001 69.2409   3
   2  11   9-8.11336 63.1375   3
  -2  11  -9 21.0357 37.5584   3
  -2  11   9 116.499 70.3222   3
  11  -2   9 63.7399 48.9485   1
  11   2  11 6286.41 228.626   1
  11  -2  11 6240.38 221.384   1
 -11   2  11 6224.08 251.450   3
   2  11  11 6248.50 253.268   3
  -2  11  11 6857.75 270.904   3
 -11  -2 -11 6486.69 268.858   4
  11   2  13 1702.65 136.879   1
 -11   2  13 1836.15 153.327   3
   2  11  13 1663.06 144.695   3
  -2  11  13 1803.26 156.880   3
  11   2  15 136.759 71.4905   1
   2  11  15 143.476 89.5733   3
  -2  11  15 134.494 84.9255   3
  -3 -11   0 36079.7 524.129   2
 -11  -3   0 35709.5 551.643   4
  11   3   0 36173.5 503.132   3
  -3  11   0 35491.8 529.573   3
 -11   3   0 36083.9 479.904   3
   3 -11   0 35146.8 568.409   2
  11  -3   0 36152.1 479.591   3
 -11   3   0 35738.5 501.749   4
 -11   3   2 8213.18 203.586   4
 -11  -3  -2 8121.80 248.284   4
  11  -3   2 8117.88 232.687   4
 -11   3   2 8073.03 215.871   3
  -3  11  -2 8477.83 223.636   3
  11   3   2 7938.54 201.237   3
  -3  11   2 8068.28 239.389   3
 -11   3  -2 8368.46 182.406   3
  11  -3   2 7938.37 180.674   3
  11  -3  -2 8028.83 216.303   3
  -3 -11   2 8219.40 228.434   2
 -11   3  -2 8144.05 224.701   4
   3 -11   2 7976.37 249.451   2
 -11   3   2 7709.41 215.133   2
 -11  -3  -4 100894. 1141.61   4
 -11   3   4 103461. 1009.84   4
  11  -3   4 101617. 1022.17   2
   3 -11  -4 102180. 841.753   4
 -11   3   4 100402. 1087.71   3
  -3 -11  -4 98891.0 1038.61   4
  -3  11   4 99804.1 1127.15   3
  11   3   4 100956. 998.756   3
  11  -3   4 99539.7 914.588   3
   3 -11   4 101864. 1145.59   2
 -11   3  -4 100410. 1101.48   4
 -11  -3  -6 186.725 71.1650   4
  -3 -11  -6-5.06193 44.5137   4
 -11   3   6-60.7497 44.8162   4
   3  11   6-2.94221 48.5256   2
  11  -3   6-4.53444 46.3389   2
  11   3  -6 31.9723 30.1471   1
  11  -3   6 10.1577 13.5511   3
   3  11   6-72.8820 58.6819   3
 -11   3   6 16.0372 59.2793   3
  -3  11   6-9.78451 59.8284   3
  11   3   6 33.0749 36.0594   3
 -11   3  -6 3.41666 56.5320   4
 -11   3   8 18634.4 408.092   3
   3  11   8 18732.3 415.904   3
  -3  11   8 19362.4 425.901   3
  11   3   8 18236.2 355.256   1
  11  -3   8 18933.4 346.849   2
  11   3  -8 18237.9 301.562   1
 -11  -3  -8 18064.1 424.427   4
  -3 -11  -8 18646.4 340.247   4
 -11   3  10 18073.8 426.365   3
 -11  -3 -10 17252.7 437.607   4
  11   3  10 18103.5 294.997   3
   3  11  10 18226.6 427.376   3
  -3  11  10 18272.1 439.826   3
  11   3  10 18145.4 384.045   1
  -3 -11 -10 17954.5 342.164   4
 -11   3  12 33548.3 635.596   3
   3  11  12 32287.8 619.025   3
  -3  11  12 34235.6 648.591   3
  11   3  12 32717.2 577.381   1
  11   3  14 1990.88 154.279   1
 -11   3  14 2049.35 167.733   3
   3  11  14 1987.90 160.205   3
  -3  11  14 2144.81 175.960   3
   3  11  16 1716.92 158.669   3
   4 -11   1 11649.1 309.929   2
 -11  -4  -1 11298.5 294.687   4
  -4 -11  -1 11707.1 262.822   2
 -11   4   1 11721.9 257.199   3
 -11  -4   1 11578.4 294.099   4
 -11   4  -1 11722.2 235.966   3
  -4  11  -1 11380.9 270.630   3
  -4  11   1 11949.2 284.772   3
  11   4   1 11743.8 260.431   3
  11  -4   1 11609.4 238.561   3
  11  -4  -1 12033.6 262.479   3
 -11   4   1 11451.7 270.054   2
  -4 -11   1 11897.1 269.327   2
 -11   4  -1 11828.5 262.352   4
 -11   4   1 11998.4 250.560   4
 -11   4   3 100057. 965.476   4
 -11   4   3 96349.8 1059.11   2
 -11  -4  -3 96466.8 1108.65   4
 -11   4   3 96103.9 1040.49   3
  -4  11  -3 97658.5 1012.41   3
  -4  11   3 97642.3 1087.52   3
  11  -4   3 95014.7 915.734   3
  11   4   3 97041.4 992.720   3
 -11   4  -3 97976.3 911.325   3
   4 -11  -3 97158.3 820.767   4
   4 -11   3 96377.2 1114.35   2
 -11   4  -3 95057.2 1045.47   4
 -11  -4  -5 42989.0 660.568   4
 -11   4   5 45434.1 524.325   4
 -11   4   5 42750.0 626.503   3
  -4 -11  -5 42021.4 588.109   4
  -4  11  -5 44076.9 557.328   3
  11  -4   5 43504.7 437.424   3
  -4  11   5 43313.7 652.606   3
   4 -11   5 43413.3 661.623   2
 -11   4  -5 43205.1 631.618   4
  11  -4   5 43319.3 583.694   2
  -4 -11  -7 18756.4 362.412   4
 -11   4   7 19768.2 417.661   3
 -11   4   7 20815.1 310.222   4
   4  11   7 20117.3 425.596   3
  11   4  -7 19316.3 315.607   1
  -4  11   7 19192.0 426.790   3
  11  -4   7 19978.3 368.175   2
   4  11   7 19101.4 368.374   2
 -11  -4  -7 19634.7 434.217   4
 -11  -4  -9 209.069 81.9394   4
  -4 -11  -9 166.543 52.4395   4
 -11   4   9 177.495 44.3530   4
  11   4   9 76.5569 34.3427   3
 -11   4   9 141.937 68.4534   3
   4  11   9 120.396 70.7219   3
  -4  11   9 80.4429 65.4588   3
 -11   4  11 55856.2 842.436   3
   4  11  11 55485.9 828.769   3
  -4  11  11 55850.1 863.753   3
  11   4  11 54668.8 779.937   1
  -4 -11 -11 55333.5 728.408   4
 -11  -4 -11 54709.2 868.909   4
 -11   4  13 6715.07 282.943   3
   4  11  13 6655.24 273.159   3
  -4  11  13 6473.57 284.480   3
  11   4  13 6758.67 263.065   1
   4  11  15 8804.91 323.784   3
  11   4  15 8877.23 323.424   1
  -5 -11   0 8046.15 211.394   2
 -11   5   0 7609.74 198.483   3
   5 -11   0 7595.74 252.566   2
 -11  -5   0 7979.14 248.677   4
  -5  11   0 7828.96 224.650   3
  11  -5   0 7641.27 201.593   3
 -11   5   0 7741.32 202.995   4
   5 -11   0 7506.76 170.468   4
 -11   5   2 5533.65 183.145   3
 -11  -5  -2 5775.95 216.523   4
  11  -5   2 5408.28 186.367   4
 -11   5  -2 5479.80 150.774   3
  -5  11  -2 5061.17 172.782   3
 -11   5  -2 5566.14 183.781   4
  11  -5   2 5211.71 151.157   3
  -5  11   2 5527.41 199.029   3
  -5 -11   2 5705.14 183.165   2
   5 -11  -2 5374.72 112.136   4
 -11   5   2 5538.57 157.396   4
   5 -11   2 5624.97 217.895   2
 -11   5   4 47364.3 659.467   3
 -11  -5  -4 48531.6 718.395   4
  11  -5   4 47678.7 640.296   2
  -5 -11  -4 47817.9 657.818   4
  11  -5   4 47220.1 513.788   3
  -5  11  -4 48646.8 604.157   3
  -5  11   4 48025.3 690.289   3
 -11   5  -4 48327.9 503.707   3
   5 -11   4 48090.4 710.369   2
 -11   5   4 49867.6 551.256   4
 -11  -5  -6 194.333 70.0196   4
 -11   5   6 155.529 35.2820   4
   5  11   6 244.919 52.9600   2
   5 -11   6 302.092 76.1104   2
  -5 -11  -6 154.640 52.4489   4
  11  -5   6 164.381 54.7718   2
 -11   5   6 246.296 67.0561   3
  -5  11  -6 244.857 48.2105   3
  -5  11   6 153.486 67.3166   3
 -11   5   8 3362.62 179.463   3
 -11   5   8 3752.27 111.105   4
  -5  11  -8 3508.20 124.213   3
   5  11   8 3486.26 180.121   3
  11   5  -8 3226.91 135.358   1
  -5  11   8 3446.76 183.575   3
  11  -5   8 3384.67 156.438   2
   5  11   8 3189.21 146.421   2
 -11  -5  -8 3534.34 191.302   4
  -5 -11  -8 3471.92 160.401   4
 -11   5  10 9044.93 306.025   3
  11   5  10 9056.94 235.707   3
   5  11  10 9096.28 298.914   3
  -5  11  10 8850.74 309.066   3
 -11  -5 -10 8903.59 313.677   4
  -5 -11 -10 8791.50 259.263   4
 -11   5  12 16202.7 435.354   3
 -11  -5 -12 16754.0 454.454   4
   5  11  12 16330.1 420.444   3
  11   5  12 16167.1 404.753   1
  -5  11  12 16802.0 451.231   3
  -5 -11 -12 15987.7 369.267   4
  -5  11  14 221.957 90.9266   3
  11   5  14 261.063 78.8461   1
   5  11  14 263.434 91.5070   3
   5  11  16 183.897 94.6663   3
 -11   6   1 2344.39 117.925   3
 -11   6  -1 2371.67 109.082   3
   6 -11   1 2052.71 139.388   2
 -11  -6  -1 2323.48 144.116   4
  11  -6   1 2389.73 121.316   4
   6 -11   1 2422.65 103.684   4
  11  -6   1 2313.78 111.784   3
  11  -6  -1 2273.73 120.564   3
  -6  11  -1 2240.90 119.290   3
  -6  11   1 2442.64 132.059   3
 -11   6   1 2270.38 105.437   4
  -6 -11   1 2313.78 114.061   2
   6 -11  -1 2275.81 83.1492   4
 -11   6   3 148.251 37.4207   4
 -11  -6  -3 39.3595 65.7818   4
 -11   6   3 48.8263 54.8482   3
  11  -6   3 16.3459 36.1128   3
   6 -11   3 59.7562 39.8276   4
 -11   6  -3 18.6352 29.9632   3
  11  -6   3 62.7843 52.4771   2
  -6  11  -3-94.2752 52.6947   3
  -6  11   3 40.3741 55.0148   3
 -11   6   5 15.0102 11.1870   1
 -11   6   5 34.5161 29.0313   4
 -11  -6  -5-106.311 78.1507   4
  -6 -11  -5 113.684 61.4316   4
   6 -11   5 34.7506 63.7298   2
 -11   6   5 63.0691 57.2168   3
  11  -6   5 18.4516 59.0832   2
  -6  11  -5-0.35142 34.7431   3
  -6  11   5-32.4481 61.4482   3
 -11   6   7 2471.19 154.637   3
  -6 -11  -7 2872.97 153.872   4
  11   6  -7 2747.53 128.865   1
  -6  11  -7 2857.70 110.358   3
 -11   6   7 2826.12 82.5030   1
  -6  11   7 2936.85 168.943   3
   6 -11   7 2796.43 166.916   2
   6  11   7 2714.51 123.984   2
  11  -6   7 2837.92 150.564   2
 -11   6   7 3055.81 88.6004   4
 -11  -6  -7 2716.83 169.416   4
 -11  -6  -9 1094.73 120.642   4
 -11   6   9 1106.36 118.431   3
   6  11   9 979.610 107.683   3
  -6  11   9 1438.88 131.536   3
  11  -6   9 1240.18 107.560   2
  -6 -11  -9 1230.68 109.438   4
 -11  -6 -11 438.923 99.5824   4
  -6 -11 -11 294.020 77.4406   4
 -11   6  11 340.428 90.3335   3
  11   6  11 142.428 51.0290   3
   6  11  11 195.421 78.9467   3
  -6  11  11 301.708 92.5836   3
  -6  11  13 398.443 99.7609   3
  11   6  13 492.208 90.2992   1
 -11   6  13 429.186 95.0684   3
   6  11  13 584.041 102.048   3
 -11  -6 -13 546.346 115.213   4
  -6  11  15 870.015 121.660   1
   6  11  15 908.515 124.065   3
 -11   7   0 26808.7 420.600   3
  -7 -11   0 26964.8 398.755   2
  11  -7   0 26039.5 426.987   3
 -11   7   0 26183.9 297.369   1
  -7  11   0 26688.4 444.922   3
   7 -11   0 26337.0 361.867   4
   7 -11   2 616.714 64.2386   4
 -11   7  -2 678.888 62.9750   3
   7 -11  -2 694.270 41.6649   4
  -7 -11   2 575.661 64.8742   2
  11  -7   2 627.197 73.3643   4
 -11  -7  -2 575.788 93.5129   4
 -11   7   2 683.707 81.5852   3
  11  -7   2 567.137 63.1526   3
   7 -11   2 727.937 99.5473   2
 -11   7   2 576.008 30.0543   1
  -7  11  -2 703.922 71.4013   3
  -7  11   2 714.979 87.0406   3
 -11   7  -2 596.574 47.4002   1
 -11  -7  -4 21327.5 461.372   4
  -7 -11  -4 20953.1 428.480   4
 -11   7  -4 21945.8 303.315   3
  -7  11  -4 22050.3 358.890   3
  -7  11   4 21938.9 438.377   3
 -11   7  -4 21068.5 330.504   1
  11  -7   4 21876.0 426.694   2
   7 -11   4 21566.4 460.416   2
 -11   7   4 21180.7 419.742   3
 -11  -7  -6 1409.89 129.528   4
  -7 -11  -6 1498.08 120.834   4
  -7  11  -6 1616.04 86.5918   3
 -11   7  -6 1482.22 94.6133   1
  -7  11   6 1494.63 125.902   3
   7 -11   6 1568.32 131.018   2
 -11   7   6 1583.94 61.0459   1
  11  -7   6 1535.95 120.468   2
 -11   7   6 1527.68 123.237   3
 -11   7   8 13923.4 370.900   3
  -7 -11  -8 13184.4 344.822   4
   7  11   8 13343.6 360.659   3
  -7  11   8 13697.0 374.802   3
   7 -11   8 14246.1 377.926   2
  11  -7   8 14002.6 348.489   2
 -11  -7  -8 14303.6 388.810   4
 -11   7  10 3983.31 211.991   3
  11   7  10 3849.30 174.252   3
   7  11  10 3461.20 189.829   3
  11  -7  10 4068.29 195.509   2
  -7  11  10 4081.38 218.212   3
 -11  -7 -10 3790.81 214.237   4
  -7 -11 -10 3658.43 187.552   4
 -11   7  12 5785.48 268.253   3
  -7 -11 -12 5734.05 239.363   4
   7  11  12 5430.62 244.888   3
  -7  11  12 6101.04 276.767   3
 -11  -7 -12 5794.42 270.063   4
   7  11  14 2619.14 179.900   3
  -7  11  14 2464.64 169.353   1
 -11   8   1 6439.57 133.262   1
   8 -11  -1 6745.76 152.429   4
  11  -8   1 6774.83 197.500   4
 -11  -8  -1 6608.34 246.851   4
  11  -8   1 6919.01 199.427   3
 -11   8  -1 6827.11 151.421   1
  -8  11  -1 6847.25 207.151   3
  -8  11   1 6650.46 216.866   3
 -11  -8   1 6930.66 115.813   2
  -8 -11   1 7171.25 187.969   2
 -11   8   1 7062.80 213.031   3
 -11   8  -1 7059.07 196.742   3
   8 -11   1 6677.50 180.309   4
 -11   8  -3 14320.8 262.152   3
   8 -11   3 13568.0 363.080   2
 -11   8  -3 13344.0 249.309   1
 -11  -8  -3 14236.7 369.326   4
  11  -8   3 14022.3 346.240   2
  -8 -11  -3 13790.3 353.089   4
  -8  11  -3 14301.5 285.642   3
  -8  11   3 13344.2 331.939   3
 -11   8   3 13741.5 326.535   3
   8 -11   3 13441.5 292.336   4
 -11  -8  -5 5948.46 243.917   4
  -8 -11  -5 5991.78 233.772   4
 -11   8  -5 6226.40 135.796   3
  11  -8   5 6323.27 235.620   2
  -8  11  -5 6264.03 169.000   3
  -8  11   5 6021.60 230.927   3
 -11   8  -5 5733.28 177.730   1
   8 -11   5 6221.35 245.622   2
 -11   8   5 6001.73 227.602   3
 -11  -8  -7 11292.1 344.747   4
  -8 -11  -7 11170.0 326.816   4
  -8  11   7 11913.3 342.789   3
   8 -11   7 11855.0 344.167   2
  11  -8   7 11183.9 316.153   2
 -11   8   7 11216.3 328.612   3
  -8  11   9 358.196 94.1734   3
 -11  -8  -9 497.356 96.2314   4
  -8 -11  -9 535.493 93.2146   4
   8 -11   9 323.665 83.1748   2
  11  -8   9 336.174 80.3523   2
 -11   8   9 375.060 95.6460   3
   8  11   9 291.179 78.7615   3
 -11   8  11 10325.7 349.054   3
  -8 -11 -11 9157.25 308.995   4
  11   8  11 10165.6 294.626   3
   8  11  11 9582.89 318.166   3
  11  -8  11 9687.80 314.646   2
  -8  11  11 10107.5 352.571   3
 -11  -8 -11 9671.27 345.379   4
   8  11  13-44.0608 82.0870   3
  -8 -11 -13-18.6683 76.2287   4
 -11  -8 -13-38.5395 88.8636   4
 -11   9   0 377.345 61.6693   3
   9 -11   0 477.100 54.6023   4
  11  -9   0 485.244 62.6789   4
  -9  11   0 557.303 72.9830   3
   9 -11   2-3.34048 39.6670   4
 -11   9   2 80.3903 54.3455   3
 -11  -9   2 9.14106 24.7684   2
 -11   9  -2 45.0749 39.6693   3
 -11  -9  -2-11.2764 65.3195   4
  -9 -11   2 53.8492 36.8692   2
  -9 -11  -2 162.194 70.4545   4
   9 -11   2 8.14166 67.6193   2
  -9  11  -2 71.8367 41.8843   3
  -9  11   2-14.4034 58.0211   3
 -11   9   4 131.979 65.3387   3
 -11  -9  -4 63.7652 76.5988   4
  -9 -11  -4 200.858 80.1172   4
 -11   9  -4 83.5595 35.8362   3
   9 -11   4 111.595 75.1563   2
  11  -9   4 79.8598 63.0671   2
  -9  11  -4 166.642 45.8539   3
  -9  11   4 134.162 69.6122   3
 -11   9   6 365.697 78.1612   3
 -11  -9  -6 350.982 86.7555   4
  -9 -11  -6 454.545 88.0234   4
   9 -11   6 418.554 88.8919   2
  11  -9   6 486.290 91.0719   2
  -9  11   6 442.378 89.3591   3
 -11  -9  -8 62.2338 76.4428   4
  -9 -11  -8 84.1306 74.3936   4
  -9  11   8 109.410 75.5433   3
 -11   9   8 81.7647 71.5104   3
   9 -11   8 61.4836 70.8598   2
  11  -9   8 3.19920 65.0393   2
 -11  -9 -10 12.7881 76.5892   4
  -9 -11 -10 5.51554 68.8058   4
  -9  11  10 23.2625 75.3066   3
   9 -11  10-55.1370 76.7107   2
  11  -9  10 29.0107 67.9474   2
 -11   9  10 60.8162 77.4131   3
  11   9  10-32.7621 60.0727   3
   9  11  10-63.5237 76.3464   3
 -11  -9 -12 221.093 90.6892   4
  -9 -11 -12 262.975 89.9072   4
  11  -9  12 338.003 90.5143   2
   9  11  12 199.641 76.7930   3
  -9 -11 -14 188.418 92.2424   4
 -10 -11   1 3028.37 110.438   2
 -11 -10  -1 3148.49 185.257   4
 -10  11  -1 3116.65 142.976   3
 -10  11   1 3249.05 156.415   3
 -11  10   1 3211.81 154.603   3
 -11  10  -1 3026.26 139.629   3
  10 -11   3 22243.0 486.863   2
 -11 -10  -3 21660.0 489.775   4
 -10 -11  -3 21911.5 482.836   4
 -10  11  -3 21834.2 368.890   3
 -10  11   3 22527.4 450.632   3
 -11  10   3 21371.6 439.396   3
 -11  10  -3 21789.7 358.749   3
  10 -11   5 11317.3 347.238   2
  11 -10   5 11132.4 337.891   2
 -11 -10  -5 11695.6 357.988   4
 -10 -11  -5 11325.5 350.353   4
 -10  11   5 11325.3 327.668   3
 -10  11  -5 11468.3 229.673   3
 -11  10   5 11550.0 333.528   3
 -11 -10  -7 4409.49 228.818   4
 -10 -11  -7 5059.53 240.659   4
 -10  11   7 4952.81 233.019   3
 -11  10   7 4967.42 231.493   3
  10 -11   7 4452.37 222.112   2
  11 -10   7 4752.52 225.640   2
 -11 -10  -9 216.572 84.4958   4
 -10 -11  -9 6.19021 74.5669   4
 -10  11   9 250.674 89.8047   3
 -11  10   9 121.110 80.4251   3
  10 -11   9 82.7103 78.0368   2
  11 -10   9 174.578 85.0332   2
  10  11   9 100.238 68.3393   3
  11  10  11 12858.7 364.884   3
  10  11  11 12498.7 373.245   3
  10 -11  11 13704.1 408.037   2
  11 -10  11 13287.2 396.583   2
 -11 -10 -11 12765.0 407.157   4
 -10 -11 -11 12852.6 398.338   4
 -10 -11 -13 2243.96 179.248   4
 -11 -10 -13 2027.54 181.086   4
 -11  11   0 17042.5 359.547   3
 -11 -11  -2 3755.27 205.648   4
 -11  11   2 4058.56 184.272   3
 -11  11  -2 3892.26 157.067   3
 -11 -11  -4 57271.5 877.001   4
  11 -11   4 56804.1 861.024   2
 -11  11   4 57036.9 819.133   3
 -11  11  -4 56642.8 662.681   3
 -11  11   6 145.371 83.0068   3
 -11 -11  -6-110.973 92.9662   4
  11 -11   6 47.2298 70.4829   2
 -11 -11  -8 10873.2 366.508   4
 -11  11   8 11194.5 362.796   3
  11 -11   8 11255.3 361.029   2
  11  11  10 10897.1 348.586   3
  11 -11  10 11054.7 371.184   2
 -11  11  10 11688.5 384.860   3
 -11 -11 -10 10708.7 370.302   4
 -11 -11 -12 20418.4 529.838   4
 -12   0   0 6947.40 217.231   4
   0 -12   0 6982.77 228.991   2
  12   0   0 6907.37 192.953   3
 -12   0  -2 21.8144 52.8564   4
  12   0   2 60.3337 37.7753   3
 -12   0   2 48.8136 49.8332   4
   0 -12   2 147.412 60.4972   2
   0  12   2 92.9417 59.2738   3
 -12   0   2 88.8545 37.9906   2
  12   0   2 45.8819 21.7726   1
 -12   0   4 16836.8 336.724   4
  12   0   4 16689.9 257.145   1
   0  12   4 16566.5 374.969   3
 -12   0   4 16714.4 348.462   3
   0 -12   4 16237.7 365.872   2
 -12   0  -4 15822.9 361.539   4
  12   0   4 16085.8 266.308   3
   0 -12  -6 1444.31 75.5161   4
  12   0   6 1667.35 77.1211   2
  12   0   6 1469.22 86.2215   1
   0  12   6 1645.99 130.458   3
 -12   0   6 1639.13 118.258   3
 -12   0  -6 1507.83 124.799   4
  12   0   6 1500.28 67.9258   3
  12   0   8 7597.09 212.626   1
   0  12   8 7278.49 265.804   3
 -12   0   8 7514.82 257.750   3
  12   0   8 7233.27 173.921   2
 -12   0  -8 7512.64 274.204   4
   0 -12  -8 7444.45 156.470   4
 -12   0  10 2746.43 168.994   3
  12   0  10 2616.99 140.434   1
   0  12  10 2688.91 176.848   3
 -12   0 -10 2720.86 180.529   4
 -12   0  12 4345.77 220.060   3
   0  12  12 4006.54 218.196   3
  12   0  12 3977.32 188.894   1
   0  12  14 3213.60 208.982   3
  12   0  14 3286.17 193.142   1
 -12   1  -1 5289.47 189.826   4
  12   1   1 5521.58 170.257   3
 -12   1   1 5758.14 191.434   4
 -12  -1  -1 5537.07 201.684   4
 -12  -1   1 5454.43 193.980   4
  -1 -12  -1 5374.78 197.576   2
  -1  12   1 5307.49 201.431   3
  12   1   1 5872.70 107.146   1
  12  -1  -1 5629.36 179.735   3
  12  -1   1 5295.48 161.663   3
 -12   1   1 5257.60 157.133   2
 -12  -1   1 5274.86 137.076   2
  -1 -12   1 5496.92 202.913   2
   1 -12   1 5612.42 213.656   2
 -12  -1  -3 2706.85 149.086   4
  12   1   3 2780.91 113.444   3
 -12   1   3 2794.50 132.083   4
 -12   1   3 2805.96 125.271   2
 -12  -1   3 2979.42 144.322   4
   1  12   3 2762.24 152.952   3
  -1  12   3 2874.25 152.609   3
 -12   1   3 2732.92 137.321   3
  -1 -12   3 2841.88 154.345   2
   1 -12   3 2995.24 159.935   2
  12   1   3 2926.57 94.6798   1
  12  -1   3 2705.68 105.353   3
 -12   1  -3 2831.30 146.160   4
 -12   1  -5 163.021 66.0702   4
 -12  -1  -5 157.276 68.3899   4
  12  -1   5 93.5979 37.2954   1
   1 -12  -5 31.8129 25.3950   4
  -1 -12  -5 139.646 39.9581   4
 -12   1   5 232.920 59.3262   4
  12  -1   5 93.8163 29.8570   3
  12   1   5 26.0229 31.2556   3
   1  12   5 65.4636 62.8244   3
  -1  12   5 85.6918 65.3976   3
 -12   1   5 11.9207 58.2846   3
  12   1   5 31.0065 34.0833   1
  12   1   7 5868.30 130.897   2
  12   1   7 5635.12 176.060   1
  12   1   7 5750.69 134.902   3
   1  12   7 5511.28 228.375   3
 -12   1   7 5375.14 213.599   3
  -1  12   7 5984.99 235.028   3
 -12  -1   7 5533.58 217.272   3
  12  -1   7 5438.64 101.620   3
  12  -1   7 5806.41 173.686   1
 -12   1  -7 5496.53 225.065   4
   1 -12  -7 5885.00 115.920   4
 -12  -1  -7 5487.63 227.527   4
  12  -1   7 5904.69 162.859   2
  -1 -12  -7 5698.91 155.254   4
  12   1   9 458.528 68.5795   1
  12   1   9 384.600 46.7307   2
  12  -1   9 450.820 58.3923   2
   1  12   9 398.239 90.0466   3
 -12   1   9 404.382 83.7571   3
  -1  12   9 333.671 81.1184   3
 -12  -1   9 385.780 84.3195   3
  12  -1   9 375.350 66.2898   1
 -12   1  -9 614.753 99.3477   4
  -1 -12  -9 441.690 50.1642   4
 -12  -1  -9 334.787 82.1081   4
  12   1  11 1511.99 118.040   1
 -12   1  11 1436.90 134.815   3
 -12  -1  11 1374.09 133.353   3
   1  12  11 1568.14 142.840   3
  -1  12  11 1348.25 135.498   3
  12  -1  11 1473.34 121.024   1
 -12   1  13 651.681 105.231   3
 -12  -1  13 625.292 106.705   3
   1  12  13 425.519 100.029   3
  12   1  13 476.965 88.4724   1
  -1  12  13 448.762 96.9335   3
  12  -1  13 589.019 94.8872   1
  12   1  15 1118.49 125.863   1
   1  12  15 1361.58 148.713   3
 -12   2   0 1836.14 112.178   4
  -2 -12   0 1716.17 116.552   2
   2 -12   0 2231.36 143.542   2
 -12  -2   0 1960.00 126.473   4
  -2  12   0 1781.66 116.952   3
 -12   2   0 1929.49 102.292   3
  12  -2   0 1863.15 100.758   3
 -12   2   2 5883.33 185.285   4
 -12  -2  -2 5739.59 212.878   4
  12   2   2 5807.45 171.844   3
 -12  -2   2 5596.89 203.209   4
  -2  12   2 5566.31 206.128   3
 -12   2   2 5880.55 188.777   3
  12  -2   2 5574.53 156.491   3
  -2 -12   2 5956.38 207.488   2
   2 -12   2 5665.95 216.758   2
 -12   2  -2 5710.82 198.935   4
 -12   2   2 5813.54 181.703   2
 -12  -2  -4 12817.6 328.308   4
  12   2  -4 13289.4 173.647   1
 -12   2   4 12962.5 276.611   4
  12   2   4 12847.4 252.919   3
   2 -12  -4 12882.4 201.518   4
  -2 -12  -4 12896.0 268.890   4
   2  12   4 13134.5 335.896   3
 -12   2   4 12406.3 301.767   3
  -2  12   4 13460.7 336.458   3
  12  -2   4 12513.0 218.183   3
   2 -12   4 13412.7 337.287   2
 -12   2  -4 12407.0 312.956   4
  12  -2   6 1142.40 81.6952   2
  -2 -12  -6 1132.10 80.7961   4
 -12  -2  -6 1114.40 113.185   4
 -12   2   6 1146.83 85.3427   4
  12   2   6 1249.33 75.3973   3
  -2  12   6 1253.92 116.649   3
   2  12   6 1212.44 110.933   3
  12  -2   6 1158.44 50.0906   3
 -12   2   6 988.391 98.7641   3
  12   2  -6 1129.84 55.8211   1
  12   2   6 1137.67 82.0548   1
 -12   2  -6 1199.88 112.058   4
   2 -12  -6 1083.85 37.5875   4
 -12  -2  -8 122.907 74.4659   4
  -2 -12  -8 195.655 45.4959   4
  12  -2   8 79.2393 40.8447   2
  12   2   8 203.722 33.7726   2
   2  12   8 225.301 77.6363   3
  12   2   8 128.904 50.8073   1
 -12   2   8 64.4315 61.7320   3
  -2  12   8 170.245 74.4059   3
 -12   2  -8 136.489 73.2423   4
  12   2  10 3668.20 168.450   1
 -12   2  10 3813.81 200.353   3
   2  12  10 3850.93 203.883   3
  -2  12  10 3638.25 201.329   3
  -2 -12 -10 3563.67 135.602   4
 -12  -2 -10 3871.07 215.597   4
  12   2  12 4584.22 207.654   1
 -12   2  12 4527.70 230.576   3
   2  12  12 5002.68 242.348   3
  -2  12  12 5176.56 247.438   3
  12   2  14 169.118 74.1930   1
   2  12  14 126.773 83.7355   3
  -2  12  14 264.979 89.6180   3
   3 -12   1 1821.61 130.512   2
 -12  -3  -1 1730.09 124.292   4
  -3 -12  -1 1873.62 115.613   2
 -12  -3   1 1734.95 125.082   4
  -3  12  -1 1707.92 113.290   3
  -3  12   1 1693.30 115.887   3
 -12   3   1 1852.31 106.454   3
 -12   3  -1 1896.11 97.7474   3
  12  -3   1 1550.46 89.9660   3
  12  -3  -1 1726.83 102.015   3
 -12   3   1 1693.74 102.979   2
  -3 -12   1 1727.92 114.831   2
 -12   3  -1 1742.60 108.845   4
 -12  -3   1 1766.03 64.6253   2
 -12   3   1 1789.55 106.192   4
 -12   3   3 42383.9 599.742   2
 -12   3   3 44448.9 568.508   4
 -12  -3  -3 43842.5 663.168   4
  -3  12  -3 44212.2 598.627   3
 -12   3   3 43805.0 613.340   3
  12   3   3 43927.4 564.381   3
  -3  12   3 44078.2 653.660   3
  12  -3   3 42309.3 507.515   3
  -3 -12   3 45139.3 637.210   2
   3 -12   3 45050.0 678.247   2
 -12   3  -3 44350.5 629.999   4
 -12  -3  -5 30365.4 548.174   4
 -12   3   5 31290.3 443.409   4
  12  -3   5 30706.5 449.442   2
  -3 -12  -5 29583.2 456.343   4
 -12   3   5 29404.9 508.497   3
   3  12   5 29174.9 535.676   3
  12   3   5 30518.6 430.278   3
  12   3  -5 29662.8 357.470   1
  -3  12   5 29774.6 536.746   3
  12  -3   5 30005.5 348.762   3
   3 -12   5 30418.9 544.376   2
 -12   3  -5 30074.7 522.090   4
  -3 -12  -7 6552.01 195.762   4
 -12   3   7 7109.44 190.559   4
 -12   3   7 6649.44 239.889   3
   3  12   7 6658.54 252.178   3
  12   3   7 6882.59 175.700   3
  -3  12   7 7105.81 258.046   3
  12   3   7 6733.87 201.523   1
  12   3  -7 6725.41 158.766   1
  12  -3   7 6911.92 199.916   2
 -12  -3  -7 6242.57 246.272   4
  -3 -12  -9 167.666 51.3018   4
  12  -3   9 239.751 61.3840   2
 -12   3   9 255.904 55.2108   4
  12   3   9 117.430 49.4635   3
  12   3   9 226.843 61.5448   1
   3  12   9 50.2102 67.2357   3
 -12   3   9 113.912 66.2144   3
  -3  12   9 170.747 79.7803   3
 -12   3  11 27972.5 575.594   3
   3  12  11 28794.7 581.235   3
  -3  12  11 30093.1 602.294   3
 -12  -3 -11 28810.9 610.399   4
  12   3  11 28152.2 517.732   1
  12   3  13 5024.34 227.036   1
 -12   3  13 4669.39 239.744   3
   3  12  13 4841.71 243.713   3
  -3  12  13 5293.39 259.136   3
  12   3  15 3036.64 194.845   1
   3  12  15 3335.75 212.397   3
  -4 -12   0 18530.7 361.524   2
   4 -12   0 18966.7 416.276   2
 -12  -4   0 17964.8 392.478   4
 -12   4   0 19084.9 338.010   3
  -4  12   0 18683.9 374.392   3
  12  -4   0 18740.8 336.552   3
 -12   4   0 18780.8 348.247   4
 -12  -4  -2 15588.2 369.905   4
 -12   4   2 15778.7 327.496   3
  -4  12  -2 15813.4 330.245   3
  -4  12   2 16187.7 357.627   3
 -12   4  -2 15822.2 277.393   3
  12  -4   2 15172.1 276.467   3
  -4 -12   2 16346.7 340.236   2
 -12   4   2 15562.8 333.618   2
 -12   4  -2 15609.7 331.134   4
 -12   4   2 16707.1 307.399   4
   4 -12   2 15310.0 376.207   2
 -12   4   4 75620.9 798.806   4
 -12  -4  -4 73588.4 951.300   4
 -12   4   4 73044.0 893.486   3
  -4 -12  -4 72114.6 861.887   4
  -4  12  -4 74941.4 850.498   3
  12  -4   4 73096.7 727.800   3
  -4  12   4 74917.1 933.906   3
  12   4   4 74286.5 822.130   3
   4 -12   4 75034.8 961.823   2
 -12   4  -4 73756.1 904.479   4
 -12  -4  -6 539.658 92.4520   4
   4  12   6 513.682 72.3344   2
   4 -12   6 483.338 84.0833   2
 -12   4   6 582.651 59.7210   4
  -4 -12  -6 584.103 73.8561   4
  -4  12  -6 737.308 71.6467   3
   4  12   6 603.920 90.7138   3
  12  -4   6 526.046 70.5490   2
 -12   4   6 650.663 91.0164   3
  12   4   6 583.336 63.4689   3
  -4  12   6 542.274 89.7613   3
  12   4  -6 575.525 54.1471   1
 -12   4   8 6423.47 169.748   4
 -12   4   8 6244.54 242.558   3
   4  12   8 6118.80 246.808   3
  -4  12   8 6066.71 248.991   3
 -12  -4  -8 6612.31 260.408   4
  -4 -12  -8 6413.48 205.242   4
 -12   4  10 21626.6 485.292   3
   4  12  10 20337.6 470.178   3
  -4  12  10 21093.7 490.066   3
  12   4  10 20265.7 421.310   1
  12  -4  10 20648.5 403.940   2
 -12  -4 -10 20728.8 495.097   4
  -4 -12 -10 20514.8 393.238   4
 -12   4  12 22842.2 529.298   3
   4  12  12 22974.8 521.065   3
  -4  12  12 24500.9 550.971   3
 -12  -4 -12 23689.5 558.527   4
  12   4  12 22708.5 481.791   1
   4  12  14 547.609 106.859   3
  12   4  14 309.077 84.2974   1
 -12   5   1-69.2152 48.0259   4
 -12  -5  -1-34.9139 72.0806   4
 -12  -5   1 65.6980 66.2407   4
 -12  -5   1 18.6517 11.9230   2
  -5 -12   1 27.4103 43.9922   2
   5 -12   1 184.313 67.3806   2
 -12   5   1 16.4381 43.2375   3
  -5  12  -1-26.8506 63.9768   3
 -12   5  -1 3.45006 34.9189   3
  -5  12   1-42.7373 52.2829   3
  12  -5   1 35.8450 38.5670   3
   5 -12  -1 83.1217 28.0700   4
 -12   5  -1 9.60847 43.8910   4
 -12  -5  -3 21440.5 451.824   4
 -12   5   3 21020.0 401.568   3
  -5  12  -3 21382.3 385.736   3
  12  -5   3 21039.6 323.623   3
  -5  12   3 22589.0 441.273   3
 -12   5  -3 21313.7 317.656   3
  -5 -12   3 22095.8 404.672   2
 -12   5  -3 21683.5 407.005   4
 -12   5   3 22456.6 348.825   4
   5 -12  -3 21376.8 226.281   4
   5 -12   3 22161.2 465.368   2
 -12  -5  -5 17782.3 421.539   4
  12  -5   5 17394.9 357.305   2
 -12   5   5 17702.6 386.390   3
  -5 -12  -5 17315.5 366.607   4
  -5  12  -5 18168.1 337.168   3
  -5  12   5 17741.6 402.597   3
   5 -12   5 18214.1 420.481   2
 -12   5   5 18525.8 297.565   4
 -12   5   7 863.232 63.9065   4
 -12  -5  -7 789.921 110.686   4
  -5 -12  -7 733.620 86.6899   4
   5 -12   7 753.965 99.6723   2
  -5  12  -7 756.048 69.6178   3
  12  -5   7 759.565 86.1912   2
   5  12   7 733.721 102.367   3
 -12   5   7 683.156 93.4146   3
  -5  12   7 813.607 103.074   3
 -12  -5  -9 380.048 93.5123   4
  -5 -12  -9 409.073 70.3782   4
  12  -5   9 451.060 75.1533   2
 -12   5   9 412.457 88.3212   3
   5  12   9 452.540 90.9645   3
  -5  12   9 477.630 98.8856   3
 -12   5  11 15672.8 426.435   3
   5  12  11 15227.4 415.974   3
  -5  12  11 15682.9 434.588   3
  12   5  11 15078.7 379.699   1
 -12  -5 -11 15449.0 439.806   4
  -5 -12 -11 15541.1 357.869   4
   5  12  13 2839.92 192.110   3
  -5  12  13 2747.71 198.093   3
  12   5  13 2899.75 182.340   1
 -12  -5 -13 2920.99 202.411   4
   5  12  15 359.455 95.1644   3
  -6 -12   0 1779.20 106.615   2
 -12   6   0 1597.46 98.7113   3
 -12  -6   0 1558.00 128.834   4
  12  -6   0 1663.94 104.699   3
  -6  12   0 1804.30 118.532   3
 -12   6   0 1655.79 100.724   4
   6 -12   0 1561.38 79.7048   4
   6 -12   2 2210.48 152.120   2
 -12   6   2 2023.81 121.692   3
 -12  -6  -2 1978.56 141.544   4
 -12   6  -2 2233.44 104.203   3
  12  -6   2 2148.82 105.883   3
  -6  12  -2 2031.39 117.462   3
  -6  12   2 1995.37 129.553   3
  -6 -12   2 2100.18 118.146   2
   6 -12   2 2034.81 106.778   4
 -12   6   2 2019.27 99.8951   4
   6 -12  -2 2176.63 70.2030   4
 -12   6   4 35.5774 35.8820   4
 -12  -6  -4 60.1825 75.8091   4
  -6 -12  -4 125.489 62.8253   4
   6 -12   4 52.6002 68.7453   2
 -12   6   4 62.6528 59.4185   3
  12  -6   4 55.3533 34.2197   3
  12  -6   4 27.3564 52.5022   2
  -6  12  -4 53.6885 41.8455   3
 -12   6  -4 54.2074 27.7329   3
  -6  12   4 13.4724 58.7673   3
  12  -6   6 2021.03 132.572   2
 -12  -6  -6 2166.87 159.010   4
 -12   6   6 2084.69 141.974   3
  -6 -12  -6 1947.28 132.826   4
  -6  12  -6 2190.16 108.852   3
  -6  12   6 2234.02 153.225   3
   6 -12   6 2351.68 158.433   2
 -12   6   6 2186.74 87.4485   4
  -6 -12  -8 1310.08 112.480   4
 -12  -6  -8 1032.30 120.407   4
   6 -12   8 1243.02 125.814   2
  -6  12  -8 1221.27 78.5783   3
 -12   6   8 1304.74 123.449   3
   6  12   8 1159.10 122.245   3
  12  -6   8 1138.39 105.922   2
  -6  12   8 1138.08 123.756   3
  -6 -12 -10 680.197 89.6596   4
 -12  -6 -10 626.949 106.498   4
  12  -6  10 461.789 80.8039   2
 -12   6  10 476.083 102.393   3
  12   6  10 560.026 71.1170   3
   6  12  10 626.883 102.202   3
  -6  12  10 522.654 99.8177   3
  12   6  12 201.184 75.7696   1
 -12   6  12 202.127 84.4542   3
   6  12  12 122.163 75.3433   3
  -6 -12 -12 100.842 62.2535   4
 -12  -6 -12 252.406 97.7785   4
  -6  12  12 233.887 94.5160   3
   6  12  14 933.951 124.054   3
 -12   7   1 6372.18 203.315   3
 -12   7  -1 6380.03 188.297   3
 -12  -7  -1 6289.76 241.631   4
   7 -12   1 6312.53 247.760   2
  12  -7   1 6176.29 200.301   4
  12  -7   1 6053.04 188.296   3
  -7 -12   1 6470.56 196.626   2
  -7  12  -1 6251.52 205.684   3
  -7  12   1 5989.28 211.944   3
   7 -12   1 5924.25 169.179   4
   7 -12  -1 6364.87 144.560   4
   7 -12   3 7786.63 279.074   2
 -12   7   3 7256.71 233.033   3
 -12  -7  -3 7507.19 272.473   4
 -12   7  -3 7652.73 183.568   3
  -7 -12  -3 7126.93 250.825   4
  12  -7   3 7099.11 183.953   3
  -7  12  -3 7698.16 220.322   3
  -7  12   3 7358.76 246.278   3
  -7 -12   3 7584.92 221.432   2
   7 -12   3 6780.07 206.542   4
 -12  -7  -5 519.010 93.2559   4
  -7 -12  -5 576.763 88.4091   4
 -12   7   5 559.216 83.9150   3
   7 -12   5 525.317 94.4469   2
  12  -7   5 503.560 81.9777   2
 -12   7  -5 503.449 39.8102   3
  -7  12  -5 494.383 61.7051   3
  -7  12   5 501.439 87.8036   3
 -12   7   5 547.198 48.2249   4
 -12  -7  -7 7013.80 276.382   4
 -12   7   7 6738.34 257.698   3
  -7 -12  -7 6460.17 241.244   4
  -7  12  -7 7270.18 184.005   3
  -7  12   7 7041.34 269.122   3
   7 -12   7 6921.83 268.530   2
  12  -7   7 7014.21 247.770   2
 -12  -7  -9 287.208 85.5092   4
  -7 -12  -9 224.439 72.1300   4
   7 -12   9 397.026 98.0856   2
  12  -7   9 376.358 82.8451   2
 -12   7   9 479.619 95.4047   3
   7  12   9 297.400 82.3520   3
  -7  12   9 149.476 76.9169   3
 -12   7  11 3695.54 218.139   3
   7  12  11 3736.67 207.232   3
  -7  12  11 3749.88 220.724   3
  12  -7  11 3755.24 195.708   2
 -12  -7 -11 3629.56 223.865   4
  -7 -12 -11 3599.56 189.714   4
  12   7  13 61.0188 66.9314   1
   7  12  13 63.9606 76.4640   3
 -12   8   0 4556.68 168.765   3
  -8 -12   0 4687.96 154.212   2
 -12  -8   0 4504.95 214.979   4
  -8  12   0 4457.32 180.255   3
   8 -12   2 4.67219 38.7458   4
 -12  -8  -2 26.4791 65.7804   4
 -12   8   2 37.0516 51.8809   3
  -8 -12   2 36.0025 42.0535   2
 -12   8  -2 2.17102 36.4217   3
   8 -12   2 55.5718 67.5766   2
  -8  12  -2-39.3047 41.1488   3
  -8  12   2-8.75429 53.8207   3
   8 -12   4 5983.05 250.389   2
 -12  -8  -4 5961.13 254.684   4
  -8 -12  -4 5506.29 228.601   4
  12  -8   4 5627.92 222.678   2
 -12   8  -4 5824.47 150.708   3
  -8  12  -4 5804.50 180.913   3
  -8  12   4 5541.74 225.425   3
 -12   8   4 5249.75 211.333   3
 -12  -8  -6 715.068 110.812   4
  -8 -12  -6 837.091 106.379   4
 -12   8   6 861.498 103.231   3
   8 -12   6 850.615 111.155   2
  12  -8   6 810.689 99.9122   2
  -8  12  -6 930.825 69.7056   3
  -8  12   6 911.058 112.733   3
 -12   8   8 2721.89 176.055   3
  -8 -12  -8 2726.85 170.183   4
   8  12   8 2502.65 168.241   3
  -8  12   8 2886.66 181.554   3
   8 -12   8 2842.73 181.866   2
  12  -8   8 2678.70 165.784   2
 -12  -8  -8 2885.12 191.028   4
  -8  12  10 1007.18 124.862   3
 -12  -8 -10 1020.27 134.885   4
  -8 -12 -10 1014.95 118.375   4
   8 -12  10 1207.82 133.025   2
  12  -8  10 1127.35 121.543   2
 -12   8  10 1152.47 132.821   3
  12   8  10 1027.66 102.585   3
   8  12  10 1272.33 134.667   3
 -12  -8 -12 1295.46 145.985   4
  -8 -12 -12 1270.13 133.441   4
  12  -8  12 1234.45 130.887   2
   8  12  12 1155.95 130.304   3
   8  12  14 1416.93 149.449   3
 -12   9   1 303.179 62.2304   3
 -12  -9  -1 387.430 90.0912   4
 -12   9  -1 243.946 50.4171   3
  -9 -12   1 335.438 50.9390   2
  -9  12  -1 296.434 59.3507   3
  -9  12   1 288.786 65.7077   3
 -12   9   3 195.144 63.7353   3
  -9 -12   3 207.464 50.2578   2
 -12  -9  -3 283.361 93.3788   4
  -9 -12  -3 248.440 80.2760   4
 -12   9  -3 168.881 41.0095   3
   9 -12   3 367.565 90.5661   2
  -9  12  -3 299.535 55.2355   3
  -9  12   3 268.029 75.1466   3
 -12  -9  -5 1172.51 127.588   4
 -12   9   5 1215.37 117.506   3
  -9 -12  -5 1189.06 124.502   4
   9 -12   5 1073.04 127.836   2
  12  -9   5 1153.64 118.533   2
  -9  12  -5 1284.38 82.5068   3
  -9  12   5 1334.00 125.503   3
 -12  -9  -7-0.09424 77.0717   4
  -9 -12  -7 126.788 69.8368   4
 -12   9   7 97.0553 71.2994   3
   9 -12   7 47.2125 74.5187   2
  12  -9   7 82.0674 69.2503   2
  -9  12   7 27.0066 70.8302   3
  -9  12   9 26.1793 78.3099   3
 -12  -9  -9-35.7373 89.9402   4
  -9 -12  -9 15.3657 66.1687   4
   9 -12   9 8.02958 75.7640   2
 -12   9   9-44.4063 78.5013   3
  12  -9   9 48.6484 70.7736   2
   9  12   9-43.1236 75.6925   3
 -12  -9 -11 337.459 102.149   4
  -9 -12 -11 241.373 90.7428   4
   9 -12  11 285.866 93.0208   2
  12  -9  11 262.095 88.4271   2
   9  12  11 260.230 86.1737   3
  12  -9  13 496.873 102.477   2
   9  12  13 355.682 88.9750   3
  -9 -12 -13 719.884 115.172   4
 -10  12   0 5914.79 210.494   3
 -12  10   0 5830.88 202.667   3
 -12 -10  -2 3901.94 214.960   4
 -10 -12  -2 3644.78 201.363   4
 -10  12  -2 4078.98 163.009   3
 -10  12   2 3880.43 181.766   3
 -12  10   2 3662.84 173.715   3
 -10 -12   2 4067.88 145.624   2
 -12  10  -2 4033.63 154.608   3
  10 -12   4 19890.5 480.234   2
 -12 -10  -4 19432.5 474.710   4
 -10 -12  -4 18876.1 465.683   4
  12 -10   4 19596.4 457.038   2
 -10  12  -4 19406.8 342.315   3
 -10  12   4 18913.1 430.843   3
 -12  10   4 18748.2 425.323   3
 -10  12   6 318.291 86.1071   3
 -12 -10  -6 85.8225 91.8618   4
 -12  10   6 275.503 80.6047   3
 -10 -12  -6 223.539 94.2008   4
  10 -12   6 347.312 92.4774   2
  12 -10   6 364.528 88.4035   2
 -10 -12  -8 2273.56 175.044   4
 -10  12   8 2349.94 173.085   3
  10 -12   8 2467.78 177.994   2
  12 -10   8 2643.69 181.801   2
 -12  10   8 2330.91 172.565   3
 -12 -10  -8 2251.50 176.281   4
  12  10  10 4488.82 217.044   3
  10  12  10 4338.55 227.236   3
  10 -12  10 4854.62 251.828   2
  12 -10  10 4181.24 227.474   2
 -12 -10 -10 4251.29 243.415   4
 -10 -12 -10 4305.84 231.511   4
 -12  10  10 4393.60 239.663   3
  10  12  12 7295.20 299.085   3
  12 -10  12 7466.57 308.752   2
 -10 -12 -12 7582.77 312.039   4
 -12 -11  -1 1413.37 140.187   4
 -11 -12  -1 1202.27 133.058   4
 -11  12   1 1356.62 114.832   3
 -11  12  -1 1200.10 100.049   3
 -12  11   1 1424.76 112.931   3
 -12  11  -1 1322.19 100.555   3
 -12 -11  -3 27367.5 583.820   4
 -11 -12  -3 26257.4 569.154   4
 -11  12   3 26198.2 511.568   3
 -11  12  -3 26885.5 435.767   3
 -12  11   3 26406.1 511.075   3
 -12 -11  -5 15459.6 435.707   4
  11 -12   5 15372.2 425.459   2
 -11 -12  -5 14952.2 428.026   4
  12 -11   5 15082.3 415.721   2
 -11  12   5 14264.0 389.216   3
 -12  11   5 14559.9 390.530   3
  12 -11   7 3696.57 215.129   2
 -12 -11  -7 3625.44 219.088   4
 -11 -12  -7 3645.90 214.132   4
 -11  12   7 3926.49 219.749   3
 -12  11   7 3746.87 209.288   3
  11 -12   7 3796.35 223.375   2
 -12 -11  -9-64.5251 87.0760   4
 -11 -12  -9-51.4500 89.5986   4
 -11  12   9 86.9518 78.7320   3
 -12  11   9 118.656 84.6603   3
  11 -12   9-25.5836 87.9178   2
  12 -11   9 103.938 79.4487   2
  11  12   9 149.498 86.2473   3
  11  12  11 17317.9 458.968   3
 -11 -12 -11 16992.8 481.858   4
 -12  12   0 3540.01 169.682   3
 -12 -12  -2 6631.60 282.383   4
 -12  12   2 6699.39 246.577   3
 -12  12  -2 6883.24 216.168   3
 -12 -12  -4 21066.8 515.893   4
 -12  12   4 20910.5 472.693   3
 -12  12   6 713.128 110.593   3
 -12 -12  -6 474.671 112.251   4
  12 -12   6 843.175 121.953   2
 -12 -12  -8 475.628 105.786   4
 -12  12   8 493.152 102.167   3
  12 -12   8 416.330 96.8628   2
  12  12  10 6234.09 276.214   3
   0 -13   1 3081.50 166.581   2
 -13   0  -1 3024.97 154.168   4
 -13   0   1 3039.00 152.144   4
 -13   0   1 3075.79 114.921   2
  13   0   1 3107.90 131.935   3
  13   0   3-4.12777 37.8995   3
  13   0   3 68.2263 28.5010   1
 -13   0   3 55.7780 56.2212   4
   0 -13   3 80.9982 62.5195   2
 -13   0  -3-5.68501 56.0913   4
   0  13   3 87.5535 61.7518   3
 -13   0   3 75.9642 39.7708   2
 -13   0  -5 184.695 69.7693   4
  13   0   5 211.281 39.8088   3
   0 -13   5 218.820 76.3046   2
   0 -13  -5 228.693 41.6217   4
 -13   0   5 143.771 59.1869   4
   0  13   5 145.873 69.7844   3
 -13   0   5 158.127 63.4125   3
  13   0   5 292.211 46.2672   1
  13   0   7 3193.32 107.823   2
   0  13   7 3201.61 184.697   3
  13   0   7 2454.43 118.161   1
 -13   0   7 3301.40 177.118   3
 -13   0  -7 3268.46 183.615   4
   0 -13  -7 3217.39 105.012   4
 -13   0   9 1939.24 147.885   3
  13   0   9 1804.10 116.126   1
   0  13   9 1533.74 138.405   3
 -13   0  -9 1687.40 151.080   4
  13   0  11 145.277 62.8125   1
   0  13  11 19.0767 80.4932   3
   0  13  13 173.496 83.2128   3
  13   0  13 163.179 76.0196   1
  13   0  15 1731.98 152.335   1
 -13   1   0 1888.51 122.296   4
 -13  -1   0 2084.22 133.169   4
  -1 -13   0 1827.49 128.132   2
   1 -13   0 1994.45 143.047   2
  -1  13   0 2083.97 131.115   3
  13   1   0 1758.25 37.1449   1
  13  -1   2 167.125 42.7912   3
 -13   1  -2 115.776 61.0635   4
 -13  -1  -2 117.322 60.0019   4
 -13   1   2 117.489 54.6486   4
 -13  -1   2 109.836 60.8108   4
  13   1   2 111.275 42.1480   3
  -1 -13   2 136.539 62.3949   2
 -13   1   2 93.6842 45.4942   2
   1 -13   2 150.310 69.1529   2
 -13  -1   2 44.7081 32.3373   2
  -1  13   2 59.1777 60.8399   3
  13   1   2 92.0517 25.6283   1
  13   1   4 1851.98 85.1628   1
  13   1   4 1818.93 95.3943   3
 -13   1   4 1982.68 118.895   4
 -13   1   4 1814.46 109.517   2
 -13  -1   4 1848.32 122.396   4
   1 -13  -4 1902.16 85.7937   4
  -1 -13  -4 1845.59 99.3482   4
   1  13   4 1797.07 136.097   3
  -1  13   4 1910.41 139.352   3
 -13   1   4 1739.01 118.777   3
  -1 -13   4 1855.35 132.415   2
  13  -1   4 1882.64 89.1037   3
   1 -13   4 1924.06 138.883   2
 -13   1  -4 1747.01 132.612   4
 -13  -1  -4 1843.61 137.296   4
  13   1   6 59.3617 38.2806   1
 -13   1  -6-38.4260 60.3102   4
 -13  -1  -6 7.98166 62.8044   4
   1 -13  -6 38.4024 24.7020   4
  -1 -13  -6 26.0288 33.5392   4
 -13   1   6 35.1663 50.5552   4
   1  13   6 6.67849 62.6745   3
  -1  13   6 36.4920 63.1137   3
 -13   1   6 45.7388 56.7776   3
  13  -1   6 14.6903 36.9823   1
  13   1   8 1856.80 110.325   1
   1  13   8 2645.87 170.298   3
  -1  13   8 2418.56 166.736   3
 -13   1   8 2330.80 156.871   3
 -13   1  -8 2359.21 163.709   4
 -13  -1  -8 2901.21 180.162   4
  -1 -13  -8 2506.75 103.587   4
  13  -1   8 2244.89 120.769   1
  13  -1   8 2366.19 110.120   2
  13   1  10 52.7046 52.8574   1
  13  -1  10 106.545 58.2428   1
 -13   1  10-26.3819 76.5387   3
   1  13  10-84.9476 87.5881   3
 -13  -1  10-103.420 93.2601   3
  -1  13  10-119.419 95.0211   3
 -13  -1 -10 30.3416 80.5066   4
  13  -1  12 1127.01 113.863   1
 -13   1  12 1204.04 134.894   3
 -13  -1  12 924.354 121.193   3
   1  13  12 889.534 126.073   3
  -1  13  12 977.543 124.231   3
  13   1  12 1013.19 107.224   1
  13   1  14 147.695 72.7327   1
 -13   2  -1-47.6545 56.7162   4
 -13   2   1 8.67657 46.9226   4
 -13  -2  -1 7.22179 59.7158   4
 -13   2   1-3.63460 38.5908   2
 -13  -2   1-59.7905 60.9911   4
 -13  -2   1 32.0310 26.2281   2
  -2  13  -1 34.3797 56.0745   3
  -2 -13   1-6.75287 57.0543   2
  -2  13   1-37.8079 63.6653   3
   2 -13   1-14.5342 65.0330   2
 -13   2   1 10.0423 45.0934   3
  13  -2   1-2.82691 36.0257   3
 -13   2   3 4023.22 159.428   2
 -13  -2  -3 4063.64 190.187   4
 -13   2   3 4155.57 162.141   4
  13   2   3 3990.58 146.384   3
 -13  -2   3 4147.10 180.263   4
  -2  13   3 3648.42 180.796   3
 -13   2   3 4049.65 169.897   3
  13  -2   3 4109.60 133.421   3
  -2 -13   3 4111.93 185.529   2
   2 -13   3 4008.35 193.203   2
 -13   2  -3 3997.50 176.648   4
  13   2  -3 3992.82 68.0813   1
   2 -13  -5 2156.07 70.4657   4
 -13   2   5 2148.99 118.691   4
  13   2   5 2140.15 102.695   3
  -2 -13  -5 2130.84 111.037   4
   2  13   5 2370.59 157.024   3
 -13   2   5 2174.39 136.733   3
  -2  13   5 2278.43 149.978   3
  13  -2   5 2128.04 83.2002   3
   2 -13   5 2291.68 152.330   2
  13   2   5 2202.92 102.633   1
 -13   2  -5 2212.19 145.027   4
 -13  -2  -5 2070.67 144.598   4
 -13  -2  -7 80.1969 67.9159   4
  -2 -13  -7 146.609 41.7239   4
 -13   2   7 128.056 51.8654   4
  13  -2   7 65.0116 38.2028   2
   2  13   7 20.0075 65.6974   3
  13   2   7 67.3257 38.5588   1
 -13   2   7 233.750 75.1879   3
  -2  13   7 108.527 65.9962   3
 -13   2  -7 56.7766 64.7177   4
 -13  -2  -9 77.1451 75.5465   4
  -2 -13  -9 27.2646 37.3780   4
  13  -2   9 57.1148 43.8883   2
   2  13   9 108.346 75.8857   3
 -13   2   9 27.8572 67.7597   3
  -2  13   9-4.45355 81.4370   3
  13   2   9 126.760 53.5124   1
  13   2  11 1767.41 130.696   1
 -13   2  11 1827.37 153.842   3
   2  13  11 2073.88 163.282   3
  -2  13  11 1765.12 152.682   3
 -13  -2 -11 2121.71 170.598   4
  13   2  13 825.920 107.596   1
   2  13  13 694.780 113.024   3
  -2  13  13 698.614 120.453   3
 -13   3   0 123.669 51.6534   4
 -13  -3   0 102.224 63.6999   4
  -3  13   0 146.642 59.7434   3
  -3 -13   0 194.765 65.3587   2
   3 -13   0 162.154 74.0675   2
 -13   3   0 164.671 47.6413   3
  13  -3   0 188.661 49.4471   3
 -13   3   2 3095.23 139.011   4
 -13  -3  -2 2902.45 164.666   4
 -13  -3   2 3083.80 98.9579   2
 -13  -3   2 3122.16 165.038   4
  -3  13  -2 3110.79 155.488   3
  -3  13   2 3177.65 166.619   3
 -13   3   2 3121.52 147.452   3
  13  -3   2 2746.07 116.406   3
 -13   3   2 2904.01 139.031   2
  -3 -13   2 2970.94 155.678   2
 -13   3  -2 2831.79 145.948   4
   3 -13   2 3215.72 177.634   2
 -13  -3  -4 7142.72 256.737   4
 -13   3   4 6964.73 202.612   4
   3 -13  -4 7044.62 125.916   4
  -3 -13  -4 6620.54 207.428   4
  13   3   4 6685.14 194.751   3
  -3  13  -4 7133.72 220.455   3
 -13   3   4 6919.74 232.188   3
  -3  13   4 7130.42 252.917   3
  13   3  -4 6935.07 132.005   1
  13  -3   4 6906.38 163.152   3
  -3 -13   4 6974.42 238.591   2
   3 -13   4 7328.55 263.583   2
 -13   3  -4 6972.08 239.439   4
  -3 -13  -6 1588.00 103.142   4
 -13   3   6 1599.37 99.5446   4
  13  -3   6 1167.86 90.1631   2
  13   3   6 1380.00 86.9926   3
 -13   3   6 1490.87 121.934   3
   3  13   6 1524.13 132.131   3
  -3  13   6 1612.73 133.993   3
  13   3   6 1583.63 96.1993   1
   3 -13   6 1504.93 132.242   2
 -13   3  -6 1810.15 137.048   4
 -13  -3  -6 1710.92 138.356   4
 -13  -3  -8 99.0762 73.6895   4
  -3 -13  -8 42.7142 42.9655   4
 -13   3   8 77.5228 46.7487   4
  13  -3   8 56.7784 49.9637   2
  13   3   8 107.184 56.9852   1
   3  13   8 100.001 69.5661   3
 -13   3   8 113.150 73.8623   3
  -3  13   8 87.0656 70.0516   3
 -13   3  10 3090.37 187.125   3
   3  13  10 2915.93 186.214   3
  -3  13  10 2955.71 190.453   3
  13  -3  10 3214.61 152.067   2
 -13  -3 -10 2993.16 197.672   4
  13   3  10 2919.78 156.108   1
  13   3  12 2891.97 170.563   1
 -13   3  12 2951.15 193.398   3
   3  13  12 2686.97 190.610   3
  -3  13  12 2959.20 201.190   3
 -13  -3 -12 2804.94 199.869   4
  13   3  14-19.7370 70.0184   1
   3  13  14-22.5338 78.2295   3
 -13  -4  -1 1462.71 122.471   4
 -13  -4   1 1423.93 119.851   4
 -13   4   1 1530.80 103.557   3
  -4  13  -1 1422.05 112.249   3
  -4  13   1 1404.58 113.680   3
 -13   4  -1 1467.65 92.1247   3
   4 -13   1 1115.61 117.425   2
  13  -4   1 1308.27 89.0973   3
 -13  -4   1 1335.75 43.8339   2
 -13   4  -1 1410.54 106.367   4
 -13   4   1 1323.83 96.4145   4
  -4 -13   1 1399.58 109.700   2
 -13  -4  -3 8495.96 283.490   4
 -13   4   3 8739.59 253.911   3
  -4  13  -3 9131.91 250.228   3
  -4  13   3 8735.62 275.752   3
  13  -4   3 8250.61 194.970   3
  -4 -13   3 8858.75 263.606   2
 -13   4  -3 8439.20 256.087   4
   4 -13   3 9641.61 306.997   2
 -13   4   3 9000.64 226.893   4
 -13  -4  -5 4865.88 221.783   4
 -13   4   5 4848.34 160.904   4
  -4 -13  -5 4513.28 178.907   4
 -13   4   5 4901.34 204.864   3
  -4  13  -5 5184.08 182.167   3
  -4  13   5 5208.18 224.568   3
   4 -13   5 5067.73 224.753   2
 -13   4  -5 4712.98 202.363   4
 -13  -4  -7 692.190 108.317   4
  -4 -13  -7 545.788 72.7292   4
   4 -13   7 668.306 101.766   2
 -13   4   7 555.819 62.4247   4
  -4  13  -7 588.703 69.0560   3
  13  -4   7 561.150 77.4880   2
   4  13   7 604.060 99.7118   3
 -13   4   7 669.247 97.8778   3
  -4  13   7 573.900 100.621   3
 -13   4   9 1776.36 147.936   3
   4  13   9 1857.50 151.288   3
  -4  13   9 1827.68 151.975   3
  13   4   9 1970.94 127.960   1
  13  -4   9 1843.49 121.625   2
 -13  -4  -9 1864.17 157.106   4
  -4 -13  -9 1602.65 110.195   4
 -13   4  11 3636.48 213.373   3
   4  13  11 3364.57 205.392   3
  -4  13  11 3869.31 223.948   3
  13  -4  11 3886.48 177.509   2
  13   4  11 3675.23 185.057   1
 -13  -4 -11 3477.81 216.879   4
  13   4  13 1782.34 146.778   1
   4  13  13 1847.14 167.628   3
 -13   5   0 270.762 59.8923   4
 -13  -5   0 258.151 76.8954   4
  -5 -13   0 252.534 58.7542   2
  -5  13   0 262.699 63.3819   3
 -13   5   0 237.835 52.6468   3
   5 -13   2 2051.90 149.392   2
 -13  -5  -2 2182.24 151.073   4
 -13  -5   2 2142.08 145.944   4
 -13   5   2 2142.80 124.387   3
  -5  13  -2 2072.52 124.871   3
  13  -5   2 2044.57 105.102   3
  -5  13   2 2247.38 140.922   3
 -13   5  -2 2249.75 105.772   3
  -5 -13   2 2254.90 131.802   2
 -13   5  -2 2214.90 129.664   4
 -13   5   2 2147.62 113.427   4
 -13  -5  -4 5698.75 241.684   4
 -13   5   4 5938.54 219.470   3
  -5 -13  -4 5882.45 214.574   4
  -5  13  -4 5872.81 197.675   3
  -5  13   4 6060.00 236.585   3
   5 -13   4 6405.09 253.610   2
 -13   5   4 6012.28 174.271   4
 -13   5   6 1090.66 75.4543   4
 -13  -5  -6 1194.86 126.700   4
  -5 -13  -6 1060.47 101.037   4
   5 -13   6 1096.66 120.817   2
  -5  13  -6 1089.25 87.2640   3
   5  13   6 1260.07 121.414   3
  13  -5   6 780.604 84.5199   2
 -13   5   6 1105.14 111.111   3
  -5  13   6 1195.46 119.465   3
 -13  -5  -8 194.129 78.8458   4
  -5 -13  -8 123.309 57.9912   4
   5 -13   8 178.306 74.0642   2
  13  -5   8 164.855 61.3798   2
   5  13   8 257.244 81.0167   3
  -5  13  -8 170.470 43.7880   3
 -13   5   8 124.867 73.6109   3
  -5  13   8 189.825 79.8481   3
 -13  -5 -10 1771.68 159.535   4
 -13   5  10 1757.61 152.485   3
   5  13  10 1660.67 146.371   3
  -5  13  10 1617.44 149.439   3
  13   5  10 1797.08 131.510   1
  13  -5  10 1654.80 126.667   2
  -5 -13 -10 1820.97 123.552   4
   5  13  12 2314.56 176.329   3
  13  -5  12 2356.82 151.368   2
  13   5  12 2324.51 160.447   1
 -13  -5 -12 2226.69 184.697   4
   5  13  14 304.454 100.179   3
 -13  -6  -1 279.149 81.9391   4
 -13  -6   1 235.061 82.7124   4
  -6 -13   1 101.144 52.8528   2
 -13   6   1 126.502 50.6526   3
   6 -13   1 37.6298 69.2365   2
 -13   6  -1 132.874 44.9944   3
  13  -6   1 79.8110 45.8266   3
  -6  13  -1 83.7451 52.1035   3
  -6  13   1 114.341 59.9841   3
 -13   6  -1 140.509 54.7714   4
   6 -13   1 132.509 41.7888   4
 -13   6   1 138.849 49.1149   4
   6 -13   3 1893.64 151.573   2
 -13  -6  -3 1944.50 149.688   4
 -13   6   3 1695.13 121.556   3
  -6  13  -3 1922.60 116.709   3
 -13   6  -3 2071.28 96.8890   3
  -6  13   3 2000.68 138.384   3
  -6 -13   3 2054.05 125.796   2
 -13   6   3 1981.55 100.967   4
 -13  -6  -5 900.493 112.812   4
  -6 -13  -5 748.977 96.9408   4
   6 -13   5 723.371 106.070   2
  -6  13  -5 902.942 80.4956   3
 -13   6   5 862.384 99.2621   3
  13  -6   5 796.961 92.5487   2
  -6  13   5 781.992 101.370   3
 -13   6   5 965.618 69.5934   4
 -13  -6  -7 120.469 79.7648   4
  -6 -13  -7 46.5843 59.4262   4
   6 -13   7 145.731 78.0601   2
   6  13   7 235.523 77.8054   3
  13  -6   7 147.964 62.0422   2
 -13   6   7 207.756 71.4212   3
  -6  13  -7 147.181 48.6796   3
  -6  13   7 216.930 78.3281   3
 -13  -6  -9-51.6960 82.2129   4
  -6 -13  -9-37.1942 65.9453   4
   6 -13   9-118.550 86.2282   2
  13  -6   9-39.0998 67.5560   2
 -13   6   9 73.2318 76.0416   3
   6  13   9 5.00223 76.8210   3
  -6  13   9 19.9141 70.4699   3
 -13  -6 -11 378.854 95.5308   4
  -6 -13 -11 407.146 79.8427   4
  13   6  11 278.466 77.1947   1
  13  -6  11 248.756 70.6197   2
 -13   6  11 384.350 93.3288   3
   6  13  11 541.590 109.044   3
  -6  13  11 410.061 97.8593   3
  13   6  13 679.651 102.260   1
   6  13  13 749.988 118.005   3
 -13   7   0 2151.40 119.327   3
  -7 -13   0 2236.63 121.303   2
 -13  -7   0 2185.86 157.503   4
  -7  13   0 2453.86 141.815   3
 -13  -7  -2 154.242 81.0539   4
  -7 -13   2 113.759 49.9750   2
 -13   7   2 127.527 53.8940   3
   7 -13   2 175.450 81.7712   2
 -13   7  -2 207.128 45.5328   3
  -7  13  -2 157.959 54.1973   3
  -7  13   2 193.004 64.7615   3
 -13  -7  -4 695.922 108.159   4
  -7 -13  -4 695.494 97.3861   4
 -13   7   4 383.594 76.8452   3
   7 -13   4 720.870 110.309   2
 -13   7  -4 613.730 53.9014   3
  -7  13  -4 694.280 75.1113   3
  -7  13   4 707.373 101.348   3
 -13   7   4 667.464 59.7955   4
 -13  -7  -6 122.545 79.4192   4
  -7 -13  -6 96.8905 64.2182   4
   7 -13   6 111.063 76.3766   2
 -13   7   6 202.090 73.2519   3
  13  -7   6 192.461 70.9868   2
  -7  13  -6 129.195 43.2872   3
  -7  13   6 71.3524 69.4408   3
  -7 -13  -8 1591.94 131.042   4
 -13   7   8 1855.63 152.716   3
   7  13   8 1582.29 148.564   3
  -7  13   8 1735.63 152.725   3
   7 -13   8 1961.37 164.148   2
  13  -7   8 1716.79 136.508   2
 -13  -7  -8 2190.05 176.981   4
 -13  -7 -10 71.9259 90.3165   4
  -7 -13 -10 56.6833 70.0625   4
   7 -13  10 12.2153 82.6227   2
  13  -7  10 32.6010 70.6102   2
 -13   7  10 34.1709 81.3698   3
   7  13  10 27.3723 74.8483   3
  -7  13  10-9.01135 78.2577   3
  13   7  12 376.182 85.5137   1
  13  -7  12 472.817 95.2046   2
   7  13  12 541.982 101.143   3
  -8 -13   1 2293.04 121.207   2
 -13   8   1 2217.16 131.354   3
 -13   8  -1 2112.16 115.658   3
 -13  -8  -1 2263.26 163.243   4
 -13  -8   1 2282.22 161.983   4
  -8  13  -1 2207.50 133.097   3
  -8  13   1 2075.02 136.590   3
 -13  -8  -3 329.643 91.9214   4
  -8 -13   3 215.212 50.6543   2
  -8 -13  -3 302.895 85.9405   4
 -13   8   3 160.035 63.5538   3
   8 -13   3 237.848 84.9477   2
 -13   8  -3 275.484 46.8819   3
  -8  13  -3 200.396 57.2803   3
  -8  13   3 253.316 75.8045   3
 -13  -8  -5-9.28018 80.1298   4
  -8 -13  -5 40.6700 66.3766   4
 -13   8   5-122.826 87.5745   3
   8 -13   5 36.2647 72.4739   2
  13  -8   5 16.4705 62.5193   2
  -8  13  -5 33.8406 37.4502   3
  -8  13   5 1.12963 69.8343   3
 -13  -8  -7 1598.91 153.964   4
  13  -8   7 1897.25 145.013   2
 -13   8   7 1754.81 148.599   3
  -8 -13  -7 1565.29 138.777   4
  -8  13   7 1682.25 147.427   3
   8 -13   7 2106.26 168.807   2
 -13  -8  -9 998.589 132.897   4
  -8 -13  -9 1087.61 119.496   4
   8 -13   9 1138.04 135.127   2
  13  -8   9 903.500 114.146   2
 -13   8   9 1035.07 127.217   3
   8  13   9 1120.25 132.992   3
  -8  13   9 1147.51 133.230   3
 -13  -8 -11 133.181 92.0182   4
  -8 -13 -11-2.07804 73.7992   4
  13  -8  11 33.8348 73.4495   2
   8  13  11 93.6954 75.2576   3
  13  -8  13 50.8256 75.8353   2
   8  13  13 124.944 85.2298   3
 -13   9   0 1514.69 107.576   3
 -13  -9   0 1502.65 141.284   4
  -9  13   0 1356.71 109.227   3
 -13  -9  -2-12.4004 76.5185   4
  -9 -13  -2-6.89932 67.3402   4
 -13   9   2 90.1716 55.9628   3
  -9 -13   2 8.77982 42.3237   2
 -13   9  -2 35.3016 38.2098   3
  -9  13  -2-22.5846 48.8304   3
  -9  13   2-148.571 80.7195   3
   9 -13   4 1491.16 146.703   2
 -13  -9  -4 1649.59 150.968   4
  -9 -13  -4 1594.46 144.461   4
 -13   9   4 1226.75 114.413   3
  -9  13  -4 1677.85 104.814   3
  -9  13   4 1541.42 135.051   3
  -9 -13   4 1717.65 113.621   2
 -13  -9  -6-38.4868 91.5859   4
  -9 -13  -6-56.1428 77.3097   4
 -13   9   6-90.9122 76.0977   3
   9 -13   6-26.7321 74.6231   2
  13  -9   6-33.7730 70.8565   2
  -9  13   6-57.6082 74.5147   3
 -13  -9  -8 971.932 129.075   4
  -9 -13  -8 1225.05 134.292   4
   9 -13   8 1314.31 143.771   2
 -13   9   8 1208.15 135.089   3
   9  13   8 1207.64 139.232   3
  13  -9   8 1243.97 132.784   2
  -9  13   8 1506.58 147.475   3
 -13  -9 -10 172.404 89.5648   4
  -9 -13 -10 76.3128 71.5232   4
   9 -13  10 92.3309 78.8039   2
  13  -9  10 73.7553 83.2828   2
   9  13  10 156.841 86.7470   3
  -9 -13 -12 667.784 111.845   4
  13  -9  12 860.914 125.664   2
   9  13  12 758.945 117.111   3
 -13 -10  -1 37.4319 72.0768   4
 -13  10   1-54.1556 52.3997   3
 -13  10  -1-77.0190 48.8969   3
 -10  13  -1 42.8478 49.1381   3
 -10  13   1-156.106 78.7642   3
 -13 -10  -3 3044.33 196.160   4
 -10 -13  -3 2727.44 183.367   4
  10 -13   3 3006.80 193.636   2
 -10  13  -3 2889.50 138.272   3
 -10  13   3 2869.30 171.145   3
 -13  10   3 2681.36 159.766   3
  10 -13   5 1682.86 159.308   2
 -13 -10  -5 1589.38 157.347   4
 -10 -13  -5 1537.78 142.954   4
  13 -10   5 1649.72 144.542   2
 -13  10   5 1229.34 123.654   3
 -10  13   5 1530.70 139.152   3
 -10  13   7 8.98796 74.0615   3
 -13 -10  -7-46.4856 74.3135   4
 -10 -13  -7 60.2859 77.3753   4
 -13  10   7 10.9884 70.7044   3
  10 -13   7 63.9492 81.8164   2
  13 -10   7 18.8725 73.4109   2
 -13 -10  -9 214.569 96.2439   4
 -10 -13  -9 59.1709 79.6757   4
 -13  10   9 127.468 86.9024   3
  10 -13   9 252.558 94.1235   2
  13 -10   9 180.720 87.7432   2
  10  13   9 183.816 79.8624   3
 -10 -13 -11 1290.11 144.356   4
  13 -10  11 1415.32 147.269   2
  10  13  11 1158.01 136.037   3
 -11  13   0 362.023 74.7503   3
 -13  11   0 327.956 66.2813   3
 -13 -11   0 437.997 101.834   4
 -11  13   2 931.009 106.739   3
 -13 -11  -2 1176.40 140.580   4
 -11 -13  -2 1128.44 133.766   4
 -11  13  -2 1213.94 99.0739   3
 -13  11   2 1254.80 115.479   3
 -13 -11  -4 3975.86 231.665   4
 -11 -13  -4 4010.82 225.248   4
  11 -13   4 4193.90 233.253   2
 -11  13   4 4075.28 208.679   3
 -13  11   4 3763.38 198.963   3
 -11  13   6 641.072 106.511   3
 -13 -11  -6 704.085 122.433   4
 -11 -13  -6 638.056 112.842   4
 -13  11   6 800.621 113.063   3
  11 -13   6 708.508 117.767   2
  13 -11   6 934.262 126.950   2
 -11  13   8 218.307 92.8682   3
 -13 -11  -8 165.305 88.1689   4
 -11 -13  -8-8.76446 83.4505   4
 -13  11   8 73.4034 82.7832   3
  11 -13   8 163.250 84.8549   2
  13 -11   8-48.1713 89.4005   2
 -11 -13 -10 1566.47 160.279   4
  13 -11  10 1659.02 162.582   2
  11  13  10 1583.06 154.048   3
 -12  13   1 793.666 100.539   3
 -12  13  -1 877.165 93.5269   3
 -13  12   1 933.039 102.907   3
 -13  12  -1 817.454 87.6156   3
 -13 -12  -1 850.279 123.705   4
 -12 -13  -1 826.420 125.188   4
 -13 -12  -3 2997.04 203.540   4
 -12 -13  -3 2640.98 195.492   4
 -12  13   3 2730.79 175.020   3
 -13  12   3 2854.88 174.403   3
 -13 -12  -5 2398.79 193.807   4
 -12 -13  -5 2451.78 191.197   4
  12 -13   5 2500.00 190.593   2
 -12  13   5 2428.21 174.528   3
 -13  12   5 2246.97 164.962   3
 -12  13   7 226.928 87.3402   3
 -13 -12  -7 408.257 110.650   4
 -12 -13  -7 173.873 87.2995   4
 -13  12   7 310.312 88.4650   3
  12 -13   7 309.307 99.3120   2
  13 -12   7 343.522 100.699   2
  12  13   9 817.476 122.042   3
 -13  13   0 149.502 57.2081   3
 -13 -13   0 237.997 99.9566   4
 -13  13   2 470.244 87.6480   3
 -13 -13  -2 374.269 101.024   4
 -13  13   4 1473.38 138.159   3
 -13 -13  -4 1618.98 165.621   4
 -13  13   6 624.739 111.889   3
 -14   0   0 68333.0 882.283   4
   0 -14   0 69836.5 924.860   2
 -14   0  -2 1571.46 124.340   4
 -14   0   2 1614.08 117.979   4
   0  14   2 1542.12 126.942   3
  14   0   2 1450.69 97.9054   3
 -14   0   2 1450.81 87.8931   2
   0 -14   2 1567.67 130.653   2
 -14   0   4 12243.2 309.054   4
 -14   0   4 11867.5 273.952   2
   0 -14  -4 11805.4 244.686   4
   0  14   4 12296.9 348.927   3
  14   0   4 12297.8 212.827   1
   0 -14   4 12262.2 345.536   2
  14   0   4 11321.3 241.593   3
 -14   0  -4 12172.3 336.014   4
   0 -14  -6 9710.15 204.210   4
 -14   0   6 10456.0 287.595   4
   0  14   6 10468.0 334.054   3
  14   0   6 11029.4 233.749   1
   0 -14   6 10498.4 323.465   2
 -14   0  -6 10146.9 323.467   4
   0  14   8 36786.8 675.410   3
 -14   0   8 36649.8 652.610   3
  14   0   8 36992.4 535.691   1
 -14   0  -8 35317.8 665.294   4
  14   0  10 96.7375 56.0022   1
   0  14  10 88.3784 75.6347   3
 -14   0  10 124.219 123.718   3
 -14   0 -10 237.405 87.2646   4
   0  14  12 3955.37 231.853   3
  14   0  12 3973.72 195.622   1
  14   0  14 7654.34 290.374   1
  -1 -14   1 21369.8 449.340   2
 -14   1   1 20763.1 411.872   4
 -14  -1  -1 20919.9 436.514   4
   1 -14   1 21279.4 458.513   2
 -14  -1   1 20599.0 429.189   4
  -1  14   1 20634.8 440.704   3
  14   1   1 20435.8 214.385   1
 -14  -1   1 19784.6 298.905   2
 -14   1   1 19264.3 336.318   2
 -14   1  -1 20405.4 416.574   4
 -14  -1   3 4358.27 147.962   2
 -14   1   3 4581.96 185.634   4
 -14  -1   3 4580.94 191.756   4
  14   1   3 4660.86 119.360   1
   1  14   3 4626.08 211.688   3
  -1  14   3 4780.85 213.958   3
  14  -1   3 4442.27 149.007   3
  -1 -14   3 4404.21 205.038   2
   1 -14   3 4449.70 211.245   2
 -14   1  -3 4400.21 198.100   4
  14   1   3 4252.80 155.225   3
 -14   1   3 4241.36 162.641   2
 -14  -1  -3 4469.56 205.410   4
 -14   1  -5 711.487 101.219   4
 -14  -1  -5 675.103 98.1829   4
   1 -14  -5 638.056 52.7363   4
  -1 -14  -5 826.740 70.1323   4
  -1 -14   5 595.168 92.3650   2
  14   1   5 568.462 54.6696   1
 -14   1   5 803.610 90.0538   4
   1 -14   5 623.280 100.509   2
 -14  -1   5 574.745 83.1444   4
   1  14   5 633.956 97.5959   3
  -1  14   5 580.269 95.8804   3
 -14   1   5 651.813 90.7919   3
 -14   1   7 21274.7 411.315   4
  14   1   7 20957.9 367.390   1
   1  14   7 21291.5 491.814   3
  -1  14   7 21391.5 491.251   3
 -14   1   7 21088.7 462.912   3
 -14   1  -7 20467.0 475.575   4
 -14  -1  -7 21164.2 484.721   4
  14  -1   9 6654.09 214.296   1
  14   1   9 6393.22 215.150   1
   1  14   9 6564.29 278.679   3
  -1  14   9 6555.62 276.996   3
 -14   1   9 6187.30 261.121   3
 -14   1  -9 6410.08 273.834   4
 -14  -1  -9 6648.31 280.956   4
   1  14  11 3402.56 209.514   3
 -14   1  11 3414.66 205.108   3
  14   1  11 3461.63 176.682   1
  -1  14  11 3421.09 216.161   3
 -14  -1 -11 3502.21 221.432   4
  14   1  13 102.427 70.6519   1
 -14  -2   0 1671.10 131.511   4
  -2 -14   0 1531.44 123.176   2
   2 -14   0 1443.52 132.267   2
  -2  14   0 1446.16 121.982   3
  14   2   0 1594.13 50.5243   1
 -14   2   0 1728.50 121.206   4
 -14   2  -2 180.058 67.3172   4
 -14   2   2 228.186 59.5500   4
 -14  -2  -2 191.019 69.8280   4
 -14  -2   2 189.197 63.9877   4
 -14   2   2 113.572 46.2533   2
  14   2   2 156.437 31.0476   1
  -2 -14   2 151.226 72.1196   2
  -2  14  -2 153.588 59.6796   3
   2 -14   2 68.0988 68.9274   2
  -2  14   2 126.385 65.9426   3
 -14   2   2 199.073 62.8878   3
  14  -2   2 185.964 47.9775   3
 -14   2  -4 64.9833 65.1181   4
 -14  -2  -4 25.5883 65.7629   4
 -14   2   4 45.1148 53.7935   4
  -2 -14   4-82.8225 73.2682   2
   2 -14  -4 52.4078 29.0961   4
 -14  -2   4-1.49795 66.6579   4
  -2 -14  -4 74.7894 48.9964   4
   2 -14   4 6.48032 73.3069   2
  14   2   4 46.4057 31.6798   1
  -2  14   4-26.7653 64.8949   3
 -14   2   4 4.95698 57.5763   3
 -14  -2  -6 313.938 85.4135   4
  -2 -14  -6 248.026 51.3881   4
   2 -14   6 251.096 81.4416   2
 -14   2   6 251.944 60.5256   4
   2  14   6 261.325 87.1766   3
  -2  14   6 186.160 77.9361   3
 -14   2   6 394.553 84.3315   3
  14   2   6 270.501 49.9950   1
 -14   2  -6 283.303 84.2128   4
 -14  -2  -8 742.870 116.975   4
 -14   2   8 998.871 97.8238   4
   2  14   8 673.112 108.411   3
 -14   2   8 792.223 112.915   3
  -2  14   8 675.898 110.456   3
 -14   2  -8 662.458 108.298   4
  14   2   8 706.355 80.6084   1
  14   2  10 43.7232 53.1618   1
   2  14  10 102.422 78.9905   3
 -14   2  10 148.884 78.5084   3
  -2  14  10-7.86614 82.0984   3
 -14  -2 -10 97.5274 79.6062   4
  14   2  12 51.2258 68.7900   1
   2  14  12-19.2984 72.4909   3
  14   2  14 99.2743 78.4914   1
  -3 -14   1 3568.62 176.300   2
 -14  -3  -1 3595.49 185.927   4
   3 -14   1 3846.23 200.511   2
 -14  -3   1 3612.16 183.748   4
  -3  14  -1 3706.55 177.408   3
  -3  14   1 3746.76 181.289   3
 -14   3   1 3878.60 162.437   3
  14  -3   1 3550.03 146.587   3
 -14   3  -1 3828.86 172.393   4
 -14   3   1 3548.08 159.567   4
 -14   3   3 3529.11 154.500   4
 -14  -3  -3 2882.79 172.445   4
 -14  -3   3 3183.95 170.843   4
  -3  14  -3 3301.20 161.195   3
  -3  14   3 3446.48 181.143   3
 -14   3   3 3325.98 161.558   3
  -3 -14   3 3556.67 179.257   2
 -14   3  -3 3272.70 170.444   4
   3 -14   3 3490.90 193.886   2
 -14   3   5 917.698 84.4137   4
 -14  -3  -5 871.273 116.393   4
  -3 -14   5 872.145 106.337   2
  -3 -14  -5 856.013 85.6553   4
   3 -14   5 766.041 108.346   2
   3  14   5 768.097 107.549   3
 -14   3   5 1054.88 111.684   3
  -3  14   5 909.808 112.624   3
  14   3   5 876.625 72.1142   1
 -14   3  -5 857.607 103.593   4
  -3 -14  -7 4112.46 161.965   4
 -14   3   7 4260.23 162.669   4
  14  -3   7 4335.40 165.034   2
   3  14   7 4365.83 220.369   3
 -14   3   7 4632.28 215.509   3
  -3  14   7 4060.65 214.704   3
   3 -14   7 4331.09 219.477   2
  14   3   7 4102.80 163.868   1
 -14   3  -7 3878.12 205.946   4
 -14  -3  -7 4247.16 221.966   4
 -14  -3  -9 602.055 108.933   4
   3  14   9 648.229 107.794   3
 -14   3   9 636.875 107.356   3
  14   3   9 583.843 80.7557   1
  -3  14   9 728.602 109.630   3
  14   3  11 2085.37 142.180   1
 -14   3  11 2286.76 173.764   3
   3  14  11 2433.08 181.186   3
  -3  14  11 2281.94 177.663   3
 -14  -3 -11 1972.42 175.341   4
  14   3  13 88.7121 79.6645   1
 -14  -4   0 13193.3 356.721   4
  -4 -14   0 14039.2 337.419   2
  -4  14   0 13686.4 346.277   3
 -14   4   0 13792.3 305.194   3
 -14   4   0 14003.4 320.458   4
 -14   4  -2-55.3782 61.1945   4
 -14   4   2-6.11935 49.6119   4
 -14  -4  -2 14.9504 67.4183   4
 -14  -4   2 90.1645 67.1236   4
  -4 -14   2 106.901 59.9075   2
   4 -14   2 132.413 80.6495   2
  -4  14  -2 69.9691 53.6369   3
  -4  14   2-39.9543 65.9897   3
 -14   4   2 49.2599 50.4465   3
  14  -4   2 80.3305 45.2325   3
 -14   4   4 6047.95 191.373   4
 -14  -4  -4 5835.37 249.011   4
  -4 -14  -4 5730.07 209.386   4
 -14   4   4 5917.46 226.934   3
  -4  14  -4 5981.17 211.817   3
  -4  14   4 5968.13 242.995   3
  -4 -14   4 5996.23 231.308   2
 -14   4  -4 5757.02 226.407   4
   4 -14   4 6141.09 259.785   2
 -14   4   6 2115.75 111.747   4
  -4 -14  -6 2062.14 127.872   4
 -14   4   6 1987.12 146.541   3
   4  14   6 1815.72 151.659   3
  -4  14  -6 2053.99 123.449   3
  -4  14   6 1805.97 147.294   3
   4 -14   6 1820.24 151.661   2
 -14  -4  -6 1902.08 154.008   4
  -4 -14  -8 7288.64 227.060   4
  14  -4   8 7899.63 239.585   2
 -14   4   8 7488.66 285.157   3
  -4  14  -8 8264.64 234.794   3
   4  14   8 7306.95 295.140   3
  -4  14   8 8026.60 303.772   3
  14   4   8 7629.26 237.875   1
   4 -14   8 7956.75 303.564   2
 -14  -4  -8 7737.44 304.959   4
 -14  -4 -10 375.645 99.9391   4
  14   4  10 563.364 85.5031   1
   4  14  10 426.132 94.6966   3
 -14   4  10 644.263 113.661   3
  -4  14  10 522.664 101.481   3
  14   4  12 1659.76 139.995   1
   4  14  12 1500.37 151.677   3
 -14   5   1 892.440 86.2240   4
 -14  -5  -1 721.644 102.407   4
 -14  -5   1 667.684 100.414   4
  -5 -14   1 776.636 90.5496   2
   5 -14   1 688.301 109.054   2
  -5  14  -1 748.944 90.2658   3
 -14   5   1 714.398 81.4051   3
  -5  14   1 813.769 98.6345   3
 -14   5  -1 770.731 74.2265   3
 -14   5  -1 591.275 78.2495   4
 -14   5   3 552.799 66.8946   4
 -14  -5  -3 435.554 91.7592   4
 -14  -5   3 558.600 97.8931   4
  -5 -14   3 427.878 80.9886   2
   5 -14   3 492.733 100.993   2
  -5  14  -3 542.711 79.6683   3
 -14   5   3 478.409 83.1523   3
  -5  14   3 501.885 87.5997   3
 -14   5  -3 443.952 80.0724   4
 -14   5   5 55.8014 42.1364   4
 -14  -5  -5 33.4274 73.0175   4
  -5 -14  -5 79.0153 60.5679   4
   5 -14   5 73.5050 76.3981   2
  -5  14  -5 14.3996 45.0354   3
 -14   5   5 50.1873 63.4855   3
  -5  14   5 40.5158 68.0911   3
 -14  -5  -7 714.782 112.332   4
  -5 -14  -7 832.795 92.3215   4
   5 -14   7 866.721 123.703   2
   5  14   7 850.092 116.711   3
  -5  14  -7 642.324 75.2388   3
  14  -5   7 702.761 85.5902   2
 -14   5   7 635.201 96.2314   3
  -5  14   7 735.080 111.362   3
 -14  -5  -9 50.5935 78.9233   4
  -5 -14  -9-84.5492 65.5748   4
   5 -14   9 29.1596 75.0668   2
  14   5   9 42.2080 55.8758   1
  14  -5   9-50.0464 66.7554   2
   5  14   9-124.981 87.7793   3
 -14   5   9-29.2422 75.7222   3
  -5  14   9 66.4704 76.8686   3
  14   5  11 97.8461 67.3712   1
   5  14  11-15.0229 83.6560   3
  14   5  13-51.2153 76.3952   1
 -14  -6   0 10542.2 331.177   4
  -6 -14   0 10376.4 278.051   2
 -14   6   0 10411.3 267.267   3
  -6  14   0 10635.0 301.014   3
 -14   6   0 10453.1 272.003   4
 -14  -6  -2 287.575 83.1461   4
 -14  -6   2 354.932 87.8849   4
  -6 -14   2 317.175 66.1341   2
   6 -14   2 434.626 94.5227   2
 -14   6   2 309.943 68.4261   3
  -6  14  -2 342.505 69.7775   3
 -14   6  -2 408.039 57.0811   3
  -6  14   2 353.756 82.1530   3
 -14   6   2 379.513 61.9205   4
 -14  -6  -4 2129.18 162.111   4
  -6 -14  -4 2162.18 143.786   4
 -14   6   4 2061.26 141.764   3
  -6  14  -4 2459.88 135.300   3
  -6  14   4 2716.74 168.576   3
  -6 -14   4 2407.15 146.071   2
 -14   6   4 2457.93 115.397   4
   6 -14   4 2450.93 176.803   2
 -14  -6  -6 531.317 100.609   4
  -6 -14  -6 668.927 96.8116   4
   6 -14   6 815.413 111.972   2
 -14   6   6 820.475 106.529   3
  14  -6   6 660.088 87.0099   2
  -6  14  -6 687.342 78.4945   3
  -6  14   6 765.356 107.690   3
  -6 -14  -8 8147.36 266.108   4
  14  -6   8 7106.05 251.677   2
 -14   6   8 7255.51 286.116   3
   6  14   8 7535.91 296.803   3
  -6  14   8 7373.07 295.776   3
   6 -14   8 8099.38 315.759   2
 -14  -6  -8 7445.93 309.197   4
 -14  -6 -10-124.725 93.1812   4
  14   6  10 14.3269 64.2396   1
   6 -14  10-224.013 106.161   2
  14  -6  10-23.4471 73.5226   2
   6  14  10-162.455 88.2831   3
 -14   6  10 26.7860 73.9126   3
  -6  14  10 48.5273 76.3917   3
  14   6  12 1218.02 131.098   1
   6  14  12 1079.78 133.668   3
  -7 -14   1 20729.2 402.360   2
 -14  -7  -1 20987.0 490.372   4
 -14   7   1 20560.0 408.153   3
 -14  -7   1 21394.8 486.531   4
 -14   7  -1 20994.1 383.176   3
  -7  14  -1 21143.4 426.422   3
  -7  14   1 20381.5 439.167   3
   7 -14   3 4697.10 235.311   2
 -14  -7  -3 4496.43 229.510   4
 -14   7   3 4155.03 189.394   3
  -7 -14  -3 4497.47 210.971   4
 -14   7  -3 4571.26 149.821   3
  -7  14  -3 5069.22 194.294   3
  -7  14   3 4754.86 215.851   3
  -7 -14   3 4762.77 193.991   2
 -14   7   3 4777.19 158.150   4
 -14   7   5 1401.44 127.839   3
  -7 -14  -5 1357.31 126.520   4
 -14  -7  -5 1203.56 131.934   4
   7 -14   5 1195.58 135.412   2
  -7  14  -5 1273.32 99.1044   3
  -7  14   5 1370.70 131.996   3
  -7 -14  -7 22043.1 479.991   4
  14  -7   7 23251.1 483.850   2
 -14   7   7 22850.2 514.937   3
   7  14   7 24075.1 543.408   3
  -7  14   7 22718.0 523.778   3
   7 -14   7 24111.8 556.493   2
 -14  -7  -7 24938.2 570.309   4
 -14   7   9 6812.65 288.125   3
   7  14   9 6939.88 287.966   3
  -7  14   9 7259.27 301.741   3
   7 -14   9 6996.32 303.831   2
 -14  -7  -9 6679.20 301.269   4
  -7 -14  -9 6831.81 260.170   4
  14  -7   9 7003.24 265.767   2
   7  14  11 5077.74 254.866   3
  14   7  11 4703.87 224.946   1
  14  -7  11 4891.67 228.469   2
 -14   8   0 33408.4 529.384   3
 -14  -8   0 34430.6 647.078   4
  -8  14   0 33072.3 565.851   3
 -14   8   2 1353.76 114.715   3
 -14  -8  -2 1401.64 140.575   4
 -14   8  -2 1428.75 94.6307   3
  -8  14  -2 1242.68 105.384   3
  -8  14   2 1404.28 122.613   3
  -8 -14   2 1416.64 105.527   2
   8 -14   4 7336.88 296.493   2
 -14  -8  -4 6805.83 289.486   4
 -14   8   4 6083.28 241.154   3
  -8 -14  -4 6107.46 254.905   4
  -8  14  -4 6541.69 213.903   3
  -8  14   4 6896.88 262.028   3
  -8 -14   4 6574.15 229.902   2
 -14  -8  -6 5638.18 270.675   4
 -14   8   6 5239.15 238.414   3
  -8 -14  -6 5008.34 232.868   4
  14  -8   6 5380.36 231.497   2
  -8  14   6 5818.90 256.735   3
   8 -14   6 5216.79 260.853   2
  -8 -14  -8 19892.9 469.807   4
  14  -8   8 20965.0 477.018   2
 -14   8   8 20975.0 508.707   3
   8  14   8 21050.9 513.756   3
  -8  14   8 21729.0 520.861   3
   8 -14   8 22376.3 541.327   2
 -14  -8  -8 21484.2 548.962   4
  -8 -14 -10 22.4738 76.1383   4
  14  -8  10 21.2203 74.9450   2
   8  14  10 28.1125 84.1805   3
 -14   9   1 4575.26 192.520   3
 -14   9  -1 4720.55 178.541   3
 -14  -9  -1 4875.43 242.616   4
 -14  -9   1 5051.34 250.358   4
  -9  14  -1 4766.46 197.081   3
  -9  14   1 4777.17 208.182   3
 -14  -9  -3 341.129 96.1020   4
  -9 -14  -3 393.549 96.5634   4
 -14   9   3 203.920 66.5157   3
   9 -14   3 353.179 99.8735   2
  -9  14  -3 383.326 64.4699   3
  -9  14   3 430.918 92.2444   3
  -9 -14   5-1.62712 53.9028   2
 -14  -9  -5-5.07311 77.9235   4
  -9 -14  -5-42.5458 77.1651   4
 -14   9   5-61.4706 72.2995   3
   9 -14   5 84.0344 85.9232   2
  -9  14   5 44.7511 70.8714   3
 -14  -9  -7 5787.58 284.655   4
  -9 -14  -7 5161.70 246.363   4
 -14   9   7 5522.29 255.873   3
  14  -9   7 5653.52 250.584   2
  -9  14   7 6252.63 275.093   3
   9 -14   7 5899.22 283.367   2
  -9 -14  -9 1385.97 141.945   4
   9  14   9 1685.07 159.376   3
  14  -9   9 1452.75 144.721   2
  14  -9  11 236.199 91.0100   2
 -14 -10   0 486.001 100.368   4
 -14  10   0 458.442 72.4672   3
 -10  14   0 420.602 80.4573   3
 -14 -10  -2 57.4215 77.5787   4
 -10 -14  -2 12.2878 73.3585   4
 -14  10   2 19.5490 58.8679   3
 -10  14  -2 42.3920 48.6940   3
 -10  14   2-113.875 81.3935   3
 -14 -10  -4 1130.66 141.630   4
 -10 -14  -4 1120.18 130.185   4
 -14  10   4 1148.25 117.994   3
  10 -14   4 1277.60 145.552   2
 -10  14   4 1128.68 121.393   3
 -14 -10  -6-2.87542 78.6828   4
 -10 -14  -6-18.3952 78.8319   4
 -14  10   6 20.2886 75.0511   3
  10 -14   6-48.4520 79.9879   2
  14 -10   6 81.5356 76.4188   2
 -10  14   6-4.72286 69.1308   3
 -10 -14  -8 450.169 104.810   4
 -14  10   8 225.969 86.5849   3
  10  14   8 419.827 106.375   3
  14 -10   8 288.425 96.5910   2
 -10 -14 -10 149.001 84.1608   4
  14 -10  10 18.5966 79.8393   2
 -14  11   1 2814.73 159.257   3
 -14 -11  -1 3022.98 203.344   4
 -14 -11   1 2783.99 197.893   4
 -11 -14  -1 2910.05 194.917   4
 -11  14  -1 2672.61 151.931   3
 -11  14   1 2831.11 167.953   3
 -14  11   3 1747.67 141.105   3
 -14 -11  -3 1789.74 168.124   4
 -11 -14  -3 1835.97 167.878   4
 -11  14   3 1754.40 142.183   3
 -11  14   5 808.147 114.254   3
 -14 -11  -5 518.743 108.828   4
 -11 -14  -5 529.786 111.437   4
 -14  11   5 705.554 110.140   3
  11 -14   5 820.331 133.668   2
 -14  11   7 3454.24 211.794   3
 -11 -14  -7 3624.53 223.687   4
  14 -11   7 4008.17 228.207   2
 -11 -14  -9 546.334 112.852   4
  14 -11   9 426.606 105.228   2
 -14 -12   0 2370.62 188.554   4
 -12  14   0 2644.74 158.941   3
 -12  14   2 251.937 79.1667   3
 -12 -14  -2 166.658 92.4951   4
 -14  12   2 110.341 69.7265   3
 -12  14   4 1117.38 128.095   3
 -12 -14  -4 1008.24 142.542   4
 -14  12   4 882.517 113.199   3
 -12 -14  -6 620.787 127.973   4
 -14  12   6 434.989 95.0967   3
 -13  14   1 211.391 75.2209   3
 -13  14   3 222.171 79.9226   3
 -14  13   3 343.380 88.5307   3
 -13  14   5 265.186 89.3608   3
 -14  13   5 286.424 90.9793   3
 -14  14   4 2770.85 190.230   3
 -15   0  -1 44351.9 689.711   4
 -15   0   1 44036.7 678.128   4
   0 -15   1 45630.8 733.113   2
   0  15   1 45457.1 708.699   3
 -15   0   3 7392.66 252.198   4
   0  15   3 7867.65 280.304   3
   0 -15   3 7658.91 282.441   2
 -15   0  -3 7621.01 272.072   4
 -15   0   5 1744.18 129.200   4
   0  15   5 1878.29 151.034   3
   0 -15   5 2089.59 159.946   2
 -15   0  -5 1678.83 146.450   4
 -15   0   7 53036.8 757.016   4
   0  15   7 53393.8 856.860   3
   0 -15   7 53960.2 848.112   2
 -15   0  -7 51319.4 833.317   4
   0  15   9 12681.6 396.257   3
 -15   0  -9 13049.8 404.072   4
  15   0   9 12843.7 306.850   1
 -15   1   0 42776.0 659.786   4
 -15  -1   0 41586.6 672.943   4
  -1 -15   0 43438.4 698.988   2
   1 -15   0 43466.9 718.423   2
  -1  15   0 43136.1 687.093   3
  -1 -15   2 1491.47 134.292   2
 -15  -1  -2 1861.20 140.866   4
   1 -15   2 1864.19 150.370   2
 -15   1   2 1726.55 126.045   4
 -15  -1   2 1689.07 131.273   4
   1  15   2 1882.53 146.734   3
  -1  15   2 1640.22 137.006   3
 -15   1  -2 1928.21 140.366   4
 -15   1   4 7057.67 239.525   4
 -15  -1   4 7380.45 255.002   4
  -1 -15  -4 7369.70 207.452   4
   1  15   4 7259.04 280.797   3
  -1  15   4 7514.21 279.923   3
  -1 -15   4 7111.97 272.554   2
   1 -15   4 7229.88 277.497   2
 -15   1  -4 7126.03 267.734   4
 -15  -1  -4 7142.71 270.427   4
 -15   1   6 7578.53 247.085   4
 -15  -1   6 7440.79 262.573   4
   1  15   6 7876.94 297.297   3
  -1  15   6 8016.55 298.329   3
  15   1   6 7812.38 201.450   1
 -15   1   6 8015.12 280.241   3
  -1 -15   6 7892.14 289.897   2
   1 -15   6 7987.36 299.123   2
 -15   1  -6 7404.73 282.818   4
 -15  -1  -6 7554.88 290.080   4
 -15   1   8 27481.3 496.224   4
   1  15   8 28572.8 597.428   3
  -1  15   8 27298.2 586.384   3
  15   1   8 27523.2 456.240   1
 -15   1   8 27322.3 566.495   3
 -15   1  -8 25913.5 577.550   4
 -15  -1  -8 27426.3 596.292   4
  15   1  10 70.6228 55.5107   1
   1  15  10 38.8064 80.1920   3
 -15   1  10 10.6506 73.3838   3
  -1  15  10 46.2956 76.0354   3
 -15  -1 -10 172.994 89.1519   4
 -15   2   1 1376.23 114.573   4
 -15  -2  -1 1428.69 131.151   4
  -2 -15   1 1507.33 130.925   2
 -15  -2   1 1372.77 124.403   4
  -2  15  -1 1388.18 123.332   3
  -2  15   1 1325.65 120.669   3
   2 -15   1 1278.79 133.554   2
 -15   2  -1 1393.25 119.795   4
 -15   2  -3 387.167 79.8559   4
 -15  -2  -3 513.792 93.4911   4
 -15   2   3 278.432 66.5754   4
 -15  -2   3 473.248 85.1261   4
  -2 -15   3 363.345 84.1086   2
  -2  15  -3 449.649 79.4521   3
   2  15   3 468.254 94.0822   3
   2 -15   3 543.173 98.4012   2
  -2  15   3 535.520 95.5721   3
 -15   2   3 566.822 83.6161   3
 -15   2  -5 206.748 78.3458   4
 -15  -2  -5 85.0007 73.3259   4
 -15   2   5 123.476 55.4415   4
  -2 -15   5 148.360 70.7132   2
  -2 -15  -5 274.823 58.8282   4
 -15  -2   5 365.077 83.3472   4
   2 -15   5 169.607 81.9543   2
   2  15   5 20.7981 84.6012   3
  -2  15   5 286.006 84.9201   3
 -15   2   5 232.858 76.5599   3
  15   2   5 169.095 40.6656   1
 -15   2   7 1666.97 119.030   4
  15   2   7 1330.86 96.2405   1
  -2  15   7 1544.78 149.596   3
   2  15   7 1356.81 142.638   3
 -15   2   7 1373.49 132.482   3
   2 -15   7 1764.95 157.949   2
 -15  -2  -7 1638.94 153.826   4
 -15   2  -7 1352.23 138.080   4
 -15  -2  -9 810.904 121.266   4
  15   2   9 735.604 86.4513   1
   2  15   9 898.627 124.213   3
 -15   2   9 993.188 122.393   3
  -2  15   9 693.516 116.786   3
  15   2  11 195.143 72.4140   1
 -15  -3   0 7809.30 280.468   4
  -3 -15   0 7873.58 268.684   2
  -3  15   0 7635.26 266.269   3
 -15   3   0 8322.22 257.329   4
 -15   3  -2 196.291 67.0838   4
 -15   3   2 183.851 60.2495   4
 -15  -3  -2 173.237 73.3948   4
 -15  -3   2 154.405 69.3797   4
  -3 -15   2 188.001 71.8447   2
  -3  15  -2 118.080 61.1821   3
   3 -15   2 279.730 82.7140   2
  -3  15   2 170.147 73.7989   3
 -15   3   2 286.025 69.9709   3
 -15  -3  -4 11532.5 356.937   4
 -15   3   4 11642.0 290.585   4
 -15  -3   4 11834.5 339.600   4
  -3 -15  -4 11719.5 295.647   4
   3  15   4 11638.4 353.022   3
  -3  15  -4 11865.3 316.566   3
  -3  15   4 11475.2 346.919   3
 -15   3   4 11871.0 326.001   3
  15   3   4 12346.6 243.781   1
  -3 -15   4 12541.4 352.217   2
 -15   3  -4 11468.7 333.353   4
   3 -15   4 11826.1 368.217   2
 -15  -3  -6 460.511 96.8033   4
  -3 -15   6 760.156 103.029   2
 -15   3   6 619.092 76.8105   4
  -3 -15  -6 645.341 78.8509   4
   3 -15   6 660.417 120.760   2
  -3  15  -6 687.103 85.1058   3
   3  15   6 526.463 98.0596   3
  15   3   6 605.856 67.0901   1
 -15   3   6 650.246 104.377   3
  -3  15   6 657.655 110.042   3
 -15   3  -6 669.858 104.656   4
   3  15   8 4773.26 241.116   3
 -15   3   8 4610.60 229.727   3
  -3  15   8 4658.28 238.029   3
   3 -15   8 4695.49 258.976   2
 -15  -3  -8 4357.96 235.610   4
  15   3   8 4207.60 172.695   1
  15   3  10 2092.40 139.679   1
 -15   3  10 2334.05 180.802   3
   3  15  10 2107.80 173.291   3
  -3  15  10 2143.83 177.651   3
 -15  -3 -10 2114.54 179.279   4
  15   3  12 3173.72 183.533   1
  -4 -15   1 7053.28 252.960   2
 -15  -4  -1 7100.61 276.800   4
 -15  -4   1 7350.79 274.956   4
   4 -15   1 7548.01 296.666   2
  -4  15  -1 7595.71 257.145   3
  -4  15   1 7237.45 260.889   3
 -15   4   1 7427.46 236.110   3
 -15   4  -1 7427.16 247.524   4
 -15   4   1 7230.25 232.325   4
   4 -15   3 10498.9 347.150   2
 -15  -4  -3 10146.4 333.043   4
 -15  -4   3 10655.6 330.178   4
  -4  15  -3 9549.12 285.735   3
 -15   4   3 9796.09 289.984   3
  -4  15   3 10091.2 321.058   3
 -15   4  -3 9783.51 296.787   4
  -4 -15   3 10561.6 315.891   2
 -15   4   3 10060.6 266.231   4
 -15   4   5 2795.88 136.548   4
  -4 -15  -5 2760.03 149.292   4
   4  15   5 2890.71 181.137   3
  -4  15  -5 2604.43 147.362   3
 -15   4   5 2734.82 169.635   3
  -4  15   5 2742.24 176.758   3
  -4 -15   5 3175.93 183.641   2
 -15   4  -5 2779.46 171.472   4
   4 -15   5 2777.34 186.990   2
 -15  -4  -5 2790.55 186.475   4
  -4 -15  -7 9709.99 269.435   4
  -4  15  -7 10302.1 281.356   3
   4  15   7 10023.2 344.883   3
 -15   4   7 9320.32 319.839   3
  -4  15   7 9881.82 341.542   3
  15   4   7 9799.71 260.558   1
   4 -15   7 9953.97 351.271   2
 -15  -4  -7 9332.87 339.228   4
 -15  -4  -9 716.324 123.167   4
   4 -15   9 692.839 121.954   2
   4  15   9 620.520 108.175   3
  15   4   9 816.989 92.6265   1
 -15   4   9 663.539 106.543   3
  -4  15   9 775.421 118.958   3
  15   4  11 7948.89 276.896   1
 -15   5   0 633.673 81.0717   4
 -15  -5   0 532.367 98.6803   4
  -5  15   0 601.175 93.2838   3
 -15   5   0 537.419 72.6057   3
 -15   5   2 194.306 53.9963   4
 -15  -5  -2 24.0051 79.9664   4
 -15  -5   2 180.743 82.7529   4
  -5 -15   2 145.866 69.7522   2
   5 -15   2 76.2502 75.8727   2
  -5  15  -2 89.8410 60.1617   3
 -15   5   2 120.783 60.5904   3
  -5  15   2 182.985 77.7393   3
 -15   5  -2-12.7927 59.1740   4
 -15  -5  -4 1732.14 152.597   4
  -5 -15  -4 2042.29 138.671   4
 -15  -5   4 2429.27 167.175   4
 -15   5   4 1796.54 136.681   3
  -5  15  -4 1949.27 131.565   3
  -5  15   4 2129.20 155.325   3
  -5 -15   4 1927.75 142.418   2
 -15   5  -4 2005.31 143.310   4
 -15   5   4 1991.17 115.031   4
   5 -15   4 2157.56 173.981   2
 -15  -5  -6 28.0133 78.1341   4
  -5 -15  -6 14.5750 57.8517   4
   5 -15   6-5.28557 75.6236   2
   5  15   6-54.7165 85.9257   3
  -5  15  -6 0.61408 51.5609   3
 -15   5   6-37.4422 69.6924   3
  -5  15   6 25.7417 75.2607   3
 -15  -5  -8 472.432 103.571   4
  15   5   8 335.665 69.2077   1
   5 -15   8 328.634 101.170   2
   5  15   8 483.028 100.336   3
 -15   5   8 249.885 81.0233   3
  -5  15   8 352.480 92.4380   3
  15   5  10 850.752 105.140   1
   5  15  10 793.406 118.746   3
  15   5  12 346.171 83.8044   1
  -6 -15   1 8823.01 272.467   2
 -15  -6  -1 8745.77 312.421   4
 -15  -6   1 8751.17 312.981   4
 -15   6   1 8785.40 265.530   3
  -6  15  -1 8478.18 273.958   3
 -15   6  -1 9061.90 244.272   3
  -6  15   1 8516.55 288.169   3
 -15   6  -1 8552.69 260.361   4
 -15   6   1 8962.16 251.518   4
 -15  -6  -3 819.332 115.277   4
 -15  -6   3 1125.33 129.823   4
  -6 -15  -3 1025.89 112.315   4
   6 -15   3 1127.82 135.707   2
 -15   6   3 968.984 106.824   3
  -6  15  -3 989.522 100.372   3
  -6  15   3 1070.36 118.341   3
 -15   6   3 1004.94 86.1930   4
  -6 -15   3 1171.82 112.927   2
 -15  -6  -5 110.071 79.2760   4
  -6 -15   5 169.787 74.3277   2
  -6 -15  -5 78.7736 66.9345   4
   6 -15   5 159.058 87.8005   2
 -15   6   5 143.789 74.7877   3
  -6  15  -5 52.6535 51.5589   3
  -6  15   5 144.174 81.5921   3
  -6 -15  -7 9778.85 300.420   4
 -15   6   7 9745.68 332.761   3
   6  15   7 10175.1 350.141   3
  -6  15   7 10310.6 351.101   3
   6 -15   7 10709.8 372.637   2
 -15  -6  -7 10632.8 373.335   4
 -15   6   9 2268.38 174.583   3
   6  15   9 2522.39 186.872   3
  15   6   9 2418.08 153.600   1
  15   6  11 631.384 101.314   1
 -15  -7   0 51278.3 837.709   4
 -15   7   0 51999.8 709.181   3
  -7  15   0 51861.4 764.657   3
  -7 -15   2 1198.06 110.318   2
   7 -15   2 1545.99 156.491   2
 -15  -7  -2 1160.87 132.919   4
 -15   7   2 1447.63 121.437   3
 -15  -7   2 1323.94 141.513   4
  -7  15  -2 1153.26 110.728   3
  -7  15   2 1163.96 121.526   3
 -15   7   2 1243.03 97.3903   4
   7 -15   4 10540.2 370.484   2
 -15  -7  -4 10987.3 371.055   4
  -7 -15  -4 9578.26 314.848   4
 -15   7   4 10463.4 320.150   3
  -7  15  -4 11249.0 297.320   3
  -7  15   4 10710.6 343.379   3
  -7 -15   4 11207.9 319.636   2
 -15  -7  -6 8381.96 334.084   4
  -7 -15  -6 8198.87 292.417   4
 -15   7   6 8071.60 294.845   3
  -7  15   6 8282.62 311.393   3
   7 -15   6 9096.04 344.201   2
  -7 -15  -8 28500.9 558.643   4
  15  -7   8 30895.1 573.487   2
 -15   7   8 29893.1 616.767   3
   7  15   8 30597.0 645.834   3
  -7  15   8 29769.4 633.439   3
   7 -15   8 31018.0 660.536   2
 -15  -7  -8 30427.2 672.002   4
  15   7  10 144.456 78.2644   1
 -15  -8  -1 25495.5 567.119   4
 -15  -8   1 24350.6 551.342   4
 -15   8   1 24384.4 466.566   3
 -15   8  -1 25517.1 442.997   3
  -8  15  -1 24407.9 482.977   3
  -8  15   1 23879.0 497.108   3
 -15  -8  -3 3875.71 224.498   4
   8 -15   3 3991.06 232.016   2
 -15   8   3 3712.79 187.864   3
  -8 -15  -3 3485.19 197.686   4
  -8  15  -3 3723.13 174.632   3
  -8  15   3 3843.63 205.430   3
  -8 -15   3 3769.84 181.743   2
 -15  -8  -5 427.903 107.192   4
  -8 -15   5 321.615 77.3672   2
  -8 -15  -5 233.156 84.1984   4
   8 -15   5 280.262 99.8997   2
 -15   8   5 315.005 86.3128   3
  -8  15   5 318.330 85.1729   3
  -8 -15  -7 26209.5 557.931   4
 -15   8   7 26396.3 576.488   3
   8  15   7 29268.0 625.518   3
  -8  15   7 28263.1 606.601   3
   8 -15   7 29403.9 649.691   2
 -15  -8  -7 28149.0 646.366   4
  15  -8   9 6692.55 272.686   2
  -8 -15  -9 6537.62 268.577   4
  15   8  11 3066.78 196.787   1
 -15  -9   0 9993.36 354.519   4
 -15   9   0 9278.57 270.159   3
  -9  15   0 9531.37 297.886   3
 -15  -9  -2 815.030 123.089   4
 -15  -9   2 862.548 122.475   4
  -9 -15  -2 905.049 124.124   4
 -15   9   2 893.363 98.0523   3
  -9  15  -2 921.191 97.6104   3
  -9  15   2 843.827 105.496   3
 -15  -9  -4 305.428 101.952   4
  -9 -15  -4 168.922 87.2988   4
 -15   9   4 154.349 74.9756   3
   9 -15   4-42.0536 95.1179   2
  -9  15   4 152.533 80.2530   3
   9 -15   6 2593.80 198.552   2
  -9 -15  -6 2108.36 168.301   4
 -15   9   6 2456.86 173.652   3
  -9  15   6 2320.26 177.831   3
  -9 -15  -8 5309.59 254.422   4
  15  -9   8 5688.66 257.602   2
 -15 -10  -1 331.617 99.5588   4
 -15 -10   1 338.202 99.4136   4
 -15  10   1 56.6429 56.2117   3
 -10  15  -1 192.839 66.5502   3
 -10  15   1 264.803 82.1640   3
 -15  10   3 2986.38 175.648   3
 -15 -10  -3 3040.67 210.476   4
 -10 -15  -3 2990.69 197.714   4
 -10  15   3 2976.69 185.937   3
 -10 -15  -5 1155.28 138.759   4
 -15  10   5 1130.77 126.952   3
 -10  15   5 1568.09 144.882   3
 -10 -15  -7 287.276 91.1093   4
 -15  10   7 262.587 89.6688   3
 -10 -15  -9 44.4618 84.5902   4
  15 -10   9 50.8113 88.2072   2
 -11  15   0 7628.94 269.304   3
 -11 -15  -2 322.113 100.987   4
 -15  11   2 213.621 74.0002   3
 -11  15   2 187.534 77.3806   3
 -15  11   4 6929.36 273.851   3
 -11 -15  -4 6831.26 304.033   4
 -11  15   4 6572.00 277.329   3
 -11 -15  -6 604.176 116.251   4
 -15  11   6 684.561 116.413   3
  15 -11   8 3834.80 229.081   2
 -12  15   1 1356.04 130.275   3
 -15  12   3 2184.20 157.119   3
 -12  15   3 2123.51 163.603   3
 -15  12   5 193.792 82.4527   3
 -13  15   2 82.9335 73.9045   3
 -15  13   4 111.846 80.5681   3
 -16   0   0 39031.3 653.958   4
   0  16   0 39652.5 679.971   3
 -16   0   2 1536.75 130.593   4
   0  16   2 1516.39 139.518   3
   0 -16   2 1395.82 140.566   2
 -16   0  -2 1676.21 139.248   4
 -16   0   4 2304.06 151.478   4
   0  16   4 2536.07 178.630   3
   0 -16   4 2631.76 181.278   2
 -16   0  -4 2496.90 171.013   4
 -16   0   6 8165.57 274.503   4
   0  16   6 8178.73 315.931   3
   0 -16   6 8424.01 318.176   2
 -16   0  -6 7409.36 297.164   4
 -16   0   8 21751.1 462.894   4
   0  16   8 20457.5 523.028   3
   0 -16   8 21374.9 519.936   2
 -16   0  -8 20630.9 522.643   4
 -16   1   1 10356.2 308.267   4
 -16  -1  -1 11190.8 335.098   4
 -16  -1   1 10794.4 325.290   4
  -1 -16   1 11047.8 346.192   2
   1 -16   1 11055.6 354.360   2
   1  16   1 11446.2 344.265   3
  -1  16  -1 11214.9 328.574   3
  -1  16   1 11126.4 341.717   3
 -16   1  -1 10638.7 319.805   4
 -16   1  -3 388.251 85.0824   4
 -16  -1  -3 371.670 89.9898   4
 -16   1   3 212.704 67.7311   4
 -16  -1   3 354.821 84.8776   4
  -1 -16   3 275.857 87.8972   2
   1 -16   3 279.296 95.3493   2
   1  16   3 370.969 98.5338   3
  -1  16   3 402.401 93.6689   3
 -16   1  -5-13.9160 72.7165   4
 -16  -1  -5 138.298 78.2465   4
 -16   1   5 29.1246 60.1472   4
 -16  -1   5 109.889 69.6800   4
  -1 -16   5-1.02266 79.9937   2
   1 -16   5-76.1856 85.8421   2
   1  16   5 73.1922 77.5793   3
  -1  16   5 88.4025 76.7599   3
 -16   1   7 11538.2 318.818   4
 -16  -1   7 12121.1 348.972   4
   1  16   7 12158.6 391.947   3
  -1  16   7 12195.2 389.720   3
  -1 -16   7 11661.3 379.558   2
   1 -16   7 12339.0 392.120   2
 -16   1  -7 11544.9 372.456   4
 -16  -1  -7 11382.4 375.215   4
 -16  -1   9 4030.74 206.254   4
   1  16   9 3615.42 226.537   3
 -16   1   9 3621.92 216.606   3
   1 -16   9 3613.44 221.983   2
 -16   1  -9 3884.44 230.741   4
 -16  -2   0 2858.80 178.050   4
  -2  16   0 2753.81 168.095   3
 -16   2   0 2950.73 165.299   4
 -16   2  -2 209.050 77.1617   4
 -16   2   2 304.208 72.0109   4
 -16  -2  -2 168.682 73.2929   4
 -16  -2   2 173.280 72.4765   4
  -2  16  -2 250.859 75.0175   3
  -2 -16   2 273.684 84.4757   2
   2 -16   2 255.257 94.2761   2
  -2  16   2 82.7055 69.1603   3
 -16   2  -4-33.8948 68.2569   4
 -16  -2  -4-40.3359 88.6800   4
 -16   2   4-80.3589 72.9570   4
 -16  -2   4-35.2163 64.5474   4
  -2 -16  -4 20.0450 47.8881   4
  -2 -16   4 22.8724 76.5961   2
   2 -16   4 107.395 82.6676   2
  -2  16  -4-20.2485 64.0634   3
   2  16   4 17.2447 72.7532   3
  -2  16   4 55.0993 73.4628   3
 -16  -2  -6 343.664 94.6897   4
 -16   2   6 420.646 73.2684   4
  -2 -16   6 487.106 105.200   2
 -16  -2   6 765.845 111.616   4
   2 -16   6 513.936 107.751   2
   2  16   6 471.359 97.1172   3
  -2  16   6 688.229 108.949   3
 -16   2   6 482.848 99.2134   3
 -16   2  -6 551.948 104.188   4
   2 -16   8 1539.64 155.385   2
 -16  -2   8 1682.57 150.137   4
   2  16   8 1552.97 157.712   3
  -2  16   8 1594.05 151.473   3
 -16   2   8 1320.67 136.008   3
 -16  -2  -8 1521.41 158.837   4
 -16   2  -8 1475.49 150.490   4
 -16   3  -1 503.745 83.8013   4
 -16   3   1 430.131 76.3835   4
 -16  -3  -1 596.478 105.718   4
 -16  -3   1 524.782 99.2670   4
  -3  16  -1 571.849 91.4866   3
  -3 -16   1 478.876 91.2958   2
  -3  16   1 595.249 98.7006   3
   3 -16   1 507.654 106.043   2
 -16  -3  -3 1759.81 149.892   4
   3 -16   3 1708.21 157.772   2
 -16  -3   3 1656.24 142.442   4
  -3  16  -3 1670.12 132.143   3
  -3  16   3 1753.30 147.521   3
 -16   3   3 1790.56 133.892   3
 -16   3  -3 1655.70 137.161   4
  -3 -16   3 1840.36 147.270   2
 -16   3   3 1763.27 125.670   4
 -16  -3  -5 74.2051 82.8602   4
 -16   3   5 95.2278 53.1625   4
  -3 -16  -5 227.285 60.5142   4
 -16  -3   5 277.255 83.7145   4
  -3 -16   5 202.849 82.8541   2
   3 -16   5 242.435 94.8684   2
  -3  16  -5 246.964 66.1376   3
   3  16   5 172.396 79.2162   3
  -3  16   5 245.654 86.8862   3
 -16   3   5 283.429 81.8102   3
 -16   3  -5 97.1179 122.694   4
 -16  -3  -7 751.221 123.649   4
  -3 -16   7 941.585 122.446   2
 -16  -3   7 1112.81 133.353   4
   3 -16   7 932.365 129.277   2
  -3  16  -7 1055.11 104.446   3
   3  16   7 774.356 121.136   3
 -16   3   7 727.647 108.647   3
  -3  16   7 967.259 123.273   3
 -16   3  -7 854.388 125.455   4
 -16   3   9 39.3156 76.2908   3
 -16  -4   0 2083.18 161.723   4
  -4  16   0 1991.63 146.102   3
 -16   4   0 2239.48 144.216   4
 -16   4  -2-31.0066 64.2097   4
 -16   4   2-79.1096 63.8479   4
 -16  -4  -2-43.9566 79.1482   4
 -16  -4   2-9.42431 69.4704   4
  -4 -16   2 10.4804 64.3897   2
  -4  16  -2 10.0621 62.3018   3
   4 -16   2 25.8504 76.5250   2
  -4  16   2 47.4197 67.0368   3
 -16   4   2-55.8056 58.6765   3
   4 -16   4 1896.82 169.814   2
 -16  -4  -4 1659.04 151.565   4
 -16  -4   4 1912.95 154.385   4
  -4 -16  -4 1658.09 125.195   4
   4  16   4 1749.28 153.237   3
  -4  16  -4 1813.40 134.042   3
  -4  16   4 1821.72 151.773   3
 -16   4   4 1785.40 141.453   3
 -16   4  -4 1651.68 140.591   4
  -4 -16   4 1718.03 144.290   2
 -16   4   4 1859.76 121.515   4
 -16  -4  -6 828.319 122.654   4
  -4 -16   6 577.613 105.224   2
 -16  -4   6 741.986 114.731   4
   4 -16   6 422.087 103.092   2
   4  16   6 367.381 97.2823   3
  -4  16  -6 536.100 80.5958   3
 -16   4   6 603.423 105.834   3
  -4  16   6 458.832 99.5535   3
   4 -16   8 1058.52 136.824   2
   4  16   8 728.880 119.236   3
 -16   4   8 662.781 105.917   3
  -4  16   8 918.833 125.694   3
 -16   5   1 23.3408 52.6746   4
 -16  -5  -1 1.03173 73.8082   4
 -16  -5   1 74.2045 75.5263   4
  -5 -16   1 41.2224 62.1030   2
  -5  16  -1-39.1668 62.5001   3
  -5  16   1 73.7379 68.4308   3
 -16   5   1-114.780 70.0138   3
 -16   5  -1-14.0793 58.2031   4
 -16   5   3 242.886 62.2325   4
 -16  -5  -3 127.148 86.8988   4
 -16  -5   3 267.900 92.6238   4
  -5 -16   3 278.126 81.5096   2
   5 -16   3 204.980 159.574   2
  -5  16  -3 210.704 69.9423   3
 -16   5   3 190.623 69.4521   3
  -5  16   3 315.464 83.6644   3
 -16   5  -3 295.183 77.2501   4
 -16  -5  -5-21.1839 78.8508   4
  -5 -16  -5 14.6334 61.4566   4
  -5 -16   5 30.0810 71.3870   2
 -16  -5   5 238.408 91.3482   4
   5  16   5 12.6775 80.1381   3
   5 -16   5-47.9170 80.7516   2
  -5  16  -5-65.3978 55.8249   3
 -16   5   5-9.00523 69.3551   3
  -5  16   5-81.6815 86.8647   3
 -16  -5  -7 93.5002 86.2342   4
  -5 -16   7-85.5204 84.2026   2
   5 -16   7 87.8850 87.4850   2
   5  16   7-110.224 88.4567   3
 -16   5   7-41.4491 84.1525   3
  -5  16   7-26.6795 92.2515   3
 -16  -6   0 8568.11 322.233   4
  -6  16   0 8110.24 284.788   3
 -16   6   0 8795.68 260.330   3
 -16   6   0 9021.70 270.602   4
 -16  -6  -2 237.000 83.6425   4
 -16  -6   2 610.617 110.686   4
  -6 -16   2 352.064 79.2620   2
   6 -16   2 547.081 108.389   2
  -6  16  -2 194.829 66.0060   3
 -16   6   2 295.279 74.6697   3
  -6  16   2 353.419 87.5656   3
 -16   6   2 420.197 74.1532   4
 -16  -6  -4 601.705 104.657   4
  -6 -16  -4 422.621 87.7054   4
 -16  -6   4 568.857 108.980   4
  -6 -16   4 692.647 100.896   2
   6 -16   4 378.273 104.222   2
  -6  16  -4 748.408 95.2424   3
 -16   6   4 475.566 89.0484   3
  -6  16   4 585.080 102.585   3
 -16  -6  -6 1402.24 156.391   4
  -6 -16  -6 962.328 109.388   4
  -6 -16   6 1106.30 124.415   2
   6 -16   6 1323.65 152.881   2
   6  16   6 1458.82 156.135   3
 -16   6   6 1291.46 134.766   3
  -6  16   6 1402.91 142.245   3
 -16   6   8 5993.94 275.532   3
 -16  -7  -1 11696.3 386.662   4
 -16  -7   1 12368.6 390.835   4
  -7 -16   1 12123.3 326.286   2
 -16   7   1 12252.0 324.223   3
  -7  16  -1 12114.1 341.742   3
  -7  16   1 11451.5 345.509   3
 -16  -7  -3 507.651 108.002   4
 -16  -7   3 654.433 118.167   4
  -7 -16  -3 443.512 97.1422   4
  -7 -16   3 632.245 97.0799   2
   7 -16   3 538.007 109.820   2
 -16   7   3 589.024 92.9353   3
  -7  16  -3 538.297 84.9536   3
  -7  16   3 498.758 103.058   3
 -16  -7  -5-61.4747 88.3741   4
  -7 -16  -5 12.0892 85.6554   4
  -7 -16   5-12.1814 64.8012   2
   7 -16   5-27.4588 87.7985   2
 -16   7   5-11.5773 69.8796   3
  -7  16   5 115.685 75.9494   3
  -7 -16  -7 13007.1 370.392   4
 -16   7   7 13819.0 406.252   3
  -7 -16   7 14152.1 398.739   2
 -16  -8   0 19367.4 504.127   4
 -16   8   0 18918.4 399.806   3
  -8  16   0 18081.5 433.518   3
 -16  -8  -2 1621.40 159.172   4
 -16  -8   2 1639.52 155.041   4
 -16   8   2 1407.48 124.462   3
  -8  16  -2 1237.41 116.738   3
  -8  16   2 1548.01 142.528   3
 -16  -8  -4 903.376 129.018   4
  -8 -16  -4 608.170 108.274   4
 -16  -8   4 979.273 138.699   4
   8 -16   4 926.086 135.951   2
 -16   8   4 665.508 102.736   3
  -8  16   4 975.553 125.634   3
  -8 -16  -6 4425.98 228.094   4
 -16   8   6 4733.63 234.357   3
  -8  16   6 4748.47 243.751   3
 -16   9   1 2880.36 161.930   3
  -9  16  -1 2904.60 169.915   3
  -9  16   1 2622.56 171.278   3
  -9 -16  -3 121.005 82.7777   4
 -16   9   3-42.0051 68.0646   3
  -9  16   3 3.00785 78.4146   3
  -9 -16  -5 237.070 88.5273   4
 -16   9   5-2.81299 74.2736   3
  -9  16   5 166.331 83.3620   3
  -9 -16  -7 3030.39 198.619   4
 -10  16   0 36.3031 65.1350   3
 -10 -16  -2 193.530 103.597   4
 -16  10   2 38.0659 60.3277   3
 -10  16   2 220.069 83.5452   3
 -10 -16  -4 852.885 123.517   4
 -16  10   4 776.785 109.655   3
 -10  16   4 896.498 119.553   3
 -10 -16  -6 62.6464 77.2394   4
 -11  16   1 506.357 94.0220   3
 -16  11   3 754.047 129.925   3
 -11  16   3 717.085 110.367   3
 -16  11   5 177.258 81.5686   3
 -12  16   2 92.9181 74.5450   3
 -17   0  -1 1029.90 118.980   4
 -17   0   1 1200.68 126.342   4
   0  17  -1 971.294 117.480   3
   0  17   1 964.896 126.047   3
   0 -17   1 1058.58 129.596   2
   0 -17   3 3113.06 205.824   2
 -17   0   3 3009.82 178.398   4
   0  17   3 2926.88 199.512   3
 -17   0  -3 2914.57 186.146   4
 -17   0   5 1592.01 137.294   4
   0  17   5 1827.43 165.157   3
   0 -17   5 1675.00 159.921   2
 -17   0  -5 1711.92 159.142   4
 -17   0  -7 929.390 126.008   4
 -17   0   7 930.940 111.863   4
   0 -17   7 1030.69 134.349   2
 -17   1   0 1102.70 120.677   4
 -17  -1   0 881.839 133.811   4
  -1  17   0 1141.84 125.057   3
 -17  -1   2 1342.22 129.789   4
 -17   1  -2 1270.50 127.553   4
 -17  -1  -2 1232.20 131.951   4
 -17   1   2 1101.50 117.351   4
  -1  17  -2 913.153 113.166   3
   1  17   2 1075.53 130.304   3
  -1  17   2 1120.32 128.487   3
  -1 -17   2 1298.39 139.822   2
   1 -17   2 1057.12 132.763   2
 -17   1  -4 349.087 90.6332   4
 -17  -1  -4 326.292 92.0899   4
 -17   1   4 210.056 67.3414   4
 -17  -1   4 304.358 85.1663   4
  -1 -17   4 481.397 106.547   2
   1 -17   4 369.177 110.487   2
   1  17   4 416.354 101.666   3
  -1  17   4 349.131 99.1811   3
 -17   1  -6 956.488 125.529   4
 -17  -1  -6 942.271 124.939   4
 -17   1   6 1064.57 114.003   4
 -17  -1   6 1143.77 125.139   4
  -1 -17   6 1092.50 134.494   2
   1 -17   6 887.891 126.334   2
   1  17   6 1178.65 139.302   3
  -1  17   6 1189.98 138.559   3
  -1 -17   8 607.293 112.226   2
 -17  -1   8 642.349 106.252   4
 -17   2  -1 671.397 107.242   4
 -17   2   1 768.177 100.199   4
 -17  -2  -1 624.700 109.610   4
 -17  -2   1 728.096 106.107   4
  -2  17  -1 654.684 97.4883   3
  -2  17   1 783.930 112.103   3
  -2 -17   1 754.117 115.419   2
 -17   2  -3 130.880 79.9952   4
 -17  -2  -3 94.5655 79.5195   4
 -17   2   3 187.494 68.5387   4
 -17  -2   3 123.625 85.9239   4
   2  17   3 85.6187 73.3884   3
  -2  17  -3 103.570 67.8218   3
  -2 -17   3 48.1320 77.4290   2
   2 -17   3 34.3777 87.3585   2
  -2  17   3 127.213 74.6302   3
 -17   2  -5 66.7700 68.9076   4
 -17  -2  -5 84.9762 77.6042   4
 -17   2   5-32.4796 72.4430   4
 -17  -2   5 228.516 84.1778   4
  -2 -17   5 113.221 80.9735   2
   2 -17   5 50.9961 84.1900   2
  -2  17  -5 86.8599 67.8253   3
   2  17   5 132.049 86.4258   3
  -2  17   5 378.990 93.4515   3
  -2 -17   7 870.043 124.956   2
 -17  -2   7 1098.37 132.714   4
   2 -17   7 859.031 128.464   2
 -17   2  -7 722.486 112.995   4
 -17  -2   9 530.292 108.299   4
 -17  -3   0 2327.32 173.664   4
  -3  17   0 2200.23 164.901   3
 -17   3   0 2489.54 161.037   4
 -17   3  -2 38.1922 68.8868   4
 -17   3   2 130.254 67.3461   4
 -17  -3  -2 8.16360 77.0764   4
 -17  -3   2 189.427 85.1860   4
  -3 -17   2 145.594 84.3901   2
  -3  17  -2 83.1805 70.3563   3
   3 -17   2 107.234 86.8752   2
  -3  17   2 116.167 76.8376   3
   3 -17   4 4278.97 244.540   2
 -17  -3   4 4539.31 232.192   4
   3  17   4 4506.35 246.406   3
  -3  17  -4 4187.27 209.082   3
  -3  17   4 4688.05 236.923   3
 -17   3  -4 4064.11 217.898   4
  -3 -17   4 4584.41 240.721   2
 -17  -3  -4 4219.60 234.300   4
 -17   3   4 4256.50 192.523   4
 -17  -3  -6-64.0336 89.3671   4
 -17  -3   6 49.0010 77.0826   4
  -3 -17   6 54.9286 78.2909   2
   3 -17   6 22.7885 82.0654   2
  -3  17  -6 61.5304 63.7344   3
   3  17   6-54.2908 90.7154   3
  -3  17   6-76.5261 89.1529   3
 -17   3   6-53.2367 77.4132   3
 -17   3  -6 0.58444 73.1347   4
  -3 -17   8 1172.53 141.139   2
 -17  -3   8 1408.96 150.057   4
 -17   4  -1 623.120 95.9410   4
 -17   4   1 686.882 94.9724   4
 -17  -4  -1 592.317 108.208   4
 -17  -4   1 665.194 115.227   4
  -4  17  -1 630.707 101.512   3
  -4 -17   1 676.440 103.048   2
  -4  17   1 655.440 104.836   3
  -4 -17   3 3630.41 209.636   2
 -17  -4  -3 3490.12 215.286   4
   4 -17   3 4030.60 240.189   2
 -17  -4   3 3676.42 214.309   4
  -4  17  -3 3280.85 187.320   3
  -4  17   3 3718.08 213.118   3
 -17   4   3 3661.00 195.867   3
 -17   4  -3 3558.53 198.408   4
 -17   4   3 3803.68 178.243   4
 -17  -4   5 2832.06 192.325   4
   4  17   5 2852.92 200.381   3
  -4  17  -5 2701.91 165.540   3
  -4  17   5 2426.41 181.209   3
 -17   4   5 2745.24 181.846   3
 -17   4  -5 2578.67 179.044   4
  -4 -17   5 2415.21 179.410   2
 -17  -4  -5 2544.71 196.217   4
   4 -17   5 2623.88 202.856   2
  -4 -17   7 886.280 131.945   2
 -17  -4   7 944.320 133.289   4
 -17   4   7 668.819 107.688   3
 -17  -5   0 1677.69 157.238   4
  -5  17   0 1528.70 139.202   3
 -17   5   0 1518.16 125.643   4
 -17   5   2 43.9466 55.1070   4
 -17  -5  -2-58.2712 83.1623   4
 -17  -5   2 72.3607 79.2900   4
  -5 -17   2 131.291 82.3923   2
   5 -17   2-19.0901 83.5883   2
  -5  17  -2 69.6056 65.2867   3
  -5  17   2 77.5855 77.4118   3
 -17   5   2 126.410 73.2940   3
 -17   5  -2-20.1613 69.4285   4
 -17  -5  -4 3067.18 209.465   4
   5 -17   4 3108.92 216.043   2
 -17  -5   4 2902.59 200.957   4
  -5 -17  -4 2677.15 163.741   4
  -5  17  -4 2969.29 172.950   3
 -17   5   4 2908.26 181.037   3
  -5  17   4 3069.97 198.062   3
  -5 -17   4 2687.54 184.376   2
 -17  -5   6 17.9980 89.5076   4
  -5 -17   6-54.6729 97.4277   2
 -17   5   6-38.0822 82.1075   3
  -5 -17   8 407.852 99.4124   2
 -17  -6  -1 743.669 115.323   4
 -17  -6   1 932.017 127.309   4
  -6  17  -1 805.524 107.899   3
  -6  17   1 581.074 104.304   3
 -17   6   1 746.572 93.2969   3
 -17   6  -1 685.863 93.0453   4
 -17   6   1 595.344 84.7975   4
 -17  -6  -3 42.2196 83.3866   4
 -17  -6   3 92.9722 82.1955   4
  -6 -17  -3-107.994 85.0740   4
  -6 -17   3-18.2788 71.8115   2
   6 -17   3-1.46442 87.3190   2
  -6  17  -3-92.1094 69.8479   3
 -17   6   3-19.2707 68.9084   3
  -6  17   3 120.380 79.1205   3
  -6 -17  -5-67.7752 77.8831   4
 -17  -6   5-102.363 100.590   4
  -6 -17   5-35.5968 81.7842   2
 -17   6   5-46.5485 75.1954   3
  -6  17   5-69.1625 92.8424   3
  -6 -17   7 645.956 109.292   2
 -17   6   7 630.562 111.194   3
 -17  -7   0 976.119 133.008   4
  -7  17   0 989.365 116.887   3
 -17  -7   2 1088.95 141.053   4
 -17   7   2 949.247 108.513   3
  -7  17  -2 955.153 109.806   3
  -7  17   2 927.913 117.313   3
  -7 -17  -4 641.010 106.000   4
 -17   7   4 780.370 113.521   3
  -7  17   4 674.620 111.474   3
  -7 -17   6 1141.77 131.045   2
 -17   7   6 1035.35 130.750   3
  -7 -17   8 170.630 88.8333   2
  -8  17  -1 952.627 114.256   3
  -8  17   1 808.155 115.677   3
  -8 -17  -3 1298.65 139.151   4
 -17   8   3 1390.16 130.307   3
  -8  17   3 1386.47 140.858   3
  -8 -17  -5 1271.04 138.492   4
 -17   8   5 1130.52 130.941   3
  -9  17   0 792.727 108.442   3
  -9 -17  -2 331.532 94.7154   4
  -9  17   2 372.472 90.8833   3
  -9 -17  -4-60.2701 81.4281   4
 -17   9   4 66.3923 77.4124   3
  -9 -17  -6 333.103 104.427   4
 -10  17   1 381.293 91.8248   3
   0  18   0 4505.58 234.101   3
 -18   0   0 4537.33 230.101   4
 -18   0  -2 260.184 85.8506   4
 -18   0   2 168.808 73.0567   4
   0  18  -2 253.581 85.3932   3
   0  18   2 333.411 96.8569   3
   0 -18   2 347.547 101.013   2
   0 -18   4 11110.6 389.401   2
 -18   0   4 10524.9 336.366   4
   0  18   4 10888.5 376.560   3
 -18   0  -4 10104.2 359.187   4
 -18   0   6 191.397 81.7133   4
   0 -18   6 301.362 100.457   2
 -18   1  -1 299.156 85.6804   4
 -18   1   1 562.361 102.695   4
 -18  -1  -1 507.976 104.426   4
 -18  -1   1 439.656 93.5173   4
   1  18   1 323.031 96.2421   3
  -1  18  -1 392.927 95.8862   3
  -1  18   1 534.839 102.519   3
 -18   1  -3 1331.29 139.633   4
 -18  -1  -3 1167.52 135.490   4
 -18   1   3 1151.62 122.623   4
 -18  -1   3 1086.91 126.967   4
  -1  18  -3 1191.69 130.250   3
   1  18   3 1359.09 151.362   3
  -1 -18   3 1165.21 142.783   2
   1 -18   3 1618.48 161.557   2
  -1  18   3 1348.28 148.439   3
 -18   1  -5 664.443 112.260   4
 -18  -1  -5 557.309 105.209   4
 -18   1   5 697.967 104.780   4
 -18  -1   5 891.147 117.850   4
  -1 -18   5 641.272 115.258   2
   1 -18   5 974.296 138.324   2
 -18  -1   7 970.854 123.590   4
 -18   2   0 356.597 85.9405   4
 -18  -2   0 426.664 101.109   4
  -2  18   0 559.473 103.076   3
 -18   2  -2 214.974 73.0389   4
 -18   2   2 329.748 82.1074   4
 -18  -2  -2 260.716 88.5246   4
 -18  -2   2 305.133 91.4688   4
   2  18   2 337.835 96.0510   3
  -2  18  -2 274.950 85.4043   3
  -2 -18   2 460.199 109.723   2
  -2  18   2 258.279 93.3949   3
   2 -18   2 437.256 112.139   2
 -18   2   4 2018.17 148.900   4
   2 -18   4 2374.39 192.854   2
 -18  -2   4 2105.74 167.156   4
  -2  18  -4 1797.26 156.334   3
  -2  18   4 2312.36 185.450   3
 -18   2  -4 2162.14 168.735   4
 -18  -2  -4 1936.67 173.531   4
  -2 -18   4 2071.53 180.579   2
 -18  -2   6 130.386 80.2826   4
  -2 -18   6 150.915 88.5142   2
  -2  18  -6-16.6747 88.3946   3
 -18  -2   8 587.018 111.704   4
 -18  -3  -1 2120.13 173.477   4
 -18  -3   1 2240.00 175.916   4
  -3  18  -1 2269.44 166.875   3
  -3  18   1 2486.88 178.387   3
 -18   3  -1 2293.92 166.245   4
 -18   3   1 2172.59 153.650   4
  -3 -18   3 14652.2 431.843   2
 -18  -3   3 14149.6 419.055   4
   3 -18   3 15528.9 470.557   2
  -3  18  -3 14579.8 404.211   3
  -3  18   3 14432.3 427.949   3
 -18   3  -3 13835.9 402.351   4
 -18   3   3 14384.3 374.121   4
 -18  -3  -3 15231.3 443.343   4
 -18  -3   5 7567.08 309.025   4
  -3  18  -5 7050.63 273.890   3
 -18   3  -5 6945.66 294.440   4
  -3 -18   5 7573.09 318.977   2
 -18  -3   7 4303.73 239.275   4
  -3 -18   7 4171.28 246.137   2
 -18  -3   9 149.817 103.854   4
 -18  -4   0 8733.36 332.146   4
  -4  18   0 8384.24 309.559   3
 -18   4   0 8229.39 288.488   4
 -18  -4  -2 2310.89 187.456   4
 -18  -4   2 2051.80 177.033   4
  -4 -18   2 2327.61 173.915   2
  -4  18  -2 2260.75 169.214   3
  -4  18   2 2375.28 182.052   3
 -18   4  -2 2012.43 157.252   4
 -18   4   2 2348.30 153.658   4
 -18  -4   4 23859.9 562.563   4
  -4  18  -4 22677.4 503.016   3
 -18   4  -4 21219.3 510.331   4
  -4 -18   4 23175.3 551.884   2
 -18  -4   6 66.9789 86.8320   4
  -4 -18   6 53.2174 94.2190   2
 -18   4   6 314.938 92.9021   3
 -18   5   1 311.375 75.0538   4
 -18  -5   1 455.594 104.171   4
  -5  18  -1 332.391 90.8865   3
  -5  18   1 483.548 107.609   3
 -18   5  -1 416.669 85.3742   4
  -5 -18   3 7367.55 296.172   2
 -18  -5   3 7358.71 313.974   4
  -5  18  -3 6861.62 271.025   3
  -5  18   3 7015.42 298.176   3
 -18   5   3 7285.18 279.187   3
 -18   5  -3 7263.40 282.276   4
 -18   5   5 3604.07 211.629   3
  -5 -18   5 3610.14 222.394   2
  -5 -18   7 1190.19 143.836   2
  -6  18   0 392.164 94.9864   3
  -6  18  -2 128.529 71.2572   3
 -18   6   2 109.572 70.6965   3
  -6  18   2-1.75704 77.8729   3
  -6 -18   4 56.1641 84.3189   2
 -18   6   4 152.718 80.3824   3
  -6 -18   6 325.318 91.8136   2
  -7  18  -1 1153.52 128.322   3
  -7  18   1 1294.24 139.306   3
  -7 -18  -3 3164.19 200.170   4
 -18   7   3 3296.34 212.901   3
 -18   7   5 1313.91 140.637   3
  -8  18   0 2240.98 168.064   3
  -8 -18  -2 355.570 99.9535   4
  -8  18   2 354.199 96.7277   3
  -8 -18  -4 4494.04 241.863   4
 -18   8   4 4571.99 235.071   3
  -9  18   1 2.77575 74.1791   3
 -19   0   1 2569.23 188.254   4
   0  19  -1 2862.07 196.209   3
 -19   0  -1 2490.26 183.846   4
 -19   0   3 4277.62 224.077   4
   0 -19   3 4853.44 267.311   2
   0  19  -3 4626.10 240.536   3
 -19   0   5 668.404 109.938   4
 -19  -1   0 2153.65 172.489   4
  -1  19   0 2387.61 182.047   3
 -19   1   0 2236.08 169.559   4
 -19   1  -2 70.3672 75.2372   4
 -19  -1  -2-31.5963 80.0809   4
 -19   1   2-32.5729 75.0374   4
 -19  -1   2-162.978 91.6071   4
  -1  19  -2-59.7576 88.8146   3
  -1 -19   2-19.5253 91.3717   2
 -19   1   4 922.957 117.611   4
 -19  -1   4 997.184 129.259   4
  -1  19  -4 774.754 119.384   3
  -1 -19   4 1114.57 151.451   2
 -19  -1   6 472.344 105.478   4
  -1  19  -6 247.471 82.3368   3
 -19   2  -1 24.3756 76.2427   4
 -19   2   1-134.569 82.3223   4
  -2  19  -1 64.5245 82.5435   3
 -19  -2   3 2451.82 183.657   4
  -2 -19   3 2239.19 186.269   2
  -2  19  -3 2084.75 172.985   3
 -19   2  -3 2514.75 188.024   4
 -19   2   3 2182.88 158.468   4
 -19  -2   5 2261.07 178.468   4
  -2  19  -5 1978.27 164.041   3
 -19  -2   7 134.174 95.1725   4
  -3  19   0 4536.39 242.201   3
 -19   3   0 4553.97 227.913   4
  -3 -19   2 3053.89 206.001   2
  -3  19  -2 2709.68 189.589   3
 -19   3  -2 2702.93 184.385   4
 -19   3   2 2544.78 167.921   4
  -3 -19   4 18351.9 508.607   2
  -3  19  -4 18118.7 464.318   3
 -19   3  -4 17748.3 477.392   4
  -4  19  -1 668.360 108.260   3
 -19   4  -1 725.162 108.625   4
  -4 -19   3 16760.9 474.215   2
  -4  19  -3 16860.4 445.749   3
 -19   4  -3 16508.8 450.586   4
  -4 -19   5 9910.14 374.591   2
  -5  19   0 956.241 128.629   3
  -5  19  -2 1774.11 153.218   3
 -19   5  -2 1779.20 150.714   4
  -5 -19   4 9521.59 356.243   2
  -6  19  -1 736.490 113.067   3
 -20   0   2-58.5421 81.2280   4
 -20   1   1-12.2880 73.2982   4
 -20   1   3 60.6304 80.0428   4
 -20   2   0 35.6279 77.2282   4
 -20   2   2 439.351 104.024   4
 -20   3  -1-37.5657 81.2299   4
   0   0   0    0.00    0.00   0
 
TITL pr780 in I4/mmm
REM I4/mmm (#139 in standard setting)
CELL 0.71073  14.665645  14.665645  14.574641  90.0000  90.0000  90.0000
ZERR    4.00   0.000277   0.000277   0.000429   0.0000   0.0000   0.0000
LATT  2
SYMM -x,-y, z
SYMM -y, x, z
SYMM  y,-x, z
SYMM -x, y,-z
SYMM  x,-y,-z
SYMM  y, x,-z
SYMM -y,-x,-z
SFAC C H N O Mo I
UNIT 80.00 80.00 40.00 40.00 24.00 32.00
TREF
HKLF 4
END
;
_shelx_hkl_checksum              71741
