# Supplementary material for: Cyanide Complexes Based on {Mo6I8}4+ and {W6I8}4+ Cluster Cores
Source: MDPI journal article supplement (doi:10.3390/molecules25245796), 2020-12-08
Supplement: s1 [file s1 › Compound 5.cif]

 
data_pr892

_audit_creation_method           SHELXL-2018/3
_shelx_SHELXL_version_number     2018/3
_chemical_name_systematic        ?
_chemical_name_common            ?
_chemical_melting_point          ?
_chemical_formula_moiety         ?
_chemical_formula_sum            'C38 H94 I8 N4 O9 W6'
_chemical_formula_weight         2869.47

loop_
_atom_type_symbol
_atom_type_description
_atom_type_scat_dispersion_real
_atom_type_scat_dispersion_imag
_atom_type_scat_source
C C 0.0033 0.0016 'International Tables Vol C Tables 4.2.6.8 and 6.1.1.4'
H H 0.0000 0.0000 'International Tables Vol C Tables 4.2.6.8 and 6.1.1.4'
N N 0.0061 0.0033 'International Tables Vol C Tables 4.2.6.8 and 6.1.1.4'
O O 0.0106 0.0060 'International Tables Vol C Tables 4.2.6.8 and 6.1.1.4'
I I -0.4742 1.8119 'International Tables Vol C Tables 4.2.6.8 and 6.1.1.4'
W W -0.8490 6.8722 'International Tables Vol C Tables 4.2.6.8 and 6.1.1.4'

_space_group_crystal_system      monoclinic
_space_group_IT_number           14
_space_group_name_H-M_alt        'P 21/n'
_space_group_name_Hall           '-P 2yn'

_shelx_space_group_comment       
;
The symmetry employed for this shelxl refinement is uniquely defined
by the following loop, which should always be used as a source of
symmetry information in preference to the above space-group names.
They are only intended as comments.
;

loop_
_space_group_symop_operation_xyz
'x, y, z'
'-x+1/2, y+1/2, -z+1/2'
'-x, -y, -z'
'x-1/2, -y-1/2, z-1/2'

_cell_length_a                   9.8189(3)
_cell_length_b                   15.4901(5)
_cell_length_c                   21.8314(8)
_cell_angle_alpha                90
_cell_angle_beta                 97.5120(10)
_cell_angle_gamma                90
_cell_volume                     3291.97(19)
_cell_formula_units_Z            2
_cell_measurement_temperature    150(2)
_cell_measurement_reflns_used    9918
_cell_measurement_theta_min      2.63
_cell_measurement_theta_max      30.14

_exptl_crystal_description       needle
_exptl_crystal_colour            orange
_exptl_crystal_density_meas      ?
_exptl_crystal_density_method    ?
_exptl_crystal_density_diffrn    2.895
_exptl_crystal_F_000             2580
_exptl_transmission_factor_min   ?
_exptl_transmission_factor_max   ?
_exptl_crystal_size_max          0.12
_exptl_crystal_size_mid          0.05
_exptl_crystal_size_min          0.05
_exptl_absorpt_coefficient_mu    14.235
_shelx_estimated_absorpt_T_min   0.280
_shelx_estimated_absorpt_T_max   0.536
_exptl_absorpt_correction_type   multi-scan
_exptl_absorpt_correction_T_min  0.5903
_exptl_absorpt_correction_T_max  0.7461
_exptl_absorpt_process_details   'SADABS (Bruker-AXS, 2016)'
_exptl_absorpt_special_details   ?

_diffrn_radiation_monochromator  'Incoatec HELIOS multilayer mirrors'
_diffrn_measurement_device       'three-circle diffractometer'
_diffrn_detector_type            'Bruker PHOTON III area detector'
_diffrn_detector                 PIXEL
_diffrn_ambient_temperature      150(2)
_diffrn_radiation_wavelength     0.71073
_diffrn_radiation_type           MoK\a
_diffrn_source                   'Incoatec IuS3.0 microfocus X-ray tube'
_diffrn_measurement_device_type  'Bruker D8 Venture diffractometer'
_diffrn_measurement_method       '\w and \f scans'
_diffrn_detector_area_resol_mean 7.41
_diffrn_reflns_number            50844
_diffrn_reflns_av_unetI/netI     0.0342
_diffrn_reflns_av_R_equivalents  0.0547
_diffrn_reflns_limit_h_min       -12
_diffrn_reflns_limit_h_max       12
_diffrn_reflns_limit_k_min       -20
_diffrn_reflns_limit_k_max       20
_diffrn_reflns_limit_l_min       -25
_diffrn_reflns_limit_l_max       28
_diffrn_reflns_theta_min         1.882
_diffrn_reflns_theta_max         27.482
_diffrn_reflns_theta_full        25.500
_diffrn_measured_fraction_theta_max 0.999
_diffrn_measured_fraction_theta_full 0.999
_diffrn_reflns_Laue_measured_fraction_max 0.999
_diffrn_reflns_Laue_measured_fraction_full 0.999
_diffrn_reflns_point_group_measured_fraction_max 0.999
_diffrn_reflns_point_group_measured_fraction_full 0.999
_reflns_number_total             7549
_reflns_number_gt                6533
_reflns_threshold_expression     'I > 2\s(I)'
_reflns_Friedel_coverage         0.000
_reflns_Friedel_fraction_max     .
_reflns_Friedel_fraction_full    .

_reflns_special_details          
;
 Reflections were merged by SHELXL according to the crystal
 class for the calculation of statistics and refinement.
 
 _reflns_Friedel_fraction is defined as the number of unique
 Friedel pairs measured divided by the number that would be
 possible theoretically, ignoring centric projections and
 systematic absences.
;
_computing_data_collection       'APEX3 (Bruker-AXS, 2016)'
_computing_cell_refinement       'SAINT (Bruker-AXS, 2016)'
_computing_data_reduction        'SAINT (Bruker-AXS, 2016)'
_computing_structure_solution    'SHELXT-2018 (Sheldrick, 2015)'
_computing_structure_refinement  'SHELXL-2018 (Sheldrick, 2015)'
_computing_molecular_graphics    'ShelXle (H\"ubschle, 2011)'
_computing_publication_material  'CIFTAB (Sheldrick, 2015)'

_refine_special_details          ?
_refine_ls_structure_factor_coef Fsqd
_refine_ls_matrix_type           full
_refine_ls_weighting_scheme      calc
_refine_ls_weighting_details     
'w=1/[\s^2^(Fo^2^)+(0.0103P)^2^+23.9630P] where P=(Fo^2^+2Fc^2^)/3'
_atom_sites_solution_primary     dual
_atom_sites_solution_secondary   difmap
_atom_sites_solution_hydrogens   geom
_refine_ls_hydrogen_treatment    constr
_refine_ls_extinction_method     none
_refine_ls_extinction_coef       .
_refine_ls_number_reflns         7549
_refine_ls_number_parameters     313
_refine_ls_number_restraints     6
_refine_ls_R_factor_all          0.0378
_refine_ls_R_factor_gt           0.0308
_refine_ls_wR_factor_ref         0.0604
_refine_ls_wR_factor_gt          0.0572
_refine_ls_goodness_of_fit_ref   1.046
_refine_ls_restrained_S_all      1.045
_refine_ls_shift/su_max          0.002
_refine_ls_shift/su_mean         0.000

loop_
_atom_site_label
_atom_site_type_symbol
_atom_site_fract_x
_atom_site_fract_y
_atom_site_fract_z
_atom_site_U_iso_or_equiv
_atom_site_adp_type
_atom_site_occupancy
_atom_site_site_symmetry_order
_atom_site_calc_flag
_atom_site_refinement_flags_posn
_atom_site_refinement_flags_adp
_atom_site_refinement_flags_occupancy
_atom_site_disorder_assembly
_atom_site_disorder_group
W1 W 0.53036(3) 0.46649(2) 0.42000(2) 0.02145(6) Uani 1 1 d . . . . .
W2 W 0.65116(3) 0.57545(2) 0.50404(2) 0.02121(6) Uani 1 1 d . . . . .
W3 W 0.38197(3) 0.58991(2) 0.46597(2) 0.02060(6) Uani 1 1 d . . . . .
I1 I 0.56810(5) 0.63769(3) 0.38304(2) 0.02748(10) Uani 1 1 d . . . . .
I2 I 0.81547(5) 0.45043(3) 0.45432(2) 0.03219(11) Uani 1 1 d . . . . .
I3 I 0.50416(5) 0.70865(3) 0.55432(2) 0.02778(10) Uani 1 1 d . . . . .
I4 I 0.75025(5) 0.52185(3) 0.62496(2) 0.03085(11) Uani 1 1 d . . . . .
C1 C 0.5677(8) 0.4235(4) 0.3279(3) 0.0300(16) Uani 1 1 d . . . . .
N1 N 0.5863(7) 0.3975(4) 0.2802(3) 0.0360(15) Uani 1 1 d . . . . .
O2 O 0.8164(6) 0.6563(4) 0.5037(3) 0.0514(16) Uani 1 1 d . . . . .
C2 C 0.8789(9) 0.7168(5) 0.5395(4) 0.045(2) Uani 1 1 d . . . . .
H2A H 0.963307 0.734357 0.523376 0.068 Uiso 1 1 calc R U . . .
H2B H 0.901846 0.694248 0.581508 0.068 Uiso 1 1 calc R U . . .
H2C H 0.818010 0.766854 0.540217 0.068 Uiso 1 1 calc R U . . .
O3 O 0.2488(5) 0.6831(3) 0.4279(3) 0.0364(12) Uani 1 1 d . . . . .
C3 C 0.2655(9) 0.7699(5) 0.4188(4) 0.043(2) Uani 1 1 d . . . . .
H3A H 0.183863 0.792894 0.393461 0.064 Uiso 1 1 calc R U . . .
H3B H 0.346381 0.779282 0.397655 0.064 Uiso 1 1 calc R U . . .
H3C H 0.278338 0.799520 0.458822 0.064 Uiso 1 1 calc R U . . .
N11 N 0.2073(5) 0.8696(3) 0.6737(2) 0.0218(11) Uani 1 1 d . . . . .
C11 C 0.2421(7) 0.8947(4) 0.6100(3) 0.0246(14) Uani 1 1 d . . . . .
H11A H 0.307214 0.851692 0.597043 0.030 Uiso 1 1 calc R U . . .
H11B H 0.157151 0.891838 0.580137 0.030 Uiso 1 1 calc R U . . .
C12 C 0.3044(7) 0.9838(4) 0.6066(3) 0.0285(15) Uani 1 1 d . . . . .
H12A H 0.394654 0.985658 0.632713 0.034 Uiso 1 1 calc R U . . .
H12B H 0.243828 1.027100 0.622625 0.034 Uiso 1 1 calc R U . . .
C13 C 0.3227(10) 1.0062(5) 0.5403(4) 0.049(2) Uani 1 1 d . . . . .
H13A H 0.233619 0.999918 0.513632 0.059 Uiso 1 1 calc R U . . .
H13B H 0.388692 0.965460 0.525366 0.059 Uiso 1 1 calc R U . . .
C14 C 0.3752(10) 1.0984(5) 0.5357(4) 0.055(3) Uani 1 1 d . . . . .
H14A H 0.385932 1.111279 0.492637 0.082 Uiso 1 1 calc R U . . .
H14B H 0.464163 1.104358 0.561522 0.082 Uiso 1 1 calc R U . . .
H14C H 0.309271 1.138804 0.549964 0.082 Uiso 1 1 calc R U . . .
C21 C 0.3318(6) 0.8785(4) 0.7224(3) 0.0232(13) Uani 1 1 d . . . . .
H21A H 0.356844 0.940354 0.726344 0.028 Uiso 1 1 calc R U . . .
H21B H 0.305713 0.859556 0.762596 0.028 Uiso 1 1 calc R U . . .
C22 C 0.4570(6) 0.8283(4) 0.7101(3) 0.0264(14) Uani 1 1 d . . . . .
H22A H 0.481541 0.844612 0.669136 0.032 Uiso 1 1 calc R U . . .
H22B H 0.435243 0.765844 0.709181 0.032 Uiso 1 1 calc R U . . .
C23 C 0.5785(7) 0.8450(5) 0.7590(3) 0.0329(16) Uani 1 1 d . . . . .
H23A H 0.550406 0.834911 0.800304 0.039 Uiso 1 1 calc R U . . .
H23B H 0.606210 0.906277 0.756802 0.039 Uiso 1 1 calc R U . . .
C24 C 0.7010(8) 0.7878(5) 0.7513(4) 0.047(2) Uani 1 1 d . . . . .
H24A H 0.778714 0.803804 0.782057 0.070 Uiso 1 1 calc R U . . .
H24B H 0.726585 0.795481 0.709722 0.070 Uiso 1 1 calc R U . . .
H24C H 0.676717 0.727282 0.757163 0.070 Uiso 1 1 calc R U . . .
C31 C 0.0966(6) 0.9282(4) 0.6926(3) 0.0252(14) Uani 1 1 d . . . . .
H31A H 0.131669 0.988193 0.694717 0.030 Uiso 1 1 calc R U . . .
H31B H 0.079047 0.911723 0.734688 0.030 Uiso 1 1 calc R U . . .
C32 C -0.0392(7) 0.9265(5) 0.6501(3) 0.0318(16) Uani 1 1 d . . . . .
H32A H -0.074372 0.866586 0.646407 0.038 Uiso 1 1 calc R U . . .
H32B H -0.024638 0.946654 0.608435 0.038 Uiso 1 1 calc R U . . .
C33 C -0.1444(7) 0.9845(5) 0.6756(4) 0.0355(17) Uani 1 1 d . . . . .
H33A H -0.160267 0.963308 0.716886 0.043 Uiso 1 1 calc R U . . .
H33B H -0.107650 1.043926 0.680482 0.043 Uiso 1 1 calc R U . . .
C34 C -0.2786(8) 0.9857(6) 0.6335(4) 0.048(2) Uani 1 1 d . . . . .
H34A H -0.343790 1.023401 0.651009 0.072 Uiso 1 1 calc R U . . .
H34B H -0.316039 0.927070 0.629216 0.072 Uiso 1 1 calc R U . . .
H34C H -0.263395 1.007548 0.592792 0.072 Uiso 1 1 calc R U . . .
C41 C 0.1589(7) 0.7766(4) 0.6684(3) 0.0256(14) Uani 1 1 d . . . . .
H41A H 0.236230 0.740067 0.658949 0.031 Uiso 1 1 calc R U . . .
H41B H 0.085065 0.772036 0.632988 0.031 Uiso 1 1 calc R U . . .
C42 C 0.1054(7) 0.7405(4) 0.7254(3) 0.0289(15) Uani 1 1 d . . . . .
H42A H 0.028551 0.776741 0.735712 0.035 Uiso 1 1 calc R U . . .
H42B H 0.179370 0.742121 0.760791 0.035 Uiso 1 1 calc R U . . .
C43 C 0.0561(8) 0.6481(5) 0.7143(4) 0.0407(19) Uani 1 1 d . . . . .
H43A H -0.011269 0.645653 0.676425 0.049 Uiso 1 1 calc R U . . .
H43B H 0.134925 0.610826 0.707982 0.049 Uiso 1 1 calc R U . . .
C44 C -0.0099(8) 0.6149(5) 0.7686(4) 0.0365(18) Uani 1 1 d . . . . .
H44A H -0.036884 0.554486 0.761351 0.055 Uiso 1 1 calc R U . . .
H44B H -0.091332 0.649622 0.773233 0.055 Uiso 1 1 calc R U . . .
H44C H 0.055865 0.619104 0.806314 0.055 Uiso 1 1 calc R U . . .
O1W O -0.0393(6) 0.6793(4) 0.3989(3) 0.0490(15) Uani 1 1 d . . . . .
O2W O -0.1129(8) 0.8418(4) 0.3494(3) 0.0395(18) Uani 0.75 1 d . . P . .
O3W O -0.005(3) 1.095(2) 0.5184(6) 0.058(4) Uani 0.5 1 d . U P . .
O4W O -0.001(6) 1.092(4) 0.5419(14) 0.055(6) Uani 0.25 1 d . U P . .

loop_
_atom_site_aniso_label
_atom_site_aniso_U_11
_atom_site_aniso_U_22
_atom_site_aniso_U_33
_atom_site_aniso_U_23
_atom_site_aniso_U_13
_atom_site_aniso_U_12
W1 0.02616(13) 0.01553(12) 0.02236(14) 0.00138(10) 0.00209(11) -0.00074(10)
W2 0.02095(12) 0.01590(12) 0.02599(15) 0.00261(10) 0.00004(10) -0.00332(10)
W3 0.02153(12) 0.01495(12) 0.02475(14) 0.00313(10) 0.00089(10) 0.00022(10)
I1 0.0325(2) 0.0199(2) 0.0308(2) 0.00672(17) 0.00697(19) -0.00138(17)
I2 0.0253(2) 0.0314(2) 0.0411(3) 0.0079(2) 0.0089(2) 0.00369(18)
I3 0.0391(2) 0.01489(19) 0.0294(2) -0.00136(16) 0.0047(2) -0.00137(17)
I4 0.0323(2) 0.0269(2) 0.0299(3) 0.00493(18) -0.00921(19) -0.00524(18)
C1 0.041(4) 0.019(3) 0.030(4) 0.009(3) 0.004(3) 0.002(3)
N1 0.054(4) 0.027(3) 0.028(4) -0.001(3) 0.010(3) 0.001(3)
O2 0.042(3) 0.051(4) 0.061(4) 0.014(3) 0.006(3) -0.019(3)
C2 0.044(5) 0.042(5) 0.047(5) -0.006(4) -0.008(4) 0.000(4)
O3 0.031(3) 0.029(3) 0.047(3) 0.014(2) -0.002(2) 0.006(2)
C3 0.056(5) 0.025(4) 0.043(5) 0.003(3) -0.007(4) 0.007(4)
N11 0.016(2) 0.027(3) 0.022(3) -0.004(2) 0.003(2) -0.002(2)
C11 0.023(3) 0.029(3) 0.022(3) -0.002(3) 0.005(3) -0.003(3)
C12 0.028(3) 0.028(4) 0.030(4) 0.002(3) 0.006(3) 0.000(3)
C13 0.068(6) 0.043(5) 0.039(5) -0.004(4) 0.018(4) -0.025(4)
C14 0.074(6) 0.037(5) 0.058(6) 0.008(4) 0.029(5) -0.018(4)
C21 0.026(3) 0.025(3) 0.018(3) -0.004(3) 0.000(3) -0.004(3)
C22 0.024(3) 0.019(3) 0.035(4) -0.003(3) 0.001(3) 0.000(3)
C23 0.033(4) 0.040(4) 0.023(4) 0.000(3) -0.003(3) 0.001(3)
C24 0.034(4) 0.044(5) 0.057(6) 0.006(4) -0.011(4) 0.010(4)
C31 0.021(3) 0.026(3) 0.030(4) -0.001(3) 0.007(3) 0.003(3)
C32 0.028(3) 0.037(4) 0.033(4) -0.003(3) 0.012(3) -0.001(3)
C33 0.024(3) 0.050(5) 0.033(4) 0.001(4) 0.005(3) 0.002(3)
C34 0.028(4) 0.075(6) 0.040(5) 0.003(4) 0.001(4) 0.013(4)
C41 0.028(3) 0.021(3) 0.027(4) -0.005(3) 0.004(3) -0.006(3)
C42 0.035(4) 0.018(3) 0.034(4) 0.000(3) 0.005(3) -0.004(3)
C43 0.044(4) 0.031(4) 0.048(5) 0.000(4) 0.009(4) -0.019(4)
C44 0.039(4) 0.025(4) 0.046(5) 0.013(3) 0.007(4) -0.001(3)
O1W 0.057(4) 0.049(3) 0.043(4) 0.012(3) 0.015(3) 0.002(3)
O2W 0.059(5) 0.028(3) 0.037(4) 0.011(3) 0.026(4) 0.020(3)
O3W 0.064(7) 0.077(8) 0.026(11) 0.011(13) -0.019(12) 0.020(6)
O4W 0.066(9) 0.071(10) 0.022(15) 0.012(17) -0.021(16) 0.018(8)

_geom_special_details            
;
 All esds (except the esd in the dihedral angle between two l.s. planes)
 are estimated using the full covariance matrix.  The cell esds are taken
 into account individually in the estimation of esds in distances, angles
 and torsion angles; correlations between esds in cell parameters are only
 used when they are defined by crystal symmetry.  An approximate (isotropic)
 treatment of cell esds is used for estimating esds involving l.s. planes.
;

loop_
_geom_bond_atom_site_label_1
_geom_bond_atom_site_label_2
_geom_bond_distance
_geom_bond_site_symmetry_2
_geom_bond_publ_flag
W1 W2 2.6558(4) . ?
W1 W2 2.6685(4) 3_666 ?
W1 W3 2.6723(4) 3_666 ?
W1 W3 2.6772(4) . ?
W1 I1 2.8106(5) . ?
W1 I2 2.8128(5) . ?
W1 I3 2.7998(5) 3_666 ?
W1 I4 2.8071(5) 3_666 ?
W1 C1 2.195(7) . ?
W2 W3 2.6742(4) 3_666 ?
W2 W3 2.6745(4) . ?
W2 I1 2.8301(5) . ?
W2 I2 2.8266(5) . ?
W2 I3 2.8213(5) . ?
W2 I4 2.8165(5) . ?
W2 O2 2.051(5) . ?
W3 I1 2.8339(5) . ?
W3 I2 2.8388(5) 3_666 ?
W3 I3 2.8175(5) . ?
W3 I4 2.8193(5) 3_666 ?
W3 O3 2.049(5) . ?
C1 N1 1.153(9) . ?
O2 C2 1.320(10) . ?
C2 H2A 0.9800 . ?
C2 H2B 0.9800 . ?
C2 H2C 0.9800 . ?
O3 C3 1.372(8) . ?
C3 H3A 0.9800 . ?
C3 H3B 0.9800 . ?
C3 H3C 0.9800 . ?
N11 C11 1.524(8) . ?
N11 C21 1.519(8) . ?
N11 C31 1.515(8) . ?
N11 C41 1.518(8) . ?
C11 H11A 0.9900 . ?
C11 H11B 0.9900 . ?
C11 C12 1.516(9) . ?
C12 H12A 0.9900 . ?
C12 H12B 0.9900 . ?
C12 C13 1.520(10) . ?
C13 H13A 0.9900 . ?
C13 H13B 0.9900 . ?
C13 C14 1.527(10) . ?
C14 H14A 0.9800 . ?
C14 H14B 0.9800 . ?
C14 H14C 0.9800 . ?
C21 H21A 0.9900 . ?
C21 H21B 0.9900 . ?
C21 C22 1.507(9) . ?
C22 H22A 0.9900 . ?
C22 H22B 0.9900 . ?
C22 C23 1.515(9) . ?
C23 H23A 0.9900 . ?
C23 H23B 0.9900 . ?
C23 C24 1.521(10) . ?
C24 H24A 0.9800 . ?
C24 H24B 0.9800 . ?
C24 H24C 0.9800 . ?
C31 H31A 0.9900 . ?
C31 H31B 0.9900 . ?
C31 C32 1.521(10) . ?
C32 H32A 0.9900 . ?
C32 H32B 0.9900 . ?
C32 C33 1.528(9) . ?
C33 H33A 0.9900 . ?
C33 H33B 0.9900 . ?
C33 C34 1.505(10) . ?
C34 H34A 0.9800 . ?
C34 H34B 0.9800 . ?
C34 H34C 0.9800 . ?
C41 H41A 0.9900 . ?
C41 H41B 0.9900 . ?
C41 C42 1.519(9) . ?
C42 H42A 0.9900 . ?
C42 H42B 0.9900 . ?
C42 C43 1.519(9) . ?
C43 H43A 0.9900 . ?
C43 H43B 0.9900 . ?
C43 C44 1.513(10) . ?
C44 H44A 0.9800 . ?
C44 H44B 0.9800 . ?
C44 H44C 0.9800 . ?

loop_
_geom_angle_atom_site_label_1
_geom_angle_atom_site_label_2
_geom_angle_atom_site_label_3
_geom_angle
_geom_angle_site_symmetry_1
_geom_angle_site_symmetry_3
_geom_angle_publ_flag
W2 W1 W2 89.981(11) . 3_666 ?
W2 W1 W3 60.033(9) 3_666 . ?
W2 W1 W3 60.100(10) 3_666 3_666 ?
W2 W1 W3 60.197(10) . . ?
W2 W1 W3 60.251(10) . 3_666 ?
W2 W1 I1 62.285(13) . . ?
W2 W1 I1 122.138(14) 3_666 . ?
W2 W1 I2 62.168(13) . . ?
W2 W1 I2 122.360(15) 3_666 . ?
W2 W1 I3 62.062(12) 3_666 3_666 ?
W2 W1 I3 122.161(15) . 3_666 ?
W2 W1 I4 61.848(13) 3_666 3_666 ?
W2 W1 I4 122.002(15) . 3_666 ?
W3 W1 W3 90.521(11) 3_666 . ?
W3 W1 I1 62.126(12) . . ?
W3 W1 I1 122.507(15) 3_666 . ?
W3 W1 I2 62.272(13) 3_666 . ?
W3 W1 I2 122.329(15) . . ?
W3 W1 I3 61.924(12) 3_666 3_666 ?
W3 W1 I3 122.061(14) . 3_666 ?
W3 W1 I4 61.818(13) . 3_666 ?
W3 W1 I4 121.915(15) 3_666 3_666 ?
I1 W1 I2 89.767(15) . . ?
I3 W1 I1 174.701(17) 3_666 . ?
I3 W1 I2 90.187(15) 3_666 . ?
I3 W1 I4 89.621(15) 3_666 3_666 ?
I4 W1 I1 89.952(15) 3_666 . ?
I4 W1 I2 174.874(18) 3_666 . ?
C1 W1 W2 134.51(19) . 3_666 ?
C1 W1 W2 135.47(19) . . ?
C1 W1 W3 133.04(18) . 3_666 ?
C1 W1 W3 136.43(18) . . ?
C1 W1 I1 88.79(17) . . ?
C1 W1 I2 86.4(2) . . ?
C1 W1 I3 85.92(17) . 3_666 ?
C1 W1 I4 88.5(2) . 3_666 ?
W1 W2 W1 90.020(11) . 3_666 ?
W1 W2 W3 60.146(9) 3_666 3_666 ?
W1 W2 W3 60.021(10) 3_666 . ?
W1 W2 W3 60.181(10) . 3_666 ?
W1 W2 W3 60.299(10) . . ?
W1 W2 I1 61.541(12) . . ?
W1 W2 I1 121.911(14) 3_666 . ?
W1 W2 I2 61.644(13) . . ?
W1 W2 I2 122.205(14) 3_666 . ?
W1 W2 I3 61.253(12) 3_666 . ?
W1 W2 I3 121.909(15) . . ?
W1 W2 I4 61.495(13) 3_666 . ?
W1 W2 I4 121.906(14) . . ?
W3 W2 W3 90.539(10) 3_666 . ?
W3 W2 I1 61.894(12) . . ?
W3 W2 I1 121.694(14) 3_666 . ?
W3 W2 I2 62.065(12) 3_666 . ?
W3 W2 I2 121.906(15) . . ?
W3 W2 I3 61.614(12) . . ?
W3 W2 I3 121.366(14) 3_666 . ?
W3 W2 I4 61.730(12) 3_666 . ?
W3 W2 I4 121.483(15) . . ?
I2 W2 I1 89.097(16) . . ?
I3 W2 I1 90.823(15) . . ?
I3 W2 I2 175.718(16) . . ?
I4 W2 I1 175.810(16) . . ?
I4 W2 I2 90.767(16) . . ?
I4 W2 I3 89.000(16) . . ?
O2 W2 W1 131.88(18) . . ?
O2 W2 W1 138.10(18) . 3_666 ?
O2 W2 W3 134.25(17) . . ?
O2 W2 W3 135.06(17) . 3_666 ?
O2 W2 I1 85.39(17) . . ?
O2 W2 I2 85.72(18) . . ?
O2 W2 I3 90.00(18) . . ?
O2 W2 I4 90.43(17) . . ?
W1 W3 W1 89.481(11) 3_666 . ?
W1 W3 W2 59.568(10) 3_666 3_666 ?
W1 W3 W2 59.880(10) 3_666 . ?
W1 W3 I1 61.248(12) . . ?
W1 W3 I1 121.629(15) 3_666 . ?
W1 W3 I2 61.292(13) 3_666 3_666 ?
W1 W3 I2 121.422(14) . 3_666 ?
W1 W3 I3 61.261(12) 3_666 . ?
W1 W3 I3 121.260(15) . . ?
W1 W3 I4 61.357(13) . 3_666 ?
W1 W3 I4 121.181(14) 3_666 3_666 ?
W2 W3 W1 59.823(9) 3_666 . ?
W2 W3 W1 59.504(10) . . ?
W2 W3 W2 89.461(10) 3_666 . ?
W2 W3 I1 61.753(13) . . ?
W2 W3 I1 121.052(14) 3_666 . ?
W2 W3 I2 61.604(12) 3_666 3_666 ?
W2 W3 I2 121.159(15) . 3_666 ?
W2 W3 I3 61.759(12) . . ?
W2 W3 I3 120.815(15) 3_666 . ?
W2 W3 I4 61.618(12) 3_666 3_666 ?
W2 W3 I4 120.849(15) . 3_666 ?
I1 W3 I2 176.589(16) . 3_666 ?
I3 W3 I1 90.824(15) . . ?
I3 W3 I2 89.304(16) . 3_666 ?
I3 W3 I4 176.911(17) . 3_666 ?
I4 W3 I1 89.234(16) 3_666 . ?
I4 W3 I2 90.454(16) 3_666 3_666 ?
O3 W3 W1 134.49(16) . . ?
O3 W3 W1 135.94(16) . 3_666 ?
O3 W3 W2 133.04(14) . 3_666 ?
O3 W3 W2 137.49(14) . . ?
O3 W3 I1 89.29(14) . . ?
O3 W3 I2 87.30(14) . 3_666 ?
O3 W3 I3 90.55(16) . . ?
O3 W3 I4 86.36(16) . 3_666 ?
W1 I1 W2 56.174(11) . . ?
W1 I1 W3 56.626(11) . . ?
W2 I1 W3 56.353(11) . . ?
W1 I2 W2 56.189(11) . . ?
W1 I2 W3 56.436(11) . 3_666 ?
W2 I2 W3 56.331(11) . 3_666 ?
W1 I3 W2 56.683(11) 3_666 . ?
W1 I3 W3 56.814(11) 3_666 . ?
W3 I3 W2 56.628(11) . . ?
W1 I4 W2 56.657(11) 3_666 . ?
W1 I4 W3 56.826(11) 3_666 3_666 ?
W2 I4 W3 56.652(12) . 3_666 ?
N1 C1 W1 177.2(6) . . ?
C2 O2 W2 137.6(6) . . ?
O2 C2 H2A 109.5 . . ?
O2 C2 H2B 109.5 . . ?
O2 C2 H2C 109.5 . . ?
H2A C2 H2B 109.5 . . ?
H2A C2 H2C 109.5 . . ?
H2B C2 H2C 109.5 . . ?
C3 O3 W3 131.8(5) . . ?
O3 C3 H3A 109.5 . . ?
O3 C3 H3B 109.5 . . ?
O3 C3 H3C 109.5 . . ?
H3A C3 H3B 109.5 . . ?
H3A C3 H3C 109.5 . . ?
H3B C3 H3C 109.5 . . ?
C21 N11 C11 111.1(5) . . ?
C31 N11 C11 110.5(5) . . ?
C31 N11 C21 107.2(5) . . ?
C31 N11 C41 111.1(5) . . ?
C41 N11 C11 106.1(5) . . ?
C41 N11 C21 110.8(5) . . ?
N11 C11 H11A 108.6 . . ?
N11 C11 H11B 108.6 . . ?
H11A C11 H11B 107.6 . . ?
C12 C11 N11 114.6(5) . . ?
C12 C11 H11A 108.6 . . ?
C12 C11 H11B 108.6 . . ?
C11 C12 H12A 109.5 . . ?
C11 C12 H12B 109.5 . . ?
C11 C12 C13 110.7(6) . . ?
H12A C12 H12B 108.1 . . ?
C13 C12 H12A 109.5 . . ?
C13 C12 H12B 109.5 . . ?
C12 C13 H13A 109.4 . . ?
C12 C13 H13B 109.4 . . ?
C12 C13 C14 111.0(7) . . ?
H13A C13 H13B 108.0 . . ?
C14 C13 H13A 109.4 . . ?
C14 C13 H13B 109.4 . . ?
C13 C14 H14A 109.5 . . ?
C13 C14 H14B 109.5 . . ?
C13 C14 H14C 109.5 . . ?
H14A C14 H14B 109.5 . . ?
H14A C14 H14C 109.5 . . ?
H14B C14 H14C 109.5 . . ?
N11 C21 H21A 108.4 . . ?
N11 C21 H21B 108.4 . . ?
H21A C21 H21B 107.5 . . ?
C22 C21 N11 115.4(5) . . ?
C22 C21 H21A 108.4 . . ?
C22 C21 H21B 108.4 . . ?
C21 C22 H22A 109.2 . . ?
C21 C22 H22B 109.2 . . ?
C21 C22 C23 111.8(6) . . ?
H22A C22 H22B 107.9 . . ?
C23 C22 H22A 109.2 . . ?
C23 C22 H22B 109.2 . . ?
C22 C23 H23A 109.1 . . ?
C22 C23 H23B 109.1 . . ?
C22 C23 C24 112.6(6) . . ?
H23A C23 H23B 107.8 . . ?
C24 C23 H23A 109.1 . . ?
C24 C23 H23B 109.1 . . ?
C23 C24 H24A 109.5 . . ?
C23 C24 H24B 109.5 . . ?
C23 C24 H24C 109.5 . . ?
H24A C24 H24B 109.5 . . ?
H24A C24 H24C 109.5 . . ?
H24B C24 H24C 109.5 . . ?
N11 C31 H31A 108.5 . . ?
N11 C31 H31B 108.5 . . ?
N11 C31 C32 115.2(5) . . ?
H31A C31 H31B 107.5 . . ?
C32 C31 H31A 108.5 . . ?
C32 C31 H31B 108.5 . . ?
C31 C32 H32A 109.6 . . ?
C31 C32 H32B 109.6 . . ?
C31 C32 C33 110.4(6) . . ?
H32A C32 H32B 108.1 . . ?
C33 C32 H32A 109.6 . . ?
C33 C32 H32B 109.6 . . ?
C32 C33 H33A 109.3 . . ?
C32 C33 H33B 109.3 . . ?
H33A C33 H33B 108.0 . . ?
C34 C33 C32 111.4(7) . . ?
C34 C33 H33A 109.3 . . ?
C34 C33 H33B 109.3 . . ?
C33 C34 H34A 109.5 . . ?
C33 C34 H34B 109.5 . . ?
C33 C34 H34C 109.5 . . ?
H34A C34 H34B 109.5 . . ?
H34A C34 H34C 109.5 . . ?
H34B C34 H34C 109.5 . . ?
N11 C41 H41A 108.5 . . ?
N11 C41 H41B 108.5 . . ?
N11 C41 C42 115.2(5) . . ?
H41A C41 H41B 107.5 . . ?
C42 C41 H41A 108.5 . . ?
C42 C41 H41B 108.5 . . ?
C41 C42 H42A 109.5 . . ?
C41 C42 H42B 109.5 . . ?
C41 C42 C43 110.7(6) . . ?
H42A C42 H42B 108.1 . . ?
C43 C42 H42A 109.5 . . ?
C43 C42 H42B 109.5 . . ?
C42 C43 H43A 109.5 . . ?
C42 C43 H43B 109.5 . . ?
H43A C43 H43B 108.1 . . ?
C44 C43 C42 110.9(7) . . ?
C44 C43 H43A 109.5 . . ?
C44 C43 H43B 109.5 . . ?
C43 C44 H44A 109.5 . . ?
C43 C44 H44B 109.5 . . ?
C43 C44 H44C 109.5 . . ?
H44A C44 H44B 109.5 . . ?
H44A C44 H44C 109.5 . . ?
H44B C44 H44C 109.5 . . ?

_refine_diff_density_max         2.040
_refine_diff_density_min         -1.954
_refine_diff_density_rms         0.199

_shelx_res_file                  
;
TITL pr892 in P2(1)/n; 150K; D8
    pr892.res
    created by SHELXL-2018/3 at 10:34:44 on 21-Aug-2020
CELL 0.71073  9.8189  15.4901  21.8314  90.000  97.512  90.000
ZERR   2.000  0.0003   0.0005   0.0008   0.000   0.001   0.000
LATT 1
SYMM 0.5-X, 0.5+Y, 0.5-Z
SFAC C  H   N O  I  W
UNIT 76 188 8 18 16 12
 
LIST 4 ! automatically inserted. Change 6 to 4 for CHECKCIF!!
TEMP -123
 
L.S. 8
FMAP 2
BOND $H
PLAN 5
 
OMIT 0
 
OMIT -8 0 22
 
OMIT  0   1   1
OMIT  0   3   3
OMIT  0   1   2
 
SHEL 99999 0.77
 
ACTA 51
 
SIMU 0.01 0.01 O3W O4W
 
FREE O3W O4W
 
SIZE 0.12 0.05 0.05
 
WGHT    0.010300   23.962999
FVAR       0.10018
W1    6    0.530356    0.466491    0.420000    11.00000    0.02616    0.01553 =
         0.02236    0.00138    0.00209   -0.00074
W2    6    0.651156    0.575451    0.504044    11.00000    0.02095    0.01590 =
         0.02599    0.00261    0.00004   -0.00332
W3    6    0.381968    0.589909    0.465971    11.00000    0.02153    0.01495 =
         0.02475    0.00313    0.00089    0.00022
I1    5    0.568098    0.637695    0.383043    11.00000    0.03249    0.01992 =
         0.03078    0.00672    0.00697   -0.00138
I2    5    0.815466    0.450430    0.454320    11.00000    0.02528    0.03136 =
         0.04114    0.00789    0.00895    0.00369
I3    5    0.504156    0.708652    0.554324    11.00000    0.03913    0.01489 =
         0.02940   -0.00136    0.00475   -0.00137
I4    5    0.750245    0.521852    0.624957    11.00000    0.03226    0.02688 =
         0.02990    0.00493   -0.00921   -0.00524
C1    1    0.567737    0.423521    0.327855    11.00000    0.04078    0.01913 =
         0.02994    0.00891    0.00428    0.00176
N1    3    0.586284    0.397530    0.280175    11.00000    0.05388    0.02744 =
         0.02801   -0.00063    0.00998    0.00122
O2    4    0.816381    0.656332    0.503656    11.00000    0.04172    0.05096 =
         0.06132    0.01363    0.00632   -0.01937
C2    1    0.878912    0.716843    0.539497    11.00000    0.04372    0.04176 =
         0.04713   -0.00578   -0.00802    0.00038
AFIX 137
H2A   2    0.963307    0.734357    0.523376    11.00000   -1.50000
H2B   2    0.901846    0.694248    0.581508    11.00000   -1.50000
H2C   2    0.818010    0.766854    0.540217    11.00000   -1.50000
AFIX   0
O3    4    0.248812    0.683112    0.427927    11.00000    0.03089    0.02941 =
         0.04701    0.01405   -0.00242    0.00637
C3    1    0.265544    0.769902    0.418816    11.00000    0.05638    0.02497 =
         0.04271    0.00257   -0.00742    0.00655
AFIX 137
H3A   2    0.183863    0.792894    0.393461    11.00000   -1.50000
H3B   2    0.346381    0.779282    0.397655    11.00000   -1.50000
H3C   2    0.278338    0.799520    0.458822    11.00000   -1.50000
AFIX   0
N11   3    0.207300    0.869642    0.673667    11.00000    0.01647    0.02730 =
         0.02183   -0.00421    0.00290   -0.00219
C11   1    0.242084    0.894708    0.609990    11.00000    0.02350    0.02942 =
         0.02158   -0.00233    0.00517   -0.00319
AFIX  23
H11A  2    0.307214    0.851692    0.597043    11.00000   -1.20000
H11B  2    0.157151    0.891838    0.580137    11.00000   -1.20000
AFIX   0
C12   1    0.304384    0.983841    0.606559    11.00000    0.02847    0.02798 =
         0.02975    0.00153    0.00647    0.00006
AFIX  23
H12A  2    0.394654    0.985658    0.632713    11.00000   -1.20000
H12B  2    0.243828    1.027100    0.622625    11.00000   -1.20000
AFIX   0
C13   1    0.322659    1.006172    0.540324    11.00000    0.06833    0.04331 =
         0.03863   -0.00350    0.01819   -0.02536
AFIX  23
H13A  2    0.233619    0.999918    0.513632    11.00000   -1.20000
H13B  2    0.388692    0.965460    0.525366    11.00000   -1.20000
AFIX   0
C14   1    0.375212    1.098414    0.535698    11.00000    0.07425    0.03656 =
         0.05830    0.00813    0.02898   -0.01808
AFIX 137
H14A  2    0.385932    1.111279    0.492637    11.00000   -1.50000
H14B  2    0.464163    1.104358    0.561522    11.00000   -1.50000
H14C  2    0.309271    1.138804    0.549964    11.00000   -1.50000
AFIX   0
C21   1    0.331828    0.878502    0.722417    11.00000    0.02571    0.02523 =
         0.01792   -0.00412   -0.00048   -0.00408
AFIX  23
H21A  2    0.356844    0.940354    0.726344    11.00000   -1.20000
H21B  2    0.305713    0.859556    0.762596    11.00000   -1.20000
AFIX   0
C22   1    0.456951    0.828281    0.710139    11.00000    0.02429    0.01946 =
         0.03458   -0.00294    0.00095   -0.00015
AFIX  23
H22A  2    0.481541    0.844612    0.669136    11.00000   -1.20000
H22B  2    0.435243    0.765844    0.709181    11.00000   -1.20000
AFIX   0
C23   1    0.578483    0.845019    0.758963    11.00000    0.03341    0.04050 =
         0.02311   -0.00020   -0.00273    0.00101
AFIX  23
H23A  2    0.550406    0.834911    0.800304    11.00000   -1.20000
H23B  2    0.606210    0.906277    0.756802    11.00000   -1.20000
AFIX   0
C24   1    0.701022    0.787809    0.751294    11.00000    0.03412    0.04385 =
         0.05738    0.00576   -0.01053    0.01020
AFIX 137
H24A  2    0.778714    0.803804    0.782057    11.00000   -1.50000
H24B  2    0.726585    0.795481    0.709722    11.00000   -1.50000
H24C  2    0.676717    0.727282    0.757163    11.00000   -1.50000
AFIX   0
C31   1    0.096554    0.928212    0.692606    11.00000    0.02086    0.02607 =
         0.02969   -0.00122    0.00736    0.00292
AFIX  23
H31A  2    0.131669    0.988193    0.694717    11.00000   -1.20000
H31B  2    0.079047    0.911723    0.734688    11.00000   -1.20000
AFIX   0
C32   1   -0.039158    0.926500    0.650125    11.00000    0.02790    0.03715 =
         0.03268   -0.00286    0.01215   -0.00127
AFIX  23
H32A  2   -0.074372    0.866586    0.646407    11.00000   -1.20000
H32B  2   -0.024638    0.946654    0.608435    11.00000   -1.20000
AFIX   0
C33   1   -0.144421    0.984461    0.675613    11.00000    0.02351    0.05029 =
         0.03325    0.00055    0.00540    0.00163
AFIX  23
H33A  2   -0.160267    0.963308    0.716886    11.00000   -1.20000
H33B  2   -0.107650    1.043926    0.680482    11.00000   -1.20000
AFIX   0
C34   1   -0.278618    0.985731    0.633482    11.00000    0.02765    0.07460 =
         0.04018    0.00251    0.00086    0.01260
AFIX 137
H34A  2   -0.343790    1.023401    0.651009    11.00000   -1.50000
H34B  2   -0.316039    0.927070    0.629216    11.00000   -1.50000
H34C  2   -0.263395    1.007548    0.592792    11.00000   -1.50000
AFIX   0
C41   1    0.158850    0.776568    0.668368    11.00000    0.02814    0.02127 =
         0.02724   -0.00518    0.00360   -0.00562
AFIX  23
H41A  2    0.236230    0.740067    0.658949    11.00000   -1.20000
H41B  2    0.085065    0.772036    0.632988    11.00000   -1.20000
AFIX   0
C42   1    0.105380    0.740495    0.725350    11.00000    0.03510    0.01801 =
         0.03372    0.00005    0.00492   -0.00425
AFIX  23
H42A  2    0.028551    0.776741    0.735712    11.00000   -1.20000
H42B  2    0.179370    0.742121    0.760791    11.00000   -1.20000
AFIX   0
C43   1    0.056102    0.648138    0.714311    11.00000    0.04378    0.03133 =
         0.04783   -0.00016    0.00915   -0.01865
AFIX  23
H43A  2   -0.011269    0.645653    0.676425    11.00000   -1.20000
H43B  2    0.134925    0.610826    0.707982    11.00000   -1.20000
AFIX   0
C44   1   -0.009872    0.614912    0.768581    11.00000    0.03884    0.02533 =
         0.04585    0.01270    0.00712   -0.00111
AFIX 137
H44A  2   -0.036884    0.554486    0.761351    11.00000   -1.50000
H44B  2   -0.091332    0.649622    0.773233    11.00000   -1.50000
H44C  2    0.055865    0.619104    0.806314    11.00000   -1.50000
AFIX   0
O1W   4   -0.039260    0.679343    0.398892    11.00000    0.05731    0.04869 =
         0.04325    0.01210    0.01464    0.00175
O2W   4   -0.112925    0.841772    0.349397    10.75000    0.05898    0.02788 =
         0.03689    0.01128    0.02632    0.02034
O3W   4   -0.005073    1.094597    0.518363    10.50000    0.06423    0.07720 =
         0.02632    0.01104   -0.01876    0.01988
O4W   4   -0.001433    1.092002    0.541901    10.25000    0.06557    0.07075 =
         0.02179    0.01245   -0.02074    0.01780
HKLF 4
 
 
 
 
REM  pr892 in P2(1)/n; 150K; D8
REM wR2 = 0.0604, GooF = S = 1.046, Restrained GooF = 1.045 for all data
REM R1 = 0.0308 for 6533 Fo > 4sig(Fo) and 0.0378 for all 7549 data
REM 313 parameters refined using 6 restraints
 
END
 
WGHT      0.0103     23.9626
 
REM Highest difference peak  2.040,  deepest hole -1.954,  1-sigma level  0.199
Q1    1   0.8147  0.4675  0.4894  11.00000  0.05    2.04
Q2    1   0.6959  0.5268  0.6495  11.00000  0.05    1.95
Q3    1   0.6298  0.5900  0.5305  11.00000  0.05    1.87
Q4    1   0.5810  0.6759  0.4080  11.00000  0.05    1.18
Q5    1  -0.1619  0.8596  0.3338  11.00000  0.05    1.12
;
_shelx_res_checksum              72316

_shelx_hkl_file                  
;
  -1   0   0 0.37000 0.60610   3
  -1   0   0 0.70394 0.54258   1
  -2   0   0 234.742 11.7651   3
   2   0   0 255.462 11.2232   1
   2   0   0 258.263 10.4538   2
   2   0   0 246.267 11.9550   3
  -2   0   0 275.974 11.5328   1
  -3   0   0 2.92307 2.06662   3
   3   0   0 2.01074 1.90044   1
   3   0   0 -0.8175 1.16205   3
  -3   0   0 0.51024 1.26024   1
   3   0   0 4.04560 1.76466   2
   4   0   0 12.0788 3.60898   1
  -4   0   0 9.60865 3.25271   1
   4   0   0 12.7578 3.23259   2
   4   0   0 13.5889 3.30963   2
   4   0   0 10.5218 3.78739   3
   5   0   0 1.36441 1.42265   2
   5   0   0 1.54685 2.05847   1
   5   0   0 -1.7467 0.85415   3
   5   0   0 2.75688 2.01727   2
  -5   0   0 -2.3102 1.11530   1
   6   0   0 221.918 15.7356   1
   6   0   0 212.305 13.9746   2
   6   0   0 233.772 13.8636   2
   6   0   0 256.164 18.2183   3
  -6   0   0 266.179 16.6622   1
   7   0   0 6.70849 4.14501   1
   7   0   0 2.64244 2.83792   2
  -7   0   0 -0.6171 2.55890   1
   7   0   0 -1.3111 3.93735   3
   7   0   0 1.20023 2.12204   2
   8   0   0 239.831 15.8465   2
   8   0   0 229.264 20.4311   3
   8   0   0 263.293 17.3664   2
  -8   0   0 267.267 19.4154   1
   8   0   0 263.017 19.5329   1
   9   0   0 0.21418 1.92089   2
   9   0   0 2.01559 3.13259   1
   9   0   0 -0.9645 1.35388   3
   9   0   0 -1.8985 1.36100   2
  10   0   0 96.9782 16.0998   1
  10   0   0 96.4221 14.1434   2
  10   0   0 105.065 11.1234   2
  10   0   0 76.1621 15.3069   3
  11   0   0 0.44214 3.84738   3
  11   0   0 -2.3451 2.66841   2
  11   0   0 5.41195 4.38386   2
  11   0   0 2.07706 4.88650   1
  12   0   0 1.18793 3.53072   1
  12   0   0 1.00083 2.66113   2
  12   0   0 -1.4959 2.23944   3
  12   0   0 2.42042 3.41633   2
  13   0   0 1.85583 2.86387   2
  13   0   0 11.0788 5.95063   2
  13   0   0 0.35939 3.97066   3
  13   0   0 -2.3448 2.34103   1
   0  -1   0 -0.0647 0.12671   3
   0   1   0 0.01098 0.12659   1
  -1  -1   0 4640.94 144.474   4
   1  -1   0 4804.22 144.638   4
  -1  -1   0 4743.50 144.763   4
  -1   1   0 4846.76 143.682   4
  -1   1   0 4784.37 144.206   4
   1   1   0 4740.10 145.141   4
   2  -1   0 77.3934 4.77096   1
  -2  -1   0 80.3930 5.92578   1
   2  -1   0 79.2921 5.22070   2
  -2  -1   0 85.2995 5.39101   3
   2  -1   0 89.0004 6.88401   3
  -2  -1   0 84.7486 5.04754   2
  -2   1   0 85.9680 5.37274   2
   2   1   0 87.1421 5.11362   2
   2   1   0 75.1733 5.11710   3
   2   1   0 72.1751 5.65828   1
  -2   1   0 82.1854 6.61762   3
  -2   1   0 83.7758 4.89022   1
   3  -1   0 173.965 11.5524   3
   3  -1   0 169.410 9.17361   1
  -3  -1   0 158.488 8.69958   2
  -3  -1   0 160.316 10.2053   1
   3  -1   0 158.939 9.08625   2
   3   1   0 175.066 8.90306   2
   3   1   0 155.547 10.1086   1
  -3   1   0 186.476 11.8886   3
   3   1   0 147.951 9.43458   3
  -3   1   0 173.601 9.21174   1
  -4  -1   0 53.0104 7.66218   1
   4  -1   0 39.5663 4.61369   2
   4  -1   0 46.4076 5.35467   1
  -4  -1   0 50.0895 5.08082   2
   4  -1   0 42.5156 7.54926   3
   4  -1   0 42.0393 6.11148   2
  -4   1   0 40.7610 7.85258   3
  -4   1   0 45.1843 5.31730   1
   4   1   0 51.5767 7.54321   3
   4   1   0 54.7928 8.19274   1
   4   1   0 57.8984 5.30809   2
  -5  -1   0 362.723 20.4237   1
   5  -1   0 395.657 19.6638   1
   5  -1   0 421.332 23.4635   3
   5  -1   0 377.451 18.2945   2
   5  -1   0 402.710 19.1660   2
   5   1   0 391.678 21.0188   1
   5   1   0 395.371 21.0723   3
   5   1   0 384.028 18.0575   2
  -5   1   0 383.463 19.3493   1
   6  -1   0 96.7149 8.42034   2
   6  -1   0 78.1399 11.0944   1
   6  -1   0 91.8499 8.65155   2
   6  -1   0 105.978 11.7420   3
  -6  -1   0 81.4252 12.1122   1
  -6   1   0 77.4776 8.52904   1
   6   1   0 81.8580 7.68054   2
   6   1   0 79.9610 12.2279   1
   6   1   0 69.3328 10.8299   3
   7  -1   0 498.215 30.5995   3
   7  -1   0 513.396 25.3099   2
   7  -1   0 512.021 26.7355   1
  -7  -1   0 482.802 27.4363   1
   7  -1   0 503.337 24.1985   2
   7   1   0 485.266 24.7191   2
   7   1   0 504.416 28.0870   1
  -7   1   0 522.590 26.6861   1
   7   1   0 485.437 23.7258   2
   7   1   0 557.328 29.8751   3
  -8  -1   0 26.8903 7.61217   1
   8  -1   0 29.5302 7.25753   2
   8  -1   0 13.5959 4.72153   2
   8  -1   0 15.8027 6.01000   1
   8  -1   0 19.5330 7.96013   3
   8   1   0 35.0856 7.82415   2
   8   1   0 14.2465 6.10285   1
   8   1   0 26.9745 6.14714   2
   8   1   0 23.4035 7.68190   3
   9  -1   0 12.5053 4.57065   2
  -9  -1   0 9.92334 5.04732   1
   9  -1   0 15.8612 6.24305   1
   9  -1   0 18.4799 5.91547   2
   9  -1   0 13.2451 7.19900   3
   9   1   0 12.1730 5.58623   1
   9   1   0 18.0525 5.31892   2
   9   1   0 9.91821 4.26638   2
   9   1   0 14.6341 6.22038   3
  10  -1   0 130.277 21.8761   3
  10  -1   0 138.917 15.4073   1
  10  -1   0 119.468 12.1402   2
  10  -1   0 132.305 13.4947   2
  10   1   0 138.157 16.2457   1
  10   1   0 153.596 13.4854   2
  10   1   0 132.022 13.3480   2
  10   1   0 164.822 17.9456   3
  11  -1   0 230.201 17.8747   2
  11  -1   0 200.473 20.0836   1
  11  -1   0 243.209 19.4517   2
  11  -1   0 258.175 25.9415   3
  11   1   0 237.442 17.9395   2
  11   1   0 256.830 19.7392   2
  11   1   0 235.035 23.1922   3
  11   1   0 282.438 24.6783   1
  12  -1   0 46.7876 12.1925   1
  12  -1   0 45.7696 12.6419   1
  12  -1   0 51.2350 9.95894   2
  12  -1   0 60.1258 15.4193   3
  12  -1   0 57.5385 11.9424   2
  12   1   0 53.9261 14.0828   3
  12   1   0 65.8959 11.3270   2
  12   1   0 65.9935 12.0785   2
  13  -1   0 0.71914 3.85431   3
  13  -1   0 1.96086 3.22697   2
  13  -1   0 9.00892 6.41301   1
  13  -1   0 -0.3678 2.43529   2
  13   1   0 1.61655 2.85162   2
  13   1   0 2.28907 3.96980   3
  13   1   0 5.20107 4.53713   2
   0  -2   0 4340.22 137.730   4
   0  -2   0 4368.22 145.878   4
   0   2   0 4318.88 137.311   4
   0   2   0 4444.66 140.866   4
  -1  -2   0 20.2638 2.46095   2
  -1  -2   0 16.4735 2.61950   1
   1  -2   0 18.7678 3.07972   2
   1  -2   0 28.8127 4.45101   3
   1   2   0 19.5773 2.99465   2
  -1   2   0 16.5342 2.81951   2
   1   2   0 17.7400 2.92895   1
  -1   2   0 23.4464 4.02175   3
  -2  -2   0 699.710 27.2193   1
   2  -2   0 746.498 29.1156   3
   2  -2   0 714.929 26.2965   2
   2   2   0 744.569 27.5234   1
  -2   2   0 723.812 28.7705   3
  -2   2   0 713.762 26.3234   2
  -3  -2   0 91.3874 7.75337   1
   3  -2   0 70.8694 5.10578   1
   3  -2   0 69.8183 6.08889   2
   3  -2   0 76.9719 8.01004   3
  -3  -2   0 71.2634 5.75091   2
  -3   2   0 76.6690 6.33658   2
  -3   2   0 77.3684 5.30295   1
   3   2   0 82.3106 6.06301   2
   3   2   0 87.4238 7.60111   1
  -3   2   0 78.1361 8.01007   3
   3   2   0 82.3994 5.81630   3
   4  -2   0 24.2340 6.58571   3
  -4  -2   0 26.0925 5.46276   1
   4  -2   0 28.9582 5.28359   2
  -4  -2   0 27.7244 4.71483   2
   4  -2   0 23.8110 4.36219   1
  -4   2   0 25.8737 4.89327   2
   4   2   0 20.8848 4.87443   1
   4   2   0 23.1922 4.61507   3
   4   2   0 33.1842 5.27561   2
  -4   2   0 18.2105 5.67416   3
  -4   2   0 29.1964 4.75521   1
  -5  -2   0 8.10001 4.02857   1
  -5  -2   0 10.8949 3.55401   2
   5  -2   0 7.24461 4.30122   3
   5  -2   0 7.09676 3.12004   2
   5  -2   0 13.5510 3.80454   1
   5   2   0 7.11748 3.26954   3
  -5   2   0 16.1013 4.30670   1
   5   2   0 5.72694 3.49200   1
   5   2   0 6.36886 2.66323   2
   6  -2   0 24.9721 5.89289   2
   6  -2   0 24.1916 5.78565   1
   6  -2   0 19.2024 4.92974   2
  -6  -2   0 11.4283 5.39707   1
   6  -2   0 36.0882 9.37026   3
   6   2   0 28.0150 5.90800   2
  -6   2   0 21.3840 5.58188   1
   6   2   0 17.2226 5.16960   3
   6   2   0 16.8452 5.63985   1
   7  -2   0 79.4043 8.59670   2
   7  -2   0 79.1166 8.99249   1
   7  -2   0 80.3414 11.3337   2
  -7  -2   0 90.4880 13.8003   1
   7  -2   0 86.7398 15.2781   3
   7   2   0 63.4269 11.1195   3
   7   2   0 54.8576 8.60040   2
   7   2   0 83.8555 14.0603   1
   8  -2   0 18.4642 5.88246   2
   8  -2   0 10.2772 5.87635   3
   8  -2   0 13.7567 6.52106   1
   8  -2   0 26.6676 6.62813   2
  -8  -2   0 12.9592 6.42460   1
   8   2   0 16.0985 6.24630   3
   8   2   0 20.0951 7.45775   1
   8   2   0 16.3406 5.17064   2
   8   2   0 0.77218 2.24406   2
   9  -2   0 14.3765 5.11760   2
   9  -2   0 4.12015 3.29914   2
  -9  -2   0 -0.1844 3.88530   1
   9  -2   0 -0.3794 2.93370   1
   9  -2   0 14.8650 7.43606   3
   9   2   0 -0.6892 2.66133   1
   9   2   0 9.14460 4.65685   2
   9   2   0 1.11301 2.47678   2
   9   2   0 2.35828 3.04204   3
  10  -2   0 173.855 16.7002   1
  10  -2   0 162.684 14.2763   2
  10  -2   0 156.629 15.1080   2
  10  -2   0 153.787 19.5217   3
  10   2   0 186.936 14.9405   2
  10   2   0 168.838 26.8334   1
  10   2   0 173.837 18.1355   3
  10   2   0 178.144 15.6995   2
  11  -2   0 470.065 31.1529   1
  11  -2   0 460.393 27.1624   2
  11  -2   0 468.519 28.8984   2
  11  -2   0 458.636 37.0927   3
  11   2   0 477.909 34.6239   1
  11   2   0 528.232 28.4309   2
  11   2   0 536.802 30.0973   2
  11   2   0 574.328 35.7646   3
  12  -2   0 2.69957 4.93497   1
  12  -2   0 24.5358 7.29003   2
  12  -2   0 8.05548 5.94959   1
  12  -2   0 7.97299 4.22004   2
  12  -2   0 11.8418 8.03512   3
  12   2   0 16.5112 6.34000   2
  12   2   0 15.4474 5.97362   2
  13  -2   0 4.39211 4.25901   2
  13  -2   0 9.59512 6.27392   1
  13  -2   0 6.78805 6.99368   3
  13  -2   0 10.3663 5.30603   2
  13   2   0 6.90086 5.71018   3
  13   2   0 6.70154 4.69696   2
  13   2   0 9.42268 5.15407   2
   0  -3   0 -0.2889 0.62493   1
   0  -3   0 1.27196 1.12248   2
   0  -3   0 0.06026 0.87088   3
   0   3   0 0.43336 0.86433   3
   0   3   0 1.36011 0.93462   1
   0   3   0 0.18407 0.90371   2
  -1  -3   0 4.11548 2.00270   1
   1  -3   0 41.9317 5.93127   3
   1  -3   0 3.11716 0.82119   1
   1  -3   0 3.25932 1.74422   2
  -1  -3   0 2.67369 0.78378   3
  -1  -3   0 0.75235 1.08604   2
   1   3   0 3.05437 1.70534   2
  -1   3   0 3.05747 1.79231   3
  -1   3   0 3.69444 0.83764   1
  -1   3   0 4.89025 2.10212   2
   1   3   0 3.29049 1.65050   1
  -2  -3   0 50.9292 4.91317   2
   2  -3   0 56.0187 6.44973   3
  -2  -3   0 50.5093 5.44434   1
   2  -3   0 42.1700 4.78807   2
   2   3   0 44.1913 4.62090   2
  -2   3   0 57.1976 8.75182   3
   2   3   0 48.8344 5.37309   1
  -2   3   0 53.8248 5.36257   2
   3  -3   0 156.849 12.5291   3
   3  -3   0 170.136 10.7199   2
   3  -3   0 171.194 7.83244   1
  -3  -3   0 182.428 12.0241   1
  -3  -3   0 168.779 10.0895   2
  -3   3   0 188.242 13.4250   3
   3   3   0 196.929 10.7012   2
   3   3   0 169.765 8.12552   3
  -3   3   0 162.056 10.5687   2
   3   3   0 166.428 11.5585   1
  -4  -3   0 1012.93 41.0955   1
   4  -3   0 1061.12 44.1456   3
   4  -3   0 996.685 35.1393   1
   4  -3   0 1015.09 38.6889   2
  -4  -3   0 1063.50 37.9088   2
   4   3   0 1042.83 41.2772   1
   4   3   0 1027.39 37.7018   2
  -4   3   0 974.116 38.4187   2
  -4   3   0 1003.19 43.2411   3
   4   3   0 1015.93 36.1427   3
   5  -3   0 6.13054 4.04217   3
  -5  -3   0 5.30308 2.69703   2
   5  -3   0 5.16740 2.40789   1
   5  -3   0 4.23450 2.66409   2
  -5  -3   0 -0.0577 1.98479   1
   5   3   0 5.30787 2.76492   2
   5   3   0 6.91860 2.92612   3
   5   3   0 6.38063 3.77133   1
  -5   3   0 6.58759 3.14892   2
  -6  -3   0 32.8302 6.39043   2
  -6  -3   0 28.7009 7.82859   1
   6  -3   0 29.6164 6.50527   2
   6  -3   0 41.1001 6.84447   1
   6  -3   0 21.2598 6.93608   3
   6   3   0 23.4360 7.16400   1
   6   3   0 25.8299 5.93286   2
   6   3   0 28.5762 6.34224   3
  -7  -3   0 75.5092 13.1342   1
   7  -3   0 57.1410 12.1906   3
   7  -3   0 75.2356 11.2029   2
  -7  -3   0 77.4511 12.0042   2
   7  -3   0 78.5452 8.57865   1
   7  -3   0 67.8922 10.0846   2
   7   3   0 63.9250 7.62913   2
   7   3   0 70.5307 11.7754   1
   7   3   0 73.2421 9.00361   3
   8  -3   0 52.0793 13.4437   3
   8  -3   0 59.4785 10.0640   2
   8  -3   0 56.9093 9.91072   2
  -8  -3   0 61.9605 12.5442   1
   8  -3   0 59.8419 10.3052   1
   8   3   0 51.0302 9.98939   3
   8   3   0 22.7098 8.19277   1
   8   3   0 52.1728 8.97236   2
   9  -3   0 15.3410 5.68708   2
  -9  -3   0 8.24515 6.67833   1
   9  -3   0 14.6091 7.14271   3
   9  -3   0 15.1714 6.67242   2
   9  -3   0 11.0387 5.43775   1
   9   3   0 17.1571 6.51162   3
   9   3   0 9.19444 4.35632   2
   9   3   0 -2.1719 3.17054   1
  10  -3   0 395.686 33.5988   3
  10  -3   0 456.679 27.7645   1
  10  -3   0 438.422 28.0233   1
  10  -3   0 453.242 26.0593   2
  10  -3   0 467.346 27.6676   2
 -10  -3   0 476.790 32.9789   1
  10   3   0 446.180 32.0500   1
  10   3   0 452.164 25.6262   2
  10   3   0 444.880 27.0424   2
  10   3   0 479.123 30.0758   3
  11  -3   0 87.7208 14.9922   1
  11  -3   0 64.9668 14.1500   1
  11  -3   0 99.8162 14.7235   2
  11  -3   0 111.133 21.7339   3
  11  -3   0 107.770 16.2838   2
  11   3   0 95.0798 11.5686   2
  11   3   0 97.5050 16.1014   3
  11   3   0 104.230 15.2083   2
  12  -3   0 199.475 17.8927   2
  12  -3   0 149.399 26.0047   3
  12  -3   0 169.459 15.7631   2
  12  -3   0 193.047 19.0780   1
  12  -3   0 175.488 18.9359   1
  12   3   0 204.206 17.8483   2
  12   3   0 186.344 16.0883   2
  12   3   0 194.032 20.2449   3
  13  -3   0 18.0589 7.60889   1
  13  -3   0 22.7593 7.83586   2
  13  -3   0 8.93652 7.93567   2
  13  -3   0 16.1715 9.21001   3
  13  -3   0 13.6566 7.20318   1
  13   3   0 10.4080 4.97171   2
  13   3   0 11.0330 7.15664   3
   0  -4   0 0.59280 1.38237   2
   0  -4   0 2.14945 1.42606   1
   0  -4   0 0.87435 1.35976   3
   0   4   0 0.92615 1.15847   1
   0   4   0 0.26465 1.26009   3
   0   4   0 1.33945 1.69809   2
  -1  -4   0 49.5705 5.18212   2
  -1  -4   0 45.9482 3.32142   3
   1  -4   0 59.0415 6.12390   3
   1  -4   0 59.4404 5.84524   2
  -1  -4   0 43.9648 4.86401   1
   1  -4   0 47.9232 3.16346   1
   1   4   0 50.0348 5.01163   1
   1   4   0 55.5633 5.52491   2
  -1   4   0 50.0630 5.45097   2
  -1   4   0 54.2454 3.32773   1
  -1   4   0 48.6023 5.63308   3
   2  -4   0 175.545 12.5394   3
  -2  -4   0 178.431 11.4741   1
  -2  -4   0 182.464 10.8934   2
   2  -4   0 179.391 11.2161   2
  -2   4   0 192.337 11.6634   2
   2   4   0 171.641 10.5484   2
  -2   4   0 190.016 12.8875   3
   2   4   0 177.724 11.3337   1
  -3  -4   0 952.024 35.4451   2
   3  -4   0 955.191 36.3672   2
   3  -4   0 902.836 39.5538   3
  -3  -4   0 916.596 37.4585   1
  -3   4   0 947.557 36.5557   2
   3   4   0 886.002 34.8575   2
  -3   4   0 965.679 40.0514   3
   3   4   0 950.465 37.5744   1
   4  -4   0 2222.39 82.4302   3
  -4   4   0 2322.65 82.7610   3
  -4   4   0 2232.30 76.9883   2
   5  -4   0 210.198 17.9634   3
  -5  -4   0 221.465 16.5716   1
   5  -4   0 242.161 15.2615   2
   5  -4   0 236.519 11.7738   1
  -5  -4   0 204.805 13.5025   2
   5   4   0 224.478 16.5898   1
  -5   4   0 209.761 14.4718   2
   5   4   0 225.359 13.9939   2
   5   4   0 193.438 11.4530   3
   6  -4   0 128.768 14.6158   3
  -6  -4   0 163.958 11.8954   2
   6  -4   0 145.887 9.90926   1
  -6  -4   0 113.776 12.5787   1
   6   4   0 123.855 10.5725   2
   6   4   0 138.344 13.6335   1
   6   4   0 139.722 10.3412   3
  -6   4   0 123.299 11.2360   2
  -7  -4   0 215.957 18.2312   1
   7  -4   0 173.242 12.4690   1
  -7  -4   0 203.691 14.3726   2
   7  -4   0 148.642 13.5293   2
   7  -4   0 181.229 18.9335   3
   7   4   0 169.580 13.3508   2
   7   4   0 201.976 14.0640   3
   7   4   0 195.687 17.5274   1
   8  -4   0 42.8615 8.91466   2
   8  -4   0 21.4119 6.40569   2
   8  -4   0 29.5277 6.92607   1
  -8  -4   0 51.0219 12.1793   1
  -8  -4   0 41.0348 8.43843   2
   8  -4   0 38.8978 10.7172   3
   8  -4   0 31.9125 7.19707   1
   8   4   0 47.5640 8.80207   2
   8   4   0 37.0231 11.2574   1
   9  -4   0 36.6147 8.42185   2
   9  -4   0 28.1348 7.31083   1
   9  -4   0 34.0053 8.30873   2
   9  -4   0 26.8855 10.1892   3
   9  -4   0 22.1683 6.86064   1
  -9  -4   0 29.7279 9.38545   1
   9   4   0 35.0789 10.2586   1
   9   4   0 29.8630 8.03347   3
   9   4   0 41.9258 8.97788   2
 -10  -4   0 5.17435 4.69562   1
  10  -4   0 1.31324 4.07904   2
  10  -4   0 9.20221 4.67728   2
  10  -4   0 -1.3749 2.86546   1
  10  -4   0 11.4960 5.18270   1
  10  -4   0 3.25685 4.11418   3
  10   4   0 5.23351 3.34024   2
  10   4   0 6.60747 5.12227   3
  10   4   0 -1.5771 1.95825   1
  10   4   0 -6.0616 3.17839   2
  11  -4   0 498.544 28.9802   2
  11  -4   0 505.718 40.2345   3
  11  -4   0 458.490 28.7931   1
  11  -4   0 505.594 30.4082   1
  11  -4   0 452.671 29.2227   2
  11   4   0 543.044 31.2030   2
  11   4   0 505.956 28.5960   2
  11   4   0 520.776 31.6773   3
  12  -4   0 18.8634 6.79123   2
  12  -4   0 27.9238 9.55389   1
  12  -4   0 7.17369 4.76635   1
  12  -4   0 6.19431 4.66049   2
  12  -4   0 3.33626 5.42130   3
  12   4   0 10.9741 4.85942   2
  12   4   0 15.0560 6.41882   2
  12   4   0 15.8610 6.72552   3
  13  -4   0 3.68499 3.51922   2
  13  -4   0 2.40679 5.29513   3
  13   4   0 3.17070 3.03829   2
  13   4   0 3.01827 4.10383   3
   0  -5   0 -0.3838 0.85000   1
   0  -5   0 1.28054 1.76889   2
   0  -5   0 0.96098 1.40649   3
   0   5   0 1.47165 1.54896   3
   0   5   0 -0.0776 1.26798   2
   0   5   0 2.37105 1.52606   1
  -1  -5   0 178.870 10.8019   1
   1  -5   0 161.931 11.1582   2
  -1  -5   0 179.028 8.50731   3
   1  -5   0 160.863 11.3175   3
  -1  -5   0 172.835 11.1268   2
   1  -5   0 172.592 7.91183   1
  -1   5   0 152.995 11.1188   3
   1   5   0 161.886 10.2937   1
  -1   5   0 176.107 7.93195   1
   1   5   0 170.976 11.0884   2
  -1   5   0 169.617 11.2968   2
   2  -5   0 16.5587 4.72374   3
  -2  -5   0 25.2397 5.60085   1
  -2  -5   0 27.3161 5.58622   2
   2  -5   0 22.3909 4.89020   2
   2   5   0 24.7161 5.16341   2
  -2   5   0 24.3752 5.50453   3
  -2   5   0 22.3890 5.28251   2
   2   5   0 18.5342 4.58134   1
  -3  -5   0 2397.79 85.1739   1
  -3   5   0 2609.94 88.8951   3
   4  -5   0 2535.35 90.2819   3
  -4  -5   0 2388.86 82.3845   2
   4   5   0 2419.06 85.8997   1
   4   5   0 2439.72 82.2273   2
  -4   5   0 2469.93 89.5089   3
  -5  -5   0 998.817 44.3851   1
  -5  -5   0 1071.25 40.9284   2
   5  -5   0 1010.61 34.3740   1
   5  -5   0 968.004 47.0905   3
   5  -5   0 962.108 44.3059   2
   5  -5   0 1006.07 34.2415   1
  -5   5   0 1052.79 42.4546   2
   5   5   0 958.284 39.8204   2
   5   5   0 968.391 43.8592   1
   5   5   0 1029.98 34.5462   3
   6  -5   0 177.881 10.2871   1
   6  -5   0 170.059 13.9075   2
   6  -5   0 168.061 17.3619   3
  -6  -5   0 153.482 12.6751   2
   6  -5   0 177.596 10.4120   1
  -6  -5   0 190.895 16.5740   1
  -6   5   0 171.433 14.0605   2
   6   5   0 169.978 12.9818   2
   6   5   0 155.734 15.1288   1
   6   5   0 163.061 10.3516   3
   7  -5   0 4.52338 2.69398   1
   7  -5   0 2.83428 2.59970   1
   7  -5   0 1.98460 4.70465   3
   7  -5   0 6.43855 4.06210   2
  -7  -5   0 7.44126 4.35792   2
  -7  -5   0 -1.4935 2.81837   1
   7   5   0 10.8336 4.75113   2
   7   5   0 5.36097 3.34141   3
   7   5   0 0.85276 3.24449   1
  -8  -5   0 14.3485 5.53562   2
   8  -5   0 8.86923 3.85272   1
   8  -5   0 16.8617 5.16859   1
   8  -5   0 10.9138 6.41167   3
   8  -5   0 12.2011 5.62391   2
  -8  -5   0 6.77119 6.73921   1
   8   5   0 6.17921 5.35396   1
   8   5   0 13.9715 4.87220   3
   9  -5   0 -3.9963 1.63393   1
   9  -5   0 1.74841 2.60715   2
   9  -5   0 0.01310 1.74212   2
   9  -5   0 -1.0724 1.56117   1
   9   5   0 -0.4207 2.65222   1
   9   5   0 -0.1978 2.04674   2
   9   5   0 5.82307 3.75444   3
  10  -5   0 157.059 25.9921   3
  10  -5   0 123.248 14.4344   2
  10  -5   0 130.296 12.6162   1
 -10  -5   0 154.352 18.6083   1
  10  -5   0 151.551 14.7875   2
  10   5   0 146.448 26.6806   1
  10   5   0 120.799 12.8488   2
  10   5   0 118.863 12.7776   3
  11  -5   0 73.6696 12.9528   2
  11  -5   0 69.2599 11.9028   1
  11  -5   0 73.3886 12.3039   1
  11  -5   0 73.3380 18.4455   3
  11  -5   0 82.1541 14.5252   2
  11   5   0 96.9576 11.6448   2
  11   5   0 63.6264 11.9789   3
  11   5   0 66.8850 12.7945   2
  12  -5   0 6.98566 4.12708   2
  12  -5   0 3.86610 3.53350   1
  12  -5   0 1.93414 3.46870   1
  12  -5   0 2.79192 5.00828   3
  12  -5   0 2.39369 3.36629   2
  12   5   0 10.4759 5.30399   2
  12   5   0 3.17464 3.41209   2
  12   5   0 16.8156 7.10610   3
  13  -5   0 -0.5653 2.20122   2
  13  -5   0 3.10572 5.47795   3
  13  -5   0 1.09179 2.41741   1
  13   5   0 2.59291 3.56851   2
  13   5   0 9.09589 6.21919   3
   0  -6   0 483.767 23.6053   2
   0  -6   0 513.133 20.9997   1
   0  -6   0 481.858 21.7929   3
   0   6   0 507.971 23.7566   2
   0   6   0 540.565 21.1055   1
  -1  -6   0 26.3277 5.50742   2
  -1  -6   0 22.4134 4.86720   1
  -1  -6   0 25.7250 4.10301   3
   1  -6   0 22.0598 5.61275   2
   1  -6   0 19.6927 3.35768   1
   1  -6   0 22.3929 5.65846   3
  -1   6   0 22.3708 3.47590   1
   1   6   0 24.8295 5.75418   2
   1   6   0 20.5925 4.51738   1
  -1   6   0 16.1245 4.26659   2
  -1   6   0 22.9572 5.36592   3
   2  -6   0 28.1925 2.17693   1
  -2  -6   0 36.9178 7.15974   1
   2  -6   0 20.4902 5.16544   2
  -2  -6   0 20.4898 4.90572   2
   2  -6   0 19.9770 5.71342   3
  -2   6   0 28.7280 6.33293   2
  -2   6   0 23.9426 6.11923   3
   2   6   0 27.1789 6.17812   1
   2   6   0 21.4989 5.52390   2
  -3  -6   0 189.668 13.2455   2
   3  -6   0 175.502 13.3198   2
   3  -6   0 200.662 16.0576   3
  -3  -6   0 174.107 13.8128   1
   3   6   0 181.274 13.8395   1
   3   6   0 193.208 13.1589   2
  -3   6   0 184.689 13.8050   2
  -3   6   0 167.800 14.7516   3
   4  -6   0 2342.55 86.5381   3
  -4  -6   0 2167.39 81.7598   1
  -4  -6   0 2313.76 79.5519   2
  -4   6   0 2342.86 81.2661   2
   4   6   0 2290.79 78.8341   2
   4   6   0 2237.87 81.9241   1
   5  -6   0 245.180 20.4857   3
  -5  -6   0 226.980 17.9710   1
  -5  -6   0 213.811 15.2387   2
   5  -6   0 212.116 15.8750   2
   5   6   0 264.183 16.2534   2
   5   6   0 222.323 17.6604   1
  -5   6   0 225.247 16.5223   2
   6  -6   0 325.900 13.9438   1
  -6  -6   0 343.235 20.2834   2
   6  -6   0 309.727 20.3981   2
   6  -6   0 304.913 24.9815   3
   6  -6   0 317.782 13.8877   1
  -6  -6   0 307.940 22.6735   1
   6   6   0 318.989 13.7643   3
   6   6   0 315.818 19.3499   2
  -6   6   0 349.935 21.7886   2
   6   6   0 347.474 23.6772   1
   7  -6   0 829.766 47.4089   3
   7  -6   0 847.397 31.5328   1
  -7  -6   0 823.052 37.9938   2
   7  -6   0 848.144 39.5449   2
   7  -6   0 819.514 31.3187   1
  -7  -6   0 814.311 42.9989   1
   7   6   0 872.541 44.0408   1
   7   6   0 843.237 41.0939   2
   7   6   0 877.664 31.8462   3
  -7   6   0 792.766 39.2066   2
   8  -6   0 151.432 10.8001   1
   8  -6   0 162.486 26.0862   3
   8  -6   0 162.170 11.1238   1
   8  -6   0 140.349 14.2674   2
  -8  -6   0 130.562 16.1958   1
  -8  -6   0 180.043 15.2582   2
   8   6   0 181.854 14.9104   2
   8   6   0 175.176 18.3666   1
   8   6   0 165.714 11.3760   3
  -9  -6   0 36.9547 8.67467   2
  -9  -6   0 75.4228 16.7772   1
   9  -6   0 65.1881 7.54440   1
   9  -6   0 57.8864 16.2275   3
   9  -6   0 63.6239 11.6770   2
   9  -6   0 54.9418 8.46483   1
   9   6   0 55.5296 10.4401   2
   9   6   0 56.9325 8.57772   3
   9   6   0 71.6705 16.2608   1
  10  -6   0 5.39543 3.67907   1
  10  -6   0 1.42037 6.21559   3
 -10  -6   0 0.46653 2.87495   1
  10  -6   0 3.21465 4.18932   2
  10  -6   0 0.84760 2.18882   1
  10  -6   0 -0.6062 2.63418   2
  10   6   0 0.64683 2.91254   3
  10   6   0 -0.6707 2.28742   2
  11  -6   0 41.3713 10.9577   2
  11  -6   0 45.4181 8.47185   1
  11  -6   0 33.8917 9.14358   2
  11  -6   0 25.9815 11.8137   3
  11   6   0 37.6240 8.98735   2
  11   6   0 35.1656 8.00942   3
  12  -6   0 21.4061 6.74154   1
  12  -6   0 32.3718 9.25235   2
  12  -6   0 21.1630 7.46758   2
  12  -6   0 39.2971 8.70548   1
  12  -6   0 37.0905 15.6317   3
  12   6   0 25.9342 7.17583   3
  12   6   0 26.1826 7.95415   2
  12   6   0 33.4828 9.15618   2
  13  -6   0 5.10145 3.48283   1
  13  -6   0 0.05163 3.68606   3
  13   6   0 -0.2058 2.66618   2
  13   6   0 3.17350 3.18857   3
   0  -7   0 4.04182 2.79743   3
   0  -7   0 1.19268 2.42812   2
   0  -7   0 0.32210 1.62940   1
   0   7   0 0.95266 1.97051   2
   0   7   0 4.11426 2.41461   1
   1  -7   0 708.102 26.0418   1
  -1  -7   0 719.449 31.7783   2
   1  -7   0 663.658 34.3783   2
  -1  -7   0 737.499 30.0667   1
   1  -7   0 692.753 31.3158   3
  -1  -7   0 697.624 26.8532   3
  -1   7   0 677.115 31.3224   2
   1   7   0 728.858 29.6582   1
  -1   7   0 693.310 25.7092   1
   1   7   0 689.878 31.1820   2
   2  -7   0 43.6636 9.25894   3
   2  -7   0 31.7601 2.83559   1
   2  -7   0 27.6704 7.42180   2
  -2  -7   0 29.1581 2.84902   3
  -2  -7   0 34.5115 6.84484   1
  -2   7   0 34.1723 3.00482   1
  -2   7   0 35.8505 7.90367   2
   2   7   0 32.7897 6.98815   2
  -2   7   0 43.6242 8.36438   3
   2   7   0 34.1339 6.88841   1
   3  -7   0 151.890 14.6526   3
   3  -7   0 174.148 13.7288   2
  -3  -7   0 144.993 12.9315   1
  -3  -7   0 180.901 13.5031   2
   3   7   0 140.002 12.0141   2
  -3   7   0 165.303 13.6690   2
   3   7   0 156.880 13.0939   1
   4  -7   0 393.170 26.2732   3
  -4  -7   0 407.614 22.4706   2
   4  -7   0 406.251 23.1878   2
  -4  -7   0 388.244 23.9443   1
   4   7   0 403.617 24.0208   1
  -4   7   0 376.248 22.9594   2
   4   7   0 400.799 22.1396   2
   5  -7   0 -1.6774 1.55209   3
  -5  -7   0 2.82348 2.83690   2
   5  -7   0 3.19271 2.87831   2
  -5  -7   0 4.09630 3.86940   1
   5   7   0 10.3646 4.37358   2
   5   7   0 4.45291 3.46168   1
  -5   7   0 3.06254 3.11160   2
   6  -7   0 325.917 21.8852   2
  -6  -7   0 378.729 25.7157   1
   6  -7   0 359.525 27.9284   3
  -6  -7   0 360.647 21.9293   2
   6   7   0 319.149 23.7776   1
  -6   7   0 332.523 22.6920   2
  -7  -7   0 1115.49 52.3167   1
   7  -7   0 976.278 54.6587   3
  -7  -7   0 1023.30 45.5242   2
   7  -7   0 1036.86 35.0642   1
   7  -7   0 1033.86 46.9301   2
  -7   7   0 1091.33 48.5727   2
   7   7   0 1072.67 51.6476   1
   7   7   0 1026.32 45.0664   2
   8  -7   0 249.858 38.6675   3
   8  -7   0 238.181 19.3004   2
   8  -7   0 234.897 12.4336   1
   8  -7   0 247.636 12.5365   1
  -8  -7   0 253.321 19.1000   2
  -8  -7   0 248.080 27.0147   1
   8   7   0 238.523 18.3645   2
   8   7   0 254.012 27.2503   1
  -8   7   0 243.925 20.2031   2
   8   7   0 256.426 12.2780   3
   9  -7   0 89.6988 7.67901   1
  -9  -7   0 86.6085 14.1019   2
   9  -7   0 65.5355 16.4255   3
  -9  -7   0 82.0411 17.0020   1
   9  -7   0 97.0265 15.3370   2
   9  -7   0 98.9008 7.93584   1
   9   7   0 90.9248 7.57084   3
   9   7   0 68.1531 12.1114   2
   9   7   0 80.2964 15.2436   1
  10  -7   0 31.7208 6.05994   1
  10  -7   0 26.4964 8.35742   2
  10  -7   0 34.8562 6.44721   1
  10  -7   0 37.2328 14.0644   3
 -10  -7   0 21.9636 7.48007   2
 -10  -7   0 40.8616 13.8835   1
  10  -7   0 30.2827 9.23486   2
  10   7   0 23.0904 7.18834   2
  10   7   0 24.6487 5.34695   3
  11  -7   0 22.3128 5.50137   1
 -11  -7   0 40.7617 13.1109   1
  11  -7   0 12.8345 6.08410   2
  11  -7   0 31.6874 14.0103   3
  11  -7   0 33.8150 9.63365   2
  11   7   0 24.0398 7.92921   2
  11   7   0 29.8352 6.33291   3
  12  -7   0 5.24387 4.74259   2
  12  -7   0 1.74130 3.89146   3
  12  -7   0 11.5627 6.69911   2
  12  -7   0 3.95454 3.04672   1
  12  -7   0 15.0312 4.95261   1
  12   7   0 11.5822 5.78067   2
  12   7   0 12.2836 5.68983   2
  13  -7   0 21.5166 7.57504   2
  13   7   0 19.2174 11.8009   2
   0  -8   0 386.149 22.5484   2
   0  -8   0 444.247 21.4748   3
   0  -8   0 392.040 19.3527   1
   0   8   0 409.288 22.8072   2
   0   8   0 406.072 19.2625   1
  -1  -8   0 42.7635 7.78896   1
   1  -8   0 43.5109 8.89531   3
  -1  -8   0 43.8861 8.91222   2
   1  -8   0 40.8049 5.93532   1
  -1  -8   0 45.4627 6.68231   3
   1  -8   0 58.3958 9.97794   2
   1   8   0 37.0019 7.90986   2
  -1   8   0 36.4722 5.33027   1
   1   8   0 25.8134 5.75474   1
  -1   8   0 35.1352 7.87009   2
   2  -8   0 1.28906 2.35671   3
   2  -8   0 2.57539 2.89972   2
  -2  -8   0 2.95807 2.56466   2
   2  -8   0 2.26029 1.31235   1
  -2  -8   0 5.32869 3.06793   1
   2   8   0 1.96190 2.18403   2
  -2   8   0 1.15973 1.07564   1
  -2   8   0 0.02204 1.96841   2
   2   8   0 2.45823 2.11871   1
  -3  -8   0 -1.7345 1.74700   1
   3  -8   0 1.58151 2.23957   3
   3  -8   0 -0.6884 1.76309   2
  -3  -8   0 2.26234 2.63235   2
  -3   8   0 0.40885 2.17789   2
   3   8   0 4.10630 2.67542   1
   3   8   0 -0.5579 1.39221   2
  -4  -8   0 86.5257 12.5453   1
   4  -8   0 131.430 14.7206   3
  -4  -8   0 113.772 11.4943   2
   4  -8   0 116.738 12.0297   2
   4   8   0 82.2281 12.2530   2
   4   8   0 129.256 12.9869   1
  -5  -8   0 21.4905 6.76768   2
  -5  -8   0 12.9802 6.47998   1
   5  -8   0 23.8652 7.36727   2
   5  -8   0 23.3974 8.94920   3
   5   8   0 12.5226 6.01686   1
   5   8   0 22.3989 6.67361   2
  -5   8   0 25.4661 7.75128   2
   6  -8   0 768.078 44.7631   3
  -6  -8   0 755.823 36.8743   2
   6  -8   0 777.050 38.2587   2
  -6  -8   0 712.002 39.9179   1
   6   8   0 762.214 40.6115   1
   6   8   0 788.623 36.8834   2
  -6   8   0 758.547 38.8144   2
   7  -8   0 1349.86 67.8778   3
  -7  -8   0 1423.77 57.7470   2
   7  -8   0 1394.07 58.7613   2
  -7  -8   0 1398.19 63.2614   1
   7   8   0 1341.64 56.2527   2
  -7   8   0 1319.30 59.1109   2
  -8  -8   0 19.8748 7.70975   2
  -8  -8   0 21.2642 9.12031   1
   8  -8   0 28.1707 8.66185   2
   8  -8   0 25.3803 11.4125   3
  -8   8   0 12.8629 7.17969   2
   8   8   0 15.0541 6.57833   2
  -9  -8   0 88.3751 18.9233   1
   9  -8   0 46.0334 11.4048   2
  -9  -8   0 67.9374 12.6845   2
   9  -8   0 60.5812 16.4068   3
   9   8   0 60.0088 11.4004   2
 -10  -8   0 0.75541 2.59684   2
 -10  -8   0 -5.7147 4.60681   1
  10  -8   0 -1.1766 5.07558   3
  10  -8   0 -1.5421 1.30301   2
  10   8   0 2.12400 3.67909   2
  11  -8   0 -0.2526 3.05167   2
 -11  -8   0 6.31759 6.53447   1
  11  -8   0 0.97835 4.30556   3
  11  -8   0 -1.0641 1.95342   2
  11   8   0 -2.2668 2.07119   2
  12  -8   0 4.55444 5.69183   3
  12  -8   0 1.23756 3.14328   2
  12  -8   0 -1.1144 2.48831   2
  12   8   0 -0.8468 3.89775   2
   0  -9   0 1.73544 2.24812   3
   0  -9   0 -0.1225 1.65227   2
   0  -9   0 0.75971 1.85561   1
   0   9   0 0.69952 1.67104   1
  -1  -9   0 84.8415 10.1103   2
  -1  -9   0 83.9180 9.05206   1
  -1  -9   0 85.5982 7.70531   3
   1  -9   0 74.1940 6.83370   1
   1  -9   0 66.2629 11.3964   2
   1  -9   0 96.8932 10.3526   3
  -1   9   0 62.7336 12.6080   2
   1   9   0 88.9744 8.96119   1
  -1   9   0 88.6287 7.08902   1
  -2  -9   0 48.7746 9.94077   2
  -2  -9   0 56.4110 10.1288   1
   2  -9   0 44.0339 4.28233   1
   2  -9   0 59.3535 11.5740   3
   2  -9   0 40.6562 8.34818   2
  -2  -9   0 48.6856 4.68401   3
  -2   9   0 44.0870 4.17100   1
   2   9   0 42.0905 8.01946   1
  -2   9   0 34.0996 7.93919   2
   2   9   0 52.0134 11.4880   2
  -3  -9   0 -1.9453 0.93057   2
   3  -9   0 -1.4653 1.39507   3
  -3  -9   0 -2.0697 1.04584   1
   3  -9   0 3.02538 3.05660   2
   3   9   0 1.32953 2.37311   1
   3   9   0 8.90913 4.56503   2
  -3   9   0 -0.2955 1.70771   2
   4  -9   0 101.013 11.7826   2
  -4  -9   0 104.322 11.7082   2
   4  -9   0 84.3390 14.1027   3
  -4  -9   0 103.216 12.5214   1
   4   9   0 83.4688 12.6160   1
  -4   9   0 103.807 12.1983   2
   4   9   0 105.371 11.5056   2
  -5  -9   0 45.0502 11.3614   1
   5  -9   0 21.7893 8.60951   3
   5  -9   0 32.1030 8.64098   2
  -5  -9   0 27.7025 7.39650   2
   5   9   0 30.5763 9.03359   1
   5   9   0 35.6541 9.04996   2
  -5   9   0 28.2601 8.67133   2
  -6  -9   0 98.3238 15.9511   1
   6  -9   0 136.997 22.5182   3
  -6  -9   0 146.897 14.3774   2
   6  -9   0 114.748 13.4289   2
  -6   9   0 124.340 14.3432   2
   6   9   0 137.312 20.4993   1
   6   9   0 104.360 12.1861   2
   7  -9   0 16.3625 7.24613   2
  -7  -9   0 7.03225 5.15012   2
   7  -9   0 3.59703 5.07491   3
  -7  -9   0 10.2093 6.70110   1
   7   9   0 10.8333 5.25987   2
  -7   9   0 7.88593 5.89725   2
   8  -9   0 727.947 48.2095   3
  -8  -9   0 707.668 37.7645   2
  -8  -9   0 757.597 44.2117   1
   8  -9   0 724.176 38.9643   2
   8   9   0 644.866 36.1618   2
  -8   9   0 657.390 39.0038   2
  -9  -9   0 83.9963 15.3627   2
  -9  -9   0 51.2119 13.5468   1
   9  -9   0 37.1726 12.7015   3
   9  -9   0 40.0129 10.3512   2
   9   9   0 37.3425 9.77434   2
  -9   9   0 29.3590 9.63720   2
  10  -9   0 33.1411 13.0928   3
  10  -9   0 42.8472 11.1617   2
 -10  -9   0 26.7359 8.04589   2
 -10  -9   0 34.6461 11.7568   1
  10   9   0 37.6127 10.0263   2
 -11  -9   0 64.0367 13.2937   2
  11  -9   0 61.6662 21.2966   3
  11  -9   0 68.5890 13.9453   2
 -11  -9   0 36.2758 12.7906   1
  11  -9   0 61.4978 12.7465   2
  11   9   0 40.7375 13.5697   2
  12  -9   0 10.6707 6.64481   2
  12  -9   0 11.5577 7.01113   2
  12   9   0 -0.9196 2.74631   2
   0 -10   0 5.39779 3.54706   2
   0 -10   0 7.70560 4.22980   3
   0 -10   0 4.29092 2.82153   1
   0  10   0 5.66641 3.43934   2
   0  10   0 0.53337 2.12402   1
   1 -10   0 51.3616 10.9834   2
  -1 -10   0 33.0382 6.45387   3
  -1 -10   0 47.1177 8.84088   1
  -1 -10   0 63.5087 11.1718   2
   1 -10   0 53.5427 10.3149   3
   1 -10   0 50.9756 7.42762   1
  -1  10   0 43.5755 5.36046   1
   1  10   0 62.1605 9.75930   1
   1  10   0 42.8577 9.19610   2
  -1  10   0 56.8054 11.2315   2
  -2 -10   0 -1.1819 1.70037   2
  -2 -10   0 1.45803 1.30739   3
  -2 -10   0 -1.1469 1.90068   1
   2 -10   0 3.70908 2.12464   1
   2 -10   0 0.60344 3.15551   3
   2 -10   0 0.86924 2.53986   2
   2  10   0 3.52491 3.49145   1
  -2  10   0 -0.3932 1.10431   1
   2  10   0 3.15837 3.57878   2
  -2  10   0 2.01035 2.92000   2
   3 -10   0 107.341 17.6436   3
  -3 -10   0 92.2316 13.4007   1
  -3 -10   0 73.6351 12.5477   2
   3 -10   0 92.0339 14.7152   2
   3  10   0 101.115 11.7959   2
   3  10   0 92.4419 14.6553   1
  -3  10   0 79.1650 12.5401   2
  -4 -10   0 47.9425 11.2172   1
   4 -10   0 45.5728 11.1943   3
  -4 -10   0 63.1020 12.4285   2
   4 -10   0 38.0902 10.0840   2
   4  10   0 66.5308 11.9326   2
  -4  10   0 35.5703 9.44039   2
   4  10   0 62.5535 12.9864   1
  -5 -10   0 225.210 20.0648   1
   5 -10   0 157.010 16.3214   2
  -5 -10   0 212.551 17.8264   2
   5 -10   0 198.637 20.8421   3
   5  10   0 208.678 19.1215   1
  -5  10   0 212.010 18.7732   2
   5  10   0 197.639 17.1667   2
  -6 -10   0 6.95580 6.15037   1
   6 -10   0 2.27223 3.92848   3
  -6 -10   0 -0.3043 2.36787   2
   6 -10   0 2.75390 3.80609   2
  -6  10   0 -1.1799 1.37218   2
   6  10   0 -1.7649 1.93762   1
   6  10   0 3.29235 2.78775   2
   7 -10   0 764.276 48.3037   3
  -7 -10   0 710.834 42.4595   1
  -7 -10   0 688.273 37.8906   2
   7 -10   0 727.190 39.5781   2
  -7  10   0 714.151 40.4297   2
   7  10   0 695.332 37.6714   2
  -8 -10   0 664.848 37.5421   2
  -8 -10   0 664.779 42.5733   1
   8 -10   0 701.850 39.2066   2
   8 -10   0 742.869 49.3341   3
   8  10   0 616.959 36.1528   2
  -8  10   0 661.039 39.6203   2
  -9 -10   0 58.0879 13.2628   2
   9 -10   0 97.9989 22.4057   3
  -9 -10   0 56.6753 14.4324   1
   9 -10   0 94.3131 16.3570   2
   9  10   0 105.709 16.5745   2
  -9  10   0 116.582 19.0979   2
 -10 -10   0 42.5616 15.2136   1
  10 -10   0 22.2849 8.29465   2
 -10 -10   0 18.2361 6.67104   2
  10 -10   0 36.3936 14.7689   3
 -11 -10   0 2.50229 3.59958   2
  11 -10   0 6.11436 5.11483   2
  11 -10   0 0.56345 4.12108   3
  11  10   0 0.39888 2.71132   2
  12 -10   0 21.4899 9.04292   2
   0 -11   0 -0.0446 1.80213   1
   0 -11   0 -1.0787 1.86670   3
   0 -11   0 -0.2721 2.09749   2
   0  11   0 -2.0441 1.32719   1
   0  11   0 5.94906 3.76228   2
  -1 -11   0 2.41223 3.29423   2
  -1 -11   0 1.48207 3.35899   1
   1 -11   0 7.45737 3.35813   1
  -1 -11   0 2.95430 2.80488   3
   1 -11   0 3.11394 2.99568   3
   1 -11   0 6.11704 4.12867   2
   1  11   0 6.26722 4.40666   1
  -1  11   0 0.50585 1.98118   2
   1  11   0 2.08274 2.50451   2
  -1  11   0 6.96548 3.03136   1
   2 -11   0 416.251 26.9746   3
  -2 -11   0 400.763 18.4968   3
   2 -11   0 411.292 26.6843   2
  -2 -11   0 370.707 23.8245   1
  -2 -11   0 356.327 24.8688   2
  -2  11   0 391.035 26.1275   2
   2  11   0 360.623 24.8621   2
   2  11   0 383.465 23.5525   1
  -2  11   0 407.686 17.5814   1
  -3 -11   0 1624.87 65.8850   2
   3 -11   0 1573.37 66.1483   2
   3 -11   0 1578.57 68.5900   3
  -3 -11   0 1582.87 64.8497   1
   3  11   0 1603.58 64.2014   1
   3  11   0 1566.70 65.0118   2
  -3  11   0 1529.68 66.0115   2
   4 -11   0 3.09455 4.89254   3
  -4 -11   0 3.96608 4.57390   1
   4 -11   0 1.63298 4.09748   2
  -4 -11   0 3.27214 4.56846   2
   4  11   0 6.46241 4.63727   1
   4  11   0 5.41896 3.94743   2
  -4  11   0 8.06869 5.83477   2
   5 -11   0 122.488 19.4946   3
  -5 -11   0 130.699 14.4237   2
  -5 -11   0 135.140 15.9999   1
   5 -11   0 119.945 14.6066   2
  -5  11   0 122.192 17.9054   2
   5  11   0 96.4477 15.3716   1
   5  11   0 110.414 13.4242   2
  -6 -11   0 5.75014 4.09838   2
   6 -11   0 3.15501 3.91904   2
   6  11   0 3.81769 3.78467   1
  -6  11   0 21.2802 8.57230   2
   6  11   0 1.45861 2.34522   2
  -7 -11   0 177.705 20.0554   1
  -7 -11   0 151.440 16.5835   2
   7 -11   0 156.673 28.2006   3
   7 -11   0 137.626 16.5102   2
   7  11   0 175.765 19.5901   1
  -7  11   0 157.090 17.7528   2
   7  11   0 181.040 17.6552   2
   8 -11   0 288.393 29.9526   3
  -8 -11   0 250.620 22.1081   2
   8 -11   0 269.710 23.5568   2
  -8 -11   0 213.867 23.8217   1
   8  11   0 226.147 20.7526   2
  -8  11   0 243.141 38.5555   2
  -9 -11   0 43.9508 12.7563   2
   9 -11   0 30.0018 11.5522   3
   9 -11   0 37.8047 11.0715   2
  -9 -11   0 31.7314 11.7504   1
   9  11   0 32.0729 14.6523   2
  10 -11   0 -0.1701 2.56595   2
 -10 -11   0 1.79196 3.50840   2
  10  11   0 5.21621 5.17729   2
 -11 -11   0 3.44459 4.00488   2
  11 -11   0 1.47673 3.48246   2
  11 -11   0 -1.7479 2.89983   3
  11  11   0 9.77488 7.39959   2
  12 -11   0 -1.0469 2.72353   2
 -12 -11   0 7.47608 5.33113   2
   0 -12   0 73.8389 12.1495   3
   0 -12   0 61.4028 10.3443   1
   0 -12   0 44.3598 10.5934   2
   0  12   0 66.7319 10.0702   1
   0  12   0 48.8195 11.1113   2
  -1 -12   0 40.7898 7.83547   3
  -1 -12   0 37.3509 10.0490   2
   1 -12   0 65.7969 13.5647   2
   1 -12   0 52.1342 8.59024   1
  -1 -12   0 43.6948 9.22649   1
   1 -12   0 40.0587 10.1195   3
  -1  12   0 34.3798 8.43053   2
   1  12   0 50.8829 11.7539   2
  -1  12   0 48.0682 7.93230   1
   2 -12   0 469.364 30.0791   2
   2 -12   0 429.331 28.8766   3
  -2 -12   0 414.607 28.2689   2
  -2 -12   0 415.119 26.1975   1
  -2 -12   0 478.511 21.2739   3
  -2  12   0 414.088 28.5317   2
  -2  12   0 440.438 19.6347   1
   2  12   0 412.667 27.8060   2
   2  12   0 451.264 26.5178   1
   3 -12   0 781.582 43.9701   3
  -3 -12   0 831.099 42.6175   2
  -3 -12   0 812.878 41.1198   1
   3 -12   0 793.651 42.6227   2
   3  12   0 800.038 40.3628   1
  -3  12   0 796.641 43.0133   2
   3  12   0 809.076 42.0315   2
   4 -12   0 1395.50 68.3289   3
  -4 -12   0 1429.74 64.2522   1
  -4 -12   0 1507.72 64.9153   2
   4 -12   0 1531.32 66.1233   2
  -4  12   0 1598.65 67.4632   2
   4  12   0 1477.59 64.0953   1
   4  12   0 1490.79 64.3298   2
  -5 -12   0 36.4655 11.1091   1
   5 -12   0 22.3538 8.80696   3
   5 -12   0 46.2196 11.0572   2
  -5 -12   0 44.9490 11.7403   2
   5  12   0 31.7791 9.93879   1
   5  12   0 52.0821 12.4208   2
  -5  12   0 46.5307 12.4738   2
  -6 -12   0 41.0186 10.7268   2
   6 -12   0 72.1902 18.4529   3
   6 -12   0 66.6783 14.1638   2
  -6 -12   0 42.7195 12.3769   1
   6  12   0 61.1942 13.6110   2
  -6  12   0 72.0119 15.1586   2
  -7 -12   0 36.4899 10.3579   2
   7 -12   0 38.1408 12.4190   3
  -7 -12   0 41.2399 12.2131   1
   7  12   0 34.7895 10.0876   2
  -7  12   0 25.0172 10.5626   2
  -8 -12   0 164.343 25.5451   1
   8 -12   0 155.312 28.0196   3
   8 -12   0 148.828 17.8131   2
   8  12   0 138.480 16.4535   2
   9 -12   0 43.0558 14.9730   3
  -9 -12   0 35.5089 12.4032   1
  -9 -12   0 41.1957 11.4581   2
   9 -12   0 38.5220 11.1212   2
   9  12   0 31.3407 9.79972   2
  -9  12   0 43.7275 13.9076   2
  10 -12   0 33.2808 11.0765   2
 -10 -12   0 23.2929 10.7404   1
 -10 -12   0 30.7780 9.97772   2
  10 -12   0 50.2542 17.6538   3
 -11 -12   0 1.97356 3.25543   2
  11 -12   0 4.68605 4.88942   2
   0 -13   0 -0.9195 1.79777   1
   0 -13   0 2.32247 2.98160   2
   0 -13   0 -1.3557 1.86204   3
   0  13   0 -0.0722 1.21782   2
   0  13   0 -1.9986 1.40963   1
  -1 -13   0 5.23252 5.20230   2
   1 -13   0 7.79195 4.66459   3
  -1 -13   0 11.3584 5.39404   1
  -1 -13   0 15.6853 5.18755   3
   1 -13   0 3.65742 3.90574   2
   1 -13   0 16.0765 5.06280   1
  -1  13   0 13.5655 6.17625   2
   1  13   0 20.4763 8.15201   2
   1  13   0 21.8082 7.35257   1
  -1  13   0 16.1537 4.91422   1
   2 -13   0 830.674 44.5816   2
  -2 -13   0 797.503 33.2124   3
   2 -13   0 882.843 44.9342   3
  -2 -13   0 826.590 44.0396   2
  -2 -13   0 823.934 40.8983   1
   2  13   0 780.366 42.7956   2
  -2  13   0 848.933 44.8318   2
  -2  13   0 836.146 32.2117   1
   2  13   0 795.232 39.7616   1
   3 -13   0 1063.47 53.2453   2
  -3 -13   0 1103.52 53.1060   2
  -3 -13   0 1022.63 50.1624   1
   3 -13   0 1089.13 54.9593   3
   3  13   0 1149.98 51.2066   1
  -3  13   0 1014.51 52.7469   2
   3  13   0 1099.10 52.6728   2
  -4 -13   0 63.0830 14.0624   1
   4 -13   0 66.0946 16.6259   3
  -4 -13   0 49.9729 11.7761   2
   4 -13   0 63.2631 14.6324   2
   4  13   0 54.0928 12.3049   1
   4  13   0 55.9309 12.9609   2
  -4  13   0 40.2364 11.3999   2
   5 -13   0 113.072 18.8929   2
  -5 -13   0 159.944 19.0163   1
   5 -13   0 133.358 25.9768   3
  -5 -13   0 110.991 18.7881   2
   5  13   0 124.811 19.3344   2
   6 -13   0 15.6866 7.44444   2
   6 -13   0 15.1373 9.89406   3
  -6 -13   0 24.8404 9.70069   1
   6  13   0 13.5325 6.49071   2
   6  13   0 1.72901 3.65442   1
   7 -13   0 83.5637 17.0431   2
   7 -13   0 57.3317 17.2570   3
  -7 -13   0 109.187 20.8440   1
  -7 -13   0 75.3298 15.5190   2
   7  13   0 77.9340 15.1941   2
   8 -13   0 2.56797 4.98693   3
  -8 -13   0 5.98466 6.14231   1
   8 -13   0 0.02696 3.37880   2
  -8 -13   0 -4.0134 2.06414   2
   8  13   0 -0.8438 2.82224   2
  -9 -13   0 5.43565 9.47732   1
  -9 -13   0 11.2614 6.62784   2
   9 -13   0 24.5542 10.0226   2
  10 -13   0 25.2789 14.1065   3
  10 -13   0 2.51364 3.73643   2
 -10 -13   0 4.59584 5.55395   1
 -10 -13   0 29.8661 11.5252   2
 -11 -13   0 1.21054 3.44366   2
  11 -13   0 4.57942 4.78733   2
   0 -14   0 92.1193 10.8360   1
   0 -14   0 91.8997 17.0252   2
   0 -14   0 113.131 16.2889   3
   1 -14   0 38.0874 11.1893   2
  -1 -14   0 28.0780 9.10351   3
  -1 -14   0 26.2908 8.63290   2
   1 -14   0 30.7977 7.05117   1
  -1 -14   0 30.6002 8.84845   1
   1 -14   0 27.9078 8.80760   3
   1  14   0 20.9217 7.61200   2
  -1  14   0 23.9119 6.08191   1
   1  14   0 19.2969 6.36866   1
  -2 -14   0 -1.4905 2.26608   1
   2 -14   0 1.68171 3.72336   3
  -2 -14   0 4.87119 4.69893   2
   2 -14   0 3.80614 4.22119   2
  -2 -14   0 6.04494 3.25202   3
   2  14   0 3.74574 5.25973   2
  -2  14   0 4.83517 3.15556   1
   2  14   0 4.57798 4.04729   1
   3 -14   0 609.626 37.8332   3
  -3 -14   0 597.951 38.1870   2
  -3 -14   0 542.830 32.9988   1
   3  14   0 584.149 33.3281   1
  -3  14   0 318.216 28.9717   2
  -4 -14   0 221.677 21.0388   1
   4 -14   0 213.745 21.5928   2
  -4 -14   0 175.350 25.8877   2
   4 -14   0 206.519 22.4990   3
   4  14   0 218.722 21.4376   1
   4  14   0 196.980 20.0502   2
   5 -14   0 -1.1841 2.99887   3
  -5 -14   0 -1.0572 2.72323   2
   5 -14   0 5.44793 5.47423   2
  -5 -14   0 -2.4743 3.44782   1
   5  14   0 -0.6446 2.19765   2
   6 -14   0 41.6541 12.0586   2
  -6 -14   0 36.7486 12.0409   1
  -6 -14   0 39.5388 11.1043   2
   6 -14   0 23.6562 11.4448   3
   6  14   0 27.6326 8.55826   2
  -6  14   0 42.9864 12.4678   2
   7 -14   0 63.9924 15.2675   2
  -7 -14   0 45.1575 12.5064   1
   7 -14   0 32.9353 11.8022   3
  -7 -14   0 41.0670 11.4114   2
   7  14   0 43.4616 15.6114   2
   8 -14   0 1.83666 3.51721   3
  -8 -14   0 -2.2856 2.99190   1
   8 -14   0 -1.9796 1.98172   2
  -8 -14   0 -3.3539 1.92513   2
  -9 -14   0 -2.0627 2.46510   2
  -9 -14   0 1.11561 4.94869   1
   9 -14   0 11.0589 10.5856   3
   9 -14   0 1.95420 4.73453   2
  10 -14   0 4.68550 5.46809   2
 -10 -14   0 2.66825 4.90880   2
   0 -15   0 -2.3172 2.09422   1
   0 -15   0 8.38978 5.08810   3
   0 -15   0 -1.1015 1.60706   2
   0  15   0 0.70931 2.44570   1
  -1 -15   0 3.14584 3.03933   3
   1 -15   0 -1.6862 1.93543   2
  -1 -15   0 15.4826 6.29731   1
   1 -15   0 9.06803 6.05589   3
  -1 -15   0 -0.2927 2.75042   2
  -1  15   0 -0.5965 1.93040   1
   1  15   0 1.49559 3.46801   1
   2 -15   0 21.3790 8.94124   2
   2 -15   0 23.8478 8.79481   3
  -2 -15   0 16.7162 4.93191   3
  -2 -15   0 15.5429 6.74186   1
  -2 -15   0 1.44447 4.18563   2
   2  15   0 16.7220 7.50580   2
   2  15   0 9.06461 5.93533   1
  -2  15   0 25.8662 5.66300   1
  -3 -15   0 43.7692 12.3239   2
   3 -15   0 59.5937 14.9434   2
   3 -15   0 46.9876 12.2590   3
  -3 -15   0 46.6537 12.4126   1
   3  15   0 30.5482 10.4575   2
  -3  15   0 46.0285 15.0481   2
   3  15   0 48.8035 11.4547   1
  -4 -15   0 9.62380 6.66936   2
   4 -15   0 12.0872 7.38487   2
  -4 -15   0 14.1307 7.24699   1
   4 -15   0 11.9349 7.39645   3
   4  15   0 10.4320 5.74876   2
  -4  15   0 25.6404 10.0835   2
  -5 -15   0 9.54634 6.55002   2
   5 -15   0 -0.2022 3.43015   2
  -5 -15   0 -3.7419 4.82950   1
   5 -15   0 1.25175 4.05510   3
  -6 -15   0 6.87255 5.96604   1
   6 -15   0 25.5520 12.1146   3
   6 -15   0 8.07971 5.17511   2
  -6 -15   0 3.61545 5.39952   2
   7 -15   0 0.82458 3.34716   3
   7 -15   0 1.13710 3.01577   2
  -7 -15   0 -1.4638 3.02113   1
  -7 -15   0 -3.4493 1.98532   2
  -8 -15   0 105.161 21.5969   1
   8 -15   0 78.8835 17.5625   2
  -8 -15   0 70.9444 15.7042   2
   8 -15   0 68.7113 20.6246   3
   9 -15   0 113.865 27.6932   3
  -9 -15   0 51.4251 13.5680   2
   9 -15   0 52.8209 14.2943   2
  -9 -15   0 72.2375 20.7977   1
 -10 -15   0 12.2504 6.90251   2
  10 -15   0 6.79061 8.64995   2
   0 -16   0 572.375 33.6745   3
   0 -16   0 595.576 39.3799   2
   0  16   0 621.559 31.9237   1
  -1 -16   0 332.922 22.6171   3
   1 -16   0 354.379 29.5350   2
   1 -16   0 409.928 28.5070   3
  -1 -16   0 344.808 29.2545   2
  -1 -16   0 429.535 27.1405   1
   1  16   0 351.347 24.1203   1
  -1  16   0 347.540 20.9194   1
  -2 -16   0 185.854 13.7636   3
  -2 -16   0 191.568 21.1531   2
   2 -16   0 207.383 22.0960   2
  -2 -16   0 181.130 18.3606   1
   2 -16   0 190.907 20.3729   3
  -2  16   0 179.845 12.4308   1
  -2  16   0 169.601 13.0210   1
   2  16   0 162.989 16.7498   1
  -3 -16   0 3.90957 4.23372   2
   3 -16   0 1.06459 4.70275   3
   3 -16   0 15.8832 8.47632   2
   3  16   0 2.53433 4.84352   1
  -4 -16   0 27.7685 10.1322   1
   4 -16   0 44.0188 13.4321   3
  -4 -16   0 28.2730 10.6469   2
   4 -16   0 41.9391 13.7886   2
   4  16   0 28.4648 10.7316   1
   5 -16   0 4.01159 5.39972   2
   5 -16   0 5.12658 5.49694   3
  -5 -16   0 -1.6994 4.71920   1
  -5 -16   0 2.76707 4.19689   2
  -6 -16   0 3.62400 4.49576   1
   6 -16   0 4.76194 6.19042   3
  -6 -16   0 -4.0728 2.18521   2
   6 -16   0 -1.0194 2.46568   2
  -7 -16   0 60.7620 14.4069   2
   7 -16   0 77.8993 17.0935   2
  -7 -16   0 37.2203 12.6111   1
   7 -16   0 66.2861 16.9763   3
  -8 -16   0 206.095 23.1928   2
   8 -16   0 195.480 23.5083   2
  -8 -16   0 161.509 27.7089   1
   8 -16   0 230.490 36.7431   3
  -9 -16   0 10.9616 7.67122   2
   9 -16   0 12.4322 8.34327   2
   0 -17   0 6.21709 5.04204   3
   0 -17   0 16.1559 7.99670   2
   0  17   0 8.61451 4.60589   1
  -1 -17   0 926.340 55.4453   2
   1 -17   0 1034.50 52.4017   3
  -1 -17   0 1042.11 46.9002   3
  -1 -17   0 1029.44 49.7978   1
   1 -17   0 953.658 55.5867   2
   1  17   0 1055.00 49.0278   1
  -1  17   0 1154.44 53.2545   1
   2 -17   0 198.419 22.6942   2
  -2 -17   0 223.250 20.9160   1
  -2 -17   0 217.705 15.3896   3
  -2 -17   0 235.917 24.6678   2
   2 -17   0 207.975 21.9664   3
  -2  17   0 226.330 14.3981   1
   2  17   0 216.855 19.8320   1
  -2  17   0 219.771 15.3190   1
  -3 -17   0 21.8726 10.2084   2
   3 -17   0 11.6858 6.26892   2
  -3 -17   0 30.5691 9.99331   1
   3 -17   0 47.1639 14.4336   3
  -4 -17   0 71.4574 16.3239   1
   4 -17   0 23.2389 10.9927   3
  -4 -17   0 25.9928 10.7495   2
   4 -17   0 54.4780 15.7964   2
  -5 -17   0 12.8456 8.92124   2
  -5 -17   0 17.9046 9.40808   1
   5 -17   0 8.96285 7.31896   3
   5 -17   0 9.46892 7.12611   2
  -6 -17   0 -1.4217 2.88045   1
   6 -17   0 11.0975 7.57458   2
  -6 -17   0 8.95640 7.41976   2
   6 -17   0 3.95883 6.78081   3
  -7 -17   0 91.8815 19.8859   2
  -7 -17   0 103.609 22.1184   1
   7 -17   0 72.4248 19.4793   3
   7 -17   0 94.9025 27.3640   2
   8 -17   0 29.0706 10.7293   2
   0 -18   0 846.522 50.8711   2
   0 -18   0 759.747 41.7849   3
   0  18   0 754.099 38.6004   1
   1 -18   0 322.627 30.2667   2
  -1 -18   0 347.031 31.4672   2
  -1 -18   0 327.601 22.9710   3
   1 -18   0 349.738 27.8191   3
   1  18   0 350.654 25.3312   1
  -1  18   0 354.718 21.7771   1
   2 -18   0 89.6140 19.7535   2
  -2 -18   0 74.2928 18.4814   2
  -2 -18   0 78.1230 9.25026   3
   2 -18   0 90.4947 20.4368   3
  -2  18   0 73.8240 8.75686   1
  -2  18   0 84.5530 8.62021   1
  -3 -18   0 70.9992 17.8062   2
  -3 -18   0 70.6041 16.2585   1
   3 -18   0 89.2369 17.9587   2
   3 -18   0 51.8418 14.0798   3
   4 -18   0 2.02343 4.25196   2
   4 -18   0 21.0129 9.65416   3
  -4 -18   0 29.6246 11.7467   1
  -4 -18   0 45.3488 14.6290   2
   5 -18   0 7.62805 6.33570   3
  -5 -18   0 22.0632 9.63229   2
   5 -18   0 25.4520 10.9537   2
  -5 -18   0 24.4536 10.4025   1
   6 -18   0 16.8612 9.40296   2
   6 -18   0 25.4898 18.5257   3
  -6 -18   0 14.9336 8.93404   1
  -7 -18   0 8.36965 7.33863   2
   7 -18   0 3.24397 4.92390   2
   7 -18   0 3.89831 6.27074   3
  -8 -18   0 49.7743 15.0663   2
   0 -19   0 4.59284 4.08862   3
   0 -19   0 0.14846 3.18942   2
   0  19   0 7.03001 4.71455   1
  -1 -19   0 176.375 16.3663   3
  -1 -19   0 122.410 21.0139   2
   1 -19   0 152.270 26.9872   2
   1 -19   0 161.493 19.0045   3
   1  19   0 169.272 17.4095   1
  -1  19   0 122.039 14.1898   1
  -1  19   0 150.704 13.8399   1
  -2 -19   0 76.4009 18.2294   2
  -2 -19   0 125.061 11.8217   3
   2 -19   0 90.1883 25.8346   2
   2 -19   0 89.4601 17.8628   3
  -2  19   0 114.144 10.6760   1
  -2  19   0 95.2463 9.11671   1
   3 -19   0 125.287 23.3195   3
   3 -19   0 137.025 27.1825   2
   4 -19   0 5.01705 5.93804   3
   4 -19   0 -3.2613 2.32922   2
  -4 -19   0 3.08784 4.97517   2
  -5 -19   0 -1.7409 2.10756   2
   5 -19   0 11.9154 9.29121   3
   5 -19   0 2.84243 5.51297   2
  -6 -19   0 43.2317 14.0056   2
   6 -19   0 42.8281 14.1148   2
   6 -19   0 63.5359 18.2229   3
  -7 -19   0 0.96915 6.68406   2
   0 -20   0 69.3513 18.3448   2
   0 -20   0 98.2591 17.2106   3
   0  20   0 85.7075 14.6036   1
   1 -20   0 42.3733 14.0977   2
   1 -20   0 73.2210 16.2985   3
  -1 -20   0 69.8256 13.1397   3
  -1 -20   0 37.6713 13.6742   2
  -1  20   0 70.4702 11.8386   1
  -1  20   0 50.8092 10.9289   1
   2 -20   0 12.5585 8.29052   2
   2 -20   0 10.2451 7.45757   3
  -2 -20   0 14.6470 8.95956   2
  -2  20   0 22.3759 5.23152   1
  -2  20   0 13.8297 4.41361   1
   3 -20   0 26.8535 11.0242   3
  -3 -20   0 31.2572 11.2616   2
   3 -20   0 18.0871 8.88454   2
  -4 -20   0 6.14241 5.88822   2
   4 -20   0 0.62234 3.89087   3
   4 -20   0 2.00845 5.59631   2
   5 -20   0 2.97921 6.51879   3
   0 -21   0 -2.7231 2.08306   3
   0  21   0 -0.4242 2.53714   1
   0  21   0 -0.9927 2.44847   1
  -1 -21   0 22.9568 7.61249   3
   1 -21   0 10.2272 6.96823   3
  -1  21   0 24.5038 7.23802   1
   1  21   0 11.8858 8.01969   1
  -1  21   0 20.7287 9.80233   1
   2 -21   0 1.56683 3.61704   3
   3 -21   0 -0.3006 4.22158   3
   4 -21   0 64.3528 18.2746   3
   0 -22   0 5.69665 5.71874   3
   0  22   0 6.35824 5.23573   1
   1 -22   0 7.22779 6.13782   3
   1  22   0 10.4979 8.07644   1
  13   0  -1 10.2475 4.75756   2
  13   0  -1 9.80586 4.48109   2
  13   0  -1 22.1119 10.0868   3
  12   0  -1 -1.7049 2.08930   3
  12   0  -1 2.18930 3.81289   1
  12   0  -1 0.43118 2.74558   2
  12   0  -1 -1.7316 1.40825   2
  11   0  -1 201.404 16.6802   2
  11   0  -1 221.523 23.2467   3
  10   0  -1 2.25757 2.86274   1
  10   0  -1 0.43951 1.93833   2
  10   0  -1 -2.8965 2.03091   3
  10   0  -1 -0.0577 2.55936   2
   9   0  -1 199.062 19.4473   3
   9   0  -1 210.824 18.3359   1
   9   0  -1 196.180 14.0944   2
   9   0  -1 239.678 16.1769   2
  -9   0   1 195.200 17.7173   1
   8   0  -1 3.21987 4.49402   3
   8   0  -1 3.18256 3.59633   1
  -8   0   1 2.16112 3.03561   1
   8   0  -1 3.83874 3.07707   2
   8   0  -1 1.10527 2.05581   2
  -7   0   1 65.0663 10.6615   1
   7   0  -1 59.7415 10.0375   1
   7   0  -1 79.6785 13.9154   3
   7   0  -1 67.1217 7.51000   2
   7   0  -1 67.4102 7.03318   2
  -6   0   1 0.00364 1.82579   1
   6   0  -1 -0.0835 1.22685   2
   6   0  -1 -1.1051 1.84073   3
   6   0  -1 -0.5957 1.54244   1
   6   0  -1 -1.8565 0.97566   2
  -5   0   1 341.602 18.3860   1
   5   0  -1 322.869 18.0685   1
   5   0  -1 346.483 15.7329   2
   5   0  -1 334.307 16.1154   2
   5   0  -1 330.948 19.7443   3
  -5   0   1 329.224 19.7568   3
  -4   0   1 1.85514 2.20153   1
   4   0  -1 2.81304 1.72183   2
  -4   0   1 5.53331 3.13120   3
   4   0  -1 2.16539 1.49220   2
   4   0  -1 3.49247 2.44636   3
   4   0  -1 1.62229 2.40062   1
   3   0  -1 431.830 19.6175   3
   3   0  -1 433.594 18.4689   1
   3   0  -1 444.357 16.6450   2
   3   0  -1 452.274 16.3794   2
  -3   0   1 411.571 18.2201   1
  -3   0   1 423.852 19.5452   3
  -2   0   1 1.27806 1.02584   1
   2   0  -1 0.03052 0.56604   2
   2   0  -1 0.60258 0.95739   3
  -2   0   1 -0.3147 0.88840   3
   2   0  -1 1.99699 1.27619   1
   1   0  -1 5748.17 173.337   4
  -1   0   1 5705.57 173.060   4
  -2   0  -1 -0.3340 0.88966   1
   2   0   1 1.22207 1.19584   1
   2   0   1 -0.7923 0.58001   2
   2   0   1 1.37889 1.47511   3
   4   0   1 0.45132 2.07539   3
   4   0   1 -1.3737 0.64598   2
   4   0   1 1.03485 1.85963   1
  -4   0  -1 2.21453 2.07736   1
   5   0   1 25.6290 5.71593   1
  -5   0  -1 34.0475 6.87877   1
   5   0   1 20.4591 4.77100   2
   5   0   1 20.2717 5.90422   3
   5   0   1 19.8591 4.65093   2
  -6   0  -1 1.89422 2.91167   1
   6   0   1 2.27721 3.36405   3
   6   0   1 2.96405 2.71986   1
   6   0   1 2.36042 2.40312   2
   6   0   1 3.73487 3.20123   2
  -7   0  -1 2494.64 87.1725   1
   7   0   1 2330.81 88.6217   2
   7   0   1 2401.35 90.2761   3
   7   0   1 2431.92 83.1325   2
   8   0   1 -0.1709 3.02731   3
   8   0   1 -0.3342 2.18982   2
   8   0   1 4.84693 3.75549   2
   8   0   1 2.26801 3.37799   1
   9   0   1 -1.9672 1.47669   2
   9   0   1 6.80372 4.85541   3
   9   0   1 -0.1988 1.97539   1
   9   0   1 3.45351 3.27141   2
  10   0   1 5.58462 4.74351   3
  10   0   1 -2.4266 1.70845   2
  10   0   1 7.02907 4.70284   1
  10   0   1 -2.3678 2.17848   2
  11   0   1 127.027 17.7785   2
  11   0   1 146.672 17.4263   1
  11   0   1 117.090 13.1466   2
  12   0   1 0.94434 4.29554   1
  12   0   1 0.78075 2.36335   2
  12   0   1 -0.3234 2.75711   3
  12   0   1 3.56902 3.75161   2
  13   0   1 10.8356 8.78943   3
  13   0   1 2.70875 4.66263   1
  13   0   1 3.95389 3.63032   2
  13   0   1 10.2798 5.98551   2
  13  -1  -1 -1.9838 2.37365   3
  13  -1  -1 8.41851 4.02488   2
  13  -1  -1 -1.2756 2.59938   1
  13  -1  -1 10.6002 4.98495   2
  13   1  -1 9.72747 7.09107   3
  13   1  -1 5.90811 4.42851   2
  13   1  -1 2.87723 2.86784   2
  12  -1  -1 1.38521 2.50791   2
  12  -1  -1 -2.7855 2.40655   1
  12  -1  -1 0.33792 3.65088   3
  12  -1  -1 1.70578 2.43235   2
  12   1  -1 10.2936 7.05282   3
  12   1  -1 2.41052 3.05619   2
  12   1  -1 10.4090 5.02155   2
  11  -1  -1 117.875 18.4796   1
  11  -1  -1 136.029 13.8448   2
  11  -1  -1 149.572 23.7756   3
  11  -1  -1 139.203 13.7207   2
  11   1  -1 178.055 26.2662   2
  11   1  -1 145.986 17.6181   1
  11   1  -1 142.374 17.9244   3
  11   1  -1 137.877 13.8650   2
  10  -1  -1 110.275 11.9653   2
 -10  -1   1 139.694 16.0159   1
  10  -1  -1 142.785 15.4307   1
  10  -1  -1 138.987 22.2806   3
  10  -1  -1 127.749 11.7394   2
  10   1  -1 158.520 12.7015   2
  10   1  -1 125.580 15.3497   1
  10   1  -1 141.405 13.0798   2
  10   1  -1 107.148 17.8715   3
   9  -1  -1 4.01651 2.96214   2
  -9  -1   1 -0.6585 2.27263   1
   9  -1  -1 4.97646 3.27294   2
   9  -1  -1 4.05176 4.59920   3
   9  -1  -1 -0.5520 2.24602   1
   9   1  -1 2.76270 4.13178   1
   9   1  -1 6.02485 3.19748   2
   9   1  -1 4.75869 3.23666   2
   9   1  -1 -0.9002 2.18329   3
  -9   1   1 8.28854 5.28437   1
   8  -1  -1 58.5039 10.4855   1
   8  -1  -1 62.8373 9.64154   2
   8  -1  -1 60.3997 7.21789   2
  -8  -1   1 43.4160 9.50534   1
   8  -1  -1 51.4578 12.2821   3
   8   1  -1 55.2445 9.06287   2
   8   1  -1 41.2566 9.48866   1
   8   1  -1 51.1341 8.08292   2
   8   1  -1 39.0601 9.63437   3
  -8   1   1 66.0497 11.3155   1
   7  -1  -1 6.54418 2.92181   2
   7  -1  -1 4.30182 3.09735   1
  -7  -1   1 -0.2825 2.52196   1
   7  -1  -1 6.42097 3.11736   2
   7  -1  -1 1.19512 4.51437   3
   7   1  -1 2.70860 2.52993   2
   7   1  -1 2.41848 3.78261   3
   7   1  -1 0.74857 1.74487   2
   7   1  -1 2.72271 3.49163   1
  -7   1   1 4.42640 3.08006   1
   6  -1  -1 7.90768 4.77745   3
  -6  -1   1 4.12293 3.13441   1
   6  -1  -1 8.51620 3.58237   1
   6  -1  -1 6.11545 2.76917   2
   6  -1  -1 5.11993 2.79738   2
  -6   1   1 8.63140 3.71158   1
   6   1  -1 0.66347 2.06178   2
   6   1  -1 7.40106 4.15121   3
  -6   1   1 4.60317 3.82721   3
   6   1  -1 4.05981 3.20671   1
  -5  -1   1 69.5847 8.09690   3
   5  -1  -1 78.0137 9.44513   3
   5  -1  -1 73.4206 7.54481   1
   5  -1  -1 74.1320 6.56735   2
  -5  -1   1 73.1517 8.29102   1
   5  -1  -1 72.8800 6.68860   2
   5   1  -1 96.0544 9.30079   3
   5   1  -1 76.3134 6.34906   2
  -5   1   1 71.4680 11.0460   3
   5   1  -1 64.4326 9.85586   1
  -5   1   1 69.5693 7.35642   1
   4  -1  -1 878.418 31.2431   2
   4  -1  -1 829.218 32.1107   1
  -4  -1   1 856.180 30.4709   2
   4  -1  -1 839.260 35.8757   3
  -4  -1   1 883.512 34.1147   3
  -4  -1   1 860.715 34.1779   1
  -4   1   1 823.092 35.6930   3
   4   1  -1 892.158 34.1274   3
   4   1  -1 837.417 34.0016   1
  -4   1   1 863.203 32.3171   1
   4   1  -1 860.992 30.3501   2
  -3  -1   1 4.21182 2.10641   3
   3  -1  -1 2.93811 2.23016   3
   3  -1  -1 3.77143 1.84481   1
   3  -1  -1 2.18609 1.44438   2
  -3  -1   1 2.27482 1.23381   2
  -3  -1   1 3.43640 2.08547   1
  -3   1   1 2.82761 2.06767   3
  -3   1   1 2.60083 1.59834   1
   3   1  -1 5.99478 2.30359   1
   3   1  -1 3.58262 1.92073   3
   3   1  -1 2.29063 1.24616   2
   2  -1  -1 2.03131 1.21661   2
   2  -1  -1 1.41386 1.58232   3
  -2  -1   1 5.00584 1.81373   1
  -2  -1   1 1.92797 1.20602   3
   2  -1  -1 2.76121 1.21253   1
  -2  -1   1 2.01606 0.95649   2
   2   1  -1 2.59998 1.36522   3
   2   1  -1 2.08224 1.34479   1
  -2   1   1 1.38473 1.47365   3
  -2   1   1 4.44239 1.43422   1
  -2   1   1 4.04866 1.39308   2
   1  -1  -1 -0.3182 0.54786   3
  -1  -1   1 1.69726 0.64169   2
  -1  -1   1 0.85758 0.80700   1
  -1  -1   1 1.37279 0.68062   3
  -1   1   1 1.03103 0.65220   2
  -1   1   1 1.69401 0.57556   1
   1   1  -1 0.28457 0.64807   1
  -1   1   1 1.15525 0.93332   3
   0   1  -1 -0.0853 0.26115   1
   0   1   1 -0.1189 0.20354   2
   1  -1   1 10.4033 2.18132   2
  -1  -1  -1 8.62562 2.05428   1
  -1  -1  -1 8.43729 1.74209   2
  -1   1  -1 11.7083 2.24327   2
   1   1   1 11.3529 2.36835   1
  -1   1  -1 10.8659 1.83056   1
   1   1   1 11.7084 2.12317   2
   2  -1   1 68.8125 6.24464   3
   2  -1   1 57.6381 4.83625   2
   2  -1   1 63.8360 4.51445   1
  -2  -1  -1 64.5697 4.78951   2
  -2  -1  -1 58.3066 5.18128   1
   2   1   1 63.0581 4.76389   2
  -2   1  -1 52.6206 4.64053   2
   2   1   1 61.1491 5.33463   1
   3  -1   1 255.859 12.9913   2
  -3  -1  -1 261.049 12.6249   2
   3  -1   1 251.815 12.4724   1
  -3  -1  -1 264.124 13.8389   1
   3  -1   1 270.863 15.3700   3
   3   1   1 258.415 13.4126   3
   3   1   1 252.041 13.7504   1
   3   1   1 241.562 12.2345   2
   4  -1   1 100.223 8.01250   2
  -4  -1  -1 86.1590 8.20756   1
   4  -1   1 100.761 7.94053   1
   4  -1   1 96.3413 9.61816   3
  -4  -1  -1 77.2763 6.86983   2
   4  -1   1 94.6024 7.56593   2
   4   1   1 82.0233 7.95236   3
   4   1   1 81.8377 8.05843   1
  -4   1  -1 80.7417 7.24771   1
   4   1   1 83.8431 6.99279   2
   5  -1   1 107.555 8.83271   2
   5  -1   1 99.3840 8.96395   1
  -5  -1  -1 96.1352 9.76159   1
   5  -1   1 108.670 9.19900   2
   5  -1   1 117.141 11.6839   3
   5   1   1 97.3998 9.82559   3
   5   1   1 93.3812 8.18272   2
   5   1   1 113.389 10.3756   1
  -5   1  -1 93.8155 8.74123   1
  -6  -1  -1 562.665 29.2287   1
   6  -1   1 618.936 28.6996   1
   6  -1   1 651.338 33.3221   3
   6  -1   1 603.063 27.2436   2
   6  -1   1 591.857 27.8957   2
   6   1   1 603.766 30.6657   3
   6   1   1 637.752 30.6057   1
   6   1   1 563.681 26.3942   2
   7  -1   1 198.948 18.4530   3
   7  -1   1 195.152 15.0809   2
  -7  -1  -1 193.909 16.1537   1
   7  -1   1 187.858 13.8664   2
   7  -1   1 175.302 14.6957   1
   7   1   1 189.087 16.1384   1
   7   1   1 192.721 13.7352   2
   7   1   1 187.463 16.6940   2
   7   1   1 179.079 16.4536   3
   8  -1   1 164.393 13.2100   2
   8  -1   1 155.517 14.4451   1
   8  -1   1 158.316 13.7998   2
   8  -1   1 163.558 17.4349   3
  -8  -1  -1 144.591 14.7464   1
   8   1   1 123.766 12.4550   2
   8   1   1 118.741 13.8299   1
   8   1   1 167.437 16.3912   3
   8   1   1 154.197 12.7434   2
   9  -1   1 21.2434 7.22011   2
   9  -1   1 23.5069 7.83875   1
   9  -1   1 2.78188 3.23987   3
   9  -1   1 5.23589 3.38526   2
   9   1   1 5.59997 4.36209   1
   9   1   1 14.4943 6.79510   3
   9   1   1 -0.3864 1.65513   2
   9   1   1 10.0954 4.96172   2
  10  -1   1 69.5372 11.4120   2
  10  -1   1 69.4392 12.3790   2
  10  -1   1 91.7890 15.7977   1
  10  -1   1 92.0411 19.1570   3
  10   1   1 45.4437 12.5012   1
  10   1   1 80.2041 13.7283   2
  10   1   1 75.6695 12.2295   2
  10   1   1 87.8090 16.0586   3
  11  -1   1 79.4620 12.8252   2
  11  -1   1 96.9947 17.2852   1
  11  -1   1 89.7335 19.2389   3
  11  -1   1 87.7847 14.9967   2
  11  -1   1 141.335 16.8995   1
  11   1   1 128.787 19.5377   1
  11   1   1 97.0349 15.4253   2
  11   1   1 99.1069 12.0531   2
  11   1   1 148.978 22.4286   3
  12  -1   1 3.11553 5.24842   3
  12  -1   1 4.77418 4.28175   2
  12  -1   1 8.23660 5.61584   1
  12  -1   1 14.5752 6.67146   2
  12  -1   1 -1.5291 2.11929   1
  12   1   1 8.39561 6.13086   3
  12   1   1 6.16646 4.19991   2
  12   1   1 10.8167 4.83211   2
  13  -1   1 0.93831 2.94188   2
  13  -1   1 -0.8237 2.15314   2
  13  -1   1 0.96925 3.19362   1
  13  -1   1 -1.7511 3.35044   3
  13   1   1 3.52558 4.15882   3
  13   1   1 1.09165 2.68913   2
  13   1   1 15.2689 8.51148   1
  13   1   1 -1.9808 2.23829   2
  13  -2  -1 2.90711 3.67102   1
  13  -2  -1 25.1813 12.3612   3
  13  -2  -1 13.6405 5.61466   2
  13  -2  -1 10.3321 5.43700   2
  13   2  -1 10.6258 5.61243   2
  13   2  -1 4.19784 4.67819   3
  13   2  -1 17.2677 6.37532   2
  12  -2  -1 126.866 22.6158   1
  12  -2  -1 155.111 14.6639   2
  12  -2  -1 135.220 13.1325   2
  12  -2  -1 152.535 25.9051   3
  12   2  -1 143.927 13.1871   2
  12   2  -1 152.164 14.4163   2
  12   2  -1 174.256 27.3624   3
  11  -2  -1 449.840 35.8239   3
  11  -2  -1 419.582 28.6882   1
  11  -2  -1 411.136 25.4848   2
  11  -2  -1 416.819 24.1627   2
  11   2  -1 423.970 31.9581   1
  11   2  -1 440.582 25.8218   2
  11   2  -1 383.083 29.7483   3
  11   2  -1 460.842 26.1296   2
  10  -2  -1 329.741 21.6970   2
  10  -2  -1 318.757 23.4136   1
  10  -2  -1 366.116 21.5746   2
 -10  -2   1 358.721 26.9163   1
  10  -2  -1 346.392 29.5125   3
  10   2  -1 353.255 26.2271   3
  10   2  -1 361.312 20.9780   2
  10   2  -1 334.984 21.6509   2
  10   2  -1 354.986 27.2904   1
   9  -2  -1 1.73998 2.44672   2
   9  -2  -1 -1.5084 2.16753   3
  -9  -2   1 2.39537 4.70872   1
   9  -2  -1 -0.2240 2.05031   2
   9  -2  -1 -4.9829 1.83701   1
   9   2  -1 2.29936 2.40443   2
   9   2  -1 1.18399 2.55610   3
   9   2  -1 -1.4275 2.10239   1
   9   2  -1 0.48182 2.02648   2
   8  -2  -1 41.7066 8.93680   1
   8  -2  -1 44.2188 7.94393   2
   8  -2  -1 31.1354 9.93806   3
  -8  -2   1 40.4416 10.4710   1
   8   2  -1 37.0109 9.03762   3
   8   2  -1 31.5570 6.66147   2
   8   2  -1 31.5419 9.59899   1
  -8   2   1 39.8698 9.05498   1
   8   2  -1 36.8404 7.73463   2
  -7  -2   1 39.9650 8.95713   1
   7  -2  -1 48.1247 8.18487   2
   7  -2  -1 39.7299 6.96966   2
   7  -2  -1 24.5659 8.43797   3
   7  -2  -1 27.1852 6.44230   1
  -7   2   1 29.3594 6.91871   1
   7   2  -1 37.7560 8.46612   3
   7   2  -1 32.4252 7.87962   1
   7   2  -1 44.1680 7.19027   2
   6  -2  -1 -0.7835 1.12960   1
   6  -2  -1 2.01157 2.89776   3
  -6  -2   1 4.45606 3.22742   1
   6  -2  -1 3.01231 2.09383   2
   6  -2  -1 4.18048 2.39340   2
   6   2  -1 -0.9993 1.13396   3
   6   2  -1 1.82850 1.98278   2
  -6   2   1 -1.3731 1.38989   3
   6   2  -1 1.30990 2.37321   1
  -6   2   1 1.38287 2.20999   1
  -5  -2   1 191.423 11.2785   2
   5  -2  -1 185.491 11.7710   1
   5  -2  -1 179.449 11.6584   2
   5  -2  -1 185.048 15.3762   3
  -5  -2   1 217.071 15.2222   1
   5   2  -1 207.713 14.7118   1
   5   2  -1 199.916 11.3656   2
  -5   2   1 205.649 12.1149   1
   5   2  -1 210.342 13.2728   3
  -5   2   1 173.612 15.0176   3
   4  -2  -1 711.704 27.5365   2
   4  -2  -1 645.481 31.6332   3
   4  -2  -1 699.998 26.8309   1
  -4  -2   1 646.667 29.8127   1
  -4  -2   1 750.463 26.8876   2
  -4  -2   1 714.723 28.2995   3
  -4   2   1 725.981 27.5381   2
   4   2  -1 724.253 26.7005   2
   4   2  -1 727.695 28.1492   3
  -4   2   1 694.584 32.2763   3
  -4   2   1 706.569 26.8092   1
   4   2  -1 761.382 31.1054   1
  -3  -2   1 360.269 15.1089   2
   3  -2  -1 393.610 19.7719   3
  -3  -2   1 376.097 15.6601   3
   3  -2  -1 371.278 15.9456   2
  -3  -2   1 369.636 17.9377   1
   3  -2  -1 345.675 14.4840   1
   3   2  -1 332.462 17.4033   1
   3   2  -1 371.462 15.4667   3
  -3   2   1 384.139 14.8011   1
  -3   2   1 381.470 19.5889   3
  -3   2   1 372.546 15.9491   2
   3   2  -1 376.209 15.3351   2
  -2  -2   1 36.3353 4.37341   1
  -2  -2   1 42.3252 3.65586   2
  -2  -2   1 42.3277 3.13697   3
   2  -2  -1 44.2155 2.83534   1
   2  -2  -1 42.9902 5.13553   3
   2  -2  -1 41.7572 3.89062   2
   2   2  -1 32.7763 2.81176   3
  -2   2   1 50.8213 4.25678   2
   2   2  -1 45.3537 4.74516   1
  -2   2   1 34.2883 5.42161   3
   2   2  -1 43.2912 3.69118   2
  -2   2   1 41.9183 2.72170   1
  -1  -2   1 966.500 38.3623   4
   1  -2  -1 941.719 37.6537   4
   1  -2  -1 923.785 36.5460   4
   1   2  -1 955.698 38.4155   4
  -1   2   1 989.153 37.7288   4
   1   2  -1 925.269 37.8209   4
   0  -2  -1 70.0709 4.20532   3
   0  -2   1 64.5796 4.53974   2
   0  -2   1 69.1385 4.03632   1
   0  -2  -1 69.0840 4.51462   2
   0  -2  -1 72.1472 4.13028   1
   0   2   1 68.4621 4.51420   2
   0   2  -1 65.5110 4.56545   2
   1  -2   1 163.041 6.46377   1
  -1  -2  -1 153.628 8.32608   1
   1  -2   1 181.444 8.95065   2
  -1  -2  -1 165.326 8.31407   2
   1   2   1 158.044 8.43403   1
   1   2   1 151.547 8.09365   2
  -1   2  -1 164.569 6.56499   1
  -1   2  -1 163.131 8.65333   2
   2  -2   1 60.6241 4.04353   1
  -2  -2  -1 59.3361 5.56371   1
   2  -2   1 58.6534 3.99067   1
   2  -2   1 70.2358 6.81965   3
   2  -2   1 63.2424 5.44401   2
  -2  -2  -1 53.9261 4.79835   2
   2   2   1 59.2155 4.99247   2
  -2   2  -1 53.2186 5.14528   2
   2   2   1 52.1402 5.33804   1
  -3  -2  -1 7.99515 2.80892   2
  -3  -2  -1 4.91606 2.70293   1
   3  -2   1 9.16900 2.99858   2
   3  -2   1 8.15142 2.29057   1
   3  -2   1 8.25698 3.58886   3
   3   2   1 7.68168 2.91156   1
   3   2   1 9.05102 2.73534   2
  -3   2  -1 6.18195 2.63983   2
   3   2   1 12.9350 3.03024   3
  -4  -2  -1 24.0276 5.50998   1
   4  -2   1 24.7276 5.13518   2
  -4  -2  -1 28.2763 5.15955   2
   4  -2   1 25.2685 6.66047   3
   4  -2   1 17.8993 4.16361   1
   4   2   1 28.3924 5.27463   3
   4   2   1 40.3564 7.68386   1
   4   2   1 26.2824 4.88777   2
   5  -2   1 290.718 15.6058   1
  -5  -2  -1 271.145 17.5819   1
  -5  -2  -1 270.215 15.4629   2
   5  -2   1 282.816 16.3467   2
   5  -2   1 272.564 19.5358   3
   5   2   1 302.554 16.9978   3
   5   2   1 273.016 17.7461   1
   5   2   1 278.590 15.4589   2
   6  -2   1 394.355 25.5320   3
  -6  -2  -1 338.442 21.8200   1
   6  -2   1 386.212 20.3186   1
   6  -2   1 410.197 21.4524   2
   6  -2   1 380.621 20.2741   2
   6   2   1 370.093 25.6413   1
   6   2   1 380.970 21.5706   3
   6   2   1 350.216 19.2468   2
   7  -2   1 706.485 38.4724   3
   7  -2   1 666.244 31.8976   2
   7  -2   1 690.733 31.8134   1
  -7  -2  -1 645.173 34.1362   1
   7  -2   1 668.263 31.0525   2
   7   2   1 707.307 34.0941   3
   7   2   1 641.576 30.0052   2
   7   2   1 627.549 33.9824   1
   8  -2   1 254.313 17.3915   2
  -8  -2  -1 261.945 20.9692   1
   8  -2   1 282.855 23.7561   3
   8  -2   1 257.102 18.3783   2
   8   2   1 260.937 20.9769   1
   8   2   1 256.759 19.8818   3
   8   2   1 226.330 16.2904   2
   9  -2   1 27.3504 8.13524   1
   9  -2   1 26.6970 7.24551   2
   9  -2   1 23.3846 6.78069   2
   9  -2   1 31.8897 10.8961   3
   9   2   1 26.5043 8.00015   3
   9   2   1 40.2913 9.24677   2
   9   2   1 25.0900 8.78694   1
   9   2   1 37.1693 8.14899   2
  10  -2   1 302.815 20.8784   2
  10  -2   1 277.509 22.2049   1
  10  -2   1 324.648 24.1591   1
  10  -2   1 310.585 22.3421   2
  10  -2   1 292.708 27.8076   3
  10   2   1 306.198 24.6996   3
  10   2   1 337.568 21.4950   2
  10   2   1 323.875 22.6081   2
  11  -2   1 56.2304 12.0991   2
  11  -2   1 71.2594 14.9410   1
  11  -2   1 53.4725 10.5889   2
  11  -2   1 47.3101 15.0006   3
  11  -2   1 50.3733 11.0505   1
  11   2   1 56.9377 12.3170   2
  11   2   1 48.7262 10.2634   2
  11   2   1 70.6158 15.0983   1
  11   2   1 71.4804 14.9211   3
  12  -2   1 118.738 17.7417   2
  12  -2   1 82.7920 15.7034   1
  12  -2   1 118.104 13.3315   2
  12  -2   1 99.6351 19.6004   3
  12  -2   1 109.469 18.4264   1
  12   2   1 108.282 12.7321   2
  12   2   1 99.7724 20.7680   3
  12   2   1 100.705 15.8795   2
  13  -2   1 -0.7851 2.82569   3
  13  -2   1 1.05752 2.63907   2
  13  -2   1 6.03292 5.47616   1
  13  -2   1 -0.7361 3.11978   2
  13   2   1 7.72715 6.48236   3
  13   2   1 5.95673 6.81203   1
  13   2   1 7.89445 4.56907   2
  13   2   1 5.49872 3.85927   2
  13  -3  -1 9.30668 6.37232   1
  13  -3  -1 40.2403 14.2988   3
  13  -3  -1 13.3359 5.44309   2
  13  -3  -1 16.5899 7.36316   1
  13   3  -1 16.3094 6.58354   2
  13   3  -1 23.3427 8.91276   3
  12  -3  -1 39.4187 14.3567   3
  12  -3  -1 18.6821 6.35163   2
  12  -3  -1 16.4200 7.85323   1
  12  -3  -1 33.1954 10.7464   1
  12  -3  -1 21.1950 6.53162   2
  12   3  -1 28.9211 9.86589   3
  12   3  -1 15.3921 5.59213   2
  12   3  -1 42.0088 9.54690   2
  11  -3  -1 438.135 28.9158   1
  11  -3  -1 455.754 26.3313   2
  11  -3  -1 504.819 28.6449   2
  11  -3  -1 425.523 36.5434   3
 -11  -3   1 529.708 35.7960   1
  11   3  -1 538.460 28.9755   2
  11   3  -1 446.726 31.1435   3
  11   3  -1 505.820 26.7888   2
  10  -3  -1 257.932 19.4703   1
  10  -3  -1 250.188 18.4122   2
 -10  -3   1 248.673 24.9411   1
  10  -3  -1 256.165 26.1387   3
  10  -3  -1 244.770 19.6218   2
  10   3  -1 195.916 18.9924   3
  10   3  -1 207.189 21.1445   1
  10   3  -1 229.142 17.5486   2
  10   3  -1 196.732 16.9734   2
  -9  -3   1 34.9671 10.7123   1
   9  -3  -1 30.4349 6.77398   2
   9  -3  -1 50.7497 10.3090   1
   9  -3  -1 45.0099 11.8289   3
   9  -3  -1 45.0073 9.32359   2
   9   3  -1 63.4759 10.2753   2
   9   3  -1 29.3434 9.57084   1
   9   3  -1 29.9437 6.89695   2
   9   3  -1 41.6269 9.90157   3
   8  -3  -1 74.2108 10.9017   2
  -8  -3   1 40.6302 10.8128   1
   8  -3  -1 82.0328 11.7579   2
   8  -3  -1 60.4925 13.0476   3
   8  -3  -1 79.8505 12.0009   1
   8   3  -1 73.6793 11.9966   3
   8   3  -1 63.3658 9.40594   2
   8   3  -1 64.6209 14.2601   1
  -7  -3   1 2.17284 2.24131   2
   7  -3  -1 2.89252 2.26195   2
   7  -3  -1 3.85918 3.15896   1
   7  -3  -1 6.47183 3.50550   2
   7  -3  -1 4.74087 4.57360   3
  -7  -3   1 -0.9269 2.12337   1
   7   3  -1 12.6434 5.88839   1
   7   3  -1 3.82794 2.76743   2
   7   3  -1 0.82646 2.49487   3
   6  -3  -1 2.44274 3.38887   3
   6  -3  -1 6.25469 2.70916   1
   6  -3  -1 3.35756 2.47673   2
  -6  -3   1 5.43127 3.96654   1
  -6  -3   1 4.75117 2.59267   2
   6   3  -1 4.67744 3.73517   1
  -6   3   1 3.27634 2.28226   1
   6   3  -1 3.73386 2.48895   2
  -6   3   1 4.07453 3.11901   3
   6   3  -1 2.57385 2.38565   3
  -5  -3   1 69.4128 6.71400   2
   5  -3  -1 71.0272 12.2407   3
  -5  -3   1 68.8984 10.6392   1
   5  -3  -1 76.0141 6.59184   1
   5  -3  -1 71.6541 7.31330   2
   5   3  -1 69.9788 6.96985   3
   5   3  -1 81.1579 12.1408   1
  -5   3   1 77.6202 6.63564   1
  -5   3   1 72.1163 11.3180   3
   5   3  -1 76.9172 7.01621   2
  -5   3   1 77.0024 7.49210   2
  -4  -3   1 47.8090 5.24743   2
  -4  -3   1 64.8754 9.72235   1
   4  -3  -1 43.3916 9.14337   3
   4  -3  -1 38.5017 4.20762   1
  -4  -3   1 45.5705 4.98629   3
   4  -3  -1 46.2379 6.71925   2
  -4   3   1 47.3569 5.69044   2
   4   3  -1 41.9183 6.08461   2
   4   3  -1 44.2982 4.74234   3
   4   3  -1 39.8772 7.52124   1
  -4   3   1 48.6037 9.67996   3
  -4   3   1 41.4299 4.36410   1
   3  -3  -1 321.813 12.2405   1
   3  -3  -1 316.249 15.2590   2
  -3  -3   1 309.199 16.8373   1
  -3  -3   1 320.096 12.8822   3
  -3  -3   1 324.579 14.7521   2
   3  -3  -1 289.709 17.7961   3
  -3   3   1 343.833 18.9146   3
   3   3  -1 332.913 12.8126   3
  -3   3   1 315.837 15.4065   2
   3   3  -1 305.767 16.7278   1
   3   3  -1 301.456 14.4206   2
  -3   3   1 323.743 12.0991   1
   2  -3  -1 77.1049 7.39221   3
   2  -3  -1 79.8760 6.15443   2
  -2  -3   1 74.9445 3.52766   3
  -2  -3   1 77.3027 6.71315   1
  -2  -3   1 70.4463 5.61404   2
  -2   3   1 72.0029 6.03058   2
  -2   3   1 72.6821 7.28066   3
   2   3  -1 72.1804 6.48574   1
   2   3  -1 74.9967 5.69159   2
   1  -3  -1 36.2631 5.47549   3
  -1  -3   1 32.2450 4.67616   2
   1  -3  -1 29.4104 4.25711   2
  -1  -3   1 35.2796 3.86652   1
  -1   3   1 33.9416 2.22505   1
  -1   3   1 22.3703 4.02665   3
  -1   3   1 32.2491 2.06460   1
  -1   3   1 30.9046 4.58367   2
   1   3  -1 37.9597 4.04751   1
   1   3  -1 31.8836 3.61602   2
   0  -3  -1 90.0822 5.30701   1
   0  -3   1 79.3699 6.01512   2
   0  -3   1 92.5000 5.37539   1
   0  -3  -1 83.5385 5.49263   3
   0   3   1 84.0388 6.08908   2
   0   3   1 92.6502 5.71876   3
   0   3  -1 81.3868 6.06598   2
   0   3  -1 95.0685 5.39830   1
   0   3   1 92.1837 5.33938   1
   1  -3   1 101.604 7.84207   3
   1  -3   1 114.190 7.73764   2
   1  -3   1 108.769 5.09902   1
  -1  -3  -1 110.204 5.01418   3
  -1  -3  -1 102.554 7.07760   1
  -1  -3  -1 112.674 7.33580   2
   1   3   1 113.057 7.31221   1
   1   3   1 109.194 4.94410   3
   1   3   1 111.825 7.27864   2
  -1   3  -1 114.102 7.81728   2
  -1   3  -1 114.801 5.25744   1
   2  -3   1 791.070 30.6574   2
   2  -3   1 832.497 33.2618   3
  -2  -3  -1 763.007 29.6886   2
   2   3   1 809.015 30.0011   2
   2   3   1 839.246 31.3923   1
  -2   3  -1 810.053 30.8598   2
   3  -3   1 157.945 12.6075   3
  -3  -3  -1 160.959 10.1184   2
   3  -3   1 163.091 10.7243   2
  -3  -3  -1 131.891 10.5014   1
   3  -3   1 165.184 8.08194   1
   3  -3   1 149.757 7.75718   1
   3   3   1 161.452 8.18665   3
   3   3   1 147.164 10.9272   1
  -3   3  -1 177.129 11.1709   2
   3   3   1 150.285 9.88137   2
   4  -3   1 174.143 12.1947   2
  -4  -3  -1 193.647 13.8028   1
   4  -3   1 197.011 10.5844   1
   4  -3   1 189.102 10.2984   1
   4  -3   1 194.026 15.4059   3
  -4  -3  -1 190.945 11.9905   2
   4   3   1 182.915 10.6517   3
   4   3   1 183.902 11.7282   2
   4   3   1 187.741 13.6412   1
  -4   3  -1 194.105 12.7468   2
   5  -3   1 43.1274 6.40418   1
   5  -3   1 37.2397 7.40148   2
  -5  -3  -1 41.2070 7.06701   2
  -5  -3  -1 43.6823 8.68962   1
   5  -3   1 42.1801 10.2822   3
   5   3   1 36.4542 6.21773   3
   5   3   1 32.2618 6.26636   2
   5   3   1 37.5411 7.80330   1
  -6  -3  -1 52.7885 10.5825   1
  -6  -3  -1 75.8359 8.24502   2
   6  -3   1 70.8711 13.3743   3
   6  -3   1 68.4347 7.25285   1
   6   3   1 65.4450 7.76176   3
   6   3   1 61.9224 9.13533   2
   6   3   1 65.0461 11.1085   1
   7  -3   1 9.24563 5.26963   2
   7  -3   1 18.7642 5.62172   1
  -7  -3  -1 10.2874 4.21836   2
  -7  -3  -1 13.1594 5.95934   1
   7  -3   1 19.2413 6.49764   2
   7  -3   1 7.94650 5.84220   3
   7   3   1 3.73919 3.90284   1
   7   3   1 13.1762 5.12523   3
   7   3   1 9.90686 4.22358   2
   8  -3   1 69.2739 11.0920   1
   8  -3   1 45.6545 9.58353   2
   8  -3   1 80.0204 15.7388   3
   8  -3   1 73.0429 13.0208   2
  -8  -3  -1 54.0256 11.7715   1
   8   3   1 36.8872 10.6726   1
   8   3   1 58.4681 10.9359   3
   8   3   1 53.7829 9.45243   2
   9  -3   1 3.09756 3.49879   2
   9  -3   1 2.81894 3.11730   1
   9  -3   1 1.74573 2.17851   2
   9  -3   1 14.5126 7.84176   3
   9  -3   1 2.47395 3.51063   1
  -9  -3  -1 0.42619 4.36820   1
   9   3   1 7.23651 3.59223   2
   9   3   1 4.96939 4.24328   1
   9   3   1 2.27410 3.17276   3
  10  -3   1 10.9452 6.43433   3
  10  -3   1 8.66880 5.26328   2
  10  -3   1 8.01052 4.75415   2
  10  -3   1 6.92169 5.45526   1
  10  -3   1 -0.8588 4.61694   1
  10   3   1 9.85084 6.19549   1
  10   3   1 6.86613 4.89667   2
  10   3   1 10.6661 5.14732   2
  10   3   1 6.84510 5.02521   3
  11  -3   1 689.065 36.3153   2
  11  -3   1 742.366 39.0626   2
  11  -3   1 680.143 38.3125   1
  11  -3   1 740.181 48.9980   3
  11  -3   1 702.477 39.2839   1
  11   3   1 707.009 40.5775   3
  11   3   1 686.193 35.9931   2
  11   3   1 733.231 38.6125   2
  12  -3   1 -2.2534 2.49395   1
  12  -3   1 3.58883 4.13203   2
  12  -3   1 8.64464 7.73276   3
  12  -3   1 1.92793 3.53933   2
  12  -3   1 16.8306 7.15465   1
  12   3   1 1.77156 3.82534   3
  12   3   1 2.53654 2.96686   2
  12   3   1 7.19897 5.14783   2
  13  -3   1 0.84612 3.83995   1
  13  -3   1 14.7473 8.30088   2
  13  -3   1 9.78139 8.12806   3
  13  -3   1 6.56719 5.13531   1
  13  -3   1 20.0176 7.85675   2
  13   3   1 25.1582 8.54997   2
  13   3   1 30.8384 10.8861   3
  13  -4  -1 1.36949 5.28420   1
  13  -4  -1 6.83276 4.49226   2
  13  -4  -1 5.40305 6.22356   1
  13  -4  -1 2.05545 5.11582   3
  13   4  -1 1.35855 3.20445   3
  13   4  -1 2.74935 2.98326   2
  12  -4  -1 89.2032 15.2081   1
  12  -4  -1 88.5644 21.4949   3
  12  -4  -1 91.5291 14.2235   2
  12  -4  -1 60.8907 12.1185   1
  12  -4  -1 110.482 12.0385   2
  12   4  -1 83.3160 15.2335   3
  12   4  -1 90.5303 10.6471   2
  12   4  -1 88.5000 13.7537   2
  11  -4  -1 57.9477 12.7490   1
  11  -4  -1 63.7414 11.8244   1
 -11  -4   1 43.5294 12.3873   1
  11  -4  -1 60.3162 16.7192   3
  11  -4  -1 61.2622 11.1422   2
  11  -4  -1 85.0523 13.3592   2
  11   4  -1 57.4006 9.90890   2
  11   4  -1 51.0681 11.6254   3
  11   4  -1 52.4325 11.0047   2
  10  -4  -1 157.960 24.9841   3
  10  -4  -1 147.709 13.8474   2
  10  -4  -1 153.871 14.2615   1
  10  -4  -1 165.585 15.3042   2
 -10  -4   1 138.894 20.7566   1
  10  -4  -1 158.813 15.0311   1
  10   4  -1 159.068 14.0590   2
  10   4  -1 176.329 19.4716   1
  10   4  -1 177.383 15.7506   2
  10   4  -1 157.050 15.4314   3
   9  -4  -1 4.66974 3.85294   2
   9  -4  -1 4.04318 3.53639   2
  -9  -4   1 -0.6481 4.04360   1
   9  -4  -1 4.77977 4.09455   1
   9  -4  -1 7.90833 5.44063   3
   9   4  -1 -0.8508 1.47704   2
   9   4  -1 -2.9274 2.28040   1
   9   4  -1 1.65238 3.15254   3
   8  -4  -1 226.815 16.5900   2
   8  -4  -1 212.732 15.2594   1
   8  -4  -1 238.621 16.1923   2
   8  -4  -1 252.804 23.3420   3
  -8  -4   1 191.073 19.1326   1
  -8  -4   1 209.663 15.1479   2
   8   4  -1 226.016 15.3907   2
   8   4  -1 194.925 19.3588   1
   7  -4  -1 48.4658 8.97419   2
  -7  -4   1 49.5269 8.10648   2
  -7  -4   1 49.8276 11.6206   1
   7  -4  -1 27.8357 8.71563   3
   7  -4  -1 44.1032 7.62477   1
   7   4  -1 55.1804 8.52239   2
   7   4  -1 31.8443 6.75883   3
   7   4  -1 37.3312 9.18994   1
  -6  -4   1 3.84994 3.44462   1
   6  -4  -1 3.07098 3.39665   3
   6  -4  -1 6.08843 3.22812   2
   6  -4  -1 5.91566 2.54356   1
  -6  -4   1 3.93948 2.50148   2
  -6   4   1 8.78581 5.00651   3
   6   4  -1 4.98042 3.40252   1
  -6   4   1 6.89001 3.44480   2
   6   4  -1 6.69515 3.03288   3
   6   4  -1 0.66093 2.09493   2
   5  -4  -1 1573.42 52.6297   1
   5  -4  -1 1548.26 64.2999   3
   5  -4  -1 1597.91 57.4146   2
  -5  -4   1 1562.28 61.2197   1
  -5  -4   1 1616.41 56.1472   2
  -5   4   1 1629.29 57.8351   2
  -5   4   1 1541.72 64.0058   3
   5   4  -1 1597.80 53.7240   3
   5   4  -1 1539.23 60.8838   1
   5   4  -1 1665.86 56.3831   2
  -4   4   1 3014.62 104.736   3
   3  -4  -1 763.354 30.7624   2
   3  -4  -1 801.754 35.0746   3
  -3  -4   1 755.016 32.6236   1
  -3  -4   1 787.472 30.4068   2
   3   4  -1 796.582 30.1900   2
   3   4  -1 815.862 33.0875   1
  -3   4   1 789.125 31.3570   2
  -3   4   1 760.225 34.4970   3
  -2  -4   1 72.9101 6.26756   2
  -2  -4   1 64.1133 6.48107   1
   2  -4  -1 62.7161 7.12266   3
   2  -4  -1 59.9269 5.91460   2
  -2   4   1 55.9733 6.88259   3
  -2   4   1 60.2516 6.10558   2
   2   4  -1 59.9599 6.27192   1
   2   4  -1 54.6135 5.57621   2
   1  -4  -1 161.414 9.88218   2
  -1  -4   1 148.949 7.26709   3
  -1  -4   1 151.166 9.46081   2
   1  -4  -1 146.301 9.98674   3
  -1  -4   1 151.649 9.30630   1
  -1   4   1 143.122 9.93322   3
  -1   4   1 154.448 7.19389   1
   1   4  -1 166.183 9.58582   1
  -1   4   1 151.672 9.58505   2
   1   4  -1 163.552 9.72221   2
   0  -4  -1 348.516 16.2239   2
   0  -4  -1 373.009 15.3959   3
   0  -4  -1 345.127 14.4803   1
   0  -4   1 343.482 15.5613   3
   0  -4   1 343.930 14.4654   1
   0  -4   1 349.691 16.4970   2
   0   4  -1 345.624 14.4569   1
   0   4  -1 373.981 16.7304   2
   0   4   1 347.926 15.1962   3
   0   4   1 350.978 14.4296   1
   0   4   1 348.659 16.2375   2
  -1  -4  -1 572.361 19.5118   3
  -1  -4  -1 570.884 23.3328   2
  -1  -4  -1 556.057 22.7650   1
   1  -4   1 551.556 23.5786   2
   1  -4   1 575.402 19.4250   1
   1  -4   1 561.717 24.3584   3
  -1   4  -1 578.264 19.6414   1
   1   4   1 546.879 22.9602   2
   1   4   1 561.291 21.3302   3
  -1   4  -1 571.588 23.8929   2
   1   4   1 541.303 22.4905   1
   2  -4   1 8.19708 2.78684   2
   2  -4   1 18.1088 4.98903   3
  -2  -4  -1 10.9768 3.73737   1
  -2  -4  -1 10.7879 3.55853   2
   2   4   1 11.2061 3.27708   1
   2   4   1 14.1424 3.82875   2
  -3  -4  -1 1681.00 61.6445   1
   3  -4   1 1809.85 61.2677   2
   3  -4   1 1734.48 64.9192   3
   3   4   1 1709.21 61.5758   1
   4  -4   1 955.301 33.3026   1
  -4  -4  -1 971.374 37.9028   2
  -4  -4  -1 982.775 40.8416   1
   4  -4   1 969.822 39.0878   2
   4  -4   1 972.551 43.8032   3
   4  -4   1 959.061 33.2648   1
  -4   4  -1 1009.41 39.6204   2
   4   4   1 973.522 33.5163   3
   4   4   1 937.343 40.3658   1
   4   4   1 979.956 37.9830   2
   5  -4   1 247.275 16.0953   2
   5  -4   1 222.638 18.7441   3
  -5  -4  -1 249.321 17.5930   1
  -5  -4  -1 231.487 14.8558   2
   5  -4   1 228.385 12.2104   1
   5  -4   1 220.962 12.2019   1
   5   4   1 248.933 15.2015   2
   5   4   1 218.554 12.5134   3
   5   4   1 222.397 17.0414   1
  -5   4  -1 244.491 16.0663   2
   6  -4   1 17.7183 5.55639   2
  -6  -4  -1 22.8431 6.58114   2
   6  -4   1 25.8547 8.65719   3
  -6  -4  -1 19.3452 6.10432   1
   6  -4   1 29.8590 5.48404   1
   6  -4   1 28.8877 5.83759   1
   6   4   1 21.3237 5.09664   3
   6   4   1 29.7477 6.45055   2
   6   4   1 19.4425 6.10961   1
   7  -4   1 86.9566 10.5867   2
   7  -4   1 75.1113 14.0401   3
   7  -4   1 95.9027 9.33330   1
  -7  -4  -1 96.8098 16.0046   1
  -7  -4  -1 97.0512 10.2384   2
   7  -4   1 102.727 9.37154   1
   7   4   1 85.8261 9.60896   2
   7   4   1 84.2741 9.25641   3
   7   4   1 88.4145 13.6855   1
   8  -4   1 8.67411 6.22207   3
   8  -4   1 10.3072 4.56520   1
   8  -4   1 9.96464 4.46945   1
   8  -4   1 16.4499 6.36282   2
   8  -4   1 18.9673 6.46391   2
  -8  -4  -1 12.1851 4.96545   2
  -8  -4  -1 3.50300 5.09279   1
   8   4   1 6.69578 5.53665   1
   8   4   1 8.61497 4.53091   3
  -9  -4  -1 15.8608 7.63080   1
   9  -4   1 20.5868 6.92839   2
   9  -4   1 27.0862 7.85942   2
   9  -4   1 17.0972 6.93998   1
   9  -4   1 28.1171 10.9759   3
   9  -4   1 15.6459 5.53211   1
   9   4   1 12.8400 5.21266   3
   9   4   1 26.7893 9.84086   1
   9   4   1 16.7020 5.56106   2
  10  -4   1 515.217 29.9507   2
  10  -4   1 581.753 30.9640   1
  10  -4   1 525.443 31.5573   2
  10  -4   1 505.930 29.2418   1
  10  -4   1 534.553 40.0231   3
  10   4   1 511.612 35.7950   1
  10   4   1 528.857 31.0900   3
  10   4   1 536.503 29.7743   2
  11  -4   1 96.1000 15.1150   2
  11  -4   1 102.211 15.8832   1
  11  -4   1 133.492 14.6313   1
  11  -4   1 95.5517 15.7943   2
  11  -4   1 142.992 26.8008   3
  11   4   1 104.271 16.2570   2
  11   4   1 102.727 16.3726   3
  11   4   1 134.161 14.1316   2
  12  -4   1 67.0184 13.1109   1
  12  -4   1 87.8856 15.7001   2
  12  -4   1 68.8487 17.6219   3
  12  -4   1 88.5219 14.4337   2
  12  -4   1 100.252 16.0140   1
  12   4   1 72.7609 12.7787   2
  12   4   1 67.4114 13.4382   2
  12   4   1 100.228 16.9606   3
  13  -4   1 3.05920 3.49799   2
  13  -4   1 0.16285 2.74168   1
  13  -4   1 0.79761 5.45931   1
  13  -4   1 1.62389 4.62826   3
  13   4   1 4.65503 4.67742   3
  13   4   1 1.45869 3.04134   2
  13  -5  -1 14.9303 9.72834   3
  13  -5  -1 9.20415 4.89992   2
  13  -5  -1 16.6505 6.72606   1
  13   5  -1 6.50353 4.54671   2
  13   5  -1 20.9504 7.55987   3
  12  -5  -1 24.4782 7.31818   2
  12  -5  -1 12.3832 5.35057   2
  12  -5  -1 48.9445 17.0162   3
  12  -5  -1 18.5303 6.92758   1
  12  -5  -1 23.2716 7.46902   1
  12   5  -1 16.5120 6.36635   2
  12   5  -1 19.9127 7.25512   3
  12   5  -1 27.3845 8.37715   2
  11  -5  -1 95.6753 11.3733   1
  11  -5  -1 94.2479 20.8959   3
  11  -5  -1 98.6344 11.9941   2
  11  -5  -1 115.922 16.4841   2
  11  -5  -1 95.4979 14.0504   1
 -11  -5   1 78.4328 17.0216   1
  11   5  -1 105.659 11.5745   2
  11   5  -1 119.464 13.6389   2
  11   5  -1 83.7110 13.4832   3
  10  -5  -1 3.31474 3.40439   1
  10  -5  -1 5.72521 7.21416   3
  10  -5  -1 -1.9740 2.25711   1
  10  -5  -1 4.82228 4.27818   2
 -10  -5   1 -1.9060 2.32945   1
  10  -5  -1 -2.4617 2.52239   2
  10   5  -1 -0.5177 2.23438   3
  10   5  -1 1.28493 1.97665   2
  10   5  -1 -1.0564 2.43570   1
   9  -5  -1 127.991 12.9580   2
   9  -5  -1 136.472 11.6282   1
   9  -5  -1 132.206 12.7645   2
  -9  -5   1 118.245 27.7716   1
   9  -5  -1 118.597 11.3682   1
   9   5  -1 124.285 11.8523   3
   9   5  -1 137.608 21.9023   1
   8  -5  -1 18.4277 6.39162   2
   8  -5  -1 19.2990 8.62532   3
  -8  -5   1 19.0366 7.90663   1
   8  -5  -1 18.9518 5.21368   1
  -8  -5   1 13.4451 5.21493   2
   8  -5  -1 28.9100 6.41370   1
   8   5  -1 13.5892 7.78851   1
   8   5  -1 8.99290 4.38005   2
   8   5  -1 18.0700 5.32325   3
   7  -5  -1 117.469 18.3757   3
  -7  -5   1 148.841 15.7278   1
   7  -5  -1 143.072 10.1797   1
  -7  -5   1 144.155 12.2599   2
   7  -5  -1 139.802 12.8135   2
   7   5  -1 168.500 16.5535   1
   7   5  -1 153.333 12.3980   2
   7   5  -1 155.577 11.1529   3
  -7   5   1 167.522 13.8822   2
   6  -5  -1 21.4720 6.63890   2
   6  -5  -1 25.1702 4.48991   1
  -6  -5   1 31.5917 6.56025   2
   6  -5  -1 37.9131 11.4006   3
  -6  -5   1 24.3117 7.60659   1
  -6   5   1 18.7558 7.28312   3
   6   5  -1 21.7999 6.42412   1
   6   5  -1 24.0407 5.90726   2
  -6   5   1 23.6989 6.44080   2
   6   5  -1 33.6754 5.41554   3
  -5  -5   1 392.974 19.9699   2
  -5  -5   1 358.504 22.8028   1
   5  -5  -1 347.396 14.6407   1
   5  -5  -1 409.155 26.2097   3
   5  -5  -1 346.804 19.9313   2
   5  -5  -1 369.949 14.9751   1
   5   5  -1 396.975 19.7796   2
  -5   5   1 361.373 20.5654   2
  -5   5   1 368.019 24.9707   3
   5   5  -1 369.885 22.8569   1
   5   5  -1 359.168 15.2503   3
  -4   5   1 3932.69 133.370   3
  -3  -5   1 1652.29 60.4033   1
  -3  -5   1 1702.87 58.1265   2
   3   5  -1 1603.57 59.8064   1
  -3   5   1 1650.96 59.0301   2
   3   5  -1 1635.87 57.5348   2
  -3   5   1 1675.84 62.9621   3
   2  -5  -1 322.412 16.8039   2
  -2  -5   1 315.710 16.8325   1
   2  -5  -1 307.252 18.1468   3
  -2  -5   1 311.327 16.1173   2
   2   5  -1 307.158 16.6784   1
  -2   5   1 336.561 18.7282   3
   2   5  -1 297.343 15.8827   2
  -2   5   1 302.492 16.5671   2
  -1  -5   1 467.904 21.1254   2
   1  -5  -1 434.800 21.2559   3
  -1  -5   1 473.702 17.9192   3
   1  -5  -1 467.208 17.0011   1
   1  -5  -1 472.207 21.3336   2
  -1  -5   1 464.895 20.3948   1
   1   5  -1 484.591 20.4915   1
   1   5  -1 444.011 20.7839   2
  -1   5   1 466.958 16.7689   1
  -1   5   1 432.417 20.7830   2
  -1   5   1 454.919 21.5837   3
   0  -5  -1 39.5373 4.58989   3
   0  -5   1 47.8285 7.08817   2
   0  -5  -1 30.5545 5.14726   2
   0  -5   1 47.0493 4.52124   1
   0  -5   1 41.3128 6.14561   3
   0  -5  -1 36.7901 4.15790   1
   0   5  -1 33.0140 3.94036   1
   0   5   1 35.7770 5.48090   3
   0   5   1 32.9007 3.85412   1
   0   5   1 47.1642 5.62902   2
   0   5  -1 39.1625 6.68939   2
  -1  -5  -1 18.4292 4.55520   2
   1  -5   1 14.3363 4.41009   3
  -1  -5  -1 14.4652 3.85880   1
   1  -5   1 26.9075 3.69668   1
  -1  -5  -1 19.0086 3.19433   3
   1  -5   1 15.5002 4.06745   2
  -1   5  -1 27.1949 3.68372   1
   1   5   1 20.6619 4.48922   2
  -1   5  -1 22.3660 5.39636   2
   1   5   1 20.5221 4.14362   1
   1   5   1 22.3635 2.82393   3
  -2  -5  -1 436.095 21.2439   2
   2  -5   1 474.949 15.5016   1
   2  -5   1 430.780 23.3643   3
   2  -5   1 478.050 22.3795   2
  -2  -5  -1 447.735 21.7560   1
  -2   5  -1 442.542 15.6823   1
   2   5   1 450.354 21.2125   2
  -2   5  -1 468.203 22.4753   2
   2   5   1 449.222 21.5755   1
   3  -5   1 45.5944 8.97667   3
  -3  -5  -1 43.2587 7.06055   2
   3  -5   1 57.5310 8.94530   2
  -3  -5  -1 44.2341 8.44240   1
   3   5   1 43.6911 7.30042   2
  -3   5  -1 39.0250 6.96437   2
   3   5   1 46.6385 8.33380   1
   4   5   1 3104.72 102.528   2
   5  -5   1 200.106 18.1118   3
  -5  -5  -1 172.409 15.2332   1
   5  -5   1 180.105 9.69680   1
   5  -5   1 183.140 14.3019   2
   5  -5   1 179.368 9.77767   1
  -5   5  -1 204.338 15.0896   2
   5   5   1 199.145 13.8856   2
   5   5   1 180.726 9.74208   3
   5   5   1 190.031 15.6957   1
   6  -5   1 0.34520 1.58293   1
   6  -5   1 1.82609 1.97015   1
  -6  -5  -1 -0.0501 1.31316   2
   6  -5   1 0.73382 2.04019   3
  -6  -5  -1 -1.1720 2.20855   1
   6  -5   1 2.50382 2.79122   2
   6   5   1 2.52305 2.27479   2
   6   5   1 2.86476 2.89984   1
  -6   5  -1 1.17081 2.64573   2
   6   5   1 1.55724 1.80841   3
  -7  -5  -1 433.701 23.8895   2
   7  -5   1 383.034 19.4899   1
   7  -5   1 403.360 19.7133   1
   7  -5   1 372.999 23.7319   2
   7  -5   1 377.362 29.2464   3
  -7  -5  -1 426.148 27.5969   1
   7   5   1 402.586 20.3099   3
   7   5   1 389.807 26.7913   1
   7   5   1 360.093 22.1922   2
  -8  -5  -1 0.20312 4.56023   1
   8  -5   1 2.94176 2.89983   1
   8  -5   1 9.07049 3.93942   1
   8  -5   1 6.23878 4.07772   2
   8  -5   1 7.32990 6.05240   3
  -8  -5  -1 4.60140 4.04902   2
   8   5   1 -3.4536 2.37859   1
   8   5   1 7.93124 4.10220   3
   8   5   1 6.47750 4.32347   2
   9  -5   1 48.2510 10.8109   2
   9  -5   1 42.6486 9.35073   2
  -9  -5  -1 50.2325 12.9546   1
   9  -5   1 47.2652 8.69462   1
   9  -5   1 50.7107 17.0805   3
   9  -5   1 43.2894 8.55511   1
   9   5   1 60.1826 10.4070   3
   9   5   1 39.2188 11.7861   1
   9   5   1 31.3663 7.84372   2
  10  -5   1 67.2558 17.9184   3
  10  -5   1 83.6980 14.0132   2
  10  -5   1 69.7691 13.3214   2
  10  -5   1 77.4741 12.0952   1
  10  -5   1 79.1405 11.9453   1
  10   5   1 55.3161 10.9865   3
  10   5   1 59.2291 11.2224   2
  11  -5   1 223.274 20.5936   2
  11  -5   1 279.586 30.2911   3
  11  -5   1 255.029 19.3200   1
  11  -5   1 263.782 19.5546   1
  11  -5   1 251.666 20.4967   2
  11   5   1 243.672 19.8765   2
  11   5   1 266.912 22.2238   2
  11   5   1 249.853 20.0666   3
  12  -5   1 70.3411 12.3540   1
  12  -5   1 59.8542 12.4668   2
  12  -5   1 75.6417 13.7906   2
  12  -5   1 68.3695 12.1467   1
  12  -5   1 48.6873 15.1655   3
  12   5   1 75.0428 14.0603   2
  12   5   1 83.6250 14.4204   3
  12   5   1 53.3158 11.0274   2
  13  -5   1 1.81302 3.50995   2
  13  -5   1 5.88348 4.46159   1
  13  -5   1 3.36722 6.59732   3
  13   5   1 8.30401 5.65482   2
  13   5   1 1.15606 3.24721   3
  13  -6  -1 3.53930 5.74203   3
  13  -6  -1 2.81031 2.93029   2
  13  -6  -1 6.38013 4.19321   1
  13   6  -1 0.70911 2.38543   3
  13   6  -1 4.00362 3.90849   2
  12  -6  -1 3.63880 3.15899   2
  12  -6  -1 -0.4026 2.01848   1
  12  -6  -1 3.85165 5.53928   3
  12  -6  -1 1.52590 3.05088   2
  12  -6  -1 2.50480 3.08343   1
  12   6  -1 1.33046 3.26222   2
  12   6  -1 -0.9179 2.28957   2
  12   6  -1 2.66420 2.92814   3
  11  -6  -1 10.7965 5.62505   2
  11  -6  -1 11.9936 5.10599   1
 -11  -6   1 21.7951 10.6232   1
  11  -6  -1 13.5622 6.02890   2
  11  -6  -1 1.53711 5.07437   3
  11  -6  -1 9.23604 4.50406   1
  11   6  -1 11.3945 5.08403   2
  11   6  -1 18.4501 6.06579   3
 -10  -6   1 10.6612 6.72339   1
  10  -6  -1 8.35561 5.06979   2
  10  -6  -1 13.8300 4.99694   1
  10  -6  -1 2.91769 3.92202   2
  10  -6  -1 7.61785 7.22831   3
  10  -6  -1 10.3045 4.54427   1
  10   6  -1 5.34452 4.54896   3
  10   6  -1 9.54017 4.63553   2
  -9  -6   1 40.8473 9.22978   2
   9  -6  -1 34.0767 6.80588   1
  -9  -6   1 46.5506 12.1987   1
   9  -6  -1 40.6888 7.41403   1
   9  -6  -1 49.3509 15.0883   3
   9  -6  -1 36.6762 8.83686   2
   9   6  -1 25.1420 8.44326   1
   9   6  -1 43.0923 9.04382   2
   9   6  -1 38.3018 7.65136   3
   8  -6  -1 12.3144 4.93241   2
   8  -6  -1 31.3162 11.9597   3
  -8  -6   1 29.3736 7.20678   2
  -8  -6   1 26.0781 8.36625   1
   8  -6  -1 26.8390 5.86204   1
   8  -6  -1 35.4825 6.36117   1
   8   6  -1 29.6130 5.93033   3
   8   6  -1 20.2786 8.19136   1
   7  -6  -1 806.587 30.0922   1
   7  -6  -1 730.968 44.7131   3
   7  -6  -1 822.897 37.7706   2
   7  -6  -1 816.805 30.2923   1
  -7  -6   1 826.564 36.6742   2
  -7  -6   1 814.943 42.5211   1
   7   6  -1 850.222 42.9645   1
   7   6  -1 812.671 30.6744   3
  -7   6   1 760.894 37.8929   2
   7   6  -1 790.748 35.7659   2
   6  -6  -1 128.719 7.26944   1
  -6  -6   1 138.477 11.9577   2
   6  -6  -1 127.941 7.23831   1
   6  -6  -1 127.903 12.0017   2
  -6  -6   1 133.113 14.2891   1
   6  -6  -1 146.851 16.6587   3
  -6   6   1 138.685 12.7923   2
   6   6  -1 166.416 12.6240   2
   6   6  -1 114.172 7.15942   3
   6   6  -1 107.238 12.8292   1
   5  -6  -1 420.153 23.2253   2
  -5  -6   1 443.768 26.3638   1
  -5  -6   1 400.394 24.7527   2
   5  -6  -1 492.094 29.9317   3
  -5   6   1 422.457 23.7887   2
   5   6  -1 425.372 22.2643   2
   5   6  -1 473.786 26.6931   1
  -5   6   1 436.932 28.2566   3
  -4  -6   1 2372.20 83.3480   2
   4  -6  -1 2440.17 90.8975   3
  -4   6   1 2448.79 85.4200   2
  -4   6   1 2533.92 91.3263   3
   4   6  -1 2413.37 83.2579   2
   4   6  -1 2526.37 87.5459   1
  -3  -6   1 412.323 22.6892   1
   3  -6  -1 437.885 25.0309   3
  -3  -6   1 430.290 21.4491   2
   3  -6  -1 450.533 22.3300   2
  -3   6   1 390.881 21.6337   2
   3   6  -1 431.986 22.7341   1
  -3   6   1 415.985 24.4517   3
   3   6  -1 380.979 20.5396   2
   2  -6  -1 1.57962 2.41495   3
   2  -6  -1 3.30264 2.56714   2
  -2  -6   1 2.36729 2.18511   1
  -2  -6   1 0.23665 1.51821   2
  -2  -6   1 3.46552 1.26710   3
  -2   6   1 2.46841 2.11889   2
   2   6  -1 4.61004 2.72976   2
   2   6  -1 -1.0865 1.18067   1
  -2   6   1 5.71647 3.35336   3
  -1  -6   1 207.858 12.1351   1
  -1  -6   1 175.855 9.65165   3
   1  -6  -1 179.017 8.98206   1
   1  -6  -1 153.959 11.7186   2
  -1  -6   1 184.088 12.4460   2
   1  -6  -1 157.331 11.8956   3
  -1   6   1 172.699 8.64108   1
  -1   6   1 160.714 11.8516   2
  -1   6   1 170.199 12.2603   3
   1   6  -1 173.352 11.2571   1
   1   6  -1 166.107 11.9254   2
   0  -6  -1 1190.13 43.6669   3
   0  -6   1 1237.93 44.5015   3
   0  -6  -1 1173.37 45.5984   2
   0  -6   1 1218.49 46.2585   2
   0   6   1 1275.92 44.3095   3
   0   6   1 1237.59 42.4677   1
   0   6   1 1237.13 46.0826   2
   0   6  -1 1215.99 46.0539   2
  -1  -6  -1 582.529 24.5040   1
  -1  -6  -1 529.236 20.9906   3
  -1  -6  -1 537.628 24.9872   2
   1  -6   1 498.085 25.0489   2
   1  -6   1 535.539 20.4489   1
   1  -6   1 548.565 25.8920   3
   1   6   1 558.984 21.3675   3
  -1   6  -1 564.513 20.7809   1
  -1   6  -1 567.337 25.9860   2
   1   6   1 545.614 25.1934   2
   1   6   1 542.922 23.7826   1
   2  -6   1 219.182 8.69272   1
  -2  -6  -1 217.095 14.1687   1
  -2  -6  -1 210.912 13.9247   2
   2  -6   1 197.504 14.0211   2
   2  -6   1 223.477 15.9124   3
   2   6   1 206.977 13.7527   1
   2   6   1 183.483 13.0794   2
  -2   6  -1 194.822 11.3712   1
  -2   6  -1 212.801 14.5821   2
  -3  -6  -1 2506.17 87.6605   1
   3   6   1 2547.96 87.6018   1
  -4  -6  -1 365.636 22.8807   1
   4  -6   1 400.646 22.6203   2
  -4  -6  -1 374.369 22.0561   2
   4  -6   1 404.033 26.1250   3
  -4   6  -1 445.020 23.7786   2
   4   6   1 383.571 21.1549   2
   4   6   1 394.624 23.6246   1
   5  -6   1 292.178 11.8277   1
   5  -6   1 268.751 22.2110   3
  -5  -6  -1 311.752 18.8232   2
   5  -6   1 287.765 11.7812   1
   5  -6   1 278.980 18.8796   2
  -5  -6  -1 278.989 20.2180   1
   5   6   1 268.305 17.5995   2
  -5   6  -1 282.655 19.2254   2
   5   6   1 267.660 19.7764   1
  -6  -6  -1 276.737 18.2577   2
   6  -6   1 258.674 12.3835   1
   6  -6   1 248.833 22.5541   3
   6  -6   1 266.767 18.9222   2
  -6  -6  -1 291.497 21.4696   1
   6  -6   1 249.658 12.2163   1
   6   6   1 236.844 17.0576   2
   6   6   1 246.989 11.9002   3
   6   6   1 222.595 19.1690   1
   7  -6   1 241.953 13.5724   1
   7  -6   1 266.338 24.6497   3
   7  -6   1 235.844 18.8441   2
   7  -6   1 238.303 13.5029   1
  -7  -6  -1 285.614 22.7536   1
  -7  -6  -1 260.585 18.6653   2
  -7   6  -1 265.296 20.0262   2
   7   6   1 256.894 21.6947   1
   7   6   1 261.181 18.5848   2
   7   6   1 258.292 13.8465   3
   8  -6   1 5.40143 5.23133   3
   8  -6   1 24.5718 7.44115   2
  -8  -6  -1 25.9355 9.50426   1
  -8  -6  -1 6.05771 4.94160   2
   8  -6   1 14.2926 4.14241   1
   8  -6   1 18.2202 4.86436   1
   8   6   1 21.0438 5.18748   3
   8   6   1 17.2639 6.17162   2
   8   6   1 14.5677 6.90722   1
   9  -6   1 48.8462 8.31489   1
   9  -6   1 38.1272 9.74212   2
   9  -6   1 62.5440 16.0242   3
  -9  -6  -1 26.7792 9.19088   1
   9  -6   1 41.6747 8.68600   1
  -9  -6  -1 39.5720 9.89440   2
   9   6   1 44.8671 12.5898   1
   9   6   1 27.1238 7.52187   2
   9   6   1 29.6764 6.54053   3
  10  -6   1 75.4764 11.1586   1
  10  -6   1 66.0758 10.3504   1
  10  -6   1 71.1798 13.7774   2
  10  -6   1 41.7901 14.0088   3
  10  -6   1 74.6088 13.5402   2
  10   6   1 78.8315 12.4405   2
  10   6   1 68.2943 10.7894   3
  11  -6   1 144.299 13.6709   1
  11  -6   1 142.608 15.6100   2
  11  -6   1 151.169 13.2251   1
  11  -6   1 146.411 16.6799   2
  11  -6   1 97.9996 21.0596   3
  11   6   1 122.022 12.4662   3
  11   6   1 134.243 14.4990   2
  12  -6   1 0.00962 2.59323   2
  12  -6   1 10.6192 5.70410   1
  12  -6   1 15.5695 5.74833   1
  12   6   1 5.06197 4.68186   2
  12   6   1 7.26376 4.23616   3
  12   6   1 10.3571 5.67952   2
  13  -6   1 22.8257 8.87362   2
  13  -6   1 18.7280 10.3638   3
  13  -6   1 15.8556 5.76043   1
  13   6   1 14.9686 8.91895   2
  13   6   1 4.36522 3.48133   3
  13  -7  -1 -1.4273 2.30054   2
  13   7  -1 -1.2777 2.33554   2
  12  -7  -1 2.80215 3.15474   2
  12  -7  -1 3.54973 2.86854   1
  12  -7  -1 14.0092 10.3968   3
  12  -7  -1 3.99001 2.98844   1
  12  -7  -1 3.28369 3.05957   2
  12   7  -1 0.65384 2.69380   2
  12   7  -1 4.04922 3.95273   2
  11  -7  -1 7.90123 4.83593   2
  11  -7  -1 12.4807 5.94940   2
  11  -7  -1 12.7542 9.26535   3
 -11  -7   1 7.61471 7.61265   1
  11  -7  -1 3.95908 2.96312   1
  11   7  -1 7.62128 3.61172   3
  11   7  -1 3.30498 3.96870   2
  10  -7  -1 10.8095 3.85214   1
  10  -7  -1 8.74988 7.61487   3
  10  -7  -1 9.94946 3.57248   1
 -10  -7   1 15.4906 6.25141   2
 -10  -7   1 -2.2932 3.22537   1
  10  -7  -1 -0.8333 2.30253   2
  10  -7  -1 11.1187 5.56521   2
  10   7  -1 6.35346 3.25591   3
  10   7  -1 4.70584 3.60541   2
   9  -7  -1 7.52655 6.15330   3
   9  -7  -1 6.35200 2.56382   1
   9  -7  -1 9.02817 3.18319   1
   9  -7  -1 3.62686 3.25595   2
  -9  -7   1 0.22895 3.64056   1
  -9  -7   1 17.3418 6.26088   2
   9   7  -1 4.98976 4.56196   1
   9   7  -1 6.06392 2.76056   3
   9   7  -1 12.3830 5.60391   2
   8  -7  -1 206.502 17.2591   2
   8  -7  -1 187.405 10.2291   1
   8  -7  -1 203.104 10.5315   1
  -8  -7   1 219.193 21.5818   1
  -8  -7   1 173.552 15.4899   2
   8  -7  -1 151.067 24.4497   3
   8   7  -1 207.761 16.2929   2
  -8   7   1 178.188 16.6420   2
  -7  -7   1 1018.03 50.8975   1
   7  -7  -1 1041.09 46.3051   2
  -7  -7   1 1035.21 44.9917   2
   7  -7  -1 1077.82 56.3955   3
  -7   7   1 1030.56 47.1598   2
   7   7  -1 1073.85 51.4891   1
   7   7  -1 1059.83 49.0417   2
  -6  -7   1 1186.00 53.1254   1
   6  -7  -1 1148.74 48.4527   2
   6  -7  -1 1014.54 54.5328   3
  -6  -7   1 1177.59 47.5870   2
   6   7  -1 1100.49 46.3756   2
   6   7  -1 1219.00 53.2145   1
  -5  -7   1 72.6472 8.82904   2
  -5  -7   1 77.7149 14.1579   1
   5  -7  -1 58.5042 11.5350   3
   5  -7  -1 64.6393 10.9946   2
  -5   7   1 65.4632 12.8693   3
   5   7  -1 72.8476 12.9937   1
  -5   7   1 79.7032 12.4965   2
   5   7  -1 87.5794 9.37063   2
  -4  -7   1 227.150 17.5133   1
   4  -7  -1 263.323 20.4745   3
   4  -7  -1 249.643 16.9197   2
  -4  -7   1 210.476 15.4069   2
  -4   7   1 252.286 17.3544   2
   4   7  -1 239.315 17.6212   1
  -4   7   1 228.478 19.0719   3
   4   7  -1 218.433 15.5034   2
   3  -7  -1 256.654 19.3021   3
   3  -7  -1 287.138 17.9852   2
  -3  -7   1 243.265 17.2938   1
  -3   7   1 277.970 17.8843   2
   3   7  -1 283.985 17.2228   2
  -3   7   1 281.191 19.9166   3
   3   7  -1 267.685 17.6776   1
   2  -7  -1 77.9663 12.4317   3
  -2  -7   1 61.4998 4.40038   3
  -2  -7   1 65.4016 7.84172   1
  -2  -7   1 60.3564 9.12195   2
   2   7  -1 68.4867 7.85797   2
  -2   7   1 67.8992 4.94944   1
  -2   7   1 85.5401 11.9497   2
  -2   7   1 57.3768 4.01068   1
   2   7  -1 54.2034 8.85674   1
  -2   7   1 70.6353 10.6607   3
  -1  -7   1 256.590 16.4068   2
   1  -7  -1 239.957 16.0193   3
   1  -7  -1 273.648 12.6781   1
  -1  -7   1 273.736 13.5824   3
   1  -7  -1 249.219 16.5484   2
  -1  -7   1 264.121 15.2786   1
  -1   7   1 253.644 16.3359   3
  -1   7   1 268.766 12.3210   1
  -1   7   1 263.465 16.6106   2
   1   7  -1 266.597 15.2133   1
   1   7  -1 247.128 16.0282   2
   0  -7   1 1739.93 61.5104   3
   0  -7  -1 1748.51 63.9230   2
   0   7   1 1687.83 63.3095   2
   0   7   1 1762.57 61.2833   3
   0   7  -1 1842.17 64.3329   2
   0   7  -1 1780.62 59.5527   1
   1  -7   1 417.965 23.2853   3
  -1  -7  -1 465.687 19.6059   3
  -1  -7  -1 488.914 29.2418   2
  -1  -7  -1 481.264 22.5758   1
   1  -7   1 471.846 18.9939   1
  -1   7  -1 478.503 24.4538   2
   1   7   1 471.189 22.0668   1
   1   7   1 458.786 19.8292   3
   1   7   1 479.154 23.9625   2
  -1   7  -1 462.579 18.9744   1
   2  -7   1 153.797 13.7738   3
  -2  -7  -1 141.327 11.9742   2
   2  -7   1 147.415 7.26016   1
  -2  -7  -1 153.812 7.37221   3
  -2  -7  -1 136.451 11.6953   1
   2  -7   1 162.084 13.0190   2
   2   7   1 155.873 12.0479   1
  -2   7  -1 148.697 7.50562   1
  -2   7  -1 151.986 12.8040   2
   2   7   1 137.040 11.7756   2
   3  -7   1 37.9797 9.11929   3
   3  -7   1 21.6896 6.12907   2
  -3  -7  -1 44.3287 8.97567   2
  -3  -7  -1 33.2782 7.37770   1
   3   7   1 26.4686 7.00654   1
   3   7   1 32.1510 6.59458   2
  -3   7  -1 40.4805 8.14416   2
  -4  -7  -1 855.675 40.1425   1
   4  -7   1 904.483 39.8052   2
   4  -7   1 878.728 43.8660   3
  -4  -7  -1 805.285 37.5977   2
  -4   7  -1 928.493 40.6553   2
   4   7   1 864.500 37.9310   2
   4   7   1 909.349 40.6433   1
  -5  -7  -1 47.9223 10.4526   1
   5  -7   1 25.2597 8.23253   3
   5  -7   1 40.9911 8.94894   2
  -5  -7  -1 16.7371 5.82293   2
   5   7   1 16.7729 6.52820   1
   5   7   1 34.9500 7.95974   2
   6  -7   1 750.678 43.4779   3
  -6  -7  -1 773.112 36.2639   2
  -6  -7  -1 704.738 38.7349   1
   6  -7   1 697.822 36.2636   2
  -6   7  -1 715.265 37.1855   2
   6   7   1 793.933 35.9689   2
   6   7   1 761.213 39.7658   1
  -7  -7  -1 884.948 45.5302   1
   7  -7   1 828.964 30.2642   1
   7  -7   1 875.905 42.1212   2
  -7  -7  -1 916.320 41.3260   2
   7  -7   1 855.629 30.3446   1
   7  -7   1 779.786 47.8283   3
   7   7   1 883.435 40.1952   2
   7   7   1 855.217 45.1404   1
  -7   7  -1 823.484 42.0105   2
   8  -7   1 270.943 13.7286   1
   8  -7   1 268.385 13.7819   1
  -8  -7  -1 317.777 21.8039   2
   8  -7   1 238.682 20.2180   2
   8   7   1 259.543 13.0669   3
   8   7   1 262.812 19.7689   2
   8   7   1 251.485 23.2347   1
   9  -7   1 17.8504 4.57563   1
   9  -7   1 15.1490 4.02017   1
   9  -7   1 11.4599 7.36616   3
   9  -7   1 6.09516 5.01750   2
  -9  -7  -1 20.2471 9.13959   1
  -9  -7  -1 11.8383 5.84312   2
   9   7   1 4.49119 2.52742   3
   9   7   1 14.5295 5.97742   2
   9   7   1 3.89445 4.33964   1
  10  -7   1 6.56455 3.06377   1
  10  -7   1 1.37399 3.88746   2
 -10  -7  -1 12.3985 8.06828   1
  10  -7   1 6.83796 4.78699   2
 -10  -7  -1 8.96128 5.18767   2
  10  -7   1 10.9488 4.01196   1
  10  -7   1 10.2763 7.21357   3
  10   7   1 17.8680 6.52642   2
  10   7   1 9.83031 3.76696   3
  11  -7   1 10.7761 5.65799   2
  11  -7   1 9.74842 5.62752   2
  11  -7   1 25.0871 5.87214   1
  11  -7   1 13.0499 9.47573   3
  11  -7   1 31.4711 6.60575   1
  11   7   1 16.1657 4.82691   3
  11   7   1 11.5434 5.33795   2
  12  -7   1 0.05223 2.29113   2
  12  -7   1 0.35060 1.64598   1
  12  -7   1 3.80287 3.64260   2
  12  -7   1 0.96379 2.52017   1
  12  -7   1 0.13744 2.78043   3
  13  -7   1 27.4533 9.79409   2
  13   7   1 21.2813 8.20162   2
  13  -8  -1 9.38553 6.21117   2
  13   8  -1 5.92357 5.32123   2
  12  -8  -1 38.5563 12.3967   2
  12  -8  -1 29.8782 13.1222   3
  12   8  -1 22.3823 7.96330   2
 -11  -8   1 68.7182 16.9014   1
  11  -8  -1 44.3882 10.8623   2
  11  -8  -1 62.5462 18.0458   3
  11  -8  -1 42.7583 10.4126   2
  11   8  -1 63.4021 13.0606   2
 -10  -8   1 6.53998 4.51013   2
  10  -8  -1 3.00607 4.34098   2
  10  -8  -1 1.61565 4.80103   3
 -10  -8   1 0.46078 6.22413   1
  10   8  -1 0.49590 2.04666   2
  -9  -8   1 2.07250 3.14133   2
   9  -8  -1 4.08625 5.56917   3
  -9  -8   1 -0.2167 4.64720   1
   9  -8  -1 4.90434 4.33914   2
   9   8  -1 -1.3961 1.49934   2
   8  -8  -1 773.244 39.9739   2
  -8  -8   1 836.412 46.3755   1
   8  -8  -1 835.781 51.1367   3
  -8  -8   1 816.665 39.7247   2
   8   8  -1 813.975 39.1245   2
  -8   8   1 793.280 41.5867   2
  -7  -8   1 426.209 25.8503   2
   7  -8  -1 448.857 34.1727   3
  -7  -8   1 468.931 31.2936   1
   7  -8  -1 472.995 27.7234   2
  -7   8   1 446.562 28.1553   2
   7   8  -1 439.421 25.7473   2
   7   8  -1 301.206 29.5730   1
   6  -8  -1 278.404 20.0562   2
   6  -8  -1 320.087 26.5042   3
  -6  -8   1 268.591 19.1118   2
  -6  -8   1 259.840 21.9207   1
  -6   8   1 256.412 20.0227   2
   6   8  -1 250.768 18.4051   2
   6   8  -1 260.162 21.4559   1
   5  -8  -1 4.70148 4.13001   3
  -5  -8   1 -3.5783 2.02363   1
  -5  -8   1 1.12808 2.47429   2
   5  -8  -1 2.30897 3.18308   2
  -5   8   1 -1.6039 1.19442   2
   5   8  -1 -2.9350 1.92864   1
  -4  -8   1 82.8469 13.6698   1
   4  -8  -1 109.379 17.5682   3
  -4  -8   1 83.5505 9.73243   2
   4  -8  -1 64.8624 10.8174   2
   4   8  -1 81.0482 9.40175   2
  -4   8   1 77.9231 13.8060   3
   4   8  -1 71.2111 11.8869   1
  -4   8   1 93.8322 13.8336   2
  -3  -8   1 35.0301 7.65995   2
   3  -8  -1 54.2289 11.8497   3
  -3  -8   1 33.6981 8.22486   1
   3  -8  -1 39.4202 8.73837   2
   3   8  -1 46.7737 8.95670   1
  -3   8   1 37.2677 9.63367   3
   3   8  -1 36.7715 7.44874   2
  -3   8   1 36.9519 7.84313   2
  -2  -8   1 485.464 18.9568   3
   2  -8  -1 512.512 26.5548   2
   2  -8  -1 507.855 27.6031   3
  -2  -8   1 474.805 25.0270   1
  -2  -8   1 437.422 24.6349   2
  -2   8   1 495.225 18.0187   1
  -2   8   1 499.354 26.3798   2
   2   8  -1 483.608 24.8235   1
  -2   8   1 534.428 28.0503   3
   2   8  -1 493.182 25.7341   2
  -1  -8   1 85.8461 8.52508   1
  -1  -8   1 76.5995 9.05291   2
   1  -8  -1 81.2435 6.57348   1
  -1  -8   1 85.1767 7.36310   3
   1  -8  -1 76.2879 8.87817   3
   1  -8  -1 76.2950 9.17043   2
  -1   8   1 54.6446 8.58921   2
  -1   8   1 65.6578 8.31978   3
   1   8  -1 82.4938 8.23939   1
  -1   8   1 73.5605 6.11579   1
   1   8  -1 88.8875 12.7075   2
   0  -8  -1 172.736 12.2754   3
   0  -8   1 199.068 14.8998   2
   0  -8  -1 215.043 15.0935   2
   0  -8  -1 168.590 11.4222   1
   0  -8   1 183.963 11.8001   1
   0  -8   1 191.109 13.1394   3
   0   8   1 162.496 13.5425   2
   0   8  -1 166.273 11.2327   1
   0   8   1 158.435 12.1032   3
   0   8  -1 199.059 14.7472   2
   0   8   1 164.739 11.0967   1
   1  -8   1 86.4504 12.5449   3
  -1  -8  -1 78.2557 12.0093   2
  -1  -8  -1 59.8207 7.30600   1
  -1  -8  -1 53.3819 5.75882   3
   1  -8   1 44.2346 7.94455   2
   1  -8   1 55.7157 5.52529   1
  -1   8  -1 74.5360 6.18266   1
  -1   8  -1 59.4777 10.5677   2
   1   8   1 61.4816 7.16089   1
   1   8   1 71.2406 11.0313   2
  -2  -8  -1 28.4354 6.72773   2
   2  -8   1 46.6528 10.0093   3
   2  -8   1 28.2769 4.03852   1
  -2  -8  -1 27.6882 7.04606   1
  -2  -8  -1 27.2832 3.91570   3
   2  -8   1 34.2101 8.20904   2
   2   8   1 22.8998 6.11049   1
  -2   8  -1 33.7836 4.50951   1
  -2   8  -1 29.3407 7.37881   2
   2   8   1 30.8768 7.55950   2
  -3  -8  -1 142.517 12.9760   2
   3  -8   1 132.265 14.3872   3
  -3  -8  -1 181.543 14.6890   1
   3  -8   1 150.059 13.7454   2
   3   8   1 175.552 14.9760   1
  -3   8  -1 173.356 14.9492   2
   3   8   1 141.188 12.8628   2
   4  -8   1 21.7425 6.77818   2
  -4  -8  -1 18.9873 6.99300   1
  -4  -8  -1 15.4147 5.14003   2
   4  -8   1 10.9000 5.62192   3
   4   8   1 15.9438 6.01810   2
   4   8   1 24.0182 7.20339   1
  -4   8  -1 10.0422 4.52108   2
  -5  -8  -1 3.93374 4.21205   1
   5  -8   1 -2.3260 1.26436   2
   5  -8   1 3.49149 4.44613   3
  -5  -8  -1 0.48140 2.62165   2
   5   8   1 2.54042 3.58071   1
  -5   8  -1 2.02774 2.82133   2
   5   8   1 12.3661 5.06427   2
  -6  -8  -1 315.937 24.5574   1
  -6  -8  -1 354.946 22.9950   2
   6  -8   1 323.198 27.4418   3
   6  -8   1 310.834 22.6554   2
   6   8   1 377.452 23.0990   2
  -6   8  -1 344.520 24.1494   2
   6   8   1 337.749 25.0461   1
   7  -8   1 391.895 32.2017   3
  -7  -8  -1 442.499 30.3272   1
  -7  -8  -1 347.072 24.3731   2
   7  -8   1 376.954 25.9976   2
   7   8   1 423.071 25.7363   2
  -7   8  -1 413.458 27.5481   2
  -8  -8  -1 222.598 19.2494   2
   8  -8   1 260.895 26.8403   3
   8  -8   1 243.564 20.6097   2
  -8  -8  -1 252.318 23.6900   1
  -8   8  -1 228.015 20.5926   2
   8   8   1 245.648 19.4628   2
  -9  -8  -1 37.6890 9.90793   2
   9  -8   1 16.3128 8.29039   3
   9  -8   1 51.2472 12.0088   2
  -9  -8  -1 23.4504 10.1314   1
   9   8   1 19.0082 6.93408   2
 -10  -8  -1 59.4783 16.5844   1
 -10  -8  -1 46.7864 11.2963   2
  10  -8   1 55.7182 13.3064   2
  10  -8   1 48.2416 13.8702   3
  10   8   1 48.9854 11.0200   2
  11  -8   1 32.4325 10.2981   2
  11  -8   1 30.6185 9.46320   2
  11  -8   1 23.4969 11.1470   3
  11  -8   1 21.5311 4.36421   1
  11   8   1 21.5054 8.12080   2
  12  -8   1 1.67592 3.40157   2
  12  -8   1 -0.4780 2.79945   2
  12  -8   1 -1.5470 2.58956   3
  12   8   1 0.94470 2.93325   2
  12  -9  -1 0.50325 2.90216   2
  12  -9  -1 0.36150 3.24843   3
  12  -9  -1 2.93160 3.81412   2
  11  -9  -1 19.7040 17.6597   3
  11  -9  -1 29.7664 10.2648   2
 -11  -9   1 20.2412 7.44081   2
  11   9  -1 21.6107 7.75466   2
  10  -9  -1 60.0441 12.7559   2
  10  -9  -1 72.5895 19.9576   3
 -10  -9   1 57.4296 14.8540   1
 -10  -9   1 63.0327 13.0261   2
  10   9  -1 47.7988 10.6956   2
  -9  -9   1 190.618 22.2593   1
   9  -9  -1 232.220 19.9705   2
  -9  -9   1 185.195 17.4399   2
   9  -9  -1 197.391 31.3972   3
   9   9  -1 168.598 16.5100   2
  -9   9   1 186.500 18.7959   2
  -8  -9   1 254.510 20.4056   2
  -8  -9   1 243.483 24.0021   1
   8  -9  -1 231.931 20.2132   2
   8  -9  -1 240.116 26.1677   3
  -8   9   1 239.759 21.4242   2
   8   9  -1 297.515 21.4251   2
  -7  -9   1 1483.34 61.2222   2
  -7  -9   1 1482.83 68.6310   1
   7  -9  -1 1534.59 62.9220   2
  -7   9   1 1455.55 63.5626   2
   7   9  -1 1428.31 60.2789   2
   6  -9  -1 172.565 16.4292   2
  -6  -9   1 178.391 16.0268   2
   6  -9  -1 225.914 22.5522   3
  -6  -9   1 185.383 18.9364   1
   6   9  -1 199.878 16.4943   2
  -6   9   1 174.596 16.9098   2
   6   9  -1 166.691 17.5631   1
   5  -9  -1 65.6351 15.1517   3
  -5  -9   1 64.6498 11.6896   2
   5  -9  -1 69.3385 12.5125   2
  -5  -9   1 65.5531 13.0582   1
   5   9  -1 69.5366 14.0249   1
  -5   9   1 56.9788 11.9283   2
   5   9  -1 58.0578 10.1441   2
  -4  -9   1 75.0770 12.7129   1
   4  -9  -1 90.7637 17.3321   3
  -4  -9   1 85.6194 13.5886   2
   4  -9  -1 86.0600 12.8740   2
   4   9  -1 94.9278 13.7288   2
  -4   9   1 86.6609 13.8964   2
   4   9  -1 86.5486 14.2949   1
  -4   9   1 84.1781 14.7957   3
   3  -9  -1 -0.1240 1.40568   2
   3  -9  -1 2.33107 3.13085   3
  -3  -9   1 0.29132 2.29167   2
  -3  -9   1 6.76242 4.18097   1
  -3   9   1 0.31856 2.11587   3
   3   9  -1 0.70829 2.16579   2
  -3   9   1 -0.7822 1.46414   2
   3   9  -1 3.83467 3.02915   1
  -2  -9   1 225.855 11.4640   3
  -2  -9   1 223.596 16.1473   1
  -2  -9   1 219.924 16.6116   2
   2  -9  -1 195.342 16.2295   2
   2  -9  -1 221.678 17.7037   3
  -2   9   1 222.576 10.4725   1
   2   9  -1 241.280 16.4151   1
  -2   9   1 204.313 16.5936   2
  -2   9   1 219.791 17.4928   3
  -1  -9   1 27.9829 6.44419   1
   1  -9  -1 52.5017 10.1937   3
  -1  -9   1 25.6420 6.60797   2
  -1  -9   1 41.3572 7.07235   3
   1  -9  -1 22.2904 4.72259   1
   1  -9  -1 17.6258 5.83912   2
   1   9  -1 37.3561 7.19950   1
  -1   9   1 38.2966 8.19230   3
  -1   9   1 31.6763 5.34562   1
   0  -9  -1 106.733 10.0994   3
   0  -9   1 124.936 11.0025   3
   0  -9   1 125.683 12.4898   2
   0  -9   1 123.201 9.97866   1
   0  -9  -1 116.772 11.8945   2
   0  -9  -1 134.592 10.3206   1
   0   9  -1 131.666 10.0401   1
   0   9   1 138.825 10.1972   1
  -1  -9  -1 5.82001 3.76247   1
   1  -9   1 7.67848 4.18221   2
  -1  -9  -1 9.16232 3.38528   3
  -1  -9  -1 8.79381 4.50170   2
   1  -9   1 2.29696 1.95952   1
   1  -9   1 2.55919 3.22657   3
   1   9   1 11.3424 5.76103   2
  -1   9  -1 6.10494 2.71169   1
  -1   9  -1 2.12203 2.78489   2
   1   9   1 5.79776 3.77600   1
   2  -9   1 259.305 19.2030   3
   2  -9   1 232.289 11.4271   1
   2  -9   1 216.050 17.3406   2
  -2  -9  -1 226.375 17.2549   2
  -2  -9  -1 240.796 16.8826   1
  -2  -9  -1 243.454 11.8648   3
   2   9   1 215.132 15.9238   1
  -2   9  -1 237.845 18.0209   2
  -2   9  -1 227.254 11.3464   1
   2   9   1 258.228 18.0999   2
  -3  -9  -1 2.62767 2.92206   2
   3  -9   1 6.48793 3.79970   2
   3  -9   1 2.34280 3.45135   3
  -3  -9  -1 1.11896 2.62513   1
   3   9   1 0.24195 2.32318   2
   3   9   1 6.13702 3.86476   1
  -3   9  -1 4.82548 3.51328   2
  -4  -9  -1 1.68385 3.44062   1
  -4  -9  -1 0.88138 2.34349   2
   4  -9   1 -1.5801 1.55312   3
   4  -9   1 2.90495 3.36797   2
   4   9   1 -2.2199 1.69391   1
  -4   9  -1 3.10288 3.37568   2
   4   9   1 -0.0682 1.66295   2
   5  -9   1 121.614 13.6379   2
  -5  -9  -1 111.138 17.6157   1
   5  -9   1 100.820 17.1992   3
  -5  -9  -1 134.084 13.7152   2
   5   9   1 144.081 15.3955   1
   5   9   1 125.163 13.0749   2
  -5   9  -1 135.429 14.5613   2
   6  -9   1 67.5313 12.5750   2
   6  -9   1 83.5027 17.7610   3
  -6  -9  -1 72.9671 15.0429   1
  -6  -9  -1 72.4368 13.1533   2
  -6   9  -1 68.4529 13.9194   2
   6   9   1 94.2413 17.0397   1
   6   9   1 51.5602 10.8398   2
   7  -9   1 693.998 38.3123   2
  -7  -9  -1 696.999 37.3885   2
  -7   9  -1 752.525 40.4038   2
   7   9   1 680.519 36.4016   2
   8  -9   1 216.646 24.7045   3
  -8  -9  -1 175.694 17.2399   2
  -8  -9  -1 145.367 21.5521   1
   8  -9   1 164.709 17.4650   2
  -8   9  -1 158.457 17.7445   2
   8   9   1 142.263 15.4493   2
   9  -9   1 33.1229 9.70034   2
  -9  -9  -1 54.1063 12.2314   2
  -9  -9  -1 40.2168 12.2253   1
   9  -9   1 56.9589 17.4723   3
   9   9   1 42.8297 10.3839   2
  10  -9   1 24.2712 10.7763   3
 -10  -9  -1 11.9675 5.92026   2
 -10  -9  -1 13.3585 8.92340   1
  10   9   1 13.6744 6.19065   2
 -11  -9  -1 6.98900 5.57895   2
  11  -9   1 -2.9950 2.52696   3
  11  -9   1 3.21615 3.88378   2
  11  -9   1 2.85499 3.92657   2
  11   9   1 5.26331 5.03009   2
  12  -9   1 2.54404 3.66839   2
  12   9   1 4.17781 4.49412   2
  12 -10  -1 12.3399 6.48188   2
  11 -10  -1 35.6815 16.1239   3
 -11 -10   1 68.9779 16.0548   2
  11 -10  -1 53.0364 12.9967   2
 -11 -10   1 65.6605 17.0418   1
  11  10  -1 80.7597 16.7256   2
 -10 -10   1 7.17780 7.04254   1
 -10 -10   1 -1.1823 1.45457   2
  10 -10  -1 1.63105 3.64553   3
  10  10  -1 2.30201 3.64082   2
   9 -10  -1 134.535 23.5545   3
  -9 -10   1 129.492 15.3644   2
   9 -10  -1 137.147 16.0764   2
  -9 -10   1 150.023 23.0386   1
   9  10  -1 124.585 14.5819   2
  -9  10   1 149.587 17.4297   2
   8 -10  -1 1033.45 60.0636   3
   8 -10  -1 927.161 47.8399   2
  -8 -10   1 1043.50 48.6190   2
  -8 -10   1 956.117 53.3458   1
  -8  10   1 929.257 49.3598   2
   8  10  -1 1002.87 47.3478   2
  -7 -10   1 198.706 18.2655   2
   7 -10  -1 222.971 19.7928   2
   7 -10  -1 237.420 25.1140   3
  -7 -10   1 208.029 21.3815   1
   7  10  -1 181.888 17.2054   2
  -7  10   1 207.609 19.7329   2
   6 -10  -1 42.4927 10.4953   2
  -6 -10   1 25.3161 9.16811   1
   6 -10  -1 50.8206 14.5533   3
  -6 -10   1 13.2807 5.92447   2
   6  10  -1 48.3632 10.6684   2
   6  10  -1 30.7752 8.62590   1
  -6  10   1 38.5356 9.71697   2
   5 -10  -1 40.5216 11.1016   3
  -5 -10   1 81.9173 16.0554   1
   5 -10  -1 76.3196 13.6729   2
  -5 -10   1 60.3654 11.6549   2
   5  10  -1 52.7617 12.4167   1
  -5  10   1 77.8328 13.7242   2
   5  10  -1 53.6649 10.4060   2
  -4 -10   1 22.3470 7.33387   1
   4 -10  -1 21.3262 7.99661   3
   4 -10  -1 18.1542 7.13934   2
  -4 -10   1 24.1262 7.44223   2
   4  10  -1 26.2513 8.19340   1
  -4  10   1 25.2816 7.90632   2
   4  10  -1 16.7165 6.30107   2
   3 -10  -1 126.717 13.4647   2
  -3 -10   1 140.492 14.0361   1
  -3 -10   1 130.603 13.4348   2
   3 -10  -1 135.265 15.0858   3
   3  10  -1 127.840 13.0914   1
   3  10  -1 127.403 13.2702   2
  -3  10   1 136.069 14.0317   2
  -2 -10   1 73.2282 6.48348   3
  -2 -10   1 94.2265 13.7310   1
   2 -10  -1 67.1416 11.5070   3
   2 -10  -1 66.8934 11.2026   2
  -2 -10   1 62.3679 11.7796   2
  -2  10   1 100.327 15.3477   2
   2  10  -1 72.1023 13.4656   1
   2  10  -1 84.3338 13.3745   2
  -2  10   1 76.3097 5.89460   1
   1 -10  -1 559.997 29.4390   3
  -1 -10   1 543.141 30.0430   2
   1 -10  -1 544.785 24.0476   1
  -1 -10   1 539.193 27.2715   1
   1 -10  -1 536.801 30.1290   2
  -1 -10   1 540.108 25.3915   3
  -1  10   1 589.955 30.9831   2
   1  10  -1 552.510 30.1025   2
   1  10  -1 533.141 26.7731   1
  -1  10   1 541.307 23.4639   1
   0 -10  -1 190.648 16.2521   2
   0 -10   1 189.554 14.6434   3
   0 -10  -1 197.673 14.6567   3
   0 -10   1 210.950 17.3241   2
   0 -10  -1 194.642 13.5870   1
   0 -10   1 204.147 13.7928   1
   0  10   1 221.160 17.2435   2
   0  10  -1 215.484 13.8256   1
   0  10   1 205.617 13.5312   1
   0  10  -1 190.520 16.3507   2
   1 -10   1 0.96443 2.17370   2
  -1 -10  -1 0.40829 2.29872   2
  -1 -10  -1 9.05961 3.75718   3
   1 -10   1 3.29494 2.41609   1
   1 -10   1 3.37244 2.96541   3
  -1 -10  -1 5.01402 3.44308   1
   1  10   1 6.55006 3.88862   2
   1  10   1 7.42583 3.79784   1
  -1  10  -1 14.8504 6.21226   2
  -1  10  -1 6.55474 2.80512   1
  -2 -10  -1 22.4756 6.94237   1
  -2 -10  -1 20.5317 4.26237   3
  -2 -10  -1 22.0602 7.34983   2
   2 -10   1 26.1947 4.51134   1
   2 -10   1 20.5338 7.17364   3
   2 -10   1 12.3687 5.50902   2
   2  10   1 15.8210 5.84462   2
  -2  10  -1 24.2900 7.08761   2
  -2  10  -1 26.5307 4.58910   1
  -3 -10  -1 669.505 35.0802   2
   3 -10   1 690.381 38.0010   3
   3 -10   1 624.933 34.8470   2
  -3 -10  -1 696.940 35.1160   1
   3  10   1 641.992 33.7750   1
   3  10   1 685.490 34.9729   2
  -3  10  -1 694.941 36.4362   2
  -4 -10  -1 489.114 28.7078   2
   4 -10   1 483.740 29.3700   2
   4 -10   1 462.469 31.7102   3
  -4 -10  -1 442.452 28.3611   1
  -4  10  -1 455.376 29.0660   2
   4  10   1 431.929 27.6891   1
   4  10   1 468.509 28.0122   2
   5 -10   1 15.7414 6.62239   2
  -5 -10  -1 20.7411 7.54587   2
  -5 -10  -1 13.0451 6.64184   1
   5 -10   1 11.6261 5.97378   3
  -5  10  -1 7.92639 5.14207   2
   5  10   1 11.9478 6.59627   1
   5  10   1 17.5293 6.96214   2
   6 -10   1 41.6147 12.3271   3
  -6 -10  -1 57.8417 13.2569   1
  -6 -10  -1 41.0899 9.84003   2
   6 -10   1 55.1186 12.2438   2
   6  10   1 58.9055 12.2081   2
   6  10   1 38.3080 11.2924   1
  -6  10  -1 83.0893 15.4161   2
   7 -10   1 91.4724 18.9969   3
  -7 -10  -1 85.8948 14.1340   2
   7 -10   1 103.011 16.5941   2
  -7 -10  -1 39.2723 10.6007   1
  -7  10  -1 81.7471 15.5427   2
   7  10   1 65.6665 12.3264   2
  -8 -10  -1 125.506 21.6524   1
  -8 -10  -1 111.035 17.4777   2
   8 -10   1 142.908 16.7132   2
   8 -10   1 141.112 23.5601   3
  -8  10  -1 151.882 17.7222   2
   8  10   1 98.5664 16.2071   2
  -9 -10  -1 104.766 21.4963   1
   9 -10   1 76.8959 18.3023   3
  -9 -10  -1 79.3232 14.3326   2
   9  10   1 67.5970 12.8854   2
  -9  10  -1 63.6706 16.0547   2
 -10 -10  -1 17.3002 7.20393   2
 -10 -10  -1 28.5345 10.7617   1
  10 -10   1 62.3070 20.0461   3
  10 -10   1 20.5740 8.43520   2
  10  10   1 26.6890 8.53233   2
 -11 -10  -1 22.3031 8.76390   2
  11 -10   1 18.1379 8.26291   2
  11 -10   1 8.81409 6.71924   3
  11  10   1 20.0893 8.34159   2
  12 -10   1 12.6137 6.47684   2
 -12 -11   1 12.9225 7.53032   2
  12 -11  -1 36.9082 11.8285   2
 -11 -11   1 3.07876 4.41898   1
  11 -11  -1 1.07162 5.11300   3
 -11 -11   1 0.62397 2.64576   2
  11 -11  -1 3.26850 4.11456   2
  11  11  -1 2.85495 3.87972   2
  10 -11  -1 2.00338 3.02249   2
 -10 -11   1 3.38640 7.59842   1
  10  11  -1 -1.8064 1.90737   2
  -9 -11   1 85.0740 15.5146   2
   9 -11  -1 97.4018 20.3883   2
  -9 -11   1 75.6026 17.3898   1
   9 -11  -1 88.9305 22.0628   3
   9  11  -1 114.775 17.7208   2
  -8 -11   1 468.453 35.3630   1
   8 -11  -1 477.942 39.3526   3
  -8 -11   1 430.020 29.9241   2
   8 -11  -1 529.132 33.1933   2
  -8  11   1 526.082 34.4084   2
   8  11  -1 417.364 29.0873   2
  -7 -11   1 248.521 21.0454   2
  -7 -11   1 235.599 23.3245   1
   7 -11  -1 248.592 21.6668   2
   7 -11  -1 253.758 26.7472   3
  -7  11   1 242.825 22.0020   2
   7  11  -1 213.126 19.3984   2
   7  11  -1 264.486 24.3906   1
   6 -11  -1 -1.8896 2.12784   2
  -6 -11   1 5.18621 4.61774   2
  -6 -11   1 9.10347 7.74445   1
   6 -11  -1 -2.8115 2.54249   3
   6  11  -1 10.5075 6.52847   1
  -6  11   1 7.90686 4.79748   2
   6  11  -1 3.73028 3.80141   2
   5 -11  -1 23.4116 9.70288   3
   5 -11  -1 9.35844 5.11846   2
  -5 -11   1 14.7442 6.86249   1
  -5 -11   1 11.3639 5.45413   2
  -5  11   1 12.7370 5.93496   2
   5  11  -1 19.9083 7.76258   1
   5  11  -1 15.1669 5.64048   2
  -4 -11   1 247.896 20.7328   1
  -4 -11   1 247.053 19.9203   2
   4 -11  -1 209.689 21.4153   3
   4 -11  -1 241.573 20.2305   2
   4  11  -1 227.416 19.0202   2
  -4  11   1 229.959 20.2113   2
   4  11  -1 243.761 20.0711   1
  -3 -11   1 439.182 28.0914   1
   3 -11  -1 505.985 30.4531   2
   3 -11  -1 556.625 33.3926   3
  -3 -11   1 491.063 29.5379   2
   3  11  -1 469.575 28.9232   2
  -3  11   1 478.753 29.9271   2
   3  11  -1 502.247 28.9106   1
  -2 -11   1 14.1701 4.04535   3
  -2 -11   1 18.1425 6.96230   1
   2 -11  -1 26.4380 8.37141   3
  -2 -11   1 13.1806 5.31397   2
   2 -11  -1 29.2628 9.02325   2
   2  11  -1 10.9790 5.15715   1
  -2  11   1 24.9166 7.57186   2
   2  11  -1 25.9707 8.28230   2
  -2  11   1 24.8719 4.61753   1
   1 -11  -1 235.482 18.2354   3
   1 -11  -1 233.754 19.2758   2
  -1 -11   1 238.813 19.3340   2
  -1 -11   1 250.854 16.0028   3
   1 -11  -1 258.611 15.0492   1
  -1 -11   1 240.479 17.2827   1
  -1  11   1 252.420 19.7388   2
   1  11  -1 212.428 16.1230   1
  -1  11   1 237.808 14.0299   1
   1  11  -1 244.272 19.4087   2
   0 -11   1 20.1253 7.18739   3
   0 -11   1 17.7598 6.40323   1
   0 -11  -1 15.0986 5.44296   2
   0 -11  -1 15.1775 5.78522   1
   0 -11  -1 21.7605 6.17071   3
   0 -11   1 14.8472 5.74777   2
   0  11   1 25.6234 6.39443   1
   0  11  -1 15.3414 6.18111   2
   0  11   1 18.1598 6.74651   2
   0  11  -1 25.1483 5.90278   1
  -1 -11  -1 19.1653 5.15749   3
   1 -11   1 25.5535 7.07593   3
  -1 -11  -1 24.1465 7.92256   2
   1 -11   1 30.7425 6.23465   1
   1 -11   1 38.7789 10.0661   2
  -1 -11  -1 22.5817 6.66251   1
  -1  11  -1 28.3026 5.75214   1
   1  11   1 28.3974 7.55596   1
   1  11   1 36.7252 9.48209   2
  -1  11  -1 29.7321 8.56809   2
  -2 -11  -1 509.508 30.3400   2
  -2 -11  -1 519.870 28.7887   1
   2 -11   1 479.947 21.4056   1
  -2 -11  -1 564.126 22.9252   3
   2 -11   1 516.062 31.1092   3
   2 -11   1 509.667 30.8594   2
  -2  11  -1 521.069 21.7010   1
   2  11   1 496.881 29.8865   2
   2  11   1 517.241 28.2522   1
  -2  11  -1 507.146 30.7559   2
   3 -11   1 85.0465 14.2784   2
   3 -11   1 111.623 18.9009   3
  -3 -11  -1 73.1874 13.0144   1
  -3 -11  -1 70.7395 12.8428   2
   3  11   1 75.2711 12.2958   1
  -3  11  -1 84.4243 15.6849   2
   3  11   1 72.8201 13.5857   2
   4 -11   1 1376.78 61.4233   2
  -4 -11  -1 1472.88 62.0586   1
  -4 -11  -1 1438.90 61.1967   2
   4 -11   1 1310.73 64.3127   3
   4  11   1 1414.39 60.8003   1
   4  11   1 1445.53 60.7304   2
  -4  11  -1 1355.78 61.6282   2
  -5 -11  -1 256.069 22.1669   1
   5 -11   1 231.059 20.8841   2
   5 -11   1 247.769 24.3674   3
  -5 -11  -1 265.550 21.3524   2
   5  11   1 223.880 20.7038   1
   5  11   1 237.232 20.0640   2
  -5  11  -1 269.433 22.4110   2
   6 -11   1 73.0424 13.8456   2
  -6 -11  -1 68.7396 13.0357   2
   6  11   1 31.2582 10.1344   1
  -6  11  -1 73.0510 14.4474   2
   6  11   1 51.1104 11.5777   2
  -7 -11  -1 153.085 17.0438   2
   7 -11   1 221.960 25.2197   3
   7 -11   1 152.378 17.4491   2
  -7 -11  -1 200.274 21.2991   1
   7  11   1 158.808 18.9665   1
  -7  11  -1 183.481 19.3518   2
   7  11   1 177.451 17.8447   2
  -8 -11  -1 261.495 26.1417   1
  -8 -11  -1 234.981 21.8564   2
   8 -11   1 359.043 52.1278   2
   8 -11   1 310.611 31.3772   3
   8  11   1 246.206 22.1752   2
   9 -11   1 39.9532 11.1524   2
  -9 -11  -1 38.8041 12.9194   1
  -9 -11  -1 49.7872 12.1072   2
   9 -11   1 39.0822 13.9394   3
   9  11   1 52.2570 13.0311   2
  10 -11   1 19.1557 8.09623   2
 -10 -11  -1 24.5548 9.27952   2
  10 -11   1 14.1446 9.46289   3
  10  11   1 12.7126 6.57871   2
 -11 -11  -1 8.18769 5.56458   2
  11 -11   1 5.61495 5.29497   2
  11 -11   1 -1.8059 2.94700   3
  12 -11   1 17.6582 8.84736   2
 -11 -12   1 -0.6186 2.46544   2
  11 -12  -1 8.60065 5.70465   2
  10 -12  -1 1.02571 3.30590   2
 -10 -12   1 1.82548 4.61063   1
  10 -12  -1 -2.7903 2.61744   3
 -10 -12   1 1.90418 4.48414   2
  10  12  -1 2.77684 4.19417   2
  -9 -12   1 8.54794 7.12110   1
   9 -12  -1 4.77453 5.16723   2
  -9 -12   1 1.76830 2.96218   2
   9 -12  -1 0.83732 4.24297   3
   9  12  -1 7.00628 4.68093   2
  -9  12   1 -1.2443 3.55704   2
  -8 -12   1 60.7854 13.0818   2
   8 -12  -1 40.9776 13.4340   3
  -8 -12   1 55.1263 15.5182   1
   8 -12  -1 101.329 18.6512   2
  -7 -12   1 164.649 19.7597   1
  -7 -12   1 136.140 16.4199   2
   7 -12  -1 144.450 17.2537   2
   7 -12  -1 198.907 30.2103   3
  -7  12   1 133.831 24.3906   2
   7  12  -1 166.804 17.2850   2
  -6 -12   1 17.4775 7.70516   1
  -6 -12   1 30.6627 9.20621   2
   6 -12  -1 18.7236 8.39051   3
   6 -12  -1 21.2442 7.87015   2
  -6  12   1 33.2257 10.6942   2
   6  12  -1 8.73100 5.10541   2
  -5 -12   1 164.498 18.3569   1
  -5 -12   1 181.328 17.9813   2
   5 -12  -1 193.661 18.8714   2
   5 -12  -1 173.148 20.7583   3
  -5  12   1 228.788 20.6441   2
   5  12  -1 194.153 18.2685   2
   5  12  -1 194.410 19.1295   1
   4 -12  -1 134.494 15.9649   2
  -4 -12   1 115.733 17.1462   1
   4 -12  -1 155.219 23.4578   3
  -4 -12   1 142.309 15.8845   2
   4  12  -1 114.482 13.9935   1
  -4  12   1 136.826 16.2189   2
   4  12  -1 144.262 15.5533   2
  -3 -12   1 1540.58 65.3389   2
  -3 -12   1 1556.44 64.4697   1
   3 -12  -1 1478.78 67.2579   3
   3 -12  -1 1492.55 65.6735   2
   3  12  -1 1492.55 64.3831   2
  -3  12   1 1500.07 65.7718   2
   3  12  -1 1583.80 63.9517   1
  -2 -12   1 800.955 42.3240   2
  -2 -12   1 821.175 33.5363   3
   2 -12  -1 869.043 44.1164   2
  -2 -12   1 840.186 40.8000   1
   2 -12  -1 895.898 44.2468   3
   2  12  -1 918.143 41.2388   1
  -2  12   1 883.524 44.4033   2
   2  12  -1 823.646 42.6724   2
  -2  12   1 849.723 32.1343   1
   1 -12  -1 10.5016 5.48588   3
  -1 -12   1 3.08114 2.84866   3
  -1 -12   1 1.15953 3.00877   2
  -1 -12   1 1.06694 3.73876   1
   1 -12  -1 3.00595 3.57923   2
  -1  12   1 2.98084 3.23071   2
  -1  12   1 8.94576 3.68553   1
   1  12  -1 14.4940 6.92570   2
   0 -12  -1 164.042 16.4295   2
   0 -12   1 174.444 16.9650   2
   0 -12   1 160.643 14.4008   3
   0 -12  -1 124.641 11.8698   1
   0 -12  -1 158.939 14.0466   3
   0 -12   1 162.883 13.2317   1
   0  12   1 164.673 16.2704   2
   0  12  -1 164.003 12.8854   1
   0  12   1 151.141 12.3998   1
   0  12  -1 131.842 14.9055   2
   1 -12   1 108.314 17.2723   2
  -1 -12  -1 116.803 18.1065   2
  -1 -12  -1 128.572 11.2297   3
  -1 -12  -1 115.743 12.1106   1
   1 -12   1 105.916 12.7226   3
   1 -12   1 97.9757 9.39510   1
  -1  12  -1 110.543 13.5259   2
  -1  12  -1 120.585 10.0447   1
   1  12   1 125.704 14.1788   2
  -2 -12  -1 506.321 22.9426   3
   2 -12   1 521.659 32.1195   3
   2 -12   1 533.224 32.5537   2
   2 -12   1 505.615 22.3137   1
  -2 -12  -1 491.840 31.0077   2
  -2 -12  -1 500.616 29.1607   1
   2  12   1 501.311 28.5677   1
  -2  12  -1 506.705 22.0978   1
   2  12   1 539.642 32.0152   2
  -2  12  -1 475.411 31.1088   2
  -3 -12  -1 2683.44 103.098   2
  -3 -12  -1 2793.81 102.062   1
   3 -12   1 2852.58 107.351   3
   3 -12   1 2773.26 104.643   2
   3  12   1 2748.47 103.081   2
  -3  12  -1 2696.52 104.408   2
   3  12   1 2781.69 101.221   1
  -4 -12  -1 32.3463 9.96221   2
   4 -12   1 40.4517 11.5711   2
  -4 -12  -1 38.4638 10.6360   1
   4 -12   1 19.1933 8.80550   3
   4  12   1 39.0082 10.7969   1
   4  12   1 36.7986 10.2242   2
  -4  12  -1 26.8159 9.19400   2
   5 -12   1 404.383 28.4542   2
   5 -12   1 321.068 29.1177   3
  -5 -12  -1 370.459 26.6417   2
  -5 -12  -1 337.475 26.7769   1
   5  12   1 370.022 27.3730   1
  -5  12  -1 377.191 28.0562   2
   5  12   1 335.911 25.4478   2
   6 -12   1 106.546 22.8467   3
  -6 -12  -1 68.5342 14.2460   1
  -6 -12  -1 64.3256 13.5014   2
   6 -12   1 65.5253 13.8124   2
  -6  12  -1 67.7983 14.4381   2
   6  12   1 52.6086 11.4352   2
   7 -12   1 13.4000 8.05192   3
  -7 -12  -1 11.6728 6.92761   1
   7 -12   1 20.4795 8.86708   2
  -7 -12  -1 9.58563 5.52393   2
  -7  12  -1 2.55810 3.48144   2
  -8 -12  -1 52.4850 12.6866   2
   8 -12   1 62.7115 18.0253   3
  -8 -12  -1 43.6320 13.5527   1
   8 -12   1 61.7112 14.3939   2
   8  12   1 37.1782 10.1959   2
   9 -12   1 17.4451 8.86709   2
   9 -12   1 2.87675 4.61640   3
  -9 -12  -1 15.4584 9.53592   1
  -9 -12  -1 0.13470 3.23075   2
   9  12   1 7.65995 5.66230   2
  10 -12   1 52.2473 18.3979   3
 -10 -12  -1 36.8910 10.9419   2
  10 -12   1 56.3938 14.5058   2
 -11 -12  -1 15.8079 7.80345   2
  11 -12   1 28.6702 11.3541   2
 -11 -13   1 22.1205 8.07008   2
  11 -13  -1 33.1629 11.2124   2
 -10 -13   1 3.22757 6.35657   1
 -10 -13   1 0.48572 2.42785   2
  10 -13  -1 -0.3901 2.94093   2
  10 -13  -1 3.49876 6.38300   3
  -9 -13   1 -1.7061 1.98219   2
   9 -13  -1 3.74067 4.66449   2
   9  13  -1 -1.3385 2.26887   2
  -8 -13   1 131.216 23.5775   1
  -8 -13   1 115.594 19.0906   2
   8 -13  -1 128.742 20.6643   2
   8 -13  -1 124.675 25.1332   3
   8  13  -1 130.792 20.3085   2
  -8  13   1 119.220 19.9276   2
   7 -13  -1 98.3766 21.1803   3
   7 -13  -1 75.6438 15.8332   2
  -7 -13   1 78.9128 17.0963   1
  -7 -13   1 107.939 19.7427   2
   7  13  -1 106.086 17.6714   2
  -6 -13   1 12.8520 6.81576   2
   6 -13  -1 6.12138 7.54440   3
   6 -13  -1 6.13488 5.89994   2
  -6 -13   1 16.5261 8.21909   1
   6  13  -1 11.7587 7.22743   1
  -6  13   1 1.21927 2.36806   2
  -5 -13   1 1.36037 4.80608   1
  -5 -13   1 -0.4018 2.95579   2
   5 -13  -1 -1.7279 2.10651   2
   5 -13  -1 -2.5589 3.04627   3
   5  13  -1 -0.3386 1.23274   1
  -5  13   1 1.56471 2.45844   2
   5  13  -1 0.93772 2.34323   2
   4 -13  -1 553.804 35.2787   2
   4 -13  -1 527.348 37.0339   3
  -4 -13   1 529.362 34.0355   2
  -4 -13   1 589.864 35.4794   1
  -4  13   1 553.209 35.6309   2
   4  13  -1 572.261 34.3800   1
   4  13  -1 591.024 35.0387   2
   3 -13  -1 747.389 42.7650   3
  -3 -13   1 695.460 40.0357   2
  -3 -13   1 769.596 40.2314   1
   3 -13  -1 790.860 42.7267   2
  -3  13   1 689.044 40.7115   2
   3  13  -1 770.053 41.1832   2
   3  13  -1 694.027 38.0418   1
   2 -13  -1 116.345 18.8456   3
   2 -13  -1 109.619 17.3178   2
  -2 -13   1 98.2087 15.5426   2
  -2 -13   1 123.572 13.8823   1
  -2 -13   1 104.783 9.41506   3
  -2  13   1 118.209 8.94536   1
  -2  13   1 116.278 17.4370   2
   2  13  -1 124.289 13.4522   1
   2  13  -1 99.1323 17.1504   2
   1 -13  -1 78.7647 15.2812   2
   1 -13  -1 88.5353 15.2758   3
  -1 -13   1 68.5415 8.70949   3
  -1 -13   1 71.3480 14.8838   2
  -1 -13   1 72.3538 12.5781   1
  -1  13   1 86.6160 16.2129   2
   1  13  -1 65.7771 11.3368   1
  -1  13   1 65.6757 7.58684   1
   1  13  -1 100.116 17.3408   2
   0 -13   1 4.61140 4.18813   3
   0 -13   1 13.4453 7.03869   2
   0 -13  -1 10.4929 4.48735   1
   0 -13  -1 21.1657 7.19077   3
   0 -13  -1 14.1550 7.07200   2
   0 -13   1 17.8128 6.02102   1
   0  13  -1 18.9952 6.17756   1
   0  13   1 5.69938 4.23686   2
   0  13   1 14.1543 5.45915   1
   0  13  -1 11.4090 5.31298   2
  -1 -13  -1 7.15097 5.07542   2
  -1 -13  -1 9.87056 5.34245   1
   1 -13   1 6.80656 3.53316   1
   1 -13   1 6.44591 4.72901   3
   1 -13   1 -1.6938 2.01181   2
  -1 -13  -1 8.44262 4.15325   3
  -1  13  -1 13.6193 6.70719   2
   1  13   1 0.23792 3.07171   1
  -1  13  -1 3.13878 2.64761   1
   1  13   1 7.07732 4.64929   2
   2 -13   1 138.563 16.4883   3
  -2 -13  -1 181.861 12.2660   3
  -2 -13  -1 183.373 16.9637   1
   2 -13   1 156.740 11.2853   1
   2 -13   1 143.744 17.0502   2
  -2 -13  -1 170.153 17.9746   2
  -2  13  -1 167.905 11.2344   1
   2  13   1 168.331 17.5543   2
   2  13   1 172.928 15.9128   1
  -2  13  -1 160.855 17.6055   2
  -3 -13  -1 543.742 33.0679   1
   3 -13   1 544.336 35.1242   2
  -3 -13  -1 630.608 36.6245   2
   3 -13   1 508.275 35.1350   3
   3  13   1 573.664 35.0285   2
   3  13   1 560.688 32.6681   1
  -3  13  -1 530.778 34.8903   2
  -4 -13  -1 981.086 50.3703   2
   4 -13   1 1095.61 53.1695   2
  -4 -13  -1 963.016 49.7754   1
   4 -13   1 1008.90 54.8230   3
   4  13   1 995.576 49.4573   1
  -4  13  -1 1005.93 51.9853   2
   4  13   1 967.921 49.7744   2
  -5 -13  -1 4.09218 4.60990   1
   5 -13   1 2.29657 3.43601   3
  -5 -13  -1 -0.1811 2.61774   2
   5  13   1 -0.3831 1.23771   1
  -5  13  -1 -1.4784 1.47949   2
   5  13   1 8.74441 6.80060   2
   6 -13   1 5.38600 5.26754   2
   6 -13   1 -0.4973 2.77968   3
  -6 -13  -1 -1.1536 2.82554   1
  -6 -13  -1 -1.8049 2.72624   2
   6  13   1 0.23397 2.60639   2
   6  13   1 1.22082 3.68972   1
   7 -13   1 18.6656 8.34806   2
  -7 -13  -1 29.1374 10.6935   1
   7 -13   1 5.12691 7.24306   3
  -7 -13  -1 13.3444 6.69214   2
   7  13   1 27.5521 9.53083   2
  -7  13  -1 14.5158 7.86201   2
  -8 -13  -1 -0.2603 4.32579   2
  -8 -13  -1 1.63968 3.84696   1
   8 -13   1 3.92541 7.22918   3
   8 -13   1 9.28655 6.34590   2
   8  13   1 -1.3691 3.69096   2
  -9 -13  -1 105.659 18.3502   2
   9 -13   1 86.5690 17.9667   2
  -9 -13  -1 83.0212 24.8402   1
   9 -13   1 101.597 25.3295   3
  10 -13   1 114.274 20.8029   2
  10 -13   1 126.237 29.3121   3
 -10 -13  -1 92.0326 17.9441   2
 -11 -13  -1 27.9278 10.3713   2
  11 -13   1 41.4603 12.5820   2
  10 -14  -1 -1.4776 2.57730   2
 -10 -14   1 17.2396 8.32273   2
   9 -14  -1 7.36302 7.67595   3
  -9 -14   1 3.10870 3.65682   2
   9 -14  -1 -0.8470 3.43619   2
  -9 -14   1 0.43171 4.01549   1
   8 -14  -1 6.78267 5.98649   2
  -8 -14   1 24.3723 11.3572   1
   8 -14  -1 7.13842 6.36869   3
  -8 -14   1 20.8313 8.49412   2
  -7 -14   1 203.095 21.2297   2
  -7 -14   1 187.214 22.3257   1
   7 -14  -1 223.673 26.6821   3
   7 -14  -1 173.419 20.1899   2
   7  14  -1 162.902 19.0529   2
  -6 -14   1 81.5403 16.5628   1
  -6 -14   1 46.5530 12.1832   2
   6 -14  -1 64.4543 14.5292   2
   6 -14  -1 77.0609 18.6988   3
  -6  14   1 51.3837 13.6726   2
   6  14  -1 59.1844 12.6757   2
  -5 -14   1 -1.7091 1.63968   2
   5 -14  -1 -0.3906 4.19777   3
   5 -14  -1 3.01465 4.19039   2
  -5 -14   1 -4.2525 2.62609   1
   5  14  -1 1.07022 3.97002   2
   4 -14  -1 69.5378 15.1558   2
   4 -14  -1 64.4431 14.8812   3
  -4 -14   1 102.401 18.5977   1
   4  14  -1 95.7659 17.4246   1
   4  14  -1 65.7510 13.4116   2
   3 -14  -1 167.474 19.2550   3
  -3 -14   1 173.419 17.5307   1
  -3 -14   1 121.333 18.5636   2
   3  14  -1 153.989 16.1702   1
  -3  14   1 189.380 26.8803   2
   2 -14  -1 175.860 18.9452   2
  -2 -14   1 99.9655 16.6178   2
   2 -14  -1 166.254 17.9562   3
  -2 -14   1 167.033 16.4909   1
  -2 -14   1 171.715 12.5147   3
   2  14  -1 160.968 15.7523   1
   2  14  -1 165.904 18.2604   2
  -2  14   1 175.000 11.4466   1
  -2  14   1 160.574 28.3155   2
  -2  14   1 177.427 12.1822   1
  -1 -14   1 40.1637 9.88976   1
   1 -14  -1 52.7001 12.1648   3
   1 -14  -1 43.5316 12.6874   2
  -1 -14   1 39.5758 10.4283   2
  -1 -14   1 49.6043 9.55904   3
  -1  14   1 19.6888 7.28231   2
   1  14  -1 69.3725 12.1657   1
   1  14  -1 56.7780 13.4144   2
  -1  14   1 56.3583 9.04341   1
   0 -14   1 16.2176 6.29956   1
   0 -14  -1 14.6442 6.65898   2
   0 -14  -1 13.2144 6.41272   3
   0 -14   1 18.5748 8.48409   2
   0 -14   1 11.6324 5.72985   3
   1 -14   1 102.780 10.3512   1
  -1 -14  -1 88.6408 14.8331   2
   1 -14   1 135.346 21.2864   2
  -1 -14  -1 113.470 16.3207   1
   1 -14   1 107.901 17.1773   3
  -1  14  -1 121.712 10.6647   1
   1  14   1 92.0970 13.5858   1
  -2 -14  -1 343.368 27.7064   2
  -2 -14  -1 382.995 20.1030   3
   2 -14   1 386.077 33.5634   2
  -2 -14  -1 424.128 27.2385   1
   2 -14   1 426.684 29.7172   3
  -2  14  -1 398.651 19.3804   1
   2  14   1 344.537 24.3119   1
  -2  14  -1 273.798 42.0949   2
   3 -14   1 219.938 22.4641   3
   3 -14   1 218.445 24.6042   2
  -3 -14  -1 224.667 20.4462   1
   3  14   1 237.090 20.2661   1
   3  14   1 221.041 21.6026   2
   4 -14   1 20.7701 8.50417   2
  -4 -14  -1 11.4324 6.69850   1
   4 -14   1 32.4370 11.6514   3
  -4 -14  -1 17.0331 7.99398   2
   4  14   1 3.27830 3.66254   2
   4  14   1 9.40531 7.78535   1
  -5 -14  -1 -1.4076 1.45418   2
   5 -14   1 2.61984 4.60072   2
   5 -14   1 2.32605 4.39310   3
  -5 -14  -1 -1.8831 2.99129   1
   5  14   1 6.24102 5.39842   2
  -6 -14  -1 8.57761 5.80141   2
   6 -14   1 43.7008 12.8481   2
   6 -14   1 25.4873 11.5735   3
  -6 -14  -1 22.7197 10.0142   1
   6  14   1 23.1247 8.71725   2
  -7 -14  -1 0.26147 4.50601   2
   7 -14   1 3.68395 4.22097   2
  -7 -14  -1 8.80137 6.99267   1
   7 -14   1 -2.9103 2.58849   3
   8 -14   1 22.3177 10.0577   2
  -8 -14  -1 29.3614 11.0920   2
  -8 -14  -1 22.7080 11.1329   1
   8 -14   1 31.5585 12.8249   3
  -9 -14  -1 77.9960 16.8117   2
   9 -14   1 57.4934 18.4910   3
   9 -14   1 124.143 22.0610   2
 -10 -14  -1 77.9587 17.1046   2
  10 -14   1 61.2313 15.2808   2
  10 -15  -1 0.29165 3.38496   2
 -10 -15   1 8.03640 5.78593   2
  -9 -15   1 -1.6066 2.14461   2
  -9 -15   1 -3.1578 3.00915   1
   9 -15  -1 2.38268 4.46266   2
   9 -15  -1 0.46015 3.50137   3
  -8 -15   1 13.9970 9.09853   1
  -8 -15   1 -0.3219 2.49374   2
   8 -15  -1 8.13625 8.27754   3
   8 -15  -1 5.81617 5.94756   2
   7 -15  -1 107.901 23.8502   3
  -7 -15   1 99.5878 18.8505   2
   7 -15  -1 84.0270 18.0053   2
  -7 -15   1 91.6509 20.8674   1
  -6 -15   1 53.8359 14.1687   1
   6 -15  -1 94.1333 21.4348   3
  -6 -15   1 50.2515 12.5668   2
   6 -15  -1 68.2240 15.9621   2
   5 -15  -1 36.9517 10.8900   2
   5 -15  -1 23.6958 9.89198   3
  -5 -15   1 14.9728 9.16325   1
  -5 -15   1 31.2301 10.7861   2
   5  15  -1 44.3500 12.0677   2
  -4 -15   1 36.4646 11.3058   2
   4 -15  -1 35.0223 12.4034   3
   4 -15  -1 17.4641 7.81673   2
  -4 -15   1 14.3922 7.59769   1
  -4  15   1 21.9626 9.88693   2
   4  15  -1 19.7152 7.91263   2
  -3 -15   1 104.068 18.2758   2
   3 -15  -1 103.763 19.5620   2
   3 -15  -1 120.091 21.0092   3
  -3 -15   1 106.758 17.6723   1
   3  15  -1 113.457 17.3650   1
   3  15  -1 114.948 19.9976   2
  -2 -15   1 43.2549 7.82715   3
  -2 -15   1 37.8530 10.1045   1
   2 -15  -1 23.0997 9.13521   2
  -2 -15   1 33.0740 9.56982   2
   2 -15  -1 26.3871 9.10613   3
   2  15  -1 38.7022 9.75878   1
  -2  15   1 53.0981 8.46194   1
  -2  15   1 36.7718 6.54629   1
   2  15  -1 42.3912 12.5252   2
  -1 -15   1 203.495 20.7484   2
   1 -15  -1 165.004 17.3575   3
  -1 -15   1 182.226 15.3312   3
  -1 -15   1 182.545 16.7065   1
   1 -15  -1 180.595 19.7521   2
   1  15  -1 158.302 15.3391   1
  -1  15   1 175.252 13.6489   1
   1  15  -1 187.444 20.1786   2
   0 -15   1 2.44383 3.92472   3
   0 -15   1 14.0854 5.70205   1
   0 -15   1 0.88336 4.12479   2
   0 -15  -1 7.38491 4.76058   3
   0 -15  -1 17.8165 8.30433   2
   0  15  -1 15.6755 5.95652   1
   0  15   1 0.56041 2.49340   1
   1 -15   1 130.571 15.4021   3
  -1 -15  -1 145.417 13.4569   3
   1 -15   1 110.554 17.9855   2
   1 -15   1 137.600 12.3791   1
  -1 -15  -1 122.923 14.0104   1
  -1 -15  -1 106.394 16.9831   2
  -1  15  -1 140.606 12.0769   1
   1  15   1 153.953 14.7621   1
  -2 -15  -1 3.71799 4.51829   1
   2 -15   1 5.81531 4.86237   3
   2 -15   1 6.64432 5.05146   2
  -2 -15  -1 -2.9864 1.97092   2
  -2 -15  -1 -0.8761 1.20677   3
   2  15   1 2.46066 3.65828   2
   2  15   1 2.95903 3.96680   1
  -2  15  -1 4.08787 2.56278   1
  -3 -15  -1 72.6796 14.8683   1
  -3 -15  -1 66.7516 13.9673   2
   3 -15   1 45.4992 11.9327   2
   3 -15   1 74.0693 15.9556   3
   3  15   1 94.3471 18.5852   2
  -3  15  -1 74.5443 16.1773   2
   3  15   1 56.9999 12.0989   1
   4 -15   1 13.0404 8.31081   3
  -4 -15  -1 17.8086 9.10526   1
  -4 -15  -1 21.8071 9.11865   2
   4 -15   1 21.4356 9.33082   2
   4  15   1 17.5405 7.80688   2
   5 -15   1 17.8473 8.75868   2
   5 -15   1 45.1359 14.5058   3
  -5 -15  -1 25.1777 8.97021   2
  -5 -15  -1 17.6367 9.60811   1
   6 -15   1 6.71059 6.54716   3
   6 -15   1 0.44228 3.38972   2
  -6 -15  -1 11.0773 7.90898   1
  -6 -15  -1 5.42804 6.55019   2
  -7 -15  -1 131.976 21.6201   1
   7 -15   1 155.541 23.3117   2
   7 -15   1 147.770 28.5623   3
  -7 -15  -1 100.459 17.4079   2
  -8 -15  -1 122.219 24.3248   1
   8 -15   1 102.119 20.1578   2
  -8 -15  -1 84.2764 17.5944   2
   8 -15   1 125.009 25.3048   3
   9 -15   1 10.6884 10.9740   3
   9 -15   1 18.2797 9.03800   2
  -9 -15  -1 20.6200 9.41945   2
 -10 -15  -1 31.4000 12.7856   2
  10 -15   1 30.1527 12.0488   2
  -9 -16   1 49.8999 14.1869   2
  -8 -16   1 8.28517 7.78296   1
   8 -16  -1 24.6059 13.4906   3
  -8 -16   1 13.4272 7.54924   2
   8 -16  -1 23.4356 9.99899   2
  -7 -16   1 -2.1352 3.01153   1
   7 -16  -1 -1.9799 2.67782   3
   7 -16  -1 -0.4344 2.97608   2
  -7 -16   1 12.2075 7.15044   2
   6 -16  -1 3.43580 4.46004   2
  -6 -16   1 -3.3399 2.56423   1
  -6 -16   1 -2.8500 2.40521   2
   6 -16  -1 1.02919 5.23258   3
  -5 -16   1 1.32598 4.48175   2
  -5 -16   1 -5.5909 2.32449   1
   5 -16  -1 6.37673 6.15210   2
   5 -16  -1 8.61470 8.23543   3
   4 -16  -1 4.30092 5.65488   3
   4 -16  -1 2.98805 3.97187   2
  -4 -16   1 -3.2309 2.83883   1
  -4 -16   1 9.70867 7.22500   2
   4  16  -1 3.01501 4.45805   1
   3 -16  -1 14.2450 6.73163   2
   3 -16  -1 21.4925 10.4272   3
  -3 -16   1 32.9845 10.3699   2
   3  16  -1 22.6248 10.2074   1
  -2 -16   1 153.102 22.8520   2
   2 -16  -1 140.564 20.9933   3
   2 -16  -1 116.502 19.5705   2
  -2 -16   1 132.482 11.5335   3
  -2 -16   1 164.265 17.0919   1
  -2  16   1 135.709 11.4648   1
  -2  16   1 131.689 10.4039   1
   2  16  -1 128.193 14.6812   1
  -1 -16   1 596.680 39.2355   2
   1 -16  -1 581.318 35.6435   3
  -1 -16   1 567.695 33.2181   1
  -1 -16   1 595.136 31.8183   3
   1 -16  -1 569.680 38.5593   2
  -1  16   1 617.543 29.5560   1
   1  16  -1 551.308 32.2035   1
   0 -16   1 22.3242 8.93696   2
   0 -16   1 15.1245 5.99708   1
   0 -16  -1 1.40490 3.69237   3
   0 -16  -1 25.3495 9.82290   2
   0 -16   1 23.8741 7.95908   3
   0  16  -1 16.8204 6.25116   1
   0  16   1 22.8506 7.16791   1
  -1 -16  -1 203.096 22.2421   2
   1 -16   1 263.694 24.8537   2
   1 -16   1 237.254 21.4745   3
  -1 -16  -1 178.896 15.9639   3
   1  16   1 213.360 18.1940   1
  -1  16  -1 228.741 16.1440   1
   2 -16   1 8.65209 5.47265   2
  -2 -16  -1 14.7464 4.91424   3
  -2 -16  -1 14.0670 6.87154   1
   2 -16   1 10.3207 6.80839   3
  -2 -16  -1 16.1221 8.78817   2
  -2  16  -1 13.4280 4.30646   1
   2  16   1 20.4082 7.93409   1
  -3 -16  -1 92.7076 18.2380   2
   3 -16   1 75.7324 16.6816   2
   3  16   1 62.7604 15.1209   1
  -4 -16  -1 100.127 19.7682   2
  -4 -16  -1 90.1382 17.6578   1
   4 -16   1 108.702 19.9773   2
   4 -16   1 120.514 22.6481   3
   4  16   1 78.0667 16.0362   1
   5 -16   1 3.25531 5.59165   3
  -5 -16  -1 12.3172 7.31542   2
   5 -16   1 10.8219 7.03770   2
  -5 -16  -1 17.3146 9.04324   1
  -6 -16  -1 -3.5440 2.14977   1
  -6 -16  -1 4.55645 6.21012   2
   6 -16   1 -0.5997 3.67951   2
   6 -16   1 0.00227 3.39662   3
  -7 -16  -1 123.448 22.0778   2
   7 -16   1 197.529 32.5649   3
   7 -16   1 151.053 24.8846   2
  -7 -16  -1 164.447 28.9424   1
   8 -16   1 204.108 33.5368   3
  -8 -16  -1 260.926 26.3322   2
   8 -16   1 279.791 28.4965   2
   9 -16   1 128.436 23.6891   2
  -8 -17   1 108.676 22.6840   2
   8 -17  -1 91.3523 19.4221   2
  -7 -17   1 12.6897 8.82547   1
   7 -17  -1 16.7686 9.91906   2
  -7 -17   1 1.50241 4.62371   2
   7 -17  -1 36.0718 15.7222   3
   6 -17  -1 8.80269 6.72919   2
  -6 -17   1 23.2898 8.75933   2
   6 -17  -1 16.8938 11.3481   3
  -6 -17   1 7.30821 7.04037   1
  -5 -17   1 13.1640 7.19565   2
  -5 -17   1 16.0323 8.55271   1
   5 -17  -1 47.2430 13.0914   2
   5 -17  -1 15.3296 8.81710   3
  -4 -17   1 2.35870 4.29084   2
   4 -17  -1 9.44191 7.30662   3
   4 -17  -1 4.34836 5.83009   2
  -4 -17   1 3.39462 5.21440   1
  -3 -17   1 139.088 21.7841   1
   3 -17  -1 84.0070 18.3591   3
   3 -17  -1 89.5486 19.0727   2
  -3 -17   1 140.668 24.5941   2
   2 -17  -1 186.498 20.7260   3
  -2 -17   1 160.175 17.8196   1
  -2 -17   1 196.520 14.5873   3
  -2 -17   1 183.005 27.1083   2
   2 -17  -1 217.041 23.4047   2
  -2  17   1 202.029 13.2315   1
   2  17  -1 178.091 18.0227   1
  -2  17   1 158.870 13.0997   1
   1 -17  -1 619.416 38.0513   3
  -1 -17   1 667.267 42.9721   2
  -1 -17   1 602.408 33.0062   3
  -1 -17   1 538.665 33.8123   1
   1 -17  -1 565.895 40.1583   2
   1  17  -1 594.964 34.2783   1
  -1  17   1 719.903 38.6703   1
   0 -17   1 1038.61 49.8357   3
   0 -17   1 1060.05 57.3771   2
   0 -17   1 1033.11 47.5411   1
   0 -17  -1 1043.59 49.8771   3
   0 -17  -1 923.953 54.9679   2
   0  17  -1 998.460 45.9339   1
   0  17   1 1057.92 46.7369   1
   1 -17   1 186.439 21.8453   2
   1 -17   1 144.022 17.2535   3
  -1 -17  -1 148.850 14.8602   3
  -1 -17  -1 143.785 23.0995   2
  -1  17  -1 157.230 14.3117   1
   1  17   1 136.634 14.9797   1
   2 -17   1 308.409 28.3804   2
   2 -17   1 312.789 27.1857   3
  -2 -17  -1 310.306 18.6488   3
  -2 -17  -1 326.868 29.1863   2
  -2  17  -1 292.170 17.2817   1
   2  17   1 272.808 22.8859   1
  -3 -17  -1 -2.9625 2.08982   2
   3 -17   1 3.98816 5.14896   2
   3 -17   1 10.9870 7.38066   3
  -4 -17  -1 41.1146 12.6358   2
  -4 -17  -1 39.2734 11.4616   1
   4 -17   1 28.7812 11.4897   2
   4 -17   1 18.9940 9.91838   3
   5 -17   1 0.87330 3.76001   2
  -5 -17  -1 9.47404 6.83954   1
   5 -17   1 20.8597 10.3502   3
  -5 -17  -1 -1.9024 2.13032   2
  -6 -17  -1 63.1297 15.7269   2
   6 -17   1 50.5874 15.4347   2
   6 -17   1 52.9131 16.6469   3
  -7 -17  -1 66.4479 15.9343   2
   7 -17   1 64.7379 18.3965   3
   8 -17   1 269.432 28.6256   2
  -8 -17  -1 273.240 28.1472   2
   8 -18  -1 10.6200 7.90723   2
  -8 -18   1 9.46201 7.20366   2
   7 -18  -1 -1.6095 2.22824   2
  -7 -18   1 0.99757 2.99167   1
  -7 -18   1 1.79459 4.40578   2
   7 -18  -1 -0.9038 3.71123   3
  -6 -18   1 6.53518 6.83253   2
  -6 -18   1 8.91419 8.11034   1
   6 -18  -1 7.81095 6.37984   2
  -5 -18   1 24.9920 10.0019   2
  -5 -18   1 37.0512 12.1435   1
   5 -18  -1 41.0768 12.4681   2
   5 -18  -1 38.1241 15.5313   3
   4 -18  -1 18.6230 9.52821   3
   4 -18  -1 25.2122 11.2074   2
  -4 -18   1 29.9130 11.4359   2
  -4 -18   1 31.5935 10.5327   1
   3 -18  -1 136.380 23.1654   2
  -3 -18   1 196.615 21.2179   1
   3 -18  -1 195.805 22.8642   3
  -3 -18   1 199.994 23.3972   2
   3  18  -1 224.286 41.8817   1
  -2 -18   1 421.321 30.6550   1
  -2 -18   1 411.793 34.4884   2
   2 -18  -1 386.969 33.4405   2
  -2 -18   1 491.785 29.1943   3
   2 -18  -1 384.444 47.0551   3
  -2  18   1 429.231 22.5732   1
  -2  18   1 416.214 21.3437   1
  -1 -18   1 578.048 41.8835   2
   1 -18  -1 612.748 42.2873   2
  -1 -18   1 560.180 34.5742   1
  -1 -18   1 590.857 32.7282   3
   1 -18  -1 582.098 37.3912   3
  -1  18   1 637.764 30.8448   1
  -1  18   1 551.386 31.1133   1
   1  18  -1 552.226 33.7929   1
   0 -18  -1 33.5244 9.95988   3
   0 -18   1 14.6534 7.13296   3
   0 -18   1 15.5041 8.38354   2
   0 -18  -1 31.0692 10.7375   2
   0  18  -1 13.1178 5.93324   1
   0  18   1 32.3521 8.64848   1
   1 -18   1 351.365 27.9208   3
   1 -18   1 322.245 30.3005   2
  -1 -18  -1 347.770 23.7477   3
  -1 -18  -1 332.178 30.7452   2
  -1  18  -1 352.985 21.9669   1
   1  18   1 352.089 25.3248   1
  -2 -18  -1 55.6467 9.48406   3
   2 -18   1 61.0553 15.6344   3
   2 -18   1 79.5645 19.2678   2
  -2 -18  -1 57.2296 17.1128   2
  -2  18  -1 67.7385 10.8504   1
  -2  18  -1 67.6674 7.80996   1
  -3 -18  -1 1.52052 4.20543   2
   3 -18   1 3.90247 5.10415   2
   3 -18   1 -0.3748 4.68209   3
   4 -18   1 -1.0459 3.17622   3
  -4 -18  -1 -3.1649 2.51569   2
   4 -18   1 -3.0177 3.13076   2
   5 -18   1 12.7910 9.19844   3
  -5 -18  -1 8.44295 6.77920   2
  -6 -18  -1 98.7593 21.0865   2
   6 -18   1 97.4571 26.7386   3
   6 -18   1 117.386 21.4067   2
   7 -18   1 62.9991 20.3624   3
  -7 -18  -1 65.9906 17.4231   2
   7 -18   1 59.5418 15.8618   2
  -7 -19   1 -1.5969 3.32315   2
   6 -19  -1 57.2863 15.5065   2
   6 -19  -1 63.2505 19.5489   3
  -6 -19   1 89.3926 21.2493   2
  -6 -19   1 85.9595 19.1470   1
   5 -19  -1 -4.5264 2.66037   3
  -5 -19   1 5.27090 6.36299   2
  -5 -19   1 4.54070 4.76992   1
   5 -19  -1 4.67339 7.77232   2
  -4 -19   1 116.031 25.1539   2
   4 -19  -1 111.103 22.9393   2
   4 -19  -1 127.494 24.7259   3
  -4 -19   1 149.991 24.7652   1
  -3 -19   1 192.420 39.1573   2
   3 -19  -1 109.497 21.8452   3
   3 -19  -1 115.000 28.8373   2
  -3 -19   1 124.525 21.2069   1
  -2 -19   1 29.5026 10.3343   1
  -2 -19   1 12.0709 7.86167   2
   2 -19  -1 44.7258 18.8904   2
   2 -19  -1 12.8788 7.11713   3
  -2  19   1 13.8866 4.30060   1
  -2  19   1 19.8929 5.48133   1
   1 -19  -1 155.955 26.1322   2
   1 -19  -1 164.041 18.9594   3
  -1 -19   1 117.674 22.4438   2
  -1 -19   1 125.240 13.9557   3
   1  19  -1 133.888 15.7968   1
  -1  19   1 154.799 15.3709   1
  -1  19   1 148.209 13.6420   1
   0 -19  -1 143.369 24.8011   2
   0 -19   1 192.018 19.1261   3
   0 -19  -1 194.941 18.9062   3
   0 -19   1 145.593 23.7475   2
   0  19   1 182.584 16.9115   1
   0  19  -1 183.428 16.8411   1
  -1 -19  -1 113.794 13.3285   3
   1 -19   1 137.623 20.9513   3
  -1 -19  -1 152.982 25.0758   2
   1 -19   1 171.616 27.7489   2
  -1  19  -1 131.065 12.9154   1
   1  19   1 144.136 20.5951   1
   2 -19   1 -0.5375 2.74564   3
  -2 -19  -1 0.06270 2.91246   2
   2 -19   1 4.43368 10.0116   2
   2  19   1 -4.2144 3.56176   1
  -2  19  -1 1.21451 3.16006   1
  -2  19  -1 2.26866 2.23258   1
  -3 -19  -1 2.00406 6.88650   2
   3 -19   1 1.04282 3.98737   2
   3 -19   1 8.22260 5.84685   3
   4 -19   1 4.07458 5.01592   2
   4 -19   1 25.6501 11.6033   3
  -4 -19  -1 29.1208 12.3042   2
   5 -19   1 92.3572 20.0605   2
  -5 -19  -1 45.6876 14.2598   2
   5 -19   1 69.5886 18.0781   3
   6 -19   1 6.86326 6.63071   3
  -6 -19  -1 -0.4845 3.82453   2
   6 -19   1 -0.2666 3.99937   2
  -5 -20   1 5.55492 7.80269   2
   5 -20  -1 32.7761 12.8291   3
  -4 -20   1 26.3471 11.6483   2
   4 -20  -1 26.9752 10.9214   3
   4 -20  -1 18.2392 9.42914   2
  -3 -20   1 175.239 29.0516   2
   3 -20  -1 157.517 26.9007   3
   3 -20  -1 140.686 23.6741   2
  -2 -20   1 74.2668 18.8859   2
  -2 -20   1 57.3613 14.2744   3
   2 -20  -1 64.0215 15.8076   3
   2 -20  -1 42.9155 13.4470   2
  -2  20   1 52.5322 7.95525   1
  -2  20   1 66.8276 7.75303   1
   1 -20  -1 59.6332 16.0557   2
  -1 -20   1 71.6081 17.5486   2
   1 -20  -1 52.7407 15.1328   3
  -1 -20   1 61.6228 12.6882   3
  -1  20   1 73.5718 12.1515   1
  -1  20   1 80.6243 13.1379   1
   0 -20  -1 0.63030 2.29401   2
   0 -20   1 27.4313 9.62412   3
   0 -20   1 17.1300 9.30188   2
   0 -20  -1 11.0360 6.13770   3
   0  20   1 20.8275 8.02851   1
   0  20  -1 4.87912 3.96653   1
   0  20   1 12.5548 6.82339   1
  -1 -20  -1 9.77644 7.23285   2
   1 -20   1 11.0719 7.40043   2
  -1 -20  -1 5.74682 4.20766   3
   1 -20   1 12.0505 7.51908   3
  -1  20  -1 6.61958 5.07770   1
  -1  20  -1 12.2488 5.24011   1
   2 -20   1 25.7322 12.3686   2
  -2 -20  -1 35.3532 14.1449   2
   2 -20   1 73.1463 17.7004   3
  -2  20  -1 62.6647 9.04156   1
  -2  20  -1 57.5142 9.18534   1
   3 -20   1 15.6484 8.66218   3
  -3 -20  -1 27.8698 11.6689   2
   3 -20   1 10.4009 7.69826   2
  -4 -20  -1 2.29841 5.05362   2
   4 -20   1 1.31618 4.34210   3
   5 -20   1 -2.5778 2.99271   3
   4 -21  -1 96.2200 24.2585   3
   3 -21  -1 55.8147 16.9056   3
   2 -21  -1 1.22069 3.43935   3
  -1 -21   1 4.64943 3.75702   3
   1 -21  -1 5.83894 5.80890   3
  -1  21   1 3.02470 4.43748   1
  -1  21   1 9.05526 5.01215   1
   1  21  -1 2.42936 5.06033   1
   0 -21  -1 16.1911 7.87716   3
   0 -21   1 3.01711 3.64289   3
   0  21  -1 8.87802 5.91257   1
   0  21   1 6.49283 4.80851   1
   0  21   1 18.1525 8.35685   1
   1 -21   1 -1.8965 2.26302   3
  -1 -21  -1 0.45015 2.75777   3
  -1  21  -1 0.17241 3.94776   1
   1  21   1 -1.9420 3.15124   1
  -1  21  -1 5.20715 4.32994   1
   1  21   1 13.8798 7.39271   1
   2 -21   1 1.71212 4.57104   3
   3 -21   1 0.11743 3.26722   3
   4 -21   1 29.8629 12.7889   3
  -1 -22   1 5.62229 6.54142   3
   1 -22  -1 5.07544 6.59156   3
   0 -22   1 12.4466 9.19611   3
   0 -22  -1 9.50915 6.05769   3
   0  22  -1 12.0410 6.28343   1
   0  22   1 3.32535 4.30457   1
   1 -22   1 5.58094 5.90840   3
   1  22   1 28.9109 11.4851   1
  13   0  -2 1.36540 3.81295   3
  13   0  -2 1.17465 2.33041   2
  13   0  -2 -0.3260 1.85657   2
  12   0  -2 5.49699 5.26781   3
  12   0  -2 -3.2714 2.36323   1
  12   0  -2 0.61723 2.14948   2
  12   0  -2 3.50739 2.91722   2
  11   0  -2 3.67154 3.58764   2
  11   0  -2 2.53818 4.68708   1
  11   0  -2 -0.2489 3.11285   2
  11   0  -2 4.82534 5.28224   3
  10   0  -2 4.71408 4.10002   1
  10   0  -2 13.5503 4.43507   2
  10   0  -2 11.1161 4.18131   2
 -10   0   2 12.9490 6.08824   1
  10   0  -2 11.2676 6.81227   3
   9   0  -2 3.81290 2.77312   2
   9   0  -2 -1.3669 1.72854   3
  -9   0   2 -4.1067 2.16966   1
   9   0  -2 1.52256 2.48424   2
   9   0  -2 4.41388 3.57066   1
   8   0  -2 24.3256 9.15040   3
   8   0  -2 27.0892 6.12225   2
   8   0  -2 24.5434 5.36213   2
  -8   0   2 30.8113 7.52109   1
   8   0  -2 25.1641 7.45056   1
  -7   0   2 2.64164 2.53481   3
   7   0  -2 2.00852 2.25047   2
  -7   0   2 0.29312 2.16356   1
   7   0  -2 0.89298 1.70223   2
   7   0  -2 -2.2582 2.41947   3
   7   0  -2 2.81087 2.92535   1
   6   0  -2 85.8927 7.37017   2
   6   0  -2 93.1401 9.60722   1
  -6   0   2 92.2262 10.4961   3
   6   0  -2 96.6216 10.7432   3
   6   0  -2 103.783 7.45837   2
  -6   0   2 95.5868 9.83979   1
  -5   0   2 0.07683 1.92819   3
  -5   0   2 -0.1442 1.85791   1
   5   0  -2 4.18424 3.04133   3
   5   0  -2 -0.3871 1.05466   2
   5   0  -2 0.53055 1.70866   1
   5   0  -2 -0.8439 0.81499   2
  -4   0   2 2667.01 89.8559   4
  -4   0   2 2759.44 89.9249   4
   4   0  -2 2762.87 95.5580   4
   4   0  -2 2630.82 93.4798   4
  -3   0   2 0.49276 1.41001   3
   3   0  -2 0.96313 1.55099   3
   3   0  -2 1.36353 1.52047   1
   3   0  -2 1.70276 0.94351   2
  -3   0   2 0.32175 1.26871   1
   2   0  -2 7.90883 2.36572   3
  -2   0   2 4.31566 1.64244   1
   2   0  -2 5.49214 0.86378   2
  -2   0   2 4.99933 2.00982   3
   2   0  -2 8.01286 2.19927   1
   2   0  -2 5.37526 0.89498   2
   1   0  -2 1.40086 0.91847   3
   1   0  -2 0.56344 0.75219   1
  -1   0   2 0.39507 0.74512   3
  -1   0   2 1.23722 0.91867   1
   0   0   2 8255.41 247.411   4
  -1   0  -2 0.47670 0.91128   2
  -1   0  -2 0.56467 0.91687   1
   1   0   2 0.68775 0.88167   1
   1   0   2 1.03318 0.87344   2
   2   0   2 21.7162 3.86275   1
   2   0   2 31.6480 3.66646   2
   3   0   2 3.18239 1.92033   2
   3   0   2 0.47602 1.52187   1
   4   0   2 409.056 21.3199   3
   4   0   2 362.665 18.1454   2
   4   0   2 378.676 19.2427   1
   5   0   2 4.71156 3.08031   2
   5   0   2 3.30692 2.56204   1
   5   0   2 0.70990 2.30867   3
   5   0   2 0.01325 1.31010   2
   6   0   2 2906.22 94.9744   2
   6   0   2 2836.55 96.1801   2
   6   0   2 2772.91 96.6781   1
   6   0   2 2729.98 99.9659   3
   7   0   2 9.63783 6.45461   3
   7   0   2 13.2845 5.87346   1
   7   0   2 2.09817 3.81595   2
   7   0   2 5.25884 4.13192   2
   8   0   2 702.081 36.0875   2
   8   0   2 667.187 37.8000   3
   8   0   2 612.045 34.1294   1
   8   0   2 685.518 33.8533   2
   9   0   2 -1.8910 1.36881   1
   9   0   2 -0.1858 2.00666   2
   9   0   2 -1.3832 1.48314   3
   9   0   2 -2.0164 1.75642   2
  10   0   2 11.8411 6.75858   1
  10   0   2 10.6490 6.90499   3
  10   0   2 6.12941 4.69290   2
  10   0   2 4.87897 4.56596   2
  11   0   2 -0.3576 2.24667   1
  11   0   2 -2.0737 2.67785   2
  11   0   2 3.22427 4.58936   1
  11   0   2 1.81026 5.24733   2
  11   0   2 -1.1514 3.24134   3
  12   0   2 42.5846 10.4695   2
  12   0   2 24.7559 8.21461   2
  12   0   2 32.7955 11.9903   3
  12   0   2 20.9366 8.55083   1
  13   0   2 0.51929 3.75535   2
  13   0   2 0.52552 3.08976   1
  13   0   2 3.57185 5.33544   3
  13   0   2 3.59066 3.51401   2
  13  -1  -2 1.74856 4.32763   3
  13  -1  -2 4.12425 3.90304   2
  13  -1  -2 0.36340 2.08825   2
  13   1  -2 14.3357 8.53982   3
  13   1  -2 1.42230 2.02877   2
  13   1  -2 5.41926 3.22500   2
  12  -1  -2 42.5951 8.04271   2
  12  -1  -2 40.4655 13.4322   3
  12  -1  -2 43.6386 8.48021   2
  12  -1  -2 32.7706 10.7425   1
  12   1  -2 58.3731 14.4675   3
  12   1  -2 45.2994 9.20452   2
  12   1  -2 36.0559 6.95478   2
  11  -1  -2 378.836 30.7936   3
  11  -1  -2 279.056 17.9794   2
  11  -1  -2 277.048 18.9350   2
  11  -1  -2 325.521 24.9362   1
 -11  -1   2 319.767 25.7578   1
  11   1  -2 284.358 25.7179   3
  11   1  -2 281.523 18.9591   2
  11   1  -2 290.645 18.1464   2
  11   1  -2 307.262 25.8861   1
 -10  -1   2 121.105 17.7982   1
  10  -1  -2 82.8010 13.6287   1
  10  -1  -2 102.281 10.4730   2
  10  -1  -2 109.825 19.4964   3
  10  -1  -2 94.3880 9.39526   2
  10   1  -2 90.5972 15.3940   1
  10   1  -2 93.6677 9.98857   2
  10   1  -2 62.8860 13.7410   3
 -10   1   2 109.101 16.7921   1
  10   1  -2 108.235 9.97918   2
   9  -1  -2 95.3005 9.81351   2
   9  -1  -2 104.869 15.6454   1
  -9  -1   2 82.3222 14.4972   1
   9  -1  -2 93.6619 16.5159   3
   9  -1  -2 108.152 9.48748   2
   9   1  -2 100.360 9.88039   2
   9   1  -2 100.412 9.15646   2
  -9   1   2 92.6007 14.1783   1
   9   1  -2 102.663 16.5601   1
   9   1  -2 93.7090 16.0583   3
   8  -1  -2 24.1109 5.95233   2
   8  -1  -2 20.6249 7.65695   3
   8  -1  -2 29.8062 7.87290   1
   8  -1  -2 19.5039 5.08003   2
  -8  -1   2 16.8130 6.78046   1
   8   1  -2 16.4179 4.50415   2
   8   1  -2 12.8432 4.58399   2
   8   1  -2 11.7854 5.49454   1
  -8   1   2 19.3913 6.55525   1
   8   1  -2 8.76565 4.96926   3
   7  -1  -2 67.6231 10.6482   1
   7  -1  -2 66.9900 7.11533   2
  -7  -1   2 74.8284 12.0714   1
   7  -1  -2 62.6354 13.0666   3
   7  -1  -2 72.4293 6.94858   2
   7   1  -2 66.4985 12.0325   3
   7   1  -2 72.8842 11.9549   1
   7   1  -2 74.4475 7.45573   2
  -7   1   2 70.3188 12.3042   3
   7   1  -2 74.0063 6.92895   2
  -7   1   2 66.8188 10.3028   1
  -6  -1   2 143.714 12.6349   1
   6  -1  -2 147.299 14.0612   3
   6  -1  -2 150.423 10.1742   2
   6  -1  -2 172.653 12.6115   1
   6  -1  -2 156.718 9.85148   2
  -6  -1   2 184.650 14.3576   3
  -6   1   2 137.137 11.4184   1
  -6   1   2 155.363 14.4056   3
   6   1  -2 153.365 13.1264   3
   6   1  -2 163.009 9.80823   2
   6   1  -2 154.455 10.1189   2
   6   1  -2 173.697 13.7007   1
   5  -1  -2 515.518 23.9134   1
   5  -1  -2 519.679 27.4122   3
  -5  -1   2 524.324 25.5956   1
  -5  -1   2 549.384 26.0322   3
   5  -1  -2 529.547 21.2004   2
   5  -1  -2 512.754 21.5343   2
   5   1  -2 580.081 26.3717   1
  -5   1   2 526.729 27.4672   3
   5   1  -2 535.052 25.6862   3
   5   1  -2 539.572 20.9446   2
  -5   1   2 552.347 24.2646   1
   4  -1  -2 710.820 32.1204   3
  -4  -1   2 722.442 25.9546   2
  -4  -1   2 745.275 30.6077   1
  -4  -1   2 736.065 30.4182   3
   4  -1  -2 700.044 26.4321   2
   4  -1  -2 722.573 28.7669   1
   4   1  -2 757.058 30.8278   1
   4   1  -2 798.188 26.2355   2
  -4   1   2 752.056 32.7056   3
  -4   1   2 765.382 28.9068   1
   4   1  -2 760.121 30.5000   3
   3  -1  -2 802.040 32.9643   3
  -3  -1   2 862.168 31.3067   3
  -3  -1   2 863.011 31.9946   1
   3  -1  -2 806.005 27.9835   2
   3  -1  -2 839.506 30.0001   1
  -3   1   2 840.683 28.0306   2
  -3   1   2 825.019 33.1904   3
   3   1  -2 851.417 31.1675   3
   3   1  -2 853.632 31.9408   1
   2  -1  -2 16.3118 1.83904   2
   2  -1  -2 23.5259 2.68225   1
  -2  -1   2 15.3190 1.63133   2
  -2  -1   2 17.7698 3.49111   1
   2  -1  -2 21.1138 4.24061   3
  -2  -1   2 19.2000 3.35118   3
   2   1  -2 17.4234 3.38543   1
  -2   1   2 22.5268 3.17038   1
  -2   1   2 19.7209 4.41239   3
   2   1  -2 11.8427 2.66389   3
   2   1  -2 17.4134 1.69369   2
  -2   1   2 21.4991 2.09605   2
   1  -1  -2 3019.45 98.3804   4
   1  -1  -2 3183.77 98.1099   4
  -1  -1   2 3049.06 97.8020   4
  -1  -1   2 2693.06 99.8931   4
  -1   1   2 3145.55 98.2649   4
   1   1  -2 2903.97 100.732   4
  -1   1   2 2898.22 101.443   4
   1   1  -2 3082.10 98.1121   4
   0  -1   2 22.2434 2.27179   2
   0  -1  -2 22.0009 2.18561   2
   0  -1   2 20.8267 3.04342   1
   0  -1  -2 19.5817 2.88008   1
   0   1   2 21.6411 2.28659   1
   0   1  -2 22.6018 2.68898   1
   0   1  -2 24.4973 2.72525   2
   0   1   2 24.6149 2.29630   2
   1  -1   2 868.762 30.1681   4
  -1  -1  -2 855.428 29.9293   4
  -1  -1  -2 864.044 29.8818   4
   1  -1   2 864.276 30.3316   4
  -1   1  -2 842.128 29.4837   4
   1   1   2 820.298 30.3407   4
   1   1   2 849.061 30.1525   4
  -1   1  -2 865.272 29.2115   4
   2  -1   2 6.35833 2.25871   1
   2  -1   2 1.98626 1.58327   2
  -2  -1  -2 4.68987 1.90511   2
   2   1   2 4.33887 1.76658   2
   2   1   2 6.41430 2.22203   1
   3  -1   2 1045.68 37.0273   1
   3  -1   2 954.924 40.0071   3
  -3  -1  -2 1051.28 38.6930   1
   3  -1   2 1047.57 38.0825   2
   3   1   2 1077.98 39.0025   1
  -4  -1  -2 61.5217 6.44908   2
   4  -1   2 55.5423 6.26387   1
   4  -1   2 69.7923 7.06508   2
   4  -1   2 63.6204 9.69784   3
   4  -1   2 71.1887 6.91589   2
  -4  -1  -2 65.0878 7.34053   1
   4   1   2 63.0324 7.31483   3
   4   1   2 62.7194 7.24586   1
   4   1   2 69.9177 6.71998   2
   5  -1   2 4.12708 2.56303   2
   5  -1   2 2.59888 2.26085   1
   5  -1   2 3.69151 2.72601   2
   5   1   2 6.08862 3.65998   3
   5   1   2 1.81314 2.13137   2
   5   1   2 5.54790 3.50266   1
   6  -1   2 452.369 23.8078   1
   6  -1   2 455.336 26.8830   2
   6  -1   2 449.242 27.6424   3
   6  -1   2 445.078 23.1172   2
   6   1   2 477.007 25.6741   1
   6   1   2 437.534 22.6822   2
   7  -1   2 3307.20 115.445   1
   7  -1   2 3476.90 114.090   2
   7  -1   2 3381.72 115.273   2
   7  -1   2 3408.47 122.336   3
   7   1   2 3358.57 113.259   2
   7   1   2 3499.21 119.585   3
   7   1   2 3444.73 118.339   1
   7   1   2 3357.13 114.990   2
   8  -1   2 230.234 21.1746   3
   8  -1   2 223.417 17.6051   2
   8  -1   2 250.615 18.8132   1
   8   1   2 237.240 20.0331   3
   8   1   2 263.554 19.9530   2
   8   1   2 211.603 18.5992   1
   8   1   2 213.768 17.2337   2
   9  -1   2 -0.4301 1.79320   3
   9  -1   2 3.58553 3.18007   2
   9  -1   2 -0.8923 1.93676   1
   9  -1   2 -2.3967 1.06902   2
   9   1   2 -0.2896 1.80949   1
   9   1   2 3.58226 3.56066   2
   9   1   2 -1.2355 1.96720   3
   9   1   2 -0.2294 2.19518   2
  10  -1   2 10.3488 6.44589   1
  10  -1   2 21.1964 7.59245   1
  10  -1   2 15.1520 6.59359   2
  10  -1   2 17.1533 6.15892   2
  10  -1   2 18.1370 8.60392   3
  10   1   2 20.8712 6.98210   2
  10   1   2 18.9108 7.90253   3
  10   1   2 17.2636 7.21549   2
  10   1   2 30.2237 9.61163   1
  11  -1   2 61.2405 15.7128   1
  11  -1   2 53.9645 12.0747   2
  11  -1   2 63.5741 16.2341   3
  11  -1   2 66.1256 14.5997   1
  11  -1   2 41.8873 10.2406   2
  11   1   2 54.5730 11.0544   2
  11   1   2 61.3518 14.1153   3
  11   1   2 51.8026 14.3112   1
  11   1   2 37.5883 10.3242   2
  12  -1   2 6.78479 5.42346   1
  12  -1   2 6.29432 5.97671   1
  12  -1   2 10.5589 6.60611   2
  12  -1   2 5.31264 5.32325   3
  12  -1   2 16.7535 7.46340   2
  12   1   2 7.71487 7.20401   1
  12   1   2 21.1167 8.92793   3
  12   1   2 20.4857 7.58743   2
  12   1   2 13.7263 6.04702   2
  13  -1   2 19.0824 10.9432   3
  13  -1   2 2.58040 4.42799   2
  13  -1   2 2.20639 3.66511   1
  13  -1   2 2.47211 3.66988   2
  13   1   2 2.22093 3.43012   2
  13   1   2 0.86231 2.70944   2
  13   1   2 6.71369 6.81092   3
  13   1   2 -0.5794 3.43663   1
  13  -2  -2 12.4815 8.33657   3
  13  -2  -2 6.35992 5.89569   1
  13  -2  -2 5.28141 3.81442   2
  13  -2  -2 8.41314 5.40730   1
  13   2  -2 6.75854 5.42462   2
  13   2  -2 9.79402 6.65338   3
  13   2  -2 1.12805 2.31157   2
  12  -2  -2 60.8432 10.1278   2
  12  -2  -2 31.9347 11.4127   3
  12   2  -2 40.5397 7.66162   2
  12   2  -2 53.8289 9.44519   2
  12   2  -2 52.4786 15.8100   3
  11  -2  -2 205.980 23.9754   3
  11  -2  -2 207.754 15.3738   2
  11  -2  -2 204.708 16.1422   2
 -11  -2   2 194.958 20.7745   1
  11  -2  -2 219.916 19.7394   1
  11   2  -2 210.829 21.8370   1
  11   2  -2 244.335 16.0640   2
  11   2  -2 237.168 22.4330   3
  11   2  -2 213.342 16.2175   2
 -10  -2   2 226.904 21.1156   1
  10  -2  -2 250.356 16.2070   2
  10  -2  -2 246.382 17.1204   2
  10  -2  -2 274.919 20.7148   1
  10  -2  -2 249.763 24.6195   3
  10   2  -2 230.109 16.4978   2
  10   2  -2 233.557 15.6717   2
  10   2  -2 234.300 21.6814   1
  10   2  -2 231.359 21.0529   3
   9  -2  -2 2.67128 4.01880   1
   9  -2  -2 5.46402 4.82496   3
  -9  -2   2 1.09403 4.48437   1
   9  -2  -2 3.46690 2.63709   2
   9   2  -2 -0.3183 2.31359   2
   9   2  -2 2.98156 3.67477   3
  -9   2   2 -1.2254 3.56038   1
   9   2  -2 -1.4279 2.45854   1
   9   2  -2 6.39515 3.24117   2
  -8  -2   2 292.868 21.8133   1
   8  -2  -2 283.603 19.2933   1
   8  -2  -2 302.382 24.0820   3
   8  -2  -2 276.260 16.9532   2
   8  -2  -2 273.358 16.0965   2
   8   2  -2 238.340 22.1062   1
  -8   2   2 286.974 19.1962   1
   8   2  -2 295.116 17.1370   2
   8   2  -2 275.130 16.0510   2
   8   2  -2 286.828 20.5376   3
   7  -2  -2 4.50476 2.83892   2
  -7  -2   2 6.60051 4.70752   1
   7  -2  -2 2.05052 2.88334   1
   7  -2  -2 3.57229 2.63309   2
   7  -2  -2 2.23492 3.84928   3
  -7   2   2 -2.0596 1.30569   3
   7   2  -2 0.68640 2.49115   1
  -7   2   2 4.36746 3.60819   1
   7   2  -2 2.18826 3.15838   3
   7   2  -2 4.26027 2.41619   2
  -6  -2   2 10.9300 4.61355   3
   6  -2  -2 4.37116 2.23121   2
   6  -2  -2 5.56164 2.71385   2
  -6  -2   2 7.55838 4.14039   1
   6  -2  -2 3.33659 2.55450   1
   6  -2  -2 0.54163 2.41218   3
  -6   2   2 2.25714 2.85756   3
   6   2  -2 6.13889 2.84435   2
   6   2  -2 6.90476 3.64544   3
   6   2  -2 3.57418 3.14948   1
  -6   2   2 3.17221 2.74738   1
   5  -2  -2 538.576 29.1044   3
  -5  -2   2 570.716 22.4020   2
  -5  -2   2 553.772 25.5529   3
   5  -2  -2 586.364 23.4983   2
  -5  -2   2 500.704 26.7535   1
   5  -2  -2 562.186 24.1067   1
  -5   2   2 548.599 23.8177   1
   5   2  -2 562.170 27.3743   1
  -5   2   2 545.910 29.1582   3
   5   2  -2 592.012 22.5901   2
   5   2  -2 560.743 25.3846   3
   4  -2  -2 1491.89 49.1887   1
  -4  -2   2 1460.33 53.0175   1
   4  -2  -2 1448.22 48.6560   2
   4  -2  -2 1426.41 55.2680   3
  -4  -2   2 1464.08 50.6585   3
  -4   2   2 1475.55 48.9882   1
  -4   2   2 1430.90 55.2441   3
   4   2  -2 1378.58 52.5524   1
   3  -2  -2 497.200 23.8965   3
   3  -2  -2 514.880 19.5212   2
   3  -2  -2 516.799 19.1838   1
  -3  -2   2 487.209 19.9312   3
  -3  -2   2 540.291 19.0246   2
  -3  -2   2 495.586 22.3900   1
  -3   2   2 515.591 19.0619   1
  -3   2   2 485.661 23.6501   3
   3   2  -2 557.033 19.1349   2
   3   2  -2 463.031 21.9242   1
  -3   2   2 476.649 19.3424   2
   3   2  -2 517.432 20.1307   3
  -2  -2   2 205.777 9.08142   3
   2  -2  -2 189.093 11.6354   3
  -2  -2   2 199.697 11.0805   1
  -2  -2   2 195.252 8.83963   2
   2  -2  -2 211.881 9.32966   2
  -2   2   2 194.958 11.8078   3
  -2   2   2 199.529 8.30622   1
  -2   2   2 199.795 9.33888   2
   2   2  -2 201.821 11.0707   1
   2   2  -2 198.727 8.97287   3
   2   2  -2 190.180 8.76539   2
   1  -2  -2 6.67134 1.73918   2
   1  -2  -2 11.7482 1.86639   1
  -1  -2   2 9.91090 2.06275   2
   1  -2  -2 12.7705 2.92793   3
  -1  -2   2 8.32745 2.22380   1
   1   2  -2 8.94242 1.94483   2
   1   2  -2 6.87465 2.20127   1
  -1   2   2 7.09544 2.21425   3
  -1   2   2 9.34190 1.70032   1
  -1   2   2 7.44269 1.76254   2
   0  -2  -2 1839.94 65.1083   4
   0  -2  -2 1837.63 64.4973   4
   0  -2   2 1827.61 65.4680   4
   0  -2   2 1851.67 65.8373   4
   0   2  -2 1840.60 65.8127   4
   0   2   2 1861.41 65.3776   4
   0   2  -2 1943.31 66.4872   4
   1  -2   2 125.701 7.75539   2
  -1  -2  -2 130.271 7.50746   2
   1  -2   2 121.960 6.26965   1
   1   2   2 119.516 7.49634   1
  -1   2  -2 127.859 6.47346   1
   1   2   2 126.517 7.42021   2
  -1   2  -2 130.435 7.88015   2
   2  -2   2 128.350 8.64878   2
  -2  -2  -2 132.524 8.97321   1
  -2  -2  -2 122.907 8.10788   2
   2  -2   2 136.052 7.25928   1
   2   2   2 125.520 8.13629   2
   2   2   2 132.570 8.98752   1
  -2   2  -2 136.572 8.88214   2
  -2   2  -2 128.692 7.37241   1
  -3  -2  -2 169.779 10.6265   2
   3  -2   2 172.591 11.1774   2
   3  -2   2 175.715 9.77417   1
  -3  -2  -2 191.677 12.1652   1
   3  -2   2 195.929 13.7336   3
   3  -2   2 177.353 9.84089   1
   3   2   2 182.243 12.0009   1
   3   2   2 186.433 10.9371   2
  -3   2  -2 167.133 11.0274   2
   4  -2   2 21.8160 5.83085   3
  -4  -2  -2 29.8544 5.83418   2
   4  -2   2 24.1607 4.67248   1
   4  -2   2 19.1823 4.50448   1
   4  -2   2 20.2212 4.88679   2
  -4  -2  -2 16.6872 4.97291   1
   4   2   2 16.0758 4.01581   2
   4   2   2 21.5451 4.84128   3
   4   2   2 20.7005 5.80230   1
   5  -2   2 171.481 12.5327   2
  -5  -2  -2 160.873 11.6577   2
   5  -2   2 143.766 14.0695   3
   5  -2   2 144.604 10.8259   1
  -5  -2  -2 133.467 12.1694   1
   5   2   2 156.975 13.0617   1
   5   2   2 161.293 12.2767   3
   5   2   2 154.693 11.3605   2
   6  -2   2 616.932 28.3647   2
   6  -2   2 577.677 27.2143   1
   6  -2   2 560.161 31.3436   2
  -6  -2  -2 580.343 30.1684   1
   6  -2   2 574.228 33.1113   3
   6   2   2 598.600 29.3461   3
   6   2   2 554.090 26.8432   2
   6   2   2 564.834 33.7479   1
   7  -2   2 380.210 21.8940   1
   7  -2   2 343.483 26.0638   3
   7  -2   2 376.346 22.6300   2
  -7  -2  -2 362.236 23.8437   1
   7  -2   2 365.794 21.6329   2
   7   2   2 343.709 22.5751   3
   7   2   2 342.190 20.4916   2
   7   2   2 325.391 23.0556   1
   8  -2   2 68.8238 11.6323   2
   8  -2   2 77.4486 12.3198   2
   8  -2   2 120.021 20.2999   3
   8  -2   2 65.7601 11.6114   1
   8  -2   2 77.8928 12.2981   1
   8   2   2 64.4796 12.0872   3
   8   2   2 76.0778 13.6559   1
   9  -2   2 42.7116 10.0463   2
   9  -2   2 40.7070 9.46501   1
   9  -2   2 45.1837 9.33595   2
   9  -2   2 78.3601 17.0772   3
   9  -2   2 46.9067 10.6007   1
   9   2   2 38.3571 9.95954   3
   9   2   2 41.3522 10.9340   1
   9   2   2 37.9778 8.22294   2
   9   2   2 47.6441 9.82039   2
  10  -2   2 16.5517 7.51397   2
  10  -2   2 6.94682 5.66539   1
  10  -2   2 2.03523 5.78830   3
  10  -2   2 9.14858 4.70126   2
  10  -2   2 2.97504 4.41491   1
  10   2   2 5.67235 5.04705   2
  10   2   2 9.81875 6.96195   1
  10   2   2 2.15197 3.75036   2
  10   2   2 6.64273 4.42105   3
  11  -2   2 310.679 22.5705   2
  11  -2   2 278.038 23.6521   1
  11  -2   2 320.725 24.5041   2
  11  -2   2 306.977 30.0150   3
  11  -2   2 315.572 25.3864   1
  11   2   2 295.023 22.0060   2
  11   2   2 318.200 24.2730   2
  11   2   2 357.502 27.9186   3
  11   2   2 273.737 30.7889   1
  12  -2   2 0.70259 3.76211   1
  12  -2   2 4.74475 4.96269   3
  12  -2   2 4.30010 4.14920   2
  12  -2   2 2.60637 3.69943   1
  12  -2   2 13.5456 7.13048   2
  12   2   2 8.70745 6.47330   3
  12   2   2 8.87983 6.01170   2
  12   2   2 7.50639 4.66829   2
  13  -2   2 5.13104 5.80018   3
  13  -2   2 14.7032 6.93444   1
  13   2   2 8.99809 7.30935   3
  13   2   2 3.44244 3.74949   2
  13   2   2 -0.2258 3.59703   1
  13   2   2 -1.0495 2.48561   2
  13  -3  -2 6.62139 6.71672   1
  13  -3  -2 10.6500 6.52366   1
  13  -3  -2 6.16574 3.52569   2
  13  -3  -2 8.96167 8.23003   3
  13   3  -2 1.91231 2.50542   2
  13   3  -2 7.12510 6.29295   3
  12  -3  -2 98.5307 16.7887   1
  12  -3  -2 93.7743 10.7852   2
  12  -3  -2 116.260 23.2443   3
  12  -3  -2 102.129 10.9283   2
  12  -3  -2 148.421 16.8586   1
  12   3  -2 91.1643 16.5608   3
  12   3  -2 111.812 11.6880   2
  11  -3  -2 449.078 36.4073   3
 -11  -3   2 429.843 32.0090   1
  11  -3  -2 427.584 24.6744   2
  11  -3  -2 405.268 27.0366   1
  11   3  -2 412.014 22.6877   2
  11   3  -2 402.654 23.8482   2
  11   3  -2 392.667 28.7050   3
 -10  -3   2 73.2020 21.0668   1
  10  -3  -2 103.825 10.6893   2
  10  -3  -2 104.666 23.7966   3
  10  -3  -2 110.418 12.4919   1
  10  -3  -2 118.018 11.8773   2
  10   3  -2 114.993 11.4880   2
  10   3  -2 106.852 10.3609   2
  10   3  -2 113.906 19.7130   1
  10   3  -2 101.817 15.7973   3
   9  -3  -2 69.1715 14.8969   3
   9  -3  -2 75.7631 8.48641   2
  -9  -3   2 59.0954 13.2051   1
   9  -3  -2 82.4311 9.48132   2
   9  -3  -2 92.0991 13.5710   1
   9   3  -2 79.4839 8.52099   2
   9   3  -2 68.1893 11.6465   2
   9   3  -2 67.9266 12.2262   3
   9   3  -2 74.3521 14.7055   1
   8  -3  -2 407.082 21.0191   2
   8  -3  -2 347.900 27.5974   3
   8  -3  -2 437.736 22.4999   2
   8  -3  -2 403.697 22.8229   1
  -8  -3   2 413.039 27.5424   1
   8   3  -2 342.965 22.8061   3
   8   3  -2 366.427 26.3654   1
   8   3  -2 380.679 20.1800   2
  -8   3   2 412.487 22.7671   1
   7  -3  -2 360.146 25.8611   3
  -7  -3   2 304.770 21.9996   1
   7  -3  -2 317.315 18.4481   1
   7  -3  -2 316.559 17.5962   2
   7  -3  -2 331.031 18.3937   2
   7   3  -2 334.292 20.0694   3
  -7   3   2 337.157 18.6004   1
   7   3  -2 301.963 16.8379   2
   7   3  -2 343.241 22.9718   1
  -7   3   2 356.688 25.6365   3
   6  -3  -2 0.80214 1.66606   1
   6  -3  -2 -1.3880 0.92367   3
   6  -3  -2 1.63204 2.09039   2
  -6  -3   2 -0.1120 2.06312   1
  -6  -3   2 2.05533 2.09499   2
   6   3  -2 -0.4327 1.32541   2
  -6   3   2 4.01553 2.83130   3
  -6   3   2 0.70637 1.56049   1
   6   3  -2 -0.3495 1.31623   3
   6   3  -2 0.16080 1.66609   1
   5  -3  -2 54.6521 11.2443   3
   5  -3  -2 50.8850 5.39816   1
   5  -3  -2 43.6025 6.66984   2
  -5  -3   2 55.5640 6.22024   3
  -5  -3   2 75.2223 12.1302   1
  -5  -3   2 45.8991 5.15480   2
  -5   3   2 43.9758 5.04308   1
   5   3  -2 49.2534 5.81449   3
   5   3  -2 53.7240 9.64589   1
   5   3  -2 46.7952 5.18477   2
  -5   3   2 44.0371 6.77646   2
  -5   3   2 58.0014 11.0573   3
  -4  -3   2 2610.89 93.8459   4
   4  -3  -2 2683.45 97.8062   4
  -4  -3   2 2500.30 93.4776   4
   4  -3  -2 2509.56 93.2345   4
   4   3  -2 2772.61 99.5311   4
  -4   3   2 2609.27 92.5490   4
   4   3  -2 2650.49 98.9815   4
  -4   3   2 2553.44 91.1419   4
   3  -3  -2 37.1306 3.16002   1
   3  -3  -2 31.8002 6.28850   3
  -3  -3   2 30.9449 3.40005   3
   3  -3  -2 39.1392 5.45960   2
  -3  -3   2 30.4091 6.33628   1
  -3  -3   2 31.4379 3.78848   2
  -3   3   2 30.9405 6.24806   3
  -3   3   2 35.8622 4.36303   2
   3   3  -2 29.0663 4.01864   3
   3   3  -2 28.7049 6.04287   1
   3   3  -2 34.2619 4.73565   2
  -3   3   2 32.4599 2.93736   1
  -2  -3   2 1114.78 39.6294   1
   2  -3  -2 1034.12 40.4938   3
  -2   3   2 1099.71 40.9088   3
   2   3  -2 1050.58 39.1005   1
  -2   3   2 1115.94 37.6529   2
   1  -3  -2 11.5607 2.90371   2
   1  -3  -2 11.6628 2.06692   1
   1  -3  -2 7.72607 2.64701   3
  -1  -3   2 8.72576 2.76458   1
  -1  -3   2 10.8160 2.77520   2
  -1   3   2 7.82025 2.78246   3
  -1   3   2 7.65124 1.74720   1
  -1   3   2 7.97954 2.24655   2
   1   3  -2 8.42959 2.50386   1
   1   3  -2 8.14928 2.52069   2
   0  -3   2 99.7899 6.97083   2
   0  -3  -2 89.8903 6.55045   2
   0  -3   2 102.130 6.16344   1
   0  -3  -2 106.941 6.53392   3
   0   3  -2 98.8242 6.08005   1
   0   3   2 98.4175 6.32168   3
   0   3   2 97.0931 6.69988   2
   0   3  -2 102.926 7.09481   2
   0   3   2 100.677 6.11212   1
   1  -3   2 240.245 12.8233   2
  -1  -3  -2 236.434 12.2548   1
   1  -3   2 244.550 10.3096   1
   1   3   2 256.384 12.5781   2
   1   3   2 271.372 12.7667   1
  -1   3  -2 241.366 10.4561   1
  -1   3  -2 245.404 12.9484   2
  -2  -3  -2 17.2368 4.20194   1
  -2  -3  -2 21.6979 4.44885   2
   2  -3   2 12.0353 3.87623   3
   2  -3   2 15.5080 3.99266   2
   2  -3   2 14.7856 2.63660   1
   2   3   2 11.4829 2.94059   2
   2   3   2 16.1072 4.23565   1
   3  -3   2 151.716 8.27122   1
   3  -3   2 151.287 10.7163   2
  -3  -3  -2 148.854 11.0573   1
   3  -3   2 140.479 8.07713   1
  -3  -3  -2 141.820 9.92508   2
  -3   3  -2 160.501 11.0402   2
   3   3   2 117.578 9.17507   2
   3   3   2 139.719 10.8184   1
   4  -3   2 171.497 18.4993   3
   4  -3   2 162.379 9.68810   1
   4  -3   2 145.934 11.3477   2
  -4  -3  -2 157.206 11.1680   2
   4  -3   2 151.534 9.43731   1
   4   3   2 153.544 10.0497   3
   4   3   2 153.067 10.9339   2
  -4   3  -2 139.567 11.1502   2
   4   3   2 147.368 12.2511   1
  -5  -3  -2 215.123 14.5092   2
   5  -3   2 242.594 19.1705   3
  -5  -3  -2 229.631 16.6940   1
   5  -3   2 240.062 13.7376   1
   5  -3   2 237.692 15.7911   2
   5  -3   2 247.436 14.0136   1
   5   3   2 233.516 14.8735   2
   5   3   2 239.464 14.5540   3
   5   3   2 251.688 17.2712   1
  -6  -3  -2 70.5439 8.33692   2
   6  -3   2 71.6997 13.4067   3
   6  -3   2 61.4770 9.04247   1
   6  -3   2 62.0590 7.12086   1
   6  -3   2 87.7748 12.3577   2
  -6  -3  -2 91.3247 13.2929   1
   6   3   2 59.4805 9.51194   3
   6   3   2 79.0550 12.9822   1
   6   3   2 71.4725 8.22103   2
  -7  -3  -2 336.669 23.6729   1
   7  -3   2 382.234 22.1652   2
   7  -3   2 323.006 21.5895   2
   7  -3   2 363.164 20.5577   1
   7  -3   2 375.104 21.1806   1
  -7  -3  -2 337.107 20.7714   2
   7  -3   2 421.514 29.0165   3
   7   3   2 357.896 21.0333   2
   7   3   2 321.145 23.3999   1
   7   3   2 321.785 24.0655   3
   8  -3   2 73.5224 11.8486   1
   8  -3   2 78.6113 12.3554   1
   8  -3   2 86.0424 13.9357   2
   8  -3   2 67.8829 11.4550   2
   8  -3   2 86.7912 17.7925   3
   8   3   2 104.752 11.8393   3
   8   3   2 70.6581 12.9787   1
   8   3   2 69.8613 11.2973   2
   9  -3   2 4.22657 3.97819   1
   9  -3   2 2.20448 3.03417   1
   9  -3   2 5.20722 3.65796   2
   9  -3   2 1.81936 3.42222   3
   9  -3   2 5.72931 4.15734   2
   9   3   2 1.18459 3.52915   1
   9   3   2 2.49142 3.16485   3
   9   3   2 2.67610 2.67311   2
  10  -3   2 519.270 38.3501   3
  10  -3   2 416.617 26.9932   2
  10  -3   2 423.883 28.6120   2
  10  -3   2 470.530 29.4645   1
  10  -3   2 446.588 28.4046   1
  10   3   2 476.095 28.0335   2
  10   3   2 518.825 30.5547   2
  10   3   2 467.662 30.3851   3
  10   3   2 480.588 33.7525   1
  11  -3   2 83.2190 20.4064   3
  11  -3   2 54.2704 12.5713   1
  11  -3   2 37.7556 10.8575   1
  11  -3   2 39.9229 10.9080   2
  11  -3   2 56.6756 11.1276   2
  11   3   2 63.9978 12.3622   2
  11   3   2 43.8342 11.8201   3
  11   3   2 46.5253 11.3816   2
  12  -3   2 92.9197 16.8501   2
  12  -3   2 84.2049 14.2535   2
  12  -3   2 97.3117 18.7325   1
  12  -3   2 67.1288 17.4027   3
  12   3   2 94.1614 16.3539   2
  12   3   2 117.928 13.8134   2
  12   3   2 93.7022 17.2334   3
  13  -3   2 2.86464 4.35340   1
  13  -3   2 3.09186 4.38595   2
  13  -3   2 2.69824 4.08080   1
  13   3   2 9.16914 7.12268   3
  13   3   2 9.33221 8.50028   1
  13  -4  -2 11.6368 6.54463   1
  13  -4  -2 23.7456 6.83139   2
  13  -4  -2 4.87679 6.89956   3
  13  -4  -2 12.1254 6.65716   1
  13   4  -2 10.9366 4.43843   2
  13   4  -2 32.7863 10.4026   3
  12  -4  -2 5.52610 3.72681   2
  12  -4  -2 9.45871 4.91850   2
  12  -4  -2 0.01778 4.22683   1
  12  -4  -2 13.3375 9.36102   3
 -12  -4   2 7.68296 7.52404   1
  12  -4  -2 8.51374 6.19934   1
  12   4  -2 4.04243 3.17919   2
  12   4  -2 10.5511 4.77081   2
  12   4  -2 5.92007 5.17391   3
  11  -4  -2 122.524 13.5755   1
  11  -4  -2 122.556 12.3778   2
  11  -4  -2 143.823 15.7020   1
  11  -4  -2 134.325 23.7871   3
 -11  -4   2 161.185 19.3888   1
  11  -4  -2 141.248 13.7532   2
  11   4  -2 160.731 14.1493   2
  11   4  -2 112.661 17.1230   3
  10  -4  -2 101.959 19.1551   3
  10  -4  -2 100.685 19.8872   2
  10  -4  -2 96.2477 11.2117   1
 -10  -4   2 105.086 18.6179   1
  10  -4  -2 93.7708 11.1214   2
  10   4  -2 91.6503 14.2276   3
  10   4  -2 110.286 10.5809   2
  10   4  -2 116.078 11.8878   2
  10   4  -2 120.298 18.9939   1
   9  -4  -2 195.402 14.7966   2
   9  -4  -2 205.430 15.7299   1
  -9  -4   2 222.531 21.0685   1
   9  -4  -2 227.488 23.1910   3
   9  -4  -2 211.942 15.8557   2
   9   4  -2 206.199 16.6006   3
   9   4  -2 238.664 15.4420   2
   9   4  -2 175.502 19.1202   1
   8  -4  -2 265.180 23.9618   3
   8  -4  -2 258.793 17.1432   2
   8  -4  -2 257.186 16.7126   1
  -8  -4   2 274.409 22.6231   1
   8  -4  -2 264.459 16.7883   2
   8   4  -2 222.055 15.2456   2
   8   4  -2 232.918 21.1181   1
   7  -4  -2 56.9923 6.77615   1
   7  -4  -2 87.0818 16.6855   3
  -7  -4   2 56.1526 8.41449   2
  -7  -4   2 33.7444 8.82787   1
   7  -4  -2 68.0307 9.88726   2
   7   4  -2 53.3669 8.70133   3
   7   4  -2 43.2833 10.5020   1
   7   4  -2 44.9959 7.46332   2
  -7   4   2 55.6760 8.27433   1
  -7   4   2 44.2092 10.6784   3
  -6  -4   2 92.6658 11.1048   1
   6  -4  -2 74.8602 14.5402   3
   6  -4  -2 83.4821 8.48053   2
  -6  -4   2 84.9180 7.92710   2
   6  -4  -2 96.0143 7.64677   1
   6   4  -2 107.818 8.67080   2
  -6   4   2 90.3867 8.77667   2
  -6   4   2 80.1891 7.08249   1
  -6   4   2 92.8022 16.0496   3
   6   4  -2 68.4048 7.23216   3
   6   4  -2 98.0042 11.2416   1
   5  -4  -2 69.2947 5.85860   1
   5  -4  -2 96.1087 15.9523   3
  -5  -4   2 76.1183 6.75839   3
  -5  -4   2 64.3712 6.69411   2
  -5  -4   2 60.9196 9.90253   1
   5  -4  -2 74.7374 7.62151   2
   5   4  -2 75.4570 6.55606   3
  -5   4   2 72.9580 7.67870   2
  -5   4   2 87.5261 14.3379   3
   5   4  -2 74.7600 7.04238   2
   5   4  -2 60.7783 9.77663   1
  -5   4   2 78.8737 6.06157   1
   4  -4  -2 1026.60 46.2028   3
   4  -4  -2 1038.87 40.1324   2
   4  -4  -2 1085.14 35.9295   1
  -4  -4   2 1138.85 39.9841   2
  -4  -4   2 1051.73 37.0784   3
  -4  -4   2 1250.18 45.5256   1
  -4   4   2 1040.41 35.5822   1
  -4   4   2 1109.41 46.9720   3
   4   4  -2 1121.40 39.6284   2
   4   4  -2 1084.39 44.0215   1
   4   4  -2 1110.97 37.0013   3
  -4   4   2 1071.18 40.8786   2
   3  -4  -2 716.077 23.1147   1
  -3  -4   2 712.366 27.9337   2
  -3  -4   2 736.276 31.1444   1
   3  -4  -2 695.303 32.6179   3
   3  -4  -2 709.575 28.3652   2
  -3   4   2 737.723 22.9964   1
   3   4  -2 722.452 30.7986   1
  -3   4   2 718.187 32.8144   3
   3   4  -2 700.032 27.7001   2
  -3   4   2 735.922 29.0721   2
   2  -4  -2 223.528 12.2622   2
   2  -4  -2 234.397 14.5362   3
  -2  -4   2 235.575 12.1447   2
  -2  -4   2 234.955 13.4533   1
   2   4  -2 229.350 12.0749   2
  -2   4   2 215.891 14.0450   3
   2   4  -2 213.205 12.9060   1
  -2   4   2 211.474 12.1068   2
   1  -4  -2 333.727 16.1152   2
   1  -4  -2 358.068 17.2962   3
  -1  -4   2 367.976 16.5843   2
  -1  -4   2 366.454 16.5368   1
   1   4  -2 353.074 16.3159   2
  -1   4   2 351.918 13.5984   1
  -1   4   2 368.792 17.4678   3
   1   4  -2 347.476 16.2115   1
  -1   4   2 326.333 16.0267   2
  -1   4   2 354.628 13.2521   1
   0  -4   2 2.33157 2.14476   2
   0  -4   2 4.10378 1.89667   1
   0  -4  -2 6.34831 2.38027   3
   0  -4  -2 3.40558 2.24413   2
   0   4   2 6.05188 2.63780   2
   0   4  -2 5.74581 2.02758   1
   0   4   2 4.44343 2.04333   1
   0   4  -2 4.17852 2.16785   2
   0   4   2 7.67693 2.43349   3
   1  -4   2 24.9380 2.87945   1
  -1  -4  -2 29.8049 5.44080   2
   1  -4   2 29.3552 5.08534   2
  -1  -4  -2 22.3700 4.12882   1
  -1  -4  -2 23.5352 2.78081   3
   1   4   2 37.4176 6.03300   2
   1   4   2 21.3055 2.70211   3
   1   4   2 22.6555 4.41486   1
  -1   4  -2 21.8398 4.62042   2
  -1   4  -2 27.5483 3.05745   1
   2  -4   2 184.421 12.1407   2
  -2  -4  -2 159.685 11.3489   1
  -2  -4  -2 174.153 11.2939   2
   2  -4   2 183.126 8.31406   1
   2   4   2 183.061 11.4991   2
   2   4   2 173.494 11.6871   1
  -2   4  -2 186.273 8.71438   1
   2   4   2 207.056 8.96438   3
  -2   4  -2 166.614 11.7446   2
   3  -4   2 25.2617 5.42526   2
  -3  -4  -2 23.0540 5.16189   1
  -3  -4  -2 45.6647 7.32758   2
   3  -4   2 28.7694 4.00513   1
   3  -4   2 16.6462 5.36185   3
   3   4   2 25.1255 5.55484   2
   3   4   2 27.3732 6.39156   1
  -3   4  -2 18.6272 4.88865   2
  -4  -4  -2 675.433 31.3596   1
   4  -4   2 648.486 29.9110   2
   4  -4   2 672.375 25.0069   1
  -4  -4  -2 688.346 29.3440   2
   4  -4   2 659.931 34.0143   3
   4  -4   2 641.620 24.8643   1
   4   4   2 652.809 31.1509   1
   4   4   2 687.143 25.5220   3
  -4   4  -2 640.704 29.9477   2
   4   4   2 641.173 28.7678   2
  -5  -4  -2 245.541 18.2972   2
   5  -4   2 275.646 21.2491   3
   5  -4   2 254.009 13.8494   1
   5  -4   2 276.379 14.2422   1
   5  -4   2 296.201 18.6051   2
  -5  -4  -2 270.213 18.7937   1
   5   4   2 277.256 16.8655   2
   5   4   2 282.374 14.8388   3
  -5   4  -2 251.197 17.1391   2
   6  -4   2 21.2182 6.71056   2
  -6  -4  -2 18.8032 6.39119   1
   6  -4   2 11.6403 5.27162   3
   6  -4   2 14.4401 4.08090   1
   6  -4   2 15.2852 4.61805   1
  -6  -4  -2 10.6602 4.15076   2
   6   4   2 18.6923 5.46068   2
   6   4   2 17.5256 4.78721   3
   6   4   2 14.3242 5.93294   1
   7  -4   2 20.4534 9.01123   3
  -7  -4  -2 32.1478 7.70627   2
   7  -4   2 19.8449 5.56230   1
   7  -4   2 30.8817 8.10097   2
   7  -4   2 31.0022 6.64664   1
  -7  -4  -2 19.3304 7.00873   1
   7   4   2 16.8202 5.84158   3
   7   4   2 32.2796 7.86121   2
   7   4   2 28.2341 8.61511   1
   8  -4   2 -0.4554 3.27280   3
  -8  -4  -2 -1.5973 2.22198   2
   8  -4   2 2.55338 2.81678   2
   8  -4   2 3.64206 2.89577   1
   8  -4   2 1.72810 2.52143   2
   8  -4   2 0.97849 2.97640   1
  -8  -4  -2 -0.8200 3.28617   1
   8   4   2 6.65751 4.12147   2
   8   4   2 0.07278 3.34261   1
   8   4   2 2.68125 3.25449   3
   9  -4   2 3.49654 3.20588   2
   9  -4   2 1.42090 3.47835   3
   9  -4   2 1.87959 2.52566   1
   9  -4   2 1.09685 3.13834   1
   9  -4   2 9.00080 5.40689   2
   9   4   2 -0.2404 1.79077   3
   9   4   2 -1.3891 1.88531   2
   9   4   2 -1.9455 3.59871   1
  10  -4   2 239.930 19.0809   1
  10  -4   2 212.874 19.7879   2
  10  -4   2 229.187 25.6050   3
  10  -4   2 251.699 19.6350   1
  10  -4   2 247.616 19.8856   2
  10   4   2 225.594 18.7700   2
  10   4   2 224.472 23.1270   1
  10   4   2 214.625 19.3460   3
  11  -4   2 598.180 34.2383   1
  11  -4   2 586.229 44.6917   3
  11  -4   2 615.251 34.4702   1
  11  -4   2 642.384 37.0233   2
  11  -4   2 565.731 33.7169   2
  11   4   2 593.089 35.2417   3
  11   4   2 587.467 33.6811   2
  11   4   2 586.907 35.5872   2
  12  -4   2 73.2693 14.7109   1
  12  -4   2 71.7926 13.1295   2
  12  -4   2 78.6504 14.6318   1
  12  -4   2 82.8837 21.5084   3
  12  -4   2 97.5341 16.5986   2
  12   4   2 63.1246 12.4536   2
  12   4   2 69.6488 13.8446   2
  12   4   2 95.1391 17.0111   3
  13  -4   2 9.66371 5.82501   2
  13  -4   2 17.6591 10.1477   3
  13  -4   2 7.19390 4.36185   1
  13   4   2 5.66584 5.36950   1
  13   4   2 18.5354 8.08806   2
  13  -5  -2 0.49951 2.59037   1
  13  -5  -2 1.99875 5.12855   3
  13  -5  -2 2.47306 2.60994   2
  13   5  -2 2.07137 3.25688   3
  13   5  -2 2.26086 2.76248   2
  12  -5  -2 57.5017 11.1950   1
  12  -5  -2 48.8607 10.6051   1
  12  -5  -2 42.9260 9.35511   2
  12  -5  -2 43.8127 15.4700   3
 -12  -5   2 36.8550 12.0849   1
  12  -5  -2 47.0874 9.14686   2
  12   5  -2 38.1453 8.76779   2
  12   5  -2 31.0933 7.24666   2
  12   5  -2 34.6390 8.98868   3
  11  -5  -2 2.99011 6.58116   3
  11  -5  -2 6.84612 4.54803   2
  11  -5  -2 14.9368 6.30026   1
  11  -5  -2 6.68938 4.27937   2
 -11  -5   2 3.50630 5.23616   1
  11  -5  -2 12.9511 5.73104   1
  11   5  -2 10.8727 4.67519   2
  11   5  -2 1.76255 4.08956   3
  11   5  -2 1.29942 2.80745   2
  10  -5  -2 31.3998 8.15094   2
 -10  -5   2 20.8106 8.63128   1
  10  -5  -2 37.7604 8.49227   1
  10  -5  -2 38.0911 8.64837   1
  10  -5  -2 37.0673 13.4427   3
  10  -5  -2 35.7352 8.32003   2
  10   5  -2 26.8209 9.84331   1
  10   5  -2 26.3712 7.38033   3
   9  -5  -2 9.89819 4.71970   2
   9  -5  -2 13.6316 5.69430   2
  -9  -5   2 8.53993 7.33408   1
   9  -5  -2 5.50443 3.73785   1
   9   5  -2 13.0962 4.92419   3
   9   5  -2 14.0319 5.01846   2
   9   5  -2 13.4675 7.65702   1
   8  -5  -2 128.086 21.2957   3
   8  -5  -2 168.793 12.0040   1
   8  -5  -2 180.205 14.1779   2
  -8  -5   2 156.591 12.6901   2
  -8  -5   2 127.844 18.9314   1
   8   5  -2 126.906 11.4071   2
   8   5  -2 130.433 11.3858   3
   8   5  -2 120.075 19.4167   1
  -7  -5   2 308.786 23.0126   1
   7  -5  -2 320.731 16.0432   1
   7  -5  -2 277.206 18.0891   2
  -7  -5   2 306.383 18.1335   2
   7  -5  -2 314.282 25.6220   3
   7   5  -2 318.510 23.2239   1
   7   5  -2 275.094 17.0558   2
  -7   5   2 297.662 18.8657   2
  -7   5   2 300.683 24.8351   3
   7   5  -2 288.051 16.3778   3
   6  -5  -2 2.78661 2.45559   2
  -6  -5   2 6.80322 3.29243   2
  -6  -5   2 4.71423 3.50481   1
   6  -5  -2 2.20945 3.60138   3
   6  -5  -2 4.47621 2.08334   1
   6   5  -2 -1.6528 1.17325   1
   6   5  -2 6.59191 3.06747   2
   6   5  -2 3.23586 2.18902   3
  -6   5   2 4.37258 3.56825   3
  -6   5   2 5.93278 3.13188   2
  -5  -5   2 1176.33 49.0744   1
   5  -5  -2 1137.79 51.8316   3
  -5  -5   2 1143.43 43.2676   2
   5  -5  -2 1182.59 44.5865   2
   5  -5  -2 1124.94 37.8162   1
  -5   5   2 1142.43 44.9028   2
   5   5  -2 1162.75 43.1577   2
   5   5  -2 1113.93 38.7678   3
  -5   5   2 1096.90 50.9163   3
   5   5  -2 1168.83 48.7105   1
  -4  -5   2 2178.38 77.6716   1
   4  -5  -2 2101.69 80.4491   3
  -4  -5   2 2131.88 68.0816   3
   4  -5  -2 2177.39 73.8834   2
  -4   5   2 2205.48 80.8435   3
   4   5  -2 2172.19 77.3954   1
  -3  -5   2 838.723 35.5302   1
   3  -5  -2 840.563 33.5127   2
   3  -5  -2 766.548 36.7950   3
  -3  -5   2 785.586 32.3927   2
  -3   5   2 818.201 37.3522   3
  -3   5   2 881.691 34.2376   2
   3   5  -2 860.049 32.9359   2
   3   5  -2 882.124 35.7467   1
   2  -5  -2 11.8828 3.51282   2
  -2  -5   2 11.3243 3.92448   1
   2  -5  -2 12.6691 4.45318   3
  -2  -5   2 10.9151 3.32374   2
   2   5  -2 11.5885 3.66122   1
  -2   5   2 17.7282 5.24207   3
  -2   5   2 11.8135 3.54369   2
   2   5  -2 18.7056 4.56137   2
   1  -5  -2 13.7451 4.10610   3
  -1  -5   2 16.7370 4.12796   2
   1  -5  -2 23.1381 5.15994   2
  -1  -5   2 22.6631 4.78683   1
   1   5  -2 13.7205 3.58442   1
  -1   5   2 21.7666 3.41433   1
   1   5  -2 19.8253 4.77022   2
  -1   5   2 20.2290 3.12398   1
  -1   5   2 22.5834 5.09883   2
  -1   5   2 16.8146 4.26301   3
   0  -5   2 3644.08 132.913   4
   0  -5  -2 3862.49 133.583   4
   0  -5   2 3638.65 133.150   4
   0  -5  -2 3693.96 131.925   4
   0   5   2 3643.84 132.468   4
   0   5  -2 3722.81 132.873   4
   0   5   2 3783.23 131.962   4
   0   5  -2 3786.10 132.978   4
  -1  -5  -2 213.708 12.5905   1
   1  -5   2 224.978 13.8178   2
   1  -5   2 211.031 10.2167   1
  -1  -5  -2 224.593 10.6049   3
  -1  -5  -2 221.950 13.3551   2
   1  -5   2 206.481 13.8415   3
  -1   5  -2 215.381 13.6990   2
   1   5   2 230.116 12.8269   1
  -1   5  -2 212.713 10.3370   1
   1   5   2 224.658 10.5972   3
   1   5   2 230.244 13.4621   2
  -2  -5  -2 740.289 30.2948   1
   2  -5   2 704.437 30.5057   2
   2  -5   2 700.211 32.3153   3
  -2  -5  -2 713.222 29.8767   2
   2  -5   2 684.505 23.8947   1
  -2   5  -2 697.105 24.4270   1
   2   5   2 666.936 29.4988   1
   2   5   2 693.155 24.5499   3
   2   5   2 709.353 29.4973   2
  -2   5  -2 691.138 30.4761   2
   3  -5   2 3562.44 125.607   4
   3  -5   2 3499.90 122.531   4
  -3  -5  -2 3378.08 122.138   4
  -3  -5  -2 3152.67 121.878   4
   3   5   2 3434.75 125.377   4
  -3   5  -2 3373.88 119.249   4
   3   5   2 3571.84 124.860   4
  -3   5  -2 3471.50 120.192   4
   4  -5   2 86.3433 5.96262   1
  -4  -5  -2 84.6930 9.07728   2
   4  -5   2 94.2907 6.12691   1
  -4  -5  -2 109.514 15.1427   1
   4  -5   2 109.974 16.5735   3
   4   5   2 78.8049 5.59036   3
   4   5   2 84.1896 11.8030   1
  -4   5  -2 82.8914 9.39106   2
   4   5   2 75.9646 8.50945   2
   5  -5   2 111.888 17.3095   3
   5  -5   2 106.745 7.35575   1
  -5  -5  -2 106.054 10.3452   2
  -5  -5  -2 85.5739 12.7504   1
   5  -5   2 84.6292 6.79315   1
   5  -5   2 94.3822 10.3387   2
   5   5   2 93.4669 11.0851   1
   5   5   2 100.129 7.26121   3
   5   5   2 94.7838 9.77511   2
  -5   5  -2 98.3374 10.5970   2
  -6  -5  -2 17.9757 6.20687   1
   6  -5   2 23.7984 5.06133   1
   6  -5   2 20.9780 4.65064   1
  -6  -5  -2 18.5207 5.73577   2
   6  -5   2 20.3162 6.29781   2
   6  -5   2 24.8268 9.16824   3
   6   5   2 11.5436 4.86965   2
   6   5   2 21.3646 4.77589   3
  -6   5  -2 36.2021 8.43443   2
   6   5   2 25.1920 7.04307   1
  -7  -5  -2 62.2151 11.4018   2
   7  -5   2 45.5400 7.71075   1
   7  -5   2 26.2729 9.63211   3
   7  -5   2 46.9958 10.2011   2
  -7  -5  -2 51.9854 11.9935   1
   7  -5   2 56.3209 8.62515   1
   7   5   2 43.7540 7.76182   3
   7   5   2 42.0153 10.6868   1
   7   5   2 32.8103 8.31629   2
  -8  -5  -2 -1.2731 3.07193   1
   8  -5   2 5.20341 5.59780   3
  -8  -5  -2 -3.2408 1.49741   2
   8  -5   2 0.54658 2.17237   1
   8  -5   2 0.42392 2.23589   2
   8   5   2 -1.3112 2.66660   1
   8   5   2 -5.0882 1.48186   3
   8   5   2 -1.8263 1.53320   2
   9  -5   2 7.27400 4.18017   1
   9  -5   2 7.89258 6.09063   3
   9  -5   2 2.95292 2.80446   2
   9  -5   2 14.9364 6.41676   2
   9  -5   2 12.9172 4.84739   1
   9   5   2 11.9399 4.99578   3
   9   5   2 10.2854 5.08610   1
   9   5   2 15.6364 6.30049   2
  10  -5   2 268.609 21.8692   2
  10  -5   2 335.603 24.9037   2
  10  -5   2 303.557 20.5611   1
  10  -5   2 288.972 29.7591   3
  10  -5   2 333.734 21.4373   1
  10   5   2 294.283 21.1234   3
  10   5   2 279.297 21.4905   2
  11  -5   2 302.508 24.7012   2
  11  -5   2 288.816 21.2734   1
  11  -5   2 303.438 23.3747   2
  11  -5   2 338.777 33.6913   3
  11  -5   2 339.209 22.3974   1
  11   5   2 273.359 21.8471   2
  11   5   2 287.147 24.0824   2
  11   5   2 275.667 21.7682   3
  12  -5   2 5.62085 4.17438   1
  12  -5   2 11.5732 7.95240   3
  12  -5   2 10.0848 5.27637   1
  12   5   2 5.46661 5.49297   2
  12   5   2 6.77447 4.48748   3
  12   5   2 7.56212 5.31878   2
  13  -5   2 5.14975 4.19388   1
  13  -5   2 5.76572 6.54339   3
  13  -5   2 1.00660 2.69514   2
  13   5   2 -0.3551 2.86355   2
  13   5   2 0.50006 3.05336   3
  13  -6  -2 10.8704 8.79482   3
  13  -6  -2 17.8168 6.24137   1
  13  -6  -2 15.6015 6.02668   2
  13   6  -2 22.2069 7.15343   2
  13   6  -2 18.1196 6.35948   3
  12  -6  -2 3.10759 2.91430   2
  12  -6  -2 0.28161 2.24614   1
  12  -6  -2 8.04677 4.38569   2
  12  -6  -2 8.29576 6.80487   3
  12  -6  -2 2.81247 3.11102   1
 -12  -6   2 1.18065 5.11058   1
  12   6  -2 8.35295 5.24427   2
  12   6  -2 3.06015 3.13385   3
  12   6  -2 3.59074 3.69850   2
  11  -6  -2 6.31044 5.31570   2
  11  -6  -2 7.17332 4.26846   2
  11  -6  -2 1.23651 2.15583   1
 -11  -6   2 0.41948 3.44001   1
  11  -6  -2 3.08726 3.18207   1
  11  -6  -2 6.48211 7.56008   3
  11   6  -2 -2.4116 2.11987   2
  11   6  -2 0.31990 2.86549   3
  10  -6  -2 4.26989 4.11931   2
 -10  -6   2 4.21731 4.69167   1
  10  -6  -2 4.56275 4.11196   2
  10  -6  -2 -1.8857 3.62379   3
  10  -6  -2 1.46795 3.00987   1
  10  -6  -2 8.36037 4.08026   1
  10   6  -2 1.12558 3.20304   3
  10   6  -2 6.14198 3.80301   2
   9  -6  -2 17.7272 5.16676   1
   9  -6  -2 12.7886 5.17462   2
   9  -6  -2 12.7724 6.83409   3
  -9  -6   2 13.2479 7.20125   1
  -9  -6   2 28.1923 7.66850   2
   9  -6  -2 27.3283 5.75762   1
   9   6  -2 16.2445 7.64879   1
   9   6  -2 13.4867 4.34195   3
   8  -6  -2 179.049 11.7766   1
   8  -6  -2 170.308 20.3799   3
  -8  -6   2 195.145 19.5508   1
  -8  -6   2 180.875 14.5010   2
   8  -6  -2 192.768 11.7538   1
   8  -6  -2 177.222 15.0055   2
   8   6  -2 181.285 14.1449   2
   8   6  -2 188.720 12.3554   3
   8   6  -2 203.780 19.6958   1
  -7  -6   2 250.027 16.9589   2
   7  -6  -2 252.641 13.2173   1
   7  -6  -2 279.424 13.3123   1
  -7  -6   2 258.310 21.6629   1
   7  -6  -2 269.560 24.5912   3
   7  -6  -2 271.076 18.2479   2
  -7   6   2 254.151 18.3438   2
  -7   6   2 273.728 24.0906   3
   7   6  -2 240.889 20.7841   1
   7   6  -2 304.549 17.9781   2
   7   6  -2 242.514 13.5331   3
  -6  -6   2 107.017 12.7693   1
   6  -6  -2 84.1083 9.61569   2
   6  -6  -2 103.053 6.28662   1
   6  -6  -2 109.416 6.37090   1
   6  -6  -2 120.334 19.4298   3
  -6   6   2 119.265 19.5992   3
   6   6  -2 96.9770 14.5619   1
   6   6  -2 101.254 9.75309   2
  -6   6   2 107.083 10.9271   2
  -5  -6   2 191.961 13.6772   2
  -5  -6   2 182.086 16.0213   1
   5  -6  -2 194.363 18.2285   3
  -5   6   2 202.485 18.2452   3
   5   6  -2 205.237 16.6401   1
   5   6  -2 209.482 14.0230   2
  -5   6   2 215.140 15.3713   2
   4  -6  -2 882.680 42.6272   3
   4  -6  -2 900.463 37.3170   2
  -4  -6   2 892.489 36.5612   2
   4   6  -2 861.977 36.0288   2
  -4   6   2 877.380 37.6251   2
  -4   6   2 919.359 42.8744   3
   4   6  -2 913.625 39.9024   1
  -3  -6   2 1019.75 41.9370   1
   3  -6  -2 1021.96 40.4145   2
  -3  -6   2 997.972 39.6384   2
   3  -6  -2 1045.94 44.8216   3
   3   6  -2 999.041 39.5144   2
   3   6  -2 1021.36 41.7556   1
  -3   6   2 990.539 40.5054   2
  -3   6   2 1014.72 44.3097   3
   2  -6  -2 122.102 10.0762   2
  -2  -6   2 102.667 9.48329   1
  -2  -6   2 127.825 9.99548   2
   2  -6  -2 116.939 10.9230   3
  -2   6   2 118.070 9.90685   2
  -2   6   2 114.183 5.36774   1
   2   6  -2 89.7472 8.69975   2
   2   6  -2 108.720 9.55118   1
  -2   6   2 109.786 5.49969   1
  -2   6   2 101.701 10.2651   3
  -1   6   2 1940.27 66.8456   3
  -1   6   2 1858.26 66.1244   2
   0  -6   2 1559.57 55.9884   2
   0   6  -2 1497.59 55.4193   2
   1  -6   2 1560.61 57.3909   2
  -1   6  -2 1619.55 57.8008   2
   1   6   2 1518.95 54.7164   1
   1   6   2 1558.61 56.5683   2
  -2  -6  -2 653.386 30.3095   2
   2  -6   2 709.766 24.4462   1
  -2  -6  -2 701.380 30.7265   1
   2  -6   2 683.185 33.0453   3
   2  -6   2 726.734 31.9043   2
   2   6   2 712.253 30.6453   1
   2   6   2 684.292 24.5988   3
  -2   6  -2 762.689 32.5931   2
   2   6   2 673.497 30.2775   2
  -2   6  -2 689.648 24.8196   1
   3  -6   2 1086.49 35.1162   1
   3  -6   2 1145.77 46.6407   2
  -3  -6  -2 1055.71 44.3218   1
   3  -6   2 1111.75 48.3318   3
   3   6   2 1081.11 43.2358   2
   3   6   2 1076.05 44.2914   1
  -3   6  -2 1085.88 35.5301   1
  -3   6  -2 1084.38 44.9741   2
   4  -6   2 1501.79 57.1871   2
  -4  -6  -2 1356.52 56.7493   1
   4  -6   2 1562.69 62.9829   3
   4  -6   2 1435.77 46.2518   1
  -4  -6  -2 1425.63 55.2443   2
   4   6   2 1362.67 54.6299   2
  -4   6  -2 1535.64 57.7912   2
   5  -6   2 81.0141 5.81731   1
  -5  -6  -2 80.8072 12.8178   1
   5  -6   2 84.3267 14.4072   3
   5  -6   2 90.9829 6.05357   1
   5  -6   2 84.7862 10.2335   2
  -5  -6  -2 96.5593 10.2301   2
   5   6   2 84.0566 5.44203   3
  -5   6  -2 91.9904 13.7401   2
   5   6   2 71.0451 11.8800   1
   5   6   2 80.3657 9.39023   2
   6  -6   2 105.307 7.81518   1
   6  -6   2 114.383 19.5687   3
   6  -6   2 103.580 7.72409   1
  -6  -6  -2 110.940 13.5141   1
  -6  -6  -2 123.830 12.2402   2
   6  -6   2 117.911 12.6795   2
  -6   6  -2 123.078 12.9554   2
   6   6   2 130.060 14.2893   1
   6   6   2 124.186 13.9395   2
   6   6   2 138.961 8.42482   3
  -7  -6  -2 101.861 11.8133   2
   7  -6   2 102.283 8.43582   1
   7  -6   2 98.6059 14.4949   2
  -7  -6  -2 109.267 17.5941   1
   7  -6   2 82.0976 16.3877   3
   7  -6   2 92.0248 8.16533   1
   7   6   2 93.0661 11.1984   2
   7   6   2 112.729 8.82347   3
  -7   6  -2 89.1530 15.0054   2
   7   6   2 139.367 21.2663   1
   8  -6   2 182.199 16.8651   2
   8  -6   2 155.474 25.5278   3
  -8  -6  -2 165.406 18.1904   1
  -8  -6  -2 142.583 14.7007   2
   8  -6   2 163.498 11.8185   1
   8  -6   2 164.599 11.8561   1
   8   6   2 145.137 14.4388   2
   8   6   2 172.403 12.2510   3
   8   6   2 172.198 18.5270   1
  -9  -6  -2 14.5330 6.72853   2
   9  -6   2 12.6221 4.32590   1
   9  -6   2 21.7146 9.54969   3
   9  -6   2 10.1163 6.23833   2
   9  -6   2 12.1877 5.90404   2
   9  -6   2 13.4794 4.90307   1
   9   6   2 3.83952 3.58531   2
   9   6   2 9.76929 4.16337   3
   9   6   2 14.8088 7.75399   1
  10  -6   2 82.0047 9.44768   1
  10  -6   2 79.6401 9.34856   1
  10  -6   2 74.7780 18.1655   3
  10  -6   2 62.4669 13.5338   2
  10  -6   2 74.0557 13.7137   2
  10   6   2 68.6965 11.2053   3
  10   6   2 58.6250 11.3842   2
  11  -6   2 33.0152 8.14390   1
  11  -6   2 37.8542 14.1597   3
  11  -6   2 39.4524 11.1550   2
  11  -6   2 37.1207 10.2975   2
  11  -6   2 47.1014 9.09646   1
  11   6   2 35.6930 7.97882   3
  11   6   2 45.1197 10.1697   2
  12  -6   2 16.6028 5.71452   1
  12  -6   2 11.5643 5.58305   1
  12  -6   2 11.5252 6.31041   2
  12  -6   2 10.5470 5.90884   2
  12  -6   2 11.3920 11.5818   3
  12   6   2 7.27830 5.70460   2
  12   6   2 24.2318 7.35277   3
  12   6   2 21.5802 9.71038   2
  13  -6   2 3.22278 3.90976   2
  13  -6   2 5.10619 3.94416   1
  13   6   2 15.5686 7.57561   2
  13   6   2 -0.2220 3.16419   3
  13  -7  -2 1.65485 3.31389   2
  13   7  -2 1.08692 3.20564   2
 -12  -7   2 60.3137 16.9305   1
  12  -7  -2 33.7537 9.34299   2
  12  -7  -2 36.5358 7.70120   1
  12  -7  -2 43.8693 10.1695   2
  12  -7  -2 22.8310 11.4620   3
  12  -7  -2 40.7620 7.60142   1
  12   7  -2 36.5127 8.85165   2
  12   7  -2 32.3916 8.74043   2
  11  -7  -2 27.2693 7.97051   2
  11  -7  -2 16.1311 10.8425   3
  11  -7  -2 15.7290 5.31912   1
 -11  -7   2 46.1830 14.7462   1
  11  -7  -2 18.0275 6.30891   2
  11  -7  -2 27.8952 6.04128   1
  11   7  -2 26.7440 7.69993   2
  10  -7  -2 0.02005 1.69052   1
 -10  -7   2 0.27053 4.00433   1
 -10  -7   2 1.55470 2.93393   2
  10  -7  -2 -4.0098 1.88575   3
  10  -7  -2 1.55431 3.58682   2
  10  -7  -2 6.71912 3.08993   1
  10   7  -2 2.11894 2.51528   2
   9  -7  -2 17.3415 6.00974   2
   9  -7  -2 22.3553 4.41522   1
  -9  -7   2 14.3019 7.46636   1
   9  -7  -2 20.0944 4.45903   1
  -9  -7   2 35.7386 8.54036   2
   9  -7  -2 13.5331 7.51050   3
   9   7  -2 18.7990 5.90969   2
   9   7  -2 27.0721 9.56887   1
  -8  -7   2 228.716 22.0401   1
   8  -7  -2 226.705 17.6863   2
   8  -7  -2 223.672 11.1157   1
  -8  -7   2 244.597 17.6217   2
   8  -7  -2 184.401 23.2994   3
   8  -7  -2 204.196 10.7916   1
   8   7  -2 239.384 17.3021   2
  -8   7   2 257.505 19.3616   2
   7  -7  -2 674.233 32.9863   2
   7  -7  -2 688.522 42.0806   3
  -7  -7   2 656.717 37.7296   1
  -7  -7   2 613.023 31.0979   2
  -7   7   2 641.872 33.7618   2
   7   7  -2 602.782 36.2846   1
   7   7  -2 629.963 31.0826   2
   6  -7  -2 182.242 19.2333   3
  -6  -7   2 125.568 14.8816   1
  -6  -7   2 196.975 14.6991   2
   6  -7  -2 134.248 13.0845   2
  -6   7   2 208.384 19.9806   3
   6   7  -2 179.463 13.9735   2
   6   7  -2 158.887 15.9950   1
  -6   7   2 158.691 14.4483   2
   5  -7  -2 7.03528 3.83955   2
  -5  -7   2 4.24531 3.99571   1
   5  -7  -2 -1.2402 1.25278   3
  -5  -7   2 0.76048 2.14781   2
   5   7  -2 13.8478 5.10096   2
  -5   7   2 5.73986 3.61794   2
   5   7  -2 0.29786 2.64523   1
  -5   7   2 -0.7820 1.45182   3
   4  -7  -2 747.466 34.0436   2
   4  -7  -2 747.638 38.9160   3
  -4  -7   2 722.521 35.9353   1
  -4  -7   2 754.329 36.6676   2
   4   7  -2 773.285 33.3662   2
  -4   7   2 758.917 38.7810   3
   4   7  -2 751.695 35.8804   1
  -4   7   2 735.018 34.4235   2
  -3  -7   2 142.150 12.4940   1
   3  -7  -2 136.531 13.6509   3
  -3  -7   2 154.509 13.9636   2
   3  -7  -2 154.801 12.7594   2
  -3   7   2 132.115 13.3757   3
   3   7  -2 138.734 11.4323   2
  -3   7   2 137.711 12.0554   2
   3   7  -2 138.112 12.2255   1
  -2  -7   2 22.7857 3.67367   3
  -2  -7   2 19.9823 5.11388   1
  -2  -7   2 18.1329 5.36954   2
   2  -7  -2 22.2333 6.73845   3
  -2   7   2 25.7139 3.45707   1
   2   7  -2 20.3191 5.69433   2
   2   7  -2 26.6531 6.63274   1
  -2   7   2 21.2014 5.34095   2
  -2   7   2 31.5714 7.74903   3
  -2   7   2 19.2050 2.31480   1
   1  -7  -2 480.139 27.3233   2
  -1  -7   2 576.324 23.4100   3
  -1  -7   2 567.114 26.8717   2
   1  -7  -2 542.061 26.2366   3
  -1  -7   2 531.882 24.7475   1
   1   7  -2 562.642 24.9985   1
   1   7  -2 555.519 26.4917   2
  -1   7   2 542.000 21.2420   1
  -1   7   2 535.263 26.2857   3
  -1   7   2 546.691 26.3804   2
   0  -7   2 1984.56 74.7599   2
   0   7  -2 1967.30 70.4521   2
   0   7   2 1965.55 70.1424   2
   1  -7   2 806.809 29.3763   1
   1  -7   2 758.728 38.0396   2
   1  -7   2 774.598 34.9709   3
  -1  -7  -2 790.683 29.8173   3
  -1  -7  -2 801.520 32.9450   1
  -1  -7  -2 755.489 37.2389   2
   1   7   2 812.919 34.7865   2
   1   7   2 829.096 32.8182   1
   1   7   2 782.017 29.9938   3
  -1   7  -2 791.516 29.3538   1
  -1   7  -2 777.208 34.9782   2
   2  -7   2 413.321 15.6088   1
  -2  -7  -2 392.338 21.7303   2
   2  -7   2 351.825 21.4778   2
  -2   7  -2 397.117 22.5857   2
  -2   7  -2 371.170 15.7063   1
   2   7   2 386.127 15.3217   3
   2   7   2 362.420 20.5089   1
   2   7   2 368.094 21.0611   2
  -3  -7  -2 1829.08 68.0242   2
   3  -7   2 1783.71 68.7912   2
   3  -7   2 2010.68 74.4068   3
  -3  -7  -2 1832.64 68.7909   1
   3   7   2 1877.58 68.9158   1
   3   7   2 1822.58 67.6232   2
  -3   7  -2 1859.39 69.8308   2
  -4  -7  -2 17.4650 5.74419   1
  -4  -7  -2 21.1397 6.13389   2
   4  -7   2 25.0513 8.06535   3
   4  -7   2 26.2079 7.31506   2
   4   7   2 23.2918 6.32610   1
   4   7   2 22.6032 5.77114   2
  -4   7  -2 27.3086 7.87395   2
  -5  -7  -2 11.3912 4.69124   2
  -5  -7  -2 7.58844 4.42797   1
   5  -7   2 7.05339 4.67331   3
   5  -7   2 11.9887 5.49545   2
   5   7   2 7.80454 3.87852   2
   5   7   2 4.46617 3.47439   1
  -5   7  -2 5.40315 3.46697   2
  -6  -7  -2 155.707 16.1593   1
   6  -7   2 119.272 13.2126   2
  -6  -7  -2 115.722 12.4426   2
   6  -7   2 106.909 6.89320   1
   6  -7   2 115.345 7.11982   1
   6  -7   2 104.947 19.3585   3
   6   7   2 125.878 14.5990   1
   6   7   2 121.805 12.4949   2
  -6   7  -2 122.591 13.6588   2
   7  -7   2 569.365 23.0189   1
  -7  -7  -2 571.483 31.7357   2
  -7  -7  -2 609.715 36.1958   1
   7  -7   2 598.013 33.3753   2
   7  -7   2 534.373 38.3323   3
   7  -7   2 549.578 22.7416   1
  -7   7  -2 577.739 33.3932   2
   7   7   2 611.824 21.9078   3
   7   7   2 564.841 35.3333   1
   7   7   2 561.581 31.1595   2
   8  -7   2 18.2040 9.25886   3
   8  -7   2 16.1290 7.20414   2
   8  -7   2 26.0551 5.23506   1
  -8  -7  -2 31.3010 8.42827   2
   8  -7   2 25.2918 5.08990   1
  -8  -7  -2 12.7682 7.01173   1
   8   7   2 30.3450 5.10041   3
   8   7   2 24.8438 7.40761   2
   8   7   2 28.4021 9.70584   1
  -9  -7  -2 41.6941 10.7911   2
   9  -7   2 49.7719 11.8464   2
   9  -7   2 63.7985 16.7929   3
   9  -7   2 53.1799 8.05754   1
   9  -7   2 51.9032 7.91282   1
   9   7   2 28.3360 14.7669   1
   9   7   2 33.4823 8.98988   2
   9   7   2 49.5618 5.88468   3
  10  -7   2 23.2679 12.3621   3
  10  -7   2 24.1182 5.84843   1
  10  -7   2 25.8760 9.38339   2
 -10  -7  -2 20.4139 7.60779   2
  10  -7   2 19.4469 7.81621   2
  10   7   2 19.1815 5.29536   3
  10   7   2 22.7504 7.49023   2
  11  -7   2 47.1661 8.48979   1
  11  -7   2 30.0701 7.08946   1
  11  -7   2 39.6465 11.4476   2
  11  -7   2 44.9456 13.5750   2
  11  -7   2 33.5939 14.5180   3
  11   7   2 20.4345 7.21304   2
  11   7   2 19.1702 6.33384   3
  12  -7   2 5.35097 6.61693   3
  12  -7   2 6.81920 5.25941   2
  12  -7   2 2.78710 3.30613   2
  12  -7   2 4.82591 2.99181   1
  12   7   2 8.29685 5.46503   3
  12   7   2 10.0801 6.00527   2
  13  -7   2 55.1918 14.0355   2
  13   7   2 56.0528 13.3148   2
  13  -8  -2 14.8036 6.76658   2
  13   8  -2 18.5830 9.69737   2
  12  -8  -2 3.45912 4.51787   2
 -12  -8   2 5.17402 6.19701   1
  12  -8  -2 10.8426 8.84120   3
  12  -8  -2 7.55481 4.76278   2
  12   8  -2 2.17589 3.43630   2
 -11  -8   2 184.087 28.7802   1
  11  -8  -2 161.181 30.1668   3
  11  -8  -2 191.376 18.2234   2
  11  -8  -2 179.316 17.2794   2
  11   8  -2 210.407 17.7345   2
 -10  -8   2 76.0682 12.7949   2
  10  -8  -2 40.8661 14.3919   3
 -10  -8   2 66.1365 16.2705   1
  10  -8  -2 50.7186 11.4337   2
  10   8  -2 82.1940 13.1776   2
  -9  -8   2 95.8729 14.1408   2
  -9  -8   2 84.4394 16.0738   1
   9  -8  -2 141.368 26.1018   3
   9  -8  -2 100.724 15.1433   2
   9   8  -2 104.749 11.8191   2
   8  -8  -2 9.21064 6.42205   3
   8  -8  -2 3.51914 3.74376   2
  -8  -8   2 2.04868 3.72367   2
  -8  -8   2 1.52834 4.19157   1
  -8   8   2 2.43059 3.65091   2
   8   8  -2 7.81743 4.19973   2
   7  -8  -2 916.876 51.4652   3
   7  -8  -2 908.860 41.9443   2
  -7  -8   2 979.083 48.5203   1
  -7  -8   2 928.237 41.1371   2
  -7   8   2 887.942 42.8763   2
   7   8  -2 653.050 44.4783   1
   7   8  -2 899.958 40.4814   2
   6  -8  -2 470.374 26.9382   2
   6  -8  -2 502.253 33.9675   3
  -6  -8   2 407.766 24.8052   2
  -6  -8   2 480.789 30.5472   1
   6   8  -2 476.926 29.9424   1
  -6   8   2 434.641 26.8410   2
  -6   8   2 464.530 32.4347   3
   5  -8  -2 7.46270 4.12136   2
  -5  -8   2 -3.1564 2.45058   1
   5  -8  -2 0.56180 2.50497   3
  -5  -8   2 -0.4474 1.51956   2
   5   8  -2 -1.4615 2.85771   1
  -5   8   2 6.79793 5.24167   3
   5   8  -2 4.94601 3.59136   2
  -4  -8   2 52.8871 11.4660   1
   4  -8  -2 53.9606 9.61075   2
   4  -8  -2 60.9293 13.1927   3
  -4  -8   2 51.5753 9.43701   2
  -4   8   2 34.9940 8.78072   3
   4   8  -2 58.6996 10.0923   2
   4   8  -2 42.3066 8.94852   1
  -4   8   2 62.8346 11.2335   2
   3  -8  -2 5.96769 4.05875   3
  -3  -8   2 13.9850 5.24524   2
  -3  -8   2 9.68725 4.28244   1
   3  -8  -2 8.86961 4.23114   2
   3   8  -2 18.4992 6.08252   1
  -3   8   2 18.9981 6.08149   2
   3   8  -2 6.83710 3.82059   2
  -3   8   2 14.9030 5.71297   3
  -2  -8   2 73.5957 5.92146   3
   2  -8  -2 82.0905 9.59078   2
   2  -8  -2 78.4526 9.89844   3
  -2  -8   2 83.6392 9.15689   1
  -2  -8   2 88.3910 9.62460   2
  -2   8   2 83.6783 9.56744   2
   2   8  -2 85.0940 9.08781   1
  -2   8   2 80.4093 12.4745   3
  -2   8   2 80.9275 5.23379   1
  -2   8   2 83.9690 5.75618   1
   2   8  -2 77.6597 9.09285   2
   1  -8  -2 55.9296 9.21891   2
  -1  -8   2 87.0332 8.69683   1
  -1  -8   2 90.0634 7.89864   3
   1  -8  -2 70.0795 8.67114   3
  -1  -8   2 80.8341 9.49504   2
   1   8  -2 93.5851 8.88991   1
  -1   8   2 77.8132 8.99402   3
   1   8  -2 86.1260 9.49054   2
  -1   8   2 90.0418 6.80178   1
  -1   8   2 86.3179 12.3451   2
   0  -8  -2 1353.52 53.4526   2
   0  -8   2 1359.71 54.1230   2
   0  -8   2 1364.10 51.8042   3
   0  -8   2 1369.62 49.3925   1
   0  -8  -2 1351.94 49.4488   1
   0  -8  -2 1399.43 50.8980   3
   0   8   2 1337.39 50.7590   3
   0   8  -2 1329.05 53.6058   2
   0   8   2 1443.03 54.2621   2
   0   8   2 1377.79 48.9942   1
   0   8  -2 1393.62 49.3566   1
   1  -8   2 14.3037 3.66598   1
   1  -8   2 9.92489 4.48800   3
   1  -8   2 17.6137 6.29265   2
  -1  -8  -2 4.61640 3.08793   2
  -1  -8  -2 9.29720 3.21211   3
  -1  -8  -2 15.3179 5.01474   1
  -1   8  -2 11.1826 4.84943   2
   1   8   2 8.26062 3.64155   1
   1   8   2 9.76138 3.98214   2
   1   8   2 13.6193 3.97172   3
  -1   8  -2 11.7064 3.37245   1
   2  -8   2 396.209 24.3319   3
   2  -8   2 387.290 22.9961   2
   2  -8   2 373.377 15.6345   1
  -2  -8  -2 369.260 22.0685   2
  -2  -8  -2 350.004 20.9632   1
  -2   8  -2 371.294 15.9813   1
   2   8   2 392.535 21.6427   1
  -2   8  -2 372.648 22.8745   2
   2   8   2 373.585 15.8634   3
   2   8   2 359.743 21.7900   2
  -3  -8  -2 154.934 13.9378   1
   3  -8   2 173.189 7.53579   1
  -3  -8  -2 164.044 14.0859   2
   3  -8   2 155.517 14.2250   2
   3  -8   2 174.058 16.5386   3
  -3   8  -2 154.021 7.94447   1
  -3   8  -2 179.992 18.0892   2
   4  -8   2 152.558 16.4194   3
  -4  -8  -2 139.578 13.1725   2
   4  -8   2 157.007 14.3884   2
  -4  -8  -2 98.7072 12.1646   1
   4   8   2 153.281 14.4504   1
  -4   8  -2 142.762 14.0297   2
   4   8   2 134.166 12.7750   2
  -5  -8  -2 54.1197 11.2168   2
   5  -8   2 38.0955 9.16887   2
  -5  -8  -2 51.9753 11.9760   1
   5  -8   2 47.6505 12.7139   3
   5   8   2 32.4453 8.21886   1
   5   8   2 31.3179 8.63727   2
  -5   8  -2 50.6555 10.0047   2
  -6  -8  -2 221.222 20.3053   1
   6  -8   2 207.499 18.3825   2
   6  -8   2 226.180 22.8631   3
  -6  -8  -2 222.032 18.1109   2
   6   8   2 253.021 18.6074   2
  -6   8  -2 231.534 19.6532   2
   6   8   2 195.915 19.0813   1
  -7  -8  -2 320.009 25.7612   1
  -7  -8  -2 306.844 22.3813   2
   7  -8   2 279.048 27.1210   3
   7  -8   2 303.862 23.1533   2
  -7   8  -2 278.570 22.9051   2
   7   8   2 328.322 22.4846   2
   8  -8   2 29.8379 9.02821   2
   8  -8   2 25.1323 3.90619   1
  -8  -8  -2 18.7561 7.38090   2
   8  -8   2 23.1283 11.6195   3
  -8  -8  -2 28.1453 10.0118   1
  -8   8  -2 27.7389 9.49874   2
   8   8   2 24.5541 8.02229   2
   9  -8   2 1.13509 1.43539   1
   9  -8   2 4.85780 3.98568   2
   9  -8   2 -0.8436 3.29061   3
  -9  -8  -2 -2.1137 3.22150   1
   9  -8   2 6.28868 2.35875   1
  -9  -8  -2 4.25906 4.22917   2
   9   8   2 9.06344 5.68770   2
  10  -8   2 -0.7161 3.50209   3
  10  -8   2 5.87200 2.53799   1
  10  -8   2 -0.2411 3.68642   2
  10  -8   2 7.99540 3.06555   1
 -10  -8  -2 4.04807 3.91957   2
  10   8   2 1.49091 3.08166   2
  11  -8   2 1.11478 3.82748   2
  11  -8   2 0.33934 1.38918   1
  11  -8   2 1.44382 1.94126   1
  11  -8   2 1.82626 3.74908   2
  11  -8   2 1.79496 4.67131   3
  11   8   2 1.92638 2.88456   2
  12  -8   2 27.9865 14.0965   3
  12  -8   2 7.60703 5.73275   2
  12   8   2 6.45804 4.68415   2
  12  -9  -2 123.193 25.7984   3
 -12  -9   2 134.030 24.2615   1
  11  -9  -2 67.4605 28.9206   3
  11  -9  -2 84.6432 14.8987   2
 -11  -9   2 112.998 16.8839   2
  11   9  -2 89.1896 14.1749   2
  10  -9  -2 25.0550 8.04634   2
 -10  -9   2 23.3938 12.0091   1
 -10  -9   2 15.6670 6.11310   2
  10  -9  -2 40.5723 14.0000   3
  10   9  -2 27.6512 8.18261   2
  -9  -9   2 145.058 14.8713   2
  -9  -9   2 103.046 18.7636   1
   9  -9  -2 123.187 14.4665   2
   9  -9  -2 141.549 26.5873   3
  -9   9   2 130.217 15.3957   2
   9   9  -2 118.988 13.3124   2
  -8  -9   2 987.404 53.2036   1
   8  -9  -2 984.530 47.0765   2
  -8  -9   2 1027.17 46.4320   2
   8  -9  -2 960.094 57.0395   3
   8   9  -2 993.936 45.4388   2
  -8   9   2 969.478 48.2524   2
  -7  -9   2 56.3304 14.0051   1
   7  -9  -2 14.9527 6.76801   2
   7  -9  -2 25.8443 10.7171   3
  -7  -9   2 43.1615 9.15779   2
   7   9  -2 53.1744 10.4685   2
  -7   9   2 18.9993 7.65307   2
  -6  -9   2 135.717 16.2989   1
  -6  -9   2 124.147 13.2497   2
   6  -9  -2 146.220 14.7552   2
   6  -9  -2 152.523 18.4708   3
   6   9  -2 146.414 16.3057   1
  -6   9   2 124.343 14.2727   2
   6   9  -2 153.264 14.1496   2
  -6   9   2 159.282 24.1630   3
  -5  -9   2 106.498 16.8256   1
   5  -9  -2 152.293 22.4912   3
  -5  -9   2 103.770 11.6827   2
   5  -9  -2 108.334 12.1006   2
   5   9  -2 73.2879 11.4181   2
  -5   9   2 125.065 15.6145   3
  -5   9   2 95.7944 14.5651   2
   5   9  -2 104.661 17.0029   1
   4  -9  -2 78.2627 12.0995   2
  -4  -9   2 88.6845 15.0583   1
  -4  -9   2 59.9829 10.4449   2
   4  -9  -2 80.4253 16.1446   3
   4   9  -2 78.9283 14.1715   1
  -4   9   2 102.791 18.1129   3
   4   9  -2 95.2815 13.8934   2
  -4   9   2 98.0401 11.3870   2
  -3  -9   2 1.94283 2.79163   1
  -3  -9   2 2.73119 2.95958   2
   3  -9  -2 -0.6313 1.82202   3
   3  -9  -2 -1.8898 1.41357   2
   3   9  -2 1.57745 2.62438   2
  -3   9   2 6.23291 4.50683   3
   3   9  -2 1.64870 2.31993   1
  -3   9   2 3.58508 3.24012   2
   2  -9  -2 115.356 11.9476   2
  -2  -9   2 107.409 7.72911   3
  -2  -9   2 107.777 11.0528   1
   2  -9  -2 117.839 12.5050   3
  -2  -9   2 96.1139 10.8322   2
  -2   9   2 113.978 12.3686   2
  -2   9   2 107.826 6.74057   1
  -2   9   2 103.254 7.15528   1
   2   9  -2 132.441 11.8193   1
  -2   9   2 107.148 12.0003   3
  -1  -9   2 354.916 22.4083   2
   1  -9  -2 363.014 22.4491   2
  -1  -9   2 382.198 19.3590   3
   1  -9  -2 374.466 22.2010   3
  -1   9   2 359.612 17.1587   1
  -1   9   2 385.748 22.5126   3
   1   9  -2 372.164 20.4157   1
   0  -9  -2 378.836 19.8694   1
   0  -9   2 418.466 24.2604   2
   0  -9  -2 379.047 20.7955   3
   0  -9   2 396.747 21.8347   3
   0  -9   2 390.980 19.8178   1
   0  -9  -2 419.210 23.8711   2
   0   9   2 406.521 26.7185   2
   0   9  -2 363.068 19.3228   1
   0   9   2 382.913 21.1122   3
   0   9   2 377.687 19.3683   1
  -1  -9  -2 36.1656 8.62693   2
   1  -9   2 45.5857 6.96648   1
   1  -9   2 34.4788 8.66126   2
  -1  -9  -2 40.8700 6.79727   3
   1   9   2 38.8439 7.13308   1
   1   9   2 23.9833 5.90432   2
  -1   9  -2 39.4655 6.34821   1
   1   9   2 39.5629 6.92923   3
  -1   9  -2 33.6565 8.63662   2
   2  -9   2 221.030 18.2201   3
  -2  -9  -2 237.468 16.9238   1
  -2  -9  -2 244.785 12.1091   3
  -2  -9  -2 211.210 16.8818   2
   2  -9   2 234.708 11.7055   1
   2  -9   2 214.528 17.5206   2
  -2   9  -2 234.533 11.9649   1
   2   9   2 228.747 17.2940   2
  -2   9  -2 199.398 17.0100   2
   2   9   2 246.636 16.8263   1
   3  -9   2 2.79557 3.32921   2
   3  -9   2 4.04906 1.44824   1
  -3  -9  -2 3.12254 2.88991   1
  -3  -9  -2 1.04898 2.83878   2
   3  -9   2 -1.7791 1.45811   3
  -3   9  -2 0.18399 2.35350   2
   3   9   2 2.99902 2.63928   2
   3   9   2 2.06482 2.25655   1
  -4  -9  -2 161.756 14.9371   2
  -4  -9  -2 144.485 14.9376   1
   4  -9   2 145.784 16.7513   3
   4  -9   2 164.927 15.5936   2
  -4   9  -2 117.077 13.6219   2
   4   9   2 171.605 15.1296   2
   4   9   2 174.222 15.8577   1
  -5  -9  -2 14.4300 6.37120   2
   5  -9   2 11.2102 5.23496   2
  -5  -9  -2 13.8288 6.92286   1
   5  -9   2 7.85207 5.22214   3
  -5   9  -2 13.3906 6.14863   2
   5   9   2 10.4144 6.04357   1
   5   9   2 7.49811 4.51742   2
   6  -9   2 124.903 22.4884   3
   6  -9   2 98.5018 15.8071   2
  -6  -9  -2 100.122 14.8402   2
  -6  -9  -2 99.4529 16.3052   1
  -6   9  -2 108.925 16.3594   2
   6   9   2 90.0388 14.4362   2
   6   9   2 111.794 17.8119   1
  -7  -9  -2 40.9637 13.0234   1
   7  -9   2 41.3777 10.5406   2
  -7  -9  -2 49.5195 11.5211   2
   7  -9   2 34.3713 13.8000   3
   7   9   2 40.4611 9.51830   2
  -7   9  -2 72.4210 15.2409   2
  -8  -9  -2 41.6886 13.7755   1
   8  -9   2 62.1548 13.2991   2
   8  -9   2 48.4051 15.1870   3
  -8  -9  -2 25.7033 8.54740   2
   8   9   2 29.4737 8.98021   2
  -8   9  -2 56.0294 12.7080   2
  -9  -9  -2 28.3424 9.22944   2
   9  -9   2 33.1830 10.2940   2
   9  -9   2 19.8669 9.50132   3
   9   9   2 35.9562 9.11335   2
  10  -9   2 15.6088 7.18095   2
  10  -9   2 9.02369 7.57281   3
  10   9   2 12.4079 5.98318   2
  11  -9   2 23.6554 8.14344   2
  11  -9   2 14.0526 9.59943   3
 -11  -9  -2 23.4998 8.46558   2
  11   9   2 12.6004 6.40344   2
  12  -9   2 7.22035 6.14225   2
  12 -10  -2 12.5164 6.73841   2
  11 -10  -2 111.995 27.3263   3
 -11 -10   2 111.590 17.0640   2
  11 -10  -2 116.395 18.1690   2
 -11 -10   2 107.139 21.1609   1
  11  10  -2 95.1113 15.5236   2
 -10 -10   2 85.9006 14.6413   2
 -10 -10   2 88.9715 20.7162   1
  10 -10  -2 78.2052 15.1096   2
  10 -10  -2 48.2996 15.0860   3
  10  10  -2 88.1482 14.8025   2
   9 -10  -2 226.944 27.0618   3
  -9 -10   2 254.347 20.9337   2
  -9 -10   2 257.319 26.2875   1
   9 -10  -2 242.632 21.1343   2
   9  10  -2 239.142 19.8808   2
  -9  10   2 211.671 20.8099   2
   8 -10  -2 515.214 39.7429   3
  -8 -10   2 459.196 29.3796   2
   8 -10  -2 445.786 29.8381   2
  -8 -10   2 470.649 34.8655   1
   8  10  -2 519.357 30.3296   2
  -8  10   2 487.171 32.1290   2
   7 -10  -2 842.165 50.6747   3
  -7 -10   2 849.277 46.9674   1
  -7 -10   2 787.106 40.2330   2
   7 -10  -2 811.606 41.6408   2
   7  10  -2 791.032 40.0100   2
  -7  10   2 782.117 42.2786   2
  -6 -10   2 8.39774 5.33568   1
   6 -10  -2 11.5799 6.11797   2
   6 -10  -2 7.24568 5.97757   3
  -6 -10   2 6.05541 4.19374   2
   6  10  -2 4.60578 3.67257   1
   6  10  -2 10.9026 4.93928   2
  -6  10   2 8.15808 5.37755   2
  -5 -10   2 10.4712 6.09403   1
  -5 -10   2 9.08189 4.66281   2
   5 -10  -2 16.1323 7.00367   2
   5 -10  -2 13.5106 7.65404   3
  -5  10   2 13.2820 6.15610   2
   5  10  -2 20.2401 7.01792   2
  -5  10   2 13.5862 7.54828   3
   5  10  -2 9.37628 5.38454   1
   4 -10  -2 116.603 12.9417   2
   4 -10  -2 153.646 16.8102   3
  -4 -10   2 111.090 17.3159   1
  -4 -10   2 98.1090 11.7268   2
  -4  10   2 105.294 12.6015   2
  -4  10   2 105.896 17.4804   3
   4  10  -2 72.7631 12.0339   1
   4  10  -2 94.8287 11.4076   2
   3 -10  -2 70.5928 12.8180   3
   3 -10  -2 93.4495 13.9920   2
  -3 -10   2 117.323 16.8436   1
  -3 -10   2 73.8700 11.8577   2
   3  10  -2 93.6308 11.1494   1
  -3  10   2 88.0407 15.2258   3
  -3  10   2 102.188 11.9980   2
   3  10  -2 82.9088 13.1886   2
   2 -10  -2 429.331 26.2089   3
  -2 -10   2 376.520 18.2974   3
   2 -10  -2 384.968 24.7246   2
  -2 -10   2 451.148 24.9291   1
  -2 -10   2 392.252 24.6386   2
  -2  10   2 405.288 25.1134   2
  -2  10   2 396.096 17.6258   1
   2  10  -2 360.091 23.7598   2
  -2  10   2 403.912 29.1336   3
  -2  10   2 410.554 16.9842   1
  -1 -10   2 443.225 23.9415   1
   1 -10  -2 420.526 25.7716   2
  -1 -10   2 447.576 26.6283   2
   1 -10  -2 415.324 24.8429   3
  -1 -10   2 460.265 22.5506   3
   1  10  -2 426.803 25.8702   2
  -1  10   2 451.286 25.8462   3
  -1  10   2 412.130 19.8240   1
  -1  10   2 412.785 25.6910   2
   1  10  -2 467.555 23.9642   1
   0 -10  -2 113.657 12.2336   2
   0 -10  -2 126.801 10.6796   1
   0 -10   2 96.6720 9.41500   1
   0 -10  -2 99.6051 10.2420   3
   0 -10   2 88.1027 10.0921   3
   0 -10   2 112.208 12.5392   2
   0  10   2 109.907 9.66062   1
   0  10   2 123.720 11.3900   3
   0  10  -2 113.041 12.3783   2
   0  10  -2 99.4661 9.39226   1
   0  10   2 107.672 12.0663   2
  -1 -10  -2 4.17511 3.86620   2
   1 -10   2 4.82367 3.67476   2
   1 -10   2 3.40623 2.27986   1
   1 -10   2 4.23870 3.21682   3
  -1 -10  -2 7.04427 3.16557   3
  -1 -10  -2 8.14218 4.22065   1
   1  10   2 3.47228 3.04361   2
  -1  10  -2 3.44249 2.37745   1
  -1  10  -2 1.92493 3.08059   2
   1  10   2 7.87881 4.30919   1
   2 -10   2 5.12608 3.95044   2
   2 -10   2 10.2815 3.05902   1
   2 -10   2 5.96719 4.11720   3
  -2 -10  -2 4.66784 3.73228   1
  -2 -10  -2 6.20290 2.62686   3
  -2 -10  -2 -0.6454 1.57122   2
   2  10   2 1.83050 3.09118   1
   2  10   2 3.89624 3.64582   2
  -2  10  -2 4.39512 2.30681   1
  -2  10  -2 4.03157 2.96415   2
   3 -10   2 88.8572 15.1038   2
  -3 -10  -2 60.3852 12.0033   2
   3 -10   2 74.3027 5.01524   1
  -3 -10  -2 87.1925 14.2063   1
   3 -10   2 84.1230 15.6584   3
  -3  10  -2 66.3464 5.04128   1
  -3  10  -2 91.6054 15.4134   2
   3  10   2 69.9480 12.0230   1
   3  10   2 65.8745 12.3837   2
   4 -10   2 752.018 38.7177   2
  -4 -10  -2 717.639 38.0322   1
  -4 -10  -2 699.892 36.8061   2
   4 -10   2 733.271 41.9261   3
   4  10   2 703.337 37.3203   1
  -4  10  -2 753.138 39.2654   2
   4  10   2 625.581 35.4148   2
  -5 -10  -2 301.167 22.1660   2
   5 -10   2 210.037 22.5719   3
   5 -10   2 239.215 20.8115   2
  -5 -10  -2 272.833 22.6346   1
   5  10   2 327.380 22.6408   2
   5  10   2 291.149 22.8645   1
  -5  10  -2 275.928 22.5188   2
  -6 -10  -2 37.2861 10.4014   1
   6 -10   2 50.8373 14.8131   3
  -6 -10  -2 54.2586 11.9185   2
   6 -10   2 60.3752 13.2335   2
   6  10   2 33.1779 8.99229   1
   6  10   2 35.5767 8.70680   2
  -6  10  -2 52.2055 11.4174   2
   7 -10   2 71.9493 13.9965   2
  -7 -10  -2 64.4287 13.7764   2
   7 -10   2 59.1459 15.3296   3
  -7 -10  -2 62.6838 14.7993   1
  -7  10  -2 55.7544 12.1924   2
   7  10   2 52.8127 11.4368   2
   8 -10   2 222.354 21.2500   2
  -8 -10  -2 192.357 22.3851   1
   8 -10   2 239.777 27.1343   3
  -8 -10  -2 224.828 20.8271   2
   8  10   2 211.909 19.5978   2
  -8  10  -2 205.645 21.3207   2
  -9 -10  -2 8.64753 7.10822   2
   9 -10   2 28.0134 9.90121   2
   9 -10   2 10.7614 7.50991   3
   9  10   2 17.7121 8.20945   2
  10 -10   2 2.69979 3.31594   2
 -10 -10  -2 8.32457 5.55225   2
  10 -10   2 13.9000 10.2253   3
  10  10   2 8.10179 5.59809   2
  11 -10   2 13.7675 9.03526   3
 -11 -10  -2 30.1904 9.53023   2
  11 -10   2 25.6259 9.64238   2
  12 -10   2 7.30492 6.97590   2
  12 -11  -2 7.11909 5.39017   2
 -12 -11   2 -0.3754 2.75368   2
 -11 -11   2 1.23168 2.95389   1
  11 -11  -2 -2.4347 3.39973   3
  11 -11  -2 0.63618 2.54294   2
 -11 -11   2 2.20229 4.01758   2
  11  11  -2 2.63294 3.84477   2
  10 -11  -2 -0.2325 6.13609   3
  10 -11  -2 6.46959 4.73287   2
 -10 -11   2 5.26460 4.44955   2
 -10 -11   2 9.28049 10.0583   1
  10  11  -2 6.15394 5.65659   2
   9 -11  -2 15.7038 8.99600   3
  -9 -11   2 26.9010 9.16163   2
   9 -11  -2 42.9276 11.0420   2
  -9 -11   2 12.6949 7.64707   1
  -9  11   2 36.8061 13.2715   2
   9  11  -2 41.9216 10.5798   2
   8 -11  -2 469.618 31.4565   2
  -8 -11   2 498.323 31.3328   2
  -8 -11   2 482.753 36.0166   1
   8 -11  -2 533.265 41.2992   3
  -8  11   2 451.911 32.1658   2
   8  11  -2 500.358 30.9517   2
   7 -11  -2 134.139 22.2654   3
  -7 -11   2 198.647 21.1923   1
   7 -11  -2 182.296 18.3402   2
  -7 -11   2 159.746 16.6201   2
  -7  11   2 197.489 19.3958   2
   7  11  -2 154.638 18.8203   1
   7  11  -2 157.608 16.2040   2
  -6 -11   2 -1.3653 2.21831   2
   6 -11  -2 2.35178 5.84392   3
  -6 -11   2 -0.3750 4.72328   1
   6 -11  -2 -0.3892 2.48648   2
  -6  11   2 -2.7603 1.37993   2
   6  11  -2 0.83757 2.10748   2
   6  11  -2 0.95836 4.67611   1
  -5 -11   2 5.03912 5.04349   1
   5 -11  -2 -2.6123 1.74637   3
   5 -11  -2 6.67181 4.62377   2
  -5 -11   2 1.68257 2.73988   2
   5  11  -2 -0.1216 2.37619   2
   5  11  -2 -0.8191 2.16673   1
  -5  11   2 6.12369 4.66372   2
  -4 -11   2 183.854 16.9045   2
   4 -11  -2 175.191 19.0916   3
  -4 -11   2 186.586 17.9435   1
   4 -11  -2 211.927 18.4841   2
   4  11  -2 157.149 16.1552   1
   4  11  -2 169.031 16.1408   2
  -4  11   2 178.458 17.2990   2
  -4  11   2 165.968 18.2577   3
   3 -11  -2 180.139 17.0986   2
   3 -11  -2 203.295 19.1563   3
  -3 -11   2 191.276 17.0109   1
  -3 -11   2 180.083 16.7723   2
  -3  11   2 179.406 18.0369   3
   3  11  -2 179.703 16.4593   2
  -3  11   2 152.992 15.9574   2
   3  11  -2 208.172 17.2110   1
  -2 -11   2 443.455 27.5961   2
   2 -11  -2 410.970 26.9526   2
   2 -11  -2 451.323 28.1917   3
  -2 -11   2 415.214 25.4906   1
  -2 -11   2 462.835 20.9802   3
  -2  11   2 422.643 27.2449   2
   2  11  -2 438.721 27.2915   2
  -2  11   2 459.523 18.9853   1
  -2  11   2 446.640 28.2403   3
  -2  11   2 433.703 19.5557   1
   2  11  -2 416.373 25.1412   1
   1 -11  -2 742.526 37.5037   2
  -1 -11   2 704.867 37.0832   2
   1 -11  -2 727.754 35.8999   3
  -1 -11   2 664.222 31.3268   3
  -1 -11   2 669.069 33.1594   1
  -1  11   2 698.260 29.3218   1
  -1  11   2 722.965 37.2271   2
  -1  11   2 727.294 36.1821   3
   1  11  -2 771.443 37.9781   2
   1  11  -2 672.901 32.7028   1
   0 -11   2 843.400 41.4024   2
   0 -11  -2 777.587 36.4958   3
   0 -11  -2 816.199 40.2511   2
   0  11  -2 813.150 34.7860   1
   0  11  -2 821.328 40.6759   2
   0  11   2 788.583 39.8121   2
   0  11   2 771.854 34.0238   1
   1 -11   2 66.7695 12.0175   3
  -1 -11  -2 57.4997 7.37198   3
  -1 -11  -2 81.1336 12.0585   1
  -1 -11  -2 90.4499 14.0757   2
   1 -11   2 88.0949 15.2760   2
   1 -11   2 71.4130 9.67224   1
   1  11   2 85.7728 12.4266   1
  -1  11  -2 57.5114 6.81914   1
   1  11   2 69.9929 12.2495   2
  -1  11  -2 80.3100 13.5147   2
   2 -11   2 107.067 16.9113   3
  -2 -11  -2 67.7132 6.72076   3
  -2 -11  -2 93.9446 15.8975   2
  -2 -11  -2 86.3798 13.7290   1
   2 -11   2 44.8508 10.6083   2
   2 -11   2 68.9224 6.59710   1
   2  11   2 68.8436 12.5836   2
  -2  11  -2 64.4541 13.3281   2
   2  11   2 71.4279 12.5108   1
  -2  11  -2 70.2878 6.63630   1
   3 -11   2 1945.87 63.6903   1
   3 -11   2 2036.33 80.7890   2
   3 -11   2 1949.33 82.2857   3
  -3 -11  -2 2130.33 79.5431   1
  -3 -11  -2 2068.97 80.0357   2
  -3  11  -2 2042.82 81.0957   2
   3  11   2 2023.45 79.1379   2
  -3  11  -2 1989.93 64.2020   1
   3  11   2 2056.82 78.1850   1
  -4 -11  -2 718.335 38.9404   2
  -4 -11  -2 782.519 40.7054   1
   4 -11   2 778.377 44.3576   3
   4 -11   2 765.185 40.9206   2
   4  11   2 687.199 38.2590   2
   4  11   2 764.931 39.8529   1
  -4  11  -2 684.627 39.7557   2
   5 -11   2 323.981 24.9619   2
  -5 -11  -2 335.642 25.9351   1
  -5 -11  -2 329.221 24.4905   2
   5 -11   2 319.927 28.0829   3
   5  11   2 310.648 24.7039   1
   5  11   2 322.179 24.0225   2
  -5  11  -2 329.229 25.5917   2
  -6 -11  -2 1.18268 4.41786   1
   6 -11   2 -0.5470 3.89402   3
  -6 -11  -2 10.1916 6.08677   2
   6 -11   2 -2.3844 2.00738   2
  -6  11  -2 1.04048 2.34502   2
   6  11   2 -0.2962 1.42270   1
   6  11   2 4.16876 3.58396   2
  -7 -11  -2 17.0539 8.05220   1
   7 -11   2 15.9321 7.37520   2
   7 -11   2 25.7497 12.1259   3
  -7 -11  -2 14.2075 6.46195   2
   7  11   2 12.8287 6.31980   2
  -7  11  -2 16.7731 8.65294   2
   7  11   2 16.5228 7.52837   1
   8 -11   2 3.50020 5.63131   2
   8 -11   2 26.2424 12.3744   3
  -8 -11  -2 1.79014 4.84836   1
   8  11   2 9.65657 6.23746   2
  -9 -11  -2 5.26625 4.54967   2
   9 -11   2 0.78689 3.89107   2
   9 -11   2 -1.1152 2.50837   3
   9  11   2 2.09882 3.12287   2
  -9  11  -2 2.84259 4.81013   2
  10 -11   2 16.9889 9.43457   2
 -10 -11  -2 29.0493 10.6571   2
  10 -11   2 21.0660 10.5502   3
 -11 -11  -2 24.3462 9.95667   2
  11 -11   2 22.3468 9.37591   2
 -11 -12   2 -1.6816 2.05572   2
  11 -12  -2 -0.1683 2.23576   2
  11  12  -2 2.58565 3.69188   2
 -10 -12   2 -2.6588 2.16416   1
  10 -12  -2 1.89188 3.17398   2
 -10 -12   2 0.34920 2.71939   2
  10 -12  -2 3.72464 6.42784   3
 -10  12   2 -1.4096 2.68937   2
  10  12  -2 -0.4990 2.18193   2
   9 -12  -2 20.5677 8.21593   2
   9 -12  -2 8.57545 7.30559   3
  -9 -12   2 7.21574 5.71191   1
   9  12  -2 9.63943 5.28150   2
   8 -12  -2 202.860 25.5110   3
  -8 -12   2 177.574 18.7251   2
  -8 -12   2 194.745 22.6273   1
   8  12  -2 176.634 18.2353   2
   7 -12  -2 33.5549 12.2260   3
   7 -12  -2 30.5374 9.60920   2
  -7 -12   2 23.2509 9.76521   1
  -7 -12   2 40.4287 10.4413   2
  -7  12   2 16.1432 7.20255   2
   7  12  -2 40.0095 10.4728   2
   6 -12  -2 5.50741 6.22388   3
  -6 -12   2 12.1796 6.15452   2
   6 -12  -2 18.9877 7.70692   2
  -6 -12   2 10.0771 7.04616   1
   6  12  -2 6.72240 4.39251   2
  -6  12   2 10.7559 5.78028   2
  -5 -12   2 -1.9148 2.40160   1
  -5 -12   2 3.53611 3.64329   2
   5 -12  -2 2.26222 3.66143   2
   5 -12  -2 3.48639 4.66577   3
   5  12  -2 0.55798 3.24380   1
  -5  12   2 5.36864 4.34146   2
   5  12  -2 21.0467 7.74953   2
  -4 -12   2 220.712 19.4069   2
   4 -12  -2 195.052 20.9242   3
  -4 -12   2 165.827 17.7011   1
   4 -12  -2 228.890 20.2154   2
   4  12  -2 249.241 20.0870   2
  -4  12   2 167.246 17.6830   2
   4  12  -2 200.064 18.4835   1
   3 -12  -2 430.535 30.2344   3
  -3 -12   2 476.685 29.7506   2
   3 -12  -2 509.797 30.9971   2
  -3 -12   2 415.063 27.4436   1
   3  12  -2 410.916 26.8098   1
  -3  12   2 390.419 27.9698   2
   3  12  -2 418.462 27.8257   2
   2 -12  -2 32.1746 9.39065   3
   2 -12  -2 39.4860 11.1737   2
  -2 -12   2 24.3965 8.16184   2
  -2 -12   2 28.4002 5.83032   3
  -2 -12   2 22.0019 7.53192   1
  -2  12   2 20.0119 5.04646   1
  -2  12   2 29.2584 9.37814   2
   2  12  -2 24.4251 8.75150   2
   2  12  -2 18.2123 6.54318   1
  -2  12   2 32.0857 5.73277   1
   1 -12  -2 593.398 34.9672   2
  -1 -12   2 673.432 36.6064   2
  -1 -12   2 581.371 31.2732   1
   1 -12  -2 665.689 34.4993   3
  -1 -12   2 643.404 30.6447   3
  -1  12   2 645.568 28.0268   1
  -1  12   2 593.377 34.9257   2
   1  12  -2 630.853 35.6544   2
   1  12  -2 680.920 36.0992   1
   0 -12   2 39.3764 8.15962   1
   0 -12   2 36.9857 10.5609   2
   0 -12  -2 34.9738 9.73774   2
   0 -12  -2 31.1632 8.10040   3
   0 -12   2 43.2452 9.58596   3
   0  12   2 25.5951 7.48017   2
   0  12   2 43.0837 8.57991   1
   0  12  -2 28.2900 8.15691   2
   0  12  -2 42.2839 8.09346   1
   1 -12   2 13.8839 6.16858   3
  -1 -12  -2 4.25458 3.79531   2
   1 -12   2 20.2190 7.03449   2
  -1 -12  -2 11.2423 5.56417   1
   1 -12   2 6.47192 3.52625   1
  -1 -12  -2 15.2560 4.94488   3
   1  12   2 5.61662 4.83257   1
  -1  12  -2 2.43979 3.02866   2
  -1  12  -2 13.7478 4.52876   1
   1  12   2 10.3230 5.72990   2
  -2 -12  -2 727.667 29.8578   3
  -2 -12  -2 741.540 37.3597   1
   2 -12   2 718.766 39.6960   3
   2 -12   2 749.520 29.6821   1
  -2 -12  -2 753.896 39.8788   2
   2 -12   2 707.811 39.7576   2
  -2  12  -2 648.974 38.5997   2
   2  12   2 715.236 36.1432   1
   2  12   2 744.488 39.4756   2
  -2  12  -2 735.421 29.5262   1
   3 -12   2 13.0911 3.47807   1
  -3 -12  -2 14.4798 7.25507   2
   3 -12   2 18.5285 9.01790   3
  -3 -12  -2 24.5103 8.58033   1
   3 -12   2 11.8040 6.64669   2
   3  12   2 27.5113 9.16893   1
  -3  12  -2 16.6679 3.76319   1
  -3  12  -2 10.4224 6.85134   2
   3  12   2 41.4337 11.0885   2
   4 -12   2 2210.72 88.9894   3
  -4 -12  -2 1975.64 81.5780   1
  -4 -12  -2 2082.05 82.3024   2
   4 -12   2 2071.22 83.4955   2
   4  12   2 1956.78 80.5436   1
  -4  12  -2 1969.90 83.0397   2
   4  12   2 1892.83 80.1355   2
  -5 -12  -2 55.8519 12.4551   2
  -5 -12  -2 70.3313 14.0231   1
   5 -12   2 41.3152 12.9134   3
   5 -12   2 71.8277 15.4923   2
   5  12   2 51.4047 11.8957   1
  -5  12  -2 63.5246 13.5168   2
   5  12   2 47.4773 11.7233   2
   6 -12   2 14.7321 8.17025   2
  -6 -12  -2 26.2825 9.42661   2
  -6 -12  -2 23.7214 9.70357   1
   6 -12   2 2.73168 5.74792   3
  -6  12  -2 14.3143 8.83853   2
   6  12   2 15.9467 6.52505   2
   7 -12   2 24.4165 8.51414   2
  -7 -12  -2 21.7406 10.1905   2
  -7 -12  -2 24.3646 9.77465   1
   7 -12   2 43.8931 16.4442   3
   7  12   2 7.92415 5.23741   2
   8 -12   2 32.0225 10.6033   2
  -8 -12  -2 30.1541 10.3065   2
   8 -12   2 35.0680 12.4801   3
  -8 -12  -2 31.1342 11.4593   1
  -8  12  -2 31.8877 10.8501   2
   8  12   2 39.2799 11.0912   2
  -9 -12  -2 181.140 20.2765   2
   9 -12   2 186.263 31.8439   3
   9 -12   2 214.863 22.3953   2
  10 -12   2 135.092 23.1667   2
  10 -12   2 91.4232 21.0492   3
 -10 -12  -2 103.691 17.8942   2
  11 -12   2 -0.2026 2.83076   2
 -11 -12  -2 10.0087 6.27561   2
  11 -13  -2 10.5746 6.04585   2
 -11 -13   2 16.8820 8.04626   2
 -10 -13   2 19.7659 11.8969   1
  10 -13  -2 8.11818 5.15701   2
  10 -13  -2 19.9446 11.7776   3
 -10 -13   2 31.2576 10.5922   2
  -9 -13   2 2.70683 9.39532   1
   9 -13  -2 5.33207 5.24308   2
   9 -13  -2 2.74686 10.5604   3
  -9 -13   2 -1.1698 2.35587   2
   9  13  -2 18.7310 7.55433   2
   8 -13  -2 20.1264 8.74429   2
  -8 -13   2 2.77862 5.68078   2
   8 -13  -2 10.0207 8.56153   3
  -8 -13   2 18.6743 8.71170   1
   8  13  -2 12.9398 6.35270   2
  -8  13   2 13.9689 9.08349   2
  -7 -13   2 347.598 29.5857   1
   7 -13  -2 262.472 24.1958   2
   7 -13  -2 282.716 29.9174   3
  -7 -13   2 255.299 38.7886   2
   7  13  -2 262.404 26.0985   2
  -6 -13   2 259.146 25.0416   1
   6 -13  -2 316.243 29.8500   3
  -6 -13   2 313.282 24.8607   2
  -6  13   2 265.099 27.6749   2
   6  13  -2 276.579 23.3297   2
   6  13  -2 315.646 26.5552   1
   5 -13  -2 58.3186 12.7481   2
  -5 -13   2 68.2366 14.6957   2
  -5 -13   2 60.8136 15.8927   1
  -5  13   2 74.0451 15.1520   2
   5  13  -2 58.5982 11.9649   2
  -4 -13   2 55.4412 12.6864   1
  -4 -13   2 82.7761 15.5414   2
   4 -13  -2 68.8079 16.1676   3
   4 -13  -2 48.8555 11.0787   2
  -4  13   2 64.6594 13.9647   2
   4  13  -2 66.4405 12.6312   1
   4  13  -2 62.5688 12.4519   2
  -3 -13   2 312.782 13.9802   3
  -3 -13   2 302.637 24.4676   2
  -3 -13   2 340.618 24.6974   1
   3 -13  -2 328.314 25.5787   2
   3 -13  -2 339.556 26.8906   3
   3  13  -2 325.608 23.6276   1
   3  13  -2 301.411 24.0911   2
  -3  13   2 326.922 25.7873   2
   2 -13  -2 242.013 21.2864   3
  -2 -13   2 224.268 20.6146   2
  -2 -13   2 259.096 20.1593   1
  -2 -13   2 245.611 15.1051   3
   2 -13  -2 227.695 21.0145   2
  -2  13   2 238.172 14.2844   1
  -2  13   2 243.198 13.5875   1
   2  13  -2 217.404 18.2562   1
   2  13  -2 217.966 20.2192   2
  -2  13   2 239.230 21.4644   2
   1 -13  -2 97.0192 12.3442   3
  -1 -13   2 88.5042 14.7092   2
  -1 -13   2 96.8069 11.6422   3
   1 -13  -2 97.2535 17.6048   2
  -1 -13   2 120.329 12.9220   1
   1  13  -2 114.490 18.3966   2
   1  13  -2 98.6648 14.4982   1
  -1  13   2 111.112 9.86563   1
  -1  13   2 108.688 17.4843   2
   0 -13   2 50.1819 9.93923   1
   0 -13  -2 40.0880 9.50404   3
   0 -13  -2 36.1438 9.86074   2
   0 -13   2 42.0201 10.2211   3
   0 -13   2 47.8655 11.8798   2
   0  13   2 35.5564 10.2872   2
   0  13  -2 50.0385 12.0504   2
   0  13  -2 65.0953 10.8288   1
   0  13   2 56.6253 9.95021   1
  -1 -13  -2 4.76928 4.63829   2
   1 -13   2 6.75002 5.96433   2
  -1 -13  -2 5.21675 3.52575   3
  -1 -13  -2 5.43481 4.04107   1
   1 -13   2 0.50216 3.63396   3
   1  13   2 13.6004 5.99381   2
  -1  13  -2 5.14878 4.21966   2
  -1  13  -2 11.9026 4.49702   1
   1  13   2 2.90002 3.64382   1
  -2 -13  -2 361.554 18.9211   3
   2 -13   2 378.892 27.8972   2
   2 -13   2 359.723 18.5228   1
  -2 -13  -2 352.255 24.6910   1
  -2 -13  -2 327.664 25.8879   2
   2 -13   2 370.912 27.3060   3
   2  13   2 411.885 28.2653   2
  -2  13  -2 360.284 27.3356   2
  -2  13  -2 382.887 18.8644   1
   2  13   2 355.104 23.9831   1
   3 -13   2 1183.51 58.6169   2
  -3 -13  -2 1330.99 59.8525   2
  -3 -13  -2 1298.50 57.5573   1
   3 -13   2 1306.49 61.6917   3
   3  13   2 1233.39 55.7243   1
  -3  13  -2 1223.65 42.1989   1
  -3  13  -2 1239.84 59.6853   2
   3  13   2 1176.46 57.2317   2
   4 -13   2 138.034 21.3379   2
   4 -13   2 123.429 22.3233   3
  -4 -13  -2 120.741 18.5094   1
  -4 -13  -2 98.6348 18.8633   2
   4  13   2 101.424 17.4830   1
   4  13   2 92.9135 15.5594   2
   5 -13   2 53.8282 13.0055   2
   5 -13   2 67.0979 16.3412   3
  -5 -13  -2 44.2225 15.5476   2
  -5 -13  -2 35.0041 10.1968   1
   5  13   2 64.9365 14.6036   2
  -6 -13  -2 104.913 18.8284   2
  -6 -13  -2 105.795 20.3790   1
   6 -13   2 128.445 25.5129   3
   6 -13   2 149.968 22.9034   2
   6  13   2 113.744 18.0477   2
  -7 -13  -2 -2.6138 2.83810   1
  -7 -13  -2 -2.0898 2.81449   2
   7 -13   2 3.47281 3.72412   2
   7 -13   2 -0.5777 5.67358   3
  -7  13  -2 -0.4819 1.90774   2
   7  13   2 3.08513 3.32253   2
  -8 -13  -2 32.8095 11.8665   2
   8 -13   2 42.0633 16.6054   3
   8 -13   2 48.0634 13.7133   2
   9 -13   2 57.6790 15.4398   2
   9 -13   2 57.7907 18.5884   3
  -9 -13  -2 63.9509 14.9427   2
  10 -13   2 180.809 26.9821   2
 -10 -13  -2 166.796 20.3748   2
  10 -13   2 210.992 49.8956   3
 -11 -13  -2 46.6563 13.2241   2
  10 -14  -2 8.35056 5.52757   2
 -10 -14   2 9.36364 5.64965   2
  -9 -14   2 20.8249 8.88826   2
   9 -14  -2 13.0718 8.12167   2
  -9 -14   2 7.41440 6.73929   1
   9 -14  -2 4.13684 5.67932   3
  -8 -14   2 178.105 20.2554   2
   8 -14  -2 179.158 29.4337   3
   8 -14  -2 206.408 21.8116   2
  -8 -14   2 196.407 23.8289   1
  -7 -14   2 277.684 27.2414   1
   7 -14  -2 268.748 24.9421   2
  -7 -14   2 267.150 24.7560   2
   7 -14  -2 290.068 30.5042   3
  -7  14   2 254.261 29.1935   2
   7  14  -2 253.049 23.4962   2
   6 -14  -2 177.901 19.7748   2
  -6 -14   2 148.357 18.2278   2
   6 -14  -2 186.952 23.2986   3
  -6 -14   2 220.795 23.0631   1
   6  14  -2 191.135 19.8251   2
  -5 -14   2 43.2679 13.7232   2
  -5 -14   2 31.0782 10.3706   1
   5 -14  -2 23.3962 8.62324   2
   5 -14  -2 59.1562 16.3864   3
   5  14  -2 31.1660 9.02767   2
   4 -14  -2 31.9174 10.8469   3
   4 -14  -2 63.5217 14.7355   2
  -4 -14   2 28.3852 10.2719   2
  -4 -14   2 36.1515 11.0434   1
   4  14  -2 58.8644 13.7768   1
   4  14  -2 25.2117 11.8415   2
   3 -14  -2 109.625 21.8841   2
  -3 -14   2 126.132 18.8084   1
  -3 -14   2 105.662 18.0381   2
   3 -14  -2 172.588 25.7614   3
  -3  14   2 150.837 25.7605   2
   3  14  -2 113.681 13.8590   1
   3  14  -2 123.960 21.2598   2
  -2 -14   2 22.1221 7.98967   2
  -2 -14   2 16.8045 5.04782   3
   2 -14  -2 33.0572 11.1008   2
  -2 -14   2 11.2844 5.93237   1
   2 -14  -2 28.5169 10.2338   3
  -2  14   2 15.9167 5.10724   1
   2  14  -2 26.0393 9.59223   2
  -2  14   2 24.4129 14.1706   2
   2  14  -2 6.80292 4.62696   1
  -2  14   2 23.1367 5.25373   1
   1 -14  -2 6.08420 4.57139   3
  -1 -14   2 0.51444 3.44482   1
   1 -14  -2 3.49749 3.70313   2
  -1 -14   2 2.47371 3.15940   3
  -1 -14   2 -2.9083 2.10589   2
   1  14  -2 5.85090 4.62182   1
  -1  14   2 5.19827 2.80501   1
   1  14  -2 0.62563 2.73982   2
  -1  14   2 1.82827 3.05483   2
   0 -14   2 101.138 15.2332   3
   0 -14   2 99.9058 11.3645   1
   0 -14  -2 77.8488 14.5688   2
   0 -14   2 95.0187 17.5852   2
   0 -14  -2 103.893 15.2978   3
   0  14  -2 108.344 16.7438   1
   0  14   2 100.213 17.5492   1
   1 -14   2 -1.3212 1.70186   1
   1 -14   2 1.06146 3.29457   2
  -1 -14  -2 3.80946 4.24325   3
   1 -14   2 -1.9086 2.47042   3
  -1 -14  -2 11.3180 6.68409   2
  -1  14  -2 -0.2796 1.50485   1
   1  14   2 -1.7189 1.81557   1
   2 -14   2 8.96021 6.03654   3
  -2 -14  -2 10.7675 5.78317   1
  -2 -14  -2 6.08780 3.42552   3
  -2 -14  -2 3.93540 5.31119   2
   2 -14   2 6.48307 3.58033   1
  -2  14  -2 1.46755 2.14086   1
   2  14   2 0.43859 2.20273   1
   2  14   2 9.81784 7.43495   2
  -2  14  -2 2.14719 3.54149   2
   3 -14   2 122.018 21.7950   3
   3 -14   2 142.932 21.2870   2
  -3 -14  -2 123.770 21.9424   2
  -3 -14  -2 109.396 17.1587   1
   3  14   2 88.4723 16.6182   2
   3  14   2 97.3790 15.4213   1
  -4 -14  -2 110.468 19.5364   1
   4 -14   2 85.4231 17.8996   2
   4 -14   2 143.437 24.2351   3
  -4 -14  -2 61.1855 12.9136   2
   4  14   2 88.0915 15.7477   2
  -5 -14  -2 12.0060 6.44089   2
  -5 -14  -2 -1.2298 3.18368   1
   5 -14   2 2.35882 4.23087   3
   5 -14   2 8.25923 6.73670   2
   5  14   2 8.89676 7.27028   1
   5  14   2 8.91992 5.48629   2
  -5  14  -2 -0.8570 1.90150   2
  -6 -14  -2 22.5449 8.54201   2
   6 -14   2 14.9892 7.71902   2
   6 -14   2 19.9946 10.1750   3
  -6 -14  -2 31.5980 11.4500   1
   6  14   2 20.0482 9.98540   2
   7 -14   2 47.9090 14.2637   2
  -7 -14  -2 22.6860 8.23709   2
  -7 -14  -2 30.6855 12.0958   1
   7 -14   2 44.2920 15.7424   3
   8 -14   2 8.83440 7.30155   3
  -8 -14  -2 16.3579 7.90507   2
   8 -14   2 15.1107 7.97176   2
   9 -14   2 206.937 37.7082   3
   9 -14   2 151.592 24.7937   2
  -9 -14  -2 120.700 20.2645   2
 -10 -14  -2 134.128 22.6228   2
  10 -14   2 116.554 23.9295   2
  10 -15  -2 4.92576 5.29821   2
 -10 -15   2 2.63558 4.01570   2
   9 -15  -2 4.85379 4.40173   2
  -9 -15   2 3.89691 7.42539   1
   9 -15  -2 -1.8354 2.66006   3
  -9 -15   2 -0.6760 2.69994   2
   8 -15  -2 6.44633 6.12324   2
   8 -15  -2 8.11239 9.96847   3
  -8 -15   2 16.2566 12.1396   1
  -8 -15   2 6.02739 5.54898   2
   7 -15  -2 222.939 27.7086   3
  -7 -15   2 277.525 27.7775   1
  -7 -15   2 239.712 24.1725   2
   7 -15  -2 317.804 27.5737   2
  -6 -15   2 7.00231 6.06064   1
  -6 -15   2 6.14864 6.32372   2
   6 -15  -2 10.8580 6.75908   3
   6 -15  -2 8.18205 6.14248   2
   5 -15  -2 66.4089 14.9853   2
   5 -15  -2 52.6272 14.6955   3
  -5 -15   2 61.5436 14.2689   2
  -5 -15   2 50.3766 14.1656   1
   5  15  -2 43.7317 11.8391   2
   4 -15  -2 161.665 24.1010   2
  -4 -15   2 165.067 19.1503   2
  -4 -15   2 167.248 18.9585   1
   4 -15  -2 187.171 21.6666   3
   4  15  -2 161.250 18.6254   2
  -4  15   2 163.016 19.4343   2
   3 -15  -2 50.6878 13.2620   2
  -3 -15   2 40.4177 10.7868   1
   3 -15  -2 40.3024 11.6927   3
  -3 -15   2 42.8326 11.5227   2
   3  15  -2 54.0797 12.3419   1
   3  15  -2 55.5506 13.4953   2
  -2 -15   2 7.00966 3.47667   3
   2 -15  -2 1.15219 3.92113   2
  -2 -15   2 10.6919 6.40163   1
   2 -15  -2 6.36184 5.15845   3
  -2 -15   2 7.37032 5.72069   2
   2  15  -2 6.79181 4.54998   1
  -2  15   2 4.29540 2.65614   1
  -2  15   2 10.9179 4.04155   1
   2  15  -2 3.93968 3.89762   2
   1 -15  -2 79.7859 15.3295   3
  -1 -15   2 56.4150 12.9147   2
   1 -15  -2 79.3284 17.2685   2
  -1 -15   2 69.2609 13.2129   1
  -1 -15   2 53.8152 10.8409   3
   1  15  -2 64.8020 11.9356   1
   1  15  -2 35.1425 10.6555   2
  -1  15   2 76.4163 11.0094   1
   0 -15  -2 1.97428 3.23720   3
   0 -15   2 1.35809 3.01213   1
   0 -15   2 -1.3571 2.70354   2
   0 -15  -2 1.22865 3.29476   2
   0 -15   2 -0.1866 2.81327   3
   0  15  -2 2.77454 2.93254   1
   0  15   2 -2.6559 1.46362   1
  -1 -15  -2 11.7997 6.83625   2
   1 -15   2 12.3637 6.46781   3
   1 -15   2 11.4665 5.03431   1
  -1 -15  -2 19.3218 6.25697   3
   1 -15   2 23.7681 9.21598   2
   1  15   2 15.1767 5.89548   1
  -1  15  -2 24.6417 6.61580   1
   2 -15   2 59.1408 7.11071   1
  -2 -15  -2 55.7228 8.75818   3
   2 -15   2 67.7300 16.1610   2
   2 -15   2 54.1678 13.8111   3
  -2 -15  -2 46.4668 11.5329   2
   2  15   2 68.8771 13.1068   1
   2  15   2 41.6179 10.7406   2
  -2  15  -2 54.9269 8.80325   1
  -3 -15  -2 39.4485 10.5277   1
  -3 -15  -2 43.3067 12.2642   2
   3 -15   2 44.4591 13.1593   2
   3 -15   2 51.2258 13.2740   3
  -3  15  -2 48.3474 13.4322   2
   3  15   2 77.6929 14.2919   1
   3  15   2 26.3372 8.41254   2
   4 -15   2 186.034 26.9492   2
   4 -15   2 132.361 22.4049   3
  -4 -15  -2 154.100 23.5734   1
  -4 -15  -2 100.527 17.1710   2
   4  15   2 168.289 35.4709   2
   5 -15   2 25.1970 11.2304   3
  -5 -15  -2 29.1278 10.8252   2
   5 -15   2 39.8866 13.1842   2
  -5 -15  -2 20.5672 10.2971   1
  -6 -15  -2 -2.3372 3.80599   1
   6 -15   2 -1.6522 2.05527   3
  -6 -15  -2 -1.3046 2.65449   2
   6 -15   2 -2.8961 1.99487   2
  -7 -15  -2 54.6839 15.0545   2
   7 -15   2 51.0839 17.0171   3
   7 -15   2 39.0562 12.7665   2
  -8 -15  -2 177.304 21.1316   2
   8 -15   2 113.724 23.6393   3
   8 -15   2 161.933 26.5512   2
   9 -15   2 122.806 25.5618   2
  -9 -15  -2 112.645 21.1180   2
 -10 -15  -2 10.4019 8.43129   2
  10 -15   2 25.0287 10.7214   2
  -9 -16   2 1.00475 3.68153   2
   9 -16  -2 6.10545 6.71862   2
  -8 -16   2 6.63091 6.92146   1
   8 -16  -2 2.65948 5.55835   3
  -8 -16   2 6.58133 5.74912   2
   8 -16  -2 0.26243 5.21834   2
  -7 -16   2 25.6063 10.3048   2
   7 -16  -2 12.2316 7.01450   2
   7 -16  -2 13.4999 9.04450   3
  -7 -16   2 29.5843 11.3642   1
  -6 -16   2 105.027 20.1309   1
  -6 -16   2 73.4932 16.7858   2
   6 -16  -2 111.266 21.5123   2
   6 -16  -2 111.141 22.5024   3
  -5 -16   2 233.721 23.8916   2
   5 -16  -2 193.129 22.0228   2
  -5 -16   2 232.417 24.1367   1
   5 -16  -2 208.520 24.8417   3
   4 -16  -2 16.5465 8.03935   2
  -4 -16   2 23.4545 9.99421   2
   4 -16  -2 18.9413 8.84868   3
  -4 -16   2 7.74984 5.68901   1
   4  16  -2 18.3314 8.45681   1
  -3 -16   2 7.73286 6.46995   2
   3 -16  -2 9.82359 6.48954   2
   3 -16  -2 0.32402 3.63107   3
   3  16  -2 -0.5530 2.17777   1
  -2 -16   2 162.423 17.4663   1
   2 -16  -2 219.836 22.5787   2
  -2 -16   2 165.266 13.6171   3
   2 -16  -2 218.814 21.5549   3
   2  16  -2 220.329 19.3632   1
  -2  16   2 172.795 13.3782   1
  -2  16   2 208.267 13.1572   1
  -1 -16   2 243.645 20.1783   1
   1 -16  -2 250.144 24.3708   2
   1 -16  -2 263.296 22.6552   3
  -1 -16   2 222.082 18.1487   3
  -1 -16   2 255.799 24.4752   2
   1  16  -2 251.513 20.0601   1
  -1  16   2 203.364 16.8652   1
  -1  16   2 267.036 17.4834   1
   0 -16   2 260.439 19.6529   1
   0 -16  -2 236.048 24.0796   2
   0 -16  -2 259.713 21.0959   3
   0 -16   2 272.669 25.5169   2
   0 -16   2 253.946 21.1220   3
   0  16  -2 270.368 19.4673   1
   0  16   2 294.856 20.0637   1
  -1 -16  -2 75.9272 16.8688   2
   1 -16   2 65.1574 11.0180   1
  -1 -16  -2 74.2038 12.3896   3
   1 -16   2 53.9843 13.4500   2
   1 -16   2 61.8800 13.9087   3
  -1  16  -2 73.8603 12.7960   1
   1  16   2 56.8756 12.4932   1
  -2 -16  -2 98.7840 9.71453   3
  -2 -16  -2 94.8968 18.3396   2
   2 -16   2 77.2583 18.4395   2
   2 -16   2 71.1626 16.0789   3
   2  16   2 100.087 15.9581   1
  -2  16  -2 98.0330 9.22953   1
   3 -16   2 3.60834 5.08631   2
  -3 -16  -2 2.52181 4.63912   2
   3 -16   2 -2.3350 2.03952   3
   3  16   2 -0.0356 1.48396   1
   4 -16   2 0.48806 3.68939   2
  -4 -16  -2 3.16658 3.35329   2
   4 -16   2 5.33158 4.77521   3
   4  16   2 -1.1998 2.59707   1
   5 -16   2 3.63416 4.04260   3
   5 -16   2 -2.2831 1.79339   2
  -5 -16  -2 -1.4188 1.99441   2
   6 -16   2 84.8980 17.8104   2
  -6 -16  -2 66.7672 16.4118   2
   6 -16   2 73.6058 19.3586   3
  -7 -16  -2 261.520 26.7021   2
   7 -16   2 290.159 28.7517   2
   7 -16   2 409.780 48.2498   3
  -8 -16  -2 244.634 25.9045   2
   8 -16   2 273.384 33.2556   3
  -9 -16  -2 36.4570 11.6508   2
   9 -16   2 37.2051 13.6044   2
  -8 -17   2 3.49061 5.52061   2
   8 -17  -2 4.43492 6.93209   2
   7 -17  -2 9.50340 9.15976   3
  -7 -17   2 11.9502 7.60872   1
  -7 -17   2 7.57877 7.17297   2
   7 -17  -2 10.9136 7.02206   2
  -6 -17   2 -2.4357 1.83782   2
   6 -17  -2 -0.3474 4.18674   3
   6 -17  -2 5.62155 6.16757   2
  -6 -17   2 0.93841 3.99052   1
   5 -17  -2 77.2881 19.0964   3
  -5 -17   2 44.1305 13.9546   1
  -5 -17   2 42.0745 12.6780   2
   5 -17  -2 90.9589 19.4863   2
  -4 -17   2 -0.8779 2.71440   1
   4 -17  -2 6.72336 6.76656   3
  -4 -17   2 -2.3894 3.10797   2
   4 -17  -2 -1.7361 2.52853   2
   3 -17  -2 42.3305 12.9364   3
   3 -17  -2 57.8229 13.7812   2
  -3 -17   2 77.7090 18.2190   2
  -3 -17   2 82.2063 16.5317   1
  -2 -17   2 425.391 29.8362   1
   2 -17  -2 402.308 32.8610   2
  -2 -17   2 458.136 26.7652   3
   2 -17  -2 459.468 33.5267   3
  -2 -17   2 403.863 33.4041   2
  -2  17   2 418.671 21.4115   1
  -2  17   2 454.877 23.3661   1
   2  17  -2 457.909 30.2234   1
   1 -17  -2 777.761 46.3510   2
   1 -17  -2 653.899 39.5937   3
  -1 -17   2 636.897 34.8385   3
  -1 -17   2 645.437 43.2262   2
  -1 -17   2 685.566 37.7058   1
  -1  17   2 650.078 33.6949   1
  -1  17   2 705.649 35.7257   1
   1  17  -2 674.347 37.0485   1
   0 -17  -2 80.1683 14.7302   3
   0 -17   2 56.6971 12.3883   3
   0 -17  -2 57.3736 14.8397   2
   0 -17   2 41.2700 9.74180   1
   0 -17   2 38.1643 11.7271   2
   0  17   2 62.5961 11.8807   1
   0  17  -2 63.5008 12.5011   1
   1 -17   2 219.597 24.0522   2
  -1 -17  -2 228.619 18.4617   3
   1 -17   2 220.178 21.3334   3
  -1 -17  -2 229.767 24.3371   2
   1 -17   2 193.056 16.2829   1
   1  17   2 179.146 17.5382   1
  -1  17  -2 222.416 16.6217   1
   2 -17   2 3.21647 5.34105   2
   2 -17   2 -3.4017 2.23229   3
  -2 -17  -2 -1.1518 2.34959   3
  -2 -17  -2 -2.6942 2.29827   2
  -2  17  -2 2.81240 2.19616   1
   2  17   2 2.15409 2.88640   1
  -3 -17  -2 54.2134 15.6564   2
   3 -17   2 81.1919 18.4627   3
   3 -17   2 61.7735 15.2391   2
   4 -17   2 11.7952 8.44799   2
   4 -17   2 7.19033 6.14979   3
  -4 -17  -2 11.9967 7.12971   2
   5 -17   2 91.4199 22.1859   3
   5 -17   2 56.3158 15.9174   2
  -5 -17  -2 51.6373 13.4862   2
   6 -17   2 42.7522 15.1437   3
  -6 -17  -2 58.0432 14.6496   2
   6 -17   2 72.4824 18.4209   2
   7 -17   2 370.128 37.9824   3
   7 -17   2 334.733 31.9749   2
  -7 -17  -2 410.539 63.3234   2
   8 -17   2 209.779 25.1193   2
  -8 -17  -2 110.120 20.8780   2
  -8 -18   2 2.99011 4.98764   2
   8 -18  -2 4.93945 6.08000   2
   7 -18  -2 10.5468 9.46793   3
  -7 -18   2 23.0959 12.6386   2
  -7 -18   2 6.12379 5.23379   1
   7 -18  -2 -0.8648 4.07933   2
  -6 -18   2 92.2514 20.2478   2
  -6 -18   2 59.2190 25.0595   1
   6 -18  -2 44.9758 18.4292   2
   5 -18  -2 12.2780 7.20153   2
   5 -18  -2 9.56012 7.87147   3
  -5 -18   2 5.41389 5.15201   1
  -5 -18   2 0.42205 2.56419   2
  -4 -18   2 240.490 24.4247   1
   4 -18  -2 224.104 25.8589   3
  -4 -18   2 295.826 28.5351   2
   4 -18  -2 192.473 23.5540   2
  -3 -18   2 323.995 27.7563   1
   3 -18  -2 348.011 31.3137   2
   3 -18  -2 345.038 30.8919   3
  -3 -18   2 356.990 31.9949   2
   2 -18  -2 -2.9108 4.45134   3
  -2 -18   2 8.37968 5.46175   1
  -2 -18   2 -4.5761 2.68272   2
   2 -18  -2 4.52854 6.75749   2
   2  18  -2 -1.3389 1.81110   1
  -2  18   2 4.80428 3.78200   1
  -2  18   2 4.62328 2.73073   1
  -1 -18   2 365.461 26.3506   1
  -1 -18   2 377.956 32.3395   2
   1 -18  -2 294.997 29.3198   2
   1 -18  -2 314.348 26.6326   3
  -1 -18   2 317.624 23.3580   3
   1  18  -2 346.536 25.1837   1
  -1  18   2 363.221 23.8852   1
  -1  18   2 387.153 22.6241   1
   0 -18   2 220.257 24.7791   2
   0 -18  -2 248.966 21.2402   3
   0 -18  -2 230.048 25.4318   2
   0 -18   2 205.823 19.9141   3
   0 -18   2 248.335 20.0616   1
   0  18   2 217.316 18.3715   1
   0  18   2 226.751 19.8351   1
   0  18  -2 257.966 19.8224   1
  -1 -18  -2 35.6699 13.2488   2
  -1 -18  -2 58.2487 11.5007   3
   1 -18   2 41.8732 14.2695   2
   1 -18   2 56.8949 14.1060   3
   1  18   2 37.7062 10.2239   1
  -1  18  -2 52.0399 10.2343   1
  -2 -18  -2 87.7724 19.3439   2
   2 -18   2 136.428 24.2963   2
   2 -18   2 123.652 22.2687   3
  -2  18  -2 90.6735 9.33350   1
   3 -18   2 -4.0409 2.23153   2
   3 -18   2 5.53976 6.44226   3
  -3 -18  -2 10.8861 7.60204   2
   4 -18   2 1.45471 4.55210   2
  -4 -18  -2 0.51221 4.02448   2
   4 -18   2 8.93888 7.58854   3
  -5 -18  -2 220.307 35.5966   2
   5 -18   2 220.368 27.2894   3
   5 -18   2 313.112 48.4032   2
  -6 -18  -2 143.391 24.8529   2
   6 -18   2 172.121 31.1678   3
   6 -18   2 130.494 24.8095   2
  -7 -18  -2 5.07413 5.04633   2
   7 -18   2 6.61358 6.16843   3
   7 -18   2 0.85303 2.77198   2
  -7 -19   2 10.7803 8.14984   2
   6 -19  -2 5.26881 6.39471   2
  -6 -19   2 0.91594 3.34312   2
  -6 -19   2 9.54733 6.63806   1
   6 -19  -2 6.18337 7.79890   3
  -5 -19   2 80.0050 18.1124   1
   5 -19  -2 68.6112 17.1862   2
  -5 -19   2 46.4484 13.4298   2
   5 -19  -2 58.4730 17.5296   3
  -4 -19   2 115.223 21.4081   1
  -4 -19   2 101.102 26.9019   2
   4 -19  -2 61.3111 17.2625   3
   4 -19  -2 92.8728 20.2586   2
   3 -19  -2 503.203 39.1802   3
  -3 -19   2 589.056 48.7552   2
  -3 -19   2 553.162 37.8256   1
   2 -19  -2 394.510 42.8103   2
  -2 -19   2 283.501 29.4232   2
  -2 -19   2 334.940 27.1252   1
   2 -19  -2 282.900 27.0679   3
  -2  19   2 317.297 17.6115   1
  -2  19   2 308.170 18.9869   1
   2  19  -2 293.689 32.1473   1
   1 -19  -2 123.761 21.4012   3
  -1 -19   2 108.726 21.5816   2
   1 -19  -2 102.447 21.8077   2
  -1 -19   2 125.653 19.2331   1
  -1 -19   2 114.999 13.4939   3
   1  19  -2 133.751 19.9075   1
  -1  19   2 122.552 13.8197   1
  -1  19   2 117.199 12.1527   1
   0 -19   2 16.8441 10.0273   2
   0 -19   2 15.2013 7.45504   3
   0 -19  -2 5.29377 6.08278   2
   0 -19  -2 11.8414 6.79454   3
   0  19  -2 7.45483 4.68770   1
   0  19   2 11.7895 5.90216   1
   0  19   2 2.36130 3.88691   1
   1 -19   2 7.61302 7.15481   2
   1 -19   2 12.2419 6.56138   3
  -1 -19  -2 24.6159 11.0696   2
  -1 -19  -2 18.1231 7.07235   3
  -1  19  -2 11.4339 5.35462   1
   1  19   2 10.6895 7.15162   1
   2 -19   2 48.8182 14.3079   3
  -2 -19  -2 78.2977 25.9780   2
   2  19   2 38.9866 12.6571   1
  -2  19  -2 38.4422 7.35905   1
  -3 -19  -2 20.5956 10.4691   2
   3 -19   2 25.2936 11.8196   2
   3 -19   2 21.5555 9.88999   3
  -4 -19  -2 10.8074 7.56079   2
   4 -19   2 19.3594 10.9346   3
   4 -19   2 21.9287 10.2413   2
   5 -19   2 -0.9699 3.63261   2
   5 -19   2 -0.0102 6.88554   3
  -5 -19  -2 7.75816 7.11621   2
  -6 -19  -2 131.159 24.1253   2
   6 -19   2 145.779 28.0295   3
  -5 -20   2 32.5284 13.9093   2
  -5 -20   2 28.6642 11.4636   1
   5 -20  -2 50.6829 17.3214   3
   4 -20  -2 37.0963 14.0101   3
   4 -20  -2 26.5245 11.9550   2
  -4 -20   2 40.2669 12.4721   1
  -4 -20   2 28.9895 11.6972   2
  -3 -20   2 150.229 23.6603   1
   3 -20  -2 79.3773 18.4571   2
   3 -20  -2 126.028 24.7417   3
  -3 -20   2 115.891 25.2716   2
  -2 -20   2 38.6027 13.7326   2
   2 -20  -2 18.9453 10.0601   3
   2 -20  -2 24.5907 12.0048   2
  -2 -20   2 21.0121 8.54391   1
  -2  20   2 34.4395 6.93932   1
  -2  20   2 20.8763 5.40434   1
   1 -20  -2 9.68164 7.00951   3
   1 -20  -2 12.6177 7.95658   2
  -1 -20   2 5.70903 7.10355   2
  -1 -20   2 14.4606 6.08491   3
  -1  20   2 2.50467 2.59916   1
  -1  20   2 5.98435 4.53450   1
   0 -20  -2 6.96113 5.86100   2
   0 -20   2 4.43878 4.76897   3
   0 -20  -2 11.3574 6.21164   3
   0 -20   2 5.02839 5.07065   2
   0  20   2 12.6803 6.69130   1
   0  20  -2 11.8968 5.76748   1
   0  20   2 18.7246 7.24692   1
   1 -20   2 58.8137 17.0892   2
   1 -20   2 105.482 19.5642   3
  -1 -20  -2 100.430 15.3153   3
  -1 -20  -2 74.7565 17.7106   2
   1  20   2 88.0947 16.8110   1
  -1  20  -2 78.1039 12.4858   1
  -2 -20  -2 -0.5793 3.42080   2
   2 -20   2 4.53674 4.46830   3
   2 -20   2 12.3438 7.99592   2
  -2  20  -2 10.3405 6.41727   1
  -2  20  -2 4.31425 3.33602   1
   3 -20   2 31.8946 11.1631   3
   3 -20   2 22.0148 10.8438   2
  -3 -20  -2 11.3523 7.15259   2
   4 -20   2 -0.8910 3.90974   3
  -4 -20  -2 19.7183 12.4511   2
   5 -20   2 55.6812 16.9539   3
   4 -21  -2 91.9432 24.0687   3
   3 -21  -2 14.3407 9.42918   3
   2 -21  -2 36.9172 12.6448   3
  -2 -21   2 38.4479 9.86610   3
   1 -21  -2 100.333 18.8266   3
  -1 -21   2 97.1840 15.9335   3
   1  21  -2 79.8203 16.5197   1
  -1  21   2 98.9307 11.8702   1
   0 -21  -2 8.49248 5.52635   3
   0 -21   2 3.71215 4.76379   3
   0  21   2 1.78155 3.59165   1
   0  21  -2 6.46532 4.99203   1
   0  21   2 3.80222 4.42006   1
   1 -21   2 -0.2301 3.21509   3
  -1 -21  -2 3.83743 3.98018   3
   1  21   2 0.57201 3.81287   1
  -1  21  -2 3.19246 3.27537   1
   1  21   2 0.20158 3.03383   1
   2 -21   2 3.22234 3.99955   3
  -2  21  -2 3.66760 2.76191   1
   2  21   2 -1.2955 3.10069   1
   3 -21   2 2.18941 4.94376   3
   4 -21   2 1.41191 5.08806   3
  -1 -22   2 21.8273 9.47401   3
   1 -22  -2 20.5505 9.45503   3
   0 -22  -2 9.15546 6.35544   3
   0  22   2 4.83913 5.21017   1
   1  22   2 155.161 18.7891   1
  14   0  -3 -1.7859 2.90893   3
  13   0  -3 5.71087 2.73642   2
  13   0  -3 1.42404 3.49383   3
  13   0  -3 -0.0588 1.41124   2
  12   0  -3 -1.0038 2.07572   3
  12   0  -3 1.40396 1.66248   2
  12   0  -3 0.06032 3.71316   1
  11   0  -3 116.918 21.2890   1
 -11   0   3 155.587 17.1755   1
  11   0  -3 149.482 12.8909   2
  11   0  -3 153.738 19.4805   3
  11   0  -3 160.459 11.6916   2
  10   0  -3 0.85477 1.84024   2
 -10   0   3 -1.7483 1.90874   1
  10   0  -3 -1.7672 0.85584   2
  10   0  -3 -0.3987 2.98137   3
  10   0  -3 2.34492 3.12687   1
  -9   0   3 339.452 23.2422   1
   9   0  -3 333.041 25.2934   3
   9   0  -3 298.513 17.1038   2
   9   0  -3 293.102 16.1097   2
   9   0  -3 304.530 22.4798   1
   8   0  -3 -0.8643 3.58193   3
   8   0  -3 0.57205 1.87724   2
  -8   0   3 0.97158 3.30505   3
   8   0  -3 -1.8184 1.17008   1
  -8   0   3 1.21129 2.44575   1
   8   0  -3 -3.0081 1.27000   2
   7   0  -3 46.8454 10.5227   3
  -7   0   3 10.2738 4.64629   1
   7   0  -3 21.6416 4.54883   2
   7   0  -3 30.4213 7.06384   1
   7   0  -3 29.3808 4.80245   2
  -7   0   3 29.5990 8.02095   3
   6   0  -3 -0.7587 2.16214   3
   6   0  -3 0.27112 2.08395   1
   6   0  -3 2.29021 1.67754   2
  -6   0   3 1.22683 2.22215   1
  -6   0   3 3.67910 2.88003   3
   6   0  -3 0.23212 1.40955   2
  -5   0   3 956.170 37.4985   1
   5   0  -3 930.589 32.0062   2
  -5   0   3 889.986 39.1756   3
   5   0  -3 947.849 31.5407   2
   5   0  -3 931.965 39.4128   3
   5   0  -3 909.931 37.2860   1
   4   0  -3 4.66332 2.80066   1
   4   0  -3 4.19144 1.51243   2
   4   0  -3 1.49533 2.46386   3
  -4   0   3 5.31966 3.40066   3
  -4   0   3 5.30259 2.77264   1
   4   0  -3 5.17963 1.62197   2
  -3   0   3 1752.49 64.8731   4
   3   0  -3 1772.75 65.5715   4
  -3   0   3 1673.41 64.1161   4
   3   0  -3 1778.59 67.1335   4
   2   0  -3 0.98369 1.22652   3
   2   0  -3 -0.2671 0.94533   1
  -2   0   3 2.16572 1.49316   1
  -2   0   3 1.09355 1.48725   3
   1   0  -3 1470.27 52.6007   4
   1   0  -3 1409.90 53.1266   4
  -1   0   3 1485.32 53.8826   4
   0   0  -3 0.32831 0.73434   2
   0   0   3 0.59694 0.89077   1
   0   0   3 0.42435 0.72439   2
   0   0  -3 -0.3189 0.73249   1
   1   0   3 768.539 27.3639   1
  -1   0  -3 755.885 27.4971   1
   2   0   3 0.31543 1.21123   2
   2   0   3 4.30736 2.46114   1
   3   0   3 24.8636 4.84041   1
   3   0   3 24.3279 4.67377   1
   3   0   3 27.9070 5.28619   2
   4   0   3 5.07080 2.49970   2
   4   0   3 3.05152 2.60704   1
   5   0   3 6.15004 3.17202   2
   5   0   3 9.92647 4.13473   1
   5   0   3 7.26218 3.37784   2
   5   0   3 19.8650 6.52190   3
   6   0   3 5.32495 4.39079   2
   6   0   3 9.74095 4.96457   1
   6   0   3 13.1970 5.95395   3
   6   0   3 15.2607 5.25567   2
   7   0   3 4935.62 165.189   1
   7   0   3 5132.67 170.439   3
   7   0   3 5023.72 164.459   2
   8   0   3 2.32203 2.73084   2
   8   0   3 8.87810 5.25536   1
   8   0   3 4.51942 4.14513   2
   8   0   3 7.57718 5.45268   3
   9   0   3 5.07321 3.83710   1
   9   0   3 25.5918 7.68849   2
   9   0   3 11.8330 5.40821   2
   9   0   3 5.35843 4.67782   3
  10   0   3 6.15345 6.26070   3
  10   0   3 8.12383 5.05561   2
  10   0   3 0.48422 2.58646   1
  10   0   3 -3.3297 2.57899   1
  10   0   3 1.63086 3.67749   2
  11   0   3 33.7246 10.3613   2
  11   0   3 52.2816 12.7517   1
  11   0   3 43.4967 12.9818   3
  11   0   3 39.0278 11.5642   1
  11   0   3 46.9023 11.2002   2
  12   0   3 2.73196 3.78132   2
  12   0   3 2.81511 4.05656   2
  12   0   3 -1.7339 1.96636   3
  12   0   3 4.18449 4.42975   1
  13   0   3 16.8855 7.00233   2
  13   0   3 26.9312 8.44179   2
  13   0   3 16.8248 8.54688   1
  13   0   3 17.9562 9.66511   3
  13  -1  -3 3.59317 5.72021   3
  13  -1  -3 1.01030 2.26063   2
  13  -1  -3 5.15518 2.93565   2
  13   1  -3 7.18649 3.44340   2
  13   1  -3 8.84906 5.96626   3
  13   1  -3 3.71427 2.68393   2
  12  -1  -3 3.27893 2.38160   2
  12  -1  -3 2.02653 5.44924   3
  12  -1  -3 4.14962 5.73769   1
  12   1  -3 4.80714 4.78140   3
  12   1  -3 1.53050 1.90450   2
  11  -1  -3 48.4747 7.96409   2
  11  -1  -3 48.1115 14.0051   3
 -11  -1   3 28.8472 9.63914   1
  11  -1  -3 49.5227 11.8435   1
  11   1  -3 43.6687 11.9313   3
  11   1  -3 38.4407 11.3361   1
  11   1  -3 33.8021 6.30686   2
  11   1  -3 34.5305 8.01055   2
 -10  -1   3 23.5639 8.72663   1
  10  -1  -3 21.5144 5.08166   2
  10  -1  -3 24.2257 9.69810   3
  10  -1  -3 28.6028 8.97782   1
  10  -1  -3 29.3053 6.57349   2
 -10   1   3 41.1046 10.1125   1
  10   1  -3 21.2651 7.87368   1
  10   1  -3 21.9026 5.04971   2
  10   1  -3 28.7068 9.54847   3
  10   1  -3 21.4839 5.26665   2
   9  -1  -3 0.73123 3.27132   1
   9  -1  -3 0.77209 2.14158   2
   9  -1  -3 -0.5512 2.60187   3
  -9  -1   3 5.37012 4.58445   1
   9  -1  -3 2.34443 2.12550   2
   9   1  -3 -0.5101 1.43229   2
   9   1  -3 -2.2273 1.28494   1
   9   1  -3 -1.8136 1.90134   2
  -9   1   3 0.37716 2.93034   1
   9   1  -3 3.66766 4.16200   3
   8  -1  -3 51.4607 7.45851   2
   8  -1  -3 66.6346 13.9628   3
   8  -1  -3 57.3571 10.8417   1
   8  -1  -3 53.7860 7.86017   2
  -8  -1   3 57.0450 11.3618   1
  -8   1   3 40.6034 10.2568   3
  -8   1   3 56.4277 10.3400   1
   8   1  -3 61.4690 8.03195   2
   8   1  -3 49.8722 10.7296   3
   8   1  -3 51.0565 7.81440   2
   8   1  -3 68.2592 13.0892   1
   7  -1  -3 37.3486 7.72495   1
  -7  -1   3 39.2342 8.91203   1
   7  -1  -3 23.0752 8.27216   3
  -7  -1   3 37.1212 8.71188   3
   7  -1  -3 33.9095 5.74301   2
   7  -1  -3 34.4476 5.49537   2
   7   1  -3 37.0104 8.80402   3
   7   1  -3 34.0707 5.65255   2
  -7   1   3 34.9178 7.76672   1
  -7   1   3 20.8213 7.00532   3
   7   1  -3 36.5795 9.03599   1
   7   1  -3 26.8498 4.89817   2
  -6  -1   3 64.5922 10.6180   1
   6  -1  -3 54.5336 5.45471   2
   6  -1  -3 72.5474 10.2784   1
  -6  -1   3 56.4911 9.89496   3
   6  -1  -3 58.7599 10.4300   3
   6  -1  -3 60.5224 5.36441   2
  -6   1   3 71.5495 12.6916   3
  -6   1   3 61.1799 9.24055   1
   6   1  -3 57.3013 9.97322   3
   6   1  -3 56.0786 5.10928   2
   6   1  -3 56.5287 9.57437   1
   6   1  -3 53.5772 5.40584   2
  -5  -1   3 887.225 36.8567   3
   5  -1  -3 890.085 30.3542   2
  -5  -1   3 877.030 36.4435   1
   5  -1  -3 809.454 34.2268   1
   5  -1  -3 854.834 38.4541   3
   5  -1  -3 860.718 30.6528   2
  -5   1   3 810.082 38.0035   3
   5   1  -3 903.186 30.0424   2
  -5   1   3 882.329 34.5362   1
   5   1  -3 881.823 36.6660   1
   5   1  -3 883.851 36.6430   3
  -4  -1   3 4643.94 151.584   4
  -4  -1   3 4621.44 151.974   4
   4  -1  -3 4592.10 152.915   4
   4   1  -3 4685.64 155.161   4
  -4   1   3 4482.45 150.523   4
  -4   1   3 4712.10 150.832   4
   3  -1  -3 1187.35 43.6466   3
  -3  -1   3 1164.00 41.4408   3
   3   1  -3 1163.58 41.9902   1
  -3   1   3 1142.06 43.4888   3
   2  -1  -3 22.1521 1.82561   2
  -2  -1   3 18.5382 3.52519   1
   2  -1  -3 24.7877 3.74201   1
   2  -1  -3 19.2890 3.61919   3
  -2  -1   3 16.5689 1.52012   2
  -2  -1   3 11.9984 2.81184   3
   2   1  -3 19.4675 3.89978   1
   2   1  -3 20.7717 3.60649   3
  -2   1   3 17.7151 4.12666   3
  -2   1   3 19.9195 1.82864   2
   2   1  -3 15.4556 1.55166   2
  -2   1   3 21.5532 3.35570   1
  -1  -1   3 1.70745 0.93801   2
  -1  -1   3 3.85577 1.79743   1
   1  -1  -3 1.41880 0.83951   2
   1  -1  -3 2.73239 1.62363   3
   1  -1  -3 3.36515 1.34326   1
   1   1  -3 4.19807 1.36322   2
  -1   1   3 2.00167 1.50277   3
  -1   1   3 2.22688 1.19136   1
   1   1  -3 2.96402 1.53927   1
   0  -1  -3 2246.44 81.9515   4
   0  -1   3 2361.77 78.5603   4
   0  -1   3 2478.35 79.7356   4
   0   1  -3 2313.57 89.5858   4
   0   1   3 2329.72 77.6517   4
  -1  -1  -3 38.2542 3.85157   2
  -1  -1  -3 42.7750 4.46044   1
   1  -1   3 40.5279 3.85896   1
   1  -1   3 40.8696 4.19042   2
   1   1   3 35.3631 4.01245   1
  -1   1  -3 40.6580 3.98624   1
   1   1   3 35.8608 3.78305   2
  -1   1  -3 36.3173 4.03174   2
   2  -1   3 360.721 15.6565   1
  -2  -1  -3 344.997 15.8617   2
   2  -1   3 329.382 16.1364   2
   2   1   3 332.736 16.3186   1
   2   1   3 360.165 16.0460   2
  -2   1  -3 364.482 16.0414   1
   3  -1   3 392.060 19.2389   2
   3  -1   3 370.063 18.0804   1
   3  -1   3 398.206 18.5138   1
  -3  -1  -3 429.738 19.2097   2
   3   1   3 450.092 20.3314   1
   3   1   3 396.170 18.7127   2
  -4  -1  -3 89.8225 8.27532   2
   4  -1   3 86.4146 8.23418   2
   4  -1   3 74.5670 7.73792   1
   4  -1   3 109.610 9.38686   2
   4  -1   3 96.8881 10.3690   3
   4  -1   3 90.4147 8.22932   1
   4   1   3 121.134 9.36405   2
   4   1   3 109.033 9.69802   1
   5  -1   3 76.3560 8.35796   2
   5  -1   3 92.8048 9.06408   1
   5  -1   3 82.6742 12.6443   3
   5  -1   3 90.1482 9.27011   2
   5   1   3 93.6307 8.93455   2
   5   1   3 97.7230 9.99008   1
   5   1   3 99.6567 10.3336   3
   6  -1   3 2651.88 96.8638   3
   6  -1   3 2540.84 90.6793   2
   6  -1   3 2682.52 90.2106   2
   6  -1   3 2623.30 90.7105   1
   6   1   3 2603.58 93.6244   3
   6   1   3 2557.63 92.4045   1
   6   1   3 2566.29 89.2002   2
   7  -1   3 432.887 25.2890   2
   7  -1   3 438.008 29.2559   1
   7  -1   3 513.974 28.0157   2
   7  -1   3 486.571 31.4235   3
   7   1   3 507.452 27.9054   2
   7   1   3 518.392 29.1693   1
   7   1   3 491.853 26.1062   2
   7   1   3 474.893 29.1901   3
   8  -1   3 258.365 20.1640   1
   8  -1   3 343.613 22.4118   2
   8  -1   3 268.953 23.6969   3
   8  -1   3 304.111 20.3186   2
   8  -1   3 344.325 23.0857   1
   8   1   3 285.139 19.5625   2
   8   1   3 312.491 23.5479   3
   8   1   3 317.194 21.5852   2
   8   1   3 256.562 21.2055   1
   9  -1   3 83.1754 13.4766   2
   9  -1   3 84.1722 14.9560   1
   9  -1   3 83.4238 17.0700   3
   9  -1   3 96.4298 14.1561   2
   9  -1   3 84.2337 14.6863   1
   9   1   3 77.7321 14.8270   1
   9   1   3 78.4162 14.9839   3
   9   1   3 52.2181 10.7472   2
   9   1   3 82.7205 13.1899   2
  10  -1   3 54.8996 11.9867   2
  10  -1   3 36.8967 8.88180   2
  10  -1   3 35.2153 9.77485   1
  10  -1   3 49.9891 12.7760   1
  10  -1   3 27.9556 11.7415   3
  10   1   3 32.7969 8.72548   2
  10   1   3 29.7406 10.6149   1
  10   1   3 36.1766 9.38946   2
  10   1   3 44.7542 12.2057   3
  11  -1   3 11.7952 6.93388   2
  11  -1   3 2.47309 3.71780   1
  11  -1   3 3.60978 4.82458   2
  11  -1   3 9.88277 7.12243   3
  11   1   3 11.0777 6.97232   3
  11   1   3 0.89414 4.79882   2
  11   1   3 1.12800 4.15384   2
  11   1   3 3.70409 5.13314   1
  11   1   3 3.28732 5.03509   1
  12  -1   3 24.3560 8.90585   1
  12  -1   3 49.7014 15.5270   3
  12  -1   3 56.5508 12.3632   2
  12  -1   3 44.8980 11.4756   2
  12  -1   3 25.2558 10.0978   1
  12   1   3 47.3492 10.7096   2
  12   1   3 40.4019 10.3168   2
  12   1   3 63.5105 15.2584   1
  12   1   3 42.3771 13.2227   3
  13  -1   3 20.0442 10.3419   3
  13  -1   3 12.6506 6.89939   2
  13  -1   3 3.96778 4.65367   1
  13  -1   3 13.6766 6.93110   2
  13   1   3 3.07289 3.66469   2
  13   1   3 0.03046 3.36959   1
  13   1   3 2.55828 4.16880   3
  13   1   3 9.35086 4.73344   2
  13  -2  -3 9.14090 4.81050   2
  13  -2  -3 0.16714 5.45363   1
  13  -2  -3 0.66133 4.26019   3
  13   2  -3 5.78790 5.76440   3
  13   2  -3 3.58037 3.20865   2
  13   2  -3 2.50803 3.09304   2
  12  -2  -3 64.8743 9.53864   2
  12  -2  -3 62.5964 16.9825   3
  12  -2  -3 73.0298 8.04364   2
 -12  -2   3 73.1841 16.5485   1
  12   2  -3 62.9511 7.24196   2
  12   2  -3 59.0798 16.2653   3
  11  -2  -3 324.907 24.4875   1
  11  -2  -3 325.231 18.5429   2
 -11  -2   3 279.389 25.2408   1
  11  -2  -3 317.338 20.1889   2
  11  -2  -3 361.772 31.4901   3
  11   2  -3 305.053 26.0033   3
  11   2  -3 276.983 25.4911   1
  11   2  -3 399.805 19.3960   2
  10  -2  -3 66.1249 15.4654   3
 -10  -2   3 59.5401 12.9162   1
  10  -2  -3 63.5444 10.4054   2
  10  -2  -3 55.4092 8.27844   2
  10  -2  -3 46.1715 10.1223   1
  10   2  -3 60.7371 7.03369   2
  10   2  -3 49.1833 8.02389   2
  10   2  -3 49.1006 11.5326   3
 -10   2   3 76.2152 13.2028   1
  10   2  -3 64.8412 14.5065   1
   9  -2  -3 33.9570 6.39574   2
   9  -2  -3 22.2996 7.04091   1
   9  -2  -3 21.1559 5.58651   2
  -9  -2   3 16.3171 7.73916   1
   9  -2  -3 22.2003 8.78406   3
   9   2  -3 20.0144 5.08767   2
   9   2  -3 20.9385 5.62437   2
  -9   2   3 17.3914 6.92973   1
   9   2  -3 26.4427 7.80254   3
   9   2  -3 18.1964 7.00626   1
   8  -2  -3 217.439 13.9737   2
  -8  -2   3 230.680 19.3349   1
   8  -2  -3 231.930 13.6581   2
   8  -2  -3 231.909 17.2127   1
   8  -2  -3 221.312 20.6454   3
   8   2  -3 200.769 20.0985   1
   8   2  -3 247.511 18.9854   3
  -8   2   3 249.572 17.6081   1
   8   2  -3 234.939 14.2368   2
  -8   2   3 228.503 21.2330   3
   8   2  -3 217.053 13.2974   2
  -7  -2   3 394.387 24.6313   1
   7  -2  -3 408.437 22.0708   1
  -7  -2   3 407.022 24.0503   3
   7  -2  -3 392.306 26.7913   3
   7  -2  -3 396.618 19.2120   2
   7  -2  -3 391.585 18.5456   2
   7   2  -3 399.350 18.3541   2
  -7   2   3 434.945 27.8784   3
   7   2  -3 373.523 23.1090   3
   7   2  -3 416.670 25.1555   1
  -7   2   3 400.099 23.5298   1
   6  -2  -3 298.605 15.0589   2
   6  -2  -3 291.107 21.2287   3
   6  -2  -3 284.318 16.7843   1
  -6  -2   3 306.619 18.8047   3
  -6  -2   3 305.146 19.8633   1
   6  -2  -3 312.434 14.8699   2
  -6   2   3 296.586 21.3070   3
   6   2  -3 306.878 19.8579   1
  -6   2   3 299.051 16.9946   1
   6   2  -3 318.243 14.5572   2
   6   2  -3 311.370 18.7831   3
   5  -2  -3 540.613 23.8076   1
  -5  -2   3 557.422 25.7178   3
  -5  -2   3 557.437 21.1909   2
   5  -2  -3 520.122 28.6022   3
  -5  -2   3 535.357 26.8273   1
   5  -2  -3 558.235 22.0834   2
   5   2  -3 604.005 21.5557   2
   5   2  -3 541.498 27.0107   1
  -5   2   3 551.946 23.8027   1
   5   2  -3 535.092 25.1713   3
  -5   2   3 522.004 28.7118   3
  -4  -2   3 2484.54 92.6743   4
   4  -2  -3 2575.39 93.1756   4
   4  -2  -3 2594.18 96.4091   4
  -4  -2   3 2653.02 93.7745   4
   4   2  -3 2657.34 101.311   4
  -4   2   3 2526.32 92.0640   4
  -4   2   3 2557.62 91.0828   4
   4   2  -3 2603.01 97.6744   4
  -3  -2   3 772.274 31.3026   1
  -3  -2   3 823.940 26.5550   2
   3  -2  -3 793.693 27.9404   1
   3  -2  -3 770.155 32.7626   3
  -3  -2   3 780.398 29.0349   3
   3  -2  -3 766.194 26.8455   2
   3   2  -3 748.994 31.0126   1
  -3   2   3 768.249 32.7399   3
   3   2  -3 791.901 26.4469   2
  -3   2   3 785.704 27.7585   1
  -3   2   3 772.761 27.2174   2
   3   2  -3 778.842 29.0093   3
   2  -2  -3 7.21724 3.06560   3
  -2  -2   3 6.24950 1.73864   2
  -2  -2   3 4.42714 1.93990   1
  -2  -2   3 10.9546 2.73621   3
   2  -2  -3 7.27081 2.01351   1
   2  -2  -3 8.18494 1.90200   2
   2   2  -3 7.49253 2.62703   1
   2   2  -3 6.11962 1.68367   2
  -2   2   3 9.54480 2.23411   1
  -2   2   3 9.36711 3.39637   3
  -2   2   3 6.12591 1.77542   2
   1  -2  -3 36.1001 3.25009   2
   1  -2  -3 27.2932 4.17181   3
  -1  -2   3 29.0079 3.05851   2
  -1  -2   3 29.0345 4.39726   1
   1  -2  -3 23.5514 2.72774   1
  -1   2   3 23.8278 2.81839   1
  -1   2   3 22.6523 3.99062   3
   1   2  -3 24.7102 2.92186   2
   1   2  -3 24.1927 3.97902   1
  -1   2   3 25.8873 2.88010   2
   0  -2   3 2.64793 1.43343   1
   0  -2  -3 6.46943 2.09690   2
   0  -2  -3 4.62139 1.90190   3
   0  -2   3 2.92404 1.44358   2
   0  -2  -3 4.24348 1.77279   1
   0   2   3 4.10803 1.62304   1
   0   2   3 6.70402 2.11552   3
   0   2  -3 3.44328 1.73361   2
   0   2   3 2.74781 1.39071   2
   0   2  -3 4.38472 1.75220   1
   1  -2   3 65.5424 5.07735   1
   1  -2   3 74.0570 6.13229   2
  -1   2  -3 74.0804 5.42885   1
  -1   2  -3 78.2238 6.34979   2
   1   2   3 80.1458 6.48063   1
   1   2   3 73.8196 5.85390   2
   2  -2   3 104.392 8.07932   2
  -2  -2  -3 104.353 7.69219   2
   2  -2   3 95.0084 6.60730   1
   2   2   3 116.514 8.58545   1
   2   2   3 109.702 7.80690   2
  -2   2  -3 98.1673 6.97163   1
  -2   2  -3 100.002 7.95982   2
   3  -2   3 36.5525 6.57621   2
  -3  -2  -3 31.6776 5.89607   2
   3  -2   3 28.4871 4.85956   1
   3   2   3 27.5555 5.64961   1
   3   2   3 14.1159 3.62444   2
   4  -2   3 25.5579 5.22895   1
   4  -2   3 35.4042 8.28792   3
  -4  -2  -3 25.8565 5.49462   2
   4  -2   3 35.1921 6.99084   2
   4  -2   3 24.0710 5.04210   1
   4   2   3 26.1168 5.89712   1
   4   2   3 23.8508 5.40579   2
  -5  -2  -3 164.934 12.1905   2
   5  -2   3 152.369 12.0309   2
   5  -2   3 153.687 12.5540   2
   5  -2   3 147.138 11.2959   1
   5  -2   3 150.279 11.3425   1
   5  -2   3 143.627 14.2367   3
   5   2   3 153.401 13.1150   1
   5   2   3 119.238 11.3392   3
   5   2   3 144.962 11.4617   2
   6  -2   3 639.427 29.5652   1
   6  -2   3 586.314 30.1843   2
   6  -2   3 645.211 35.7357   3
   6  -2   3 635.557 30.1704   2
   6   2   3 605.366 31.8762   1
   6   2   3 596.637 30.7284   3
   6   2   3 616.960 29.2479   2
   7  -2   3 1392.00 59.8817   2
   7  -2   3 1432.85 63.4218   3
   7  -2   3 1390.33 54.8275   1
   7  -2   3 1352.09 56.0158   2
   7  -2   3 1448.94 55.8329   1
   7   2   3 1344.80 58.1584   1
   7   2   3 1355.77 57.1018   3
   7   2   3 1336.51 54.0062   2
   8  -2   3 176.277 19.2086   3
   8  -2   3 201.598 16.4119   1
   8  -2   3 169.434 15.4748   1
   8  -2   3 160.139 14.6836   2
   8  -2   3 222.833 17.6684   2
   8   2   3 153.463 14.1493   2
   8   2   3 197.908 18.2775   1
   8   2   3 180.755 16.9018   3
   9  -2   3 1.16154 2.55129   1
   9  -2   3 3.56428 3.64252   1
   9  -2   3 2.32847 3.20891   2
   9  -2   3 4.51999 4.41554   3
   9  -2   3 -1.8942 1.11687   2
   9   2   3 -1.2485 1.80313   2
   9   2   3 -2.5408 1.56202   1
   9   2   3 -1.0518 2.22296   2
   9   2   3 0.07699 2.10927   3
  10  -2   3 41.4345 10.1578   2
  10  -2   3 41.5320 10.9011   1
  10  -2   3 21.2505 13.1114   3
  10  -2   3 31.6267 8.89530   1
  10  -2   3 36.9858 10.1342   2
  10   2   3 44.7115 9.66759   2
  10   2   3 40.5952 10.7098   2
  10   2   3 33.8572 10.5840   3
  10   2   3 30.0857 10.0702   1
  11  -2   3 -2.2094 3.80618   1
  11  -2   3 -2.1688 3.29121   2
  11  -2   3 0.99455 5.88095   3
  11  -2   3 9.66634 4.95647   1
  11  -2   3 2.81295 3.59533   2
  11   2   3 5.68873 6.05290   1
  11   2   3 6.22627 4.97920   2
  11   2   3 2.59561 4.94177   2
  11   2   3 4.58648 4.22516   3
  12  -2   3 10.5220 7.72939   3
  12  -2   3 0.96749 3.44407   1
  12  -2   3 8.06096 5.90179   2
  12  -2   3 0.85130 2.76071   1
  12  -2   3 13.3370 6.51539   2
  12   2   3 4.99161 3.63878   2
  12   2   3 3.77549 4.60775   1
  12   2   3 4.28070 4.42039   2
  12   2   3 13.9523 8.01222   3
  13  -2   3 33.1354 13.9099   3
  13  -2   3 25.4107 8.36628   2
  13  -2   3 12.5696 6.89009   2
  13  -2   3 22.3293 8.73511   1
  13   2   3 25.3106 11.9387   1
  13   2   3 19.7919 9.94850   2
  13   2   3 29.4180 9.76430   2
  13   2   3 49.0496 14.7057   3
  13  -3  -3 6.69372 3.16734   2
  13  -3  -3 20.7932 11.3225   3
  13  -3  -3 20.3785 8.05612   1
  13  -3  -3 -1.1130 3.83489   1
  13   3  -3 14.2854 7.34015   3
  12  -3  -3 54.7323 8.91790   2
  12  -3  -3 40.1206 7.50781   2
  12  -3  -3 47.2370 12.2660   1
 -12  -3   3 42.5337 13.4381   1
  12  -3  -3 50.4814 15.0095   3
  12   3  -3 43.1047 11.1707   3
  12   3  -3 48.3002 8.99299   2
  12   3  -3 41.3648 7.27820   2
  11  -3  -3 45.4039 8.14915   2
  11  -3  -3 54.0923 16.1285   3
  11  -3  -3 48.0012 8.90035   2
  11  -3  -3 55.7919 11.5035   1
 -11  -3   3 43.0647 12.1313   1
  11   3  -3 43.2773 8.41299   2
  11   3  -3 39.4188 10.9161   3
  11   3  -3 51.9352 19.0304   1
  11   3  -3 57.9872 8.57791   2
  10  -3  -3 278.375 16.5649   2
  10  -3  -3 245.781 16.5865   2
  10  -3  -3 243.195 27.5786   3
  10  -3  -3 237.951 18.8788   1
  10   3  -3 249.126 24.1676   2
  10   3  -3 256.608 21.0449   3
  10   3  -3 237.273 15.0438   2
  10   3  -3 238.918 22.4496   1
  -9  -3   3 163.857 17.9214   1
   9  -3  -3 164.545 12.8190   2
   9  -3  -3 149.697 14.6126   1
   9  -3  -3 175.536 19.8376   3
   9  -3  -3 180.479 12.6918   2
  -9   3   3 192.049 15.5416   1
   9   3  -3 173.287 12.9206   2
   9   3  -3 195.332 12.7517   2
   9   3  -3 150.880 17.3114   1
   9   3  -3 179.051 16.2607   3
   8  -3  -3 735.769 30.0635   2
  -8  -3   3 669.673 37.3658   1
   8  -3  -3 678.630 30.0836   2
   8  -3  -3 676.658 32.2462   1
   8  -3  -3 690.424 40.5626   3
   8   3  -3 676.613 37.5864   1
  -8   3   3 751.604 32.9553   1
   8   3  -3 684.707 34.0789   3
  -8   3   3 686.869 40.7524   3
   8   3  -3 644.424 28.5664   2
  -7  -3   3 149.839 15.0193   1
  -7  -3   3 154.940 13.5330   3
   7  -3  -3 154.934 11.3344   2
   7  -3  -3 167.527 17.3408   3
   7  -3  -3 181.064 12.9377   1
   7   3  -3 153.461 15.0518   1
  -7   3   3 194.556 13.2244   1
  -7   3   3 191.773 18.4505   3
   7   3  -3 166.538 11.0072   2
   7   3  -3 163.399 13.4600   3
   6  -3  -3 3.26393 2.21265   2
  -6  -3   3 4.87218 2.55354   2
  -6  -3   3 7.60444 3.60633   3
   6  -3  -3 5.14569 3.66513   3
  -6  -3   3 4.08614 2.98612   1
   6  -3  -3 6.18696 2.96500   1
   6   3  -3 3.25700 2.74563   1
  -6   3   3 1.94279 2.36857   3
  -6   3   3 5.33300 2.71710   1
   6   3  -3 3.67147 2.66383   3
   6   3  -3 5.58255 2.40205   2
  -5  -3   3 522.110 21.1163   2
   5  -3  -3 480.844 21.6266   1
   5  -3  -3 513.216 28.7342   3
  -5  -3   3 520.217 26.7365   1
  -5  -3   3 538.981 23.8381   3
   5  -3  -3 513.740 21.8910   2
  -5   3   3 506.216 22.0670   2
   5   3  -3 514.190 20.9818   2
  -5   3   3 500.957 21.6490   1
   5   3  -3 552.272 23.5748   3
  -5   3   3 534.834 29.2155   3
   5   3  -3 532.092 26.9967   1
   4  -3  -3 713.422 25.8320   1
  -4  -3   3 658.614 30.5647   1
   4  -3  -3 714.147 33.2453   3
  -4  -3   3 704.801 25.7612   2
  -4  -3   3 653.058 26.7109   3
   4  -3  -3 720.940 26.6332   2
   4   3  -3 688.598 30.8372   1
  -4   3   3 712.242 26.9929   2
   4   3  -3 653.272 25.3347   2
  -4   3   3 686.909 25.4193   1
   4   3  -3 679.697 26.8527   3
  -4   3   3 674.575 32.6997   3
  -3  -3   3 553.874 21.3200   3
   3  -3  -3 561.286 21.7035   2
  -3  -3   3 570.934 25.3768   1
  -3  -3   3 556.712 21.2272   2
   3  -3  -3 529.741 26.2270   3
   3  -3  -3 564.574 20.3198   1
   3   3  -3 554.361 25.0244   1
  -3   3   3 567.497 20.1533   1
  -3   3   3 545.360 21.9390   2
  -3   3   3 560.895 26.6406   3
   3   3  -3 514.511 20.8075   2
   3   3  -3 576.324 21.4756   3
   2  -3  -3 241.021 14.2371   3
  -2  -3   3 235.979 11.2312   2
  -2  -3   3 227.034 13.1044   1
   2  -3  -3 239.342 11.4917   2
   2  -3  -3 231.219 9.80409   1
  -2  -3   3 242.427 10.9525   3
  -2   3   3 234.225 9.92292   1
   2   3  -3 224.077 12.9533   1
  -2   3   3 240.075 11.5182   2
   2   3  -3 255.627 11.4903   2
  -2   3   3 224.656 13.9882   3
   1  -3  -3 126.634 6.78397   1
   1  -3  -3 128.194 8.88719   3
  -1  -3   3 120.525 8.17900   1
  -1  -3   3 125.683 7.77840   2
   1  -3  -3 113.836 7.38008   2
   1   3  -3 115.360 8.01635   1
   1   3  -3 126.828 7.84073   2
  -1   3   3 128.901 6.95253   1
  -1   3   3 122.345 8.72464   3
  -1   3   3 133.073 7.88895   2
   0  -3   3 30.0260 3.59542   1
   0  -3   3 28.2714 4.85887   2
   0  -3  -3 25.8273 4.23021   3
   0  -3  -3 27.5506 4.29538   2
   0   3  -3 26.6120 4.15684   1
   0   3   3 29.4568 3.72835   3
   0   3   3 26.5842 4.16743   2
   0   3   3 26.8206 4.44814   1
   0   3  -3 29.3983 4.88055   2
  -1  -3  -3 605.536 24.1662   2
   1  -3   3 585.945 22.0586   1
   1  -3   3 610.838 24.8365   2
   1   3   3 576.782 23.9405   1
  -1   3  -3 610.838 22.5457   1
   1   3   3 609.915 22.1978   3
  -1   3  -3 593.057 24.7520   2
   1   3   3 614.404 24.2338   2
  -2  -3  -3 5.43596 2.22815   2
   2  -3   3 2.42755 1.99680   2
   2  -3   3 7.11237 2.27534   1
  -2   3  -3 10.2114 3.57834   2
   2   3   3 5.82541 2.48313   2
  -2   3  -3 5.38835 2.14397   1
   2   3   3 11.6686 3.64596   1
  -3  -3  -3 97.4052 8.48638   2
   3  -3   3 101.802 7.19971   1
   3  -3   3 98.3707 9.04956   2
   3   3   3 124.002 9.33926   2
   3   3   3 97.8372 9.23855   1
  -3   3  -3 116.793 9.63506   2
   4  -3   3 5.48534 3.91148   3
  -4  -3  -3 12.6194 4.26964   2
   4  -3   3 17.7178 5.01123   2
  -4  -3  -3 8.18956 4.17620   1
   4  -3   3 12.9208 3.66405   1
   4  -3   3 13.4409 3.63539   1
   4   3   3 8.99318 3.43560   2
  -4   3  -3 13.0509 4.44265   2
   4   3   3 9.12016 4.32981   1
   5  -3   3 48.4297 7.76485   1
   5  -3   3 38.3669 7.67301   2
   5  -3   3 38.4171 9.00972   3
  -5  -3  -3 33.4916 7.12352   1
   5  -3   3 47.9515 7.47008   1
   5   3   3 44.6858 8.40651   1
   5   3   3 54.2006 8.36482   3
   5   3   3 51.1499 8.19260   2
   6  -3   3 116.406 10.3740   1
   6  -3   3 100.328 15.9484   3
   6  -3   3 100.283 11.1333   2
  -6  -3  -3 94.1956 10.1709   2
   6  -3   3 116.705 10.2826   1
   6   3   3 129.576 11.4637   2
   6   3   3 96.8009 11.5946   1
   6   3   3 112.129 10.8782   3
   7  -3   3 111.126 11.2539   1
  -7  -3  -3 104.343 11.3952   2
   7  -3   3 112.996 17.5768   3
   7  -3   3 113.030 12.6499   2
   7  -3   3 145.311 13.4586   2
   7  -3   3 104.435 10.7164   1
   7   3   3 120.882 12.4538   3
   7   3   3 99.0871 15.1858   1
   8  -3   3 23.2637 6.75070   1
   8  -3   3 22.7396 9.62485   3
   8  -3   3 24.7346 7.47515   2
   8  -3   3 20.8758 7.19563   2
   8   3   3 25.2033 7.65860   3
   8   3   3 9.63470 5.65925   1
   8   3   3 18.4610 6.08053   2
   9  -3   3 -0.6382 1.66548   1
   9  -3   3 -2.5151 1.16650   1
   9  -3   3 -0.0933 1.81268   2
   9  -3   3 0.42090 3.31161   2
   9  -3   3 -1.2792 1.62057   3
   9   3   3 2.77359 2.73106   2
   9   3   3 0.76973 2.75788   3
   9   3   3 7.48764 5.18284   1
  10  -3   3 198.487 19.1270   2
  10  -3   3 231.927 25.2553   3
  10  -3   3 189.837 17.5653   2
  10  -3   3 220.275 18.8897   1
  10  -3   3 195.753 18.5122   1
  10   3   3 190.745 21.0325   1
  10   3   3 176.554 16.7104   2
  10   3   3 171.382 17.8124   2
  10   3   3 188.546 18.8263   3
  11  -3   3 360.184 26.5344   1
  11  -3   3 340.956 26.2950   1
  11  -3   3 401.710 26.8900   2
  11  -3   3 375.522 34.4769   3
  11  -3   3 360.098 27.2375   2
  11   3   3 364.803 27.4237   2
  11   3   3 362.003 28.0100   3
  11   3   3 387.667 26.4059   2
  12  -3   3 15.4305 7.94053   1
  12  -3   3 12.6213 7.40943   3
  12  -3   3 17.2351 8.33029   1
  12   3   3 28.3838 11.3302   1
  12   3   3 9.27677 5.39408   3
  12   3   3 6.48784 4.73118   2
  12   3   3 14.7797 6.73943   2
  13  -3   3 1.20508 3.54283   2
  13  -3   3 -1.2402 2.80254   3
  13  -3   3 -1.8442 3.48061   2
  13  -3   3 6.64774 5.53831   1
  13   3   3 -2.2337 2.65211   1
  13   3   3 -1.1200 2.20709   2
  13   3   3 3.88968 5.16718   3
  13  -4  -3 2.93802 4.31498   1
  13  -4  -3 11.3501 4.70237   2
  13  -4  -3 2.11592 3.59127   1
  13  -4  -3 -1.2147 4.10011   3
  13   4  -3 3.66450 3.44975   2
  13   4  -3 2.17177 3.03687   3
  12  -4  -3 39.2728 12.0825   2
  12  -4  -3 77.5046 9.23066   2
  12  -4  -3 69.9160 19.2199   3
 -12  -4   3 79.2559 17.1873   1
  12  -4  -3 47.8072 11.3442   1
  12  -4  -3 61.9246 12.8407   1
  12   4  -3 41.5695 10.6629   3
  12   4  -3 80.3177 8.59472   2
  12   4  -3 53.3582 8.89102   2
  11  -4  -3 118.001 11.1223   2
  11  -4  -3 101.295 20.6056   3
 -11  -4   3 93.5460 17.8352   1
  11  -4  -3 103.883 11.0539   2
  11  -4  -3 88.9244 14.1705   1
  11   4  -3 97.3420 9.64937   2
  11   4  -3 98.1900 15.8328   3
  11   4  -3 105.800 10.7414   2
 -10  -4   3 4.51906 5.05765   1
  10  -4  -3 14.3994 5.56423   1
  10  -4  -3 13.8977 5.10613   2
  10  -4  -3 15.7536 5.63543   2
  10  -4  -3 0.56281 2.98451   3
  10   4  -3 6.60486 5.07312   1
  10   4  -3 1.82737 3.84580   3
  10   4  -3 12.9202 4.40684   2
  10   4  -3 13.3509 4.95566   2
   9  -4  -3 109.224 11.6206   1
   9  -4  -3 132.066 11.6224   2
  -9  -4   3 123.882 19.1357   1
   9  -4  -3 157.268 19.1092   3
   9  -4  -3 124.516 11.0180   2
   9   4  -3 121.805 18.3529   1
   9   4  -3 114.039 10.1247   2
   9   4  -3 137.383 13.2666   3
   8  -4  -3 792.814 34.4701   1
   8  -4  -3 839.222 46.0671   3
   8  -4  -3 842.359 34.5894   2
  -8  -4   3 769.528 41.5150   1
   8  -4  -3 764.610 33.2631   2
   8   4  -3 728.852 40.8302   1
  -8   4   3 786.547 34.4276   1
   8   4  -3 720.920 31.8955   2
   8   4  -3 801.895 40.1421   3
  -8   4   3 820.107 45.8696   3
  -7  -4   3 425.613 21.0695   2
   7  -4  -3 447.407 22.3301   2
   7  -4  -3 467.686 31.0224   3
   7  -4  -3 467.571 22.1349   1
  -7  -4   3 457.441 28.2047   1
   7   4  -3 417.325 27.2263   1
  -7   4   3 477.329 31.2166   3
  -7   4   3 441.589 21.4143   1
   7   4  -3 434.520 20.9826   2
   7   4  -3 464.828 23.3851   3
  -6  -4   3 10.5973 5.25604   1
   6  -4  -3 24.2617 5.65366   2
  -6  -4   3 23.5787 5.33718   3
  -6  -4   3 14.5672 4.10730   2
   6  -4  -3 18.0327 6.31057   3
   6  -4  -3 18.8263 4.49808   1
  -6   4   3 29.5383 8.34649   3
   6   4  -3 19.2998 4.87555   3
   6   4  -3 17.3906 4.33462   2
  -6   4   3 26.0487 4.92539   1
  -6   4   3 29.3224 5.83705   2
   6   4  -3 25.9388 7.69667   1
  -5  -4   3 401.574 18.2899   3
   5  -4  -3 405.848 25.1876   3
   5  -4  -3 374.710 18.4270   2
  -5  -4   3 351.467 17.3604   2
  -5  -4   3 387.616 22.6563   1
   5  -4  -3 355.628 16.2407   1
   5   4  -3 385.936 17.7224   3
  -5   4   3 356.998 24.0941   3
   5   4  -3 367.138 17.4802   2
  -5   4   3 371.744 18.8025   2
   5   4  -3 380.061 22.4857   1
  -5   4   3 372.088 16.2817   1
  -4  -4   3 1181.17 47.2075   1
   4  -4  -3 1154.86 39.0358   1
  -4  -4   3 1203.67 40.7083   3
   4  -4  -3 1148.99 49.2051   3
  -4  -4   3 1255.21 42.2212   2
   4  -4  -3 1138.01 42.2672   2
   4   4  -3 1251.89 40.7712   3
  -4   4   3 1135.84 49.0389   3
   4   4  -3 1177.02 41.7462   2
   4   4  -3 1187.50 47.0459   1
  -4   4   3 1133.54 42.8881   2
  -4   4   3 1171.76 38.8074   1
  -3  -4   3 173.442 8.66047   3
   3  -4  -3 159.349 7.51810   1
   3  -4  -3 138.981 12.3520   3
  -3  -4   3 163.457 12.1830   1
   3  -4  -3 172.305 10.4251   2
  -3  -4   3 171.674 10.1225   2
  -3   4   3 168.788 7.43835   1
  -3   4   3 156.407 10.3375   2
   3   4  -3 176.194 12.4192   1
   3   4  -3 161.880 9.81937   2
  -3   4   3 176.497 13.6390   3
   2  -4  -3 742.269 27.9352   2
  -2  -4   3 644.573 28.8131   1
   2  -4  -3 712.726 24.9081   1
  -2  -4   3 723.681 27.5482   2
   2  -4  -3 704.935 30.7626   3
  -2   4   3 728.888 31.0713   3
  -2   4   3 721.473 24.1276   1
   2   4  -3 739.312 27.5943   2
  -2   4   3 676.782 27.4264   2
   2   4  -3 758.710 29.8237   1
   1  -4  -3 12.9984 3.50790   2
  -1  -4   3 9.45483 3.09960   2
  -1  -4   3 10.8993 3.26199   1
   1  -4  -3 7.68462 2.91934   3
  -1   4   3 12.2908 3.43946   2
  -1   4   3 8.57607 3.25258   3
   1   4  -3 9.57040 3.10419   2
   1   4  -3 9.71043 3.20051   1
  -1   4   3 15.3356 3.02691   1
   0  -4   3 299.835 13.9789   1
   0  -4   3 288.145 15.2078   2
   0  -4  -3 296.097 14.9780   2
   0  -4  -3 324.975 14.8061   3
   0   4   3 286.842 14.7634   2
   0   4  -3 288.105 13.8099   1
   0   4   3 302.718 14.4009   3
   0   4  -3 301.122 15.4747   2
   0   4   3 300.418 14.2260   1
   0   4   3 294.907 13.7851   1
   1  -4   3 5.51593 2.60805   2
  -1  -4  -3 10.1360 3.38881   2
   1  -4   3 10.7122 2.66076   1
   1   4   3 9.34050 2.47778   3
   1   4   3 10.7770 3.24544   1
  -1   4  -3 8.75495 3.21360   2
  -1   4  -3 8.63901 2.57409   1
   1   4   3 9.87922 3.20951   2
   2  -4   3 169.477 11.8238   2
   2  -4   3 157.648 8.42196   1
  -2  -4  -3 161.661 11.0535   2
   2   4   3 141.245 10.4295   2
   2   4   3 159.287 11.3377   1
  -2   4  -3 155.385 8.77465   1
  -2   4  -3 149.227 11.2091   2
  -3  -4  -3 1231.88 46.8044   2
  -3  -4  -3 1264.78 48.5868   1
   3  -4   3 1220.74 47.8487   2
   3  -4   3 1288.11 52.0008   3
   3   4   3 1272.60 48.7220   1
   3   4   3 1232.11 46.8442   2
  -3   4  -3 1267.08 48.3838   2
  -3   4  -3 1296.19 43.2972   1
   4  -4   3 24.8371 5.90502   2
  -4  -4  -3 19.1951 5.21490   2
   4  -4   3 32.4320 5.20608   1
  -4  -4  -3 27.9532 7.24795   1
   4  -4   3 43.7733 10.1507   3
   4  -4   3 25.3641 4.68674   1
  -4   4  -3 35.4026 7.09688   2
   4   4   3 23.1401 5.37247   2
   4   4   3 22.3462 6.66415   1
   5  -4   3 27.8315 6.64622   2
  -5  -4  -3 40.6308 9.28250   1
   5  -4   3 41.8463 10.7534   3
   5  -4   3 41.6085 6.55184   1
  -5  -4  -3 59.7928 10.3955   2
   5  -4   3 40.9295 6.63595   1
   5   4   3 37.8234 6.72774   3
   5   4   3 34.5699 8.57062   1
  -5   4  -3 38.6154 8.59014   2
   5   4   3 37.4012 7.51815   2
  -6  -4  -3 24.6915 6.79916   2
   6  -4   3 40.8410 10.5038   3
  -6  -4  -3 42.1867 10.2655   1
   6  -4   3 28.2995 7.48908   2
   6  -4   3 20.8255 5.16058   1
   6  -4   3 37.9541 7.40466   1
   6   4   3 23.7697 5.62769   3
   6   4   3 16.9845 6.72976   1
   6   4   3 25.2072 6.54248   2
   7  -4   3 32.7038 8.14418   2
  -7  -4  -3 29.7382 7.78541   2
   7  -4   3 28.5358 9.23000   3
   7  -4   3 33.4584 7.31659   1
   7   4   3 23.8446 7.72967   1
   7   4   3 42.9445 8.60173   3
   7   4   3 23.1765 6.48778   2
   8  -4   3 3.01835 3.49747   2
   8  -4   3 4.10333 3.33059   2
   8  -4   3 6.20651 3.37090   1
   8  -4   3 2.04442 2.66647   1
   8  -4   3 0.10944 2.48228   3
   8   4   3 -0.4512 2.51135   2
   8   4   3 0.62861 3.10267   3
   8   4   3 8.62137 6.14351   1
   9  -4   3 -1.3790 1.15888   2
   9  -4   3 0.50087 2.14416   1
   9  -4   3 -0.2014 1.86013   1
   9  -4   3 10.8544 4.92402   2
   9  -4   3 6.17728 6.16316   3
   9   4   3 0.07685 2.30529   2
   9   4   3 1.02608 2.12683   3
   9   4   3 -1.7098 2.17589   1
  10  -4   3 442.489 36.6073   3
  10  -4   3 471.548 27.9897   1
  10  -4   3 397.051 26.2503   1
  10  -4   3 428.128 28.0482   2
  10  -4   3 464.568 30.3310   2
  10   4   3 414.710 27.6882   3
  10   4   3 353.176 30.2719   1
  10   4   3 430.930 27.5848   2
  11  -4   3 257.239 23.2450   2
  11  -4   3 265.239 22.1372   2
  11  -4   3 274.977 22.3648   1
  11  -4   3 290.221 30.5859   3
  11  -4   3 257.220 21.4348   1
  11   4   3 287.051 22.5381   2
  11   4   3 272.265 23.6360   2
  11   4   3 275.160 23.1252   3
  12  -4   3 38.6583 10.1778   1
  12  -4   3 43.3111 11.0459   1
  12  -4   3 49.2912 11.5169   2
  12  -4   3 45.0865 11.8495   2
  12  -4   3 40.7079 14.2600   3
  12   4   3 39.5366 10.8056   3
  13  -4   3 28.2369 9.53112   2
  13  -4   3 27.1131 13.5956   3
  13  -4   3 19.9300 7.54196   1
  13   4   3 9.07389 7.28438   1
  13   4   3 23.9374 10.6697   3
  13   4   3 25.3609 8.56699   2
  13  -5  -3 24.7875 12.8160   3
  13  -5  -3 31.6946 7.26479   2
  13  -5  -3 45.8907 10.6688   1
  13   5  -3 38.6203 10.1130   3
  13   5  -3 27.3731 6.73026   2
 -12  -5   3 0.88339 4.42948   1
  12  -5  -3 2.38457 2.49600   2
  12  -5  -3 0.56332 3.58844   3
  12  -5  -3 -1.8435 2.58344   1
  12  -5  -3 2.39484 2.95455   2
  12  -5  -3 -0.5373 2.54240   1
  12   5  -3 -2.0181 1.66601   2
  12   5  -3 1.41851 2.80612   3
  12   5  -3 1.51052 2.44009   2
  11  -5  -3 11.0205 4.90426   2
 -11  -5   3 12.1571 7.28025   1
  11  -5  -3 22.8620 10.6286   3
  11  -5  -3 6.34615 3.65949   1
  11  -5  -3 17.9043 6.15973   2
  11  -5  -3 10.7969 5.87116   1
  11   5  -3 7.36389 5.43271   3
  11   5  -3 16.5624 5.95143   2
  11   5  -3 18.4484 5.62046   2
  10  -5  -3 7.06755 3.79321   1
 -10  -5   3 19.3577 8.06682   1
  10  -5  -3 17.4658 5.95508   2
  10  -5  -3 10.1318 4.93611   2
  10  -5  -3 9.83653 7.64465   3
  10   5  -3 19.1700 8.12255   1
  10   5  -3 13.8247 4.81102   2
  10   5  -3 10.4616 5.34504   3
   9  -5  -3 68.0258 10.7322   2
   9  -5  -3 56.9213 9.24002   1
   9  -5  -3 59.4561 9.46555   2
  -9  -5   3 59.9836 18.0277   1
   9   5  -3 56.2007 8.89264   2
   9   5  -3 41.4429 8.35414   3
   9   5  -3 40.2760 13.2283   1
  -8  -5   3 292.062 23.7864   1
   8  -5  -3 268.220 16.1409   1
  -8  -5   3 244.000 16.4183   2
   8  -5  -3 312.894 26.7214   3
   8  -5  -3 286.564 18.1411   2
   8   5  -3 290.614 17.0442   2
  -8   5   3 325.987 27.1413   3
   8   5  -3 263.593 17.0618   3
   8   5  -3 277.834 23.2085   1
   7  -5  -3 16.4869 5.93382   2
  -7  -5   3 10.3573 5.25486   1
  -7  -5   3 12.5480 4.15307   2
   7  -5  -3 18.2934 7.10378   3
   7  -5  -3 16.8214 4.28477   1
   7   5  -3 6.61368 4.76423   1
   7   5  -3 30.2077 6.40746   2
  -7   5   3 20.5813 7.61758   3
   7   5  -3 12.4893 4.21101   3
  -7   5   3 25.0387 6.35955   2
  -6  -5   3 87.8090 8.37083   2
  -6  -5   3 98.9585 11.8617   1
   6  -5  -3 94.4339 15.5146   3
   6  -5  -3 105.261 7.34202   1
   6  -5  -3 88.9538 8.82035   2
   6   5  -3 76.5617 7.10470   3
  -6   5   3 93.2588 9.29011   2
  -6   5   3 98.6437 15.4050   3
   6   5  -3 99.3539 11.7561   1
  -6   5   3 88.2466 6.71843   1
   6   5  -3 91.2530 8.37097   2
  -5  -5   3 90.0390 10.6406   1
  -5  -5   3 94.8391 7.10644   3
   5  -5  -3 85.9071 5.90734   1
   5  -5  -3 84.1618 8.30552   2
   5  -5  -3 112.928 16.7379   3
  -5  -5   3 85.9803 8.07335   2
   5   5  -3 90.7893 8.04879   2
  -5   5   3 82.3534 13.4848   3
   5   5  -3 89.8670 13.3532   1
  -5   5   3 100.266 6.05703   1
  -5   5   3 87.9508 8.89472   2
   4  -5  -3 285.660 16.3781   2
   4  -5  -3 284.541 20.5517   3
   4  -5  -3 296.401 13.2443   1
  -4  -5   3 330.120 16.6807   2
  -4  -5   3 301.830 13.1202   3
  -4  -5   3 315.064 19.6358   1
  -4   5   3 327.814 21.8473   3
   4   5  -3 313.428 19.4977   1
  -4   5   3 296.169 17.0351   2
   4   5  -3 312.297 16.1403   2
  -4   5   3 316.880 11.6153   1
  -3  -5   3 186.941 11.2855   2
   3  -5  -3 125.086 12.2505   3
  -3  -5   3 186.598 13.3218   1
  -3  -5   3 174.929 8.07020   3
   3  -5  -3 138.108 10.4200   2
  -3   5   3 127.308 12.5123   3
   3   5  -3 169.080 10.9109   2
  -3   5   3 146.087 10.8072   2
   3   5  -3 168.755 12.6666   1
  -2  -5   3 59.1641 6.29806   2
   2  -5  -3 49.0677 7.36666   2
  -2  -5   3 57.4065 6.77199   1
   2  -5  -3 52.8586 8.82051   3
  -2   5   3 56.6108 6.23900   2
   2   5  -3 45.8412 5.61993   2
  -2   5   3 60.9887 4.19789   1
  -2   5   3 60.7163 7.49944   3
   2   5  -3 66.3136 7.14881   1
  -1  -5   3 1104.28 40.4758   2
   1  -5  -3 1033.90 40.6285   3
  -1  -5   3 1086.86 39.8436   1
   1   5  -3 1062.39 39.5461   1
   1   5  -3 1080.31 40.1948   2
  -1   5   3 1043.70 39.8394   2
  -1   5   3 1098.74 41.2421   3
   0  -5   3 679.327 28.8324   2
   0  -5  -3 666.655 26.9828   3
   0  -5  -3 671.683 28.2916   2
   0  -5   3 689.549 26.5931   1
   0   5  -3 686.417 26.4953   1
   0   5  -3 656.540 28.5896   2
   0   5   3 670.600 26.1609   1
   0   5   3 703.371 27.3293   3
   0   5   3 697.205 28.4936   2
  -1  -5  -3 581.530 25.3664   2
  -1  -5  -3 560.422 21.9374   3
   1  -5   3 568.337 21.7786   1
   1  -5   3 576.211 25.9438   2
   1   5   3 559.156 21.8003   3
   1   5   3 563.257 24.2982   1
  -1   5  -3 536.411 21.7068   1
  -1   5  -3 534.101 25.4349   2
  -2  -5  -3 1498.57 55.7347   1
   2  -5   3 1517.39 56.5157   2
   2  -5   3 1562.39 59.2712   3
   2   5   3 1543.59 55.9082   1
  -2   5  -3 1571.96 57.0718   2
   2   5   3 1535.92 55.5086   2
   3   5   3 2570.93 88.6676   1
  -4  -5  -3 940.023 39.3036   2
   4  -5   3 914.104 44.5120   3
   4  -5   3 963.256 33.8109   1
   4  -5   3 980.078 41.0184   2
  -4  -5  -3 848.697 40.1987   1
   4  -5   3 956.310 33.4376   1
   4   5   3 913.334 38.9490   2
   4   5   3 976.769 41.8894   1
  -4   5  -3 927.400 40.6458   2
  -5  -5  -3 51.5137 10.5605   1
   5  -5   3 53.3151 5.56618   1
  -5  -5  -3 59.9087 9.94022   2
   5  -5   3 67.8428 11.3789   2
   5  -5   3 33.9490 8.76745   3
   5  -5   3 58.4078 5.83788   1
   5   5   3 47.9711 10.0588   1
   5   5   3 61.9304 10.1906   2
   5   5   3 51.2261 5.67157   3
  -5   5  -3 67.2644 11.4689   2
  -6  -5  -3 15.4537 5.30388   2
   6  -5   3 11.1387 3.66737   1
   6  -5   3 16.3015 7.18887   3
   6  -5   3 24.0852 5.34662   1
   6  -5   3 19.4635 6.29776   2
  -6  -5  -3 33.4427 9.41825   1
  -6   5  -3 20.1145 6.73449   2
   6   5   3 31.2890 8.94337   1
   6   5   3 14.2064 4.22061   3
  -7  -5  -3 10.6562 4.94373   2
   7  -5   3 6.37821 3.70845   1
   7  -5   3 7.00449 6.33052   3
   7  -5   3 9.44113 5.20851   2
   7  -5   3 9.35047 3.84438   1
   7   5   3 11.1295 4.61472   3
   7   5   3 15.5722 6.79000   1
   7   5   3 16.1116 6.16722   2
   8  -5   3 122.770 20.4432   3
  -8  -5  -3 174.225 15.6799   2
   8  -5   3 122.445 14.0620   2
   8  -5   3 135.718 11.8357   1
   8  -5   3 116.869 11.0363   1
   8   5   3 144.936 16.6035   1
   8   5   3 108.815 12.6829   2
   8   5   3 124.721 12.1943   3
   9  -5   3 -0.0059 2.09206   3
   9  -5   3 -0.3610 1.94469   1
   9  -5   3 -0.1075 1.76793   2
   9  -5   3 5.28851 3.34849   1
   9  -5   3 1.19145 2.60605   2
   9   5   3 -0.5828 1.98069   1
   9   5   3 -0.9120 1.86469   2
   9   5   3 5.20416 3.60276   3
  10  -5   3 388.826 23.9849   1
  10  -5   3 333.373 26.2898   2
  10  -5   3 384.206 34.5493   3
  10  -5   3 340.873 25.3749   2
  10  -5   3 392.878 23.9540   1
  10   5   3 317.589 24.0341   2
  10   5   3 354.319 23.9153   3
  11  -5   3 184.633 19.5641   2
  11  -5   3 198.518 19.4201   2
  11  -5   3 209.035 17.8641   1
  11  -5   3 213.172 17.9959   1
  11  -5   3 265.793 29.7797   3
  11   5   3 165.063 17.3286   2
  11   5   3 188.993 17.8293   3
  11   5   3 166.489 18.8290   2
  12  -5   3 50.0081 11.8387   2
  12  -5   3 36.1716 10.8004   2
  12  -5   3 56.0442 11.5236   1
  12  -5   3 45.4334 15.1322   3
  12  -5   3 41.4079 10.1165   1
  12   5   3 44.5148 10.8273   3
  12   5   3 46.4702 11.5393   2
  12   5   3 58.4544 12.7628   2
  13  -5   3 0.23695 2.39144   1
  13  -5   3 0.24542 3.84196   3
  13  -5   3 5.13925 5.39010   2
  13   5   3 3.69078 5.29169   1
  13   5   3 1.88891 3.90085   3
  13   5   3 11.9005 6.98227   2
  13  -6  -3 -0.6668 3.56514   3
  13  -6  -3 3.75582 3.42565   2
  13  -6  -3 -1.2410 1.92425   1
 -13  -6   3 -0.4736 3.82843   1
  13   6  -3 3.23464 3.52792   3
  13   6  -3 0.27269 2.39135   2
  12  -6  -3 -1.1830 2.54180   3
 -12  -6   3 3.02671 4.52070   1
  12  -6  -3 5.14731 3.99637   2
  12  -6  -3 4.04268 3.33518   1
  12  -6  -3 0.82914 2.07788   2
  12  -6  -3 3.09896 3.45750   1
  12   6  -3 2.04545 2.78169   2
  12   6  -3 3.16162 3.22368   3
  12   6  -3 -1.7317 2.33340   2
  11  -6  -3 0.17807 2.74921   2
  11  -6  -3 4.47242 4.01109   2
  11  -6  -3 1.31449 2.31544   1
  11  -6  -3 -1.6425 1.65269   1
 -11  -6   3 -3.0020 2.47769   1
  11  -6  -3 -2.3014 2.58428   3
  11   6  -3 2.97747 3.42871   3
  11   6  -3 -0.3723 1.89523   2
  10  -6  -3 33.7181 8.00017   2
  10  -6  -3 31.5511 6.73351   1
 -10  -6   3 35.8192 11.5369   1
  10  -6  -3 29.1390 7.04083   1
  10  -6  -3 25.3287 10.4292   3
  10  -6  -3 32.8410 8.00746   2
  10   6  -3 32.3943 10.8953   2
  10   6  -3 21.5366 6.25005   3
   9  -6  -3 14.5612 4.69498   1
   9  -6  -3 8.28661 6.00986   3
  -9  -6   3 10.0628 4.43067   2
  -9  -6   3 3.34055 4.26505   1
   9  -6  -3 4.14425 3.55183   2
   9  -6  -3 9.84335 3.49486   1
   9   6  -3 11.2845 3.86535   3
   9   6  -3 12.0701 4.66929   2
   9   6  -3 8.61352 5.33203   1
  -8  -6   3 2.17411 2.94463   2
   8  -6  -3 6.81095 3.97875   2
   8  -6  -3 4.30930 2.59318   1
  -8  -6   3 6.77472 4.93874   1
   8  -6  -3 1.64842 4.79474   3
   8   6  -3 6.81942 3.43790   3
   8   6  -3 -0.8845 2.02476   1
  -8   6   3 15.7945 5.79686   2
   8   6  -3 1.51774 2.52308   2
  -8   6   3 2.72429 4.23313   3
  -7  -6   3 235.041 22.5527   2
   7  -6  -3 276.168 13.2860   1
   7  -6  -3 253.754 17.2294   2
  -7  -6   3 269.921 22.0789   1
   7  -6  -3 286.551 25.0402   3
   7   6  -3 244.998 16.2258   2
   7   6  -3 261.786 21.4844   1
  -7   6   3 261.652 18.0845   2
  -7   6   3 267.693 23.9037   3
   6  -6  -3 64.2256 4.93636   1
   6  -6  -3 55.9981 11.6856   3
   6  -6  -3 77.7252 11.0366   2
  -6  -6   3 72.0691 8.11016   2
  -6  -6   3 51.7401 10.0464   1
  -6   6   3 67.4645 10.5570   2
  -6   6   3 69.8010 14.3172   3
   6   6  -3 63.0999 7.60417   2
   6   6  -3 82.1413 13.7031   1
   5  -6  -3 333.396 19.1032   2
  -5  -6   3 326.424 18.3839   2
   5  -6  -3 341.393 24.4754   3
  -5  -6   3 366.943 23.1654   1
  -5   6   3 361.394 20.3081   2
  -5   6   3 351.344 24.6745   3
   5   6  -3 329.291 18.2501   2
   5   6  -3 281.577 20.6884   1
   4  -6  -3 814.849 40.5061   3
  -4  -6   3 839.941 38.4559   1
  -4  -6   3 813.372 34.4570   2
   4  -6  -3 849.378 35.3276   2
  -4   6   3 880.619 41.6138   3
   4   6  -3 829.609 34.4031   2
  -4   6   3 834.531 35.8699   2
   4   6  -3 914.618 39.1800   1
  -3  -6   3 12.0756 4.83059   1
  -3  -6   3 13.2529 2.43706   3
  -3  -6   3 19.2005 4.76300   2
   3  -6  -3 18.2109 5.82917   3
   3  -6  -3 15.9392 4.43061   2
  -3   6   3 13.5683 5.24244   3
  -3   6   3 20.7032 5.14306   2
   3   6  -3 15.1558 5.19870   1
   3   6  -3 13.1817 3.92574   2
  -2  -6   3 1.95089 1.81806   2
  -2  -6   3 2.43329 2.09896   1
   2  -6  -3 4.43138 2.69425   3
   2  -6  -3 1.34743 1.98215   2
   2   6  -3 1.75004 2.13306   1
  -2   6   3 2.09675 2.46716   3
   2   6  -3 7.64885 3.00556   2
  -2   6   3 3.74662 2.59681   2
  -2   6   3 1.71694 1.23120   1
  -2   6   3 3.75368 1.64591   1
  -1  -6   3 1094.10 41.7064   1
   1  -6  -3 1073.58 42.8297   3
  -1  -6   3 1154.34 43.2760   2
   1  -6  -3 1067.09 42.2333   2
  -1   6   3 1044.43 42.1863   2
   1   6  -3 1130.28 42.9237   2
  -1   6   3 1118.95 43.1934   3
  -1   6   3 1116.81 38.0489   1
  -1   6   3 1123.17 38.7588   1
   1   6  -3 1179.39 42.0776   1
   0  -6   3 5373.84 180.384   4
   0  -6  -3 5012.71 176.311   4
   0  -6   3 5085.61 178.694   4
   0  -6  -3 4892.57 176.832   4
   0   6  -3 4907.53 176.570   4
   0   6  -3 4989.32 177.353   4
   0   6   3 5094.38 175.886   4
   1  -6   3 418.594 17.8550   1
   1  -6   3 404.391 21.7852   2
  -1  -6  -3 396.465 17.8968   3
  -1  -6  -3 382.259 20.9605   2
   1   6   3 417.317 21.3270   2
   1   6   3 440.591 18.3946   3
   1   6   3 447.006 20.7919   1
  -1   6  -3 407.078 17.9068   1
  -1   6  -3 423.497 22.2786   2
   2  -6   3 2263.02 85.5012   2
  -2   6  -3 2336.87 82.1743   2
   2   6   3 2403.12 80.8064   2
   3   6   3 3341.96 111.296   2
  -3   6  -3 3336.11 113.127   2
  -4  -6  -3 484.730 24.9864   2
   4  -6   3 441.490 17.8248   1
   4  -6   3 424.596 24.8048   2
  -4  -6  -3 401.267 24.8298   1
   4  -6   3 471.497 29.2953   3
   4   6   3 450.579 26.1037   1
   4   6   3 459.758 24.3449   2
  -4   6  -3 448.695 25.5361   2
   5  -6   3 73.8178 13.1291   3
  -5  -6  -3 81.3266 9.82066   2
   5  -6   3 86.3731 6.55006   1
  -5  -6  -3 85.2766 13.9727   1
   5  -6   3 78.9791 6.45988   1
   5  -6   3 98.5232 11.1697   2
  -5   6  -3 90.9003 16.1035   2
   5   6   3 82.6622 6.29831   3
   5   6   3 78.4735 12.4407   2
   5   6   3 98.5894 11.5724   1
  -6  -6  -3 62.2732 11.5849   2
  -6  -6  -3 62.6497 13.3071   1
   6  -6   3 64.0288 6.38270   1
   6  -6   3 67.3910 11.4366   2
   6  -6   3 64.8283 6.34463   1
   6  -6   3 68.3348 14.7758   3
   6   6   3 52.5827 9.73897   2
  -6   6  -3 68.3291 12.7111   2
   6   6   3 54.0000 5.79171   3
   6   6   3 65.8928 13.3712   1
   7  -6   3 268.279 20.9372   2
  -7  -6  -3 305.616 23.7877   1
   7  -6   3 235.875 24.2151   3
  -7  -6  -3 251.790 19.3400   2
   7  -6   3 251.749 14.8191   1
   7  -6   3 243.867 14.4904   1
   7   6   3 271.673 15.3705   3
   7   6   3 254.855 19.1389   2
   7   6   3 226.305 21.2017   1
  -8  -6  -3 27.9026 8.67842   2
   8  -6   3 39.7795 10.4661   2
   8  -6   3 31.5002 6.83616   1
   8  -6   3 36.4224 6.98777   1
   8  -6   3 22.1582 9.70997   3
   8   6   3 39.9386 7.42697   3
   8   6   3 17.5190 6.59308   2
   8   6   3 17.2409 11.0670   1
   9  -6   3 6.55887 4.73574   2
   9  -6   3 2.99758 2.82187   1
   9  -6   3 -1.3054 1.84412   3
   9  -6   3 1.29113 2.92697   2
  -9  -6  -3 -2.2867 1.58214   2
   9  -6   3 10.1695 4.19710   1
   9   6   3 2.98241 3.24237   3
   9   6   3 -0.2178 2.13002   1
   9   6   3 3.03497 3.69693   2
  10  -6   3 46.9799 15.7781   3
  10  -6   3 45.0132 12.1664   2
  10  -6   3 50.9626 9.48892   1
  10  -6   3 34.1819 9.36309   2
  10   6   3 38.0370 8.93653   3
  10   6   3 37.0871 9.13940   2
  11  -6   3 175.754 18.3725   2
  11  -6   3 194.607 20.3634   2
  11  -6   3 175.121 15.0317   1
  11  -6   3 168.795 15.0744   1
  11  -6   3 157.338 28.2323   3
  11   6   3 183.866 15.8536   3
  12  -6   3 2.46055 2.36970   1
  12  -6   3 4.73862 5.04807   3
  12  -6   3 5.47816 4.86785   2
  12  -6   3 3.12745 3.74376   1
  12  -6   3 -0.9205 2.31451   2
  12   6   3 0.16223 2.50138   2
  12   6   3 5.50286 3.84301   3
  12   6   3 -0.8622 2.09300   2
  13  -6   3 15.8716 7.74079   2
  13  -6   3 15.3217 5.66996   1
  13   6   3 8.59464 6.47472   2
  13  -7  -3 0.90847 2.74702   2
  13   7  -3 5.36931 4.77162   2
  12  -7  -3 20.5218 6.99101   2
  12  -7  -3 25.6760 6.18296   1
  12  -7  -3 22.3295 11.2603   3
 -12  -7   3 26.7008 11.3214   1
  12  -7  -3 21.5751 6.67103   2
  12   7  -3 30.3355 8.37655   2
  12   7  -3 13.9153 5.53226   2
  11  -7  -3 182.687 30.0722   3
  11  -7  -3 204.286 13.5703   1
 -11  -7   3 188.000 22.8234   1
  11  -7  -3 192.636 16.6667   2
  11  -7  -3 227.405 18.1420   2
  11  -7  -3 204.866 13.2585   1
  11   7  -3 191.419 15.9349   2
  10  -7  -3 34.5690 12.3542   3
  10  -7  -3 50.2306 10.4632   2
 -10  -7   3 55.0013 9.83673   2
  10  -7  -3 51.5197 6.12422   1
  10  -7  -3 49.4831 5.90622   1
 -10  -7   3 60.5620 15.1999   1
  10   7  -3 46.8558 9.28995   2
   9  -7  -3 53.4533 5.52011   1
   9  -7  -3 61.1874 11.1599   2
  -9  -7   3 57.8125 10.2900   2
  -9  -7   3 42.9810 11.6832   1
   9  -7  -3 45.6766 14.3501   3
   9  -7  -3 51.1934 5.65190   1
   9   7  -3 58.5707 10.5802   2
   9   7  -3 56.1229 14.0843   1
   8  -7  -3 110.796 24.5075   3
  -8  -7   3 74.9859 15.4149   1
   8  -7  -3 93.1035 13.6914   2
  -8  -7   3 93.9903 10.3717   2
   8  -7  -3 84.3944 6.23526   1
   8  -7  -3 100.751 6.80121   1
   8   7  -3 76.5616 11.5477   2
  -8   7   3 84.0004 13.1730   2
   7  -7  -3 196.478 15.4982   2
   7  -7  -3 158.501 19.4065   3
  -7  -7   3 182.520 18.4204   1
  -7  -7   3 166.215 13.8751   2
   7   7  -3 181.818 14.2419   2
   7   7  -3 151.846 16.7324   1
  -7   7   3 180.066 20.0436   3
  -7   7   3 188.968 16.0313   2
  -6  -7   3 153.272 12.9023   2
   6  -7  -3 178.290 18.8231   3
   6  -7  -3 165.000 13.8804   2
  -6  -7   3 161.885 16.3778   1
   6   7  -3 159.548 15.9792   1
   6   7  -3 144.793 12.3982   2
  -6   7   3 182.598 18.9161   3
  -6   7   3 165.692 14.2487   2
  -5  -7   3 13.6590 5.08543   2
   5  -7  -3 16.9424 5.26932   2
   5  -7  -3 6.24319 4.84641   3
  -5  -7   3 8.97753 4.44202   1
   5   7  -3 -0.9726 2.17678   1
   5   7  -3 17.4939 5.41427   2
  -5   7   3 9.99454 5.66899   3
  -5   7   3 14.8178 5.74352   2
   4  -7  -3 62.9379 11.5530   3
   4  -7  -3 80.1370 8.93553   2
  -4  -7   3 71.7555 11.2455   2
  -4  -7   3 76.3449 11.1373   1
   4   7  -3 58.3843 9.48192   1
  -4   7   3 53.5122 10.4800   3
  -4   7   3 73.7768 8.82711   2
   4   7  -3 73.7725 8.36990   2
   3  -7  -3 10.9950 5.38172   3
  -3  -7   3 4.09561 2.65592   2
  -3  -7   3 5.74522 1.71533   3
  -3  -7   3 5.24110 3.49043   1
  -3   7   3 3.81303 3.33204   3
  -3   7   3 5.89511 3.53290   2
   3   7  -3 4.13029 3.34234   1
   3   7  -3 4.42429 2.86059   2
  -2  -7   3 579.206 27.4587   2
  -2  -7   3 539.228 32.2766   1
   2  -7  -3 605.584 30.0124   3
  -2   7   3 570.620 21.4407   1
  -2   7   3 545.879 20.4347   1
  -2   7   3 586.588 27.7243   2
  -2   7   3 610.956 29.8738   3
   2   7  -3 617.897 28.0286   1
   2   7  -3 569.956 27.1656   2
  -1  -7   3 1941.67 68.3164   1
   1   7  -3 2009.19 70.3263   2
  -1   7   3 1964.96 70.1215   3
  -1   7   3 1928.80 69.8646   2
   1   7  -3 1991.58 68.2039   1
   0  -7  -3 3199.42 127.217   4
   0  -7  -3 3251.55 128.425   4
   0  -7   3 3238.92 129.549   4
   0  -7   3 3313.60 129.683   4
   0   7   3 3179.83 127.833   4
   0   7  -3 3338.54 129.077   4
   0   7  -3 3425.20 129.550   4
   0   7   3 3335.51 127.312   4
  -1  -7  -3 309.077 15.9384   3
   1  -7   3 344.072 16.0265   1
  -1  -7  -3 353.231 18.9378   1
   1  -7   3 360.859 20.8157   2
  -1  -7  -3 318.107 19.3949   2
   1  -7   3 338.023 20.5455   3
  -1   7  -3 345.269 16.1648   1
   1   7   3 330.921 16.2665   3
   1   7   3 342.311 19.7986   2
   1   7   3 351.682 18.5859   1
  -1   7  -3 335.203 20.3329   2
   2  -7   3 658.289 32.6244   3
  -2  -7  -3 602.066 29.0160   1
   2  -7   3 599.376 29.8533   2
  -2  -7  -3 570.114 28.6908   2
   2  -7   3 600.193 22.7794   1
   2   7   3 572.218 22.4362   3
  -2   7  -3 604.041 30.1158   2
   2   7   3 578.505 28.5122   2
   2   7   3 596.291 28.4482   1
  -2   7  -3 587.441 23.2947   1
   3  -7   3 1407.89 45.1974   1
   3  -7   3 1337.77 55.1150   2
   3  -7   3 1353.73 58.5658   3
  -3  -7  -3 1338.17 53.8885   2
  -3  -7  -3 1353.94 54.7572   1
  -3   7  -3 1367.54 45.8839   1
   3   7   3 1434.91 54.3143   2
  -3   7  -3 1427.78 56.2238   2
   3   7   3 1369.74 54.5873   1
  -4  -7  -3 535.237 29.8240   1
  -4  -7  -3 548.874 28.7497   2
   4  -7   3 552.703 20.3528   1
   4  -7   3 543.840 33.2930   3
   4  -7   3 535.348 29.5325   2
  -4   7  -3 572.873 34.1506   2
   4   7   3 570.919 30.1770   1
   5  -7   3 24.0444 8.32860   3
  -5  -7  -3 18.2665 5.85281   2
   5  -7   3 29.0801 8.17343   2
   5  -7   3 30.3683 4.34021   1
   5  -7   3 31.9440 4.45776   1
  -5  -7  -3 21.1361 6.65614   1
   5   7   3 26.2310 7.67964   1
   5   7   3 34.6740 8.27132   2
  -5   7  -3 35.7622 9.47433   2
  -6  -7  -3 46.6751 10.1948   1
   6  -7   3 40.2033 5.70361   1
   6  -7   3 46.3395 4.95600   1
  -6  -7  -3 45.9078 10.1799   2
   6  -7   3 37.8832 11.6804   3
   6  -7   3 43.4589 10.2741   2
   6   7   3 37.1245 3.82313   3
   6   7   3 47.2931 9.72925   2
   6   7   3 50.7774 12.2837   1
  -6   7  -3 39.2557 9.41908   2
  -7  -7  -3 4.42897 5.84410   1
   7  -7   3 2.10053 2.55790   1
   7  -7   3 1.57321 3.52401   2
  -7  -7  -3 6.02065 4.35641   2
   7  -7   3 4.92050 2.71683   1
   7  -7   3 -1.3276 4.52075   3
   7   7   3 0.58456 4.34957   1
  -7   7  -3 7.68335 5.70645   2
   7   7   3 -0.0456 1.80051   3
   7   7   3 1.74101 3.28153   2
   8  -7   3 88.5663 18.1432   3
  -8  -7  -3 110.244 16.6670   2
   8  -7   3 90.1756 8.06716   1
   8  -7   3 93.3844 8.32237   1
   8  -7   3 117.520 18.3501   2
   8   7   3 110.676 12.9965   2
   8   7   3 90.3559 7.71920   3
   8   7   3 96.6601 18.8781   1
   9  -7   3 29.8363 6.40458   1
   9  -7   3 29.7894 12.5580   3
   9  -7   3 19.6411 5.09721   1
  -9  -7  -3 15.4722 6.64954   2
   9  -7   3 15.9125 7.61112   2
   9   7   3 17.5448 6.91206   2
   9   7   3 7.66403 3.39791   3
  10  -7   3 84.3198 8.90514   1
 -10  -7  -3 52.0689 11.9372   2
  10  -7   3 80.7603 8.68974   1
  10  -7   3 62.4635 15.0602   2
  10  -7   3 39.2099 15.3310   3
  10  -7   3 73.2937 15.1991   2
  10   7   3 61.3704 12.6559   2
  10   7   3 53.3876 8.45358   3
  11  -7   3 2.75370 4.33801   2
  11  -7   3 5.27081 4.57612   2
  11  -7   3 -3.8059 2.63483   3
  11  -7   3 1.59481 2.16447   1
  11  -7   3 4.03909 2.76093   1
  11   7   3 10.1353 6.05958   2
  12  -7   3 0.84862 3.42250   3
  12  -7   3 8.64493 4.03776   1
  12  -7   3 2.07310 3.88561   1
  12  -7   3 5.32610 4.45745   2
  12   7   3 4.33661 4.76523   2
  12   7   3 6.30745 3.49973   3
  13  -8  -3 10.6203 5.85584   2
  12  -8  -3 230.024 19.4069   2
  12  -8  -3 284.642 21.2984   2
 -12  -8   3 243.313 27.4768   1
  12  -8  -3 272.104 32.3217   3
  12   8  -3 231.901 18.5825   2
  11  -8  -3 48.9509 15.9405   3
  11  -8  -3 60.5278 11.7570   2
 -11  -8   3 76.0966 17.4997   1
  11  -8  -3 61.0425 11.7656   2
  11   8  -3 52.6487 10.3708   2
  10  -8  -3 79.0076 17.7903   3
  10  -8  -3 100.579 15.2128   2
 -10  -8   3 92.3153 13.7954   2
 -10  -8   3 92.4815 18.0276   1
  10   8  -3 84.9878 13.0093   2
  -9  -8   3 23.4899 6.63668   2
   9  -8  -3 12.2006 5.71854   2
   9  -8  -3 19.8217 10.3821   3
  -9  -8   3 15.8743 7.55275   1
  -9   8   3 32.6148 8.98791   2
   9   8  -3 14.4634 5.58512   2
   8  -8  -3 349.691 30.5893   3
  -8  -8   3 296.180 20.3886   2
  -8  -8   3 329.431 27.0084   1
   8  -8  -3 284.752 20.7714   2
   8   8  -3 322.427 20.6761   2
  -8   8   3 275.208 21.3178   2
  -7  -8   3 27.5115 9.16124   1
  -7  -8   3 55.7777 10.3331   2
   7  -8  -3 67.0230 11.8677   2
   7  -8  -3 86.9208 18.3490   3
   7   8  -3 37.3240 12.8899   1
   7   8  -3 63.3266 11.0510   2
  -7   8   3 76.5481 13.6885   2
  -6  -8   3 25.8061 7.36043   2
   6  -8  -3 59.3041 11.5676   2
  -6  -8   3 19.6485 7.87639   1
   6  -8  -3 20.6821 8.28294   3
  -6   8   3 44.6547 12.5922   3
   6   8  -3 31.2845 9.36193   1
  -6   8   3 37.5680 9.07326   2
   6   8  -3 30.8339 7.66377   2
  -5  -8   3 9.12109 4.37822   2
   5  -8  -3 20.5242 6.12623   2
  -5  -8   3 18.4595 7.60290   1
   5  -8  -3 22.5523 8.87242   3
  -5   8   3 24.8783 8.80945   3
   5   8  -3 18.1372 7.37746   1
   5   8  -3 17.4842 5.97324   2
  -5   8   3 20.5719 6.84629   2
  -4  -8   3 2.22444 2.78276   2
  -4  -8   3 0.52587 3.61518   1
   4  -8  -3 -0.6987 1.97095   3
   4  -8  -3 3.07380 2.58042   2
   4   8  -3 1.67448 2.20322   2
  -4   8   3 4.45754 2.74341   2
   4   8  -3 -2.0269 2.06237   1
  -4   8   3 1.37573 3.22764   3
  -3  -8   3 99.2748 5.66258   3
   3  -8  -3 86.2339 9.85849   2
  -3  -8   3 110.924 11.4550   1
  -3  -8   3 88.1545 9.54256   2
   3  -8  -3 90.0731 14.5124   3
   3   8  -3 108.516 12.7316   1
  -3   8   3 73.4173 12.0904   3
  -3   8   3 95.2536 13.5625   2
   3   8  -3 79.5113 9.18176   2
   2  -8  -3 13.4633 5.04844   2
   2  -8  -3 28.6467 7.52109   3
  -2  -8   3 28.4384 7.31370   1
  -2  -8   3 17.8866 4.02575   3
  -2  -8   3 19.3385 5.55343   2
  -2   8   3 13.3664 4.90680   2
  -2   8   3 23.4139 6.93912   3
  -2   8   3 27.7018 4.39701   1
  -2   8   3 23.4013 3.63422   1
   2   8  -3 22.7699 6.20787   1
   2   8  -3 19.9663 6.17342   2
  -1  -8   3 195.350 13.6418   1
   1  -8  -3 178.424 14.0624   3
  -1  -8   3 190.279 12.5889   3
  -1  -8   3 202.667 15.1891   2
   1  -8  -3 208.411 15.1131   2
  -1   8   3 197.130 14.8710   2
  -1   8   3 191.537 11.6660   1
  -1   8   3 165.844 13.8026   3
   1   8  -3 201.696 14.9724   2
  -1   8   3 210.385 11.4099   1
   1   8  -3 177.218 13.0002   1
   0  -8   3 690.589 32.3412   3
   0  -8  -3 713.039 31.3965   3
   0  -8   3 737.193 30.5456   1
   0  -8   3 750.950 34.7739   2
   0  -8  -3 744.365 33.9208   2
   0   8   3 784.149 30.4556   1
   0   8  -3 739.583 30.5801   1
   0   8   3 703.339 33.5706   2
   0   8  -3 733.474 34.3637   2
   0   8   3 730.886 31.6661   3
   1  -8   3 607.382 29.5309   2
   1  -8   3 522.462 28.0341   3
  -1  -8  -3 530.024 25.8934   1
  -1  -8  -3 559.609 28.0797   2
   1  -8   3 537.384 22.7865   1
  -1  -8  -3 578.491 24.0142   3
  -1   8  -3 487.261 27.4441   2
  -1   8  -3 511.503 22.6717   1
   1   8   3 504.851 23.1075   3
   1   8   3 499.792 27.0565   2
   1   8   3 545.425 25.5077   1
   2  -8   3 21.1705 4.10139   1
  -2  -8  -3 17.7990 5.32287   1
   2  -8   3 14.2162 5.96807   3
  -2  -8  -3 16.0175 5.26136   2
   2  -8   3 14.3776 5.22575   2
  -2   8  -3 14.4446 6.01772   2
   2   8   3 30.1977 7.81622   2
   2   8   3 21.8482 5.92937   1
   2   8   3 21.0495 4.02396   3
  -2   8  -3 24.1384 4.71063   1
  -3  -8  -3 311.146 20.4790   2
   3  -8   3 321.730 21.4105   2
   3  -8   3 329.124 13.4918   1
   3  -8   3 320.977 23.5865   3
  -3  -8  -3 354.008 21.8361   1
  -3   8  -3 324.816 21.8493   2
   3   8   3 274.915 19.6499   1
   3   8   3 307.908 20.1570   2
  -3   8  -3 293.073 13.8483   1
  -4  -8  -3 3.40161 3.43856   1
   4  -8   3 0.93989 2.47157   2
  -4  -8  -3 3.54145 3.11323   2
   4  -8   3 0.32455 2.04705   3
   4  -8   3 5.56482 1.68499   1
  -4   8  -3 5.11611 3.66093   2
   4   8   3 5.04026 3.69064   2
   4   8   3 -1.9931 1.10959   1
  -5  -8  -3 62.8504 12.0073   1
  -5  -8  -3 47.3116 9.85225   2
   5  -8   3 81.6059 16.2556   3
   5  -8   3 55.4489 11.3784   2
   5   8   3 85.4342 14.8819   1
  -5   8  -3 91.0770 15.8775   2
   5   8   3 63.0431 11.5745   2
   6  -8   3 133.475 14.7433   2
  -6  -8  -3 89.8135 14.7410   1
   6  -8   3 104.036 6.17645   1
  -6  -8  -3 82.8157 12.7564   2
   6  -8   3 83.4328 17.7513   3
   6   8   3 121.093 12.9062   2
  -6   8  -3 113.508 17.1778   2
   6   8   3 117.889 17.6878   1
   7  -8   3 194.990 10.0946   1
   7  -8   3 191.947 10.0957   1
  -7  -8  -3 199.887 18.0376   2
   7  -8   3 225.470 19.8983   2
  -7  -8  -3 174.117 19.6165   1
   7  -8   3 205.377 23.0864   3
  -7   8  -3 217.261 19.8829   2
   7   8   3 208.234 17.8201   2
   8  -8   3 27.0098 4.78233   1
   8  -8   3 19.4154 7.65062   2
  -8  -8  -3 9.89276 5.77344   2
   8  -8   3 14.0403 3.50017   1
   8  -8   3 9.63728 7.09547   3
   8   8   3 17.7312 6.96143   2
   9  -8   3 21.6118 4.41316   1
  -9  -8  -3 15.9853 7.26701   2
   9  -8   3 6.78906 6.24282   3
   9  -8   3 10.3014 5.78108   2
   9  -8   3 20.3316 4.41919   1
   9   8   3 13.8217 6.50256   2
  10  -8   3 8.14718 3.14001   1
  10  -8   3 2.59974 4.93223   3
  10  -8   3 10.8255 7.02937   2
 -10  -8  -3 5.68635 4.75537   2
  10  -8   3 10.9896 3.48720   1
  10   8   3 -0.6711 2.30276   2
  11  -8   3 9.72136 3.60003   1
  11  -8   3 10.1083 5.90210   2
  11  -8   3 23.9077 9.23351   2
  11  -8   3 8.28378 10.3972   3
  11  -8   3 10.3232 3.56839   1
  11   8   3 6.17218 4.45873   2
  12  -8   3 -0.1731 2.80318   3
  12  -8   3 2.62361 4.20320   2
 -12  -9   3 14.9089 7.74015   1
  12  -9  -3 17.1339 6.86065   2
  12  -9  -3 15.4318 7.59792   2
  12  -9  -3 19.2498 10.0653   3
 -11  -9   3 528.023 30.9563   2
  11  -9  -3 529.711 32.1914   2
  11   9  -3 519.358 30.4501   2
  10  -9  -3 156.529 16.1979   2
 -10  -9   3 174.924 26.0050   1
  10  -9  -3 143.494 27.6924   3
 -10  -9   3 160.750 15.6937   2
  10   9  -3 156.241 15.2133   2
   9  -9  -3 179.011 29.4075   3
  -9  -9   3 159.581 15.4357   2
  -9  -9   3 114.809 19.8274   1
   9  -9  -3 172.936 16.6284   2
   9   9  -3 190.187 16.2561   2
  -9   9   3 164.195 17.0288   2
   8  -9  -3 107.948 22.3855   3
  -8  -9   3 134.323 21.6776   1
   8  -9  -3 150.649 15.1977   2
  -8  -9   3 151.146 14.7232   2
   8   9  -3 117.899 13.0051   2
  -8   9   3 128.806 14.9041   2
  -7  -9   3 273.992 20.0130   2
   7  -9  -3 254.870 26.1457   3
  -7  -9   3 255.176 24.8849   1
   7  -9  -3 315.829 22.0156   2
  -7   9   3 283.288 21.8177   2
   7   9  -3 283.672 20.0484   2
   6  -9  -3 61.3779 11.8992   2
  -6  -9   3 51.3226 10.3658   2
   6  -9  -3 20.6274 8.34049   3
  -6  -9   3 37.2592 9.82320   1
   6   9  -3 40.8199 10.7582   1
   6   9  -3 32.8460 8.13232   2
  -6   9   3 39.8315 11.7951   3
  -6   9   3 51.9700 11.4852   2
   5  -9  -3 0.84593 2.60292   2
  -5  -9   3 -1.3774 2.03570   2
  -5  -9   3 -1.5730 4.00417   1
   5  -9  -3 2.66201 3.85063   3
  -5   9   3 3.66991 3.60611   2
  -5   9   3 0.50694 3.48592   3
   5   9  -3 -4.6495 1.77516   1
   5   9  -3 -0.7798 2.41327   2
   4  -9  -3 225.050 20.1761   3
  -4  -9   3 235.183 19.2039   1
   4  -9  -3 250.435 18.1963   2
  -4  -9   3 211.639 16.6733   2
   4   9  -3 201.436 16.9325   2
  -4   9   3 252.415 18.5563   2
   4   9  -3 228.313 18.5102   1
  -4   9   3 223.675 20.1918   3
  -3  -9   3 11.2121 5.07398   1
   3  -9  -3 7.51114 4.05865   2
  -3  -9   3 11.4039 5.04312   2
   3  -9  -3 9.79616 5.43822   3
  -3  -9   3 10.9069 2.45115   3
   3   9  -3 10.8120 4.52021   1
  -3   9   3 11.1865 4.63738   2
  -3   9   3 7.15564 4.07297   3
  -2  -9   3 158.078 13.7111   1
   2  -9  -3 165.335 14.4640   2
   2  -9  -3 169.652 15.2052   3
  -2  -9   3 159.471 14.1500   2
  -2  -9   3 168.981 10.7140   3
  -2   9   3 160.348 15.7017   2
  -2   9   3 174.976 15.4832   3
  -2   9   3 178.310 9.35426   1
   2   9  -3 175.955 14.0614   1
  -2   9   3 171.339 9.97062   1
   1  -9  -3 641.083 35.6532   3
  -1  -9   3 715.312 35.0829   1
   1  -9  -3 692.795 33.7101   2
  -1  -9   3 668.262 33.7152   2
  -1  -9   3 751.963 30.8457   3
   1   9  -3 670.494 30.9141   1
  -1   9   3 663.841 28.3212   1
  -1   9   3 721.064 27.8803   1
  -1   9   3 681.437 33.1708   3
  -1   9   3 658.232 36.7505   2
   0  -9  -3 83.2882 13.3881   2
   0  -9  -3 78.1118 8.61584   3
   0  -9   3 68.6533 7.59184   1
   0  -9   3 87.5769 10.5613   2
   0  -9   3 91.5032 9.77186   3
   0   9   3 83.9442 12.7373   2
   0   9  -3 82.3216 12.5068   2
   0   9   3 73.3284 8.49850   3
   0   9   3 67.1136 7.43917   1
   0   9  -3 78.6195 8.07561   1
   1  -9   3 92.1755 10.7468   3
  -1  -9  -3 96.7857 10.8102   2
   1  -9   3 75.6642 7.27417   1
   1  -9   3 95.7205 14.4014   2
  -1  -9  -3 76.4490 7.65573   3
  -1   9  -3 102.885 11.3895   2
  -1   9  -3 87.3214 7.73476   1
   1   9   3 77.5097 8.60863   1
   1   9   3 63.1483 10.0738   2
   1   9   3 73.0479 7.50767   3
   2  -9   3 205.796 16.8276   2
   2  -9   3 162.032 15.9152   3
   2  -9   3 185.453 10.6111   1
  -2  -9  -3 182.792 15.5635   2
  -2  -9  -3 159.043 14.0393   1
  -2   9  -3 195.834 11.2442   1
   2   9   3 181.627 14.5241   1
   2   9   3 200.168 16.0794   2
  -2   9  -3 171.873 15.6543   2
   2   9   3 184.042 10.8136   3
   3  -9   3 39.3918 9.82079   2
  -3  -9  -3 39.5131 9.55338   1
   3  -9   3 43.1517 4.01706   1
  -3  -9  -3 28.5823 7.28378   2
   3  -9   3 21.7257 8.07149   3
  -3   9  -3 36.4450 4.17181   1
  -3   9  -3 47.0363 10.7434   2
   3   9   3 52.2653 11.1666   2
   3   9   3 40.0173 8.55813   1
  -4  -9  -3 48.3551 9.67222   2
   4  -9   3 79.1908 16.3569   3
   4  -9   3 58.9374 10.7270   2
  -4  -9  -3 66.6208 12.9471   1
  -4   9  -3 93.5305 15.7802   2
   4   9   3 62.7444 10.4680   2
   4   9   3 88.4496 14.6726   1
   5  -9   3 46.7314 13.7920   3
  -5  -9  -3 31.9597 9.60940   1
  -5  -9  -3 15.4702 6.00301   2
   5  -9   3 35.0757 9.54056   2
  -5   9  -3 27.6457 9.26245   2
   5   9   3 34.2376 9.98145   1
   5   9   3 15.8835 5.86408   2
  -6  -9  -3 14.8191 6.57243   2
   6  -9   3 11.4741 5.72790   2
  -6  -9  -3 14.6820 7.25315   1
   6  -9   3 9.54288 5.79005   3
   6   9   3 20.6978 7.26080   2
  -6   9  -3 6.68161 4.99065   2
   6   9   3 11.6567 5.60010   1
  -7  -9  -3 7.38195 6.90842   1
   7  -9   3 26.7581 8.69783   2
   7  -9   3 10.1118 7.17036   3
  -7  -9  -3 21.2031 7.92244   2
  -7   9  -3 26.0524 9.61358   2
   7   9   3 9.49900 5.10020   2
  -8  -9  -3 18.5959 7.38250   2
   8  -9   3 20.7454 7.77117   2
   8  -9   3 5.53517 5.89788   3
   8   9   3 10.7231 5.30835   2
  -8   9  -3 9.02452 5.88178   2
  -9  -9  -3 -3.4643 1.54034   2
   9  -9   3 1.29146 3.50916   3
   9  -9   3 -2.1178 2.61718   2
   9   9   3 -0.9444 1.67607   2
  10  -9   3 7.34601 6.59717   3
 -10  -9  -3 5.97531 5.12784   2
  10  -9   3 3.40325 5.07141   2
  10   9   3 4.52134 3.61865   2
 -11  -9  -3 81.9555 15.5607   2
  11  -9   3 82.8335 16.5103   2
  11  -9   3 55.6075 18.5370   3
  12  -9   3 13.7379 6.98584   2
  12 -10  -3 135.419 15.9243   2
 -11 -10   3 61.2363 17.5445   1
  11 -10  -3 36.6943 10.5347   2
 -11 -10   3 34.0686 8.89202   2
  11 -10  -3 20.8273 11.0164   3
  11  10  -3 33.3009 9.07892   2
  10 -10  -3 59.4612 17.6020   3
 -10 -10   3 37.4428 12.3150   1
 -10 -10   3 55.6680 11.4528   2
  10 -10  -3 53.7847 12.2509   2
  10  10  -3 45.0169 10.2096   2
  -9 -10   3 51.9767 11.5443   2
  -9 -10   3 34.5729 13.1210   1
   9 -10  -3 48.7644 11.7991   2
   9 -10  -3 42.3316 13.9176   3
   9  10  -3 49.1228 10.4408   2
  -9  10   3 74.3805 15.4788   2
  -8 -10   3 601.385 33.7809   2
   8 -10  -3 629.378 44.5811   3
  -8 -10   3 606.551 40.3570   1
   8 -10  -3 553.450 33.6290   2
   8  10  -3 639.283 33.9772   2
  -8  10   3 597.463 35.8968   2
   7 -10  -3 78.3886 18.0983   3
  -7 -10   3 123.210 21.1185   1
   7 -10  -3 123.328 17.5530   2
  -7 -10   3 97.9775 14.4888   2
  -7  10   3 107.147 18.0370   2
   7  10  -3 100.909 12.2000   2
  -6 -10   3 34.3890 11.4781   1
   6 -10  -3 10.2137 7.48867   3
  -6 -10   3 26.8808 7.69712   2
   6 -10  -3 41.2316 10.4318   2
   6  10  -3 24.2720 7.15754   2
  -6  10   3 5.24356 5.04895   3
   6  10  -3 19.7660 7.15524   1
  -6  10   3 19.9699 7.66152   2
  -5 -10   3 23.8625 8.68618   1
   5 -10  -3 31.0452 8.16366   2
   5 -10  -3 38.5314 10.9258   3
  -5 -10   3 24.8059 7.88294   2
   5  10  -3 25.8933 7.06475   2
  -5  10   3 36.2715 10.2942   3
   5  10  -3 24.0866 8.42472   1
  -5  10   3 30.5530 8.15122   2
  -4 -10   3 140.958 13.9948   2
   4 -10  -3 136.885 14.2498   2
  -4 -10   3 146.005 15.4141   1
   4 -10  -3 164.861 17.6139   3
   4  10  -3 141.339 14.7558   1
  -4  10   3 158.784 15.2590   2
   4  10  -3 155.276 14.4219   2
  -4  10   3 164.008 17.6562   3
  -3 -10   3 56.1110 11.3827   2
   3 -10  -3 46.6523 10.5260   2
  -3 -10   3 37.6504 3.84072   3
  -3 -10   3 31.4539 8.82968   1
   3 -10  -3 24.0175 8.44555   3
  -3  10   3 54.2375 11.6865   3
   3  10  -3 49.9176 10.6998   2
  -3  10   3 33.9601 8.60456   2
   3  10  -3 35.8078 8.27115   1
  -2 -10   3 395.909 23.1585   1
   2 -10  -3 370.035 23.6325   2
  -2 -10   3 359.447 18.0555   3
   2 -10  -3 340.718 23.6236   3
  -2 -10   3 343.796 22.9501   2
   2  10  -3 332.429 22.5958   2
   2  10  -3 391.217 26.4704   1
  -2  10   3 340.686 15.7924   1
  -2  10   3 396.170 17.5362   1
  -2  10   3 371.350 23.8028   2
  -1 -10   3 1480.61 57.8002   1
  -1 -10   3 1620.92 63.0150   2
   1 -10  -3 1512.54 60.1364   3
  -1 -10   3 1535.00 56.7498   3
   1 -10  -3 1559.06 61.8307   2
  -1  10   3 1532.40 60.5671   3
   1  10  -3 1548.33 58.0166   1
   1  10  -3 1414.68 60.5394   2
  -1  10   3 1493.82 61.2267   2
  -1  10   3 1496.69 54.5566   1
  -1  10   3 1541.83 53.5990   1
   0 -10   3 878.740 41.7125   2
   0 -10   3 835.984 38.5975   3
   0 -10  -3 957.246 42.0554   2
   0 -10  -3 893.149 38.1071   3
   0 -10   3 859.488 36.2312   1
   0  10  -3 856.209 41.2201   2
   0  10   3 854.382 40.8395   2
   0  10   3 841.081 37.6543   3
   0  10  -3 832.342 35.9099   1
   0  10   3 877.720 35.8818   1
  -1 -10  -3 -0.1276 1.75352   2
   1 -10   3 5.55746 4.09021   3
   1 -10   3 2.43358 3.41606   2
  -1 -10  -3 1.06065 1.91936   3
   1 -10   3 -0.0055 1.47913   1
   1  10   3 2.19888 2.47171   3
   1  10   3 -0.9509 2.01029   2
  -1  10  -3 -0.5674 1.85011   2
   1  10   3 1.71313 2.53313   1
  -1  10  -3 2.67225 2.19530   1
  -2 -10  -3 48.2850 10.0842   1
   2 -10   3 26.4745 7.70162   3
   2 -10   3 25.1858 7.46615   2
   2 -10   3 35.5500 5.95555   1
  -2 -10  -3 38.7151 9.19647   2
   2  10   3 37.3340 8.71767   1
  -2  10  -3 41.3151 6.33743   1
  -2  10  -3 36.6157 9.86479   2
   2  10   3 33.5423 5.72928   3
   2  10   3 50.1131 10.9975   2
   3 -10   3 544.039 34.0511   3
   3 -10   3 568.788 32.3989   2
   3 -10   3 553.856 21.0494   1
  -3 -10  -3 541.513 30.8745   1
  -3 -10  -3 532.080 30.9630   2
  -3  10  -3 533.849 21.6404   1
  -3  10  -3 574.446 32.9018   2
   3  10   3 569.301 30.8912   1
   3  10   3 534.977 30.8515   2
  -4 -10  -3 490.234 29.6090   2
   4 -10   3 522.314 34.3442   3
  -4 -10  -3 485.958 30.2716   1
   4 -10   3 459.912 29.7784   2
   4  10   3 469.920 28.9552   2
  -4  10  -3 482.954 30.6978   2
   4  10   3 503.444 30.1827   1
   5 -10   3 43.8356 12.0393   3
  -5 -10  -3 51.0910 11.3603   2
  -5 -10  -3 63.8396 14.2189   1
   5 -10   3 57.7718 12.9020   2
  -5  10  -3 36.5174 10.0439   2
   5  10   3 53.5348 11.6152   2
   5  10   3 49.0227 12.2107   1
  -6 -10  -3 17.8434 7.09531   1
   6 -10   3 35.8296 9.49512   2
   6 -10   3 23.9284 9.14757   3
  -6 -10  -3 26.4201 7.84428   2
   6  10   3 21.0357 9.59821   1
  -6  10  -3 19.1568 7.78120   2
   6  10   3 52.3585 11.2760   2
  -7 -10  -3 3.46599 6.01635   1
   7 -10   3 -0.1045 2.67071   2
   7 -10   3 4.72862 5.84349   3
  -7 -10  -3 -1.3346 2.53518   2
   7  10   3 0.11565 2.70790   2
  -7  10  -3 1.07087 2.78565   2
   8 -10   3 3.47326 5.39364   3
  -8 -10  -3 16.9824 7.79902   2
   8  10   3 -1.5195 2.12443   2
  -8  10  -3 5.65152 4.87586   2
   9 -10   3 1.96651 4.00276   2
   9 -10   3 9.99626 8.20034   3
  -9 -10  -3 -1.3471 2.42091   2
   9  10   3 10.7686 6.48369   2
  10 -10   3 19.9435 8.34323   2
 -10 -10  -3 14.2610 6.92414   2
  10 -10   3 9.69634 8.87553   3
  10  10   3 35.5087 10.6538   2
  11 -10   3 11.6814 6.72924   2
  11 -10   3 8.58151 8.05312   3
 -11 -10  -3 3.84234 4.21940   2
  12 -10   3 28.6575 10.9877   2
  12 -11  -3 15.6076 7.36032   2
 -11 -11   3 61.2155 12.7178   2
 -11 -11   3 63.7566 18.2242   1
  11 -11  -3 80.2863 23.2365   3
  11 -11  -3 63.9282 14.1892   2
  11  11  -3 41.5619 16.0689   2
  10 -11  -3 13.1869 12.9880   3
 -10 -11   3 18.1091 7.00779   2
 -10 -11   3 4.81260 6.05831   1
 -10  11   3 0.79108 2.44436   2
  10  11  -3 12.0717 6.00309   2
   9 -11  -3 153.263 16.8370   2
  -9 -11   3 135.254 22.4802   1
  -9 -11   3 172.806 17.2434   2
   9 -11  -3 148.650 28.2330   3
  -9  11   3 140.152 16.9846   2
   9  11  -3 129.491 14.8846   2
  -8 -11   3 141.475 22.2257   1
   8 -11  -3 134.864 23.2595   3
   8 -11  -3 173.776 17.9077   2
  -8 -11   3 177.576 17.5564   2
  -8  11   3 151.630 17.4500   2
   8  11  -3 164.537 16.5172   2
   7 -11  -3 40.7177 10.6259   2
   7 -11  -3 27.7797 10.8824   3
  -7 -11   3 17.3822 6.94741   2
  -7 -11   3 31.7421 10.3410   1
   7  11  -3 42.9601 10.5108   2
   7  11  -3 15.4073 8.19784   1
  -7  11   3 22.3987 8.65065   2
   6 -11  -3 86.0087 15.1835   2
  -6 -11   3 70.8090 12.2902   2
   6 -11  -3 61.6428 17.0812   3
  -6 -11   3 49.5771 19.3116   1
   6  11  -3 42.7513 12.4013   1
  -6  11   3 71.9269 13.6181   2
   6  11  -3 68.7986 12.4079   2
  -6  11   3 75.8580 19.7403   3
  -5 -11   3 75.0087 13.0288   2
   5 -11  -3 83.3595 14.7032   2
   5 -11  -3 65.8076 14.4589   3
  -5 -11   3 70.7192 15.1674   1
   5  11  -3 61.9918 12.5767   1
  -5  11   3 92.0483 19.2785   3
  -5  11   3 87.5231 15.2844   2
   5  11  -3 60.3377 11.8485   2
   4 -11  -3 11.3555 5.68451   2
   4 -11  -3 7.08253 5.84285   3
  -4 -11   3 7.36798 4.49779   2
  -4 -11   3 20.4112 7.66382   1
   4  11  -3 12.3905 5.79193   1
  -4  11   3 11.7342 5.63547   2
   4  11  -3 13.5433 8.00005   2
  -4  11   3 12.4921 7.06510   3
  -3 -11   3 290.658 21.2726   1
  -3 -11   3 265.708 20.4614   2
   3 -11  -3 206.626 18.7685   2
   3 -11  -3 278.042 22.7513   3
  -3 -11   3 262.506 12.3044   3
  -3  11   3 246.060 20.2888   2
  -3  11   3 266.094 22.2234   3
   3  11  -3 275.550 20.2962   1
   3  11  -3 283.789 20.8631   2
   2 -11  -3 591.231 32.8889   3
   2 -11  -3 584.279 32.2558   2
  -2 -11   3 512.539 30.7948   2
  -2 -11   3 524.020 29.6906   1
  -2 -11   3 566.367 25.0721   3
  -2  11   3 527.409 23.4712   1
   2  11  -3 555.886 29.7130   1
  -2  11   3 577.725 22.8700   1
  -2  11   3 523.049 31.1701   2
   2  11  -3 559.099 31.5670   2
  -2  11   3 547.438 32.2278   3
  -1 -11   3 1570.97 59.3932   3
   1 -11  -3 1640.70 65.5129   2
  -1 -11   3 1544.95 65.2008   2
   1 -11  -3 1640.16 63.9098   3
  -1 -11   3 1513.18 60.4695   1
   1  11  -3 1576.76 65.1214   2
  -1  11   3 1620.30 57.8227   1
  -1  11   3 1565.06 63.4969   3
   1  11  -3 1549.96 60.5100   1
  -1  11   3 1528.73 64.5120   2
  -1  11   3 1645.58 56.5170   1
   0 -11  -3 338.158 23.2301   2
   0 -11   3 317.727 23.2389   2
   0 -11   3 314.947 18.8703   1
   0 -11  -3 325.206 23.2552   3
   0 -11   3 310.124 20.9216   3
   0  11  -3 321.091 19.0638   1
   0  11   3 306.394 22.5370   2
   0  11   3 319.565 18.7707   1
   0  11   3 361.139 21.4729   3
   0  11  -3 298.870 22.4876   2
   1 -11   3 30.9834 8.31295   3
   1 -11   3 37.4996 7.19498   1
  -1 -11  -3 34.6552 9.47475   2
   1 -11   3 39.1254 10.4463   2
  -1 -11  -3 41.6303 8.02894   3
   1  11   3 39.6689 7.83356   3
  -1  11  -3 45.9851 10.8319   2
   1  11   3 41.2119 8.73461   1
   1  11   3 44.2210 9.90659   2
  -1  11  -3 40.3672 7.12733   1
  -2 -11  -3 189.134 17.3860   2
  -2 -11  -3 190.591 11.8979   3
   2 -11   3 167.712 17.0013   2
   2 -11   3 173.429 11.1449   1
  -2 -11  -3 185.846 16.3026   1
   2 -11   3 187.754 18.0803   3
   2  11   3 177.438 16.6598   2
  -2  11  -3 162.289 11.1228   1
  -2  11  -3 160.865 16.6570   2
   2  11   3 210.639 16.6143   1
   3 -11   3 558.468 34.0603   3
   3 -11   3 437.048 29.3805   2
  -3 -11  -3 419.111 28.3115   2
   3 -11   3 461.369 18.6338   1
  -3 -11  -3 447.939 28.4881   1
  -3  11  -3 460.890 19.3047   1
  -3  11  -3 486.737 30.7698   2
   3  11   3 404.296 26.8327   1
   3  11   3 435.712 28.4712   2
   4 -11   3 1666.39 74.8449   3
   4 -11   3 1569.67 69.3191   2
  -4 -11  -3 1637.10 68.8734   2
  -4 -11  -3 1737.54 70.6123   1
  -4  11  -3 1703.35 71.5594   2
   4  11   3 1660.96 69.0629   1
   4  11   3 1570.24 68.1004   2
   5 -11   3 351.666 30.0249   3
  -5 -11  -3 365.436 26.3008   2
   5 -11   3 414.399 28.4672   2
  -5 -11  -3 338.752 26.6472   1
   5  11   3 412.596 28.3792   1
   5  11   3 352.833 25.7717   2
  -5  11  -3 346.201 26.9320   2
  -6 -11  -3 54.8736 12.8657   2
   6 -11   3 32.0754 9.42877   2
  -6 -11  -3 40.1886 10.9391   1
   6 -11   3 22.4540 10.1865   3
  -6  11  -3 42.2553 10.6857   2
   6  11   3 46.0252 11.2364   2
   7 -11   3 32.5008 11.4208   3
  -7 -11  -3 42.7872 11.2544   2
   7  11   3 26.8995 9.48796   2
  -7  11  -3 26.4404 9.40126   2
   8 -11   3 41.2969 14.8220   3
   8 -11   3 34.8503 11.0821   2
  -8 -11  -3 43.7869 11.7756   2
   8  11   3 35.8675 10.1281   2
   9 -11   3 46.2271 16.5650   3
   9 -11   3 53.6053 15.4247   2
  -9 -11  -3 47.4900 12.1988   2
   9  11   3 67.6263 13.9400   2
  10 -11   3 195.547 35.5788   3
  10 -11   3 124.658 21.8827   2
 -10 -11  -3 156.385 18.8805   2
 -11 -11  -3 47.4154 12.8426   2
  11 -11   3 111.313 20.6707   2
  11 -12  -3 2.16413 3.02437   2
 -11 -12   3 2.77820 3.87738   2
  11  12  -3 -0.6352 2.80500   2
  10 -12  -3 21.1780 11.6891   3
  10 -12  -3 21.9179 8.31578   2
 -10 -12   3 26.1362 10.6855   2
 -10 -12   3 11.9376 7.99276   1
  10  12  -3 15.7864 6.81749   2
 -10  12   3 6.62757 8.09455   2
   9 -12  -3 0.83347 4.10703   3
  -9 -12   3 0.35012 3.16750   1
  -9 -12   3 6.99236 4.80003   2
   9 -12  -3 5.42392 3.96246   2
   9  12  -3 0.64302 2.50057   2
  -8 -12   3 38.1524 10.9423   2
  -8 -12   3 15.5968 8.09953   1
   8 -12  -3 38.4667 15.1429   3
   8 -12  -3 34.2908 10.7448   2
   8  12  -3 24.7513 8.97762   2
   7 -12  -3 137.576 22.8969   3
   7 -12  -3 179.626 18.7961   2
  -7 -12   3 162.140 24.9748   1
  -7 -12   3 188.282 18.4070   2
  -7  12   3 159.600 18.2226   2
   7  12  -3 165.777 17.0054   2
  -6 -12   3 199.009 18.5834   2
   6 -12  -3 185.445 18.5816   2
   6 -12  -3 190.884 22.5458   3
  -6 -12   3 192.216 20.6924   1
   6  12  -3 195.443 18.1517   2
  -6  12   3 191.109 19.2478   2
   5 -12  -3 47.1529 12.5391   3
   5 -12  -3 53.5413 11.7067   2
  -5 -12   3 44.0869 12.2148   1
  -5 -12   3 57.7132 12.0147   2
  -5  12   3 47.6270 11.3394   2
  -5  12   3 47.6082 13.0344   3
   5  12  -3 40.0472 11.0835   1
   5  12  -3 66.2693 13.2577   2
   4 -12  -3 -2.7931 4.01749   3
  -4 -12   3 8.88476 5.41620   2
  -4 -12   3 -2.6839 2.12095   1
   4 -12  -3 12.6366 6.56059   2
   4  12  -3 9.29196 5.52225   2
  -4  12   3 3.57536 3.90688   3
  -4  12   3 2.18907 3.72585   2
   4  12  -3 1.81274 3.19804   1
  -3 -12   3 171.328 16.4651   1
  -3 -12   3 119.201 14.4896   2
   3 -12  -3 172.408 17.2841   2
   3 -12  -3 168.896 18.3808   3
  -3 -12   3 153.182 9.12007   3
   3  12  -3 166.746 15.9564   1
  -3  12   3 179.032 17.5922   2
   3  12  -3 158.816 16.2128   2
  -3  12   3 160.189 17.4095   3
  -2 -12   3 557.885 25.7037   3
   2 -12  -3 515.489 32.0845   3
  -2 -12   3 550.032 30.8368   1
   2 -12  -3 567.714 33.2898   2
  -2 -12   3 483.619 31.2712   2
  -2  12   3 566.099 23.3577   1
  -2  12   3 531.351 32.6787   3
  -2  12   3 549.479 24.3539   1
   2  12  -3 584.215 30.8597   1
  -2  12   3 536.173 32.6611   2
   2  12  -3 571.392 32.9706   2
  -1 -12   3 938.214 41.0143   3
   1 -12  -3 934.059 44.6226   3
   1 -12  -3 969.502 46.8289   2
  -1 -12   3 908.253 42.2997   1
  -1 -12   3 1008.17 48.0352   2
  -1  12   3 936.114 39.3736   1
   1  12  -3 975.943 42.7044   1
  -1  12   3 938.353 46.6244   2
   1  12  -3 989.875 47.4513   2
  -1  12   3 997.025 38.5117   1
   0 -12  -3 126.592 18.9096   2
   0 -12   3 100.081 15.1359   3
   0 -12  -3 95.1876 11.0632   3
   0 -12   3 87.9245 14.4179   2
   0 -12   3 98.8553 10.6356   1
   0  12   3 129.888 14.3417   2
   0  12  -3 96.1592 15.7164   2
   0  12   3 109.778 11.9838   3
   0  12  -3 128.134 11.5279   1
   0  12   3 113.285 10.7439   1
  -1 -12  -3 0.12831 2.72582   2
   1 -12   3 3.00336 3.79086   2
   1 -12   3 -0.3224 2.61974   3
  -1 -12  -3 -0.6471 1.71998   3
   1 -12   3 2.01187 2.25692   1
  -1  12  -3 -0.3179 1.38026   2
   1  12   3 0.26254 2.32997   1
   1  12   3 -1.1294 1.19778   2
  -1  12  -3 3.25044 2.58949   1
  -2 -12  -3 26.0197 8.76836   2
   2 -12   3 12.2420 6.54201   3
   2 -12   3 11.5039 3.78799   1
   2 -12   3 2.27332 3.95011   2
  -2 -12  -3 25.9586 5.80361   3
  -2  12  -3 14.5980 4.43814   1
  -2  12  -3 8.22249 5.48974   2
   2  12   3 11.4362 5.18467   2
   2  12   3 17.0926 7.19936   1
   3 -12   3 1860.51 58.9122   1
   3 -12   3 1724.45 74.7222   2
  -3 -12  -3 1749.91 74.0494   2
  -3 -12  -3 1872.55 73.9470   1
   3 -12   3 1832.05 77.9771   3
   3  12   3 1854.88 72.7255   1
   3  12   3 1695.96 72.9773   2
  -3  12  -3 1716.98 59.0466   1
  -3  12  -3 1736.85 75.0959   2
  -4 -12  -3 598.765 35.3929   2
  -4 -12  -3 592.150 35.5692   1
   4 -12   3 582.404 36.1119   2
   4 -12   3 539.958 37.6664   3
   4  12   3 525.688 33.4574   1
  -4  12  -3 536.160 35.2098   2
   4  12   3 592.637 35.1369   2
  -5 -12  -3 273.058 22.9576   2
  -5 -12  -3 257.663 23.4890   1
   5 -12   3 245.960 25.4693   3
   5 -12   3 241.324 22.3792   2
  -5  12  -3 209.135 21.3882   2
   5  12   3 266.576 22.4562   2
  -6 -12  -3 11.3326 7.34849   2
   6 -12   3 9.69338 6.17493   2
  -6 -12  -3 8.79021 6.88648   1
   6 -12   3 -0.3080 4.89494   3
  -6  12  -3 3.08226 4.63506   2
   6  12   3 0.18731 2.07726   2
   7 -12   3 1.46685 4.92547   3
   7 -12   3 0.36629 2.67268   2
  -7 -12  -3 4.28177 4.71788   2
   7  12   3 6.80903 4.85737   2
  -8 -12  -3 22.2778 9.75206   2
   8 -12   3 32.9444 12.3439   3
   8 -12   3 43.4267 12.4019   2
   8  12   3 37.6293 11.8143   2
  -9 -12  -3 48.5056 12.7439   2
   9 -12   3 42.0188 14.2598   3
   9 -12   3 58.0218 15.4103   2
  10 -12   3 66.9108 20.9761   3
  10 -12   3 88.3167 17.2253   2
 -10 -12  -3 71.9507 16.3220   2
  11 -12   3 114.049 21.7333   2
 -11 -12  -3 102.571 19.8692   2
 -11 -13   3 10.6501 6.21743   2
  11 -13  -3 1.36943 3.58039   2
  10 -13  -3 -1.1476 4.76412   3
 -10 -13   3 4.06213 6.12860   1
  10 -13  -3 9.49075 6.26712   2
 -10 -13   3 1.80993 3.51886   2
  10  13  -3 3.74464 4.34950   2
   9 -13  -3 3.84712 4.60891   2
  -9 -13   3 3.48526 4.12342   2
   9  13  -3 4.70554 4.75901   2
  -9  13   3 0.53928 2.82595   2
  -8 -13   3 295.612 28.5482   1
   8 -13  -3 281.448 24.7762   2
  -8 -13   3 295.091 28.3793   2
   8 -13  -3 262.032 29.9211   3
   8  13  -3 274.260 23.5191   2
   7 -13  -3 481.985 39.6576   3
  -7 -13   3 459.555 35.6374   1
  -7 -13   3 482.989 32.6058   2
   7 -13  -3 519.193 34.2431   2
   6 -13  -3 51.3738 11.9380   2
  -6 -13   3 44.2168 12.3620   1
   6 -13  -3 64.9760 16.9591   3
  -6 -13   3 67.7822 13.6744   2
   6  13  -3 50.0952 11.7246   2
   6  13  -3 32.6834 9.47278   1
  -5 -13   3 0.73032 3.40819   2
   5 -13  -3 1.88519 4.64865   3
   5 -13  -3 -1.9911 1.87324   2
  -5 -13   3 -2.3371 3.08719   1
  -5  13   3 -0.7124 1.58962   2
   5  13  -3 1.19135 1.85021   1
   5  13  -3 5.59699 4.08734   2
   4 -13  -3 56.8322 12.9919   2
   4 -13  -3 56.1860 15.1725   3
  -4 -13   3 74.0428 14.2621   2
  -4 -13   3 52.0823 12.5334   1
  -4  13   3 75.2921 16.1121   2
   4  13  -3 56.6158 11.6452   2
   4  13  -3 57.6613 12.8118   1
   3 -13  -3 5.20871 5.25523   2
  -3 -13   3 19.6410 7.42784   2
   3 -13  -3 8.34029 6.40025   3
  -3 -13   3 10.5209 3.01689   3
  -3 -13   3 12.7607 6.13899   1
   3  13  -3 7.75847 5.37157   2
  -3  13   3 8.96125 6.53004   2
   3  13  -3 17.1982 6.90734   1
  -2 -13   3 3.30287 4.00804   1
   2 -13  -3 0.48619 4.12306   3
   2 -13  -3 -5.6630 1.67065   2
  -2 -13   3 1.82627 2.35248   3
  -2 -13   3 -2.2817 3.00258   2
  -2  13   3 1.93071 2.12404   1
   2  13  -3 -0.7484 3.15847   2
   2  13  -3 1.59713 3.23563   1
  -2  13   3 11.7260 4.65050   1
  -2  13   3 -0.7661 3.82351   2
  -2  13   3 -2.3416 1.88349   3
   1 -13  -3 137.065 19.8860   2
   1 -13  -3 124.620 18.2815   3
  -1 -13   3 98.1191 15.0014   1
  -1 -13   3 79.6261 14.1874   2
  -1 -13   3 111.133 16.8713   3
  -1  13   3 120.990 10.4160   1
  -1  13   3 91.4042 16.0296   2
  -1  13   3 111.779 10.8956   1
   1  13  -3 100.175 11.7664   1
   1  13  -3 117.056 18.2572   2
   0 -13   3 249.117 17.9798   1
   0 -13   3 314.020 24.6399   2
   0 -13  -3 273.003 19.7527   3
   0 -13  -3 241.583 21.6143   2
   0 -13   3 277.308 20.5369   3
   0  13   3 290.922 18.4454   1
   0  13  -3 289.780 18.7088   1
   0  13  -3 234.547 21.4632   2
   0  13   3 217.234 20.3770   2
   1 -13   3 90.5700 13.0101   1
  -1 -13  -3 74.4486 9.23286   3
   1 -13   3 91.8532 15.7047   3
  -1 -13  -3 82.1726 15.1872   2
   1 -13   3 130.240 19.8861   2
  -1  13  -3 86.5140 15.9617   2
   1  13   3 59.8045 12.7557   2
   1  13   3 103.996 14.6273   1
  -1  13  -3 107.502 10.0327   1
  -2 -13  -3 143.665 11.2676   3
   2 -13   3 171.427 18.3840   2
  -2 -13  -3 147.644 16.7725   2
   2 -13   3 154.318 11.2781   1
   2 -13   3 173.498 18.1161   3
  -2  13  -3 166.879 17.9108   2
   2  13   3 129.073 14.2227   1
   2  13   3 152.264 16.8672   2
  -2  13  -3 151.931 11.1884   1
   3 -13   3 5.63067 2.95111   1
   3 -13   3 3.08240 4.22270   2
   3 -13   3 1.56398 3.15997   3
  -3 -13  -3 6.43369 5.37608   2
   3  13   3 -2.1379 2.18976   1
  -3  13  -3 6.01982 4.47193   2
   3  13   3 11.0670 6.66608   2
  -3  13  -3 3.43938 2.40562   1
  -4 -13  -3 615.169 37.2823   1
   4 -13   3 656.203 41.7243   3
  -4 -13  -3 624.176 37.4610   2
  -4  13  -3 551.800 41.5136   2
   4  13   3 556.633 35.0803   1
  -5 -13  -3 55.2541 13.3601   2
   5 -13   3 76.6035 17.0214   3
  -5 -13  -3 61.4885 13.2209   1
   5 -13   3 86.7256 17.8893   2
   5  13   3 49.0471 11.6619   2
  -6 -13  -3 14.1822 7.60810   2
   6 -13   3 22.1802 9.19496   2
   6 -13   3 6.82943 7.89738   3
  -6  13  -3 17.9364 9.18671   2
   6  13   3 22.9734 9.12522   2
  -7 -13  -3 -2.3976 2.30291   2
   7 -13   3 0.46372 4.88529   3
   7 -13   3 -0.0367 2.16365   2
   7  13   3 5.27774 5.58498   2
   8 -13   3 -2.1462 1.97426   2
  -8 -13  -3 8.59323 6.22811   2
   8 -13   3 7.74425 7.53597   3
   9 -13   3 413.038 40.6138   3
   9 -13   3 389.562 32.3616   2
  -9 -13  -3 332.186 29.4407   2
  10 -13   3 218.511 24.7549   2
 -10 -13  -3 301.169 27.8901   2
  11 -13   3 9.53275 8.15109   2
 -10 -14   3 13.6171 7.16209   2
  10 -14  -3 19.8903 8.99802   2
   9 -14  -3 39.5820 11.4125   2
  -9 -14   3 24.6972 11.0029   1
   9 -14  -3 54.9176 17.6800   3
  -9 -14   3 39.7604 12.4782   2
  -8 -14   3 33.0730 12.3509   1
   8 -14  -3 30.4363 13.0453   3
  -8 -14   3 42.5645 12.0807   2
   8 -14  -3 56.6628 14.8600   2
   8  14  -3 34.5447 10.8850   2
  -7 -14   3 596.377 41.5453   1
   7 -14  -3 577.157 38.1604   2
   7 -14  -3 580.757 44.7601   3
  -7 -14   3 608.728 38.3858   2
   7  14  -3 606.309 37.8416   2
  -7  14   3 570.798 39.3514   2
   6 -14  -3 150.746 18.2580   2
   6 -14  -3 205.584 31.5541   3
  -6 -14   3 150.893 23.0507   1
  -6 -14   3 127.702 21.3158   2
   6  14  -3 128.402 20.2079   2
  -5 -14   3 87.6871 18.8611   1
   5 -14  -3 101.322 18.7324   3
   5 -14  -3 141.618 22.0023   2
   5  14  -3 133.613 20.3793   2
  -4 -14   3 76.8701 15.0720   1
  -4 -14   3 83.5167 16.4850   2
   4 -14  -3 119.191 21.5489   3
   4 -14  -3 72.3095 16.9875   2
   4  14  -3 58.3601 15.6354   1
  -3 -14   3 60.2433 13.1686   1
   3 -14  -3 68.6488 15.1995   3
  -3 -14   3 64.3228 14.6048   2
   3 -14  -3 52.7816 15.3851   2
  -3 -14   3 70.7365 6.20334   3
   3  14  -3 83.2579 15.1310   1
  -3  14   3 33.2082 13.8050   2
   3  14  -3 55.0400 13.5528   2
   2 -14  -3 61.8740 13.5595   2
   2 -14  -3 70.6859 14.1056   3
  -2 -14   3 59.3182 9.42630   3
  -2 -14   3 60.5078 14.3011   2
  -2 -14   3 79.0205 14.0912   1
  -2  14   3 66.2911 6.92271   1
  -2  14   3 63.9807 9.29399   1
   2  14  -3 67.7439 13.7307   1
   2  14  -3 58.8978 12.7953   2
   1 -14  -3 86.3901 15.2047   3
  -1 -14   3 82.8106 12.7354   3
   1 -14  -3 64.4800 14.3327   2
  -1 -14   3 53.3910 13.2473   2
  -1 -14   3 78.0330 13.3364   1
  -1  14   3 69.5809 10.1401   1
   1  14  -3 79.6328 15.4879   2
  -1  14   3 67.3139 11.0303   1
   1  14  -3 72.2752 12.4276   1
  -1  14   3 67.3149 16.3811   2
   0 -14  -3 41.8246 11.8831   2
   0 -14   3 25.8871 8.60544   2
   0 -14   3 36.7617 10.2817   3
   0 -14   3 42.4591 9.44277   1
   0 -14  -3 43.8046 10.5353   3
   0  14  -3 25.8582 7.17507   1
   0  14   3 43.2270 8.84562   1
   1 -14   3 71.9353 15.9838   2
   1 -14   3 77.8612 11.7410   1
  -1 -14  -3 78.8618 12.1180   3
  -1 -14  -3 86.3162 16.7541   2
   1 -14   3 78.8232 14.8641   3
  -1  14  -3 75.5893 8.85236   1
   1  14   3 78.8696 13.4327   1
  -2 -14  -3 108.439 9.94853   3
   2 -14   3 114.938 9.86137   1
   2 -14   3 131.027 16.1186   3
   2 -14   3 173.509 32.1278   2
  -2  14  -3 105.261 9.44252   1
   2  14   3 74.7032 14.3083   2
   2  14   3 103.905 15.9475   1
   3 -14   3 206.907 11.5890   1
  -3 -14  -3 248.548 22.7530   2
   3 -14   3 233.429 22.6599   2
   3 -14   3 187.550 20.9191   3
   3  14   3 185.906 18.3014   1
   3  14   3 227.046 21.5491   2
  -3  14  -3 209.019 11.9002   1
  -4 -14  -3 132.798 22.0344   2
   4 -14   3 102.072 17.9571   2
   4  14   3 146.320 25.8523   1
   4  14   3 135.836 21.5745   2
   5 -14   3 23.2453 9.23149   2
  -5 -14  -3 18.3250 7.97937   2
   5 -14   3 22.2093 9.48225   3
   5  14   3 21.1910 8.49244   1
   5  14   3 28.5914 10.0036   2
  -5  14  -3 3.98162 4.68797   2
  -6 -14  -3 9.43878 6.06143   2
   6 -14   3 26.1190 11.7528   3
   6 -14   3 11.1622 7.13651   2
  -7 -14  -3 -3.2984 2.19424   2
   7 -14   3 -0.7830 2.44106   2
   7 -14   3 -1.1896 2.37771   3
   8 -14   3 5.06707 7.04189   3
   8 -14   3 2.93360 4.64586   2
  -8 -14  -3 9.97191 6.57164   2
   9 -14   3 138.866 24.8747   2
  -9 -14  -3 104.812 20.6796   2
   9 -14   3 94.1868 21.9994   3
  10 -14   3 105.092 21.4758   2
 -10 -14  -3 100.747 18.7096   2
 -10 -15   3 1.24872 4.13588   2
  10 -15  -3 0.35914 3.65876   2
   9 -15  -3 0.38639 5.18203   3
  -9 -15   3 5.42715 4.95834   2
   9 -15  -3 2.86056 3.46535   2
  -9 -15   3 3.61612 6.60945   1
   8 -15  -3 157.630 25.0441   2
  -8 -15   3 194.536 21.2460   2
   8 -15  -3 148.101 34.4386   3
  -8 -15   3 168.670 28.6054   1
  -7 -15   3 93.0002 18.1309   2
   7 -15  -3 99.1220 18.4246   2
  -7 -15   3 111.910 21.4513   1
   7 -15  -3 105.914 24.6844   3
   6 -15  -3 404.450 35.3729   3
   6 -15  -3 407.011 31.4170   2
  -6 -15   3 370.892 31.5034   1
  -6 -15   3 401.459 30.9301   2
   6  15  -3 306.313 31.1353   2
  -5 -15   3 549.006 37.7897   1
   5 -15  -3 495.281 38.5160   3
  -5 -15   3 533.684 36.2541   2
   5 -15  -3 541.499 36.4554   2
  -5  15   3 544.070 46.9553   2
   5  15  -3 489.434 34.5209   2
   4 -15  -3 56.3936 14.5729   2
  -4 -15   3 64.6957 14.3127   2
  -4 -15   3 69.3852 15.7105   1
   4 -15  -3 59.0743 14.8554   3
  -4  15   3 35.1952 10.6858   2
   4  15  -3 40.4562 11.2664   2
   3 -15  -3 13.4378 7.55359   2
  -3 -15   3 24.4597 4.55162   3
  -3 -15   3 16.6385 7.25175   1
  -3 -15   3 16.5278 7.99329   2
   3 -15  -3 24.6661 9.86281   3
   3  15  -3 29.2429 9.66595   2
   3  15  -3 23.8579 8.34946   1
  -2 -15   3 72.4800 13.3540   1
  -2 -15   3 80.5466 9.04458   3
   2 -15  -3 60.1065 14.1650   2
  -2 -15   3 49.7682 11.8309   2
   2 -15  -3 75.1107 14.8259   3
   2  15  -3 75.8820 15.6126   2
  -2  15   3 95.1042 9.20137   1
  -2  15   3 80.0886 7.81734   1
   2  15  -3 99.7186 16.0765   1
  -1 -15   3 -2.8279 3.25893   2
   1 -15  -3 2.61607 3.83596   3
  -1 -15   3 6.49419 4.28519   3
   1 -15  -3 3.14534 5.52401   2
  -1 -15   3 0.78423 2.67876   1
  -1  15   3 -1.5304 2.30733   1
   1  15  -3 2.56192 3.87724   1
  -1  15   3 9.87670 4.26007   1
   1  15  -3 0.46626 2.00649   2
   0 -15   3 3.27877 4.06112   3
   0 -15  -3 14.1735 6.24731   3
   0 -15  -3 18.9834 8.33637   2
   0 -15   3 11.5863 5.43971   1
   0 -15   3 10.9992 6.73940   2
   0  15   3 13.3034 5.92641   1
   0  15  -3 5.44859 3.68608   1
   1 -15   3 1.62723 3.60262   3
  -1 -15  -3 7.81977 5.95645   2
   1 -15   3 5.03334 3.71454   1
   1 -15   3 4.17656 3.76513   2
  -1 -15  -3 1.41333 3.06949   3
  -1  15  -3 4.22856 3.31767   1
   1  15   3 0.40858 2.51869   1
   2 -15   3 4.72534 4.29190   2
   2 -15   3 12.3780 4.38725   1
  -2 -15  -3 10.2256 3.96127   3
   2 -15   3 2.96356 4.35427   3
  -2 -15  -3 11.7225 7.30516   2
  -2  15  -3 -0.3673 1.53812   2
   2  15   3 9.08707 5.49888   1
   2  15   3 20.0769 8.80284   2
  -2  15  -3 12.3327 4.29803   1
  -3 -15  -3 1.92219 4.37904   2
   3 -15   3 4.43341 4.98492   2
   3 -15   3 -1.4174 2.53348   3
  -3  15  -3 0.13523 3.22771   2
   3  15   3 -0.5355 1.51750   2
  -3  15  -3 2.75062 1.82372   1
   3  15   3 1.30165 2.69058   1
   4 -15   3 6.85309 5.04490   2
  -4 -15  -3 11.4208 7.24052   2
   4 -15   3 14.1833 8.33600   3
   5 -15   3 19.1280 9.29621   2
   5 -15   3 -0.9621 1.80261   3
  -5 -15  -3 17.7017 7.55972   2
   6 -15   3 6.72147 5.93715   2
  -6 -15  -3 13.5566 8.44813   2
   6 -15   3 -0.5333 3.34285   3
  -7 -15  -3 186.243 21.8418   2
   7 -15   3 202.238 23.1610   2
   7 -15   3 254.688 30.0597   3
  -8 -15  -3 67.8229 17.1270   2
   8 -15   3 83.8726 19.1357   2
   8 -15   3 55.7322 19.1310   3
   9 -15   3 15.3935 9.78346   2
  -9 -15  -3 15.1866 8.05533   2
   9 -16  -3 0.80472 2.96743   2
  -9 -16   3 2.84598 5.12578   2
  -8 -16   3 5.29705 4.56976   2
  -8 -16   3 11.9439 7.81926   1
   8 -16  -3 9.17232 6.52045   2
   8 -16  -3 7.32385 8.08215   3
  -7 -16   3 84.0738 19.7823   1
  -7 -16   3 80.5571 17.1859   2
   7 -16  -3 125.847 21.5022   2
   7 -16  -3 110.381 24.2734   3
   6 -16  -3 47.5880 13.5921   2
  -6 -16   3 64.0443 16.3277   1
  -6 -16   3 42.8410 12.5044   2
   6 -16  -3 63.8435 17.0210   3
   5 -16  -3 202.388 22.2843   2
  -5 -16   3 150.189 23.3812   1
  -5 -16   3 218.272 23.2693   2
   5 -16  -3 196.247 30.5948   3
  -4 -16   3 263.151 25.0592   2
   4 -16  -3 238.956 24.0309   2
  -4 -16   3 221.027 22.7712   1
   4 -16  -3 224.968 24.6115   3
   4  16  -3 258.694 23.7015   1
   3 -16  -3 1.33347 3.88304   2
   3 -16  -3 7.44806 6.96513   3
  -3 -16   3 7.44097 2.87295   3
  -3 -16   3 6.12882 5.45810   2
   3  16  -3 -0.1974 1.82435   1
   2 -16  -3 33.6091 11.3273   3
   2 -16  -3 19.3270 8.86897   2
  -2 -16   3 12.3192 5.36195   3
  -2 -16   3 13.1987 6.11970   1
  -2 -16   3 14.1057 7.17917   2
   2  16  -3 24.0956 8.65326   1
  -2  16   3 32.1416 6.54871   1
  -2  16   3 16.0975 5.27984   1
  -1 -16   3 228.925 19.5750   1
   1 -16  -3 231.194 23.4443   2
  -1 -16   3 216.437 17.9552   3
  -1 -16   3 211.189 22.7778   2
   1 -16  -3 236.338 21.3517   3
  -1  16   3 185.270 15.5170   1
  -1  16   3 203.411 16.8240   1
   1  16  -3 259.187 20.1538   1
   0 -16   3 26.5249 8.87208   3
   0 -16  -3 24.2207 8.02364   3
   0 -16   3 36.7141 12.2722   2
   0 -16   3 15.1285 6.16110   1
   0 -16  -3 10.4516 6.66490   2
   0  16  -3 34.0883 9.01405   1
   0  16   3 19.9391 7.07613   1
   0  16   3 30.0225 9.05196   1
   1 -16   3 4.33663 5.02930   3
  -1 -16  -3 15.2843 7.81549   2
   1 -16   3 17.0986 6.30021   1
   1 -16   3 9.60924 6.05712   2
  -1 -16  -3 12.1313 5.71121   3
   1  16   3 13.6392 6.84030   1
   2 -16   3 -1.1693 2.68540   3
  -2 -16  -3 2.05071 5.00577   2
   2 -16   3 3.26939 4.90286   2
  -2  16  -3 0.03813 1.44446   1
   2  16   3 -1.7518 1.41821   1
   3 -16   3 2.16096 4.20115   3
   3 -16   3 16.6831 9.03015   2
  -3 -16  -3 11.7903 8.03703   2
   3  16   3 -0.2083 1.39194   1
  -3  16  -3 11.8076 3.22438   1
  -4 -16  -3 5.42781 4.79178   2
   4 -16   3 3.45736 4.92789   3
   4 -16   3 1.10179 3.93656   2
   4  16   3 12.1368 7.31716   1
   5 -16   3 2.58110 5.25749   2
   5 -16   3 14.4636 8.15648   3
  -5 -16  -3 -2.2060 1.85070   2
  -6 -16  -3 10.1165 7.13719   2
   6 -16   3 11.3119 8.28320   2
   6 -16   3 3.51439 5.65567   3
   7 -16   3 232.825 25.7614   2
   7 -16   3 149.587 41.0879   3
  -7 -16  -3 244.207 25.5666   2
  -8 -16  -3 273.445 32.6363   2
   8 -16   3 233.805 38.2649   3
   8 -16   3 271.291 28.3978   2
   9 -16   3 130.884 23.8945   2
  -9 -16  -3 103.126 20.7099   2
  -8 -17   3 10.2129 7.62358   2
   7 -17  -3 23.9803 10.5917   2
  -7 -17   3 18.8610 8.76521   1
  -7 -17   3 13.5881 8.16615   2
   7 -17  -3 12.7215 9.66778   3
   6 -17  -3 75.9361 16.6243   2
  -6 -17   3 70.7383 17.1314   2
   6 -17  -3 109.228 23.2941   3
  -6 -17   3 81.7712 17.5406   1
   5 -17  -3 225.047 24.1421   2
  -5 -17   3 181.406 21.9203   1
   5 -17  -3 180.883 29.1929   3
  -5 -17   3 224.455 24.1629   2
   4 -17  -3 249.188 25.3424   2
  -4 -17   3 227.252 24.4411   2
  -4 -17   3 236.288 23.7487   1
   4 -17  -3 246.971 26.5133   3
   3 -17  -3 216.591 23.2883   2
  -3 -17   3 201.037 20.6837   1
   3 -17  -3 205.248 23.0112   3
  -3 -17   3 142.784 22.2493   2
   2 -17  -3 47.3388 12.6932   2
   2 -17  -3 51.6726 12.7346   3
  -2 -17   3 59.8402 13.0979   1
  -2 -17   3 82.8630 18.2120   3
  -2 -17   3 49.1148 14.3432   2
   2  17  -3 70.9333 14.5804   1
  -2  17   3 57.6899 8.77393   1
  -2  17   3 52.5293 9.54554   1
  -1 -17   3 203.404 19.0658   1
   1 -17  -3 207.513 20.8196   3
   1 -17  -3 255.614 25.6227   2
  -1 -17   3 224.670 24.0400   2
  -1 -17   3 224.273 18.6548   3
   1  17  -3 218.575 19.0999   1
  -1  17   3 224.837 18.0882   1
  -1  17   3 206.596 16.1903   1
   0 -17  -3 98.2938 16.4455   3
   0 -17   3 67.3652 14.9778   2
   0 -17  -3 97.1974 18.8082   2
   0 -17   3 70.1880 12.9491   1
   0 -17   3 69.6092 14.2115   3
   0  17   3 83.2335 13.5199   1
   0  17  -3 98.5894 15.2592   1
   0  17   3 61.7813 12.4866   1
  -1 -17  -3 0.22056 4.98906   2
   1 -17   3 -2.7123 3.19845   2
   1 -17   3 5.40847 5.23166   3
   1 -17   3 5.22063 4.35420   1
  -1 -17  -3 -2.8266 3.22797   3
  -1  17  -3 -0.0661 2.45509   1
   1  17   3 -1.1594 2.57816   1
  -2 -17  -3 20.1826 8.67307   2
   2 -17   3 48.4081 14.1053   3
   2 -17   3 49.2254 15.2253   2
  -2  17  -3 48.1666 8.71218   1
   2  17   3 37.5097 12.4111   1
   3 -17   3 78.0751 18.6886   2
   3 -17   3 86.8585 18.9794   3
  -3 -17  -3 78.6425 18.9518   2
   4 -17   3 19.1323 9.32907   2
   4 -17   3 12.8569 9.28860   3
  -4 -17  -3 10.6808 7.19882   2
   5 -17   3 224.677 25.3084   2
  -5 -17  -3 217.608 24.4604   2
   5 -17   3 257.710 28.9688   3
   6 -17   3 314.488 33.7865   3
  -6 -17  -3 347.272 31.4717   2
   6 -17   3 297.899 33.7925   2
   7 -17   3 26.7675 13.5112   3
  -7 -17  -3 41.7617 13.7141   2
   7 -17   3 55.5960 15.2136   2
   8 -17   3 259.616 28.2476   2
  -8 -17  -3 210.292 24.9963   2
  -8 -18   3 3.71006 4.90815   2
   8 -18  -3 -2.0479 2.47308   2
  -7 -18   3 -1.9323 2.33449   1
   7 -18  -3 -1.0215 4.20765   3
   7 -18  -3 -1.2138 3.15550   2
  -6 -18   3 -0.3978 2.63906   2
  -6 -18   3 -1.2787 2.81165   1
  -5 -18   3 130.523 22.8784   1
   5 -18  -3 112.734 22.5542   3
   5 -18  -3 181.588 29.4123   2
  -5 -18   3 162.068 25.8415   2
   4 -18  -3 71.6526 17.0481   2
  -4 -18   3 58.1380 14.8291   1
  -4 -18   3 66.5051 15.3342   2
   4 -18  -3 57.6130 15.9946   3
  -3 -18   3 365.353 29.2690   1
   3 -18  -3 336.551 30.6320   3
  -3 -18   3 398.222 33.3343   2
   3 -18  -3 336.689 30.8814   2
   2 -18  -3 544.741 43.0591   3
   2 -18  -3 493.632 38.5722   2
  -2 -18   3 518.780 34.4426   1
  -2 -18   3 477.623 38.1737   2
  -2 -18   3 520.194 28.0311   3
  -2  18   3 599.799 28.5240   1
  -2  18   3 569.149 25.7469   1
  -1 -18   3 159.512 15.7027   3
  -1 -18   3 112.428 19.3354   2
   1 -18  -3 118.991 21.7018   2
   1 -18  -3 147.748 21.8669   3
  -1 -18   3 140.909 15.9050   1
   1  18  -3 159.390 16.5528   1
  -1  18   3 139.385 15.1651   1
  -1  18   3 139.399 13.3353   1
   0 -18   3 77.7416 15.8240   3
   0 -18  -3 79.8133 15.4244   3
   0 -18  -3 69.2022 16.9017   2
   0 -18   3 85.2606 20.2200   2
   0 -18   3 85.2077 14.6908   1
   0  18  -3 96.4473 15.7446   1
   0  18   3 77.2285 13.6422   1
   0  18   3 90.0059 14.9127   1
   1 -18   3 2.93000 4.39352   3
   1 -18   3 13.3110 6.04020   1
   1 -18   3 5.75058 5.92885   2
  -1 -18  -3 7.02526 4.88904   3
  -1 -18  -3 1.68091 5.07771   2
   1  18   3 1.37105 3.58024   1
   1  18   3 -2.5133 1.58627   1
  -1  18  -3 2.94231 2.89839   1
  -2 -18  -3 -2.8874 2.67216   2
   2 -18   3 0.78847 4.49999   2
   2 -18   3 0.94491 3.87098   3
  -2  18  -3 -0.8024 1.70062   1
  -3 -18  -3 4.30878 5.50757   2
   3 -18   3 25.3895 11.3039   2
   3 -18   3 4.54855 6.63881   3
   4 -18   3 177.811 28.5021   2
   4 -18   3 165.763 26.6804   3
  -4 -18  -3 184.851 30.0804   2
  -5 -18  -3 43.8769 21.0913   2
   5 -18   3 78.0070 19.9307   3
   5 -18   3 60.3443 18.0603   2
   6 -18   3 230.879 27.2726   2
  -6 -18  -3 241.061 27.2051   2
   6 -18   3 260.578 31.1835   3
  -7 -18  -3 286.357 29.6580   2
   7 -18   3 284.686 32.6980   2
   7 -18   3 373.111 74.3288   3
  -7 -19   3 -1.3313 3.36229   2
  -6 -19   3 14.2855 9.24088   2
   6 -19  -3 11.8738 8.05002   2
   6 -19  -3 13.0592 9.06973   3
  -6 -19   3 24.1923 12.3128   1
   5 -19  -3 17.6634 9.58763   2
   5 -19  -3 3.73718 7.54305   3
  -5 -19   3 -1.7389 2.22128   1
  -5 -19   3 2.91660 5.34662   2
  -4 -19   3 250.204 25.6741   1
   4 -19  -3 234.546 26.7018   2
   4 -19  -3 344.659 32.3419   3
   3 -19  -3 289.791 49.1171   2
  -3 -19   3 300.117 32.9788   2
   3 -19  -3 358.745 31.9271   3
  -3 -19   3 386.126 30.4755   1
   2 -19  -3 47.8519 13.1807   3
   2 -19  -3 45.2164 19.2295   2
  -2 -19   3 84.2909 16.6919   1
  -2 -19   3 62.9221 10.5435   3
  -2 -19   3 48.3356 14.0825   2
  -2  19   3 59.3218 7.23739   1
   2  19  -3 66.9780 15.4782   1
  -2  19   3 46.3350 9.81858   1
   1 -19  -3 138.081 26.0307   2
  -1 -19   3 118.064 13.9212   3
  -1 -19   3 92.0273 19.6919   2
  -1 -19   3 81.3825 17.7482   1
   1 -19  -3 107.681 18.2066   3
  -1  19   3 120.308 16.7977   1
  -1  19   3 108.110 11.8352   1
   0 -19   3 3.49794 5.01371   2
   0 -19   3 3.63940 3.85274   1
   0 -19  -3 0.76584 3.16090   3
   0 -19  -3 6.42274 7.78129   2
   0 -19   3 2.60077 3.59386   3
   0  19  -3 1.81157 2.79456   1
   0  19   3 0.90918 3.27405   1
   0  19   3 6.03274 4.75868   1
   1 -19   3 45.4036 16.7508   3
   1 -19   3 108.001 29.4553   2
  -1 -19  -3 68.3165 12.5070   3
  -1 -19  -3 103.467 28.5741   2
  -1  19  -3 67.8661 12.3336   1
   1  19   3 55.5435 12.9426   1
   2 -19   3 0.42405 5.19954   2
   2 -19   3 1.72382 4.36398   3
  -2 -19  -3 1.16658 6.29092   2
  -2  19  -3 4.90096 2.95759   1
   2  19   3 -1.1093 2.43036   1
  -3 -19  -3 2.86526 4.56706   2
   3 -19   3 -1.5683 2.14854   3
   3 -19   3 1.12290 4.57576   2
   4 -19   3 80.9878 20.1413   2
   4 -19   3 81.1242 19.5191   3
  -4 -19  -3 54.5558 16.9316   2
   5 -19   3 159.037 39.3085   3
  -5 -19  -3 202.644 31.3568   2
   5 -19   3 220.907 26.5424   2
   6 -19   3 245.053 30.7817   3
  -6 -19  -3 329.180 61.7548   2
  -5 -20   3 -0.4204 2.50670   1
   5 -20  -3 2.55245 4.89027   3
  -5 -20   3 -0.0249 3.68676   2
  -4 -20   3 130.517 24.1778   1
   4 -20  -3 143.947 28.1310   3
  -4 -20   3 65.0109 16.8688   2
   4 -20  -3 88.4031 21.1604   2
   3 -20  -3 275.464 28.2663   3
  -3 -20   3 289.949 30.2555   2
  -3 -20   3 281.413 26.3627   1
   3 -20  -3 187.569 29.5501   2
  -2 -20   3 55.9876 13.5151   1
   2 -20  -3 87.6398 18.7098   3
   2 -20  -3 68.1011 17.8983   2
  -2 -20   3 59.1997 15.6232   2
  -2 -20   3 94.1524 10.6875   3
  -2  20   3 78.8040 8.07603   1
  -2  20   3 81.7036 9.09343   1
  -1 -20   3 65.2820 12.9983   3
   1 -20  -3 29.2535 11.3899   2
   1 -20  -3 72.6916 18.6439   3
  -1 -20   3 54.4473 16.9416   2
  -1 -20   3 36.7143 10.7091   1
  -1  20   3 73.1339 12.7344   1
  -1  20   3 69.9855 12.1336   1
   0 -20   3 40.2853 14.9043   2
   0 -20   3 35.4461 10.6232   3
   0 -20  -3 72.1275 14.6029   3
   0 -20  -3 39.0616 12.4040   2
   0  20   3 52.9691 12.2229   1
   0  20   3 32.8138 9.42695   1
   0  20  -3 33.9905 9.20284   1
  -1 -20  -3 1.89261 3.23197   3
   1 -20   3 9.75350 7.26441   3
   1 -20   3 1.86744 4.37693   2
  -1 -20  -3 12.2074 9.73980   2
  -1  20  -3 -0.6219 2.45646   1
   1  20   3 6.33491 6.32075   1
   2 -20   3 38.5392 13.3058   2
  -2 -20  -3 48.5333 14.7498   2
   2 -20   3 57.4113 15.4912   3
   2  20   3 64.9080 15.9209   1
  -2  20  -3 52.5355 8.74445   1
   3 -20   3 3.14444 4.47030   3
  -3 -20  -3 12.1861 8.41051   2
   3 -20   3 25.2982 11.6818   2
   4 -20   3 -2.0307 2.95131   3
   5 -20   3 19.7593 10.7472   3
   4 -21  -3 -1.9731 2.86087   3
  -4 -21   3 6.70025 6.23180   1
  -3 -21   3 102.140 20.3755   1
   3 -21  -3 49.1613 14.7179   3
  -2 -21   3 -2.5180 2.73174   1
[truncated: 1,602,268 more chars]
