# Supplementary material for: Cyanide Complexes Based on {Mo6I8}4+ and {W6I8}4+ Cluster Cores
Source: MDPI journal article supplement (doi:10.3390/molecules25245796), 2020-12-08
Supplement: s1 [file s1 › ESI.pdf]

## Cyanide complexes based on $\{\text{Mo}_6\text{I}_8\}^{4+}$ and $\{\text{W}_6\text{I}_8\}^{4+}$ cluster cores

Aleksei S. Pronin <sup>1</sup>, Spartak S. Yarovoy <sup>1</sup>, Yakov M. Gayfulin <sup>1,\*</sup>, Aleksei A. Ryadun <sup>1</sup>, Konstantin A. Brylev <sup>1</sup>, Denis G. Samsonenko <sup>1</sup>, Ilia V. Eltsov <sup>2</sup> and Yuri V. Mironov <sup>1,\*</sup>

<sup>1</sup> Nikolaev Institute of Inorganic Chemistry SB RAS, 3, Acad. Lavrentiev ave., 630090 Novosibirsk, Russian Federation

<sup>2</sup> Novosibirsk State University, 2, Pirogova str., 630090, Novosibirsk, Russian Federation

\* Correspondence: gayfulin@niic.nsc.ru (Y.M.G.); yuri@niic.nsc.ru (Y.V.M.)

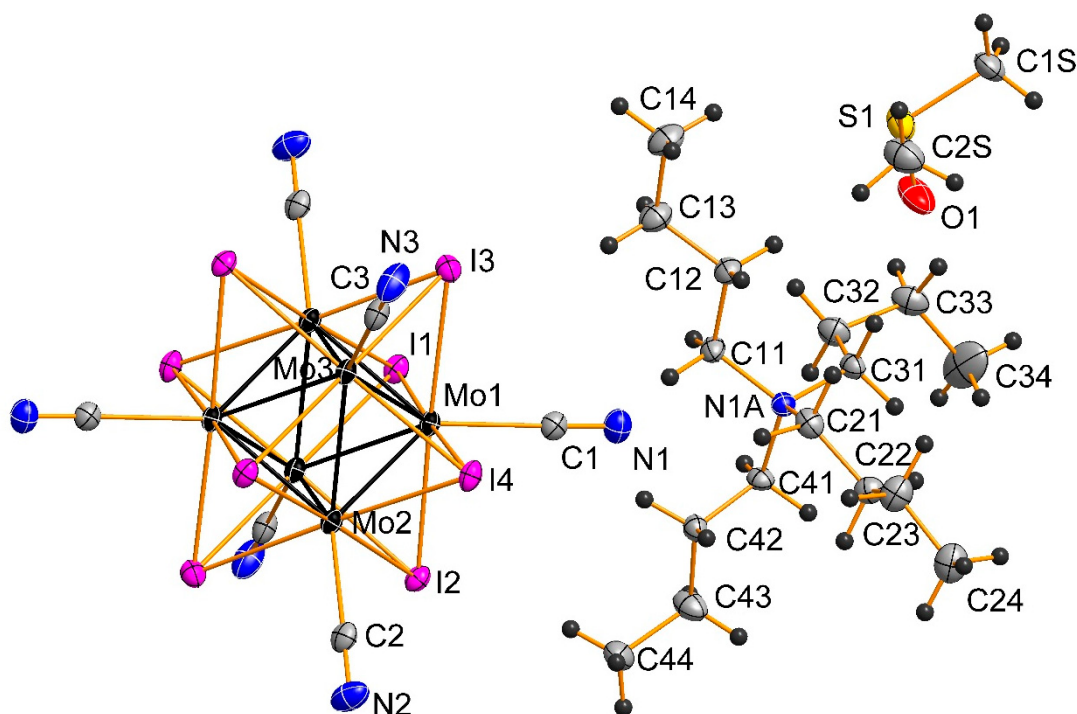

**Figure S1.** Fragment of structure of the compound **3** with numbered atoms (except hydrogens) of asymmetric unit. Atoms are shown as thermal ellipsoids of 50% probability.

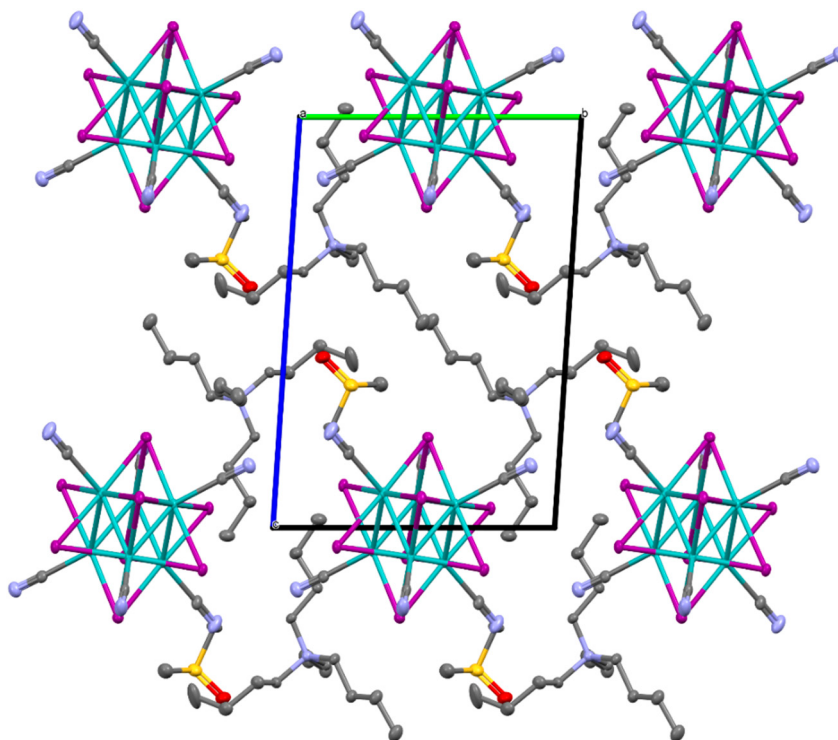

**Figure S2.** Packing of the cluster anions,  $\text{Bu}_4\text{N}^+$  cations and DMSO molecules in the structure of compound **3**, view along *a* direction. Atoms are shown as thermal ellipsoids of 50% probability. Hydrogen atoms are not shown.

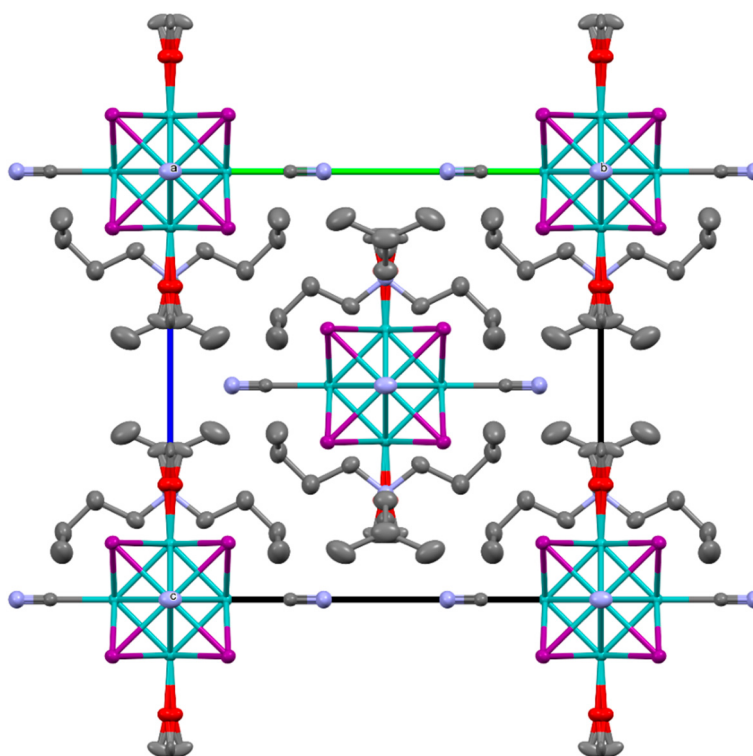

**Figure S3.** Packing diagram for the compound **4**, view along *a* direction. Atoms are shown as thermal ellipsoids of 50% probability. Hydrogen atoms are not shown.

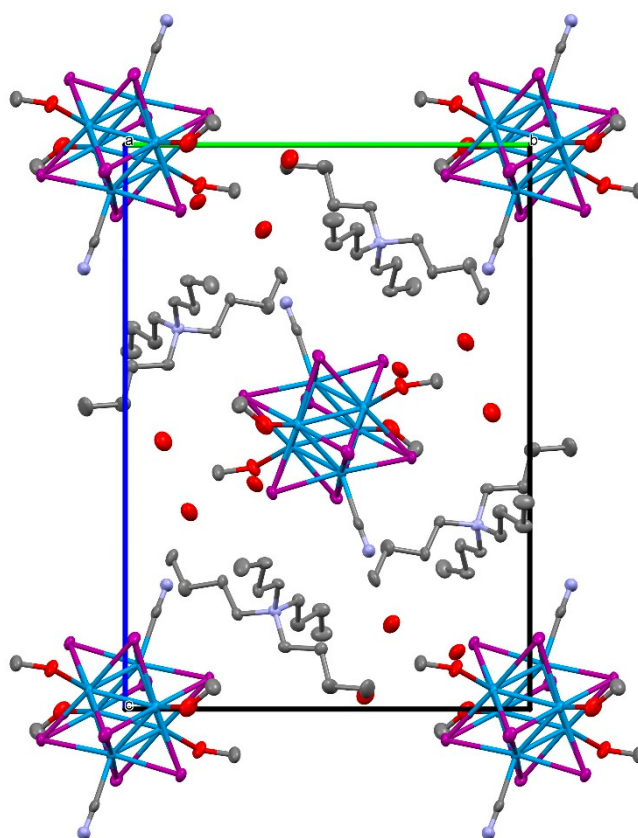

**Figure S4.** Packing diagram for the compound **5**, view along *a* direction. Atoms are shown as thermal ellipsoids of 50% probability. Hydrogen atoms are not shown.
